# Supplementary material for: Succinate mediates inflammation-induced adrenocortical dysfunction
Source: eLife journal article supplement (doi:10.7554/elife.83064), 2023-07-14
Supplement: supp [file Figure1-Suppl1_SourceData1.xlsx]

## Sheet: Sheet1
Figure 1 - figure supplement 1 - Source Data 1
Figure 1 - figure supplement 1 A: Star expression in sorted CD31-CD45- and CD31+CD45+ cells
Summary Statistics (arithmetic from GraphPad Prism 7.04)
PBS		LPS
CD31-CD45-	CD31+CD45+	CD31-CD45-	CD31+CD45+
0.81	0.09	0.92	0.04
1.13	0.12	0.89	0.19
0.97	0.17	1.37	0.09
1.56	0.27	0.74	0.09
0.88	0.16	1.01	0.12
0.83	0.12	1.2	0.07
p value = 0.0022		p value = 0.0022
