# Supplementary material for: Succinate mediates inflammation-induced adrenocortical dysfunction
Source: eLife journal article supplement (doi:10.7554/elife.83064), 2023-07-14
Supplement: supp [file Figure1-Suppl1_SourceData2.xlsx]

## Sheet: Sheet1
Figure 1 - figure supplement 1 - Source Data 2
Figure 1 - figure supplement 1 B: Cd31 expression in sorted CD31-CD45- and CD31+CD45+ cells
Summary Statistics (arithmetic from GraphPad Prism 7.04)
PBS		LPS
CD31-CD45-	CD31+CD45+	CD31-CD45-	CD31+CD45+
0.013	1.088	0.011	0.469
0.007	0.918	0.019	2.708
0.013	0.851	0.01	0.837
0.006	1.343	0.015	1.188
0.002	0.961	0.014	1.101
0.006	0.911	0.006	0.718
p value = 0.0022		p value = 0.0022
