# Supplementary material for: Succinate mediates inflammation-induced adrenocortical dysfunction
Source: eLife journal article supplement (doi:10.7554/elife.83064), 2023-07-14
Supplement: supp [file Figure1-Suppl1_SourceData3.xlsx]

## Sheet: Sheet1
Figure 1 - figure supplement 1 - Source Data 3
Figure 1 - figure supplement 1 C: Cd45 expression in sorted CD31-CD45- and CD31+CD45+ cells
Summary Statistics (arithmetic from GraphPad Prism 7.04)
PBS		LPS
CD31-CD45-	CD31+CD45+	CD31-CD45-	CD31+CD45+
0.03	1	0.07	0.19
0.01	0.83	0.11	3.66
0.02	1.16	0.06	0.77
0.03	1.6	0.08	1.37
0.03	0.85	0.08	1.31
0.04	0.76	0.11	1.02
p value = 0.0022		p value = 0.0022
