# Supplementary material for: Succinate mediates inflammation-induced adrenocortical dysfunction
Source: eLife journal article supplement (doi:10.7554/elife.83064), 2023-07-14
Supplement: supp [file Figure1-Suppl1_SourceData4.xlsx]

## Sheet: Sheet1
Figure 1 - figure supplement 1 - Source Data 4
Figure 1 - figure supplement 1 D: Th expression in medulla, cortex and CD31-CD45- cells
Summary Statistics (arithmetic from GraphPad Prism 7.04)
Medulla	Cortex	CD31-CD45-
30.82	0.86	0.01
46.86	0.79	0.01
58.94	1.63	0.01
45.74	0.9	0.02
p value = 0.0286
p value = 0.0286
