# Supplementary material for: Succinate mediates inflammation-induced adrenocortical dysfunction
Source: eLife journal article supplement (doi:10.7554/elife.83064), 2023-07-14
Supplement: supp [file Figure1-Suppl1_SourceData5.xlsx]

## Sheet: Sheet1
Figure 1 - figure supplement 1 - Source Data 5
Figure 1 - figure supplement 1 E: Pnmt expression in medulla, cortex and CD31-CD45- cells
Summary Statistics (arithmetic from GraphPad Prism 7.04)
Medulla	Cortex	CD31-CD45-
31.04	0.89	0.27
42.13	0.66	0.42
50.53	1.35	0.17
58.81	1.27	0.2
p value = 0.0286
p value = 0.0286
