# Supplementary material for: Succinate mediates inflammation-induced adrenocortical dysfunction
Source: eLife journal article supplement (doi:10.7554/elife.83064), 2023-07-14
Supplement: supp [file Figure1-Suppl2_SourceData1.xlsx]

## Sheet: Sheet1
Figure 1 - figure supplement 2 - Source Data 1
Figure 1 - figure supplement 1 A - E: Expression of Star, Cyp11b1, 3b-Hsd2, Cyp21a1 and Cyp11a in adrenocortical cells of PBS- and LPS-mice
Summary Statistics (arithmetic from GraphPad Prism 7.04)
Star			Cyp11b1			3b-Hsd2			Cyp21a1			Cyp11a1
PBS	LPS		PBS	LPS		PBS	LPS		PBS	LPS		PBS	LPS
1.09	1.36		1.16	1.68		1.41	1.52		1.1	0.93		1.26	1.5
0.8	0.92		0.76	1.04		0.46	0.53		0.92	0.38		1.08	1.23
1.25	1.55		1.09	1.71		2.46	0.6		1.28	0.77		1.12	1.6
1.12	1.32		1.23	1.71		0.84	0.35		1.32	0.68		0.94	1.06
1.21	1.18		1.01	1.14		0.68	0.41		1.17	0.64		1.77	0.91
0.89	1.39		0.86	2.33		1.09	0.44		0.74	0.82		0.88	1.23
0.91	1.58		0.86	1.49			0.57		0.86	0.79		0.73	1.71
0.84	1.11		1.12	1.75			0.41		0.79	0.62		0.61	1.48
p value = 0.0148			p value = 0.0044			p value = 0.0403			p value = 0.0115			p value = 0.1231
