# Supplementary material for: Succinate mediates inflammation-induced adrenocortical dysfunction
Source: eLife journal article supplement (doi:10.7554/elife.83064), 2023-07-14
Supplement: supp [file Figure1-Suppl2_SourceData2.xlsx]

## Sheet: Sheet1
Figure 1 - figure supplement 2 - Source Data 2
Figure 1 - figure supplement 1 F: Mean fluorescence intensity of SF-1 in adrenal glands from PBS- and LPS-mice
Summary Statistics (arithmetic from GraphPad Prism 7.04)
PBS	LPS
15401	9821
9179	9716
13399	9295
19195	17269
23628	9882
17499	11741
p value = 0.132
