# Supplementary material for: Succinate mediates inflammation-induced adrenocortical dysfunction
Source: eLife journal article supplement (doi:10.7554/elife.83064), 2023-07-14
Supplement: supp [file Figure1_SourceData1.xlsx]

## Sheet: AdrenalCortex_PBS-LPS
Figure 1 - Source Data 1
Figure 1 A: Differentially expressed genes in adrenal cortex of PBS- and LPS-mice
Upregulated genes										Downregulated genes
Ensembl Release	baseMean	log2(FoldChange)	Fold Change	lfcSE	stat	pvalue	padj	symbol		Ensembl Release	baseMean	log2(FoldChange)	Fold Change	lfcSE	stat	pvalue	padj	symbol
ENSMUSG00000050565	3594.02	0.215005	1.16071	0.0793982	2.70794	0.00677026	0.0429489	Tor1aip2		ENSMUSG00000040229	37.6432	-3.12152	0.114902	0.454286	-6.87127	6.36e-12	2.55e-09	Gpr34
ENSMUSG00000027652	2625.48	0.217641	1.16283	0.0797861	2.72781	0.00637563	0.0410185	Ralgapb		ENSMUSG00000008845	6.21726	-3.09613	0.116943	1.12395	-2.75468	0.00587497	0.0386189	Cd163
ENSMUSG00000067851	2174.01	0.219964	1.1647	0.081326	2.70471	0.00683631	0.0432975	Arfgef1		ENSMUSG00000024042	967.022	-2.93538	0.130726	0.818337	-3.587	0.000334499	0.00457286	Sik1
ENSMUSG00000032096	5935.88	0.224292	1.1682	0.0750394	2.98899	0.00279903	0.0224324	Arcn1		ENSMUSG00000021384	1647.4	-2.74673	0.148989	0.603986	-4.54766	5.42e-06	0.000185309	Susd3
ENSMUSG00000052752	1688.42	0.226722	1.17017	0.0853521	2.65632	0.00789996	0.0480086	Traf7		ENSMUSG00000023034	8897.39	-2.73949	0.149738	0.824831	-3.32127	0.000896087	0.00949742	Nr4a1
ENSMUSG00000034707	3571.05	0.228762	1.17183	0.0821137	2.78592	0.0053376	0.0360616	Gns		ENSMUSG00000022057	22.7121	-2.68325	0.15569	0.620259	-4.32602	1.52e-05	0.000421769	Adamdec1
ENSMUSG00000038733	5061.44	0.229188	1.17218	0.0760986	3.01173	0.00259764	0.021269	Wdr26		ENSMUSG00000028801	19.5824	-2.54181	0.171728	0.610866	-4.16099	3.17e-05	0.000766969	Stpg1
ENSMUSG00000068823	8460.87	0.230008	1.17284	0.0832506	2.76284	0.00573008	0.0379864	Csde1		ENSMUSG00000004902	21.6443	-2.51868	0.174503	0.648881	-3.88158	0.000103782	0.00189724	Slc25a18
ENSMUSG00000032612	2509	0.230917	1.17358	0.0858774	2.68891	0.00716851	0.0449123	Usp4		ENSMUSG00000040950	39.2019	-2.42762	0.185872	0.427016	-5.68508	1.31e-08	1.34e-06	Mgl2
ENSMUSG00000021377	2892.82	0.232487	1.17486	0.0857166	2.71228	0.00668225	0.0425636	Dek		ENSMUSG00000074623	11.6147	-2.34734	0.196507	0.757515	-3.09874	0.00194344	0.0173278	Gm826
ENSMUSG00000029407	3560.35	0.233291	1.17551	0.0807003	2.89083	0.00384226	0.0285509	Uso1		ENSMUSG00000045382	4079.52	-2.34658	0.196611	0.469088	-5.00244	5.66e-07	3e-05	Cxcr4
ENSMUSG00000020152	5544.8	0.233572	1.17574	0.076224	3.06428	0.00218193	0.0188827	Actr2		ENSMUSG00000046999	10.6725	-2.32011	0.200253	0.827425	-2.80401	0.00504717	0.0346815	1110032F04Rik
ENSMUSG00000005615	2186.32	0.234321	1.17635	0.0881301	2.65881	0.00784169	0.0477475	Pcyt1a		ENSMUSG00000039533	1174	-2.28698	0.204904	0.458344	-4.98966	6.05e-07	3.19e-05	Mmd2
ENSMUSG00000024393	4899.44	0.234328	1.17636	0.0865076	2.70875	0.00675362	0.0428936	Prrc2a		ENSMUSG00000030935	25.571	-2.27871	0.206082	0.796595	-2.86056	0.00422888	0.0305654	Acsm3
ENSMUSG00000042520	1708.7	0.237867	1.17925	0.0896878	2.65216	0.00799778	0.0483771	Ubap2l		ENSMUSG00000032528	20.0494	-2.274	0.206756	0.719359	-3.16114	0.00157153	0.0147799	Vipr1
ENSMUSG00000022698	4791.95	0.238161	1.17949	0.0846046	2.81498	0.00487799	0.0338167	Naa50		ENSMUSG00000031613	164.6	-2.16607	0.222816	0.30265	-7.15702	8.24e-13	5.15e-10	Hpgd
ENSMUSG00000020741	5253.98	0.239416	1.18051	0.0792425	3.02131	0.00251686	0.0208674	Cluh		ENSMUSG00000078439	13.5167	-2.10772	0.232013	0.710614	-2.96606	0.00301645	0.0237722	Smim24
ENSMUSG00000035247	2624	0.241641	1.18234	0.090097	2.682	0.00731825	0.0456098	Hectd1		ENSMUSG00000025936	30.1064	-2.05708	0.240302	0.670373	-3.06856	0.0021509	0.0186976	Gm4956
ENSMUSG00000032407	1776.99	0.244545	1.18472	0.0863556	2.83184	0.00462816	0.0326059	U2surp		ENSMUSG00000032531	3519.56	-2.00253	0.249563	0.574809	-3.48381	0.000494326	0.00611039	Amotl2
ENSMUSG00000034807	1775.05	0.247971	1.18754	0.0927098	2.67471	0.0074795	0.0462822	Colgalt1		ENSMUSG00000074595	24.2376	-1.98528	0.252564	0.65078	-3.05062	0.00228371	0.0194827	Wfdc6a
ENSMUSG00000051391	9534.98	0.249084	1.18845	0.0934989	2.66403	0.00772105	0.0473081	Ywhag		ENSMUSG00000089789	27.2841	-1.96709	0.255769	0.644966	-3.04991	0.00228911	0.0195181	Rdh1
ENSMUSG00000062234	1713.79	0.249126	1.18849	0.0933389	2.66904	0.00760677	0.0468507	Gak		ENSMUSG00000029830	18.3615	-1.96435	0.256255	0.60079	-3.26961	0.00107697	0.0109392	Svopl
ENSMUSG00000021820	1194.97	0.249311	1.18864	0.090046	2.7687	0.00562801	0.037581	Camk2g		ENSMUSG00000052837	2189.51	-1.94356	0.259975	0.644372	-3.0162	0.00255962	0.0211053	Junb
ENSMUSG00000032293	2827.09	0.249781	1.18903	0.0935208	2.67087	0.00756559	0.0466669	Ireb2		ENSMUSG00000028773	27.5584	-1.94194	0.260266	0.652978	-2.97398	0.00293967	0.0233677	Fabp3
ENSMUSG00000024097	2699.45	0.250863	1.18992	0.0931489	2.69314	0.00707834	0.0445498	Srsf7		ENSMUSG00000058174	66.2924	-1.93906	0.260787	0.368734	-5.25869	1.45e-07	9.81e-06	Gm5148
ENSMUSG00000030421	2076.89	0.25155	1.19049	0.0881683	2.85307	0.00432988	0.0310653	Uri1		ENSMUSG00000084169	44.5264	-1.93127	0.262198	0.483953	-3.99062	6.59e-05	0.00134667	NA
ENSMUSG00000027189	2886.93	0.255663	1.19388	0.0781812	3.27013	0.00107499	0.0109334	Trim44		ENSMUSG00000049404	101.965	-1.90846	0.266378	0.333681	-5.7194	1.07e-08	1.14e-06	Rarres1
ENSMUSG00000050912	8116.12	0.256151	1.19429	0.0855082	2.99563	0.00273881	0.0220859	Tmem123		ENSMUSG00000050164	24.8608	-1.89416	0.26903	0.563333	-3.36242	0.000772632	0.00850658	Mchr1
ENSMUSG00000033039	2312.33	0.256511	1.19459	0.0813727	3.1523	0.00161991	0.0150986	Micall1		ENSMUSG00000070533	26.7728	-1.84961	0.277467	0.522517	-3.53981	0.00040041	0.00519634	Wfdc8
ENSMUSG00000041297	1112.44	0.257308	1.19525	0.0949381	2.71027	0.00672279	0.042752	Cdk13		ENSMUSG00000004609	98.1204	-1.83911	0.279494	0.283456	-6.48818	8.69e-11	2.12e-08	Cd33
ENSMUSG00000020044	26966.3	0.258144	1.19594	0.0947403	2.72475	0.00643493	0.0413085	Timp3		ENSMUSG00000024471	20.5733	-1.81805	0.283603	0.646494	-2.81217	0.00492083	0.034023	Myot
ENSMUSG00000027111	4430.55	0.259487	1.19705	0.0982534	2.641	0.00826614	0.0495778	Itga6		ENSMUSG00000031162	27.0307	-1.81694	0.283821	0.460802	-3.943	8.05e-05	0.00156447	Gata1
ENSMUSG00000038127	2960.91	0.260134	1.19759	0.0917782	2.83438	0.00459154	0.0323918	Ccdc50		ENSMUSG00000086129	21.9772	-1.80642	0.2859	0.55274	-3.26812	0.00108265	0.0109899	NA
ENSMUSG00000021096	4059.27	0.260707	1.19807	0.0882577	2.95394	0.0031375	0.0244913	Ppm1a		ENSMUSG00000049892	519.924	-1.77256	0.292688	0.232465	-7.62508	2.44e-14	2.54e-11	Rasd1
ENSMUSG00000021111	4263.6	0.263035	1.2	0.0814727	3.22851	0.00124437	0.012203	Papola		ENSMUSG00000032278	54.5709	-1.73772	0.299844	0.328459	-5.2905	1.22e-07	8.39e-06	Paqr5
ENSMUSG00000027519	1877.03	0.263086	1.20004	0.0889004	2.95933	0.00308308	0.0241753	Rab22a		ENSMUSG00000003477	39.9019	-1.70333	0.307077	0.463953	-3.67134	0.000241286	0.00361165	Inmt
ENSMUSG00000033885	1437.38	0.263851	1.20068	0.0906184	2.91168	0.00359496	0.0272053	Pxk		ENSMUSG00000037621	34.8697	-1.69617	0.308604	0.451932	-3.75315	0.000174625	0.00281928	Atoh8
ENSMUSG00000071172	4054.64	0.263901	1.20072	0.0986509	2.6751	0.00747067	0.0462822	Srsf3		ENSMUSG00000020108	1401.34	-1.65079	0.318465	0.226741	-7.28052	3.33e-13	2.6e-10	Ddit4
ENSMUSG00000026349	1316.94	0.264371	1.20111	0.097592	2.70895	0.00674975	0.0428885	Ccnt2		ENSMUSG00000051159	237.709	-1.64604	0.319517	0.342836	-4.80123	1.58e-06	6.86e-05	Cited1
ENSMUSG00000039367	2737.08	0.264828	1.20149	0.0787031	3.3649	0.000765714	0.00844232	Sec24c		ENSMUSG00000023153	636.28	-1.6206	0.3252	0.26792	-6.04884	1.46e-09	2.28e-07	Tmem52
ENSMUSG00000032042	3733.94	0.265572	1.20211	0.0829103	3.20313	0.00135944	0.013109	Srpr		ENSMUSG00000020893	823.326	-1.61478	0.326515	0.525405	-3.0734	0.00211637	0.0185206	Per1
ENSMUSG00000024045	1333.05	0.265974	1.20245	0.0923667	2.87955	0.00398248	0.0292523	Akap8		ENSMUSG00000043448	37.3376	-1.57592	0.33543	0.405595	-3.88545	0.000102142	0.00187165	Gjc2
ENSMUSG00000028577	2171.47	0.269738	1.20559	0.0908099	2.97035	0.00297456	0.0235713	Plaa		ENSMUSG00000055235	45.8986	-1.57317	0.33607	0.388823	-4.04596	5.21e-05	0.00112037	Wdr86
ENSMUSG00000032580	2079.41	0.271557	1.20711	0.0995441	2.728	0.00637187	0.0410185	Rbm5		ENSMUSG00000015312	3004.77	-1.56047	0.33904	0.569124	-2.74189	0.00610876	0.0397541	Gadd45b
ENSMUSG00000021000	2614.74	0.271642	1.20718	0.0849483	3.19773	0.00138514	0.0133158	Mia2		ENSMUSG00000024747	283.564	-1.55578	0.340145	0.312609	-4.97675	6.47e-07	3.38e-05	Aldh1a7
ENSMUSG00000030259	1621.32	0.272203	1.20765	0.101785	2.67428	0.00748889	0.0462985	Rassf8		ENSMUSG00000036395	155.119	-1.55082	0.341315	0.328179	-4.72555	2.29e-06	9.4e-05	Glb1l2
ENSMUSG00000026341	2968.48	0.272763	1.20812	0.0823038	3.3141	0.000919401	0.00970499	Actr3		ENSMUSG00000018459	37.0542	-1.51287	0.350414	0.449514	-3.36556	0.000763883	0.00844232	Slc13a3
ENSMUSG00000039463	934.549	0.273748	1.20894	0.0974025	2.81048	0.00494669	0.0341716	Slc9a8		ENSMUSG00000035828	1936.93	-1.4842	0.357447	0.351009	-4.22837	2.35e-05	0.000598393	Pim3
ENSMUSG00000025283	1639.57	0.2744	1.20949	0.0909403	3.01736	0.00254985	0.0210514	Sat1		ENSMUSG00000049555	115.904	-1.44983	0.366064	0.308837	-4.69449	2.67e-06	0.000106715	Tmie
ENSMUSG00000039275	1231.09	0.27641	1.21118	0.0988912	2.79509	0.00518854	0.035311	Foxk2		ENSMUSG00000026768	392.025	-1.43519	0.369799	0.248921	-5.76563	8.14e-09	9.27e-07	Itga8
ENSMUSG00000040945	1831.07	0.276985	1.21166	0.103429	2.67801	0.00740604	0.0459917	Rcc2		ENSMUSG00000030087	304.739	-1.43103	0.370867	0.26613	-5.37717	7.57e-08	5.65e-06	Klf15
ENSMUSG00000030435	1881.9	0.277614	1.21219	0.101211	2.74292	0.00608956	0.0396822	U2af2		ENSMUSG00000068874	464.016	-1.41738	0.374391	0.203316	-6.97132	3.14e-12	1.44e-09	Selenbp1
ENSMUSG00000025020	1685.54	0.27849	1.21293	0.104311	2.6698	0.00758957	0.0467779	Slit1		ENSMUSG00000026712	351.685	-1.39373	0.380579	0.26897	-5.18174	2.2e-07	1.4e-05	Mrc1
ENSMUSG00000005813	1236.22	0.279986	1.21418	0.0917789	3.05066	0.00228342	0.0194827	Metap1		ENSMUSG00000107689	51.0688	-1.38953	0.381688	0.383704	-3.62137	0.000293044	0.00412249	NA
ENSMUSG00000026103	2030.17	0.280992	1.21503	0.0982778	2.85916	0.00424769	0.0306446	Gls		ENSMUSG00000041797	157.487	-1.38051	0.384084	0.320351	-4.30936	1.64e-05	0.000447136	Abca9
ENSMUSG00000042772	1165.23	0.281034	1.21507	0.0946689	2.9686	0.00299159	0.0236479	Smg7		ENSMUSG00000031886	94.8704	-1.38011	0.384188	0.278175	-4.96132	7e-07	3.58e-05	Ces2e
ENSMUSG00000002741	2143.14	0.281834	1.21574	0.0985615	2.85948	0.0042434	0.0306278	Ykt6		ENSMUSG00000087259	147.163	-1.37658	0.385131	0.238117	-5.7811	7.42e-09	8.58e-07	2610035D17Rik
ENSMUSG00000006169	1914.81	0.282863	1.21661	0.0875422	3.23116	0.00123288	0.012147	Clint1		ENSMUSG00000036655	55.0923	-1.36298	0.38878	0.38071	-3.58009	0.000343476	0.00465077	Colec11
ENSMUSG00000030403	944.919	0.284302	1.21782	0.107409	2.6469	0.00812327	0.0489654	Vasp		ENSMUSG00000042340	22.861	-1.35999	0.389586	0.478378	-2.84291	0.00447032	0.0318388	Ctf1
ENSMUSG00000026245	1301.67	0.285797	1.21908	0.0990758	2.88463	0.00391874	0.0289812	Farsb		ENSMUSG00000045259	95.7919	-1.35975	0.389651	0.282703	-4.80981	1.51e-06	6.63e-05	Klhdc9
ENSMUSG00000021143	1115.94	0.28607	1.21931	0.10805	2.64757	0.00810734	0.0488883	Pacs2		ENSMUSG00000030607	988.484	-1.34586	0.393419	0.242591	-5.54787	2.89e-08	2.61e-06	Acan
ENSMUSG00000025220	2002.43	0.286169	1.2194	0.0898516	3.18491	0.00144801	0.013835	Mgea5		ENSMUSG00000028128	163.631	-1.3451	0.393627	0.332013	-4.05134	5.09e-05	0.00110421	F3
ENSMUSG00000021413	1376.71	0.286728	1.21987	0.102046	2.80979	0.00495733	0.0342299	Prpf4b		ENSMUSG00000023349	58.5391	-1.34386	0.393965	0.318403	-4.22063	2.44e-05	0.000616442	Clec4n
ENSMUSG00000000339	891.679	0.287997	1.22094	0.104143	2.76541	0.00568512	0.0377897	Rtca		ENSMUSG00000031595	125.927	-1.33948	0.395164	0.275157	-4.86804	1.13e-06	5.13e-05	Pdgfrl
ENSMUSG00000040351	1791.96	0.288248	1.22116	0.0883775	3.26155	0.00110805	0.0111822	Ankib1		ENSMUSG00000064372	64.5648	-1.33108	0.39747	0.346942	-3.83662	0.000124742	0.00219063	NA
ENSMUSG00000026547	1808.79	0.288364	1.22125	0.100829	2.85992	0.00423742	0.0306129	Tagln2		ENSMUSG00000041329	719.503	-1.32234	0.399885	0.203965	-6.48319	8.98e-11	2.16e-08	Atp1b2
ENSMUSG00000039703	2240.58	0.288634	1.22148	0.0851597	3.38933	0.000700643	0.00793215	Nploc4		ENSMUSG00000071324	29.8243	-1.30727	0.404084	0.46856	-2.78998	0.00527109	0.0357016	Armc2
ENSMUSG00000025234	2880.06	0.289227	1.22199	0.0914733	3.16188	0.00156756	0.0147567	Arih1		ENSMUSG00000025496	81.7317	-1.30694	0.404176	0.366567	-3.56535	0.000363366	0.00482386	Drd4
ENSMUSG00000041645	2789.73	0.289238	1.222	0.0960019	3.01284	0.00258816	0.0212329	Ddx24		ENSMUSG00000032554	78.6251	-1.29745	0.406845	0.408096	-3.17927	0.00147648	0.0140126	Trf
ENSMUSG00000000759	802.053	0.291465	1.22388	0.104622	2.78589	0.0053381	0.0360616	Tubgcp3		ENSMUSG00000028378	1439.83	-1.29284	0.408148	0.160307	-8.06476	7.34e-16	1.27e-12	Ptgr1
ENSMUSG00000039048	1013.38	0.29184	1.2242	0.109344	2.66902	0.00760739	0.0468507	Foxred1		ENSMUSG00000074472	56.6253	-1.29042	0.408832	0.348794	-3.69966	0.00021589	0.00333051	Zfp872
ENSMUSG00000005846	2712.45	0.291982	1.22432	0.10382	2.8124	0.0049174	0.034023	Rsl1d1		ENSMUSG00000031129	42.4924	-1.2893	0.409149	0.470052	-2.74289	0.0060901	0.0396822	Slc9a9
ENSMUSG00000063273	2701.97	0.292265	1.22456	0.0841458	3.47332	0.00051406	0.00627974	Naa15		ENSMUSG00000026185	4188.64	-1.28914	0.409195	0.454553	-2.83606	0.00456741	0.0322799	Igfbp5
ENSMUSG00000004865	920.805	0.292489	1.22475	0.103597	2.82334	0.00475258	0.0332127	Srpk1		ENSMUSG00000022763	484.378	-1.28816	0.409474	0.206751	-6.23049	4.65e-10	8.44e-08	Aifm3
ENSMUSG00000007036	1817.84	0.292806	1.22502	0.103142	2.83887	0.00452733	0.0321276	Abhd16a		ENSMUSG00000024014	1530.15	-1.27872	0.412161	0.228612	-5.59341	2.23e-08	2.07e-06	Pim1
ENSMUSG00000043733	4460.78	0.292875	1.22508	0.0783492	3.73808	0.000185431	0.00296007	Ptpn11		ENSMUSG00000013483	93.2352	-1.26351	0.416529	0.25169	-5.0201	5.16e-07	2.81e-05	Card14
ENSMUSG00000020986	1349.62	0.292926	1.22512	0.102507	2.85762	0.00426828	0.0307303	Sec23a		ENSMUSG00000032911	116.201	-1.25569	0.418794	0.292387	-4.29461	1.75e-05	0.000473508	Cspg4
ENSMUSG00000006418	2861.01	0.293394	1.22552	0.0981547	2.9891	0.002798	0.0224324	Rnf114		ENSMUSG00000051669	512.451	-1.25159	0.419985	0.442535	-2.82823	0.00468068	0.0328722	AU021092
ENSMUSG00000021488	2063.48	0.293745	1.22582	0.102269	2.87228	0.00407517	0.0297575	Nsd1		ENSMUSG00000025993	625.021	-1.24894	0.420756	0.199396	-6.26365	3.76e-10	7.38e-08	Slc40a1
ENSMUSG00000022201	3057.9	0.294218	1.22622	0.0882997	3.33205	0.000862102	0.00921702	Zfr		ENSMUSG00000020251	71.9462	-1.22099	0.428988	0.366643	-3.33019	0.000867855	0.0092534	Glt8d2
ENSMUSG00000020458	6531.98	0.295467	1.22728	0.0948167	3.11619	0.00183205	0.0165905	Rtn4		ENSMUSG00000074785	232.995	-1.21788	0.429914	0.258237	-4.71613	2.4e-06	9.72e-05	Plxnc1
ENSMUSG00000023025	1722.01	0.296708	1.22834	0.0937401	3.16522	0.00154963	0.0146004	Larp4		ENSMUSG00000035984	31.5851	-1.21282	0.431425	0.43046	-2.81749	0.00484009	0.0336401	Nme5
ENSMUSG00000017428	1836.9	0.29718	1.22874	0.111668	2.66129	0.0077842	0.0475272	Psmd11		ENSMUSG00000029499	74.8912	-1.21225	0.431595	0.368731	-3.28763	0.00101034	0.0104047	Pxmp2
ENSMUSG00000062421	1763.36	0.29791	1.22936	0.0920633	3.23592	0.0012125	0.0119883	Arf2		ENSMUSG00000085315	105.803	-1.21178	0.431737	0.265485	-4.56439	5.01e-06	0.000174516	NA
ENSMUSG00000027905	584.403	0.298303	1.2297	0.110886	2.69018	0.00714124	0.0448107	Ddx20		ENSMUSG00000036362	47.766	-1.19633	0.436383	0.350928	-3.40905	0.000651889	0.00753815	P2ry13
ENSMUSG00000031578	1018.38	0.298842	1.23016	0.111489	2.68046	0.0073522	0.0457651	Mak16		ENSMUSG00000042109	794.649	-1.19322	0.437326	0.182796	-6.52761	6.68e-11	1.71e-08	Csdc2
ENSMUSG00000000374	1374.01	0.298929	1.23023	0.095661	3.12487	0.00177881	0.0162118	Trappc10		ENSMUSG00000020604	354.682	-1.18981	0.438359	0.274252	-4.3384	1.44e-05	0.000399414	Arsg
ENSMUSG00000030002	1961.75	0.299562	1.23077	0.102486	2.92294	0.0034674	0.0265098	Dusp11		ENSMUSG00000020486	443.719	-1.18854	0.438747	0.202372	-5.87303	4.28e-09	5.48e-07	2020-09-04
ENSMUSG00000040651	963.948	0.299859	1.23102	0.107291	2.79482	0.00519293	0.0353255	Fam208a		ENSMUSG00000045725	109.799	-1.18454	0.439966	0.320635	-3.69434	0.000220458	0.00338145	Prr15
ENSMUSG00000024085	6057.05	0.299955	1.23111	0.0814764	3.6815	0.000231867	0.00352131	Man2a1		ENSMUSG00000025370	43.9256	-1.18037	0.44124	0.414614	-2.8469	0.00441469	0.0315577	Cdh9
ENSMUSG00000043535	1531.75	0.300018	1.23116	0.0909377	3.29915	0.000969765	0.0101239	Setx		ENSMUSG00000041193	2666.1	-1.17452	0.443033	0.177547	-6.61523	3.71e-11	1.11e-08	Pla2g5
ENSMUSG00000059895	907.842	0.300459	1.23154	0.103948	2.89047	0.00384672	0.0285704	Ptp4a3		ENSMUSG00000022371	111.287	-1.17219	0.443749	0.322043	-3.63985	0.000272801	0.00392532	Col14a1
ENSMUSG00000034157	794.451	0.3014	1.23234	0.113162	2.66344	0.00773473	0.0473176	Cipc		ENSMUSG00000049723	117.034	-1.17047	0.444276	0.262016	-4.46718	7.93e-06	0.000247476	Mmp12
ENSMUSG00000031540	1161.73	0.301858	1.23273	0.111782	2.70041	0.00692531	0.0437448	Kat6a		ENSMUSG00000076617	2142.85	-1.16271	0.446673	0.204735	-5.6791	1.35e-08	1.37e-06	NA
ENSMUSG00000024644	1301.76	0.302054	1.2329	0.114299	2.64267	0.00822562	0.0494869	Cndp2		ENSMUSG00000039814	89.7308	-1.15698	0.448452	0.282143	-4.10067	4.12e-05	0.000943013	Xkr5
ENSMUSG00000031657	1140.12	0.30313	1.23382	0.106292	2.85185	0.00434658	0.0311565	Heatr3		ENSMUSG00000034161	398.159	-1.14742	0.45143	0.22553	-5.08767	3.62e-07	2.12e-05	Scx
ENSMUSG00000046020	2666.98	0.30354	1.23417	0.110981	2.73507	0.00623669	0.0404181	Pofut1		ENSMUSG00000027381	953.922	-1.14553	0.452023	0.221054	-5.18214	2.19e-07	1.4e-05	Bcl2l11
ENSMUSG00000042305	1203.68	0.304033	1.23459	0.100431	3.02727	0.0024677	0.02058	Tmem183a		ENSMUSG00000030170	155.803	-1.14488	0.452227	0.222705	-5.1408	2.74e-07	1.66e-05	Wnt5b
ENSMUSG00000015733	4779.07	0.304533	1.23502	0.0765984	3.97571	7.01697e-05	0.00141468	Capza2		ENSMUSG00000107655	145.436	-1.14239	0.453009	0.307044	-3.7206	0.000198747	0.00311218	NA
ENSMUSG00000026558	1068.61	0.304534	1.23502	0.109005	2.79377	0.00520982	0.035425	Uck2		ENSMUSG00000021638	84.4952	-1.13259	0.456095	0.328442	-3.44838	0.000563965	0.006778	Ocln
ENSMUSG00000000826	2937.77	0.305674	1.236	0.0768952	3.97521	7.03174e-05	0.00141468	Dnajc5		ENSMUSG00000097093	36.5136	-1.12831	0.457452	0.413918	-2.72592	0.00641221	0.0411795	C330013E15Rik
ENSMUSG00000000131	1495.75	0.3061	1.23636	0.095378	3.20933	0.00133043	0.0129091	Xpo6		ENSMUSG00000079293	323.619	-1.12761	0.457673	0.273272	-4.12633	3.69e-05	0.000869285	Clec7a
ENSMUSG00000029467	4061.69	0.306108	1.23637	0.0784629	3.90131	9.56752e-05	0.00179252	Atp2a2		ENSMUSG00000002032	105.69	-1.12632	0.458082	0.253532	-4.44253	8.89e-06	0.000271099	Tmem25
ENSMUSG00000021116	2303.86	0.306189	1.23644	0.108698	2.81687	0.0048494	0.0336783	Eif2s1		ENSMUSG00000070691	63.4977	-1.12573	0.45827	0.403539	-2.78965	0.00527652	0.0357229	Runx3
ENSMUSG00000030374	1215.52	0.30634	1.23657	0.106219	2.88404	0.0039261	0.0290219	Strn4		ENSMUSG00000001014	56.0494	-1.11855	0.460558	0.317705	-3.52071	0.0004304	0.00548971	Icam4
ENSMUSG00000066571	1192.55	0.306512	1.23671	0.0989628	3.09724	0.00195331	0.0173959	4931406P16Rik		ENSMUSG00000038894	313.207	-1.11761	0.460856	0.186275	-5.99978	1.98e-09	2.97e-07	Irs2
ENSMUSG00000024081	1474.24	0.307529	1.23759	0.111626	2.755	0.00586926	0.0386189	Cebpz		ENSMUSG00000017417	291.388	-1.11655	0.461194	0.175179	-6.37381	1.84e-10	4.05e-08	Plxdc1
ENSMUSG00000020124	1033.24	0.307643	1.23768	0.109082	2.8203	0.00479784	0.0334094	Usp15		ENSMUSG00000011305	485.697	-1.11473	0.461778	0.188952	-5.89954	3.65e-09	4.78e-07	Plin5
ENSMUSG00000006498	3525.56	0.30886	1.23873	0.0925495	3.33724	0.000846142	0.00910926	Ptbp1		ENSMUSG00000047250	174.262	-1.10544	0.464759	0.300906	-3.67372	0.000239043	0.00359276	Ptgs1
ENSMUSG00000041459	3739.28	0.309485	1.23927	0.0934925	3.31027	0.000932062	0.00979889	Tardbp		ENSMUSG00000097637	51.4526	-1.09791	0.467193	0.33367	-3.2904	0.00100045	0.0103437	4933417D19Rik
ENSMUSG00000025060	1712.15	0.309863	1.23959	0.0915237	3.3856	0.000710221	0.00801132	Slk		ENSMUSG00000026360	14122	-1.09401	0.468458	0.385799	-2.83569	0.00457268	0.0323026	Rgs2
ENSMUSG00000039662	1780.16	0.310141	1.23983	0.0844111	3.67418	0.000238617	0.00359276	Icmt		ENSMUSG00000026986	170.651	-1.0916	0.469239	0.314539	-3.47049	0.000519511	0.00632653	Hnmt
ENSMUSG00000040596	1183.68	0.310469	1.24011	0.0993971	3.12352	0.00178701	0.016258	Pogk		ENSMUSG00000064344	64.2711	-1.08972	0.469852	0.312866	-3.48303	0.000495766	0.00611849	NA
ENSMUSG00000072825	1191.64	0.310789	1.24039	0.0946393	3.28393	0.00102371	0.0105284	Cep170b		ENSMUSG00000086938	157.408	-1.08867	0.470195	0.222381	-4.89552	9.8e-07	4.65e-05	4930481A15Rik
ENSMUSG00000001440	4119.98	0.310963	1.24054	0.082347	3.77625	0.000159204	0.00263467	Kpnb1		ENSMUSG00000086034	49.2444	-1.08238	0.472249	0.332304	-3.2572	0.00112518	0.0113164	Gm15201
ENSMUSG00000034525	806.289	0.311473	1.24097	0.11131	2.79824	0.00513815	0.0350904	Ice1		ENSMUSG00000060586	2468.27	-1.08112	0.472662	0.162904	-6.63654	3.21e-11	1e-08	H2-Eb1
ENSMUSG00000063511	2070.34	0.31154	1.24103	0.095743	3.25393	0.00113822	0.0114129	Snrnp70		ENSMUSG00000015243	3377.82	-1.07847	0.473532	0.163135	-6.61088	3.82e-11	1.12e-08	Abca1
ENSMUSG00000036450	811.691	0.312487	1.24185	0.10369	3.01367	0.00258112	0.0212086	Hif1an		ENSMUSG00000042961	99.7802	-1.06707	0.477286	0.315459	-3.3826	0.000718023	0.00806693	Egflam
ENSMUSG00000020430	1438.12	0.313075	1.24235	0.117461	2.66535	0.00769071	0.0471963	Pes1		ENSMUSG00000029449	59.3561	-1.06083	0.479357	0.356343	-2.97699	0.00291096	0.0231985	Rhof
ENSMUSG00000027624	1840.28	0.313392	1.24263	0.101467	3.08863	0.00201083	0.0177763	Epb41l1		ENSMUSG00000041842	66.2365	-1.05823	0.48022	0.297171	-3.56101	0.000369425	0.00488768	Fhdc1
ENSMUSG00000029701	864.184	0.314863	1.24389	0.10711	2.93962	0.00328618	0.0253853	Rbm28		ENSMUSG00000003484	79.1521	-1.05789	0.480333	0.309514	-3.41792	0.000631026	0.00736624	Cyp4f18
ENSMUSG00000035941	1655.91	0.314887	1.24391	0.08381	3.75715	0.000171859	0.00278326	Ibtk		ENSMUSG00000075410	313.116	-1.05455	0.481448	0.195251	-5.40099	6.63e-08	5.09e-06	Prcd
ENSMUSG00000026234	11467.1	0.316416	1.24523	0.0963125	3.2853	0.00101872	0.0104841	Ncl		ENSMUSG00000062585	64.0472	-1.04841	0.4835	0.336083	-3.1195	0.00181157	0.0164336	Cnr2
ENSMUSG00000035248	1495.96	0.317263	1.24596	0.0879827	3.60597	0.000310992	0.00431573	Zcchc6		ENSMUSG00000057058	133.758	-1.04717	0.483915	0.303836	-3.44651	0.000567871	0.00680476	Skap1
ENSMUSG00000029655	2066.59	0.317558	1.24622	0.104574	3.03669	0.00239195	0.0201419	N4bp2l2		ENSMUSG00000024866	362.343	-1.04489	0.484682	0.227214	-4.59871	4.25e-06	0.000153989	Acy3
ENSMUSG00000035311	728.969	0.317578	1.24624	0.107692	2.94894	0.00318863	0.0247501	Gnptab		ENSMUSG00000050157	44.7011	-1.03792	0.487029	0.380269	-2.72944	0.00634427	0.0409454	Gm867
ENSMUSG00000042699	2484.96	0.317709	1.24635	0.104608	3.03714	0.00238833	0.0201223	Dhx9		ENSMUSG00000021186	373.775	-1.03613	0.487634	0.219056	-4.72996	2.25e-06	9.25e-05	Fbln5
ENSMUSG00000047036	1842.85	0.318772	1.24727	0.085591	3.72436	0.000195811	0.00308476	Zfp445		ENSMUSG00000044122	215.473	-1.03266	0.488808	0.170491	-6.05696	1.39e-09	2.19e-07	Proca1
ENSMUSG00000028180	2437.97	0.318854	1.24734	0.108015	2.95196	0.00315766	0.0245627	Zranb2		ENSMUSG00000033998	1275.09	-1.02821	0.490318	0.185725	-5.53619	3.09e-08	2.74e-06	Kcnk1
ENSMUSG00000006134	599.176	0.319449	1.24785	0.118055	2.70593	0.00681133	0.0431744	Crkl		ENSMUSG00000025723	40.7253	-1.02814	0.490341	0.371067	-2.77078	0.00559227	0.0374064	Nmb
ENSMUSG00000059208	2489.46	0.320863	1.24908	0.0974827	3.29148	0.000996606	0.0103245	Hnrnpm		ENSMUSG00000022773	219.582	-1.02729	0.490632	0.185142	-5.54864	2.88e-08	2.61e-06	Ypel1
ENSMUSG00000056579	1959.4	0.321433	1.24957	0.0998044	3.22063	0.00127909	0.0124807	Tug1		ENSMUSG00000089809	157.552	-1.02648	0.490908	0.356813	-2.87679	0.00401737	0.0294456	A930011G23Rik
ENSMUSG00000050721	1796.36	0.321653	1.24976	0.115035	2.79613	0.00517179	0.0352124	Plekho2		ENSMUSG00000036594	2821.43	-1.02029	0.493018	0.159563	-6.39426	1.61e-10	3.6e-08	H2-Aa
ENSMUSG00000053289	680.312	0.321701	1.2498	0.119787	2.6856	0.00723994	0.045212	Ddx10		ENSMUSG00000024784	44.7505	-1.01788	0.493841	0.363637	-2.79917	0.00512341	0.0350358	Gpha2
ENSMUSG00000030662	2817.92	0.321751	1.24985	0.0981159	3.2793	0.00104065	0.0106746	Ipo5		ENSMUSG00000037709	267.19	-1.01538	0.494699	0.23276	-4.36233	1.29e-05	0.000362633	Fam13a
ENSMUSG00000022867	1667.08	0.322044	1.2501	0.0851525	3.78197	0.000155593	0.00260076	Usp25		ENSMUSG00000000253	240.76	-1.01202	0.495852	0.181479	-5.5765	2.45e-08	2.25e-06	Gmpr
ENSMUSG00000000001	6702.07	0.322628	1.25061	0.0932915	3.45828	0.000543634	0.00656397	Gnai3		ENSMUSG00000033192	131.377	-1.01123	0.496122	0.333867	-3.02885	0.00245483	0.0205165	Lpcat2
ENSMUSG00000009035	1723.41	0.323146	1.25106	0.112224	2.87947	0.0039835	0.0292523	Tmem184b		ENSMUSG00000024986	327.122	-1.0109	0.496237	0.266667	-3.79086	0.000150127	0.00253506	Hhex
ENSMUSG00000025616	1267.05	0.323241	1.25114	0.100948	3.20207	0.00136446	0.0131412	Usp16		ENSMUSG00000038173	87.0602	-1.00835	0.497116	0.330452	-3.05141	0.00227768	0.0194738	Enpp6
ENSMUSG00000025199	1951.57	0.323321	1.25121	0.0857356	3.77114	0.0001625	0.00267048	Chuk		ENSMUSG00000086742	239.192	-1.00737	0.497452	0.233342	-4.31715	1.58e-05	0.000433664	LOC102635948
ENSMUSG00000032030	1476.32	0.323877	1.25169	0.0885185	3.65886	0.000253335	0.00373472	Cul5		ENSMUSG00000030329	122.829	-1.00482	0.498332	0.256727	-3.91397	9.08e-05	0.00172518	Pianp
ENSMUSG00000024384	1013.84	0.324416	1.25216	0.105705	3.06908	0.00214722	0.0186858	Iws1		ENSMUSG00000034488	248.137	-0.997615	0.500827	0.295357	-3.37766	0.000731044	0.00818141	Edil3
ENSMUSG00000021188	1383.95	0.325223	1.25286	0.088624	3.6697	0.000242838	0.003621	Trip11		ENSMUSG00000060730	100.202	-0.99601	0.501385	0.288141	-3.45668	0.000546873	0.00659798	NA
ENSMUSG00000034075	1876.11	0.3254	1.25301	0.107601	3.02413	0.00249349	0.0207397	Zdhhc5		ENSMUSG00000030739	86.8652	-0.992989	0.502436	0.288117	-3.44648	0.000567935	0.00680476	Myh14
ENSMUSG00000005610	23265.4	0.325468	1.25307	0.0820116	3.96856	7.2309e-05	0.00144544	Eif4g2		ENSMUSG00000060807	54.0546	-0.987236	0.504443	0.349766	-2.82256	0.00476415	0.0332657	Serpina6
ENSMUSG00000015605	722.83	0.325726	1.2533	0.117135	2.78078	0.00542282	0.0365391	Srf		ENSMUSG00000029925	79.292	-0.984972	0.505235	0.304875	-3.23074	0.00123471	0.012147	Tbxas1
ENSMUSG00000021816	2311.39	0.326623	1.25407	0.0871892	3.74614	0.000179574	0.00289022	Ppp3cb		ENSMUSG00000051727	164.906	-0.982164	0.50622	0.280595	-3.50029	0.000464759	0.00582757	Kctd14
ENSMUSG00000030265	1836.09	0.327106	1.25449	0.0969122	3.37528	0.000737396	0.00824067	Kras		ENSMUSG00000030844	128.849	-0.982032	0.506266	0.270712	-3.62759	0.00028608	0.0040493	Rgs10
ENSMUSG00000024436	582.78	0.327401	1.25475	0.120453	2.71807	0.00656634	0.0420483	Mrps18b		ENSMUSG00000034936	138.963	-0.974623	0.508873	0.3239	-3.00902	0.00262089	0.0213779	Arl4d
ENSMUSG00000036202	817.151	0.327435	1.25478	0.108586	3.01544	0.00256607	0.0211295	Rif1		ENSMUSG00000036887	1013.42	-0.972216	0.509723	0.219618	-4.42685	9.56e-06	0.000283267	C1qa
ENSMUSG00000026466	2729.49	0.327982	1.25526	0.0910987	3.60029	0.000317857	0.00439538	Tor1aip1		ENSMUSG00000056481	124.601	-0.970632	0.510282	0.250094	-3.88107	0.000104	0.001899	Cd248
ENSMUSG00000030056	753.197	0.328071	1.25533	0.112311	2.92109	0.00348809	0.0266029	Isy1		ENSMUSG00000002985	5530	-0.96827	0.511119	0.122648	-7.89468	2.91e-15	4.54e-12	Apoe
ENSMUSG00000006307	889.192	0.328205	1.25545	0.11092	2.95894	0.00308702	0.0241941	Kmt2b		ENSMUSG00000071604	331.563	-0.964118	0.512592	0.261268	-3.69016	0.000224117	0.0034236	Fam189a2
ENSMUSG00000060923	762.266	0.329227	1.25634	0.116362	2.82932	0.00466464	0.0327956	Acyp2		ENSMUSG00000026489	1088.68	-0.96271	0.513092	0.1769	-5.4421	5.27e-08	4.26e-06	Coq8a
ENSMUSG00000051339	773.725	0.329493	1.25657	0.11741	2.80635	0.00501065	0.0345065	2900026A02Rik		ENSMUSG00000005836	2270.68	-0.959163	0.514355	0.135332	-7.08748	1.37e-12	7.11e-10	Gata6
ENSMUSG00000041408	3370.16	0.330362	1.25733	0.0902571	3.66023	0.000251985	0.00371833	Wapl		ENSMUSG00000034959	194.915	-0.958068	0.514746	0.290281	-3.30049	0.000965177	0.0100859	Rubcnl
ENSMUSG00000062627	702.927	0.330653	1.25758	0.12413	2.66377	0.00772712	0.0473082	Mysm1		ENSMUSG00000044694	641.085	-0.95798	0.514777	0.155909	-6.1445	8.02e-10	1.42e-07	NA
ENSMUSG00000029622	4132.39	0.330665	1.25759	0.11687	2.82935	0.00466425	0.0327956	Arpc1b		ENSMUSG00000018411	1057.86	-0.950321	0.517517	0.188818	-5.033	4.83e-07	2.69e-05	Mapt
ENSMUSG00000024359	22383.4	0.330877	1.25778	0.122951	2.69113	0.00712099	0.0447196	Hspa9		ENSMUSG00000062151	75.3622	-0.946317	0.518956	0.350115	-2.70288	0.00687421	0.043467	Unc13c
ENSMUSG00000038914	925.624	0.331828	1.25861	0.110131	3.01303	0.0025865	0.0212305	Dido1		ENSMUSG00000031700	853.753	-0.945726	0.519168	0.138516	-6.82754	8.64e-12	3.29e-09	Gpt2
ENSMUSG00000032803	1918.62	0.333304	1.2599	0.0978824	3.40515	0.000661269	0.00760776	Cdv3		ENSMUSG00000030688	2053.56	-0.945181	0.519364	0.141005	-6.70317	2.04e-11	6.77e-09	Stard10
ENSMUSG00000021706	599.993	0.333532	1.26009	0.116812	2.8553	0.00429959	0.0308906	Zfyve16		ENSMUSG00000039481	74.5193	-0.943467	0.519982	0.323871	-2.91309	0.00357868	0.0270952	Nrtn
ENSMUSG00000060450	2324.77	0.334585	1.26102	0.0944593	3.54211	0.000396936	0.00517275	Rnf14		ENSMUSG00000042379	1048.2	-0.941613	0.52065	0.242234	-3.88721	0.000101403	0.00186466	Esm1
ENSMUSG00000045427	1405.21	0.334699	1.26111	0.114883	2.91338	0.00357536	0.0270832	Hnrnph2		ENSMUSG00000031379	83.8189	-0.941064	0.520848	0.274517	-3.42807	0.000607888	0.00715712	Pir
ENSMUSG00000022770	2433.74	0.335214	1.26156	0.124718	2.68777	0.00719317	0.045028	Dlg1		ENSMUSG00000036432	462.031	-0.939234	0.52151	0.223835	-4.1961	2.72e-05	0.000674001	Siah2
ENSMUSG00000027852	1208.81	0.336364	1.26257	0.122619	2.74317	0.00608492	0.0396816	Nras		ENSMUSG00000033595	196.038	-0.936136	0.522631	0.267027	-3.50577	0.000455287	0.00574147	Lgi3
ENSMUSG00000021147	1212.53	0.336605	1.26278	0.118973	2.82926	0.00466558	0.0327956	Wdr37		ENSMUSG00000038217	159.218	-0.934269	0.523308	0.21307	-4.3848	1.16e-05	0.000331953	Tlcd2
ENSMUSG00000036550	2037.15	0.336921	1.26306	0.0871402	3.86642	0.000110445	0.00198648	Cnot1		ENSMUSG00000036611	611.088	-0.934158	0.523348	0.209633	-4.45617	8.34e-06	0.000256929	Eepd1
ENSMUSG00000021374	900.39	0.337542	1.2636	0.0983603	3.43169	0.000599826	0.00708893	Nup153		ENSMUSG00000057286	403.962	-0.926837	0.52601	0.193454	-4.79099	1.66e-06	7.16e-05	St6galnac2
ENSMUSG00000015461	1023.16	0.33766	1.26371	0.120339	2.80591	0.00501742	0.0345379	Atf6b		ENSMUSG00000096221	49.4198	-0.922795	0.527486	0.344284	-2.68033	0.00735489	0.0457651	NA
ENSMUSG00000019173	5185.64	0.337675	1.26372	0.120387	2.80491	0.00503312	0.0346002	Rab5c		ENSMUSG00000042675	1225.47	-0.921998	0.527777	0.111729	-8.25208	1.56e-16	3.84e-13	Ypel3
ENSMUSG00000042508	657.424	0.337769	1.2638	0.113798	2.96815	0.002996	0.0236626	Dmtf1		ENSMUSG00000042851	251.834	-0.91977	0.528593	0.188008	-4.8922	9.97e-07	4.7e-05	Zc3h6
ENSMUSG00000041264	828.432	0.33841	1.26436	0.127583	2.65247	0.00799048	0.0483517	Uspl1		ENSMUSG00000099655	50.1936	-0.917974	0.529252	0.331774	-2.76687	0.00565981	0.0377128	NA
ENSMUSG00000070348	6058.05	0.339904	1.26567	0.0853802	3.98107	6.8606e-05	0.0013892	Ccnd1		ENSMUSG00000093577	91.3175	-0.916885	0.529652	0.262773	-3.48926	0.000484352	0.00602526	NA
ENSMUSG00000037029	697.09	0.339937	1.2657	0.113864	2.98546	0.00283151	0.0226231	Zfp146		ENSMUSG00000110185	778.694	-0.905385	0.53389	0.185713	-4.87517	1.09e-06	5.01e-05	Igip
ENSMUSG00000025869	1521.06	0.339975	1.26573	0.111362	3.05287	0.00226663	0.0194049	Nop16		ENSMUSG00000050234	95.2938	-0.904989	0.534037	0.288362	-3.13838	0.00169883	0.0156105	Gja4
ENSMUSG00000029823	3310.5	0.34026	1.26598	0.0841756	4.04226	5.29391e-05	0.00113217	Luc7l2		ENSMUSG00000081926	100.282	-0.904847	0.534089	0.265973	-3.40202	0.000668899	0.00767293	NA
ENSMUSG00000026491	1396.71	0.340947	1.26659	0.11032	3.09052	0.00199807	0.0177037	Ahctf1		ENSMUSG00000022546	90.7965	-0.903465	0.534601	0.251928	-3.58621	0.000335519	0.00457478	Gpt
ENSMUSG00000030655	1660.98	0.341317	1.26691	0.117302	2.90974	0.00361728	0.0272909	Smg1		ENSMUSG00000100594	91.4336	-0.902355	0.535013	0.285866	-3.15657	0.00159636	0.0149452	2810414N06Rik
ENSMUSG00000032560	1121.64	0.342432	1.26789	0.112879	3.03361	0.0024165	0.0203157	Dnajc13		ENSMUSG00000001948	97.6258	-0.901459	0.535345	0.289547	-3.11334	0.0018498	0.0167221	Spa17
ENSMUSG00000021279	2605.88	0.342523	1.26797	0.0844639	4.05526	5.00776e-05	0.00109192	Cdc42bpb		ENSMUSG00000038605	602.91	-0.90131	0.5354	0.176729	-5.09997	3.4e-07	2.01e-05	Samd10
ENSMUSG00000020325	1431.95	0.342626	1.26806	0.129169	2.65253	0.007989	0.0483517	Fstl3		ENSMUSG00000031351	74.7378	-0.898938	0.536281	0.32622	-2.75562	0.00585808	0.0385936	Zfp185
ENSMUSG00000034610	517.49	0.342741	1.26816	0.126416	2.71121	0.00670382	0.0426661	Zcchc11		ENSMUSG00000025401	229.392	-0.898314	0.536513	0.238545	-3.7658	0.000166016	0.00271682	Myo1a
ENSMUSG00000041781	1795.37	0.342763	1.26818	0.0972003	3.52635	0.000421322	0.00540483	Cpsf2		ENSMUSG00000063714	88.5933	-0.895737	0.537473	0.25554	-3.50526	0.000456154	0.00574777	NA
ENSMUSG00000039630	2279.17	0.343043	1.26843	0.12095	2.83623	0.00456495	0.0322772	Hnrnpu		ENSMUSG00000085316	227.081	-0.89236	0.538732	0.232112	-3.84453	0.000120783	0.00213793	D330050G23Rik
ENSMUSG00000040620	819.407	0.343664	1.26898	0.106456	3.22823	0.00124561	0.0122074	Dhx33		ENSMUSG00000033429	425.709	-0.892033	0.538854	0.152498	-5.84947	4.93e-09	6.16e-07	Mcee
ENSMUSG00000022710	2279.76	0.343882	1.26917	0.0853355	4.02977	5.58319e-05	0.0011795	Usp7		ENSMUSG00000030711	349.159	-0.884335	0.541737	0.255678	-3.45879	0.000542612	0.00656178	Sult1a1
ENSMUSG00000031278	22738.3	0.344163	1.26941	0.117949	2.91789	0.00352404	0.0267855	Acsl4		ENSMUSG00000063838	434.185	-0.883555	0.54203	0.153483	-5.75671	8.58e-09	9.7e-07	Cdc42ep5
ENSMUSG00000038467	6440.87	0.345089	1.27023	0.119764	2.8814	0.0039591	0.0291692	Chmp4b		ENSMUSG00000036896	850.148	-0.881051	0.542972	0.185258	-4.75581	1.98e-06	8.29e-05	C1qc
ENSMUSG00000026131	2412.71	0.345522	1.27061	0.0923443	3.74167	0.000182802	0.00292872	Dst		ENSMUSG00000026649	78.3032	-0.880033	0.543355	0.304033	-2.89453	0.00379724	0.0283307	Cfap126
ENSMUSG00000040659	1102.88	0.345931	1.27097	0.128212	2.69811	0.00697338	0.0439873	Efhd2		ENSMUSG00000070858	290.109	-0.879601	0.543518	0.154426	-5.69593	1.23e-08	1.29e-06	Gm1673
ENSMUSG00000034154	648.38	0.346162	1.27117	0.116218	2.97856	0.00289607	0.0231035	Ino80		ENSMUSG00000022747	145.207	-0.879055	0.543724	0.233717	-3.76119	0.000169105	0.00275123	St3gal6
ENSMUSG00000028430	1285	0.34672	1.27167	0.110644	3.13367	0.00172635	0.0158075	Nol6		ENSMUSG00000105703	348.562	-0.878952	0.543762	0.273497	-3.21376	0.00131009	0.0127434	NA
ENSMUSG00000022016	1355.49	0.347385	1.27225	0.100648	3.4515	0.000557477	0.00671036	Akap11		ENSMUSG00000024036	195.554	-0.878495	0.543935	0.183653	-4.78345	1.72e-06	7.35e-05	Slc37a1
ENSMUSG00000036698	1194.77	0.348712	1.27342	0.105937	3.29171	0.00099581	0.0103231	Ago2		ENSMUSG00000034614	428.253	-0.87544	0.545088	0.159595	-5.48537	4.13e-08	3.5e-06	Pik3ip1
ENSMUSG00000042350	1050.7	0.348839	1.27354	0.102785	3.39386	0.000689142	0.00783605	Arel1		ENSMUSG00000001665	178.649	-0.875019	0.545247	0.186997	-4.67932	2.88e-06	0.000113472	Gstt3
ENSMUSG00000007029	1185.41	0.349148	1.27381	0.132172	2.64163	0.0082509	0.0495528	Vars		ENSMUSG00000010307	2859.79	-0.873717	0.545739	0.132532	-6.5925	4.32e-11	1.19e-08	Tmem86a
ENSMUSG00000019432	2572.44	0.349708	1.2743	0.0928292	3.76722	0.000165075	0.00270709	Ddx39b		ENSMUSG00000022323	394.899	-0.869251	0.547431	0.204727	-4.24591	2.18e-05	0.000561792	Rida
ENSMUSG00000041747	614.902	0.350261	1.27479	0.119987	2.91916	0.00350977	0.0267421	Utp15		ENSMUSG00000003824	71.2518	-0.868845	0.547585	0.305944	-2.83988	0.00451299	0.0320842	Syce2
ENSMUSG00000030469	463.48	0.350516	1.27502	0.126699	2.76652	0.00566573	0.0377206	Zfp719		ENSMUSG00000021947	197.805	-0.867865	0.547957	0.228142	-3.80405	0.000142347	0.00242611	Cryl1
ENSMUSG00000039512	652.245	0.350746	1.27522	0.131264	2.67206	0.00753869	0.0465377	Uhrf1bp1		ENSMUSG00000020102	136.18	-0.865955	0.548683	0.224078	-3.86453	0.000111303	0.00199732	Slc16a7
ENSMUSG00000030707	590.408	0.351251	1.27567	0.127817	2.74808	0.0059946	0.039158	Coro1a		ENSMUSG00000062296	6013.24	-0.86406	0.549404	0.162865	-5.30539	1.12e-07	7.84e-06	Trank1
ENSMUSG00000021428	591.912	0.352582	1.27684	0.117907	2.99033	0.00278674	0.0223628	Riok1		ENSMUSG00000032348	932.669	-0.862597	0.549962	0.17631	-4.89251	9.96e-07	4.7e-05	Gsta4
ENSMUSG00000049164	768.522	0.352794	1.27703	0.102898	3.42858	0.000606754	0.00714916	Zfp518a		ENSMUSG00000031790	124.761	-0.860883	0.550615	0.216772	-3.97138	7.15e-05	0.00143027	Mmp15
ENSMUSG00000029068	1665.08	0.353129	1.27733	0.0973645	3.62688	0.000286866	0.00405665	Ccnl2		ENSMUSG00000028088	268.563	-0.859328	0.551209	0.212891	-4.03648	5.43e-05	0.0011541	Fmo5
ENSMUSG00000019970	2968.48	0.353572	1.27772	0.130541	2.7085	0.00675879	0.0428936	Sgk1		ENSMUSG00000017969	1821.71	-0.858436	0.55155	0.161931	-5.30126	1.15e-07	7.98e-06	Ptgis
ENSMUSG00000057469	728.537	0.353587	1.27773	0.116785	3.02768	0.00246435	0.020574	E2f6		ENSMUSG00000003279	1662.54	-0.857628	0.551859	0.203522	-4.21392	2.51e-05	0.000629939	Dlgap1
ENSMUSG00000026377	1492.64	0.353654	1.27779	0.122276	2.89227	0.00382467	0.0284743	Nifk		ENSMUSG00000024593	100.426	-0.857204	0.552022	0.304454	-2.81554	0.00486954	0.0337731	Megf10
ENSMUSG00000028292	591.362	0.353739	1.27787	0.132669	2.66634	0.00766832	0.0471145	Rars2		ENSMUSG00000048965	115.937	-0.853562	0.553417	0.305088	-2.79776	0.00514581	0.0351098	Mrgpre
ENSMUSG00000021710	597.439	0.354252	1.27832	0.129831	2.72855	0.00636128	0.0410043	Nln		ENSMUSG00000028766	168.19	-0.852708	0.553744	0.241956	-3.52423	0.000424722	0.0054395	Alpl
ENSMUSG00000030304	1379.8	0.355057	1.27904	0.0969594	3.66191	0.000250338	0.00370804	Ergic2		ENSMUSG00000067818	292.241	-0.851636	0.554156	0.227947	-3.73611	0.00018689	0.00297451	Myl9
ENSMUSG00000039826	701.649	0.355726	1.27963	0.125772	2.82833	0.00467916	0.0328722	Trub2		ENSMUSG00000028488	739.605	-0.851021	0.554392	0.12489	-6.81416	9.48e-12	3.52e-09	Sh3gl2
ENSMUSG00000001707	925.036	0.355982	1.27986	0.126352	2.81738	0.00484174	0.0336401	Eef1e1		ENSMUSG00000036390	462.238	-0.849612	0.554934	0.277532	-3.06131	0.00220373	0.0189945	Gadd45a
ENSMUSG00000034543	1229.16	0.35666	1.28046	0.106104	3.36143	0.000775399	0.00852665	Morc2a		ENSMUSG00000032281	11688.3	-0.847159	0.555878	0.122915	-6.89222	5.49e-12	2.32e-09	Acsbg1
ENSMUSG00000005580	706.096	0.356749	1.28054	0.121747	2.93025	0.00338685	0.026043	Adcy9		ENSMUSG00000085645	308.699	-0.846279	0.556217	0.240294	-3.52184	0.000428557	0.00547963	Hoxb5os
ENSMUSG00000003348	373.16	0.357056	1.28081	0.1337	2.67057	0.0075722	0.0466893	Mob3a		ENSMUSG00000040740	73.48	-0.843254	0.557385	0.310977	-2.71162	0.00669547	0.0426304	Slc25a34
ENSMUSG00000045983	6945.41	0.357444	1.28115	0.0819488	4.3618	1.28996e-05	0.000362861	Eif4g1		ENSMUSG00000025933	219.597	-0.841223	0.55817	0.189817	-4.43175	9.35e-06	0.000279025	Tmem14a
ENSMUSG00000008604	1247.75	0.357785	1.28146	0.0981344	3.64587	0.000266493	0.00385945	Ubqln4		ENSMUSG00000031808	2257.57	-0.83931	0.558911	0.131727	-6.37156	1.87e-10	4.06e-08	Slc27a1
ENSMUSG00000030352	1168.48	0.358134	1.28177	0.120576	2.9702	0.0029761	0.0235713	Tspan9		ENSMUSG00000047777	609.234	-0.833938	0.560996	0.146416	-5.69568	1.23e-08	1.29e-06	Phf13
ENSMUSG00000024276	799.484	0.358546	1.28213	0.111789	3.20734	0.00133966	0.0129687	Zfp397		ENSMUSG00000064373	4138.36	-0.833455	0.561184	0.182692	-4.56207	5.07e-06	0.000175726	Selenop
ENSMUSG00000049658	643.603	0.358734	1.2823	0.107484	3.33757	0.000845148	0.0091059	Bdp1		ENSMUSG00000031169	147.592	-0.833364	0.561219	0.21756	-3.83051	0.000127879	0.00223566	Porcn
ENSMUSG00000056952	933.132	0.359123	1.28265	0.119085	3.01569	0.00256394	0.0211231	Tatdn2		ENSMUSG00000013083	80.0767	-0.832143	0.561694	0.306767	-2.71262	0.00667535	0.0425369	2200002J24Rik
ENSMUSG00000000787	11079.5	0.35961	1.28308	0.1058	3.39897	0.0006764	0.00773076	Ddx3x		ENSMUSG00000086968	114.132	-0.831424	0.561974	0.261948	-3.17401	0.00150351	0.0142259	4933431E20Rik
ENSMUSG00000030522	802.295	0.360153	1.28356	0.125663	2.86603	0.00415656	0.0301655	Mtmr10		ENSMUSG00000042647	336.659	-0.828726	0.563026	0.185354	-4.47104	7.78e-06	0.000244024	Acad10
ENSMUSG00000020290	2310.83	0.36116	1.28446	0.103593	3.48634	0.000489669	0.00607862	Xpo1		ENSMUSG00000043644	62.2346	-0.828248	0.563213	0.313047	-2.64576	0.00815071	0.049093	0610009L18Rik
ENSMUSG00000021458	636.428	0.36216	1.28535	0.120462	3.00643	0.00264336	0.0214938	2010111I01Rik		ENSMUSG00000023942	1672.35	-0.827711	0.563423	0.132505	-6.24666	4.19e-10	7.89e-08	Slc29a1
ENSMUSG00000020255	982.309	0.363069	1.28616	0.116247	3.12325	0.00178866	0.0162595	D10Wsu102e		ENSMUSG00000022676	98.8455	-0.826406	0.563932	0.251266	-3.28897	0.00100553	0.0103645	Snai2
ENSMUSG00000032328	8661.21	0.363267	1.28634	0.0906391	4.00784	6.12765e-05	0.00126541	Tmem30a		ENSMUSG00000042724	295.689	-0.825265	0.564379	0.221742	-3.72174	0.000197857	0.00310289	Map3k9
ENSMUSG00000032409	642.484	0.364152	1.28713	0.117215	3.10671	0.00189182	0.0170133	Atr		ENSMUSG00000054612	122.705	-0.819396	0.566679	0.248637	-3.29556	0.000982264	0.0102195	Mgmt
ENSMUSG00000014932	1719.69	0.364886	1.28778	0.127319	2.86591	0.0041581	0.0301655	Yes1		ENSMUSG00000034845	2880.73	-0.819243	0.566739	0.137488	-5.95865	2.54e-09	3.61e-07	Plvap
ENSMUSG00000055065	4615.8	0.364911	1.2878	0.0920637	3.96368	7.38041e-05	0.00146781	Ddx17		ENSMUSG00000007872	1062.53	-0.816568	0.567791	0.206769	-3.94918	7.84e-05	0.00153384	Id3
ENSMUSG00000032806	489.263	0.365253	1.28811	0.134507	2.71549	0.00661777	0.0422909	Slc10a3		ENSMUSG00000045031	208.537	-0.81643	0.567845	0.178885	-4.56399	5.02e-06	0.000174516	Cetn4
ENSMUSG00000029471	882.919	0.365573	1.28839	0.118628	3.08168	0.00205837	0.018084	Camkk2		ENSMUSG00000039496	94.549	-0.816226	0.567926	0.289022	-2.8241	0.00474136	0.033164	Cdnf
ENSMUSG00000029174	516.549	0.365581	1.2884	0.134275	2.72264	0.00647628	0.0415376	Tbc1d1		ENSMUSG00000091811	606.688	-0.815818	0.568086	0.125184	-6.51693	7.18e-11	1.78e-08	Inafm1
ENSMUSG00000031078	6054.13	0.366907	1.28959	0.114367	3.20816	0.00133585	0.0129536	Cttn		ENSMUSG00000021665	869.045	-0.814265	0.568698	0.181497	-4.48638	7.24e-06	0.000230818	Hexb
ENSMUSG00000062014	6818.02	0.367273	1.28991	0.102632	3.57855	0.000345511	0.00465656	Gmfb		ENSMUSG00000056091	9589.6	-0.808561	0.570951	0.199449	-4.05398	5.04e-05	0.00109334	St3gal5
ENSMUSG00000022623	823.771	0.367618	1.29022	0.133415	2.75546	0.00586104	0.0385936	Shank3		ENSMUSG00000035944	547.283	-0.808066	0.571147	0.154649	-5.22515	1.74e-07	1.15e-05	Ttc38
ENSMUSG00000018433	719.399	0.368033	1.29059	0.121167	3.0374	0.00238626	0.0201223	Nol11		ENSMUSG00000070873	118.596	-0.806809	0.571645	0.245135	-3.29129	0.000997284	0.0103247	Lilra5
ENSMUSG00000066640	341.25	0.368268	1.2908	0.138224	2.66428	0.00771543	0.0472922	Fbxl18		ENSMUSG00000036570	513.745	-0.805914	0.572	0.213209	-3.77992	0.00015688	0.00261389	Fxyd1
ENSMUSG00000025816	514.958	0.368284	1.29082	0.118356	3.11166	0.0018604	0.0167694	Sec61a2		ENSMUSG00000047246	90.2293	-0.803985	0.572765	0.279571	-2.87578	0.00403031	0.0295123	Hist1h2be
ENSMUSG00000030084	1764.28	0.368727	1.29121	0.0931925	3.95661	7.60202e-05	0.00149852	Plxna1		ENSMUSG00000036867	185.283	-0.802821	0.573227	0.298186	-2.69235	0.00709504	0.0445745	Smad6
ENSMUSG00000024498	1156.43	0.369351	1.29177	0.101438	3.64116	0.000271415	0.00390897	Tcerg1		ENSMUSG00000037649	201.606	-0.80136	0.573808	0.188551	-4.25011	2.14e-05	0.000552281	H2-DMa
ENSMUSG00000024122	1597.37	0.36975	1.29213	0.0956955	3.86382	0.000111629	0.00200087	Pdpk1		ENSMUSG00000045287	3129.99	-0.800588	0.574115	0.122343	-6.54379	6e-11	1.59e-08	Rtn4rl1
ENSMUSG00000028901	365.371	0.37112	1.29336	0.139374	2.66277	0.00774999	0.0473738	Gmeb1		ENSMUSG00000006344	205.734	-0.800074	0.57432	0.229688	-3.48331	0.000495251	0.00611697	Ggt5
ENSMUSG00000026754	640.578	0.372033	1.29418	0.127139	2.92618	0.00343149	0.0262997	Golga1		ENSMUSG00000042834	228.067	-0.796519	0.575737	0.208037	-3.82874	0.000128802	0.00224569	Nrep
ENSMUSG00000059796	9407.62	0.372744	1.29481	0.107591	3.46446	0.000531291	0.00643984	Eif4a1		ENSMUSG00000050578	134.226	-0.795139	0.576288	0.222189	-3.57866	0.000345367	0.00465656	Mmp13
ENSMUSG00000030718	1112.18	0.372883	1.29494	0.123962	3.00803	0.00262945	0.0214142	Ppme1		ENSMUSG00000023070	108.89	-0.794888	0.576388	0.252913	-3.14293	0.00167263	0.0154607	Rgn
ENSMUSG00000009535	1033.21	0.372959	1.29501	0.108385	3.44106	0.000579434	0.00692129	Rnmt		ENSMUSG00000027487	284.376	-0.793761	0.576838	0.19108	-4.15408	3.27e-05	0.000788071	Cdk5rap1
ENSMUSG00000041130	776.285	0.373345	1.29535	0.130795	2.85443	0.00431142	0.0309613	Zfp598		ENSMUSG00000037493	243.731	-0.793353	0.577002	0.202067	-3.92619	8.63e-05	0.00165322	Cib2
ENSMUSG00000070738	873.24	0.373405	1.29541	0.117376	3.18128	0.00146625	0.0139495	Dgkd		ENSMUSG00000032420	376.919	-0.791932	0.57757	0.20151	-3.92998	8.5e-05	0.00163738	Nt5e
ENSMUSG00000022043	5919.52	0.373442	1.29544	0.0959883	3.8905	0.000100039	0.0018483	Trim35		ENSMUSG00000050666	840.952	-0.791394	0.577786	0.165658	-4.77727	1.78e-06	7.56e-05	Vstm4
ENSMUSG00000019814	976.697	0.373681	1.29565	0.101762	3.6721	0.000240569	0.00360784	Ltv1		ENSMUSG00000087165	120.126	-0.790955	0.577961	0.286854	-2.75735	0.00582725	0.038451	2010001A14Rik
ENSMUSG00000015176	1190.94	0.373847	1.2958	0.114233	3.27267	0.00106537	0.0108639	Nolc1		ENSMUSG00000047617	384.39	-0.790226	0.578253	0.153448	-5.1498	2.61e-07	1.6e-05	Paxx
ENSMUSG00000049804	563.543	0.374838	1.29669	0.128941	2.90705	0.00364853	0.0274537	Armcx4		ENSMUSG00000034171	158.314	-0.789826	0.578414	0.191489	-4.12466	3.71e-05	0.000874281	Faah
ENSMUSG00000066232	3057.39	0.375178	1.297	0.0879727	4.26471	2.0016e-05	0.00052431	Ipo7		ENSMUSG00000031966	139.731	-0.788549	0.578926	0.24764	-3.18425	0.00145128	0.0138493	Glb1l3
ENSMUSG00000061589	701.559	0.375236	1.29705	0.114902	3.26572	0.00109188	0.0110547	Dot1l		ENSMUSG00000001663	564.192	-0.787388	0.579392	0.159648	-4.93203	8.14e-07	4.02e-05	Gstt1
ENSMUSG00000022704	378.391	0.375796	1.29756	0.13532	2.7771	0.00548462	0.0368951	Qtrt2		ENSMUSG00000017466	2916.16	-0.783961	0.58077	0.182705	-4.29086	1.78e-05	0.000477079	Timp2
ENSMUSG00000046434	2783.29	0.37589	1.29764	0.120822	3.11112	0.00186381	0.0167904	Hnrnpa1		ENSMUSG00000002475	2288.46	-0.781595	0.581723	0.137367	-5.68982	1.27e-08	1.32e-06	Abhd3
ENSMUSG00000066150	1256.11	0.376129	1.29786	0.10594	3.55041	0.000384626	0.00502492	Slc31a1		ENSMUSG00000029096	1104.6	-0.780888	0.582008	0.128054	-6.0981	1.07e-09	1.78e-07	Htra3
ENSMUSG00000037364	1103.49	0.376312	1.29802	0.1225	3.07194	0.00212672	0.0185731	Srrt		ENSMUSG00000066152	1811.23	-0.780715	0.582078	0.118433	-6.59202	4.34e-11	1.19e-08	Slc31a2
ENSMUSG00000063362	1037.38	0.377385	1.29899	0.116825	3.23035	0.0012364	0.012147	Alg11		ENSMUSG00000021886	86.9924	-0.779731	0.582475	0.29391	-2.65296	0.007979	0.0483517	Gpr65
ENSMUSG00000022272	1813.24	0.378059	1.29959	0.118742	3.18386	0.00145326	0.0138597	Myo10		ENSMUSG00000111080	857.281	-0.779074	0.582741	0.189167	-4.11845	3.81e-05	0.000891394	Gm20300
ENSMUSG00000040459	1836.57	0.378323	1.29983	0.106013	3.56863	0.000358849	0.00478016	Arglu1		ENSMUSG00000059498	280.319	-0.778661	0.582908	0.221652	-3.51298	0.000443105	0.00562876	Fcgr3
ENSMUSG00000020541	1304.66	0.379405	1.30081	0.131632	2.88232	0.00394761	0.0291238	Tom1l1		ENSMUSG00000027160	418.568	-0.778421	0.583004	0.156361	-4.97836	6.41e-07	3.36e-05	Ccdc34
ENSMUSG00000030759	1628	0.37969	1.30106	0.101651	3.73521	0.000187558	0.00298182	Far1		ENSMUSG00000018566	353.412	-0.778113	0.583129	0.277109	-2.80797	0.00498549	0.0343635	Slc2a4
ENSMUSG00000026319	762.073	0.379735	1.3011	0.111194	3.41508	0.00063764	0.00740829	2310035C23Rik		ENSMUSG00000022528	565.775	-0.777913	0.58321	0.171955	-4.52395	6.07e-06	0.000200763	Hes1
ENSMUSG00000028060	889.493	0.379908	1.30126	0.112033	3.39102	0.000696323	0.00789465	2810403A07Rik		ENSMUSG00000079547	176.241	-0.776153	0.583922	0.250631	-3.09679	0.00195627	0.0174124	H2-DMb1
ENSMUSG00000022752	3494.86	0.38018	1.3015	0.0978392	3.88576	0.000102009	0.0018714	Tomm70a		ENSMUSG00000020593	640.576	-0.775382	0.584234	0.222147	-3.4904	0.000482289	0.00600439	Lpin1
ENSMUSG00000012296	444.964	0.38041	1.30171	0.137818	2.76024	0.00577598	0.0382126	Tjap1		ENSMUSG00000028737	1170.12	-0.773283	0.585084	0.127168	-6.0808	1.2e-09	1.93e-07	Aldh4a1
ENSMUSG00000025225	758.597	0.380425	1.30173	0.120431	3.15887	0.00158382	0.0148597	Nfkb2		ENSMUSG00000048040	175.175	-0.772819	0.585273	0.267455	-2.88953	0.00385817	0.0286282	Arxes2
ENSMUSG00000024937	862.779	0.380433	1.30173	0.119258	3.18999	0.00142275	0.0136187	Ehbp1l1		ENSMUSG00000029699	85.1678	-0.772322	0.585474	0.292504	-2.64038	0.00828127	0.0496304	Ssc4d
ENSMUSG00000015656	14313.2	0.38052	1.30181	0.128872	2.95269	0.00315017	0.0245412	Hspa8		ENSMUSG00000021496	449.637	-0.771564	0.585782	0.137129	-5.62654	1.84e-08	1.77e-06	Pcbd2
ENSMUSG00000050199	5160.68	0.380914	1.30217	0.132702	2.87046	0.00409876	0.029846	Lgr4		ENSMUSG00000043496	174.788	-0.771165	0.585944	0.247784	-3.11225	0.00185668	0.0167552	Tril
ENSMUSG00000027185	608.521	0.381106	1.30234	0.129632	2.93991	0.00328305	0.0253737	Nat10		ENSMUSG00000038967	890.361	-0.770422	0.586246	0.137059	-5.62111	1.9e-08	1.82e-06	Pdk2
ENSMUSG00000064145	976.815	0.381303	1.30252	0.100941	3.77748	0.000158426	0.00262843	Arih2		ENSMUSG00000031431	1228.76	-0.770421	0.586246	0.142235	-5.41655	6.08e-08	4.77e-06	Tsc22d3
ENSMUSG00000042211	1084.21	0.38143	1.30263	0.0965906	3.94893	7.84999e-05	0.00153384	Fbxo38		ENSMUSG00000042510	385.461	-0.768379	0.587077	0.245991	-3.1236	0.00178651	0.016258	AA986860
ENSMUSG00000051451	1046.49	0.382163	1.30329	0.11776	3.24527	0.00117341	0.0116683	Crebzf		ENSMUSG00000019732	84.7466	-0.767682	0.58736	0.278057	-2.76088	0.00576459	0.0381666	Calr3
ENSMUSG00000022500	1475.76	0.382489	1.30359	0.140879	2.71502	0.00662722	0.0423166	Litaf		ENSMUSG00000031380	802.889	-0.767669	0.587366	0.171982	-4.46365	8.06e-06	0.000251083	Vegfd
ENSMUSG00000052214	1150.12	0.382831	1.3039	0.114903	3.33177	0.000862947	0.00921702	Opa3		ENSMUSG00000035473	145.889	-0.766644	0.587783	0.237829	-3.22351	0.00126628	0.0123867	Galm
ENSMUSG00000034560	1389.73	0.383536	1.30454	0.107667	3.56225	0.000367686	0.00487293	Washc4		ENSMUSG00000033863	1919.38	-0.766572	0.587813	0.166998	-4.5903	4.43e-06	0.000157826	Klf9
ENSMUSG00000041415	1036.78	0.383687	1.30467	0.102036	3.76032	0.000169696	0.00275681	Dicer1		ENSMUSG00000074218	211.288	-0.761992	0.589682	0.172223	-4.42444	9.67e-06	0.000285366	Cox7a1
ENSMUSG00000029101	286.372	0.38452	1.30543	0.144858	2.65446	0.00794347	0.048198	Rgs12		ENSMUSG00000061353	827.803	-0.761596	0.589844	0.210526	-3.61759	0.000297361	0.00417482	Cxcl12
ENSMUSG00000040687	427.04	0.38461	1.30551	0.143791	2.67479	0.00747767	0.0462822	Madd		ENSMUSG00000070806	118.903	-0.760289	0.590378	0.22787	-3.3365	0.000848412	0.00911591	Zmynd12
ENSMUSG00000036273	593.356	0.385008	1.30587	0.132372	2.90853	0.00363127	0.0273607	Lrrk2		ENSMUSG00000037406	233.108	-0.757957	0.591333	0.188251	-4.02632	5.67e-05	0.00119049	Htra4
ENSMUSG00000025364	2483.03	0.38554	1.30635	0.111638	3.45349	0.00055339	0.00667145	Pa2g4		ENSMUSG00000054934	89.1269	-0.75779	0.591401	0.26689	-2.83933	0.0045208	0.0320966	Kcnmb4
ENSMUSG00000024404	2277.04	0.38555	1.30636	0.0810016	4.75978	1.93801e-06	8.17735e-05	Riok3		ENSMUSG00000029162	658.486	-0.757024	0.591716	0.154494	-4.90001	9.58e-07	4.56e-05	Khk
ENSMUSG00000014496	517.341	0.386188	1.30694	0.127129	3.03776	0.00238344	0.0201223	Ankrd28		ENSMUSG00000064342	307.335	-0.755042	0.592529	0.211629	-3.56777	0.000360034	0.00478777	NA
ENSMUSG00000029036	1263.01	0.386222	1.30697	0.11834	3.26366	0.00109985	0.011121	Atad3a		ENSMUSG00000020810	914.389	-0.753341	0.593228	0.169757	-4.43777	9.09e-06	0.000274431	Cygb
ENSMUSG00000054280	668.528	0.386375	1.3071	0.127486	3.03073	0.00243964	0.0204114	Prr14l		ENSMUSG00000039246	302.348	-0.751894	0.593824	0.220929	-3.40333	0.000665691	0.00764174	Lyplal1
ENSMUSG00000024293	588.443	0.387082	1.30775	0.11277	3.43248	0.000598097	0.00708082	Esco1		ENSMUSG00000049422	6775.6	-0.750555	0.594375	0.0791195	-9.48635	2.39e-21	3.74e-17	Chchd10
ENSMUSG00000002017	769.868	0.38719	1.30784	0.126185	3.06843	0.00215186	0.0186976	Fam98a		ENSMUSG00000040997	17119.1	-0.748261	0.595321	0.122235	-6.1215	9.27e-10	1.59e-07	Abhd4
ENSMUSG00000010936	505.959	0.387484	1.30811	0.131909	2.9375	0.00330871	0.0255341	Vac14		ENSMUSG00000030905	271.005	-0.747865	0.595484	0.221751	-3.37255	0.000744757	0.00830511	Crym
ENSMUSG00000036501	746.714	0.388143	1.30871	0.116935	3.31929	0.000902458	0.00954552	Fam13b		ENSMUSG00000019734	179.928	-0.746956	0.595859	0.197048	-3.79074	0.000150201	0.00253506	Tmc4
ENSMUSG00000027435	1436.62	0.388541	1.30907	0.119521	3.25082	0.00115072	0.0115087	Cd93		ENSMUSG00000001864	1014.99	-0.743838	0.597149	0.197086	-3.77417	0.00016054	0.00264662	Aif1l
ENSMUSG00000025743	14406.7	0.389656	1.31008	0.106888	3.64546	0.000266914	0.00386197	Sdc3		ENSMUSG00000029311	1453.26	-0.743464	0.597304	0.127846	-5.81532	6.05e-09	7.16e-07	Hsd17b11
ENSMUSG00000005442	1349.86	0.39066	1.31099	0.104446	3.7403	0.000183799	0.00294003	Cic		ENSMUSG00000056185	202.763	-0.739774	0.598833	0.227899	-3.24606	0.00117015	0.0116433	Snx32
ENSMUSG00000025047	698.562	0.390987	1.31129	0.117344	3.33198	0.000862291	0.00921702	Pdcd11		ENSMUSG00000000486	91.1039	-0.738917	0.599189	0.257081	-2.87426	0.00404974	0.0295995	2020-09-01
ENSMUSG00000032480	1346.58	0.392382	1.31256	0.112843	3.47723	0.000506632	0.00621819	Dhx30		ENSMUSG00000074800	139.027	-0.737504	0.599776	0.229982	-3.20679	0.00134227	0.0129687	NA
ENSMUSG00000079215	1504.75	0.393699	1.31376	0.0944429	4.16864	3.06424e-05	0.000748653	Zfp664		ENSMUSG00000043510	186.648	-0.733616	0.601395	0.187761	-3.90719	9.34e-05	0.00175946	Hscb
ENSMUSG00000039831	1404.01	0.395513	1.31541	0.108468	3.64635	0.00026599	0.00385933	Arhgap29		ENSMUSG00000061740	271.801	-0.730948	0.602508	0.229705	-3.18212	0.00146201	0.0139261	Cyp2d22
ENSMUSG00000060098	799.809	0.395559	1.31545	0.136417	2.89962	0.00373611	0.0279885	Prmt7		ENSMUSG00000043664	353.668	-0.730451	0.602716	0.164918	-4.42918	9.46e-06	0.00028129	Tmem221
ENSMUSG00000057406	1062.24	0.395666	1.31555	0.100618	3.93237	8.41138e-05	0.00162523	Nsd2		ENSMUSG00000029359	6147.26	-0.729545	0.603094	0.124763	-5.84744	4.99e-09	6.16e-07	Tesc
ENSMUSG00000003226	2984.75	0.395958	1.31582	0.0982666	4.02943	5.59128e-05	0.00117961	Ranbp2		ENSMUSG00000022708	6626.01	-0.727818	0.603816	0.158991	-4.57773	4.7e-06	0.000164951	Zbtb20
ENSMUSG00000031502	10401.5	0.396045	1.3159	0.1433	2.76375	0.0057142	0.0379295	Col4a1		ENSMUSG00000052605	418.185	-0.727674	0.603877	0.144373	-5.04024	4.65e-07	2.61e-05	Isoc2b
ENSMUSG00000029169	3032.77	0.398135	1.3178	0.0884175	4.50289	6.70347e-06	0.000216228	Dhx15		ENSMUSG00000006362	538.578	-0.726609	0.604323	0.237533	-3.05898	0.00222094	0.0190933	Cbfa2t3
ENSMUSG00000033365	704.884	0.398146	1.31781	0.121957	3.26463	0.00109607	0.01109	Ipo13		ENSMUSG00000022844	419.315	-0.725606	0.604743	0.160788	-4.51282	6.4e-06	0.000209374	Pdia5
ENSMUSG00000038299	1187.22	0.399535	1.31908	0.0989641	4.03717	5.40995e-05	0.00115225	Wdr36		ENSMUSG00000051515	308.161	-0.725192	0.604917	0.193137	-3.75481	0.000173473	0.00280649	Fam181b
ENSMUSG00000014498	1137.62	0.399663	1.3192	0.109899	3.63663	0.000276224	0.00395634	Ankrd52		ENSMUSG00000034563	804.51	-0.724961	0.605013	0.154987	-4.67757	2.9e-06	0.000113938	Ccpg1
ENSMUSG00000021948	2007.75	0.400417	1.31989	0.107783	3.71502	0.000203184	0.00317214	Prkcd		ENSMUSG00000104950	80.2287	-0.724655	0.605142	0.270549	-2.67847	0.00739603	0.0459478	NA
ENSMUSG00000029761	1749.14	0.400559	1.32002	0.102679	3.9011	9.57573e-05	0.00179252	Cald1		ENSMUSG00000004951	1046.03	-0.724572	0.605176	0.118613	-6.10873	1e-09	1.7e-07	Hspb1
ENSMUSG00000035666	1130.22	0.401065	1.32048	0.105721	3.7936	0.000148476	0.00251513	Gtf3c4		ENSMUSG00000026544	224.416	-0.724128	0.605363	0.192242	-3.76675	0.000165387	0.00270936	Dusp23
ENSMUSG00000063317	569.708	0.401106	1.32052	0.124175	3.23018	0.00123713	0.012147	Usp31		ENSMUSG00000040213	200.751	-0.723653	0.605562	0.183106	-3.9521	7.75e-05	0.00152129	Kyat3
ENSMUSG00000041438	777.227	0.401309	1.32071	0.125628	3.19442	0.00140113	0.0134281	Utp4		ENSMUSG00000016637	342.075	-0.721552	0.606445	0.146652	-4.92017	8.65e-07	4.18e-05	Ift27
ENSMUSG00000022378	1020.93	0.401457	1.32084	0.129001	3.11206	0.00185788	0.0167563	Fam49b		ENSMUSG00000042073	746.329	-0.721191	0.606597	0.132462	-5.44451	5.19e-08	4.25e-06	Abhd14b
ENSMUSG00000026694	550.043	0.401722	1.32108	0.131673	3.0509	0.00228159	0.0194827	Mettl13		ENSMUSG00000003420	2757.64	-0.720476	0.606897	0.138196	-5.21342	1.85e-07	1.21e-05	Fcgrt
ENSMUSG00000022119	1007.73	0.401739	1.3211	0.10999	3.65251	0.000259685	0.00379082	Rbm26		ENSMUSG00000016194	824.537	-0.720396	0.606931	0.122611	-5.87544	4.22e-09	5.44e-07	Hsd11b1
ENSMUSG00000029430	3853.67	0.40207	1.3214	0.12899	3.11706	0.00182662	0.0165542	Ran		ENSMUSG00000046447	1507.32	-0.72031	0.606967	0.129875	-5.54618	2.92e-08	2.62e-06	Camk2n1
ENSMUSG00000021595	2896.08	0.403183	1.32242	0.102729	3.92473	8.68253e-05	0.00165914	Nsun2		ENSMUSG00000074336	403.91	-0.71994	0.607123	0.18755	-3.83866	0.000123706	0.00217798	Apoc4
ENSMUSG00000078812	8913.46	0.403234	1.32247	0.123049	3.27702	0.00104908	0.0107328	Eif5a		ENSMUSG00000029864	1577.62	-0.718994	0.607521	0.152349	-4.71937	2.37e-06	9.64e-05	Gstk1
ENSMUSG00000015120	765.602	0.403257	1.32249	0.1112	3.6264	0.000287397	0.00405802	Ube2i		ENSMUSG00000032300	766.989	-0.717406	0.60819	0.212648	-3.37367	0.000741719	0.00828306	1700017B05Rik
ENSMUSG00000058748	512.698	0.405981	1.32499	0.142087	2.85727	0.00427306	0.0307303	Zfp958		ENSMUSG00000031938	3101.72	-0.716859	0.60842	0.152138	-4.71189	2.45e-06	9.88e-05	4931406C07Rik
ENSMUSG00000024477	423.407	0.406292	1.32528	0.137137	2.96266	0.0030499	0.0239633	Pggt1b		ENSMUSG00000020053	195.119	-0.714433	0.609445	0.260967	-2.73763	0.00618832	0.0401546	Igf1
ENSMUSG00000056536	784.864	0.406609	1.32557	0.133729	3.04055	0.00236147	0.0200148	Pign		ENSMUSG00000036086	135.737	-0.714356	0.609477	0.259773	-2.74992	0.00596097	0.03902	Zranb3
ENSMUSG00000033295	1202.45	0.407126	1.32604	0.116106	3.5065	0.000454043	0.00573041	Ptprf		ENSMUSG00000039914	1088.25	-0.713317	0.609916	0.123683	-5.7673	8.06e-09	9.25e-07	Coq10a
ENSMUSG00000037458	2488.7	0.407763	1.32663	0.113951	3.57841	0.000345692	0.00465656	Azin1		ENSMUSG00000017390	180.704	-0.709216	0.611652	0.231321	-3.06594	0.00216987	0.0188096	Aldoc
ENSMUSG00000026596	711.323	0.408539	1.32734	0.107218	3.81035	0.000138772	0.00238545	Abl2		ENSMUSG00000003541	226.565	-0.708889	0.611791	0.264461	-2.6805	0.00735118	0.0457651	Ier3
ENSMUSG00000021877	7096.52	0.408545	1.32735	0.102963	3.96787	7.25174e-05	0.00144775	Arf4		ENSMUSG00000033594	318.015	-0.707053	0.61257	0.180413	-3.91907	8.89e-05	0.00169651	Spata2l
ENSMUSG00000062825	1935.88	0.408756	1.32754	0.106173	3.84989	0.000118171	0.00209885	Actg1		ENSMUSG00000041132	287.532	-0.706537	0.612789	0.200426	-3.52518	0.000423192	0.00542436	N4bp2l1
ENSMUSG00000027787	1287.65	0.409454	1.32818	0.0937953	4.3654	1.26889e-05	0.000358875	Nmd3		ENSMUSG00000032648	790.23	-0.705943	0.613042	0.164582	-4.2893	1.79e-05	0.000479152	Pygm
ENSMUSG00000025612	381.249	0.409534	1.32826	0.149452	2.74024	0.00613935	0.0399364	Bach1		ENSMUSG00000038623	207.535	-0.704778	0.613537	0.217494	-3.24045	0.00119341	0.0118296	Tm6sf1
ENSMUSG00000038766	977.335	0.409561	1.32828	0.116999	3.50054	0.000464321	0.00582716	Gabpb2		ENSMUSG00000022540	298.871	-0.70322	0.6142	0.14656	-4.79816	1.6e-06	6.94e-05	Rogdi
ENSMUSG00000033257	450.779	0.410116	1.32879	0.140511	2.91874	0.00351447	0.0267648	Ttll4		ENSMUSG00000026154	718.729	-0.702798	0.61438	0.138939	-5.05831	4.23e-07	2.41e-05	Sdhaf4
ENSMUSG00000004665	613.614	0.410673	1.32931	0.143027	2.87129	0.00408799	0.0298232	Cnn2		ENSMUSG00000028470	768.504	-0.702481	0.614514	0.135752	-5.17473	2.28e-07	1.44e-05	Hint2
ENSMUSG00000055531	1596.23	0.41083	1.32945	0.113608	3.6162	0.000298955	0.00419343	Cpsf6		ENSMUSG00000064363	110826	-0.702278	0.614601	0.166423	-4.21982	2.44e-05	0.000617639	ND4
ENSMUSG00000024270	853.502	0.41132	1.3299	0.11663	3.5267	0.00042077	0.00540483	Slc39a6		ENSMUSG00000033318	540.231	-0.70106	0.61512	0.185436	-3.7806	0.000156453	0.00260955	Gstt2
ENSMUSG00000026181	1824.84	0.411535	1.3301	0.118774	3.46487	0.00053049	0.00643984	Ppm1f		ENSMUSG00000038555	395.393	-0.700835	0.615216	0.180126	-3.8908	9.99e-05	0.00184818	Reep2
ENSMUSG00000039683	405.809	0.411603	1.33016	0.152449	2.69994	0.00693523	0.043782	Sdk1		ENSMUSG00000023904	984.79	-0.699501	0.615785	0.143481	-4.87522	1.09e-06	5.01e-05	Hcfc1r1
ENSMUSG00000042228	882.538	0.411919	1.33045	0.136991	3.00691	0.00263922	0.0214725	Lyn		ENSMUSG00000028836	2376.62	-0.699123	0.615946	0.0978336	-7.14604	8.93e-13	5.25e-10	Slc30a2
ENSMUSG00000002881	2779.39	0.412065	1.33059	0.109115	3.77644	0.000159086	0.00263467	Nab1		ENSMUSG00000096606	257.569	-0.698158	0.616358	0.173104	-4.03316	5.5e-05	0.00116573	Tpbgl
ENSMUSG00000029071	1099.99	0.41228	1.33079	0.105815	3.89622	9.77048e-05	0.0018246	Dvl1		ENSMUSG00000046794	199.544	-0.695642	0.617435	0.199239	-3.49149	0.000480338	0.00598965	Ppp1r3b
ENSMUSG00000026014	4060.81	0.412285	1.33079	0.0924919	4.45753	8.29113e-06	0.000256319	Raph1		ENSMUSG00000022217	388.351	-0.695047	0.617689	0.136558	-5.08976	3.59e-07	2.1e-05	Emc9
ENSMUSG00000004846	1073.9	0.412634	1.33111	0.133042	3.10153	0.00192525	0.0172345	Plod3		ENSMUSG00000018672	854.517	-0.69442	0.617958	0.117353	-5.91737	3.27e-09	4.44e-07	Copz2
ENSMUSG00000028261	987.248	0.412811	1.33128	0.113221	3.64606	0.000266292	0.00385945	Ndufaf4		ENSMUSG00000018800	377.725	-0.694277	0.618019	0.228446	-3.03913	0.00237259	0.0200877	Abca5
ENSMUSG00000037965	1146.79	0.413738	1.33213	0.104285	3.96739	7.26654e-05	0.00144885	Zc3h7a		ENSMUSG00000001741	161.016	-0.694026	0.618126	0.206617	-3.359	0.000782258	0.00857628	Il16
ENSMUSG00000028953	1380.8	0.414116	1.33248	0.125843	3.29073	0.000999278	0.0103385	Abcf2		ENSMUSG00000055200	287.256	-0.69317	0.618493	0.194043	-3.57225	0.000353926	0.00473073	Sertad3
ENSMUSG00000002320	1088.09	0.414494	1.33283	0.103884	3.98999	6.60771e-05	0.00134849	Tm9sf1		ENSMUSG00000002831	294.135	-0.693158	0.618499	0.233093	-2.97374	0.00294199	0.0233742	Plin4
ENSMUSG00000029635	729.027	0.415013	1.33331	0.113955	3.64191	0.00027062	0.00390112	Cdk8		ENSMUSG00000044550	167.482	-0.692682	0.618703	0.258864	-2.67586	0.00745384	0.0462334	Tceal3
ENSMUSG00000051223	5026.41	0.415182	1.33347	0.101688	4.08291	4.44756e-05	0.000994775	Bzw1		ENSMUSG00000078235	158.422	-0.691913	0.619033	0.230596	-3.00054	0.00269498	0.0217887	Fam43b
ENSMUSG00000045038	621.09	0.415408	1.33368	0.137833	3.01386	0.0025795	0.0212065	Prkce		ENSMUSG00000025213	411.293	-0.691617	0.61916	0.153685	-4.50021	6.79e-06	0.000218074	Kazald1
ENSMUSG00000023988	765.398	0.416372	1.33457	0.149062	2.79327	0.00521774	0.0354479	Bysl		ENSMUSG00000040435	924.457	-0.691514	0.619204	0.182642	-3.78617	0.000152987	0.00256545	Ppp1r15a
ENSMUSG00000054648	369.762	0.416613	1.33479	0.134777	3.09112	0.00199404	0.017678	Zfp869		ENSMUSG00000021423	208.994	-0.690406	0.619679	0.213216	-3.23807	0.00120342	0.0119137	Ly86
ENSMUSG00000022661	1176.46	0.418436	1.33648	0.14518	2.88219	0.00394921	0.0291238	Cd200		ENSMUSG00000039908	177.621	-0.686979	0.621153	0.194357	-3.53462	0.000408368	0.00527331	Slc26a11
ENSMUSG00000014956	14486.9	0.419787	1.33773	0.108866	3.856	0.000115257	0.00205411	Ppp1cb		ENSMUSG00000057054	86.3406	-0.686818	0.621223	0.255287	-2.69037	0.00713722	0.0448035	Inca1
ENSMUSG00000026020	1804.08	0.420577	1.33846	0.115078	3.65471	0.00025747	0.00377784	Nop58		ENSMUSG00000026189	387.613	-0.686026	0.621564	0.146781	-4.6738	2.96e-06	0.000115692	Pecr
ENSMUSG00000109511	636.751	0.421128	1.33897	0.142498	2.95534	0.00312329	0.0244292	Nup62		ENSMUSG00000018102	1696.43	-0.68533	0.621864	0.134919	-5.07956	3.78e-07	2.2e-05	Hist1h2bc
ENSMUSG00000036693	756.651	0.421283	1.33912	0.135643	3.10583	0.00189747	0.0170347	Nop14		ENSMUSG00000054474	696.292	-0.683996	0.622439	0.155058	-4.41123	1.03e-05	0.000301069	Thnsl2
ENSMUSG00000067150	1262.1	0.422438	1.34019	0.128876	3.27788	0.00104591	0.0107108	Xpo5		ENSMUSG00000021928	273.542	-0.6837	0.622567	0.189243	-3.61281	0.000302894	0.00423527	Ebpl
ENSMUSG00000028318	316.04	0.422523	1.34027	0.149487	2.82649	0.00470606	0.0330058	Polr1e		ENSMUSG00000046404	937.481	-0.682056	0.623276	0.157017	-4.34385	1.4e-05	0.000390327	Yod1
ENSMUSG00000030220	323.638	0.422891	1.34061	0.140989	2.99946	0.00270458	0.0218437	Arhgdib		ENSMUSG00000022235	3377.74	-0.681015	0.623726	0.113989	-5.97441	2.31e-09	3.34e-07	Cmbl
ENSMUSG00000049482	434.851	0.423298	1.34099	0.135889	3.11503	0.00183926	0.0166461	Ctu2		ENSMUSG00000059824	5704.2	-0.680806	0.623817	0.174845	-3.89377	9.87e-05	0.00183221	Dbp
ENSMUSG00000031976	408.217	0.423407	1.34109	0.158	2.67979	0.00736675	0.0458114	Urb2		ENSMUSG00000039865	488.319	-0.680749	0.623841	0.151202	-4.50225	6.72e-06	0.000216432	Slc44a3
ENSMUSG00000036197	1021.76	0.423564	1.34124	0.154646	2.73893	0.00616402	0.0400636	Gxylt1		ENSMUSG00000027869	1007.89	-0.676884	0.625515	0.19013	-3.56011	0.0003707	0.00489625	Hsd3b6
ENSMUSG00000040850	1859.98	0.423646	1.34131	0.103073	4.11014	3.95417e-05	0.000913202	Psme4		ENSMUSG00000039347	2555.52	-0.676872	0.62552	0.141993	-4.76695	1.87e-06	7.91e-05	Atp6v0e2
ENSMUSG00000022114	532.253	0.423679	1.34134	0.150636	2.81259	0.00491436	0.034023	Spry2		ENSMUSG00000034968	222.688	-0.675362	0.626175	0.165527	-4.08008	4.5e-05	0.00100553	Lbx2
ENSMUSG00000033294	350.391	0.423952	1.3416	0.151454	2.79922	0.00512269	0.0350358	Noc4l		ENSMUSG00000064370	286466	-0.675361	0.626176	0.160152	-4.217	2.48e-05	0.000623402	CYTB
ENSMUSG00000020697	536.478	0.4241	1.34173	0.148358	2.85862	0.00425482	0.0306677	Lig3		ENSMUSG00000033065	1336.89	-0.673598	0.626941	0.16168	-4.16623	3.1e-05	0.000754305	Pfkm
ENSMUSG00000031028	1214.03	0.424676	1.34227	0.129381	3.28237	0.00102939	0.0105798	Tub		ENSMUSG00000097328	407.808	-0.672224	0.627539	0.176901	-3.8	0.000144693	0.00246073	Tnfsf12
ENSMUSG00000021585	933.076	0.426356	1.34383	0.134177	3.17756	0.00148522	0.0140785	Cast		ENSMUSG00000001666	376.324	-0.672018	0.627628	0.162165	-4.14403	3.41e-05	0.000813378	Ddt
ENSMUSG00000027613	2295.07	0.426447	1.34392	0.127498	3.34474	0.000823587	0.00889795	Eif6		ENSMUSG00000038776	6998.98	-0.671957	0.627655	0.138796	-4.84131	1.29e-06	5.77e-05	Ephx1
ENSMUSG00000030505	1174.04	0.427391	1.3448	0.11277	3.78992	0.000150696	0.00254068	Prmt3		ENSMUSG00000046027	538.388	-0.669412	0.628763	0.184472	-3.6288	0.000284744	0.00404497	Stard5
ENSMUSG00000021890	1826.76	0.427637	1.34503	0.10736	3.98322	6.7989e-05	0.00138029	Eaf1		ENSMUSG00000086158	204.658	-0.668186	0.629297	0.19557	-3.41661	0.00063407	0.00738188	Ccpg1os
ENSMUSG00000024037	507.571	0.428021	1.34539	0.142119	3.0117	0.00259789	0.021269	Wdr4		ENSMUSG00000040557	550.571	-0.66738	0.629649	0.194423	-3.43263	0.000597763	0.00708082	Mettl27
ENSMUSG00000031948	2461.97	0.428553	1.34588	0.130094	3.29418	0.000987087	0.0102463	Kars		ENSMUSG00000057176	141.331	-0.666229	0.630151	0.238009	-2.79918	0.00512329	0.0350358	Ccdc189
ENSMUSG00000079108	382.585	0.42926	1.34654	0.153398	2.79834	0.00513653	0.0350904	Srp54c		ENSMUSG00000020186	1356.6	-0.665903	0.630294	0.135324	-4.9208	8.62e-07	4.18e-05	Csrp2
ENSMUSG00000034126	432.175	0.429868	1.34711	0.137519	3.12587	0.00177281	0.0161855	Pomt2		ENSMUSG00000026610	652.073	-0.665792	0.630343	0.232238	-2.86685	0.00414576	0.030118	Esrrg
ENSMUSG00000002233	1732.18	0.430078	1.34731	0.1553	2.76933	0.00561714	0.0375406	Rhoc		ENSMUSG00000026832	271.868	-0.665312	0.630552	0.229423	-2.89994	0.00373231	0.0279735	Cytip
ENSMUSG00000029762	3576.3	0.430223	1.34744	0.154925	2.77698	0.00548664	0.0368951	Akr1b8		ENSMUSG00000063018	641.422	-0.664771	0.630789	0.143392	-4.63604	3.55e-06	0.000132014	NA
ENSMUSG00000027475	1239.11	0.430694	1.34788	0.112536	3.82717	0.000129623	0.00225354	Kif3b		ENSMUSG00000022474	808.407	-0.664647	0.630843	0.117015	-5.68004	1.35e-08	1.37e-06	Pmm1
ENSMUSG00000028771	1271.89	0.430935	1.34811	0.143359	3.00599	0.00264719	0.0215078	Ptpn12		ENSMUSG00000030532	241.791	-0.663322	0.631423	0.16324	-4.06347	4.83e-05	0.00106612	Hddc3
ENSMUSG00000020706	1932.5	0.431293	1.34844	0.128831	3.34774	0.000814746	0.00882707	Ftsj3		ENSMUSG00000040093	443.21	-0.66312	0.631511	0.182683	-3.62989	0.000283541	0.00404259	Bmf
ENSMUSG00000054611	2127.46	0.432391	1.34947	0.114614	3.77257	0.000161573	0.00265804	Kdm2a		ENSMUSG00000026688	1521.17	-0.66276	0.631669	0.155448	-4.26356	2.01e-05	0.00052526	Mgst3
ENSMUSG00000041313	3275.17	0.432645	1.34971	0.100609	4.30026	1.70597e-05	0.000462388	Slc7a1		ENSMUSG00000032398	604.256	-0.660986	0.632446	0.169178	-3.90706	9.34e-05	0.00175946	Snapc5
ENSMUSG00000001305	489.624	0.433602	1.3506	0.144139	3.00822	0.00262779	0.0214118	Rrp15		ENSMUSG00000021388	194.549	-0.660882	0.632492	0.195312	-3.38373	0.000715085	0.00804896	Aspn
ENSMUSG00000048106	454.561	0.43451	1.35145	0.143898	3.01957	0.00253137	0.0209543	4632415L05Rik		ENSMUSG00000027490	200.662	-0.660867	0.632498	0.17906	-3.69076	0.000223583	0.00341878	E2f1
ENSMUSG00000027074	1256.61	0.434577	1.35151	0.11969	3.63086	0.000282475	0.00403108	Slc43a3		ENSMUSG00000102252	315.832	-0.660579	0.632624	0.181624	-3.63706	0.000275765	0.00395466	Snrpn
ENSMUSG00000020790	1989.52	0.435711	1.35258	0.112122	3.88604	0.000101894	0.0018714	Ankfy1		ENSMUSG00000018845	138.154	-0.660101	0.632834	0.215535	-3.06262	0.00219408	0.0189457	Unc45b
ENSMUSG00000035545	1015.26	0.436357	1.35318	0.121832	3.58162	0.000341464	0.00463157	Leng8		ENSMUSG00000095687	642.84	-0.659984	0.632886	0.117973	-5.59434	2.21e-08	2.07e-06	Rnaset2a
ENSMUSG00000036093	1336.19	0.436542	1.35336	0.0941045	4.63891	3.50257e-06	0.000130819	Arl5a		ENSMUSG00000021592	472.198	-0.659359	0.63316	0.150568	-4.37915	1.19e-05	0.000340042	Arsk
ENSMUSG00000040565	622.778	0.437002	1.35379	0.112367	3.88905	0.000100639	0.00185485	Btaf1		ENSMUSG00000045103	861.535	-0.658528	0.633524	0.139983	-4.70433	2.55e-06	0.000102223	Dmd
ENSMUSG00000042328	254.002	0.437003	1.35379	0.162889	2.68283	0.00730029	0.045516	Hps4		ENSMUSG00000041012	121.864	-0.65825	0.633646	0.215328	-3.05697	0.00223589	0.0192006	Cmtm8
ENSMUSG00000028961	3599.45	0.43781	1.35455	0.140941	3.10634	0.00189418	0.0170247	Pgd		ENSMUSG00000020388	292.125	-0.657319	0.634055	0.161561	-4.06855	4.73e-05	0.00104463	Pdlim4
ENSMUSG00000040463	1649.85	0.437883	1.35461	0.129509	3.3811	0.000721969	0.00810307	Mybbp1a		ENSMUSG00000095930	143.342	-0.656731	0.634314	0.222628	-2.94991	0.00317867	0.0247016	Nim1k
ENSMUSG00000053931	7789.95	0.438475	1.35517	0.133276	3.28996	0.001002	0.010346	Cnn3		ENSMUSG00000026839	295.684	-0.656467	0.63443	0.181836	-3.61022	0.000305941	0.00426079	Upp2
ENSMUSG00000019986	580.031	0.438475	1.35517	0.1397	3.13868	0.00169712	0.0156039	Ahi1		ENSMUSG00000052102	896.932	-0.654422	0.63533	0.134733	-4.85718	1.19e-06	5.39e-05	Gnpda1
ENSMUSG00000045411	1016.53	0.438857	1.35553	0.10672	4.11222	3.91881e-05	0.00090793	2410002F23Rik		ENSMUSG00000019437	842.949	-0.653752	0.635625	0.148148	-4.41282	1.02e-05	0.000299418	Tlcd1
ENSMUSG00000030203	792.116	0.438914	1.35558	0.154447	2.84185	0.00448523	0.0319304	Dusp16		ENSMUSG00000025766	473.534	-0.652304	0.636263	0.206765	-3.15481	0.00160602	0.0150044	D3Ertd751e
ENSMUSG00000023022	1284.6	0.439858	1.35647	0.115365	3.81274	0.000137436	0.00237614	Lima1		ENSMUSG00000075702	325.167	-0.652055	0.636373	0.19581	-3.33004	0.000868322	0.0092534	Selenom
ENSMUSG00000067942	370.645	0.440347	1.35693	0.137778	3.19607	0.00139312	0.0133678	Zfp160		ENSMUSG00000025497	184.132	-0.652002	0.636397	0.196531	-3.31756	0.000908089	0.00959856	Cdhr5
ENSMUSG00000022707	821.786	0.441199	1.35773	0.109243	4.03869	5.37502e-05	0.00114794	Gbe1		ENSMUSG00000019810	417.765	-0.650562	0.637032	0.179659	-3.62109	0.000293369	0.00412249	Fuca2
ENSMUSG00000044783	977.053	0.441314	1.35784	0.111437	3.9602	7.4887e-05	0.00148367	A730008H23Rik		ENSMUSG00000001942	761.788	-0.650272	0.63716	0.139023	-4.67745	2.9e-06	0.000113938	Siae
ENSMUSG00000085148	1369.87	0.441452	1.35797	0.107632	4.10149	4.10492e-05	0.000942442	Mir22hg		ENSMUSG00000078566	1933.09	-0.649406	0.637543	0.142624	-4.55327	5.28e-06	0.000181235	Bnip3
ENSMUSG00000026921	1444.03	0.443393	1.3598	0.145659	3.04404	0.00233423	0.019827	Egfl7		ENSMUSG00000074604	539.788	-0.648948	0.637745	0.190868	-3.39998	0.000673903	0.00771899	Mgst2
ENSMUSG00000051615	1233.64	0.444049	1.36042	0.132329	3.35565	0.000791795	0.00865651	Rap2a		ENSMUSG00000051483	1060.31	-0.648401	0.637987	0.118896	-5.45352	4.94e-08	4.09e-06	Cbr1
ENSMUSG00000102918	756.141	0.44452	1.36086	0.109761	4.04989	5.12407e-05	0.00110799	Pcdhgc3		ENSMUSG00000042116	148.063	-0.647435	0.638414	0.231168	-2.80071	0.00509908	0.0349613	Vwa1
ENSMUSG00000004356	650.063	0.445689	1.36196	0.117675	3.78744	0.000152206	0.00255521	Utp20		ENSMUSG00000043251	494.579	-0.647041	0.638589	0.145084	-4.45978	8.2e-06	0.000254139	Exoc3l
ENSMUSG00000037419	610.69	0.446449	1.36268	0.151167	2.95336	0.00314337	0.024517	Endod1		ENSMUSG00000048347	97.4837	-0.646929	0.638638	0.236505	-2.73537	0.00623102	0.0403982	Pcdhb18
ENSMUSG00000040761	839.326	0.446674	1.36289	0.154095	2.89868	0.00374731	0.0280524	Spen		ENSMUSG00000037971	872.437	-0.646794	0.638698	0.160407	-4.03221	5.53e-05	0.00116889	1110032A03Rik
ENSMUSG00000034327	887.22	0.447056	1.36326	0.126513	3.53367	0.000409833	0.00528349	Kctd9		ENSMUSG00000002043	830.839	-0.646228	0.638949	0.153777	-4.20238	2.64e-05	0.000661123	Trappc6a
ENSMUSG00000059005	4371.59	0.447074	1.36327	0.0826102	5.41185	6.23779e-08	4.86922e-06	Hnrnpa3		ENSMUSG00000014633	878.864	-0.646169	0.638975	0.155829	-4.14666	3.37e-05	0.000806576	Cmc2
ENSMUSG00000007850	5482.34	0.447297	1.36348	0.0768015	5.82406	5.74362e-09	6.84499e-07	Hnrnph1		ENSMUSG00000024253	397.905	-0.644598	0.639671	0.170146	-3.7885	0.000151559	0.00255247	Dync2li1
ENSMUSG00000008393	1819.12	0.447356	1.36354	0.163373	2.73826	0.00617659	0.0401248	Carhsp1		ENSMUSG00000024610	5824.79	-0.644212	0.639842	0.130133	-4.95043	7.41e-07	3.74e-05	Cd74
ENSMUSG00000006442	1358.58	0.448013	1.36416	0.144241	3.10599	0.00189641	0.0170347	Srm		ENSMUSG00000011382	2809.07	-0.643641	0.640096	0.164468	-3.91347	9.1e-05	0.00172582	Dhdh
ENSMUSG00000029478	2898.28	0.448103	1.36425	0.0829877	5.39964	6.67758e-08	5.08771e-06	Ncor2		ENSMUSG00000002274	558.148	-0.643045	0.64036	0.167473	-3.8397	0.000123184	0.0021755	Metrn
ENSMUSG00000029202	1411.97	0.448318	1.36445	0.106755	4.19952	2.67483e-05	0.000666019	Pds5a		ENSMUSG00000052133	1807.15	-0.641704	0.640955	0.167237	-3.8371	0.000124494	0.00218873	Sema5b
ENSMUSG00000022094	721.731	0.44962	1.36568	0.143781	3.12713	0.00176523	0.0161257	Slc39a14		ENSMUSG00000073421	2615.95	-0.641191	0.641183	0.138715	-4.62237	3.79e-06	0.000139038	H2-Ab1
ENSMUSG00000005103	2581.61	0.4497	1.36576	0.115575	3.89099	9.98374e-05	0.00184818	Wdr1		ENSMUSG00000004263	192.953	-0.640831	0.641343	0.180885	-3.54276	0.000395968	0.00516445	Atn1
ENSMUSG00000024360	4417.64	0.44977	1.36582	0.0837675	5.36927	7.90564e-08	5.82184e-06	Etf1		ENSMUSG00000032606	580.42	-0.639835	0.641786	0.155328	-4.11924	3.8e-05	0.000889738	Nicn1
ENSMUSG00000079036	356.262	0.450466	1.36648	0.156847	2.87201	0.00407873	0.0297696	Alkbh1		ENSMUSG00000028803	448.371	-0.639635	0.641875	0.153654	-4.16284	3.14e-05	0.000761962	Nipal3
ENSMUSG00000032058	469.463	0.45052	1.36653	0.128635	3.50231	0.00046124	0.00579781	Ppp2r1b		ENSMUSG00000036644	8084.93	-0.636732	0.643168	0.145701	-4.37014	1.24e-05	0.000352281	Tbc1d9b
ENSMUSG00000062115	958.142	0.450591	1.3666	0.123696	3.64273	0.000269766	0.00389242	Rai1		ENSMUSG00000022848	1925.71	-0.636465	0.643287	0.144431	-4.40672	1.05e-05	0.000305683	Dirc2
ENSMUSG00000003762	608.45	0.450855	1.36685	0.14361	3.13943	0.00169276	0.015573	Coq8b		ENSMUSG00000101856	169.834	-0.635871	0.643552	0.189753	-3.35104	0.000805085	0.00876498	1700096K18Rik
ENSMUSG00000034591	341.671	0.451034	1.36702	0.167479	2.69307	0.00707969	0.0445498	Slc41a2		ENSMUSG00000044749	124.531	-0.635361	0.64378	0.227659	-2.79085	0.00525705	0.0356375	Abca6
ENSMUSG00000031503	4708.81	0.451122	1.3671	0.129488	3.4839	0.00049416	0.00611039	Col4a2		ENSMUSG00000021943	662.612	-0.634921	0.643976	0.186828	-3.39842	0.000677765	0.00774051	Gdf10
ENSMUSG00000078652	2126.52	0.451487	1.36745	0.103758	4.35135	1.35302e-05	0.000378556	Psme3		ENSMUSG00000028555	184.9	-0.634248	0.644276	0.232243	-2.73097	0.00631477	0.0407887	Ttc39a
ENSMUSG00000022816	1161.96	0.451503	1.36746	0.165131	2.73421	0.00625293	0.0404729	Fstl1		ENSMUSG00000029314	160.148	-0.632856	0.644898	0.22495	-2.81332	0.00490325	0.0339767	Gpat3
ENSMUSG00000041028	14878.5	0.451575	1.36753	0.122115	3.69795	0.000217346	0.00334306	Ghitm		ENSMUSG00000042293	184.97	-0.632761	0.644941	0.19232	-3.29015	0.00100134	0.010346	Gm5617
ENSMUSG00000045005	682.885	0.452126	1.36806	0.149164	3.03106	0.00243695	0.0204063	Fzd5		ENSMUSG00000032121	246.632	-0.632745	0.644948	0.172948	-3.65859	0.000253606	0.00373518	Tmem218
ENSMUSG00000032834	735.784	0.452193	1.36812	0.14358	3.14942	0.00163593	0.0151754	Pwp2		ENSMUSG00000086369	1157.08	-0.632127	0.645224	0.116609	-5.42092	5.93e-08	4.7e-06	E330017L17Rik
ENSMUSG00000056870	1547.13	0.452318	1.36824	0.135219	3.34509	0.000822566	0.00889328	Gulp1		ENSMUSG00000040957	441.279	-0.627981	0.647081	0.18422	-3.40887	0.000652321	0.00753815	Cables1
ENSMUSG00000035078	474.947	0.452438	1.36835	0.129752	3.48695	0.000488554	0.0060727	Mtmr9		ENSMUSG00000020642	480.462	-0.627729	0.647195	0.152522	-4.11567	3.86e-05	0.000898229	Rnf144a
ENSMUSG00000029599	1558.17	0.453896	1.36973	0.11479	3.95413	7.68126e-05	0.00151033	Ddx54		ENSMUSG00000054619	1136.25	-0.627025	0.64751	0.122825	-5.10503	3.31e-07	1.97e-05	Mettl7a1
ENSMUSG00000037351	3679.57	0.455475	1.37123	0.101819	4.47337	7.69969e-06	0.000241866	Actr1b		ENSMUSG00000039081	981.757	-0.625623	0.64814	0.140847	-4.44187	8.92e-06	0.000271399	Zfp503
ENSMUSG00000020250	2090.42	0.456403	1.37212	0.110874	4.11641	3.84813e-05	0.000896673	Txnrd1		ENSMUSG00000021390	757.422	-0.625293	0.648288	0.235016	-2.66064	0.0077992	0.0476001	Ogn
ENSMUSG00000027889	2323.53	0.456778	1.37247	0.123027	3.71282	0.000204964	0.00319671	Ampd2		ENSMUSG00000026004	624.962	-0.624006	0.648867	0.112983	-5.52302	3.33e-08	2.92e-06	Kansl1l
ENSMUSG00000058355	3287.62	0.457152	1.37283	0.0957039	4.77674	1.78162e-06	7.55831e-05	Abce1		ENSMUSG00000053559	549.179	-0.622984	0.649326	0.134378	-4.63607	3.55e-06	0.000132014	Smagp
ENSMUSG00000021149	1773.23	0.458215	1.37384	0.11783	3.88878	0.00010075	0.00185485	Gtpbp4		ENSMUSG00000023911	133.044	-0.622596	0.649501	0.214281	-2.90551	0.00366654	0.02756	Flywch2
ENSMUSG00000000915	339.946	0.458393	1.37401	0.172802	2.65271	0.00798483	0.0483517	Hip1r		ENSMUSG00000024365	134280	-0.622111	0.64972	0.115215	-5.39956	6.68e-08	5.09e-06	Cyp21a1
ENSMUSG00000063800	651.967	0.458697	1.3743	0.128496	3.56973	0.000357352	0.00476429	Prpf38a		ENSMUSG00000004610	714.452	-0.621901	0.649814	0.108441	-5.73491	9.76e-09	1.05e-06	Etfb
ENSMUSG00000039285	1898.98	0.459557	1.37512	0.113137	4.06196	4.86628e-05	0.00106931	Azi2		ENSMUSG00000026939	296.552	-0.621621	0.64994	0.185265	-3.35531	0.000792748	0.00866087	Tmem141
ENSMUSG00000029415	695.086	0.45993	1.37547	0.116277	3.95547	7.63839e-05	0.00150379	Sdad1		ENSMUSG00000049858	351.566	-0.619957	0.650691	0.206246	-3.00592	0.00264783	0.0215078	Suox
ENSMUSG00000026797	525.975	0.460262	1.37579	0.135037	3.40841	0.000653415	0.0075452	Stxbp1		ENSMUSG00000039646	241.491	-0.61975	0.650784	0.178141	-3.47898	0.000503329	0.00618738	Vasn
ENSMUSG00000039000	1409.63	0.462922	1.37833	0.0932868	4.96235	6.96457e-07	3.58226e-05	Ube3c		ENSMUSG00000050777	216.814	-0.619203	0.651031	0.215063	-2.87917	0.0039872	0.0292657	Tmem37
ENSMUSG00000056427	288.357	0.462952	1.37836	0.167419	2.76523	0.0056883	0.0377897	Slit3		ENSMUSG00000097867	177.848	-0.619184	0.651039	0.18214	-3.39949	0.000675107	0.0077271	NA
ENSMUSG00000039697	993.153	0.463947	1.37931	0.132276	3.50741	0.000452486	0.00571539	Ncoa7		ENSMUSG00000027165	599.43	-0.61839	0.651397	0.152851	-4.0457	5.22e-05	0.00112037	B230118H07Rik
ENSMUSG00000061731	1588.27	0.464073	1.37943	0.145979	3.17905	0.00147761	0.0140148	Ext1		ENSMUSG00000037938	452.343	-0.618307	0.651435	0.136632	-4.52533	6.03e-06	0.000199962	Chchd5
ENSMUSG00000028820	2944.49	0.46413	1.37949	0.110994	4.18158	2.8949e-05	0.000712857	Sfpq		ENSMUSG00000062691	670.495	-0.617569	0.651768	0.147786	-4.17882	2.93e-05	0.000719306	Cebpzos
ENSMUSG00000022974	677.746	0.464568	1.3799	0.108824	4.26898	1.96366e-05	0.000516107	Paxbp1		ENSMUSG00000018217	3400.5	-0.616656	0.652181	0.119904	-5.14293	2.7e-07	1.65e-05	Pmp22
ENSMUSG00000029366	304.227	0.464691	1.38002	0.163339	2.84495	0.00444182	0.0316939	Dck		ENSMUSG00000026568	2210.77	-0.616336	0.652326	0.113622	-5.42446	5.81e-08	4.65e-06	Mpc2
ENSMUSG00000000384	667.402	0.468497	1.38367	0.108458	4.3196	1.56314e-05	0.000431925	Tbrg4		ENSMUSG00000033578	16564.9	-0.615773	0.65258	0.0956671	-6.43662	1.22e-10	2.84e-08	Tmem35a
ENSMUSG00000033706	890.017	0.468969	1.38412	0.128391	3.65265	0.000259546	0.00379082	Smyd5		ENSMUSG00000027890	338.948	-0.615731	0.652599	0.157517	-3.90899	9.27e-05	0.00174965	Gstm4
ENSMUSG00000036902	242.874	0.470134	1.38524	0.157222	2.99025	0.00278747	0.0223628	Neto2		ENSMUSG00000064367	86536	-0.614771	0.653033	0.17409	-3.53134	0.000413455	0.00531702	ND5
ENSMUSG00000035671	742.071	0.47116	1.38622	0.149353	3.15468	0.00160674	0.0150044	Zswim4		ENSMUSG00000048240	317.763	-0.614575	0.653122	0.19938	-3.08243	0.00205319	0.0180588	Gng7
ENSMUSG00000009108	465.146	0.471942	1.38698	0.176435	2.67488	0.00747569	0.0462822	Gnat2		ENSMUSG00000096956	805.257	-0.614362	0.653219	0.163297	-3.76223	0.000168403	0.00274438	Snhg18
ENSMUSG00000031134	565.441	0.472231	1.38725	0.140273	3.36652	0.000761228	0.00844232	Rbmx		ENSMUSG00000033174	2953.35	-0.614142	0.653318	0.169598	-3.62116	0.000293286	0.00412249	Mgll
ENSMUSG00000064262	514.71	0.473971	1.38893	0.139677	3.39333	0.000690492	0.00784567	Gimap8		ENSMUSG00000031765	1945.36	-0.613851	0.65345	0.158643	-3.86938	0.00010911	0.00197385	Mt1
ENSMUSG00000020057	494.815	0.474069	1.38902	0.17103	2.77184	0.00557408	0.0373404	Dram1		ENSMUSG00000022090	428.22	-0.613592	0.653568	0.155032	-3.95783	7.56e-05	0.00149278	Pdlim2
ENSMUSG00000037376	812.863	0.474093	1.38904	0.126535	3.74675	0.000179142	0.00288623	Trmt6		ENSMUSG00000040466	430.78	-0.612504	0.654061	0.15735	-3.89262	9.92e-05	0.00183871	Blvrb
ENSMUSG00000022557	1026.46	0.474775	1.3897	0.114996	4.12863	3.64932e-05	0.000861924	Bop1		ENSMUSG00000071711	720.833	-0.612231	0.654184	0.118376	-5.1719	2.32e-07	1.45e-05	Mpst
ENSMUSG00000020547	319.621	0.474951	1.38987	0.156329	3.03815	0.00238036	0.0201203	Bzw2		ENSMUSG00000042225	530.162	-0.61202	0.65428	0.17318	-3.53401	0.000409301	0.005281	Ammecr1
ENSMUSG00000039834	425.188	0.475012	1.38993	0.139566	3.40348	0.000665321	0.00764174	Zfp335		ENSMUSG00000041577	282.346	-0.611341	0.654588	0.230767	-2.64918	0.00806885	0.0487126	Prelp
ENSMUSG00000023030	2256.65	0.475958	1.39084	0.129674	3.67042	0.000242155	0.00361427	Slc11a2		ENSMUSG00000021884	371.078	-0.61125	0.654629	0.161361	-3.78808	0.000151817	0.00255406	Hacl1
ENSMUSG00000034292	414.336	0.476083	1.39096	0.157255	3.02746	0.00246615	0.0205781	Traf3ip1		ENSMUSG00000020814	2113.28	-0.610829	0.65482	0.12893	-4.73769	2.16e-06	9.01e-05	Mxra7
ENSMUSG00000041949	190.219	0.47853	1.39332	0.175398	2.72825	0.00636704	0.0410185	Tango6		ENSMUSG00000023094	718.403	-0.610828	0.654821	0.123785	-4.93458	8.03e-07	3.99e-05	Msrb2
ENSMUSG00000029192	1395.44	0.478875	1.39366	0.10796	4.43567	9.17843e-06	0.000275765	Tbc1d14		ENSMUSG00000038527	789.5	-0.609846	0.655267	0.132763	-4.59348	4.36e-06	0.00015717	C1rl
ENSMUSG00000021339	280.115	0.479291	1.39406	0.171725	2.79104	0.00525385	0.0356312	Mrs2		ENSMUSG00000025170	193.323	-0.609815	0.655281	0.224153	-2.72053	0.00651767	0.0417709	Rab40b
ENSMUSG00000018362	257.117	0.480506	1.39523	0.17578	2.73357	0.00626518	0.0405354	Kpna2		ENSMUSG00000005142	867.697	-0.609758	0.655307	0.120461	-5.06186	4.15e-07	2.37e-05	Man2b1
ENSMUSG00000030512	515.062	0.480995	1.39571	0.153803	3.12733	0.00176399	0.0161238	Snrpa1		ENSMUSG00000022756	589.615	-0.609532	0.655409	0.159338	-3.8254	0.000130558	0.00226727	Slc7a4
ENSMUSG00000036054	357.359	0.481745	1.39643	0.156824	3.07188	0.00212713	0.0185731	Sugp2		ENSMUSG00000027984	7712.46	-0.608911	0.655692	0.132952	-4.57994	4.65e-06	0.000164282	Hadh
ENSMUSG00000024493	1146.01	0.481803	1.39649	0.156403	3.08053	0.00206636	0.0181338	Lars		ENSMUSG00000057103	669.918	-0.608577	0.655843	0.124156	-4.9017	9.5e-07	4.54e-05	Nat8f1
ENSMUSG00000025332	1047.75	0.481821	1.39651	0.120799	3.98861	6.6463e-05	0.00135459	Kdm5c		ENSMUSG00000110613	192.025	-0.60851	0.655874	0.228265	-2.66581	0.00768041	0.0471701	Lncbate1
ENSMUSG00000053091	334.287	0.481982	1.39666	0.145182	3.31985	0.000900652	0.00953862	Lins1		ENSMUSG00000044080	761.559	-0.607516	0.656326	0.134692	-4.5104	6.47e-06	0.000210459	S100a1
ENSMUSG00000028483	283.346	0.48242	1.39709	0.171942	2.80572	0.00502038	0.034543	Snapc3		ENSMUSG00000000295	652.708	-0.60699	0.656565	0.167047	-3.63364	0.000279452	0.00399524	Hddc2
ENSMUSG00000022346	925.875	0.482946	1.39759	0.118063	4.09057	4.3031e-05	0.000972213	Myc		ENSMUSG00000044068	813.404	-0.606826	0.65664	0.123215	-4.92496	8.44e-07	4.14e-05	Zrsr1
ENSMUSG00000036499	922.403	0.488422	1.40291	0.109668	4.45363	8.44305e-06	0.000259474	Eea1		ENSMUSG00000002058	1041.95	-0.606121	0.656961	0.120749	-5.01966	5.18e-07	2.81e-05	Unc119
ENSMUSG00000021958	172.011	0.488532	1.40302	0.177297	2.75545	0.00586123	0.0385936	Pinx1		ENSMUSG00000034758	824.529	-0.605959	0.657035	0.147905	-4.09694	4.19e-05	0.000955557	Tle6
ENSMUSG00000049659	2051.06	0.489529	1.40399	0.114065	4.29167	1.77337e-05	0.000477079	Aftph		ENSMUSG00000006717	746.425	-0.605933	0.657046	0.1594	-3.80134	0.000143917	0.0024502	Acot13
ENSMUSG00000020994	1072.18	0.491378	1.40579	0.112364	4.37309	1.22502e-05	0.000348996	Pnn		ENSMUSG00000063172	184.139	-0.605161	0.657398	0.192068	-3.15076	0.00162848	0.0151338	Hspb11
ENSMUSG00000054008	3781.72	0.491725	1.40613	0.0992774	4.95304	7.30621e-07	3.7034e-05	Ndst1		ENSMUSG00000044986	2682.61	-0.604058	0.657901	0.098617	-6.12529	9.05e-10	1.58e-07	Tst
ENSMUSG00000035891	1381.08	0.492118	1.40651	0.124786	3.9437	8.02339e-05	0.00156186	Cerk		ENSMUSG00000028795	280.775	-0.603997	0.657929	0.17327	-3.48588	0.000490527	0.00608269	Ccdc28b
ENSMUSG00000071337	760.722	0.492269	1.40666	0.145409	3.38541	0.000710715	0.00801132	Tia1		ENSMUSG00000000296	756.875	-0.603146	0.658317	0.209827	-2.87449	0.00404681	0.0295919	Tpd52l1
ENSMUSG00000027677	1007.09	0.492544	1.40692	0.110244	4.46777	7.90383e-06	0.000247284	Ttc14		ENSMUSG00000025486	584.111	-0.599845	0.659825	0.148904	-4.02841	5.62e-05	0.00118154	Sirt3
ENSMUSG00000032525	1405.27	0.493602	1.40796	0.129096	3.82354	0.000131552	0.00228198	Nktr		ENSMUSG00000040562	3265.35	-0.599202	0.660119	0.110618	-5.41687	6.07e-08	4.77e-06	Gstm2
ENSMUSG00000004677	1009.52	0.494541	1.40887	0.128026	3.86281	0.000112089	0.00200611	Myo9b		ENSMUSG00000042312	373.712	-0.598743	0.660329	0.133447	-4.48673	7.23e-06	0.000230818	S100a13
ENSMUSG00000016921	4395.57	0.494747	1.40907	0.096318	5.1366	2.79755e-07	1.68631e-05	Srsf6		ENSMUSG00000023966	304.029	-0.598242	0.660558	0.162688	-3.67723	0.00023578	0.0035634	Rsph9
ENSMUSG00000036916	310.254	0.495227	1.40954	0.14428	3.43241	0.000598232	0.00708082	Zfp280c		ENSMUSG00000014791	138.216	-0.598208	0.660574	0.217338	-2.75242	0.00591558	0.0388205	Elmo3
ENSMUSG00000043183	522.609	0.495412	1.40972	0.151993	3.25944	0.00111633	0.0112512	Simc1		ENSMUSG00000021792	546.515	-0.597161	0.661054	0.164273	-3.63518	0.000277786	0.00397506	Fam213a
ENSMUSG00000075470	576.722	0.495659	1.40996	0.123227	4.02232	5.76266e-05	0.00120437	Alg10b		ENSMUSG00000032380	142.04	-0.597126	0.66107	0.220531	-2.70768	0.00677556	0.0429651	Dapk2
ENSMUSG00000031781	887.468	0.495891	1.41019	0.122628	4.04388	5.25733e-05	0.00112589	Ciapin1		ENSMUSG00000035642	453.077	-0.596682	0.661273	0.176116	-3.388	0.000704032	0.00795528	Aamdc
ENSMUSG00000002319	1828.26	0.496572	1.41086	0.130743	3.79807	0.000145828	0.00247734	Ipo4		ENSMUSG00000020381	235.893	-0.596651	0.661287	0.168097	-3.54945	0.000386031	0.00503906	Mrnip
ENSMUSG00000015143	525.808	0.496599	1.41088	0.14997	3.31132	0.000928555	0.00977519	Actn1		ENSMUSG00000028581	513.422	-0.596315	0.661441	0.174129	-3.42456	0.000615785	0.00723374	Laptm5
ENSMUSG00000021866	248.105	0.49688	1.41116	0.156166	3.18174	0.00146395	0.0139361	Anxa11		ENSMUSG00000057234	140.153	-0.596257	0.661468	0.214711	-2.77702	0.005486	0.0368951	Mettl15
ENSMUSG00000021952	318.091	0.498223	1.41247	0.176429	2.82392	0.00474404	0.0331679	Xpo4		ENSMUSG00000049881	220.212	-0.595519	0.661806	0.17138	-3.47485	0.000511134	0.00625868	2810025M15Rik
ENSMUSG00000039456	619.733	0.498233	1.41248	0.129775	3.83922	0.000123425	0.00217731	Morc3		ENSMUSG00000030246	759.126	-0.594681	0.662191	0.185924	-3.19851	0.00138141	0.0132881	Ldhb
ENSMUSG00000000127	333.716	0.499391	1.41362	0.143408	3.48232	0.000497085	0.00612994	Fer		ENSMUSG00000047656	147.235	-0.594249	0.662389	0.199756	-2.97488	0.00293106	0.0233111	Trpt1
ENSMUSG00000034120	5034.32	0.500126	1.41434	0.0883203	5.66264	1.49064e-08	1.48228e-06	Srsf2		ENSMUSG00000067369	1612.98	-0.594154	0.662433	0.145395	-4.08648	4.38e-05	0.000985229	Trmt2b
ENSMUSG00000054051	421.99	0.501148	1.41534	0.136191	3.67975	0.000233466	0.00354215	Ercc6		ENSMUSG00000028497	213.336	-0.593701	0.662641	0.175501	-3.3829	0.000717236	0.00806693	Hacd4
ENSMUSG00000050002	621.214	0.501359	1.41555	0.15666	3.2003	0.00137284	0.0132138	Idnk		ENSMUSG00000055799	252.818	-0.593415	0.662772	0.187754	-3.1606	0.00157443	0.0147984	Tcf7l1
ENSMUSG00000029110	1957.54	0.501501	1.41569	0.0965471	5.19437	2.05418e-07	1.3252e-05	Rnf4		ENSMUSG00000002633	1980.26	-0.592525	0.663181	0.19735	-3.00241	0.00267849	0.0217003	Shh
ENSMUSG00000042807	373.819	0.50186	1.41604	0.167915	2.98878	0.00280094	0.0224362	Hecw2		ENSMUSG00000050640	150.255	-0.591935	0.663452	0.216453	-2.73471	0.00624351	0.0404455	Tmem150c
ENSMUSG00000063268	1311.87	0.50372	1.41786	0.165198	3.04919	0.00229461	0.0195436	Parp10		ENSMUSG00000039382	506.969	-0.590994	0.663885	0.16952	-3.48627	0.000489809	0.00607862	Wdr45
ENSMUSG00000021282	8959.67	0.503986	1.41813	0.121501	4.148	3.3539e-05	0.000804318	Eif5		ENSMUSG00000028967	865.329	-0.590655	0.664041	0.187445	-3.15109	0.00162663	0.0151338	Errfi1
ENSMUSG00000046230	343.639	0.506926	1.42102	0.169302	2.99422	0.00275149	0.0221653	Vps13a		ENSMUSG00000038453	1335.15	-0.590333	0.664189	0.104643	-5.64142	1.69e-08	1.67e-06	Srcin1
ENSMUSG00000020549	1135.83	0.506981	1.42107	0.123785	4.09567	4.20949e-05	0.000957996	Elac2		ENSMUSG00000019189	2915.69	-0.589554	0.664549	0.118598	-4.97103	6.66e-07	3.47e-05	Rnf145
ENSMUSG00000095567	1209.54	0.50761	1.42169	0.143397	3.53989	0.000400291	0.00519634	Noc2l		ENSMUSG00000002732	731.709	-0.585441	0.666446	0.149164	-3.92481	8.68e-05	0.00165914	Fkbp7
ENSMUSG00000030275	6216.2	0.507678	1.42176	0.0755642	6.7185	1.83603e-11	6.51456e-09	Etnk1		ENSMUSG00000031734	217.015	-0.585042	0.66663	0.173125	-3.37931	0.000726686	0.00815016	Irx3
ENSMUSG00000021281	707.501	0.508191	1.42227	0.186022	2.73189	0.00629722	0.0406922	Tnfaip2		ENSMUSG00000026791	472.09	-0.584988	0.666655	0.190553	-3.06995	0.00214095	0.0186442	Slc2a8
ENSMUSG00000022216	4460.66	0.510055	1.4241	0.166114	3.0705	0.00213699	0.0186279	Psme1		ENSMUSG00000060019	173.064	-0.584889	0.666701	0.207034	-2.82509	0.00472675	0.0331063	NA
ENSMUSG00000042167	413.692	0.510713	1.42475	0.160325	3.18549	0.00144512	0.0138158	Papd4		ENSMUSG00000027605	1035.23	-0.583372	0.667402	0.171004	-3.41146	0.000646154	0.0074835	Acss2
ENSMUSG00000044350	479.185	0.511268	1.4253	0.167577	3.05095	0.00228118	0.0194827	Lacc1		ENSMUSG00000028634	277.811	-0.583104	0.667526	0.180511	-3.23029	0.00123666	0.012147	Hivep3
ENSMUSG00000040111	9317.59	0.511833	1.42586	0.171427	2.98572	0.00282915	0.0226159	Gramd1b		ENSMUSG00000036880	5984.1	-0.582436	0.667835	0.12311	-4.73102	2.23e-06	9.25e-05	Acaa2
ENSMUSG00000025287	1520.6	0.513033	1.42705	0.11957	4.29064	1.78156e-05	0.000477079	Acot9		ENSMUSG00000007837	182.134	-0.582221	0.667935	0.191372	-3.04235	0.00234737	0.019917	Prrg2
ENSMUSG00000021998	1042.59	0.513712	1.42772	0.125524	4.09253	4.26684e-05	0.000968226	Lcp1		ENSMUSG00000073633	302.405	-0.581598	0.668223	0.187376	-3.1039	0.00190987	0.0171169	Fbxo36
ENSMUSG00000024640	4767.72	0.514625	1.42862	0.175587	2.93087	0.0033801	0.026008	Psat1		ENSMUSG00000027227	2027.6	-0.580891	0.668551	0.167667	-3.46455	0.000531117	0.00643984	Sord
ENSMUSG00000039384	274.151	0.51565	1.42964	0.191689	2.69004	0.00714441	0.0448126	Dusp10		ENSMUSG00000044475	656.888	-0.580477	0.668743	0.161784	-3.58797	0.000333267	0.00456	Ascc1
ENSMUSG00000028248	1105.82	0.518044	1.43201	0.116707	4.43884	9.04461e-06	0.000274431	Pnisr		ENSMUSG00000050822	449.216	-0.580394	0.668781	0.204572	-2.83711	0.00455233	0.0322596	Slc29a4
ENSMUSG00000053801	603.288	0.518358	1.43232	0.132578	3.90982	9.23631e-05	0.00174784	Grwd1		ENSMUSG00000083022	183.907	-0.58034	0.668806	0.18958	-3.06119	0.00220459	0.0189945	NA
ENSMUSG00000027805	2397.6	0.519931	1.43389	0.121269	4.28743	1.80756e-05	0.000481564	Pfn2		ENSMUSG00000027207	2734.45	-0.580296	0.668827	0.129431	-4.48345	7.34e-06	0.000233055	Galk2
ENSMUSG00000026395	476.572	0.522337	1.43628	0.166251	3.14185	0.00167883	0.0154905	Ptprc		ENSMUSG00000004631	1706.24	-0.579223	0.669324	0.108157	-5.35541	8.54e-08	6.23e-06	Sgce
ENSMUSG00000095362	303.777	0.522881	1.43682	0.182664	2.86253	0.00420267	0.0304182	Gm14325		ENSMUSG00000037992	417.605	-0.579089	0.669386	0.170705	-3.39233	0.000693003	0.00786276	Rara
ENSMUSG00000020876	472.546	0.525742	1.43967	0.133288	3.9444	8.00006e-05	0.00155926	Snx11		ENSMUSG00000068854	798.314	-0.578762	0.669538	0.124662	-4.64267	3.44e-06	0.0001297	Hist2h2be
ENSMUSG00000033624	337.43	0.529526	1.44345	0.186135	2.84485	0.00444328	0.0316939	Pdpr		ENSMUSG00000045257	190.518	-0.578368	0.669721	0.188722	-3.06465	0.00217927	0.0188701	Morn2
ENSMUSG00000027340	3218.03	0.529962	1.44389	0.134543	3.93897	8.1833e-05	0.00158508	Slc23a2		ENSMUSG00000022982	11014.5	-0.577943	0.669918	0.080968	-7.13792	9.48e-13	5.28e-10	Sod1
ENSMUSG00000063229	2577.21	0.530458	1.44439	0.150137	3.53317	0.000410607	0.00528475	Ldha		ENSMUSG00000037826	619.344	-0.577637	0.670061	0.127292	-4.53788	5.68e-06	0.000191184	Ppm1k
ENSMUSG00000057554	2447.34	0.531774	1.44571	0.137726	3.8611	0.000112878	0.0020163	Lgals8		ENSMUSG00000018470	535.702	-0.577096	0.670312	0.159017	-3.62914	0.000284372	0.00404337	Kcnab3
ENSMUSG00000015340	967.261	0.532701	1.44663	0.133672	3.98514	6.74398e-05	0.00137271	Cybb		ENSMUSG00000028407	204.565	-0.576948	0.67038	0.201221	-2.86723	0.00414078	0.0300958	Smim27
ENSMUSG00000055320	1384.71	0.533908	1.44785	0.135267	3.94706	7.91163e-05	0.00154395	Tead1		ENSMUSG00000025260	1886.28	-0.575812	0.670909	0.0905806	-6.3569	2.06e-10	4.29e-08	Hsd17b10
ENSMUSG00000058006	959.539	0.534358	1.4483	0.128287	4.16532	3.10918e-05	0.000756082	Mdn1		ENSMUSG00000025578	376.595	-0.575671	0.670974	0.179187	-3.21268	0.00131501	0.0127833	Cbx8
ENSMUSG00000033769	1218.69	0.534829	1.44877	0.140475	3.80729	0.000140495	0.0024026	Exoc6b		ENSMUSG00000022018	1752.66	-0.575646	0.670986	0.20308	-2.83457	0.00458868	0.0323863	Rgcc
ENSMUSG00000031010	1456.06	0.535059	1.449	0.117585	4.5504	5.35445e-06	0.000183319	Usp9x		ENSMUSG00000021265	376.627	-0.574828	0.671366	0.194668	-2.95286	0.00314841	0.0245397	Slc25a29
ENSMUSG00000061175	158.055	0.535776	1.44972	0.200294	2.67495	0.00747413	0.0462822	Fnip2		ENSMUSG00000052369	1131.47	-0.574586	0.671479	0.127413	-4.50962	6.49e-06	0.000210786	Tmem106c
ENSMUSG00000045827	2046.57	0.536364	1.45031	0.137139	3.9111	9.18759e-05	0.00174074	Serpinb9		ENSMUSG00000096145	352.232	-0.573978	0.671762	0.162179	-3.53917	0.000401392	0.00520476	Vkorc1
ENSMUSG00000035967	619.287	0.537012	1.45096	0.12962	4.14297	3.4283e-05	0.000815894	Ints6l		ENSMUSG00000031785	575.766	-0.572057	0.672657	0.136794	-4.18188	2.89e-05	0.000712857	Adgrg1
ENSMUSG00000040322	3739.31	0.538005	1.45196	0.0895028	6.01104	1.84341e-09	2.8215e-07	Slc25a24		ENSMUSG00000001247	259.648	-0.57153	0.672903	0.190425	-3.00133	0.00268801	0.0217662	Lsr
ENSMUSG00000105987	343.101	0.538162	1.45212	0.19601	2.74559	0.00604024	0.0394232	AI506816		ENSMUSG00000025978	1108.34	-0.571358	0.672983	0.113958	-5.01374	5.34e-07	2.87e-05	Rftn2
ENSMUSG00000001348	409.5	0.53818	1.45214	0.166619	3.23	0.00123788	0.012147	Acp5		ENSMUSG00000022940	1309.21	-0.570938	0.673179	0.144213	-3.95898	7.53e-05	0.00148938	Pigp
ENSMUSG00000026806	250.061	0.538185	1.45214	0.179856	2.99232	0.00276869	0.0222693	Ddx31		ENSMUSG00000097059	267.716	-0.568595	0.674273	0.174573	-3.25707	0.0011257	0.0113164	NA
ENSMUSG00000038181	1119.12	0.538452	1.45241	0.116359	4.62751	3.7008e-06	0.000136588	Chpf2		ENSMUSG00000042429	14115.9	-0.567504	0.674783	0.125742	-4.51326	6.38e-06	0.000209374	Adora1
ENSMUSG00000046380	435.76	0.53967	1.45364	0.166176	3.24759	0.00116387	0.011603	Jrk		ENSMUSG00000075588	574.479	-0.567485	0.674792	0.137331	-4.13223	3.59e-05	0.000849817	Hoxb2
ENSMUSG00000019979	224.25	0.540205	1.45418	0.172238	3.13639	0.00171042	0.01568	Apaf1		ENSMUSG00000061143	275.05	-0.567352	0.674854	0.203639	-2.78606	0.00533525	0.0360616	Maml3
ENSMUSG00000028862	275.294	0.540957	1.45494	0.151427	3.57239	0.00035374	0.00473073	Map3k6		ENSMUSG00000063065	2770.2	-0.567167	0.674941	0.125893	-4.50516	6.63e-06	0.000214379	Mapk3
ENSMUSG00000031207	4040.47	0.542542	1.45654	0.111177	4.88	1.06087e-06	4.94395e-05	Msn		ENSMUSG00000003559	1666.63	-0.564213	0.676324	0.135512	-4.16358	3.13e-05	0.000760692	As3mt
ENSMUSG00000042810	591.023	0.543256	1.45726	0.135923	3.99681	6.42031e-05	0.00131887	Krba1		ENSMUSG00000039652	319.371	-0.563853	0.676493	0.207494	-2.71744	0.00657892	0.0420943	Cpeb3
ENSMUSG00000031799	4066	0.5433	1.4573	0.120421	4.51168	6.43173e-06	0.000209629	Tpm4		ENSMUSG00000027371	1004.95	-0.563691	0.676569	0.121449	-4.64138	3.46e-06	0.000129885	Fahd2a
ENSMUSG00000020064	2824.33	0.543612	1.45762	0.148267	3.66643	0.000245956	0.00365702	Herc4		ENSMUSG00000056666	1822.76	-0.563642	0.676592	0.125091	-4.50586	6.61e-06	0.000214111	Retsat
ENSMUSG00000038539	1771.23	0.543947	1.45796	0.204456	2.66047	0.00780324	0.0476062	Atf5		ENSMUSG00000020877	478.892	-0.562629	0.677067	0.136524	-4.12111	3.77e-05	0.000883849	Scrn2
ENSMUSG00000028069	651.505	0.544435	1.45845	0.180801	3.01123	0.00260188	0.0212896	Gpatch4		ENSMUSG00000024292	509.249	-0.5615	0.677597	0.137909	-4.07152	4.67e-05	0.0010343	Cyp4f14
ENSMUSG00000001473	3005.44	0.544822	1.45884	0.159862	3.40808	0.000654216	0.00754887	Tubb6		ENSMUSG00000002804	345.846	-0.561266	0.677707	0.164783	-3.40609	0.000658996	0.00759281	Nudt14
ENSMUSG00000055447	4441.44	0.545183	1.45921	0.162015	3.36501	0.000765399	0.00844232	Cd47		ENSMUSG00000022048	740.742	-0.560722	0.677963	0.171588	-3.26783	0.00108374	0.0109938	Dpysl2
ENSMUSG00000025647	4066.35	0.54623	1.46027	0.124153	4.39967	1.08416e-05	0.000314343	Shisa5		ENSMUSG00000047379	1140.02	-0.559009	0.678768	0.119853	-4.66412	3.1e-06	0.000119769	B4gat1
ENSMUSG00000014444	514.117	0.548423	1.46249	0.154448	3.55087	0.000383964	0.00502047	Piezo1		ENSMUSG00000003809	1101.68	-0.558294	0.679105	0.139828	-3.9927	6.53e-05	0.00133838	Gcdh
ENSMUSG00000026483	5220.47	0.548631	1.4627	0.11387	4.81807	1.44956e-06	6.41092e-05	Fam129a		ENSMUSG00000005553	153.62	-0.556727	0.679843	0.190906	-2.91623	0.00354287	0.0268762	Atp4a
ENSMUSG00000002897	283.13	0.550463	1.46456	0.182372	3.01835	0.00254153	0.0210161	Il17ra		ENSMUSG00000086119	159.572	-0.556096	0.68014	0.193728	-2.8705	0.0040982	0.029846	NA
ENSMUSG00000031939	621.54	0.552675	1.4668	0.139046	3.97476	7.04516e-05	0.00141556	Taf1d		ENSMUSG00000023044	820.179	-0.555503	0.68042	0.149072	-3.7264	0.000194237	0.00306367	Csad
ENSMUSG00000036402	1412.27	0.553049	1.46718	0.110111	5.02263	5.09682e-07	2.78222e-05	Gng12		ENSMUSG00000021646	1074.32	-0.554991	0.680661	0.130847	-4.24151	2.22e-05	0.000571587	Mccc2
ENSMUSG00000035873	146.93	0.553115	1.46725	0.197478	2.8009	0.00509611	0.0349613	Pawr		ENSMUSG00000016344	728.69	-0.554939	0.680686	0.132871	-4.17653	2.96e-05	0.000725432	Ppdpf
ENSMUSG00000049811	326.162	0.553868	1.46802	0.200204	2.76652	0.00566582	0.0377206	Fam161a		ENSMUSG00000052957	759.573	-0.553711	0.681265	0.160904	-3.44126	0.000579004	0.00692129	Gas1
ENSMUSG00000057561	2253.5	0.555049	1.46922	0.113701	4.88165	1.052e-06	4.9173e-05	Eif1a		ENSMUSG00000030647	3128.96	-0.552432	0.68187	0.0969035	-5.70084	1.19e-08	1.27e-06	Ndufc2
ENSMUSG00000002289	994.238	0.555463	1.46964	0.193967	2.86371	0.00418716	0.03032	Angptl4		ENSMUSG00000038642	1683.85	-0.552029	0.68206	0.126612	-4.36001	1.3e-05	0.000365185	Ctss
ENSMUSG00000038279	816.988	0.555582	1.46976	0.138254	4.01856	5.85549e-05	0.00121726	Nop2		ENSMUSG00000046982	2175.25	-0.552011	0.682069	0.103666	-5.3249	1.01e-07	7.24e-06	Tshz1
ENSMUSG00000028811	2086.22	0.557528	1.47175	0.165999	3.35863	0.000783293	0.00857835	Yars		ENSMUSG00000105814	794.109	-0.551607	0.68226	0.120458	-4.57926	4.67e-06	0.000164446	Mir703
ENSMUSG00000041057	1465.84	0.558302	1.47254	0.108212	5.15932	2.47851e-07	1.54778e-05	Wdr43		ENSMUSG00000040128	1695.36	-0.551569	0.682278	0.124759	-4.42108	9.82e-06	0.000288743	Pnrc1
ENSMUSG00000050244	651.006	0.558791	1.47303	0.108584	5.14618	2.65847e-07	1.62761e-05	Heatr1		ENSMUSG00000042745	937.461	-0.551016	0.682539	0.144701	-3.80797	0.000140115	0.00240118	Id1
ENSMUSG00000048807	361.445	0.559051	1.4733	0.192951	2.89737	0.00376307	0.02811	Slc35e4		ENSMUSG00000028199	423.092	-0.550672	0.682702	0.154966	-3.5535	0.000380135	0.00498293	Cryz
ENSMUSG00000003208	178.303	0.559103	1.47335	0.191868	2.914	0.00356835	0.0270433	Ccdc94		ENSMUSG00000021226	260.41	-0.549733	0.683147	0.149294	-3.68223	0.000231204	0.00351809	Acot2
ENSMUSG00000024981	2423.36	0.559304	1.47356	0.123046	4.54549	5.48068e-06	0.000186246	Acsl5		ENSMUSG00000002781	611.978	-0.548915	0.683534	0.147755	-3.71502	0.000203186	0.00317214	Tmem143
ENSMUSG00000020091	346.352	0.559956	1.47422	0.182501	3.06824	0.00215323	0.0186976	Eif4ebp2		ENSMUSG00000042616	272.655	-0.547907	0.684012	0.154921	-3.5367	0.000405165	0.00523629	Oscp1
ENSMUSG00000026674	376.187	0.560006	1.47427	0.182766	3.06405	0.00218361	0.0188867	Ddr2		ENSMUSG00000037499	1149.36	-0.547147	0.684372	0.101557	-5.3876	7.14e-08	5.36e-06	Nenf
ENSMUSG00000039633	353.887	0.560263	1.47454	0.140715	3.98153	6.84729e-05	0.00138831	Lonrf1		ENSMUSG00000044216	171.611	-0.547025	0.68443	0.204769	-2.67143	0.00755291	0.0466071	Kcnj4
ENSMUSG00000019699	798.031	0.561453	1.47576	0.127481	4.40423	1.06162e-05	0.000308641	Akt3		ENSMUSG00000024962	977.509	-0.546624	0.684621	0.107182	-5.09998	3.4e-07	2.01e-05	Vegfb
ENSMUSG00000037112	245.533	0.56181	1.47612	0.162243	3.46278	0.000534626	0.00647524	Sik2		ENSMUSG00000010362	327.464	-0.545464	0.685171	0.200946	-2.71448	0.00663796	0.0423506	Rdm1
ENSMUSG00000070372	639.188	0.56212	1.47644	0.144037	3.9026	9.51641e-05	0.00178657	Capza1		ENSMUSG00000001870	266.346	-0.545347	0.685227	0.170046	-3.20706	0.00134097	0.0129687	Ltbp1
ENSMUSG00000020812	189.471	0.562479	1.4768	0.195259	2.88068	0.00396818	0.0292223	1810032O08Rik		ENSMUSG00000013622	2158.25	-0.54507	0.685358	0.127911	-4.26133	2.03e-05	0.000528761	Atraid
ENSMUSG00000093661	909.443	0.563148	1.47749	0.15242	3.69472	0.00022013	0.00338145	Eif4e3		ENSMUSG00000047473	201.173	-0.541739	0.686942	0.178091	-3.04192	0.00235071	0.0199344	Zfp30
ENSMUSG00000097124	415.938	0.564144	1.47851	0.185422	3.04249	0.00234631	0.019917	NA		ENSMUSG00000073535	256.891	-0.541727	0.686948	0.185383	-2.9222	0.00347569	0.0265472	Gm5532
ENSMUSG00000024188	1016.1	0.566087	1.4805	0.131366	4.30923	1.63824e-05	0.000447136	Luc7l		ENSMUSG00000020063	605.272	-0.541304	0.68715	0.193066	-2.80372	0.0050516	0.0346963	Sirt1
ENSMUSG00000021215	1893.38	0.566997	1.48144	0.166018	3.41528	0.000637166	0.00740829	Net1		ENSMUSG00000069835	203.193	-0.540969	0.687309	0.179129	-3.02	0.00252778	0.0209468	Sat2
ENSMUSG00000050910	1263.21	0.567966	1.48243	0.10879	5.22076	1.78188e-07	1.16885e-05	Cdr2l		ENSMUSG00000028295	443.291	-0.540216	0.687668	0.131674	-4.10266	4.08e-05	0.000939083	Smim8
ENSMUSG00000034612	4274.73	0.568533	1.48301	0.121683	4.67225	2.97918e-06	0.000115903	Chst11		ENSMUSG00000032526	490.416	-0.540047	0.687749	0.163127	-3.31058	0.000931023	0.00979456	Ss18l2
ENSMUSG00000042726	810.239	0.569548	1.48406	0.170948	3.33171	0.000863136	0.00921702	Trafd1		ENSMUSG00000025731	2608.59	-0.538547	0.688464	0.1247	-4.31875	1.57e-05	0.000432729	Mettl26
ENSMUSG00000052105	161.868	0.569616	1.48413	0.192754	2.95514	0.00312525	0.0244323	Mtcl1		ENSMUSG00000046329	1623.99	-0.538429	0.68852	0.161509	-3.33373	0.000856896	0.00918809	Slc25a23
ENSMUSG00000021725	254.581	0.569714	1.48423	0.176341	3.23075	0.00123464	0.012147	Parp8		ENSMUSG00000030720	243.806	-0.538274	0.688594	0.194795	-2.76329	0.0057222	0.0379631	Cln3
ENSMUSG00000002602	1343.24	0.571601	1.48617	0.159638	3.5806	0.000342803	0.00464569	Axl		ENSMUSG00000038286	1453.89	-0.538052	0.6887	0.124932	-4.30674	1.66e-05	0.0004514	Bphl
ENSMUSG00000062203	2774.51	0.572148	1.48674	0.0995016	5.75014	8.91698e-09	9.87318e-07	Gspt1		ENSMUSG00000031851	522.311	-0.537522	0.688953	0.139466	-3.85415	0.000116132	0.00206734	Ntpcr
ENSMUSG00000017715	1285.47	0.573086	1.4877	0.145895	3.92808	8.56281e-05	0.00164634	Pgs1		ENSMUSG00000108358	162.677	-0.537145	0.689133	0.181497	-2.95953	0.0030811	0.0241753	NA
ENSMUSG00000031167	1548.74	0.575356	1.49004	0.122093	4.71242	2.44787e-06	9.87496e-05	Rbm3		ENSMUSG00000049225	1931.75	-0.536097	0.689634	0.162312	-3.30288	0.000956974	0.0100338	Pdp1
ENSMUSG00000036718	376.126	0.578384	1.49318	0.160067	3.61339	0.000302217	0.00423158	Micall2		ENSMUSG00000024985	483.556	-0.535936	0.689711	0.149467	-3.58565	0.000336239	0.00458059	Tcf7l2
ENSMUSG00000024805	196.628	0.579032	1.49385	0.196331	2.94926	0.00318539	0.0247415	Pcgf5		ENSMUSG00000032382	3499.86	-0.535902	0.689727	0.106655	-5.02462	5.04e-07	2.76e-05	Snx1
ENSMUSG00000027339	187.492	0.579649	1.49449	0.185776	3.12016	0.00180753	0.0164065	Rassf2		ENSMUSG00000006386	1527.17	-0.53557	0.689886	0.120015	-4.46252	8.1e-06	0.00025141	Tek
ENSMUSG00000026421	1124.24	0.580725	1.4956	0.172857	3.35956	0.000780663	0.00857082	Csrp1		ENSMUSG00000003316	5702.46	-0.534982	0.690167	0.137062	-3.90321	9.49e-05	0.00178551	Glg1
ENSMUSG00000034295	155.649	0.581803	1.49672	0.207733	2.80073	0.00509874	0.0349613	Fhod3		ENSMUSG00000047793	464.251	-0.534744	0.690281	0.176851	-3.02369	0.00249709	0.0207475	Sned1
ENSMUSG00000027951	1315.32	0.583485	1.49846	0.163432	3.5702	0.000356709	0.00475978	Adar		ENSMUSG00000001270	1028.01	-0.534703	0.690301	0.145543	-3.67384	0.000238936	0.00359276	Ckb
ENSMUSG00000018920	484.336	0.584179	1.49919	0.179694	3.25096	0.00115014	0.0115087	Cxcl16		ENSMUSG00000064345	192357	-0.534488	0.690404	0.132522	-4.03321	5.5e-05	0.00116573	ND2
ENSMUSG00000020869	3144.25	0.584423	1.49944	0.117672	4.96654	6.81576e-07	3.53228e-05	Lrrc59		ENSMUSG00000030035	1127.43	-0.53425	0.690518	0.149251	-3.57953	0.000344208	0.00465656	Wbp1
ENSMUSG00000042354	1375.65	0.584738	1.49977	0.107344	5.44733	5.11316e-08	4.2014e-06	Gnl3		ENSMUSG00000009545	485.879	-0.53395	0.690661	0.174178	-3.06554	0.00217275	0.018824	Kcnq1
ENSMUSG00000097099	166.949	0.585352	1.50041	0.218716	2.67631	0.00744371	0.0461889	NA		ENSMUSG00000020829	747.921	-0.533783	0.690741	0.127087	-4.20015	2.67e-05	0.000665218	Slc46a1
ENSMUSG00000019990	162.789	0.588803	1.504	0.214107	2.75004	0.00595875	0.03902	Pde7b		ENSMUSG00000021025	1770.92	-0.533038	0.691098	0.111365	-4.7864	1.7e-06	7.26e-05	Nfkbia
ENSMUSG00000025870	451.72	0.589224	1.50444	0.162009	3.63698	0.000275854	0.00395467	Arl10		ENSMUSG00000050052	867.193	-0.532734	0.691243	0.136115	-3.91386	9.08e-05	0.00172518	Tdrp
ENSMUSG00000042719	1135.85	0.58968	1.50491	0.139252	4.23462	2.28938e-05	0.000585932	Naa25		ENSMUSG00000054723	959.121	-0.531759	0.691711	0.139483	-3.81236	0.000137649	0.00237718	Vmac
ENSMUSG00000038736	455.008	0.591032	1.50632	0.130027	4.54544	5.482e-06	0.000186246	Nudcd1		ENSMUSG00000102101	184.584	-0.531588	0.691793	0.185176	-2.87072	0.00409542	0.029846	Zbtb11os1
ENSMUSG00000020527	147.836	0.593367	1.50876	0.195326	3.03783	0.00238292	0.0201223	Myo19		ENSMUSG00000044408	2875.96	-0.530594	0.69227	0.124341	-4.26726	1.98e-05	0.00051924	Sptssa
ENSMUSG00000001998	242.036	0.594331	1.50977	0.193466	3.07202	0.00212615	0.0185731	Ap4e1		ENSMUSG00000033191	1244.08	-0.528753	0.693154	0.141016	-3.74958	0.00017713	0.00285677	Tie1
ENSMUSG00000031538	716.07	0.595575	1.51107	0.193155	3.08341	0.00204644	0.0180401	Plat		ENSMUSG00000035062	160.865	-0.528289	0.693377	0.188683	-2.79988	0.00511214	0.0350047	Zc4h2
ENSMUSG00000017677	841.536	0.595612	1.51111	0.123081	4.83919	1.3037e-06	5.81526e-05	Wsb1		ENSMUSG00000074264	421.995	-0.527826	0.693599	0.14376	-3.67159	0.000241047	0.00361154	Amy1
ENSMUSG00000037997	514.052	0.598538	1.51418	0.197431	3.03164	0.00243232	0.0203939	Parp11		ENSMUSG00000025277	1576.28	-0.526778	0.694103	0.090332	-5.83158	5.49e-09	6.64e-07	Abhd6
ENSMUSG00000069793	1070.46	0.601002	1.51677	0.174735	3.43951	0.000582763	0.00693981	Slfn9		ENSMUSG00000047638	779.837	-0.524712	0.695098	0.128202	-4.09285	4.26e-05	0.000968226	Nr1h4
ENSMUSG00000025591	231.989	0.60161	1.51741	0.198958	3.0238	0.00249624	0.0207475	Tma16		ENSMUSG00000021830	850.427	-0.524325	0.695284	0.142552	-3.67814	0.000234942	0.00355763	Txndc16
ENSMUSG00000024427	474.837	0.60277	1.51863	0.128459	4.69232	2.70123e-06	0.000107307	Spry4		ENSMUSG00000061848	499.694	-0.524159	0.695365	0.135536	-3.86731	0.000110044	0.00198156	LOC102634709
ENSMUSG00000024601	1259.45	0.603036	1.51891	0.113271	5.32383	1.01606e-07	7.24327e-06	Isoc1		ENSMUSG00000026032	1553.66	-0.523642	0.695614	0.114071	-4.5905	4.42e-06	0.000157826	Ndufb3
ENSMUSG00000049957	655.41	0.603832	1.51975	0.150251	4.01882	5.84914e-05	0.00121726	Ccdc137		ENSMUSG00000033152	2081.69	-0.523428	0.695717	0.103968	-5.03451	4.79e-07	2.68e-05	Podxl2
ENSMUSG00000034674	133.553	0.604574	1.52053	0.203991	2.96372	0.00303941	0.023917	Tdg		ENSMUSG00000001119	5723.8	-0.522319	0.696252	0.128186	-4.07471	4.61e-05	0.0010217	Col6a1
ENSMUSG00000031328	2797.38	0.605426	1.52143	0.113871	5.31679	1.05614e-07	7.42724e-06	Flna		ENSMUSG00000021900	1010.93	-0.522275	0.696273	0.117699	-4.43739	9.11e-06	0.000274431	Btd
ENSMUSG00000001627	2274.25	0.606095	1.52213	0.111794	5.42154	5.90894e-08	4.69898e-06	Ifrd1		ENSMUSG00000085795	3028.72	-0.522142	0.696337	0.162027	-3.22256	0.00127052	0.0124126	Zfp703
ENSMUSG00000049608	208.133	0.608098	1.52425	0.185682	3.27494	0.00105686	0.0107982	Gpr55		ENSMUSG00000073481	3979.08	-0.521948	0.696431	0.0951185	-5.48734	4.08e-08	3.48e-06	2020-03-02
ENSMUSG00000034898	681.279	0.611033	1.52735	0.209558	2.91581	0.00354764	0.0268993	Filip1		ENSMUSG00000020620	424.363	-0.521549	0.696624	0.194697	-2.67878	0.0073892	0.0459237	Abca8b
ENSMUSG00000028633	1647.07	0.612995	1.52943	0.125883	4.86955	1.11851e-06	5.12086e-05	Ctps		ENSMUSG00000039159	1964.17	-0.521095	0.696843	0.0957351	-5.44309	5.24e-08	4.26e-06	Ube2h
ENSMUSG00000004040	1855.14	0.614245	1.53076	0.158777	3.86859	0.000109464	0.00197567	Stat3		ENSMUSG00000048546	1225.47	-0.52076	0.697005	0.128567	-4.05049	5.11e-05	0.0011067	Tob2
ENSMUSG00000022032	1383.99	0.616125	1.53275	0.185335	3.32439	0.000886122	0.0094153	Scara5		ENSMUSG00000054452	19698	-0.520496	0.697132	0.0954501	-5.45306	4.95e-08	4.09e-06	Aes
ENSMUSG00000004952	443.804	0.618397	1.53517	0.175816	3.51729	0.00043597	0.00555168	Rasa4		ENSMUSG00000052160	191.415	-0.520418	0.69717	0.195703	-2.65922	0.00783217	0.0477081	Pld4
ENSMUSG00000078700	121.026	0.620008	1.53688	0.22167	2.79699	0.00515809	0.0351345	D030028A08Rik		ENSMUSG00000046668	403.608	-0.519956	0.697393	0.193452	-2.68778	0.00719291	0.045028	Cxxc5
ENSMUSG00000102976	143.47	0.620154	1.53704	0.211646	2.93015	0.00338799	0.026043	Zc3h11a		ENSMUSG00000038319	692.571	-0.519136	0.69779	0.159925	-3.24611	0.00116994	0.0116433	Kcnh2
ENSMUSG00000039218	3706.07	0.620684	1.5376	0.127296	4.87589	1.08319e-06	5.00657e-05	Srrm2		ENSMUSG00000036181	2658.66	-0.518991	0.69786	0.140494	-3.69405	0.000220708	0.00338145	Hist1h1c
ENSMUSG00000079499	156.5	0.620714	1.53764	0.21767	2.85163	0.0043496	0.0311638	6530402F18Rik		ENSMUSG00000049624	417.134	-0.5181	0.698291	0.145509	-3.56061	0.000369996	0.00489108	Slc17a5
ENSMUSG00000034220	986.028	0.62126	1.53822	0.131679	4.718	2.38174e-06	9.6581e-05	Gpc1		ENSMUSG00000040249	3478.49	-0.517851	0.698411	0.121213	-4.27225	1.94e-05	0.000510311	Lrp1
ENSMUSG00000057596	1244.46	0.622615	1.53966	0.163392	3.81056	0.000138651	0.00238545	Trim30d		ENSMUSG00000028393	2312.24	-0.517812	0.69843	0.110458	-4.68787	2.76e-06	0.000109109	Alad
ENSMUSG00000035021	285.973	0.623649	1.54077	0.176506	3.53331	0.000410394	0.00528475	Baz1a		ENSMUSG00000036968	469.528	-0.517608	0.698529	0.159412	-3.24699	0.00116634	0.0116203	Cnpy4
ENSMUSG00000024949	553.166	0.62428	1.54144	0.133029	4.69281	2.69483e-06	0.000107307	Sf1		ENSMUSG00000028381	2483	-0.517592	0.698537	0.145401	-3.55976	0.000371189	0.00489856	Ugcg
ENSMUSG00000060675	1343.88	0.624651	1.54184	0.168388	3.7096	0.000207589	0.00322797	Pla2g16		ENSMUSG00000004032	825.05	-0.517547	0.698559	0.127407	-4.06217	4.86e-05	0.00106931	Gstm5
ENSMUSG00000038587	381.876	0.624778	1.54197	0.190545	3.2789	0.00104213	0.0106827	Akap12		ENSMUSG00000070737	369.555	-0.51753	0.698567	0.168351	-3.07412	0.00211126	0.0184863	Tmem35b
ENSMUSG00000014547	167.664	0.624846	1.54205	0.214737	2.90981	0.00361646	0.0272909	Wdfy2		ENSMUSG00000038677	988.322	-0.517064	0.698792	0.141119	-3.66402	0.000248285	0.00368451	Scube3
ENSMUSG00000043747	324.126	0.625518	1.54276	0.155001	4.03557	5.44697e-05	0.00115698	1520401A03Rik		ENSMUSG00000028024	491.796	-0.516514	0.699059	0.189355	-2.72776	0.00637662	0.0410185	Enpep
ENSMUSG00000040987	127.788	0.626734	1.54407	0.226084	2.77213	0.00556911	0.0373315	Mill2		ENSMUSG00000022964	2064.34	-0.516276	0.699174	0.168942	-3.05594	0.00224355	0.0192558	Tmem50b
ENSMUSG00000027346	505.939	0.628711	1.54618	0.129131	4.86877	1.12297e-06	5.12627e-05	Gpcpd1		ENSMUSG00000107283	1924.45	-0.51548	0.69956	0.140282	-3.67459	0.000238229	0.00359276	Mpv17
ENSMUSG00000059866	346.933	0.628712	1.54618	0.17704	3.55124	0.000383416	0.00501751	Tnip2		ENSMUSG00000040883	5137.88	-0.515211	0.699691	0.115089	-4.47664	7.58e-06	0.000239643	Tmem205
ENSMUSG00000038335	1071.14	0.631818	1.54952	0.136511	4.62833	3.68623e-06	0.000136373	Tsr1		ENSMUSG00000041126	1398.66	-0.515073	0.699758	0.12257	-4.20227	2.64e-05	0.000661123	H2afv
ENSMUSG00000021134	3616.98	0.634535	1.55244	0.11447	5.54323	2.96935e-08	2.649e-06	Srsf5		ENSMUSG00000058351	289.266	-0.51406	0.700249	0.148927	-3.45175	0.000556964	0.00670936	Smim4
ENSMUSG00000040552	399.617	0.634711	1.55263	0.233557	2.71758	0.00657612	0.0420936	C3ar1		ENSMUSG00000020034	782.999	-0.513508	0.700517	0.11477	-4.47425	7.67e-06	0.000241361	Tcp11l2
ENSMUSG00000000290	203.647	0.637395	1.55552	0.201759	3.15919	0.00158207	0.0148522	Itgb2		ENSMUSG00000025035	1404.28	-0.513202	0.700665	0.125937	-4.07508	4.6e-05	0.0010217	Arl3
ENSMUSG00000026121	789.395	0.639868	1.55819	0.206792	3.09425	0.00197308	0.017532	Sema4c		ENSMUSG00000027848	605.991	-0.511495	0.701495	0.183303	-2.79044	0.0052637	0.035667	Olfml3
ENSMUSG00000024424	828.665	0.646137	1.56497	0.155786	4.14759	3.35992e-05	0.000804525	Ttc39c		ENSMUSG00000020895	228.334	-0.511442	0.701521	0.16475	-3.10435	0.001907	0.0171104	Tmem107
ENSMUSG00000017057	442.363	0.647899	1.56688	0.186641	3.47135	0.000517841	0.00631388	Il13ra1		ENSMUSG00000034165	6625.48	-0.510809	0.701829	0.0811393	-6.29546	3.06e-10	6.21e-08	Ccnd3
ENSMUSG00000058672	173.874	0.649158	1.56825	0.222433	2.91844	0.00351782	0.0267773	Tubb2a		ENSMUSG00000037152	2312.62	-0.510616	0.701923	0.101936	-5.00919	5.47e-07	2.91e-05	Ndufc1
ENSMUSG00000034163	606.617	0.651808	1.57114	0.136994	4.75794	1.95574e-06	8.22993e-05	Zfc3h1		ENSMUSG00000019278	613.624	-0.510008	0.702218	0.135321	-3.76889	0.000163977	0.00269191	Dpep1
ENSMUSG00000039501	1559.14	0.652818	1.57224	0.159198	4.10067	4.11949e-05	0.000943013	Znfx1		ENSMUSG00000066894	1030.79	-0.509601	0.702416	0.118504	-4.3003	1.71e-05	0.000462388	Vsig10
ENSMUSG00000044317	213.934	0.655612	1.57528	0.168327	3.89488	9.8248e-05	0.00182601	Gpr4		ENSMUSG00000040007	1510.45	-0.509377	0.702526	0.126544	-4.02529	5.69e-05	0.00119408	Bahd1
ENSMUSG00000004266	257.728	0.656121	1.57584	0.208954	3.14003	0.00168932	0.0155505	Ptpn6		ENSMUSG00000023571	327.477	-0.508137	0.70313	0.141472	-3.5918	0.000328407	0.00451328	C1qtnf12
ENSMUSG00000063895	444.971	0.65698	1.57678	0.140906	4.66254	3.12326e-06	0.000120396	NA		ENSMUSG00000019872	746.151	-0.507191	0.703591	0.163888	-3.09474	0.00196988	0.0175135	Smpdl3a
ENSMUSG00000041702	368.984	0.659557	1.5796	0.188826	3.49293	0.000477745	0.00596629	Btbd7		ENSMUSG00000033585	2920.97	-0.50693	0.703718	0.150819	-3.36118	0.000776094	0.00852665	Ndn
ENSMUSG00000028978	190.124	0.660101	1.58019	0.239433	2.75694	0.00583459	0.0384831	Nos3		ENSMUSG00000029385	465.167	-0.506739	0.703812	0.164058	-3.08877	0.00200987	0.0177763	Ccng2
ENSMUSG00000022469	299.265	0.660156	1.58025	0.188917	3.49442	0.000475097	0.00594328	Rapgef3		ENSMUSG00000015149	1459.87	-0.506375	0.703989	0.11166	-4.53498	5.76e-06	0.000193006	Sirt2
ENSMUSG00000004936	2801.8	0.660528	1.58066	0.134138	4.92426	8.46818e-07	4.14436e-05	Map2k1		ENSMUSG00000036944	455.809	-0.506338	0.704007	0.167017	-3.03166	0.00243209	0.0203939	Tmem71
ENSMUSG00000022503	723.746	0.660787	1.58094	0.136738	4.83249	1.34835e-06	5.99728e-05	Nubp1		ENSMUSG00000024038	1269.58	-0.505855	0.704243	0.118938	-4.25311	2.11e-05	0.000545826	Ndufv3
ENSMUSG00000022864	212.961	0.661539	1.58177	0.223936	2.95415	0.00313536	0.0244869	D16Ertd472e		ENSMUSG00000032192	1676.4	-0.505814	0.704263	0.110092	-4.59445	4.34e-06	0.000156805	Gnb5
ENSMUSG00000005973	1992.27	0.662249	1.58255	0.15053	4.39945	1.08526e-05	0.000314343	Rcn1		ENSMUSG00000036905	1227.78	-0.505476	0.704428	0.182849	-2.76445	0.00570192	0.037864	C1qb
ENSMUSG00000001415	1159.82	0.663715	1.58416	0.120652	5.50109	3.77456e-08	3.23783e-06	Smg5		ENSMUSG00000020376	2758.5	-0.505408	0.704461	0.121024	-4.17609	2.97e-05	0.000725682	Rnf130
ENSMUSG00000048279	269.564	0.665489	1.58611	0.149562	4.44959	8.60338e-06	0.000263364	Sacs		ENSMUSG00000027954	340.284	-0.503963	0.705167	0.1655	-3.0451	0.00232604	0.019779	Efna1
ENSMUSG00000042406	4983.79	0.665923	1.58658	0.153979	4.32476	1.52696e-05	0.000423425	Atf4		ENSMUSG00000078695	891.56	-0.503836	0.705229	0.118886	-4.23797	2.26e-05	0.00057871	Cisd3
ENSMUSG00000029402	145.338	0.666582	1.58731	0.23802	2.80053	0.00510183	0.0349648	Snrnp35		ENSMUSG00000026278	469.464	-0.503651	0.705319	0.150416	-3.34839	0.000812824	0.00881849	Bok
ENSMUSG00000026620	192.54	0.670426	1.59154	0.187754	3.57077	0.000355929	0.00475344	Mark1		ENSMUSG00000042348	747.531	-0.503108	0.705585	0.148521	-3.38746	0.000705428	0.00796323	Arl15
ENSMUSG00000024999	501.921	0.671409	1.59263	0.133507	5.02903	4.92967e-07	2.7195e-05	Noc3l		ENSMUSG00000030086	782.167	-0.502097	0.70608	0.144081	-3.48483	0.000492447	0.00610165	Chchd6
ENSMUSG00000028948	651.97	0.673168	1.59457	0.142093	4.73751	2.16359e-06	9.00745e-05	Nol9		ENSMUSG00000027428	1174.62	-0.501792	0.706229	0.134568	-3.7289	0.000192314	0.00303887	Rbbp9
ENSMUSG00000042041	191.995	0.675094	1.5967	0.201312	3.35347	0.000798054	0.00871274	2010003K11Rik		ENSMUSG00000010911	494.558	-0.501725	0.706262	0.136806	-3.66742	0.000245009	0.00364641	Apip
ENSMUSG00000042759	121.209	0.675386	1.59702	0.244424	2.76318	0.00572414	0.0379631	Apobr		ENSMUSG00000018604	11636.6	-0.500714	0.706757	0.101392	-4.93839	7.88e-07	3.94e-05	Tbx3
ENSMUSG00000026648	155.412	0.677763	1.59966	0.198103	3.42127	0.000623289	0.00729306	Dclre1c		ENSMUSG00000001039	208.337	-0.500551	0.706837	0.17923	-2.79278	0.00522569	0.0354752	B9d1
ENSMUSG00000027722	416.946	0.678313	1.60027	0.139133	4.87528	1.08657e-06	5.00657e-05	Spata5		ENSMUSG00000026727	980.781	-0.499787	0.707211	0.150345	-3.32426	0.000886529	0.0094153	Rsu1
ENSMUSG00000005087	2105.68	0.681987	1.60435	0.161143	4.23218	2.3144e-05	0.000591365	Cd44		ENSMUSG00000001289	3652.63	-0.499438	0.707382	0.10284	-4.85644	1.2e-06	5.39e-05	Pfdn5
ENSMUSG00000027366	7029.92	0.682062	1.60443	0.146869	4.64401	3.4171e-06	0.000129485	Sppl2a		ENSMUSG00000039670	285.908	-0.497795	0.708188	0.172371	-2.88794	0.00387776	0.0287462	Oxld1
ENSMUSG00000054728	158.123	0.682134	1.60451	0.256293	2.66155	0.00777827	0.0475272	Phactr1		ENSMUSG00000026817	1923.11	-0.497657	0.708256	0.121021	-4.11216	3.92e-05	0.00090793	Ak1
ENSMUSG00000036545	131.288	0.683883	1.60646	0.23703	2.88521	0.00391147	0.0289412	Adamts2		ENSMUSG00000026255	9775.13	-0.495659	0.709238	0.122516	-4.04568	5.22e-05	0.00112037	Efhd1
ENSMUSG00000033166	517.072	0.687695	1.61071	0.129091	5.32721	9.97343e-08	7.20857e-06	Dis3		ENSMUSG00000067924	485.612	-0.49486	0.70963	0.128998	-3.83618	0.000124963	0.00219205	Rtl8b
ENSMUSG00000033066	892.518	0.688246	1.61132	0.223256	3.08277	0.00205087	0.0180486	Gas7		ENSMUSG00000052911	1388.27	-0.49442	0.709847	0.136342	-3.62633	0.000287482	0.00405802	Lamb2
ENSMUSG00000039997	620.288	0.688609	1.61173	0.174737	3.94083	8.11997e-05	0.00157673	Ifi203		ENSMUSG00000027488	640.117	-0.494271	0.70992	0.13236	-3.73431	0.000188233	0.00298647	Snta1
ENSMUSG00000037851	1365.4	0.689186	1.61237	0.167231	4.12116	3.76971e-05	0.000883849	Iars		ENSMUSG00000050953	1642.35	-0.493896	0.710105	0.161334	-3.06133	0.00220353	0.0189945	Gja1
ENSMUSG00000035954	343.455	0.69751	1.6217	0.169958	4.104	4.06059e-05	0.000935015	Dock4		ENSMUSG00000028070	1796.26	-0.493286	0.710405	0.115276	-4.27917	1.88e-05	0.00049638	Naxe
ENSMUSG00000042680	264.804	0.698827	1.62318	0.194965	3.58437	0.000337899	0.00459119	Garem1		ENSMUSG00000041840	364.934	-0.493088	0.710503	0.164704	-2.99378	0.00275549	0.022186	Haus1
ENSMUSG00000022772	291.136	0.699987	1.62449	0.164177	4.26362	2.01145e-05	0.00052526	Senp5		ENSMUSG00000020150	2694.57	-0.492844	0.710623	0.0917006	-5.37449	7.68e-08	5.71e-06	Gamt
ENSMUSG00000010080	505.667	0.70233	1.62713	0.167367	4.19634	2.71263e-05	0.000674001	Epn3		ENSMUSG00000024140	4777.42	-0.492544	0.71077	0.100277	-4.91185	9.02e-07	4.35e-05	Epas1
ENSMUSG00000061950	903.998	0.705746	1.63099	0.11694	6.03508	1.5888e-09	2.45587e-07	Ppp4r1		ENSMUSG00000028013	1104.58	-0.492041	0.711018	0.127385	-3.86262	0.000112179	0.00200611	Ppa2
ENSMUSG00000048865	198.211	0.706067	1.63135	0.21242	3.32392	0.000887618	0.00942045	Arhgap30		ENSMUSG00000006395	429.725	-0.491958	0.711059	0.155856	-3.1565	0.00159676	0.0149452	Hyi
ENSMUSG00000044795	151.402	0.707043	1.63246	0.244534	2.89139	0.00383545	0.028541	Cyb5d1		ENSMUSG00000004319	2269.1	-0.491651	0.711211	0.160093	-3.07103	0.0021332	0.0186158	Clcn3
ENSMUSG00000022831	422.525	0.707965	1.6335	0.134771	5.2531	1.49557e-07	1.00641e-05	Hcls1		ENSMUSG00000006715	297.698	-0.491512	0.711279	0.18246	-2.69381	0.00706414	0.0444878	Gmnn
ENSMUSG00000047466	412.735	0.708246	1.63382	0.133366	5.31055	1.09297e-07	7.65174e-06	8030462N17Rik		ENSMUSG00000004043	523.418	-0.49145	0.71131	0.1491	-3.29612	0.00098029	0.0102165	Stat5a
ENSMUSG00000058715	533.772	0.70946	1.63519	0.191823	3.69851	0.000216866	0.00333897	Fcer1g		ENSMUSG00000030409	2157.73	-0.491032	0.711516	0.161192	-3.04625	0.00231716	0.0197142	Dmpk
ENSMUSG00000024691	156.026	0.709825	1.63561	0.200586	3.53877	0.000402002	0.00520834	Fam111a		ENSMUSG00000056313	1796.66	-0.490871	0.711595	0.142859	-3.43606	0.000590234	0.0070074	Tcim
ENSMUSG00000015536	3445.84	0.71023	1.63606	0.182593	3.88968	0.000100376	0.00185233	Mocs2		ENSMUSG00000057098	1202.17	-0.490844	0.711609	0.0968385	-5.06869	4.01e-07	2.32e-05	Ebf1
ENSMUSG00000024165	722.476	0.710513	1.63639	0.158257	4.48963	7.13472e-06	0.000228253	Jpt2		ENSMUSG00000022820	509.872	-0.490772	0.711644	0.128994	-3.80462	0.000142022	0.00242322	Ndufb4
ENSMUSG00000002847	376.805	0.712624	1.63878	0.203146	3.50795	0.000451579	0.00570854	Pla1a		ENSMUSG00000031755	423.02	-0.489978	0.712036	0.160479	-3.05323	0.00226394	0.0193996	Bbs2
ENSMUSG00000028064	174.648	0.712859	1.63905	0.232457	3.06662	0.00216491	0.018777	Sema4a		ENSMUSG00000005803	1228.46	-0.488913	0.712562	0.128289	-3.81104	0.000138386	0.00238463	Sqor
ENSMUSG00000028034	2953.28	0.713034	1.63925	0.136112	5.23857	1.61829e-07	1.0751e-05	Fubp1		ENSMUSG00000037278	706.951	-0.488741	0.712647	0.168612	-2.89861	0.00374823	0.0280524	Tmem97
ENSMUSG00000001493	203.722	0.714238	1.64062	0.244849	2.91706	0.00353352	0.0268313	Meox1		ENSMUSG00000039168	1954.49	-0.488405	0.712813	0.133569	-3.65657	0.000255608	0.00375758	Dap
ENSMUSG00000033781	737.395	0.716738	1.64346	0.1618	4.42978	9.43273e-06	0.000281038	Asb13		ENSMUSG00000050373	1038.14	-0.488398	0.712816	0.108707	-4.49281	7.03e-06	0.000225332	Snx21
ENSMUSG00000085156	152.831	0.717552	1.64439	0.269461	2.66292	0.00774668	0.0473722	Snhg15		ENSMUSG00000068220	6542.36	-0.488305	0.712862	0.107146	-4.5574	5.18e-06	0.000178886	Lgals1
ENSMUSG00000031441	4616.12	0.718422	1.64538	0.113993	6.30235	2.93172e-10	6.02237e-08	Atp11a		ENSMUSG00000035936	628.29	-0.48804	0.712993	0.177064	-2.75629	0.00584608	0.0385427	Aldh5a1
ENSMUSG00000039232	203.032	0.719266	1.64634	0.270007	2.66388	0.00772452	0.0473082	Stx11		ENSMUSG00000027562	1360.83	-0.487761	0.713131	0.164689	-2.9617	0.00305943	0.024026	Car2
ENSMUSG00000040253	2203.54	0.720678	1.64796	0.199344	3.61525	0.000300056	0.00420509	Gbp7		ENSMUSG00000022037	13576.7	-0.487729	0.713147	0.110278	-4.4227	9.75e-06	0.000287124	Clu
ENSMUSG00000040675	229.488	0.721421	1.6488	0.203112	3.55184	0.000382543	0.00501029	Mthfd1l		ENSMUSG00000004637	577.361	-0.487199	0.713409	0.125081	-3.89507	9.82e-05	0.00182601	Wwox
ENSMUSG00000036208	215.163	0.721492	1.64889	0.168066	4.29291	1.7635e-05	0.000475506	Nepro		ENSMUSG00000029822	3936.37	-0.486595	0.713708	0.101661	-4.78643	1.7e-06	7.26e-05	Osbpl3
ENSMUSG00000056413	136.798	0.722805	1.65039	0.215214	3.35854	0.000783546	0.00857835	Adap1		ENSMUSG00000060002	3303.87	-0.485706	0.714147	0.161847	-3.00101	0.00269082	0.0217711	Chpt1
ENSMUSG00000051790	510.237	0.723559	1.65125	0.186627	3.87703	0.000105738	0.00192174	Nlgn2		ENSMUSG00000042903	769.384	-0.485611	0.714194	0.109559	-4.43242	9.32e-06	0.000278684	Foxo4
ENSMUSG00000055491	475.301	0.723709	1.65142	0.143887	5.02969	4.91283e-07	2.7195e-05	Pprc1		ENSMUSG00000051989	700.096	-0.485584	0.714208	0.118895	-4.08413	4.42e-05	0.000993526	Smim11
ENSMUSG00000020075	2305.75	0.724185	1.65197	0.0995718	7.27299	3.51605e-13	2.61393e-10	Ddx21		ENSMUSG00000049670	439.369	-0.485246	0.714375	0.146773	-3.3061	0.000946044	0.00993919	Morn4
ENSMUSG00000004383	597.183	0.725375	1.65333	0.13442	5.39633	6.80187e-08	5.12999e-06	Large1		ENSMUSG00000021974	453.001	-0.483415	0.715282	0.165143	-2.92725	0.0034197	0.026235	Fgf9
ENSMUSG00000010755	839.467	0.727598	1.65588	0.200467	3.62952	0.000283953	0.00404337	Cars		ENSMUSG00000022270	1193.48	-0.483229	0.715375	0.157946	-3.05946	0.00221739	0.0190732	Retreg1
ENSMUSG00000063286	537.676	0.730101	1.65876	0.17846	4.09111	4.29314e-05	0.000972145	NA		ENSMUSG00000079057	880.364	-0.48294	0.715518	0.153088	-3.15465	0.00160693	0.0150044	Cyp4v3
ENSMUSG00000029544	575.193	0.730263	1.65894	0.174405	4.18716	2.82464e-05	0.000697756	Cabp1		ENSMUSG00000036764	447.167	-0.482816	0.715579	0.158201	-3.05191	0.0022739	0.0194521	Dnajc12
ENSMUSG00000024486	218.208	0.730678	1.65942	0.184914	3.95144	7.76815e-05	0.00152166	Hbegf		ENSMUSG00000020205	1670.04	-0.482787	0.715594	0.167462	-2.88297	0.00393946	0.0290809	Phlda1
ENSMUSG00000031805	306.947	0.73343	1.66259	0.166785	4.39745	1.09528e-05	0.000316658	Jak3		ENSMUSG00000094724	414.487	-0.482703	0.715636	0.14976	-3.22317	0.00126781	0.0123939	Rnaset2b
ENSMUSG00000034422	927.41	0.734381	1.66368	0.1834	4.00425	6.22147e-05	0.00128139	Parp14		ENSMUSG00000028756	6541.32	-0.48252	0.715726	0.132111	-3.65239	0.000259811	0.00379082	Pink1
ENSMUSG00000026640	275.234	0.736173	1.66575	0.194956	3.77609	0.000159309	0.00263467	Plxna2		ENSMUSG00000029650	660.126	-0.482296	0.715837	0.1312	-3.67604	0.000236878	0.00357654	Slc46a3
ENSMUSG00000033991	457.14	0.737961	1.66782	0.139272	5.29871	1.16622e-07	8.05622e-06	Ttc37		ENSMUSG00000056629	1743.11	-0.482189	0.715891	0.106087	-4.54523	5.49e-06	0.000186246	Fkbp2
ENSMUSG00000005481	417.569	0.742359	1.67291	0.195072	3.80556	0.000141486	0.00241672	Ddx39		ENSMUSG00000025825	5500.91	-0.481084	0.716439	0.118829	-4.04854	5.15e-05	0.0011129	Iscu
ENSMUSG00000036553	1039.91	0.742667	1.67327	0.18639	3.98447	6.7631e-05	0.00137481	Sh3tc1		ENSMUSG00000025025	773.4	-0.481046	0.716458	0.14087	-3.41482	0.000638236	0.00740829	Mxi1
ENSMUSG00000044827	88.319	0.743314	1.67402	0.256993	2.89235	0.00382373	0.0284743	Tlr1		ENSMUSG00000020785	429.064	-0.480976	0.716493	0.180834	-2.65976	0.00781958	0.04765	Camkk1
ENSMUSG00000017144	1500.01	0.743408	1.67413	0.179867	4.1331	3.5791e-05	0.000847904	Rnd3		ENSMUSG00000025381	2553.86	-0.480578	0.716691	0.0983944	-4.8842	1.04e-06	4.87e-05	Cnpy2
ENSMUSG00000096910	87.0699	0.745754	1.67685	0.269511	2.76706	0.00565635	0.0377128	Zfp955b		ENSMUSG00000032418	48785.5	-0.480572	0.716693	0.128683	-3.73453	0.000188066	0.00298647	Me1
ENSMUSG00000038039	223.799	0.749301	1.68098	0.169969	4.40847	1.04104e-05	0.000303789	Gcc2		ENSMUSG00000028062	1598.74	-0.48002	0.716967	0.128903	-3.7239	0.000196171	0.00308732	Lamtor2
ENSMUSG00000027940	2783.37	0.749997	1.68179	0.115729	6.48061	9.13514e-11	2.16088e-08	Tpm3		ENSMUSG00000028743	925.308	-0.478588	0.71768	0.123473	-3.87605	0.000106167	0.00192588	Akr7a5
ENSMUSG00000027397	341.803	0.750031	1.68183	0.155757	4.81539	1.46913e-06	6.47521e-05	Slc20a1		ENSMUSG00000020432	3087.22	-0.478394	0.717776	0.124809	-3.83301	0.000126585	0.00221552	Tcn2
ENSMUSG00000030681	2770.58	0.750169	1.68199	0.137199	5.46773	4.5583e-08	3.82603e-06	Mvp		ENSMUSG00000023092	979.893	-0.478348	0.717799	0.173646	-2.75472	0.00587418	0.0386189	Fhl1
ENSMUSG00000027200	396.97	0.752908	1.68519	0.218448	3.44662	0.000567647	0.00680476	Sema6d		ENSMUSG00000047459	4331.25	-0.477826	0.718059	0.0897377	-5.32469	1.01e-07	7.24e-06	Dynlrb1
ENSMUSG00000070730	1653.98	0.757085	1.69007	0.161396	4.69085	2.72067e-06	0.000107805	Rmdn3		ENSMUSG00000039763	463.742	-0.477727	0.718108	0.133887	-3.56813	0.000359532	0.00478517	Dnajc28
ENSMUSG00000021365	549.431	0.75987	1.69334	0.164843	4.60967	4.03312e-06	0.000147115	Nedd9		ENSMUSG00000028884	351.171	-0.477008	0.718466	0.163923	-2.90995	0.00361492	0.0272909	Rpa2
ENSMUSG00000003746	897.804	0.761064	1.69474	0.146673	5.18884	2.11613e-07	1.35955e-05	Man1a		ENSMUSG00000009076	781.733	-0.47495	0.719492	0.119562	-3.97241	7.12e-05	0.00142683	Zmat5
ENSMUSG00000038884	395.373	0.761346	1.69507	0.210039	3.62479	0.000289193	0.00407849	A230050P20Rik		ENSMUSG00000030207	1365.42	-0.474629	0.719652	0.11602	-4.09092	4.3e-05	0.000972145	Fam234b
ENSMUSG00000044716	201.792	0.763558	1.69767	0.22853	3.34117	0.000834276	0.00899497	Dok7		ENSMUSG00000028461	1549.83	-0.47422	0.719856	0.131265	-3.6127	0.000303023	0.00423527	Ccdc107
ENSMUSG00000029771	204.841	0.7643	1.69855	0.208049	3.67366	0.000239103	0.00359276	Irf5		ENSMUSG00000034285	893.655	-0.474178	0.719877	0.138978	-3.41189	0.000645141	0.00748287	Nipsnap1
ENSMUSG00000056220	231.104	0.770094	1.70538	0.21394	3.59958	0.00031873	0.00440355	Pla2g4a		ENSMUSG00000021417	2143.13	-0.47376	0.720085	0.112004	-4.22984	2.34e-05	0.000595585	Eci2
ENSMUSG00000038388	405.015	0.770111	1.7054	0.14053	5.48003	4.25243e-08	3.58859e-06	Mpp6		ENSMUSG00000019718	616.012	-0.473343	0.720293	0.128129	-3.69426	0.000220525	0.00338145	L3hypdh
ENSMUSG00000015134	92.257	0.772185	1.70785	0.291581	2.64827	0.00809056	0.048806	Aldh1a3		ENSMUSG00000056737	1327.89	-0.472572	0.720678	0.137413	-3.43905	0.00058375	0.00694627	Capg
ENSMUSG00000030609	686.284	0.772295	1.70798	0.131712	5.86351	4.53172e-09	5.75196e-07	Aen		ENSMUSG00000020848	1304.73	-0.472128	0.7209	0.150206	-3.1432	0.0016711	0.0154557	Doc2b
ENSMUSG00000078862	143.683	0.772652	1.70841	0.226951	3.40449	0.000662868	0.00762055	Gm14326		ENSMUSG00000021213	470.255	-0.4721	0.720915	0.13425	-3.51656	0.000437179	0.00556254	Akr1c13
ENSMUSG00000054520	424.982	0.773409	1.7093	0.221988	3.48401	0.000493967	0.00611039	Sh3bp2		ENSMUSG00000030083	527.962	-0.471986	0.720971	0.123905	-3.80926	0.000139384	0.00239128	Abtb1
ENSMUSG00000035517	1434.35	0.775926	1.71229	0.163559	4.74403	2.09511e-06	8.76913e-05	Tdrd7		ENSMUSG00000041789	204.279	-0.471302	0.721313	0.171474	-2.74853	0.00598628	0.0391364	2700046A07Rik
ENSMUSG00000060429	310.145	0.777758	1.71446	0.18986	4.09647	4.19495e-05	0.000956081	Sntb1		ENSMUSG00000031161	464.232	-0.471227	0.721351	0.136616	-3.44928	0.000562082	0.00676057	Hdac6
ENSMUSG00000052812	155.828	0.778519	1.71537	0.193533	4.02267	5.75413e-05	0.0012042	Atad2b		ENSMUSG00000022433	1775.65	-0.471023	0.721453	0.127911	-3.68242	0.00023103	0.00351809	Csnk1e
ENSMUSG00000023905	3577.91	0.780529	1.71776	0.152539	5.11691	3.1058e-07	1.85777e-05	Tnfrsf12a		ENSMUSG00000027130	654.873	-0.469445	0.722242	0.12375	-3.7935	0.000148536	0.00251513	Slc12a6
ENSMUSG00000023959	850.346	0.781451	1.71886	0.231026	3.38252	0.000718231	0.00806693	Clic5		ENSMUSG00000021811	888.362	-0.468315	0.722808	0.114684	-4.08353	4.44e-05	0.000993526	Dnajc9
ENSMUSG00000025007	732.34	0.783953	1.72184	0.204809	3.82772	0.000129337	0.00225107	Aldh18a1		ENSMUSG00000029122	495.816	-0.468163	0.722884	0.150975	-3.10094	0.00192905	0.017243	Evc
ENSMUSG00000022587	12310.7	0.786792	1.72523	0.185938	4.23148	2.32161e-05	0.000592239	Ly6e		ENSMUSG00000038236	588.322	-0.467316	0.723309	0.13657	-3.42181	0.000622049	0.00729087	Hoxa7
ENSMUSG00000054958	182.505	0.794671	1.73468	0.220239	3.60823	0.000308295	0.00428593	Nt5c1a		ENSMUSG00000041046	467.313	-0.467172	0.723381	0.173105	-2.69878	0.00695947	0.0439172	Ramp3
ENSMUSG00000029640	655.83	0.795023	1.7351	0.118578	6.70463	2.01915e-11	6.77438e-09	Usp12		ENSMUSG00000041881	2711.54	-0.466494	0.723721	0.108433	-4.30215	1.69e-05	0.000460066	Ndufa7
ENSMUSG00000024298	202.292	0.795886	1.73614	0.273535	2.90963	0.00361851	0.0272909	Zfp871		ENSMUSG00000032657	231.987	-0.466051	0.723943	0.175791	-2.65116	0.00802157	0.0484834	Fam189b
ENSMUSG00000049562	95.1837	0.796688	1.73711	0.27838	2.86188	0.00421142	0.0304674	Ap5b1		ENSMUSG00000028104	500.516	-0.465392	0.724274	0.132966	-3.50009	0.0004651	0.00582757	Polr3gl
ENSMUSG00000026656	147.246	0.797901	1.73857	0.289909	2.75225	0.00591878	0.0388252	Fcgr2b		ENSMUSG00000036073	612.402	-0.465138	0.724402	0.13691	-3.3974	0.000680301	0.00776378	Galt
ENSMUSG00000035376	761.146	0.799281	1.74023	0.155155	5.15151	2.58399e-07	1.59554e-05	Hacd2		ENSMUSG00000020111	2109.67	-0.465007	0.724467	0.124265	-3.74208	0.000182507	0.00292872	Micu1
ENSMUSG00000031904	393.736	0.802773	1.74445	0.197009	4.0748	4.60538e-05	0.0010217	Slc7a6		ENSMUSG00000035585	1396.05	-0.465002	0.72447	0.0917902	-5.06593	4.06e-07	2.34e-05	Tsen34
ENSMUSG00000020476	1954.13	0.803057	1.74479	0.147906	5.4295	5.65107e-08	4.54766e-06	Dbnl		ENSMUSG00000006356	583.605	-0.464793	0.724575	0.114856	-4.04677	5.19e-05	0.0011198	Crip2
ENSMUSG00000021408	364.421	0.803661	1.74552	0.153477	5.23637	1.63762e-07	1.08333e-05	Ripk1		ENSMUSG00000054894	319.035	-0.464272	0.724837	0.151191	-3.07076	0.00213516	0.0186224	Atp5s
ENSMUSG00000041548	2152.33	0.803766	1.74565	0.158173	5.08155	3.7436e-07	2.18079e-05	Hspb8		ENSMUSG00000015405	340.209	-0.463988	0.724979	0.1582	-2.93292	0.00335793	0.0258756	Ace2
ENSMUSG00000020312	95.5146	0.803994	1.74593	0.257274	3.12505	0.00177775	0.0162116	Shc2		ENSMUSG00000034858	1686.25	-0.463952	0.724998	0.129124	-3.59308	0.000326793	0.00449902	Fam214a
ENSMUSG00000068246	264.046	0.804181	1.74615	0.276265	2.91091	0.00360381	0.0272591	Apol9b		ENSMUSG00000036278	392.218	-0.463813	0.725067	0.153687	-3.01791	0.00254521	0.0210353	Macrod1
ENSMUSG00000006435	135.958	0.805645	1.74793	0.284556	2.83124	0.00463683	0.0326524	Neurl1a		ENSMUSG00000036620	4486.12	-0.463534	0.725208	0.0996665	-4.65085	3.31e-06	0.000125571	Mgat4b
ENSMUSG00000016206	272.563	0.806093	1.74847	0.221956	3.63176	0.000281492	0.00402072	H2-M3		ENSMUSG00000032733	722.11	-0.463068	0.725442	0.129855	-3.56605	0.000362402	0.00481517	Snx33
ENSMUSG00000034684	671.599	0.806132	1.74852	0.1438	5.60594	2.07129e-08	1.95982e-06	Sema3f		ENSMUSG00000019996	429.211	-0.463007	0.725473	0.166972	-2.77297	0.00555478	0.0372839	Map7
ENSMUSG00000108218	107.228	0.808742	1.75168	0.258785	3.12515	0.00177715	0.0162116	NA		ENSMUSG00000017493	941.479	-0.461737	0.726111	0.163589	-2.82254	0.00476443	0.0332657	Igfbp4
ENSMUSG00000024087	1349.79	0.813615	1.75761	0.163835	4.96605	6.83287e-07	3.53228e-05	Cyp1b1		ENSMUSG00000035048	1666.2	-0.46101	0.726478	0.137055	-3.36368	0.000769108	0.00847375	Anapc13
ENSMUSG00000039934	84.192	0.816208	1.76077	0.279366	2.92165	0.00348186	0.0265813	Gsap		ENSMUSG00000025135	1071.62	-0.460832	0.726567	0.114979	-4.00795	6.12e-05	0.00126541	Anapc11
ENSMUSG00000050192	146.27	0.816717	1.76139	0.200328	4.0769	4.56411e-05	0.00101793	Eif5a2		ENSMUSG00000067288	3399.09	-0.460048	0.726962	0.0871131	-5.28104	1.28e-07	8.76e-06	Rps28
ENSMUSG00000003617	1458.07	0.817608	1.76248	0.148225	5.516	3.46805e-08	3.02476e-06	Cp		ENSMUSG00000031556	2347.52	-0.459886	0.727044	0.125865	-3.6538	0.000258384	0.00378769	Tm2d2
ENSMUSG00000027405	897.764	0.820221	1.76568	0.15165	5.40866	6.34994e-08	4.9321e-06	Nop56		ENSMUSG00000031534	538.561	-0.458886	0.727548	0.125896	-3.64497	0.000267424	0.00386576	Smim19
ENSMUSG00000038244	277.296	0.821299	1.767	0.264974	3.09954	0.00193818	0.0172908	Mical2		ENSMUSG00000022174	5116.38	-0.458824	0.727579	0.101294	-4.52962	5.91e-06	0.000197536	Dad1
ENSMUSG00000022241	1223.93	0.821755	1.76755	0.176993	4.64288	3.43592e-06	0.0001297	Tars		ENSMUSG00000021033	1090.43	-0.456655	0.728674	0.125827	-3.62922	0.000284279	0.00404337	Gstz1
ENSMUSG00000044042	80.3433	0.823258	1.7694	0.283558	2.90332	0.00369232	0.0277004	Fmn1		ENSMUSG00000000690	933.011	-0.456466	0.728769	0.162569	-2.80782	0.00498777	0.0343641	Hoxb6
ENSMUSG00000002111	244.335	0.823556	1.76976	0.267128	3.083	0.00204923	0.0180466	Spi1		ENSMUSG00000030062	8875.43	-0.455851	0.72908	0.0903784	-5.04381	4.56e-07	2.57e-05	Rpn1
ENSMUSG00000040033	1526.2	0.825568	1.77223	0.218662	3.77555	0.000159658	0.00263765	Stat2		ENSMUSG00000097415	432.466	-0.453667	0.730185	0.14943	-3.03597	0.00239762	0.0201679	NA
ENSMUSG00000102869	102.09	0.826159	1.77296	0.242956	3.40044	0.00067277	0.00771166	2900097C17Rik		ENSMUSG00000024975	2038.84	-0.453476	0.730281	0.109174	-4.15371	3.27e-05	0.000788152	Pdcd4
ENSMUSG00000002799	87.3868	0.826655	1.77357	0.260822	3.16942	0.00152743	0.0144261	Jag2		ENSMUSG00000022671	267.533	-0.453365	0.730337	0.164603	-2.75429	0.00588202	0.038649	Mzt2
ENSMUSG00000020061	143.62	0.828558	1.77591	0.302598	2.73815	0.00617858	0.0401248	Mybpc1		ENSMUSG00000006931	1396.89	-0.452981	0.730532	0.101028	-4.48372	7.34e-06	0.000233055	P3h4
ENSMUSG00000022148	211.583	0.83111	1.77905	0.203917	4.07573	4.58699e-05	0.00102157	Fyb		ENSMUSG00000053329	3711.97	-0.452445	0.730803	0.11411	-3.96501	7.34e-05	0.00146152	D10Jhu81e
ENSMUSG00000024743	224.728	0.831166	1.77912	0.289037	2.87564	0.00403214	0.0295123	Syt7		ENSMUSG00000020427	4988.74	-0.45238	0.730836	0.123971	-3.64907	0.000263188	0.00382935	Igfbp3
ENSMUSG00000032135	737.088	0.834411	1.78313	0.182023	4.58409	4.5596e-06	0.000162151	Mcam		ENSMUSG00000004945	2234.59	-0.451756	0.731153	0.111221	-4.06179	4.87e-05	0.00106931	Tmem242
ENSMUSG00000019960	1966.75	0.84042	1.79057	0.17812	4.71827	2.37859e-06	9.6581e-05	Dusp6		ENSMUSG00000028601	424.413	-0.451734	0.731163	0.156365	-2.88897	0.00386503	0.0286655	Echdc2
ENSMUSG00000037999	133.072	0.841057	1.79136	0.242293	3.47124	0.000518068	0.00631388	Arap2		ENSMUSG00000070394	1191.56	-0.451473	0.731296	0.149866	-3.01252	0.00259087	0.0212441	Tmem256
ENSMUSG00000031530	121.36	0.843163	1.79398	0.240331	3.50835	0.000450898	0.00570801	Dusp4		ENSMUSG00000029401	642.863	-0.451274	0.731397	0.122567	-3.68187	0.00023153	0.00351961	Rilpl2
ENSMUSG00000063972	176.637	0.845655	1.79708	0.22806	3.70804	0.000208868	0.00324139	Nr6a1		ENSMUSG00000068299	1126.05	-0.45106	0.731505	0.112616	-4.00531	6.19e-05	0.00127733	Nat8f4
ENSMUSG00000024851	383.463	0.846719	1.79841	0.147115	5.75549	8.63895e-09	9.70297e-07	Pitpnm1		ENSMUSG00000061119	506.505	-0.450693	0.731691	0.139933	-3.22079	0.0012784	0.0124807	Prcp
ENSMUSG00000069792	162.017	0.851641	1.80455	0.293918	2.89754	0.00376099	0.02811	Wfdc17		ENSMUSG00000029287	6924.56	-0.450492	0.731793	0.126391	-3.56427	0.000364873	0.00483976	Tgfbr3
ENSMUSG00000022887	103.19	0.852867	1.80609	0.287366	2.96788	0.00299865	0.0236626	Masp1		ENSMUSG00000031292	637.739	-0.450401	0.731839	0.146456	-3.07532	0.00210274	0.018422	Cdkl5
ENSMUSG00000041515	526.272	0.853851	1.80732	0.218017	3.91644	8.98663e-05	0.00171097	Irf8		ENSMUSG00000014602	845.029	-0.450021	0.732032	0.160071	-2.81137	0.00493307	0.0340925	Kif1a
ENSMUSG00000021322	83.9843	0.854057	1.80758	0.28345	3.01308	0.00258614	0.0212305	Aoah		ENSMUSG00000007891	7618.09	-0.450007	0.732039	0.101459	-4.43534	9.19e-06	0.000275765	Ctsd
ENSMUSG00000031093	115.954	0.854568	1.80822	0.311609	2.74244	0.00609844	0.0397034	Dock11		ENSMUSG00000035674	1744.95	-0.449582	0.732255	0.104771	-4.29108	1.78e-05	0.000477079	Ndufa3
ENSMUSG00000005506	230.846	0.855962	1.80997	0.204825	4.179	2.92793e-05	0.000719306	Celf1		ENSMUSG00000026473	13205.7	-0.449325	0.732386	0.114356	-3.92919	8.52e-05	0.00164076	Glul
ENSMUSG00000030000	61.3938	0.858996	1.81378	0.30265	2.83825	0.00453612	0.0321754	Add2		ENSMUSG00000040370	1438.64	-0.449239	0.732429	0.12211	-3.67899	0.000234163	0.00354927	Etfrf1
ENSMUSG00000090272	453.364	0.859045	1.81384	0.22223	3.86556	0.000110833	0.00199117	Mndal		ENSMUSG00000042613	2896.64	-0.448937	0.732582	0.100728	-4.45693	8.31e-06	0.000256519	Pbxip1
ENSMUSG00000060950	355.71	0.859526	1.81444	0.159027	5.40491	6.48393e-08	5.01124e-06	Trmt61a		ENSMUSG00000037221	500.263	-0.448454	0.732828	0.128798	-3.48183	0.000497996	0.00613463	Mospd3
ENSMUSG00000032577	835.592	0.860332	1.81546	0.153524	5.60389	2.09593e-08	1.97119e-06	Mapkapk3		ENSMUSG00000011148	748.6	-0.448422	0.732844	0.132751	-3.37793	0.000730328	0.00818141	Adssl1
ENSMUSG00000033220	173.269	0.860766	1.816	0.250319	3.43867	0.000584569	0.00695072	Rac2		ENSMUSG00000050188	329.898	-0.447921	0.733099	0.139688	-3.20659	0.00134318	0.0129687	Lsm10
ENSMUSG00000038213	380.671	0.867269	1.82421	0.22263	3.89557	9.79674e-05	0.00182514	Tapbpl		ENSMUSG00000024197	2090.25	-0.447646	0.733238	0.0893588	-5.00954	5.46e-07	2.91e-05	Plin3
ENSMUSG00000035049	272.952	0.871695	1.82981	0.181039	4.81495	1.47239e-06	6.47521e-05	Rrp12		ENSMUSG00000009549	3648.68	-0.446778	0.733679	0.103459	-4.31841	1.57e-05	0.000432729	Srp14
ENSMUSG00000019832	150.912	0.872594	1.83095	0.280633	3.10938	0.00187482	0.0168799	Rab32		ENSMUSG00000015013	725.5	-0.446343	0.733901	0.12747	-3.50156	0.000462545	0.00580953	Trappc2l
ENSMUSG00000092274	5795.93	0.873904	1.83262	0.318657	2.74246	0.00609814	0.0397034	Neat1		ENSMUSG00000030287	1095.9	-0.446059	0.734046	0.123591	-3.60916	0.000307188	0.00427435	Itpr2
ENSMUSG00000026749	747.745	0.877906	1.83771	0.223381	3.93009	8.49139e-05	0.00163738	Nek6		ENSMUSG00000032411	3658.26	-0.445203	0.734481	0.150158	-2.96489	0.00302789	0.0238504	Tfdp2
ENSMUSG00000059089	263.227	0.879646	1.83992	0.235379	3.73715	0.000186115	0.00296795	Fcgr4		ENSMUSG00000078350	1037.53	-0.444825	0.734674	0.121521	-3.66047	0.000251757	0.00371833	Smim1
ENSMUSG00000073490	216.095	0.881231	1.84195	0.292905	3.00859	0.00262464	0.0213973	Ifi207		ENSMUSG00000032038	1104.65	-0.444693	0.734741	0.124434	-3.57372	0.00035195	0.00472049	St3gal4
ENSMUSG00000001750	1059.55	0.882666	1.84378	0.182819	4.82809	1.37849e-06	6.1139e-05	Tcirg1		ENSMUSG00000015944	552.681	-0.444255	0.734964	0.124267	-3.575	0.000350223	0.0047054	Gatsl2
ENSMUSG00000035004	103.119	0.88599	1.84803	0.275588	3.21491	0.00130487	0.0127084	Igsf6		ENSMUSG00000024621	661.274	-0.443753	0.735219	0.125333	-3.5406	0.000399216	0.00519021	Csf1r
ENSMUSG00000084965	224.098	0.887651	1.85016	0.278614	3.18595	0.0014428	0.0138021	NA		ENSMUSG00000067847	1574.87	-0.443555	0.73532	0.12895	-3.43974	0.000582281	0.00693936	Romo1
ENSMUSG00000021701	720.189	0.889829	1.85296	0.198791	4.4762	7.59849e-06	0.000239652	Plk2		ENSMUSG00000045594	785.593	-0.443029	0.735589	0.123387	-3.59055	0.000329976	0.00453086	Glb1
ENSMUSG00000046223	209.677	0.890335	1.85361	0.196741	4.52542	6.0277e-06	0.000199962	Plaur		ENSMUSG00000003363	2024.41	-0.442818	0.735696	0.0936932	-4.72625	2.29e-06	9.4e-05	Pld3
ENSMUSG00000073016	73.1365	0.89044	1.85374	0.315575	2.82164	0.00477788	0.0333189	Uprt		ENSMUSG00000030541	3891.95	-0.442611	0.735802	0.129132	-3.42758	0.000608994	0.00716475	Idh2
ENSMUSG00000037580	2144.06	0.890771	1.85417	0.195563	4.5549	5.24104e-06	0.000180625	Gch1		ENSMUSG00000017176	1418.19	-0.441475	0.736382	0.113127	-3.90248	9.52e-05	0.00178657	Nt5c3b
ENSMUSG00000037405	381.907	0.891855	1.85556	0.314435	2.83637	0.00456291	0.0322772	Icam1		ENSMUSG00000039607	729.497	-0.441162	0.736541	0.153996	-2.86477	0.00417316	0.0302467	Rbms3
ENSMUSG00000011179	8141.92	0.895551	1.86032	0.166692	5.37249	7.76573e-08	5.7459e-06	Odc1		ENSMUSG00000063558	631.179	-0.440854	0.736699	0.165219	-2.66829	0.0076238	0.0468963	Aox1
ENSMUSG00000041936	1003.97	0.904131	1.87142	0.15051	6.0071	1.88866e-09	2.86269e-07	Agrn		ENSMUSG00000073988	328.998	-0.440091	0.737088	0.164593	-2.67381	0.00749943	0.0463321	Ttpa
ENSMUSG00000027962	913.903	0.906432	1.8744	0.2379	3.81013	0.000138891	0.00238545	Vcam1		ENSMUSG00000047635	348.17	-0.439774	0.73725	0.142171	-3.09327	0.00197966	0.0175805	2810006K23Rik
ENSMUSG00000024327	117.322	0.906741	1.87481	0.242313	3.74203	0.000182541	0.00292872	Slc39a7		ENSMUSG00000025232	2736.22	-0.438162	0.738074	0.107166	-4.08862	4.34e-05	0.000979031	Hexa
ENSMUSG00000040296	1961.59	0.907504	1.8758	0.198594	4.56964	4.88569e-06	0.000170638	Ddx58		ENSMUSG00000046330	4321.15	-0.437764	0.738278	0.098411	-4.44833	8.65e-06	0.000264399	Rpl37a
ENSMUSG00000054150	147.311	0.910949	1.88028	0.254	3.58642	0.000335253	0.00457478	Syne3		ENSMUSG00000054364	7485.66	-0.437723	0.738299	0.153197	-2.85725	0.00427335	0.0307303	Rhob
ENSMUSG00000078153	133.167	0.911147	1.88054	0.25584	3.56139	0.000368895	0.00488481	Psme2b		ENSMUSG00000071657	1196.52	-0.437415	0.738457	0.107731	-4.06025	4.9e-05	0.00107336	Bscl2
ENSMUSG00000099032	264.027	0.913687	1.88385	0.242154	3.77316	0.00016119	0.00265454	Tcf24		ENSMUSG00000090258	659.612	-0.437266	0.738533	0.124137	-3.52245	0.000427581	0.00547163	Churc1
ENSMUSG00000025887	4193.22	0.915961	1.88683	0.101316	9.04059	1.55825e-19	1.21637e-15	Casp12		ENSMUSG00000030122	7934.43	-0.437249	0.738542	0.093952	-4.65396	3.26e-06	0.000124382	Ptms
ENSMUSG00000029405	8924.95	0.922896	1.89592	0.145019	6.36397	1.96602e-10	4.14778e-08	G3bp2		ENSMUSG00000044629	372.983	-0.436509	0.73892	0.133172	-3.27779	0.00104624	0.0107108	Cnrip1
ENSMUSG00000024079	1937.6	0.92293	1.89596	0.199708	4.62139	3.81174e-06	0.000139365	Eif2ak2		ENSMUSG00000031216	928.877	-0.436091	0.739134	0.14945	-2.91798	0.00352311	0.0267855	Stard8
ENSMUSG00000034218	260.493	0.927012	1.90133	0.175359	5.28636	1.24776e-07	8.54385e-06	Atm		ENSMUSG00000027203	664.891	-0.435742	0.739313	0.115748	-3.76458	0.00016683	0.00272727	Dut
ENSMUSG00000021457	143.004	0.932695	1.90884	0.339376	2.74826	0.00599124	0.0391524	Syk		ENSMUSG00000022761	1338.11	-0.435657	0.739357	0.126587	-3.44156	0.000578368	0.00691914	Lztr1
ENSMUSG00000024339	2040.41	0.933127	1.90941	0.188053	4.96205	6.97544e-07	3.58226e-05	Tap2		ENSMUSG00000058756	1139.52	-0.435227	0.739577	0.0977458	-4.45264	8.48e-06	0.000260157	Thra
ENSMUSG00000054453	101.173	0.944434	1.92443	0.273091	3.45832	0.000543558	0.00656397	Sytl5		ENSMUSG00000053898	6850.77	-0.435137	0.739624	0.0982571	-4.42856	9.49e-06	0.000281568	Ech1
ENSMUSG00000035356	174.339	0.946519	1.92722	0.251896	3.75758	0.000171565	0.00278139	Nfkbiz		ENSMUSG00000001794	11367.7	-0.435125	0.73963	0.096155	-4.52524	6.03e-06	0.000199962	Capns1
ENSMUSG00000034947	446.302	0.951311	1.93363	0.235594	4.03793	5.39245e-05	0.00115009	Tmem106a		ENSMUSG00000031371	631.412	-0.435064	0.739661	0.123374	-3.52638	0.000421281	0.00540483	Haus7
ENSMUSG00000020592	243.23	0.952006	1.93456	0.230208	4.13542	3.54305e-05	0.000841918	Sdc1		ENSMUSG00000028152	2477.63	-0.435	0.739694	0.0833913	-5.21637	1.82e-07	1.19e-05	Tspan5
ENSMUSG00000020572	2612.03	0.953519	1.93659	0.138262	6.89645	5.33199e-12	2.31231e-09	Nampt		ENSMUSG00000031521	747.41	-0.434779	0.739807	0.127153	-3.41933	0.000627745	0.0073356	Aga
ENSMUSG00000033792	293.84	0.95398	1.93721	0.159073	5.99711	2.0086e-09	2.98651e-07	Atp7a		ENSMUSG00000032679	4141.56	-0.434651	0.739873	0.149518	-2.90702	0.00364889	0.0274537	Cd59a
ENSMUSG00000025986	1065.96	0.956247	1.94026	0.170173	5.61925	1.91789e-08	1.82574e-06	Slc39a10		ENSMUSG00000001143	918.793	-0.434544	0.739928	0.122151	-3.55743	0.000374496	0.0049214	Lman2l
ENSMUSG00000038774	964.838	0.960059	1.94539	0.160154	5.9946	2.03981e-09	3.0043e-07	Ascc3		ENSMUSG00000086316	875.339	-0.434401	0.740001	0.108564	-4.00133	6.3e-05	0.00129561	Nbdy
ENSMUSG00000005672	114.677	0.960168	1.94554	0.297141	3.23135	0.00123207	0.012147	Kit		ENSMUSG00000031714	371.929	-0.433602	0.740411	0.160808	-2.69639	0.00700955	0.0441797	Gab1
ENSMUSG00000080316	201.371	0.965297	1.95247	0.21196	4.55416	5.25958e-06	0.000180865	Spaca6		ENSMUSG00000036309	13517.5	-0.432307	0.741076	0.0974179	-4.43766	9.09e-06	0.000274431	Skp1a
ENSMUSG00000059456	120.825	0.966495	1.95409	0.229278	4.21538	2.49356e-05	0.000626884	Ptk2b		ENSMUSG00000021127	4147.05	-0.432271	0.741094	0.114529	-3.77434	0.000160433	0.00264662	Zfp36l1
ENSMUSG00000031497	94.3856	0.971032	1.96024	0.282711	3.43471	0.000593183	0.00703706	Tnfsf13b		ENSMUSG00000034101	783.781	-0.432133	0.741165	0.11136	-3.8805	0.000104243	0.00190121	Ctnnd1
ENSMUSG00000027580	947.771	0.973266	1.96328	0.156072	6.23602	4.48847e-10	8.24399e-08	Helz2		ENSMUSG00000021094	2442.17	-0.431219	0.741635	0.13679	-3.15241	0.00161928	0.0150986	Dhrs7
ENSMUSG00000071713	57.9112	0.974813	1.96539	0.352408	2.76615	0.00567223	0.0377472	Csf2rb		ENSMUSG00000033610	921.291	-0.43111	0.741691	0.118029	-3.65257	0.000259626	0.00379082	Pank1
ENSMUSG00000027322	149.768	0.975371	1.96615	0.203434	4.79453	1.63055e-06	7.05156e-05	Siglec1		ENSMUSG00000032067	1164.02	-0.430768	0.741867	0.0948345	-4.54231	5.56e-06	0.000188021	Pts
ENSMUSG00000057346	224.933	0.976314	1.96743	0.323314	3.01971	0.00253016	0.0209543	Apol9a		ENSMUSG00000051007	790.745	-0.430678	0.741913	0.102739	-4.19194	2.77e-05	0.000684292	Gatd1
ENSMUSG00000031465	73.1552	0.978608	1.97056	0.326634	2.99604	0.00273511	0.0220674	Angpt2		ENSMUSG00000107881	2195.92	-0.429839	0.742344	0.128189	-3.35316	0.000798946	0.00871639	NA
ENSMUSG00000051000	61.1272	0.98335	1.97705	0.36987	2.65864	0.00784569	0.0477532	Fam160a1		ENSMUSG00000029030	4128	-0.429768	0.742381	0.109069	-3.94034	8.14e-05	0.00157802	Tprgl
ENSMUSG00000037816	357.852	0.996051	1.99453	0.213164	4.67271	2.97254e-06	0.000115903	Fbxw17		ENSMUSG00000054920	3521.65	-0.429234	0.742656	0.0869681	-4.93554	7.99e-07	3.99e-05	Klhl5
ENSMUSG00000056258	68.889	1.00083	2.00115	0.347513	2.87997	0.00397709	0.0292465	Kcnq3		ENSMUSG00000026179	444.798	-0.428821	0.742869	0.141189	-3.03721	0.0023878	0.0201223	Pnkd
ENSMUSG00000050147	89.0826	1.00665	2.00924	0.361587	2.78398	0.00536959	0.036243	F2rl3		ENSMUSG00000062908	9616.46	-0.428348	0.743112	0.109951	-3.89582	9.79e-05	0.00182514	Acadm
ENSMUSG00000006818	4829.35	1.00672	2.00933	0.168818	5.96331	2.47173e-09	3.54024e-07	Sod2		ENSMUSG00000045410	889.521	-0.42753	0.743534	0.129857	-3.29231	0.000993676	0.0103078	Akr1e1
ENSMUSG00000021871	797.301	1.00685	2.00952	0.200717	5.01626	5.26861e-07	2.84614e-05	Pnp		ENSMUSG00000021846	340.667	-0.427437	0.743582	0.155678	-2.74564	0.00603924	0.0394232	Peli2
ENSMUSG00000020437	77.9714	1.00976	2.01358	0.308276	3.27551	0.00105472	0.0107835	Myo1g		ENSMUSG00000003812	356.748	-0.427161	0.743724	0.154718	-2.7609	0.00576432	0.0381666	Dnase2a
ENSMUSG00000014813	96.4997	1.01129	2.01571	0.282277	3.58261	0.000340172	0.00461806	Stc1		ENSMUSG00000044197	919.862	-0.426718	0.743952	0.161106	-2.64867	0.00808089	0.0487665	Gpr146
ENSMUSG00000094441	139.648	1.01351	2.01882	0.236803	4.27997	1.86918e-05	0.000495444	Zfp955a		ENSMUSG00000039787	350.364	-0.426583	0.744022	0.143919	-2.96404	0.00303631	0.0239047	Cercam
ENSMUSG00000079197	4384.13	1.01554	2.02165	0.170738	5.94793	2.7155e-09	3.81932e-07	Psme2		ENSMUSG00000031818	11139.5	-0.426509	0.74406	0.102874	-4.14595	3.38e-05	0.000807821	Cox4i1
ENSMUSG00000028780	52.997	1.01954	2.02727	0.335558	3.03833	0.0023789	0.0201203	Sema3c		ENSMUSG00000042737	655.587	-0.426345	0.744145	0.14957	-2.85047	0.00436552	0.0312636	Dpm3
ENSMUSG00000005057	78.2223	1.02392	2.03344	0.279654	3.66139	0.000250849	0.00371209	Sh2b2		ENSMUSG00000021238	4347.5	-0.42599	0.744328	0.140855	-3.02432	0.00249197	0.020738	Aldh6a1
ENSMUSG00000054855	47.2557	1.02857	2.04	0.366672	2.80515	0.00502932	0.0345893	Rnd1		ENSMUSG00000098332	305.861	-0.425462	0.7446	0.150773	-2.82186	0.00477459	0.0333189	NA
ENSMUSG00000042901	1617.45	1.03006	2.04211	0.19769	5.2105	1.88333e-07	1.22002e-05	Aida		ENSMUSG00000031782	2209.23	-0.424908	0.744886	0.136051	-3.12315	0.00178925	0.0162595	Coq9
ENSMUSG00000004891	584.611	1.03083	2.04319	0.254056	4.05747	4.96065e-05	0.00108467	Nes		ENSMUSG00000052914	467.866	-0.424331	0.745184	0.153302	-2.76794	0.0056411	0.0376363	Cyp2j6
ENSMUSG00000025092	2143.3	1.03112	2.04361	0.19935	5.17241	2.31091e-07	1.45285e-05	Hspa12a		ENSMUSG00000025868	1952.08	-0.424052	0.745328	0.108758	-3.89905	9.66e-05	0.00180556	Higd2a
ENSMUSG00000079227	287.664	1.0317	2.04443	0.308054	3.34908	0.000810815	0.00880282	Ccr5		ENSMUSG00000022450	2830.82	-0.423882	0.745416	0.123788	-3.42425	0.000616491	0.00723659	Ndufa6
ENSMUSG00000018379	134.902	1.03402	2.04773	0.286408	3.61032	0.000305823	0.00426079	Srsf1		ENSMUSG00000021240	265.187	-0.423631	0.745546	0.152783	-2.77276	0.00555831	0.0372839	Abcd4
ENSMUSG00000024529	53.7162	1.03937	2.05533	0.352081	2.95208	0.00315642	0.0245627	Lox		ENSMUSG00000027706	10459.7	-0.423149	0.745795	0.103975	-4.06973	4.71e-05	0.00104082	Sec62
ENSMUSG00000097572	80.4233	1.04451	2.06267	0.291349	3.58508	0.00033698	0.00458669	NA		ENSMUSG00000073889	1063.34	-0.423096	0.745822	0.114811	-3.68516	0.000228562	0.00348808	Il11ra1
ENSMUSG00000108801	122.553	1.05012	2.07071	0.309895	3.38864	0.000702405	0.00794634	NA		ENSMUSG00000004561	233.191	-0.42287	0.745939	0.157562	-2.68383	0.00727848	0.0454163	Mettl17
ENSMUSG00000004709	35.3091	1.0529	2.0747	0.396228	2.65732	0.00787657	0.0479038	Cd244		ENSMUSG00000072694	264.054	-0.422676	0.74604	0.153257	-2.75796	0.00581636	0.0383954	1500011B03Rik
ENSMUSG00000034116	134.291	1.05295	2.07477	0.282569	3.72635	0.000194276	0.00306367	Vav1		ENSMUSG00000024425	9391.72	-0.422623	0.746067	0.0926791	-4.56006	5.11e-06	0.000177021	Ndfip1
ENSMUSG00000046711	115.039	1.05862	2.08294	0.320592	3.30208	0.000959697	0.0100421	Hmga1		ENSMUSG00000086567	1406.22	-0.42224	0.746265	0.12956	-3.25903	0.00111792	0.0112527	NA
ENSMUSG00000039519	73.5687	1.05895	2.08341	0.325907	3.24924	0.00115713	0.0115653	Cyp7b1		ENSMUSG00000064341	217268	-0.421756	0.746516	0.12381	-3.40648	0.000658058	0.00758759	ND1
ENSMUSG00000058126	32.6307	1.06858	2.09737	0.395718	2.70036	0.00692654	0.0437448	NA		ENSMUSG00000047888	1408.64	-0.421232	0.746787	0.141767	-2.97129	0.00296554	0.0235135	Tnrc6b
ENSMUSG00000026615	5450.29	1.07272	2.10339	0.166705	6.43482	1.23624e-10	2.83825e-08	Eprs		ENSMUSG00000034566	4066.45	-0.420789	0.747016	0.0903184	-4.65896	3.18e-06	0.000122211	Atp5h
ENSMUSG00000023249	1776.18	1.07308	2.10393	0.175206	6.12469	9.08627e-10	1.57616e-07	Parp3		ENSMUSG00000021707	426.838	-0.420651	0.747087	0.152994	-2.74946	0.00596943	0.039059	Dhfr
ENSMUSG00000037820	1194.58	1.07812	2.11129	0.233116	4.62484	3.74893e-06	0.000137714	Tgm2		ENSMUSG00000038690	4563.53	-0.420316	0.747261	0.0987559	-4.25611	2.08e-05	0.000539445	Atp5j2
ENSMUSG00000103651	79.1193	1.0797	2.1136	0.37002	2.91795	0.00352341	0.0267855	NA		ENSMUSG00000000876	856.314	-0.420032	0.747408	0.122763	-3.42148	0.000622819	0.00729306	Pxmp4
ENSMUSG00000020181	48.617	1.08987	2.12855	0.389211	2.8002	0.00510715	0.0349859	Nav3		ENSMUSG00000020253	2028.86	-0.420011	0.747419	0.112632	-3.72907	0.000192188	0.00303887	Ppm1m
ENSMUSG00000024978	1274.02	1.09015	2.12896	0.183586	5.93807	2.88403e-09	3.98456e-07	Gpam		ENSMUSG00000038302	560.042	-0.419383	0.747744	0.152318	-2.75334	0.00589914	0.0387452	Afg1l
ENSMUSG00000060519	1532.39	1.09167	2.13121	0.384322	2.84051	0.00450413	0.0320357	Tor3a		ENSMUSG00000030852	559.896	-0.419251	0.747813	0.138089	-3.0361	0.00239657	0.0201679	Tacc2
ENSMUSG00000023067	343.142	1.09659	2.13849	0.293813	3.73229	0.000189749	0.00300748	Cdkn1a		ENSMUSG00000021760	1996.6	-0.418904	0.747992	0.0914146	-4.58247	4.6e-06	0.000162678	Gpx8
ENSMUSG00000047735	788.959	1.09841	2.14118	0.199519	5.50527	3.68606e-08	3.17938e-06	Samd9l		ENSMUSG00000028469	697.408	-0.418831	0.748031	0.153293	-2.73223	0.00629065	0.0406665	Npr2
ENSMUSG00000042377	38.1452	1.10306	2.1481	0.391674	2.81627	0.00485851	0.0337265	Fam83g		ENSMUSG00000022969	6476.32	-0.417783	0.748574	0.105002	-3.9788	6.93e-05	0.0013989	Il10rb
ENSMUSG00000070031	107.008	1.10476	2.15063	0.364821	3.02823	0.00245991	0.020548	Sp140		ENSMUSG00000010607	701.779	-0.417405	0.74877	0.123098	-3.39083	0.000696824	0.00789465	Pigyl
ENSMUSG00000005802	42.2685	1.10568	2.152	0.369721	2.99057	0.00278461	0.0223628	Slc30a4		ENSMUSG00000015016	688.854	-0.417194	0.74888	0.142634	-2.92493	0.00344539	0.0263673	Acsf3
ENSMUSG00000053907	411.459	1.10704	2.15403	0.176767	6.2627	3.78372e-10	7.38393e-08	Mat2a		ENSMUSG00000029070	626.834	-0.417088	0.748935	0.134507	-3.10087	0.00192951	0.017243	Mxra8
ENSMUSG00000040528	100.51	1.10902	2.15699	0.352002	3.15059	0.00162939	0.0151338	Milr1		ENSMUSG00000033938	1582.55	-0.416989	0.748986	0.101559	-4.10589	4.03e-05	0.000928787	Ndufb7
ENSMUSG00000039239	70.0391	1.11287	2.16275	0.327414	3.39896	0.000676416	0.00773076	Tgfb2		ENSMUSG00000042842	1888.79	-0.416558	0.74921	0.120841	-3.44717	0.000566497	0.00680319	Serpinb6b
ENSMUSG00000023186	3162.81	1.1157	2.167	0.154127	7.23883	4.52559e-13	3.0719e-10	Vwa5a		ENSMUSG00000052139	1437.95	-0.416026	0.749487	0.141928	-2.93125	0.00337605	0.025992	Babam2
ENSMUSG00000039704	50.763	1.11583	2.1672	0.337944	3.30183	0.000960546	0.0100442	Lmbrd2		ENSMUSG00000073616	1891.16	-0.415919	0.749542	0.108461	-3.83473	0.000125703	0.00220255	Cops9
ENSMUSG00000024043	834.438	1.12146	2.17567	0.169202	6.62792	3.40444e-11	1.04216e-08	Arhgap28		ENSMUSG00000020715	4872.5	-0.415917	0.749543	0.12618	-3.29623	0.000979925	0.0102165	Ern1
ENSMUSG00000025017	492.651	1.12377	2.17916	0.189206	5.9394	2.86068e-09	3.98456e-07	Pik3ap1		ENSMUSG00000070780	1350.59	-0.414906	0.750069	0.0981316	-4.22805	2.36e-05	0.000598393	Rbm47
ENSMUSG00000041180	86.1164	1.12844	2.18622	0.27832	4.05447	5.0248e-05	0.00109258	Hectd2		ENSMUSG00000022453	774.774	-0.414868	0.750088	0.11595	-3.57798	0.00034626	0.00466018	Naga
ENSMUSG00000021583	1742.7	1.13281	2.19285	0.158574	7.14375	9.08192e-13	5.25137e-10	Erap1		ENSMUSG00000003031	902.597	-0.414774	0.750137	0.122139	-3.39592	0.000683983	0.00778873	Cdkn1b
ENSMUSG00000031304	92.8815	1.13751	2.20001	0.346703	3.28093	0.00103466	0.0106271	Il2rg		ENSMUSG00000025495	766.653	-0.414642	0.750206	0.106069	-3.90916	9.26e-05	0.00174965	Ptdss2
ENSMUSG00000035208	422.468	1.13865	2.20176	0.25408	4.48148	7.41287e-06	0.000234746	Slfn8		ENSMUSG00000026260	3038	-0.414558	0.750249	0.104725	-3.95854	7.54e-05	0.00149022	Ndufa10
ENSMUSG00000070327	3614.64	1.14006	2.20391	0.348253	3.27366	0.00106165	0.0108401	Rnf213		ENSMUSG00000032766	527.635	-0.41453	0.750264	0.118076	-3.51071	0.000446916	0.00566796	Gng11
ENSMUSG00000043832	134.859	1.14292	2.20828	0.335612	3.40548	0.000660469	0.00760416	Clec4a3		ENSMUSG00000032965	990.624	-0.414523	0.750268	0.115341	-3.59389	0.000325778	0.00448901	Ift57
ENSMUSG00000038807	94.0315	1.14479	2.21114	0.359479	3.18459	0.00144957	0.0138414	Rap1gap2		ENSMUSG00000028164	481.365	-0.413901	0.750591	0.13796	-3.00016	0.00269837	0.0218048	Manba
ENSMUSG00000051166	163.831	1.14672	2.2141	0.33434	3.42979	0.000604049	0.00712805	Eml5		ENSMUSG00000037960	638.897	-0.413546	0.750776	0.122866	-3.36583	0.000763128	0.00844232	Card19
ENSMUSG00000042743	223.22	1.15219	2.2225	0.259788	4.4351	9.20276e-06	0.000275765	Sgtb		ENSMUSG00000059772	296.955	-0.413529	0.750784	0.146864	-2.81572	0.00486678	0.0337689	Slx1b
ENSMUSG00000029304	119.149	1.15603	2.22843	0.317231	3.64413	0.000268296	0.00387479	Spp1		ENSMUSG00000031168	647.626	-0.413231	0.75094	0.115134	-3.58912	0.000331795	0.0045459	Ebp
ENSMUSG00000033355	1184.83	1.16679	2.24511	0.236466	4.93427	8.04504e-07	3.98728e-05	Rtp4		ENSMUSG00000001285	831.348	-0.413198	0.750957	0.12597	-3.28014	0.00103756	0.0106498	Myg1
ENSMUSG00000056145	33.4415	1.16819	2.24729	0.414588	2.81771	0.00483681	0.0336401	AI504432		ENSMUSG00000030934	4167.19	-0.413058	0.75103	0.11543	-3.57841	0.000345687	0.00465656	Oat
ENSMUSG00000020099	256.604	1.1697	2.24965	0.273607	4.27512	1.91036e-05	0.000504644	Unc5b		ENSMUSG00000049532	400.726	-0.412969	0.751076	0.154108	-2.67973	0.00736821	0.0458114	Sall2
ENSMUSG00000022602	64.6094	1.17186	2.25302	0.44057	2.65987	0.00781708	0.04765	Arc		ENSMUSG00000018593	41157.7	-0.412835	0.751146	0.099425	-4.15223	3.29e-05	0.000792043	Sparc
ENSMUSG00000022906	1158.69	1.17525	2.25833	0.240407	4.88859	1.01559e-06	4.7757e-05	Parp9		ENSMUSG00000051319	1304.82	-0.412293	0.751428	0.130612	-3.15664	0.00159599	0.0149452	1500011K16Rik
ENSMUSG00000024883	158.893	1.17553	2.25875	0.267531	4.39397	1.11297e-05	0.000321178	Rin1		ENSMUSG00000038692	483.942	-0.412175	0.751489	0.122024	-3.37781	0.000730646	0.00818141	Hoxb4
ENSMUSG00000030717	205.909	1.18151	2.26814	0.344276	3.43187	0.000599444	0.00708893	Nupr1		ENSMUSG00000024132	1912.38	-0.411712	0.751731	0.0937829	-4.39006	1.13e-05	0.000325815	Eci1
ENSMUSG00000042129	153.142	1.18277	2.27011	0.340215	3.47653	0.000507952	0.00622949	Rassf4		ENSMUSG00000030826	2681.19	-0.410964	0.752121	0.116998	-3.51258	0.000443783	0.0056328	Bcat2
ENSMUSG00000095123	137.79	1.18505	2.27372	0.271499	4.36484	1.27213e-05	0.000359141	NA		ENSMUSG00000036199	2497.67	-0.41093	0.752138	0.107933	-3.80728	0.000140506	0.0024026	Ndufa13
ENSMUSG00000021130	110.898	1.19213	2.2849	0.322275	3.69911	0.000216354	0.00333437	Galnt16		ENSMUSG00000015289	718.381	-0.410304	0.752465	0.12297	-3.33663	0.00084802	0.00911591	Lage3
ENSMUSG00000020464	2197.94	1.20011	2.29757	0.213033	5.63345	1.76635e-08	1.7225e-06	Pnpt1		ENSMUSG00000034892	4160.93	-0.41021	0.752514	0.101145	-4.05564	5e-05	0.00109168	Rps29
ENSMUSG00000034071	36.3247	1.20218	2.30087	0.415359	2.89431	0.00379993	0.0283307	Zfp551		ENSMUSG00000016252	3907.91	-0.410142	0.752549	0.134349	-3.0528	0.00226714	0.0194049	Atp5e
ENSMUSG00000040152	151.598	1.20413	2.30398	0.262314	4.5904	4.42392e-06	0.000157826	Thbs1		ENSMUSG00000033735	1250.02	-0.410099	0.752572	0.130904	-3.13283	0.00173129	0.0158435	Spr
ENSMUSG00000096727	810.26	1.20859	2.31112	0.206745	5.8458	5.04148e-09	6.15767e-07	Psmb9		ENSMUSG00000027935	591.725	-0.409853	0.7527	0.122274	-3.35191	0.000802569	0.00874369	Rab13
ENSMUSG00000049093	130.201	1.209	2.31177	0.316369	3.82147	0.000132656	0.00229858	Il23r		ENSMUSG00000036748	1177.82	-0.409668	0.752797	0.11414	-3.58918	0.000331717	0.0045459	Cuedc2
ENSMUSG00000026875	46.7636	1.21195	2.3165	0.418293	2.89736	0.00376313	0.02811	Traf1		ENSMUSG00000015837	17496.6	-0.409126	0.753079	0.0813471	-5.02939	4.92e-07	2.72e-05	Sqstm1
ENSMUSG00000075602	2541.33	1.21223	2.31695	0.367811	3.29579	0.000981446	0.0102195	Ly6a		ENSMUSG00000007867	396.983	-0.407577	0.753888	0.151558	-2.68925	0.00716131	0.0449006	Ift43
ENSMUSG00000053835	192.167	1.21377	2.31943	0.260818	4.65371	3.2601e-06	0.000124382	H2-T24		ENSMUSG00000024181	1209.71	-0.407342	0.754012	0.115764	-3.51873	0.000433612	0.00552616	Mrpl28
ENSMUSG00000020122	50.9778	1.21382	2.31951	0.408687	2.97005	0.00297749	0.0235713	Egfr		ENSMUSG00000040234	1816.14	-0.407222	0.754074	0.097971	-4.15656	3.23e-05	0.000780775	Tm7sf3
ENSMUSG00000072620	504.855	1.21459	2.32075	0.265329	4.57768	4.70172e-06	0.000164951	Slfn2		ENSMUSG00000029722	990.023	-0.407119	0.754128	0.109963	-3.70233	0.000213629	0.00330543	Agfg2
ENSMUSG00000026303	34.6133	1.221	2.33108	0.417411	2.92517	0.00344272	0.0263599	Mlph		ENSMUSG00000071654	912.834	-0.407034	0.754172	0.110497	-3.68365	0.000229917	0.00350534	Uqcc3
ENSMUSG00000044244	29.2584	1.22925	2.34446	0.453846	2.70852	0.00675833	0.0428936	Il20rb		ENSMUSG00000052684	10076.2	-0.406804	0.754292	0.140386	-2.89776	0.0037584	0.02811	Jun
ENSMUSG00000040522	28.8412	1.22988	2.34547	0.465669	2.64109	0.00826394	0.0495778	Tlr8		ENSMUSG00000019689	558.699	-0.406731	0.754331	0.146748	-2.77163	0.00557762	0.0373404	Fmc1
ENSMUSG00000104814	28.8498	1.23196	2.34886	0.458478	2.68706	0.00720839	0.0450959	NA		ENSMUSG00000028138	4453.85	-0.406106	0.754657	0.0864544	-4.69735	2.64e-06	0.000105507	Adh5
ENSMUSG00000027859	47.7602	1.23482	2.35352	0.393244	3.14008	0.00168903	0.0155505	Ngf		ENSMUSG00000018861	35252.4	-0.405333	0.755062	0.120965	-3.35084	0.00080568	0.00876534	Fdxr
ENSMUSG00000030830	148.776	1.23985	2.36174	0.258207	4.80177	1.5727e-06	6.85756e-05	Itgal		ENSMUSG00000011884	1019.19	-0.405084	0.755192	0.121389	-3.33708	0.000846627	0.00910926	Gltp
ENSMUSG00000058624	291.501	1.24104	2.3637	0.282958	4.38596	1.15474e-05	0.000330785	Gda		ENSMUSG00000031969	2014.16	-0.404313	0.755596	0.122431	-3.30238	0.000958679	0.0100382	Acad8
ENSMUSG00000024677	415.791	1.24409	2.3687	0.179068	6.94761	3.71533e-12	1.65725e-09	Ms4a6b		ENSMUSG00000026641	907.332	-0.404311	0.755597	0.110103	-3.67211	0.00024056	0.00360784	Usf1
ENSMUSG00000027894	80.9438	1.24969	2.3779	0.264029	4.73316	2.21049e-06	9.17825e-05	Slc6a17		ENSMUSG00000035781	1603.15	-0.403997	0.755761	0.105774	-3.81943	0.00013376	0.00231515	R3hdm4
ENSMUSG00000040483	1188.31	1.26043	2.39567	0.236442	5.33081	9.77773e-08	7.1e-06	Xaf1		ENSMUSG00000024158	1185.43	-0.403917	0.755803	0.134176	-3.01035	0.00260947	0.0213293	Hagh
ENSMUSG00000038301	551.094	1.26332	2.40047	0.172055	7.34251	2.09617e-13	1.78025e-10	Snx10		ENSMUSG00000050552	1427.97	-0.403708	0.755913	0.145796	-2.769	0.00562293	0.0375632	Lamtor4
ENSMUSG00000026946	864.467	1.27314	2.41687	0.253311	5.026	5.00821e-07	2.75311e-05	Nmi		ENSMUSG00000034868	2451.22	-0.403696	0.755919	0.0935433	-4.3156	1.59e-05	0.000435956	Myl12b
ENSMUSG00000024737	230.42	1.27474	2.41955	0.294991	4.32128	1.55128e-05	0.000429407	Slc15a3		ENSMUSG00000024963	379.703	-0.403401	0.756074	0.14953	-2.69779	0.00698009	0.0440118	Dnajc4
ENSMUSG00000037447	73.3898	1.28271	2.43296	0.38599	3.32317	0.000890001	0.00943933	Arid5a		ENSMUSG00000020163	2836.9	-0.402761	0.756409	0.12763	-3.15569	0.00160119	0.0149777	Uqcr11
ENSMUSG00000036564	106.486	1.28371	2.43465	0.478876	2.68068	0.00734731	0.0457651	Ndrg4		ENSMUSG00000028969	728.883	-0.402601	0.756493	0.143892	-2.79793	0.00514311	0.035109	Cdk5
ENSMUSG00000022575	332.824	1.29172	2.44819	0.255732	5.05106	4.39373e-07	2.48532e-05	Gsdmd		ENSMUSG00000027286	562.15	-0.402482	0.756556	0.114516	-3.51465	0.000440337	0.00559816	Lrrc57
ENSMUSG00000081769	61.3003	1.29345	2.45113	0.388502	3.32932	0.000870585	0.00926487	Gm12216		ENSMUSG00000023827	1503.45	-0.401614	0.757011	0.112213	-3.57902	0.000344883	0.00465656	Agpat4
ENSMUSG00000028613	112.347	1.29539	2.45443	0.308967	4.19265	2.75719e-05	0.000683259	Lrp8		ENSMUSG00000030067	764.187	-0.401169	0.757245	0.115682	-3.46786	0.000524616	0.00638372	Foxp1
ENSMUSG00000056116	2691.79	1.29655	2.45641	0.405658	3.19616	0.00139268	0.0133678	H2-T22		ENSMUSG00000032431	2224.68	-0.400966	0.757351	0.102099	-3.92722	8.59e-05	0.00164965	Crtap
ENSMUSG00000019866	42.7868	1.29833	2.45944	0.385743	3.36579	0.000763246	0.00844232	Crybg1		ENSMUSG00000030579	400.905	-0.400807	0.757434	0.13283	-3.01744	0.00254923	0.0210514	Tyrobp
ENSMUSG00000038552	640.506	1.3	2.46229	0.228516	5.68889	1.27867e-08	1.32203e-06	Fndc4		ENSMUSG00000024413	1550.74	-0.400756	0.757461	0.136275	-2.94078	0.00327383	0.025315	Npc1
ENSMUSG00000062593	222.386	1.30067	2.46342	0.26257	4.95359	7.2856e-07	3.7034e-05	Lilrb4a		ENSMUSG00000008036	1898.09	-0.400486	0.757603	0.105819	-3.78464	0.000153932	0.00257852	Ap2s1
ENSMUSG00000000317	649.335	1.30281	2.46708	0.208163	6.2586	3.8846e-10	7.4872e-08	Bcl6b		ENSMUSG00000029718	17886.7	-0.400189	0.757759	0.0993288	-4.02893	5.6e-05	0.00118053	Pcolce
ENSMUSG00000037921	554.06	1.31159	2.48216	0.214934	6.10231	1.04544e-09	1.755e-07	Ddx60		ENSMUSG00000050379	997.572	-0.399796	0.757965	0.113961	-3.50819	0.000451171	0.00570801	2020-09-06
ENSMUSG00000034730	54.3566	1.32388	2.50339	0.406502	3.25676	0.0011269	0.0113212	Adgrb1		ENSMUSG00000027999	1024.92	-0.399559	0.75809	0.124578	-3.20729	0.00133993	0.0129687	Pla2g12a
ENSMUSG00000074657	82.603	1.33482	2.52245	0.326869	4.08367	4.43304e-05	0.000993526	Kif5a		ENSMUSG00000028998	2169.73	-0.398646	0.75857	0.0992696	-4.01579	5.92e-05	0.00122672	Tomm7
ENSMUSG00000111394	126.714	1.33962	2.53085	0.291237	4.59976	4.22983e-06	0.000153572	NA		ENSMUSG00000034403	4159.97	-0.398595	0.758597	0.106174	-3.75416	0.000173926	0.00281091	Pja1
ENSMUSG00000023236	117.867	1.347	2.54383	0.488007	2.76021	0.00577644	0.0382126	Scg5		ENSMUSG00000057530	4414.81	-0.398593	0.758598	0.0903804	-4.41017	1.03e-05	0.000301973	Ece1
ENSMUSG00000026628	106.439	1.34778	2.5452	0.273667	4.92489	8.44098e-07	4.14404e-05	Atf3		ENSMUSG00000027332	4648.34	-0.398447	0.758674	0.125547	-3.1737	0.00150511	0.0142324	Ivd
ENSMUSG00000037731	166.075	1.35199	2.55264	0.262229	5.15575	2.52615e-07	1.57124e-05	Themis2		ENSMUSG00000049536	903.461	-0.397923	0.75895	0.121978	-3.26224	0.00110536	0.0111623	Tceal1
ENSMUSG00000024659	215.905	1.35742	2.56226	0.358401	3.78743	0.000152213	0.00255521	Anxa1		ENSMUSG00000030946	588.184	-0.397336	0.759259	0.134407	-2.95621	0.00311442	0.0243843	Lhpp
ENSMUSG00000028480	76.5473	1.35752	2.56245	0.404897	3.35276	0.000800094	0.00872282	Glipr2		ENSMUSG00000057375	817.879	-0.396752	0.759566	0.139409	-2.84595	0.00442785	0.0316228	Yipf1
ENSMUSG00000067780	47.3904	1.3639	2.5738	0.454181	3.00299	0.00267342	0.0216705	Pi15		ENSMUSG00000016940	1181.63	-0.39649	0.759704	0.102114	-3.88283	0.000103246	0.00188966	Kctd2
ENSMUSG00000026104	6443.3	1.36828	2.58163	0.316924	4.31738	1.57889e-05	0.000433664	Stat1		ENSMUSG00000031353	4386.95	-0.396487	0.759706	0.0907323	-4.36985	1.24e-05	0.000352281	Rbbp7
ENSMUSG00000029605	96.8701	1.37555	2.59466	0.336575	4.08689	4.37188e-05	0.000984903	Oas1b		ENSMUSG00000028464	1818.56	-0.396307	0.759801	0.101142	-3.91833	8.92e-05	0.00169967	Tpm2
ENSMUSG00000024066	4632.86	1.39119	2.62296	0.350227	3.97226	7.11951e-05	0.00142683	Xdh		ENSMUSG00000028861	1153.88	-0.39596	0.759983	0.105875	-3.73989	0.000184098	0.0029418	Mrps15
ENSMUSG00000038352	28.878	1.39163	2.62376	0.467268	2.97824	0.0028991	0.0231158	Arl5c		ENSMUSG00000054091	925.474	-0.395824	0.760055	0.108498	-3.64822	0.000264065	0.00383496	1810037I17Rik
ENSMUSG00000003283	261.803	1.39263	2.62557	0.234591	5.93643	2.91298e-09	3.98924e-07	Hck		ENSMUSG00000044252	1060.27	-0.395795	0.76007	0.0983743	-4.02336	5.74e-05	0.00120233	Osbpl1a
ENSMUSG00000090958	556.222	1.39342	2.62701	0.228791	6.09036	1.12658e-09	1.85138e-07	Lrrc32		ENSMUSG00000060376	3278.62	-0.395706	0.760117	0.120082	-3.29529	0.000983195	0.0102195	Bckdha
ENSMUSG00000087028	32.315	1.39728	2.63404	0.475115	2.94093	0.00327232	0.025315	Gm13387		ENSMUSG00000002416	845.428	-0.39558	0.760184	0.119442	-3.31191	0.000926623	0.0097669	Ndufb2
ENSMUSG00000030878	127.728	1.40756	2.65288	0.249606	5.63911	1.70933e-08	1.67837e-06	Cdr2		ENSMUSG00000024187	1699.61	-0.395027	0.760475	0.124397	-3.17555	0.00149554	0.0141677	Fam234a
ENSMUSG00000015533	51.7955	1.41505	2.66669	0.42477	3.33134	0.000864303	0.00922317	Itga2		ENSMUSG00000001418	1930.95	-0.394907	0.760538	0.101887	-3.87594	0.000106212	0.00192588	Glmp
ENSMUSG00000038179	117.352	1.41771	2.67162	0.377071	3.75981	0.000170045	0.00275961	Slamf7		ENSMUSG00000027589	2749.64	-0.394756	0.760618	0.109319	-3.61104	0.000304969	0.00425866	Pcmtd2
ENSMUSG00000019122	343.724	1.4214	2.67845	0.228968	6.20784	5.37168e-10	9.63938e-08	Ccl9		ENSMUSG00000028582	1000.01	-0.394717	0.760639	0.103097	-3.82858	0.000128884	0.00224569	Cc2d1b
ENSMUSG00000079419	562.509	1.43067	2.69572	0.204549	6.99426	2.66658e-12	1.26153e-09	Ms4a6c		ENSMUSG00000001555	1037.48	-0.394655	0.760671	0.125602	-3.14212	0.0016773	0.0154856	Fkbp10
ENSMUSG00000006930	816.887	1.43317	2.7004	0.483707	2.9629	0.00304759	0.0239572	Hap1		ENSMUSG00000056698	452.911	-0.3945	0.760753	0.140015	-2.81756	0.00483895	0.0336401	Elmod3
ENSMUSG00000033880	4647.92	1.4364	2.70644	0.383648	3.74405	0.000181078	0.00291142	Lgals3bp		ENSMUSG00000032239	809.881	-0.394461	0.760773	0.121283	-3.2524	0.00114435	0.0114596	Rp9
ENSMUSG00000027360	53.7844	1.43661	2.70685	0.509561	2.81931	0.00481264	0.0334975	Hdc		ENSMUSG00000039953	2971.26	-0.393554	0.761252	0.113537	-3.46632	0.000527641	0.00641488	Clstn1
ENSMUSG00000030022	357.981	1.43857	2.71053	0.1982	7.25818	3.92328e-13	2.7841e-10	Adamts9		ENSMUSG00000001138	766.058	-0.393389	0.761339	0.115119	-3.41722	0.000632631	0.00737062	Cnnm3
ENSMUSG00000036760	544.165	1.44172	2.71645	0.162174	8.88999	6.11162e-19	2.38537e-15	Kcnk9		ENSMUSG00000017707	40025.1	-0.393158	0.761461	0.11114	-3.5375	0.000403932	0.00522468	Serinc3
ENSMUSG00000025044	238.114	1.45658	2.74456	0.2643	5.51107	3.56655e-08	3.09339e-06	Msr1		ENSMUSG00000047843	833.96	-0.393122	0.76148	0.142888	-2.75125	0.0059368	0.0389271	Bri3
ENSMUSG00000027398	48.4097	1.46099	2.75297	0.47723	3.0614	0.00220304	0.0189945	Il1b		ENSMUSG00000073700	744.456	-0.392563	0.761775	0.130136	-3.01657	0.0025565	0.0210952	Klhl21
ENSMUSG00000056529	66.3178	1.46187	2.75465	0.386889	3.77853	0.000157755	0.00262287	Ptafr		ENSMUSG00000040048	2500.4	-0.39228	0.761924	0.101105	-3.87993	0.000104488	0.00190347	Ndufb10
ENSMUSG00000097305	172.908	1.46701	2.76449	0.399685	3.67042	0.000242151	0.00361427	NA		ENSMUSG00000058135	7042.33	-0.391634	0.762266	0.0807625	-4.84921	1.24e-06	5.56e-05	Gstm1
ENSMUSG00000022014	218.717	1.47206	2.77419	0.272743	5.39725	6.76688e-08	5.12837e-06	Epsti1		ENSMUSG00000019478	804.426	-0.390833	0.762689	0.128947	-3.03097	0.00243772	0.0204063	Rab4a
ENSMUSG00000046879	2404.85	1.47561	2.78101	0.545856	2.7033	0.00686554	0.0434298	Irgm1		ENSMUSG00000038079	662.846	-0.390567	0.76283	0.143657	-2.71875	0.0065529	0.0419794	Tmem237
ENSMUSG00000010358	2216.99	1.47579	2.78137	0.367176	4.01931	5.83679e-05	0.00121661	Ifi35		ENSMUSG00000085793	461.886	-0.389984	0.763138	0.124168	-3.14079	0.00168493	0.0155284	Lin52
ENSMUSG00000025491	177.188	1.47625	2.78224	0.220823	6.6852	2.30614e-11	7.50072e-09	Ifitm1		ENSMUSG00000020022	1096.51	-0.389828	0.763221	0.114153	-3.41495	0.000637942	0.00740829	Ndufa12
ENSMUSG00000025790	583.866	1.47753	2.78471	0.279945	5.27792	1.30656e-07	8.8687e-06	Slco3a1		ENSMUSG00000059278	1192.96	-0.389711	0.763282	0.124017	-3.14239	0.00167575	0.0154804	Naa38
ENSMUSG00000058258	125.857	1.48336	2.79599	0.43974	3.37326	0.000742838	0.00828963	Idi1		ENSMUSG00000022359	603.816	-0.389483	0.763403	0.112056	-3.47579	0.000509357	0.00624182	Wdyhv1
ENSMUSG00000027313	78.6081	1.48376	2.79676	0.442033	3.35666	0.000788896	0.00863087	Chac1		ENSMUSG00000050043	1588.89	-0.389267	0.763517	0.104894	-3.71104	0.000206412	0.00321608	Tmx2
ENSMUSG00000067212	2687.72	1.48609	2.8013	0.393404	3.77753	0.000158391	0.00262843	H2-T23		ENSMUSG00000031399	681.151	-0.389114	0.763599	0.130793	-2.97502	0.00292965	0.0233111	Fam3a
ENSMUSG00000002204	36.0575	1.48807	2.80514	0.427771	3.47866	0.000503919	0.00618976	Napsa		ENSMUSG00000024082	790.239	-0.388984	0.763667	0.129158	-3.01169	0.002598	0.021269	Ndufaf7
ENSMUSG00000030107	667.085	1.48903	2.80701	0.456868	3.25922	0.0011172	0.0112527	Usp18		ENSMUSG00000043190	582.681	-0.388845	0.763741	0.134508	-2.89087	0.00384172	0.0285509	Rfesd
ENSMUSG00000042622	115.873	1.49062	2.8101	0.273138	5.45738	4.83206e-08	4.03412e-06	Maff		ENSMUSG00000086784	531.329	-0.388489	0.763929	0.126665	-3.06707	0.00216169	0.0187595	Isoc2a
ENSMUSG00000026980	38.5684	1.49227	2.81331	0.446212	3.34431	0.000824889	0.00889991	Ly75		ENSMUSG00000071454	657.683	-0.388211	0.764077	0.139799	-2.77693	0.00548748	0.0368951	Dtnb
ENSMUSG00000027639	1440.1	1.49498	2.8186	0.44477	3.36123	0.000775958	0.00852665	Samhd1		ENSMUSG00000073987	1680.45	-0.38805	0.764162	0.11516	-3.36965	0.000752631	0.008369	Ggh
ENSMUSG00000012428	641.416	1.49971	2.82787	0.461595	3.24898	0.00115818	0.0115685	Steap4		ENSMUSG00000062963	3220.11	-0.387581	0.76441	0.100011	-3.8754	0.000106451	0.00192797	Ufc1
ENSMUSG00000029664	56.2618	1.49989	2.82822	0.442717	3.38793	0.000704215	0.00795528	Tfpi2		ENSMUSG00000029166	753.793	-0.38739	0.764511	0.119787	-3.234	0.00122068	0.0120539	Mapre3
ENSMUSG00000039699	66.5635	1.51009	2.84828	0.469795	3.21436	0.00130735	0.0127246	Batf2		ENSMUSG00000078517	1023.26	-0.387314	0.764552	0.107357	-3.60773	0.000308885	0.00429032	Emc1
ENSMUSG00000014030	51.7373	1.51195	2.85196	0.433157	3.49054	0.000482041	0.00600439	Pax5		ENSMUSG00000025736	1891.39	-0.387204	0.76461	0.0969109	-3.99546	6.46e-05	0.00132462	Jmjd8
ENSMUSG00000049103	184.944	1.514	2.856	0.326173	4.6417	3.45554e-06	0.000129885	Ccr2		ENSMUSG00000051355	783.685	-0.387143	0.764643	0.130126	-2.97513	0.00292869	0.0233111	Commd1
ENSMUSG00000000392	22.9311	1.51557	2.85912	0.48968	3.09502	0.00196797	0.0175065	Fap		ENSMUSG00000031375	2594.2	-0.386833	0.764807	0.132928	-2.91009	0.00361324	0.0272909	Bgn
ENSMUSG00000000120	36.4276	1.51946	2.86684	0.568196	2.67419	0.00749103	0.0462985	Ngfr		ENSMUSG00000090733	9902.75	-0.385691	0.765412	0.12237	-3.15184	0.00162244	0.0151131	Rps27
ENSMUSG00000026222	1080.84	1.5227	2.87328	0.41714	3.65033	0.000261901	0.00381418	Sp100		ENSMUSG00000031221	1593.18	-0.385546	0.765489	0.115085	-3.35011	0.000807803	0.00878233	Igbp1
ENSMUSG00000015947	299.79	1.52433	2.87654	0.251118	6.07018	1.27763e-09	2.03534e-07	Fcgr1		ENSMUSG00000039197	1900.49	-0.38546	0.765535	0.122355	-3.15033	0.00163084	0.0151372	Adk
ENSMUSG00000001131	1445.66	1.53732	2.90255	0.215718	7.12652	1.02939e-12	5.54167e-10	Timp1		ENSMUSG00000036622	1044.97	-0.385242	0.765651	0.117773	-3.27104	0.00107152	0.0109052	Atp13a2
ENSMUSG00000038507	1469.51	1.5462	2.92047	0.219112	7.05667	1.70543e-12	8.32035e-10	Parp12		ENSMUSG00000038502	2552.76	-0.384649	0.765965	0.101798	-3.77854	0.000157752	0.00262287	Ptov1
ENSMUSG00000035615	34.6102	1.55188	2.932	0.546535	2.83949	0.00451851	0.0320966	Frmpd1		ENSMUSG00000030683	657.989	-0.383427	0.766615	0.129188	-2.96798	0.00299762	0.0236626	Sez6l2
ENSMUSG00000031963	25.5379	1.56672	2.96231	0.503993	3.10862	0.00187962	0.0169133	Bmper		ENSMUSG00000004285	1878.59	-0.383375	0.766642	0.110606	-3.46613	0.000527999	0.00641488	Atp6v1f
ENSMUSG00000053318	49.025	1.5909	3.01237	0.440645	3.61039	0.000305738	0.00426079	Slamf8		ENSMUSG00000016427	1827.8	-0.383306	0.766679	0.12409	-3.08894	0.0020087	0.0177763	Ndufa1
ENSMUSG00000097789	491.749	1.60049	3.03247	0.240926	6.6431	3.07155e-11	9.78633e-09	NA		ENSMUSG00000036225	515.718	-0.382621	0.767043	0.12937	-2.95757	0.00310071	0.0242892	Kctd1
ENSMUSG00000056553	81.2542	1.60875	3.04987	0.561651	2.86432	0.00417907	0.0302755	Ptprn2		ENSMUSG00000028684	1255.69	-0.382479	0.767119	0.132147	-2.89434	0.00379953	0.0283307	Urod
ENSMUSG00000049988	126.85	1.61462	3.0623	0.356761	4.52577	6.01755e-06	0.000199962	Lrrc25		ENSMUSG00000025144	682.659	-0.382245	0.767243	0.133245	-2.86874	0.0041211	0.0299807	Cenpx
ENSMUSG00000041992	241.542	1.62632	3.08725	0.201018	8.09042	5.94603e-16	1.16037e-12	Rapgef5		ENSMUSG00000046318	3166.99	-0.381957	0.767396	0.1251	-3.05322	0.00226404	0.0193996	Ccbe1
ENSMUSG00000008496	145.93	1.62991	3.09493	0.384295	4.24129	2.22235e-05	0.000571587	Pou2f2		ENSMUSG00000041958	1229.72	-0.381591	0.767591	0.130356	-2.9273	0.00341916	0.026235	Pigs
ENSMUSG00000020638	1455.78	1.6301	3.09534	0.514166	3.17037	0.00152243	0.0143875	Cmpk2		ENSMUSG00000024588	3432.3	-0.380854	0.767983	0.130556	-2.91716	0.00353239	0.0268313	Fech
ENSMUSG00000070034	174.142	1.63885	3.11418	0.308148	5.31838	1.04693e-07	7.39575e-06	Sp110		ENSMUSG00000028843	1243.95	-0.38063	0.768102	0.109579	-3.47356	0.000513596	0.00627898	Sh3bgrl3
ENSMUSG00000031342	170.509	1.64806	3.13413	0.233448	7.05965	1.66919e-12	8.32035e-10	Gpm6b		ENSMUSG00000041697	5138.96	-0.379913	0.768484	0.0981925	-3.86906	0.000109254	0.00197415	Cox6a1
ENSMUSG00000073489	633.271	1.64877	3.13566	0.250526	6.58122	4.6659e-11	1.25593e-08	Ifi204		ENSMUSG00000028207	2311.73	-0.379879	0.768502	0.112682	-3.37124	0.000748305	0.00832683	Asph
ENSMUSG00000035165	42.6864	1.65611	3.15165	0.50891	3.25423	0.00113702	0.0114082	Kcne3		ENSMUSG00000037787	1258.02	-0.379795	0.768547	0.0991864	-3.8291	0.000128612	0.00224569	Apopt1
ENSMUSG00000016349	75.8425	1.65805	3.15589	0.609011	2.72252	0.00647861	0.0415376	Eef1a2		ENSMUSG00000020525	462.302	-0.379644	0.768627	0.125933	-3.01465	0.00257273	0.0211732	Ppm1d
ENSMUSG00000037411	118.986	1.66121	3.16281	0.493674	3.36499	0.000765467	0.00844232	Serpine1		ENSMUSG00000076435	4096.85	-0.379547	0.768679	0.110818	-3.42495	0.000614905	0.00722884	Acsf2
ENSMUSG00000026573	23.7912	1.66736	3.17633	0.569925	2.92558	0.00343819	0.0263381	Xcl1		ENSMUSG00000020485	724.945	-0.379509	0.768699	0.115361	-3.28976	0.00100273	0.0103468	Supt4a
ENSMUSG00000047443	363.609	1.6766	3.19674	0.620099	2.70377	0.00685581	0.0433858	Erfe		ENSMUSG00000020846	1027.39	-0.37912	0.768907	0.113713	-3.334	0.000856066	0.00918809	Rflnb
ENSMUSG00000055413	55.9172	1.68684	3.2195	0.51982	3.24504	0.00117434	0.0116701	H2-Q5		ENSMUSG00000000399	2817.23	-0.378883	0.769033	0.0956117	-3.96272	7.41e-05	0.00147181	Ndufa9
ENSMUSG00000075010	363.859	1.69969	3.24831	0.524669	3.23954	0.00119723	0.0118598	AW112010		ENSMUSG00000030432	4985.91	-0.37884	0.769056	0.105146	-3.603	0.000314565	0.00435901	Rpl28
ENSMUSG00000037242	4473.53	1.7089	3.26911	0.441875	3.86738	0.000110013	0.00198156	Clic4		ENSMUSG00000027634	1435.83	-0.37882	0.769067	0.116355	-3.25571	0.00113109	0.011356	Ndrg3
ENSMUSG00000024308	5755.04	1.71041	3.27253	0.342902	4.98804	6.09949e-07	3.20624e-05	Tapbp		ENSMUSG00000022956	2926.27	-0.37858	0.769194	0.101803	-3.71876	0.000200205	0.00313186	Atp5o
ENSMUSG00000046031	63.1977	1.71511	3.28322	0.502741	3.41152	0.00064602	0.0074835	Fam26f		ENSMUSG00000028108	7870.55	-0.378167	0.769414	0.104961	-3.60291	0.000314669	0.00435901	Ecm1
ENSMUSG00000097754	19.5425	1.71588	3.28498	0.601361	2.85333	0.00432636	0.0310543	Ptgs2os2		ENSMUSG00000024194	1197.46	-0.378081	0.76946	0.110892	-3.40945	0.000650939	0.00753333	Cuta
ENSMUSG00000035352	18.722	1.72625	3.30867	0.631338	2.73427	0.00625179	0.0404729	Ccl12		ENSMUSG00000048756	1492.51	-0.377343	0.769854	0.128297	-2.94117	0.00326976	0.0253086	Foxo3
ENSMUSG00000026271	40.2842	1.74426	3.35023	0.440361	3.96097	7.46453e-05	0.00148076	Gpr35		ENSMUSG00000022091	2373.8	-0.377229	0.769915	0.101732	-3.70807	0.000208844	0.00324139	Sorbs3
ENSMUSG00000030921	1980.12	1.76071	3.38865	0.390246	4.5118	6.42807e-06	0.000209629	Trim30a		ENSMUSG00000021497	1769.36	-0.377164	0.76995	0.108596	-3.47309	0.0005145	0.0062802	Txndc15
ENSMUSG00000034459	2416.72	1.77724	3.4277	0.605139	2.93691	0.00331498	0.0255699	Ifit1		ENSMUSG00000002778	2965.8	-0.37703	0.770021	0.103217	-3.65277	0.000259423	0.00379082	Kdelr1
ENSMUSG00000049511	18.1366	1.78012	3.43454	0.630158	2.82487	0.00472997	0.033114	Htr1b		ENSMUSG00000074227	524.172	-0.376807	0.77014	0.142174	-2.65032	0.00804165	0.048586	Spint2
ENSMUSG00000037849	139	1.78457	3.44517	0.367739	4.85282	1.21716e-06	5.47616e-05	LOC102639543		ENSMUSG00000022751	733.336	-0.376755	0.770168	0.130805	-2.88029	0.00397316	0.0292313	Nit2
ENSMUSG00000026896	2147.73	1.79036	3.45901	0.429733	4.16621	3.09704e-05	0.000754305	Ifih1		ENSMUSG00000020921	428.781	-0.376701	0.770197	0.136542	-2.75887	0.00580013	0.0383206	Tmem101
ENSMUSG00000034266	33.0448	1.79663	3.47409	0.624303	2.87782	0.00400429	0.0293773	Batf		ENSMUSG00000009863	5337.97	-0.37644	0.770336	0.116368	-3.23491	0.0012168	0.0120232	Sdhb
ENSMUSG00000035095	17.5339	1.80088	3.48434	0.568336	3.1687	0.00153123	0.0144445	Fam167a		ENSMUSG00000022620	517.916	-0.375772	0.770693	0.141996	-2.64636	0.00813625	0.0490247	Arsa
ENSMUSG00000024678	134.803	1.81745	3.52458	0.379399	4.79035	1.66494e-06	7.1606e-05	Ms4a4d		ENSMUSG00000032324	2666.43	-0.375476	0.770851	0.124272	-3.02139	0.00251615	0.0208674	Tspan3
ENSMUSG00000018986	68.9412	1.8246	3.54209	0.308412	5.91611	3.2964e-09	4.4365e-07	Slfn3		ENSMUSG00000017760	2328.58	-0.375264	0.770964	0.11907	-3.15163	0.00162361	0.0151149	Ctsa
ENSMUSG00000047798	40.3845	1.82521	3.54359	0.396067	4.60834	4.05891e-06	0.00014771	Cd300lf		ENSMUSG00000049960	1063.41	-0.375002	0.771104	0.107933	-3.47439	0.000512011	0.00626451	Mrps16
ENSMUSG00000084846	15.6477	1.83951	3.57887	0.669079	2.74931	0.00597207	0.0390599	NA		ENSMUSG00000006782	2232.33	-0.374939	0.771138	0.0941927	-3.98055	6.88e-05	0.00139045	Cnp
ENSMUSG00000023328	26.7274	1.84016	3.58051	0.696619	2.64156	0.00825245	0.0495528	Ache		ENSMUSG00000030284	740.557	-0.374583	0.771328	0.13279	-2.82087	0.00478937	0.0333653	Creld1
ENSMUSG00000036766	24.0861	1.85022	3.60556	0.681328	2.71562	0.00661528	0.0422909	Dner		ENSMUSG00000039031	1553.65	-0.374412	0.77142	0.111256	-3.36531	0.000764583	0.00844232	Arhgap18
ENSMUSG00000048388	37.3997	1.85266	3.61165	0.644173	2.87603	0.00402717	0.0295036	Fam171b		ENSMUSG00000019066	1390.32	-0.374138	0.771566	0.112223	-3.33389	0.000856419	0.00918809	Rab3d
ENSMUSG00000023132	55.3935	1.85599	3.62	0.364651	5.08977	3.58496e-07	2.10421e-05	Gzma		ENSMUSG00000037235	4138.04	-0.37394	0.771672	0.10093	-3.70495	0.000211429	0.00327464	Mxd4
ENSMUSG00000020901	64.7091	1.86543	3.64376	0.441582	4.22443	2.39549e-05	0.000607116	Pik3r5		ENSMUSG00000034118	2515.44	-0.373884	0.771702	0.121707	-3.072	0.00212632	0.0185731	Tpst1
ENSMUSG00000037577	14.3336	1.87316	3.66334	0.662982	2.82536	0.00472278	0.0331063	Ephx3		ENSMUSG00000037706	12216.7	-0.373781	0.771757	0.0803259	-4.65331	3.27e-06	0.000124382	Cd81
ENSMUSG00000040428	90.9741	1.87674	3.67246	0.365282	5.1378	2.7797e-07	1.68204e-05	Plekha4		ENSMUSG00000060591	3403.98	-0.37343	0.771945	0.0850269	-4.3919	1.12e-05	0.000323663	Ifitm2
ENSMUSG00000058818	161.281	1.87992	3.68054	0.380394	4.94203	7.73147e-07	3.88115e-05	Pirb		ENSMUSG00000020744	884.72	-0.372946	0.772204	0.102808	-3.62758	0.000286086	0.0040493	Slc25a19
ENSMUSG00000106734	238.581	1.88087	3.68298	0.327029	5.75141	8.85044e-09	9.86951e-07	NA		ENSMUSG00000039195	1829.96	-0.37279	0.772287	0.0985776	-3.78169	0.000155766	0.00260088	1110008P14Rik
ENSMUSG00000026587	45.9916	1.89084	3.70851	0.675905	2.79749	0.00515013	0.0351108	Astn1		ENSMUSG00000023089	1493.9	-0.372568	0.772406	0.0984649	-3.78377	0.000154473	0.00258481	Ndufa5
ENSMUSG00000040329	22.6956	1.8926	3.71303	0.559217	3.38437	0.000713413	0.00803593	Il7		ENSMUSG00000039852	2805.15	-0.37207	0.772673	0.123984	-3.00095	0.0026914	0.0217711	Rere
ENSMUSG00000025492	9861.43	1.90675	3.74964	0.417014	4.57239	4.82186e-06	0.000168787	Ifitm3		ENSMUSG00000022312	3957.08	-0.371678	0.772883	0.105044	-3.53832	0.000402676	0.00521275	Eif3h
ENSMUSG00000024053	39.7693	1.90763	3.75192	0.495693	3.84841	0.000118889	0.0021068	Emilin2		ENSMUSG00000031059	2905.03	-0.371539	0.772958	0.103435	-3.59201	0.000328139	0.00451328	Ndufb11
ENSMUSG00000031897	2225.82	1.90765	3.75198	0.214131	8.90881	5.15842e-19	2.38537e-15	Psmb10		ENSMUSG00000009406	498.336	-0.371503	0.772977	0.124182	-2.99161	0.00277506	0.0223049	Elk1
ENSMUSG00000032181	61.2173	1.90803	3.75298	0.618896	3.08297	0.00204949	0.0180466	Scg3		ENSMUSG00000023055	2951.26	-0.371432	0.773015	0.0967248	-3.84009	0.000122989	0.00217453	Calcoco1
ENSMUSG00000091649	266.73	1.90817	3.75333	0.288775	6.60781	3.90039e-11	1.1222e-08	Phf11b		ENSMUSG00000028618	10084.8	-0.370985	0.773254	0.101608	-3.65112	0.000261099	0.00380605	Tmem59
ENSMUSG00000030786	55.4763	1.91193	3.76313	0.389764	4.90536	9.32553e-07	4.4797e-05	Itgam		ENSMUSG00000024026	1248.67	-0.369922	0.773825	0.1378	-2.68449	0.00726407	0.0453445	Glo1
ENSMUSG00000043740	16.119	1.91452	3.76989	0.701192	2.73038	0.00632614	0.0408452	B430306N03Rik		ENSMUSG00000002015	3521.86	-0.369823	0.773878	0.103492	-3.57346	0.000352298	0.0047211	Bcap31
ENSMUSG00000017652	157.362	1.9154	3.77218	0.422036	4.53847	5.66637e-06	0.000191065	Cd40		ENSMUSG00000003380	3083.47	-0.3698	0.77389	0.111973	-3.3026	0.000957939	0.0100371	Rabac1
ENSMUSG00000022893	823.283	1.91624	3.77439	0.424344	4.51578	6.30847e-06	0.000207343	Adamts1		ENSMUSG00000028949	448.836	-0.369755	0.773914	0.125132	-2.95492	0.00312754	0.024438	Smarcd3
ENSMUSG00000046718	5134.33	1.95502	3.87721	0.494722	3.95176	7.75786e-05	0.00152155	Bst2		ENSMUSG00000058833	1280.22	-0.369298	0.774159	0.121826	-3.03136	0.00243452	0.0204014	Rex1bd
ENSMUSG00000045532	61.9847	1.95558	3.87873	0.667463	2.92988	0.00339098	0.0260532	C1ql1		ENSMUSG00000025579	2168.12	-0.368064	0.774821	0.120267	-3.0604	0.0022104	0.0190341	Gaa
ENSMUSG00000074151	444.002	1.96318	3.89919	0.463256	4.23777	2.25746e-05	0.00057871	Nlrc5		ENSMUSG00000024914	2972.61	-0.367383	0.775187	0.100274	-3.66379	0.000248513	0.00368451	Drap1
ENSMUSG00000027737	19.8689	1.96456	3.90293	0.66196	2.96779	0.00299951	0.0236626	Slc7a11		ENSMUSG00000031029	3768.78	-0.367322	0.77522	0.0746257	-4.92219	8.56e-07	4.18e-05	Eif3f
ENSMUSG00000030124	22.9209	1.96624	3.90748	0.665777	2.9533	0.00314393	0.024517	Lag3		ENSMUSG00000004394	2190.42	-0.366884	0.775455	0.0975011	-3.76287	0.000167972	0.00274307	Tmed4
ENSMUSG00000068245	443.714	1.97027	3.91842	0.298263	6.60581	3.95343e-11	1.1222e-08	Phf11d		ENSMUSG00000015474	520.397	-0.36678	0.775512	0.121196	-3.02633	0.0024754	0.0206331	Ppt2
ENSMUSG00000048621	48.6617	1.9725	3.92448	0.430396	4.58299	4.58369e-06	0.000162638	Gm6377		ENSMUSG00000030824	3812.09	-0.366414	0.775708	0.10886	-3.36591	0.000762912	0.00844232	Nucb1
ENSMUSG00000073491	229.274	1.98164	3.94941	0.289129	6.85382	7.19024e-12	2.80635e-09	Ifi213		ENSMUSG00000078619	2070.59	-0.366293	0.775773	0.106485	-3.43985	0.000582031	0.00693936	Smarcd2
ENSMUSG00000020598	24.2611	1.98941	3.97075	0.708317	2.80865	0.00497498	0.0343214	Nrcam		ENSMUSG00000003955	1177.42	-0.366217	0.775814	0.102107	-3.58658	0.000335037	0.00457478	Fam162a
ENSMUSG00000039116	15.8975	2.00349	4.0097	0.713225	2.80906	0.00496861	0.0342927	Adgrg6		ENSMUSG00000037563	3026.73	-0.365939	0.775964	0.118823	-3.07971	0.00207205	0.0181735	Rps16
ENSMUSG00000090698	313.966	2.01451	4.04043	0.336823	5.98091	2.21889e-09	3.23751e-07	Apold1		ENSMUSG00000010057	354.044	-0.365132	0.776398	0.138275	-2.64062	0.00827546	0.0496146	Nprl2
ENSMUSG00000022797	1625.91	2.01843	4.05142	0.524438	3.84874	0.000118727	0.00210632	Tfrc		ENSMUSG00000003429	8582.55	-0.364767	0.776594	0.102505	-3.55852	0.00037295	0.00490936	Rps11
ENSMUSG00000030144	17.2635	2.01847	4.05155	0.693882	2.90896	0.00362635	0.0273368	Clec4d		ENSMUSG00000005469	3569.06	-0.364606	0.776681	0.074832	-4.87233	1.1e-06	5.06e-05	Prkaca
ENSMUSG00000072621	53.563	2.02514	4.0703	0.474138	4.2712	1.94427e-05	0.00051187	Slfn10-ps		ENSMUSG00000003680	797.874	-0.364301	0.776845	0.101625	-3.58476	0.000337389	0.00458826	Tmem179b
ENSMUSG00000049037	154.083	2.02847	4.07972	0.311185	6.51855	7.09926e-11	1.77827e-08	Clec4a1		ENSMUSG00000002580	1386.39	-0.363986	0.777015	0.120457	-3.02169	0.00251365	0.0208674	Mien1
ENSMUSG00000001123	1814.82	2.04131	4.11618	0.526387	3.87796	0.000105337	0.0019167	Lgals9		ENSMUSG00000042826	523.668	-0.363552	0.777249	0.126251	-2.8796	0.00398179	0.0292523	Fgf11
ENSMUSG00000021587	70.408	2.0433	4.12188	0.567279	3.60194	0.000315854	0.00437155	Pcsk1		ENSMUSG00000033020	1101.57	-0.36329	0.77739	0.127703	-2.8448	0.00444389	0.0316939	Polr2f
ENSMUSG00000033576	158.711	2.04749	4.13387	0.425831	4.80823	1.52275e-06	6.65913e-05	Apol6		ENSMUSG00000055553	1134.85	-0.362562	0.777782	0.106097	-3.41726	0.000632552	0.00737062	Kxd1
ENSMUSG00000079297	10.5757	2.06258	4.17732	0.735693	2.80359	0.00505377	0.0346963	NA		ENSMUSG00000031708	3926.66	-0.362292	0.777928	0.101286	-3.57694	0.000347646	0.00467481	Tecr
ENSMUSG00000025473	23.9305	2.06616	4.18771	0.555179	3.72161	0.000197955	0.00310289	Adam8		ENSMUSG00000007476	527.297	-0.362149	0.778005	0.121285	-2.98592	0.00282727	0.0226124	Lrrc8a
ENSMUSG00000035929	3216.09	2.06924	4.19666	0.510356	4.0545	5.02411e-05	0.00109258	H2-Q4		ENSMUSG00000028973	1256.74	-0.361535	0.778336	0.131242	-2.75472	0.00587419	0.0386189	Abcb8
ENSMUSG00000061171	45.1558	2.07564	4.2153	0.780337	2.65992	0.00781586	0.04765	Slc38a11		ENSMUSG00000053929	3260.54	-0.361399	0.778409	0.0879047	-4.11126	3.94e-05	0.000910149	Cyhr1
ENSMUSG00000078921	157.693	2.09912	4.28449	0.723083	2.90302	0.00369584	0.0277134	Tgtp2		ENSMUSG00000037710	834.969	-0.361369	0.778425	0.11516	-3.13799	0.00170112	0.0156182	Cisd1
ENSMUSG00000078922	62.2371	2.10529	4.30285	0.575927	3.65548	0.000256698	0.00377006	Tgtp1		ENSMUSG00000041650	1898.47	-0.361019	0.778614	0.123661	-2.91942	0.00350678	0.0267324	Pcca
ENSMUSG00000048852	29.8714	2.10669	4.30702	0.605076	3.48169	0.000498252	0.00613463	Gm12185		ENSMUSG00000024457	1210.56	-0.360655	0.778811	0.111192	-3.24352	0.00118062	0.0117251	Trim26
ENSMUSG00000078853	1429	2.12208	4.35321	0.726424	2.92127	0.00348612	0.0266008	Igtp		ENSMUSG00000048222	655.326	-0.360124	0.779097	0.112722	-3.1948	0.00139927	0.0134185	Mfap1b
ENSMUSG00000099974	18.1559	2.12763	4.36999	0.668876	3.1809	0.00146816	0.0139591	Bcl2a1d		ENSMUSG00000024248	2218.65	-0.359803	0.779271	0.119189	-3.01875	0.0025382	0.0209996	Cox7a2l
ENSMUSG00000033538	151.936	2.13403	4.38942	0.752333	2.83655	0.00456033	0.0322737	Casp4		ENSMUSG00000029098	1352.61	-0.359663	0.779347	0.106005	-3.39289	0.000691597	0.00785251	Acox3
ENSMUSG00000034825	12.9015	2.1444	4.4211	0.694677	3.08691	0.00202249	0.0178592	Nrip3		ENSMUSG00000027447	9407.65	-0.359277	0.779555	0.099018	-3.6284	0.000285178	0.00404745	Cst3
ENSMUSG00000078920	622.288	2.14854	4.43379	0.672974	3.19261	0.00140995	0.0135044	Ifi47		ENSMUSG00000023939	1122.55	-0.356237	0.781199	0.125096	-2.8477	0.00440366	0.0315077	Mrpl14
ENSMUSG00000015314	12.3508	2.15026	4.43907	0.793233	2.71075	0.00671314	0.0427081	Slamf6		ENSMUSG00000028637	1360.13	-0.356213	0.781213	0.120055	-2.96708	0.00300639	0.0237049	Ccdc30
ENSMUSG00000043263	259.192	2.15597	4.4567	0.338773	6.36407	1.96481e-10	4.14778e-08	Ifi209		ENSMUSG00000042682	2188.82	-0.356034	0.781309	0.110922	-3.20978	0.00132837	0.0128971	Selenok
ENSMUSG00000028327	12.0787	2.16381	4.48096	0.752063	2.87716	0.00401271	0.0294253	Stra6l		ENSMUSG00000031950	803.857	-0.355806	0.781433	0.115047	-3.09271	0.00198338	0.0176035	Gabarapl2
ENSMUSG00000062488	1227.35	2.17008	4.5005	0.664305	3.2667	0.00108809	0.0110235	Ifit3b		ENSMUSG00000019998	5014.49	-0.355606	0.781542	0.124382	-2.85899	0.00424998	0.030647	Stx7
ENSMUSG00000029330	120.848	2.17307	4.50983	0.371747	5.84556	5.04857e-09	6.15767e-07	Cds1		ENSMUSG00000020153	1286.09	-0.355105	0.781813	0.106014	-3.3496	0.000809277	0.00879223	Ndufs7
ENSMUSG00000003882	11.3071	2.17812	4.52564	0.774518	2.81223	0.00491992	0.034023	Il7r		ENSMUSG00000054428	2350.56	-0.355072	0.781831	0.112762	-3.14887	0.00163905	0.0151953	Atpif1
ENSMUSG00000042388	23.1194	2.1805	4.53311	0.818365	2.66446	0.00771123	0.047285	Dlgap3		ENSMUSG00000035268	849.923	-0.355067	0.781834	0.0987391	-3.59601	0.000323136	0.00445654	Pkig
ENSMUSG00000031202	9.57404	2.19773	4.58758	0.796282	2.75999	0.00578024	0.0382216	Rab39b		ENSMUSG00000036775	579.316	-0.355059	0.781838	0.122089	-2.9082	0.00363514	0.0273767	Decr2
ENSMUSG00000038486	27.5888	2.2052	4.61139	0.707475	3.117	0.00182699	0.0165542	Sv2a		ENSMUSG00000023960	2101.19	-0.354285	0.782257	0.12737	-2.78153	0.00541035	0.0364708	Enpp5
ENSMUSG00000050014	28.5328	2.20561	4.61269	0.676526	3.2602	0.00111335	0.0112284	Apol10b		ENSMUSG00000051098	599.921	-0.353986	0.782419	0.114512	-3.09126	0.00199308	0.017678	Mblac2
ENSMUSG00000030156	18.2199	2.21224	4.63395	0.651305	3.39663	0.000682207	0.00777417	Cd69		ENSMUSG00000058546	6131.28	-0.353684	0.782583	0.0955587	-3.70122	0.000214562	0.00331657	Rpl23a
ENSMUSG00000067219	12.7374	2.22791	4.68454	0.736471	3.02511	0.00248539	0.0207054	Nipal1		ENSMUSG00000014294	2190.95	-0.353656	0.782598	0.110291	-3.20658	0.00134322	0.0129687	Ndufa2
ENSMUSG00000032690	125.016	2.2287	4.68711	0.384518	5.79609	6.78778e-09	7.96773e-07	Oas2		ENSMUSG00000062328	11098.3	-0.353581	0.782639	0.109083	-3.2414	0.00118943	0.0117976	Rpl17
ENSMUSG00000024679	422.558	2.25492	4.77308	0.262338	8.59547	8.29229e-18	2.58918e-14	Ms4a6d		ENSMUSG00000036667	2333.85	-0.353264	0.782811	0.114368	-3.08885	0.00200933	0.0177763	Tcaf1
ENSMUSG00000025877	69.9469	2.25733	4.78107	0.407951	5.53334	3.14194e-08	2.77129e-06	Hk3		ENSMUSG00000029263	604.022	-0.352755	0.783087	0.124642	-2.83014	0.00465274	0.0327496	Pigg
ENSMUSG00000000982	19.1038	2.25998	4.78986	0.757997	2.98152	0.00286821	0.0229046	Ccl3		ENSMUSG00000026860	1015.15	-0.352739	0.783096	0.114461	-3.08175	0.00205791	0.018084	Sh3glb2
ENSMUSG00000039899	448.707	2.2641	4.80354	0.465931	4.8593	1.17804e-06	5.3464e-05	Fgl2		ENSMUSG00000032898	2196.56	-0.352381	0.78329	0.0827691	-4.2574	2.07e-05	0.000537253	Fbxo21
ENSMUSG00000024401	18.961	2.27142	4.82798	0.695239	3.2671	0.00108654	0.011015	Tnf		ENSMUSG00000060636	4821.5	-0.351825	0.783592	0.119597	-2.94176	0.00326357	0.0252858	Rpl35a
ENSMUSG00000040536	26.3517	2.27301	4.83329	0.8517	2.66879	0.0076126	0.0468643	Necab1		ENSMUSG00000024570	1104.16	-0.351757	0.783629	0.104719	-3.35905	0.000782102	0.00857628	Rbfa
ENSMUSG00000012519	628.332	2.27552	4.84171	0.551807	4.12376	3.7274e-05	0.000876387	Mlkl		ENSMUSG00000024099	3856.56	-0.351669	0.783677	0.0998711	-3.52123	0.000429551	0.00548785	Ndufv2
ENSMUSG00000028859	56.1819	2.28584	4.87649	0.497981	4.59022	4.42786e-06	0.000157826	Csf3r		ENSMUSG00000013997	1441.05	-0.351661	0.783681	0.116273	-3.02444	0.00249091	0.020738	Nit1
ENSMUSG00000048636	58.288	2.29184	4.8968	0.49056	4.67189	2.98445e-06	0.000115903	A730049H05Rik		ENSMUSG00000026918	2387.1	-0.351605	0.783712	0.0952382	-3.69184	0.000222633	0.0034076	Brd3
ENSMUSG00000029322	437.712	2.32415	5.00772	0.567077	4.09848	4.15875e-05	0.000950605	Plac8		ENSMUSG00000020444	1097.69	-0.351431	0.783807	0.128617	-2.73238	0.00628785	0.0406652	Guk1
ENSMUSG00000048070	31.7217	2.32453	5.00903	0.842762	2.75823	0.00581152	0.0383796	Pirt		ENSMUSG00000068921	2335.13	-0.351117	0.783977	0.101977	-3.4431	0.00057509	0.00688521	Dap3
ENSMUSG00000024338	3088.31	2.33748	5.05419	0.412651	5.66454	1.4742e-08	1.47534e-06	Psmb8		ENSMUSG00000049265	51042.3	-0.350935	0.784076	0.132658	-2.64542	0.00815907	0.0491243	Kcnk3
ENSMUSG00000052613	27.0052	2.34093	5.0663	0.764145	3.06347	0.00218788	0.0189132	Pcdh15		ENSMUSG00000030695	22516.6	-0.350808	0.784145	0.103317	-3.39546	0.000685126	0.00779606	Aldoa
ENSMUSG00000044703	62.0736	2.34145	5.06811	0.400507	5.84621	5.02897e-09	6.15767e-07	Phf11a		ENSMUSG00000043991	1266.34	-0.350391	0.784372	0.114137	-3.06991	0.00214124	0.0186442	Pura
ENSMUSG00000023484	12.2982	2.34701	5.08769	0.879825	2.66759	0.00763976	0.046976	Prph		ENSMUSG00000024151	547.067	-0.350377	0.784379	0.131374	-2.66702	0.00765279	0.0470375	Msh2
ENSMUSG00000006403	46.3711	2.35298	5.10878	0.628881	3.74153	0.000182904	0.00292872	Adamts4		ENSMUSG00000021608	579.376	-0.350022	0.784572	0.126239	-2.77268	0.00555963	0.0372839	Lpcat1
ENSMUSG00000070498	27.2827	2.35395	5.11222	0.8625	2.72922	0.00634845	0.0409554	Tmem132b		ENSMUSG00000060152	1299.94	-0.349427	0.784896	0.104476	-3.34456	0.000824138	0.00889795	Pop5
ENSMUSG00000045322	42.5174	2.35693	5.1228	0.423509	5.56525	2.61784e-08	2.39004e-06	Tlr9		ENSMUSG00000020009	1034.17	-0.34918	0.78503	0.11115	-3.14153	0.00168069	0.0154985	Ifngr1
ENSMUSG00000005045	49.305	2.35754	5.12496	0.685347	3.43992	0.000581883	0.00693936	Chd5		ENSMUSG00000029550	1185.68	-0.349094	0.785077	0.110877	-3.14849	0.00164117	0.0151974	Sppl3
ENSMUSG00000026581	83.6976	2.36406	5.14816	0.477154	4.95449	7.25195e-07	3.69991e-05	Sell		ENSMUSG00000022354	3462.6	-0.348861	0.785204	0.104775	-3.32961	0.000869678	0.00926153	Ndufb9
ENSMUSG00000052749	17.7698	2.36626	5.15603	0.712797	3.31968	0.000901195	0.00953862	Trim30b		ENSMUSG00000050530	1202.25	-0.348759	0.785259	0.0975859	-3.57387	0.000351742	0.00472049	Fam171a1
ENSMUSG00000026536	103.721	2.36719	5.15935	0.368888	6.41709	1.38903e-10	3.14284e-08	Ifi211		ENSMUSG00000032122	2372.71	-0.347789	0.785787	0.109564	-3.17431	0.00150193	0.0142196	Slc37a2
ENSMUSG00000032596	758.95	2.37043	5.17097	0.412629	5.74471	9.20785e-09	1.01234e-06	Uba7		ENSMUSG00000032040	562.98	-0.346688	0.786387	0.117425	-2.95242	0.00315297	0.0245507	Dcps
ENSMUSG00000097194	35.0413	2.37271	5.17912	0.571547	4.15138	3.3048e-05	0.000793761	NA		ENSMUSG00000026932	1374.66	-0.346642	0.786412	0.102811	-3.37163	0.000747243	0.00832207	Nacc2
ENSMUSG00000015437	58.9897	2.37351	5.18202	0.511617	4.63924	3.49693e-06	0.000130819	Gzmb		ENSMUSG00000032422	1338.26	-0.3462	0.786653	0.107147	-3.23106	0.00123331	0.012147	Snx14
ENSMUSG00000025658	20.0891	2.38897	5.23783	0.879897	2.71506	0.00662647	0.0423166	Cnksr2		ENSMUSG00000031641	777.986	-0.345856	0.786841	0.11303	-3.05985	0.00221446	0.0190585	Cbr4
ENSMUSG00000039126	129.382	2.40805	5.30758	0.768445	3.13367	0.00172634	0.0158075	Prune2		ENSMUSG00000029007	3227.7	-0.345684	0.786935	0.0895499	-3.86024	0.000113277	0.00202111	Agtrap
ENSMUSG00000037202	13.835	2.41481	5.33248	0.808381	2.98721	0.00281532	0.0225333	Prf1		ENSMUSG00000024608	26316.9	-0.345476	0.787048	0.120814	-2.85956	0.00424223	0.0306278	Rps14
ENSMUSG00000032890	75.345	2.41904	5.34813	0.60618	3.99062	6.59003e-05	0.00134667	Rims3		ENSMUSG00000033209	903.831	-0.345338	0.787124	0.125168	-2.75899	0.00579799	0.0383206	Ttc28
ENSMUSG00000068327	23.8521	2.42579	5.37324	0.907409	2.67332	0.00751052	0.0463822	Tlx2		ENSMUSG00000020654	1002.1	-0.345323	0.787132	0.119211	-2.89674	0.00377065	0.0281528	Adcy3
ENSMUSG00000037035	174.841	2.43569	5.41025	0.311533	7.81842	5.34915e-15	7.5919e-12	Inhbb		ENSMUSG00000024357	1618.5	-0.345116	0.787245	0.110463	-3.12426	0.0017825	0.016236	Sil1
ENSMUSG00000033981	45.9043	2.43886	5.42211	0.741541	3.2889	0.00100578	0.0103645	Gria2		ENSMUSG00000000594	8867.81	-0.345084	0.787262	0.0838979	-4.11314	3.9e-05	0.000906775	Gm2a
ENSMUSG00000063193	19.9901	2.44502	5.44534	0.785	3.11468	0.00184145	0.0166563	Cd300lb		ENSMUSG00000033707	1180.61	-0.34503	0.787292	0.123329	-2.79764	0.00514773	0.0351098	C030006K11Rik
ENSMUSG00000045932	1172.33	2.44625	5.44998	0.609053	4.01649	5.90721e-05	0.00122638	Ifit2		ENSMUSG00000032381	1514.63	-0.344186	0.787752	0.0985362	-3.49299	0.000477647	0.00596629	Fam96a
ENSMUSG00000025279	147.839	2.45691	5.49039	0.366021	6.71249	1.91335e-11	6.63804e-09	Dnase1l3		ENSMUSG00000057322	2345.85	-0.343482	0.788137	0.10576	-3.24774	0.00116325	0.011603	Rpl38
ENSMUSG00000071068	12.2295	2.45913	5.49884	0.782315	3.1434	0.00166998	0.0154545	Treml2		ENSMUSG00000020340	4487.16	-0.343417	0.788172	0.121255	-2.83218	0.00462313	0.0325968	Cyfip2
ENSMUSG00000015829	23.348	2.46958	5.53884	0.890459	2.77338	0.00554766	0.0372676	Tnr		ENSMUSG00000049295	1254.29	-0.343295	0.788239	0.103906	-3.30391	0.000953462	0.0100104	Zfp219
ENSMUSG00000023341	244.266	2.47912	5.57558	0.689295	3.5966	0.000322398	0.00445028	Mx2		ENSMUSG00000072941	9330.95	-0.34319	0.788297	0.0943522	-3.63732	0.000275485	0.00395466	Sod3
ENSMUSG00000026073	11.2612	2.48276	5.58967	0.889433	2.7914	0.00524803	0.0356072	Il1r2		ENSMUSG00000030611	1972.52	-0.342777	0.788522	0.118713	-2.88743	0.00388397	0.0287786	Mrps11
ENSMUSG00000027368	60.4039	2.50361	5.67103	0.529237	4.73061	2.23851e-06	9.24541e-05	Dusp2		ENSMUSG00000020818	738.978	-0.342119	0.788882	0.106656	-3.2077	0.00133801	0.0129665	Mfsd11
ENSMUSG00000027555	120.089	2.50616	5.68106	0.412185	6.08018	1.20047e-09	1.93214e-07	Car13		ENSMUSG00000006378	523.493	-0.341901	0.789001	0.12847	-2.66134	0.00778311	0.0475272	Gcat
ENSMUSG00000070427	653.405	2.52064	5.73835	0.498846	5.05294	4.35059e-07	2.46987e-05	Il18bp		ENSMUSG00000001105	2106.58	-0.34173	0.789095	0.106714	-3.2023	0.00136337	0.0131388	Ift20
ENSMUSG00000032507	11.9007	2.58191	5.98732	0.923063	2.79711	0.00515617	0.0351345	Fbxl2		ENSMUSG00000022177	1120.43	-0.341347	0.789304	0.114272	-2.98715	0.00281594	0.0225333	Haus4
ENSMUSG00000058427	9.53796	2.58258	5.99012	0.930806	2.77457	0.00552753	0.0371484	Cxcl2		ENSMUSG00000071648	1230.04	-0.341124	0.789426	0.122317	-2.78885	0.00528956	0.0357957	Rom1
ENSMUSG00000018930	31.2774	2.58283	5.99112	0.60223	4.28877	1.79666e-05	0.000479477	Ccl4		ENSMUSG00000030990	1095.65	-0.340938	0.789528	0.103213	-3.30326	0.000955683	0.010027	Pgap2
ENSMUSG00000040276	13.0683	2.58478	5.99925	0.81296	3.17947	0.00147544	0.0140113	Pacsin1		ENSMUSG00000028565	2607.15	-0.339932	0.790079	0.107967	-3.14848	0.00164123	0.0151974	Nfia
ENSMUSG00000032776	42.5856	2.596	6.04608	0.606073	4.28331	1.84131e-05	0.000489719	Mctp2		ENSMUSG00000013698	1160.39	-0.339516	0.790307	0.103775	-3.27166	0.00106918	0.0108885	Pea15a
ENSMUSG00000029298	1087.64	2.60359	6.07797	0.557969	4.66619	3.0684e-06	0.000118868	Gbp9		ENSMUSG00000029776	3835.67	-0.339431	0.790353	0.0911813	-3.7226	0.000197183	0.00309701	Hibadh
ENSMUSG00000061576	19.5752	2.60662	6.09073	0.840921	3.09971	0.00193707	0.0172908	Dpp6		ENSMUSG00000074649	9987.58	-0.339348	0.790399	0.10933	-3.10389	0.00190992	0.0171169	BC029722
ENSMUSG00000027895	24.6917	2.61302	6.11783	0.969782	2.69444	0.00705068	0.044421	Kcnc4		ENSMUSG00000076432	3195.34	-0.339113	0.790527	0.109827	-3.08771	0.00201707	0.0178214	Ywhaq
ENSMUSG00000061578	22.7567	2.61448	6.12401	0.898354	2.9103	0.00361086	0.0272909	Ksr2		ENSMUSG00000054690	3352.75	-0.339087	0.790541	0.0795683	-4.26159	2.03e-05	0.000528761	Emcn
ENSMUSG00000079363	696.751	2.62095	6.15157	0.740112	3.5413	0.000398168	0.00518448	Gbp4		ENSMUSG00000038074	954.159	-0.339016	0.79058	0.11865	-2.85727	0.00427305	0.0307303	Fkbp14
ENSMUSG00000028037	3381.83	2.63498	6.21164	0.573796	4.59218	4.38643e-06	0.00015779	Ifi44		ENSMUSG00000038646	677.667	-0.338221	0.791016	0.116394	-2.90583	0.0036628	0.0275451	Fam103a1
ENSMUSG00000074896	3663.07	2.65669	6.30583	0.66831	3.97523	7.03111e-05	0.00141468	Ifit3		ENSMUSG00000050608	3415.95	-0.337792	0.791252	0.116334	-2.90364	0.00368858	0.0276856	Minos1
ENSMUSG00000033847	13.9164	2.66307	6.3338	0.831216	3.20383	0.00135615	0.0130854	Pla2g4c		ENSMUSG00000031157	1585.37	-0.337287	0.791528	0.107056	-3.15057	0.00162951	0.0151338	Pqbp1
ENSMUSG00000021303	51.0026	2.66867	6.35842	0.716699	3.72356	0.000196436	0.00308838	Gng4		ENSMUSG00000006373	15048.7	-0.337185	0.791584	0.109285	-3.08537	0.00203296	0.0179416	Pgrmc1
ENSMUSG00000029561	1760.31	2.66941	6.36171	0.588356	4.53707	5.70399e-06	0.000191507	Oasl2		ENSMUSG00000004892	2073.69	-0.336798	0.791797	0.112998	-2.98055	0.00287728	0.0229653	Bcan
ENSMUSG00000054072	2037.32	2.67166	6.37163	0.781693	3.41779	0.000631311	0.00736624	Iigp1		ENSMUSG00000032320	1573.98	-0.336566	0.791924	0.126677	-2.65688	0.00788664	0.0479464	Rcn2
ENSMUSG00000003206	49.5533	2.67531	6.38774	0.577281	4.63432	3.58111e-06	0.000132799	Ebi3		ENSMUSG00000079037	3153.63	-0.336458	0.791983	0.0800728	-4.2019	2.65e-05	0.000661146	Prnp
ENSMUSG00000029798	2715.23	2.69178	6.46109	0.351211	7.66428	1.79831e-14	2.00537e-11	Herc6		ENSMUSG00000004207	16821.1	-0.334153	0.79325	0.0939435	-3.55696	0.000375176	0.0049262	Psap
ENSMUSG00000032572	18.0049	2.69997	6.49789	0.655632	4.11812	3.81977e-05	0.000891394	Col6a4		ENSMUSG00000031819	1852.67	-0.334004	0.793332	0.11095	-3.01039	0.00260912	0.0213293	Emc8
ENSMUSG00000068099	53.5352	2.70138	6.50423	0.594569	4.54343	5.53473e-06	0.000187437	1500009C09Rik		ENSMUSG00000029119	1260.78	-0.333571	0.79357	0.101924	-3.27276	0.00106505	0.0108639	Man2b2
ENSMUSG00000090942	102.1	2.70541	6.52243	0.480323	5.63248	1.77635e-08	1.7225e-06	F830016B08Rik		ENSMUSG00000050212	541.487	-0.333503	0.793607	0.122787	-2.71611	0.0066054	0.0422464	Eva1b
ENSMUSG00000035373	24.3439	2.71328	6.55812	0.739095	3.67109	0.00024152	0.0036117	Ccl7		ENSMUSG00000038982	874.276	-0.333407	0.79366	0.116325	-2.86617	0.00415477	0.0301655	Bloc1s5
ENSMUSG00000082292	86.8514	2.7233	6.60383	0.54353	5.0104	5.43172e-07	2.91242e-05	NA		ENSMUSG00000041895	959.607	-0.333268	0.793737	0.109065	-3.05567	0.00224559	0.0192627	Wipi1
ENSMUSG00000002930	19.5106	2.75126	6.73306	0.876835	3.13772	0.00170268	0.0156182	Ppp1r17		ENSMUSG00000027378	890.809	-0.333051	0.793856	0.124102	-2.68368	0.0072816	0.0454176	Nphp1
ENSMUSG00000041481	175.005	2.75231	6.73796	0.737526	3.73182	0.000190104	0.00301004	NA		ENSMUSG00000030894	2764.14	-0.333002	0.793883	0.113499	-2.93397	0.00334654	0.0258006	Tpp1
ENSMUSG00000039236	628.217	2.76198	6.78327	0.724646	3.81149	0.000138131	0.00238288	Isg20		ENSMUSG00000015994	2788.91	-0.332725	0.794035	0.093526	-3.55757	0.000374299	0.0049214	Fnta
ENSMUSG00000027078	1414.99	2.76428	6.79408	0.519467	5.32137	1.02987e-07	7.30831e-06	Ube2l6		ENSMUSG00000036751	3753.94	-0.332583	0.794113	0.0971622	-3.42297	0.000619414	0.00726543	Cox6b1
ENSMUSG00000037855	24.2102	2.79607	6.94545	0.618804	4.5185	6.22791e-06	0.000205127	Zfp365		ENSMUSG00000037455	421.696	-0.332525	0.794146	0.125861	-2.642	0.0082418	0.0495269	Slc18b1
ENSMUSG00000040797	26.9193	2.81139	7.01959	0.835407	3.36529	0.000764636	0.00844232	Iqsec3		ENSMUSG00000107002	787.749	-0.332323	0.794257	0.104922	-3.16734	0.00153838	0.0145031	0610012G03Rik
ENSMUSG00000026580	10.1378	2.87482	7.33514	1.02939	2.79274	0.00522629	0.0354752	Selp		ENSMUSG00000001946	1053.19	-0.331296	0.794822	0.100531	-3.29546	0.000982598	0.0102195	Esam
ENSMUSG00000029380	47.1376	2.88009	7.36196	0.622578	4.62607	3.72665e-06	0.000137218	Cxcl1		ENSMUSG00000042198	486.816	-0.331135	0.794911	0.123259	-2.68649	0.00722064	0.0451276	Chchd7
ENSMUSG00000111078	12.7959	2.89887	7.4584	0.814603	3.55863	0.000372801	0.00490936	NA		ENSMUSG00000040331	1985.75	-0.329729	0.795686	0.102162	-3.22751	0.00124874	0.0122304	Nsmce4a
ENSMUSG00000068129	7.36434	2.91886	7.56247	1.09547	2.66447	0.00771086	0.047285	Cst7		ENSMUSG00000031347	1402.57	-0.329362	0.795888	0.112629	-2.92431	0.00345219	0.0264065	Cetn2
ENSMUSG00000105504	412.702	2.93084	7.62552	0.779252	3.76109	0.000169176	0.00275123	Gbp5		ENSMUSG00000061046	713.32	-0.328881	0.796154	0.123839	-2.65572	0.00791388	0.0480558	Haghl
ENSMUSG00000020676	15.6927	2.96312	7.7981	1.04452	2.83684	0.00455626	0.0322596	Ccl11		ENSMUSG00000040462	2969.61	-0.328695	0.796257	0.121664	-2.70166	0.00689943	0.0436089	Os9
ENSMUSG00000053519	11.8128	2.97222	7.84745	0.978273	3.03823	0.00237969	0.0201203	Kcnip1		ENSMUSG00000038274	3430.73	-0.328117	0.796576	0.121868	-2.6924	0.00709407	0.0445745	Fau
ENSMUSG00000041827	277.684	2.98393	7.91138	0.568526	5.24854	1.53313e-07	1.02389e-05	Oasl1		ENSMUSG00000089715	2801.3	-0.328054	0.79661	0.0939244	-3.49275	0.000478083	0.00596629	Cbx6
ENSMUSG00000046908	7.50839	2.98417	7.91268	1.08727	2.74465	0.00605752	0.0395194	Ltb4r1		ENSMUSG00000031807	1512.92	-0.328042	0.796617	0.0886672	-3.69969	0.00021586	0.00333051	Pgls
ENSMUSG00000029878	18.1625	2.99213	7.95648	1.00685	2.97178	0.0029608	0.0234998	NA		ENSMUSG00000052428	4402.9	-0.327166	0.797101	0.10512	-3.11231	0.0018563	0.0167552	Tmco1
ENSMUSG00000052776	701.648	3.03519	8.19754	0.683977	4.43756	9.09836e-06	0.000274431	Oas1a		ENSMUSG00000071655	3451.36	-0.327025	0.797178	0.0953345	-3.43029	0.000602928	0.00712021	Ubxn1
ENSMUSG00000078763	74.943	3.053	8.29937	0.422965	7.2181	5.27198e-13	3.42943e-10	Slfn1		ENSMUSG00000004558	4982.51	-0.326837	0.797282	0.111839	-2.92239	0.00347358	0.0265441	Ndrg2
ENSMUSG00000040328	92.1978	3.08163	8.46571	0.551298	5.58977	2.27372e-08	2.10043e-06	Olfr56		ENSMUSG00000039001	8074.29	-0.326791	0.797308	0.114941	-2.84313	0.00446734	0.0318321	Rps21
ENSMUSG00000031779	37.4797	3.13365	8.77651	0.610519	5.13276	2.85525e-07	1.71447e-05	Ccl22		ENSMUSG00000024646	2418.64	-0.32674	0.797336	0.0897906	-3.63891	0.000273792	0.00393595	Cyb5a
ENSMUSG00000022548	37.3492	3.14053	8.81851	0.731409	4.29382	1.75629e-05	0.00047438	Apod		ENSMUSG00000022890	4840.01	-0.326705	0.797356	0.102201	-3.1967	0.0013901	0.0133552	Atp5j
ENSMUSG00000024675	512.605	3.16733	8.98385	0.506382	6.25483	3.97959e-10	7.57674e-08	Ms4a4c		ENSMUSG00000032288	1506.73	-0.326702	0.797357	0.113153	-2.88725	0.00388629	0.0287822	Imp3
ENSMUSG00000021647	15.9424	3.26377	9.60488	0.97559	3.34543	0.000821557	0.00888853	Cartpt		ENSMUSG00000040713	1146.34	-0.32651	0.797464	0.112942	-2.89094	0.00384094	0.0285509	Creg1
ENSMUSG00000028965	23.6361	3.27428	9.67514	0.831681	3.93694	8.25259e-05	0.00159652	Tnfrsf9		ENSMUSG00000024012	3141.79	-0.325995	0.797748	0.0932698	-3.49518	0.000473743	0.00593109	Mtch1
ENSMUSG00000037868	28.136	3.33197	10.0699	0.571498	5.83024	5.53464e-09	6.64667e-07	Egr2		ENSMUSG00000032047	3575.84	-0.325948	0.797774	0.102516	-3.1795	0.00147532	0.0140113	Acat1
ENSMUSG00000066861	151.508	3.34426	10.156	0.44864	7.45421	9.04107e-14	8.82182e-11	Oas1g		ENSMUSG00000006127	1103.45	-0.325415	0.798069	0.108344	-3.00355	0.00266848	0.0216418	Inpp5k
ENSMUSG00000020007	11.351	3.35953	10.264	1.10803	3.03197	0.00242962	0.0203931	Il20ra		ENSMUSG00000033940	4138.42	-0.325266	0.798151	0.108598	-2.99514	0.00274321	0.02211	Brk1
ENSMUSG00000028268	5493.63	3.43362	10.805	0.546119	6.28732	3.22995e-10	6.46487e-08	Gbp3		ENSMUSG00000031158	1423.6	-0.324824	0.798396	0.110561	-2.93796	0.00330377	0.0255086	Timm17b
ENSMUSG00000034855	263.02	3.47982	11.1565	1.04439	3.33191	0.000862523	0.00921702	Cxcl10		ENSMUSG00000042831	727.865	-0.324787	0.798416	0.114899	-2.82671	0.00470292	0.0329986	Alkbh6
ENSMUSG00000079186	12.7064	3.48905	11.2282	0.963038	3.62296	0.000291249	0.00410377	Gzmc		ENSMUSG00000071014	1930.98	-0.323883	0.798917	0.111963	-2.89276	0.00381871	0.0284571	Ndufb6
ENSMUSG00000104713	503.433	3.50154	11.3258	0.711505	4.92132	8.59625e-07	4.17899e-05	Gbp6		ENSMUSG00000039105	2300.57	-0.323535	0.799109	0.113668	-2.84631	0.00442295	0.0316023	Atp6v1g1
ENSMUSG00000063388	109.922	3.53493	11.5909	0.965683	3.66055	0.000251678	0.00371833	NA		ENSMUSG00000029763	1281	-0.323514	0.799121	0.121716	-2.65795	0.00786179	0.0478325	Exoc4
ENSMUSG00000027514	753.997	3.56559	11.8399	0.615897	5.78927	7.06946e-09	8.23645e-07	Zbp1		ENSMUSG00000028223	2671.65	-0.322756	0.799541	0.112318	-2.87359	0.0040584	0.0296489	Decr1
ENSMUSG00000078783	6.4408	3.56813	11.8608	1.26329	2.82448	0.00473573	0.0331395	Gm9733		ENSMUSG00000039007	2390.55	-0.322708	0.799567	0.0884507	-3.64845	0.000263823	0.00383496	Cpq
ENSMUSG00000025498	7736.41	3.57398	11.909	0.820727	4.35465	1.33281e-05	0.000373569	Irf7		ENSMUSG00000066621	3557.16	-0.322298	0.799795	0.0902112	-3.57271	0.00035331	0.0047306	Tecpr1
ENSMUSG00000028874	43.1162	3.61733	12.2723	0.612697	5.90395	3.54899e-09	4.73563e-07	Fgr		ENSMUSG00000005881	3911.16	-0.321201	0.800403	0.109194	-2.94155	0.00326569	0.0252897	Ergic3
ENSMUSG00000027966	6.84887	3.61906	12.287	1.19082	3.03913	0.00237265	0.0200877	Col11a1		ENSMUSG00000032182	894.626	-0.32053	0.800775	0.101532	-3.15695	0.00159431	0.0149452	Yipf2
ENSMUSG00000053846	44.8449	3.64356	12.4975	0.707297	5.15139	2.58565e-07	1.59554e-05	Lipg		ENSMUSG00000068290	3377.09	-0.319082	0.80158	0.101214	-3.15254	0.00161858	0.0150986	Ddrgk1
ENSMUSG00000108814	12.0033	3.71522	13.1339	1.01601	3.65669	0.000255495	0.00375758	NA		ENSMUSG00000015790	1434.82	-0.318915	0.801673	0.1155	-2.76116	0.00575958	0.0381657	Surf1
ENSMUSG00000035273	17.0604	3.71852	13.1639	0.840112	4.42622	9.58999e-06	0.000283559	Hpse		ENSMUSG00000030967	2001.82	-0.318491	0.801908	0.110202	-2.89008	0.00385147	0.0285921	Zranb1
ENSMUSG00000030142	15.0274	3.77307	13.6712	0.97999	3.85011	0.000118065	0.00209885	Clec4e		ENSMUSG00000026374	3044.54	-0.318197	0.802071	0.0999664	-3.18304	0.00145737	0.0138904	Tsn
ENSMUSG00000035692	4667.67	3.77947	13.732	0.704173	5.36724	7.99512e-08	5.86008e-06	Isg15		ENSMUSG00000028673	1673.19	-0.318089	0.802132	0.10343	-3.07539	0.00210225	0.018422	Fuca1
ENSMUSG00000032661	200.459	3.8086	14.012	0.647793	5.87934	4.11903e-09	5.35885e-07	Oas3		ENSMUSG00000055839	2476.46	-0.318062	0.802147	0.112109	-2.83708	0.00455288	0.0322596	Elob
ENSMUSG00000039109	53.9386	3.8541	14.4611	0.671913	5.73602	9.69276e-09	1.05045e-06	F13a1		ENSMUSG00000023973	1355.9	-0.318025	0.802167	0.107082	-2.96991	0.00297887	0.0235712	Cnpy3
ENSMUSG00000021614	62.7484	3.85597	14.4798	1.1956	3.22512	0.0012592	0.0123252	Vcan		ENSMUSG00000003534	1376.34	-0.317971	0.802197	0.0958873	-3.31609	0.000912852	0.00964239	Ddr1
ENSMUSG00000007682	8.27087	3.87774	14.7	1.26805	3.05804	0.0022279	0.0191426	Dio2		ENSMUSG00000096210	6197.07	-0.317953	0.802207	0.0828307	-3.83859	0.000123743	0.00217798	H1f0
ENSMUSG00000013974	8.35537	3.92126	15.1501	1.28697	3.04688	0.00231231	0.0196836	Mcemp1		ENSMUSG00000033917	3633.44	-0.317078	0.802694	0.104633	-3.03037	0.00244255	0.0204248	Gde1
ENSMUSG00000020701	8.30502	3.93212	15.2647	1.26003	3.12065	0.00180451	0.0163886	Tmem132e		ENSMUSG00000059734	3492.77	-0.316616	0.802951	0.102092	-3.10129	0.00192682	0.0172387	Ndufs8
ENSMUSG00000044309	13.981	3.93285	15.2723	1.147	3.42881	0.000606225	0.00714832	Apol7c		ENSMUSG00000024454	1481.07	-0.316507	0.803012	0.0914597	-3.46062	0.000538935	0.00652237	Hdac3
ENSMUSG00000028883	8.62664	3.96338	15.599	1.12567	3.5209	0.000430079	0.00548971	Sema3a		ENSMUSG00000058076	4139.49	-0.316502	0.803015	0.085369	-3.70746	0.000209351	0.00324566	Sdhc
ENSMUSG00000017002	40.9937	3.99076	15.8979	0.770398	5.18013	2.21732e-07	1.40718e-05	Slpi		ENSMUSG00000035885	3837.7	-0.316499	0.803016	0.104999	-3.01431	0.00257568	0.0211862	Cox8a
ENSMUSG00000029193	8.96179	4.00319	16.0355	1.29051	3.10204	0.00192195	0.0172148	Cckar		ENSMUSG00000045316	674.438	-0.316419	0.803061	0.107318	-2.94842	0.00319398	0.0247712	Fahd1
ENSMUSG00000044162	17.6188	4.02625	16.2938	0.92551	4.35031	1.35947e-05	0.000379678	Tnip3		ENSMUSG00000037348	2167.25	-0.315814	0.803397	0.0845308	-3.73609	0.000186907	0.00297451	Paqr7
ENSMUSG00000000386	210.965	4.08127	16.9272	0.825378	4.94473	7.62505e-07	3.84008e-05	Mx1		ENSMUSG00000056938	986.646	-0.315695	0.803464	0.106062	-2.97653	0.00291535	0.0232217	Acbd4
ENSMUSG00000111118	12.5732	4.10611	17.2212	1.02091	4.022	5.7706e-05	0.00120442	NA		ENSMUSG00000019054	2745.73	-0.315522	0.80356	0.0937278	-3.36636	0.000761661	0.00844232	Fis1
ENSMUSG00000050370	112.946	4.19265	18.2858	0.543103	7.71981	1.16507e-14	1.51575e-11	Ch25h		ENSMUSG00000018585	1378.89	-0.315011	0.803845	0.118786	-2.65191	0.00800381	0.0483949	Atox1
ENSMUSG00000029417	284.423	4.20615	18.4577	1.10911	3.79237	0.000149215	0.00252388	Cxcl9		ENSMUSG00000021222	1082.85	-0.314804	0.80396	0.104374	-3.01611	0.00256043	0.0211053	Dcaf4
ENSMUSG00000038357	6.70251	4.23625	18.8468	1.30674	3.24184	0.00118761	0.011787	Camp		ENSMUSG00000021823	3495.89	-0.314463	0.80415	0.0866742	-3.62811	0.000285504	0.0040484	Vcl
ENSMUSG00000074677	6.79906	4.24255	18.9294	1.30415	3.25312	0.00114146	0.0114381	LOC100038947		ENSMUSG00000023175	9883.4	-0.314257	0.804265	0.0835266	-3.76236	0.000168318	0.00274438	Bsg
ENSMUSG00000059108	13.7673	4.26252	19.1932	1.04958	4.06118	4.88258e-05	0.0010706	Ifitm6		ENSMUSG00000006057	1336.9	-0.314018	0.804398	0.100076	-3.1378	0.00170222	0.0156182	Atp5g1
ENSMUSG00000066363	80.7296	4.30317	19.7416	1.26689	3.39664	0.000682182	0.00777417	Serpina3f		ENSMUSG00000040746	2042.2	-0.313818	0.80451	0.0882819	-3.55473	0.000378369	0.00496394	Rnf167
ENSMUSG00000024912	7.15841	4.30539	19.7721	1.30504	3.29905	0.000970113	0.0101239	Fosl1		ENSMUSG00000060938	6109.49	-0.313302	0.804798	0.092924	-3.37159	0.000747344	0.00832207	Rpl26
ENSMUSG00000036067	22.1859	4.34171	20.2762	0.885276	4.90436	9.37313e-07	4.48875e-05	Slc2a6		ENSMUSG00000000340	2574.51	-0.313129	0.804894	0.111889	-2.79857	0.00513292	0.0350854	Dbt
ENSMUSG00000021091	94.0644	4.39339	21.0156	1.48648	2.95557	0.00312097	0.0244233	Serpina3n		ENSMUSG00000019804	3696.58	-0.312581	0.8052	0.0849946	-3.67765	0.000235389	0.00356095	Snx3
ENSMUSG00000027797	37.3062	4.54015	23.266	0.613867	7.39599	1.40358e-13	1.28898e-10	Dclk1		ENSMUSG00000025204	1768.32	-0.312569	0.805207	0.0943818	-3.31175	0.000927142	0.0097669	Ndufb8
ENSMUSG00000056054	146.449	4.56098	23.6044	0.803334	5.67756	1.36626e-08	1.37614e-06	S100a8		ENSMUSG00000027997	1156.73	-0.312542	0.805222	0.0939697	-3.32598	0.000881068	0.00937005	Casp6
ENSMUSG00000045551	8.43149	4.56733	23.7085	1.49113	3.063	0.00219132	0.0189324	Fpr1		ENSMUSG00000015092	2677.86	-0.312502	0.805244	0.103826	-3.00984	0.00261382	0.0213476	Edf1
ENSMUSG00000026180	21.2636	4.58832	24.0559	0.98515	4.65748	3.20101e-06	0.000122787	Cxcr2		ENSMUSG00000037161	41960.9	-0.312171	0.805429	0.082219	-3.79682	0.000146564	0.00248713	Mgarp
ENSMUSG00000022584	66.0975	4.60913	24.4054	0.70546	6.53351	6.42473e-11	1.67172e-08	Ly6c2		ENSMUSG00000091337	4901.52	-0.311948	0.805553	0.104237	-2.99268	0.00276539	0.0222542	Eid1
ENSMUSG00000028270	10466.9	4.79154	27.6947	0.70359	6.81013	9.75112e-12	3.54034e-09	Gbp2		ENSMUSG00000032667	2397.1	-0.311907	0.805576	0.104264	-2.99151	0.00277597	0.0223049	Pon2
ENSMUSG00000022651	9.92301	4.82278	28.301	1.29991	3.71008	0.00020719	0.00322497	Retnlg		ENSMUSG00000032383	4753.19	-0.311812	0.805629	0.0911433	-3.42112	0.000623638	0.00729306	Ppib
ENSMUSG00000025746	10.0277	4.87049	29.2526	1.61841	3.00944	0.00261731	0.0213599	Il6		ENSMUSG00000062981	943.779	-0.310827	0.80618	0.103694	-2.99754	0.00272171	0.0219707	Mrpl42
ENSMUSG00000056071	209.361	4.91738	30.219	0.857007	5.73786	9.58831e-09	1.0468e-06	S100a9		ENSMUSG00000002379	1397.4	-0.310205	0.806527	0.0990721	-3.1311	0.00174151	0.0159277	Ndufa11
ENSMUSG00000054203	95.6104	4.97928	31.5437	0.604284	8.23998	1.72245e-16	3.84156e-13	Ifi205		ENSMUSG00000023572	1212.01	-0.309549	0.806894	0.0998546	-3.1	0.00193519	0.0172839	Ccndbp1
ENSMUSG00000019772	6.65066	5.1441	35.3613	1.80072	2.85669	0.00428082	0.0307699	Vip		ENSMUSG00000031996	13368.6	-0.309168	0.807107	0.11395	-2.71319	0.00666394	0.0424816	Aplp2
ENSMUSG00000052270	37.6457	5.16185	35.799	0.750457	6.87827	6.05831e-12	2.48901e-09	Fpr2		ENSMUSG00000024958	801.786	-0.309149	0.807118	0.11481	-2.69269	0.00708777	0.0445647	Gpr137
ENSMUSG00000035385	200.093	5.18472	36.3712	1.18632	4.37044	1.23998e-05	0.000352281	Ccl2		ENSMUSG00000037822	4371.4	-0.308937	0.807236	0.114258	-2.70387	0.00685375	0.0433858	Smim14
ENSMUSG00000022534	7.42099	5.3021	39.454	1.51313	3.50407	0.000458206	0.00576432	Mefv		ENSMUSG00000061518	2102.62	-0.308913	0.80725	0.107201	-2.88162	0.0039563	0.0291623	Cox5b
ENSMUSG00000068606	158.593	5.42375	42.9251	1.28608	4.21728	2.47272e-05	0.000623402	Gm4841		ENSMUSG00000025764	2053.46	-0.308408	0.807532	0.0990938	-3.11228	0.00185647	0.0167552	Jade1
ENSMUSG00000035042	751.531	5.43536	43.272	0.708607	7.67048	1.71349e-14	2.00537e-11	Ccl5		ENSMUSG00000055762	3305.08	-0.307662	0.80795	0.0919625	-3.34552	0.000821277	0.00888853	Eef1d
ENSMUSG00000063626	8.31377	5.47475	44.4696	1.49402	3.66445	0.000247874	0.00368202	Unc5d		ENSMUSG00000014313	5000.44	-0.307378	0.808109	0.114809	-2.6773	0.00742192	0.0460719	Cox6c
ENSMUSG00000040809	52.2073	5.65508	50.3905	0.770647	7.33809	2.16659e-13	1.78025e-10	Chil3		ENSMUSG00000036241	3749.15	-0.306774	0.808448	0.0758567	-4.04412	5.25e-05	0.00112589	Ube2r2
ENSMUSG00000005800	11.487	5.9435	61.5419	1.5135	3.927	8.60117e-05	0.00164965	Mmp8		ENSMUSG00000024953	3052.8	-0.306505	0.808598	0.0835321	-3.6693	0.000243211	0.0036231	Prdx5
ENSMUSG00000105096	23.0076	6.08275	67.778	1.36304	4.46263	8.09602e-06	0.00025141	Gbp10		ENSMUSG00000063015	3426.13	-0.305123	0.809373	0.0861791	-3.54056	0.000399273	0.00519021	Ccni
ENSMUSG00000031444	13.8251	6.21766	74.4221	1.45243	4.28086	1.86176e-05	0.000494317	F10		ENSMUSG00000064351	347543	-0.305075	0.8094	0.0984697	-3.09816	0.00194725	0.0173518	COX1
ENSMUSG00000030162	8.39619	6.47747	89.1069	1.56706	4.13353	3.57239e-05	0.000847601	Olr1		ENSMUSG00000005078	1817.49	-0.304794	0.809558	0.105628	-2.88555	0.0039073	0.0289241	Jkamp
ENSMUSG00000005640	9.18353	6.61086	97.7387	1.50634	4.38868	1.14043e-05	0.000327287	Insrr		ENSMUSG00000034793	2371.29	-0.30394	0.810037	0.106351	-2.8579	0.00426459	0.030724	G6pc3
ENSMUSG00000026822	356.053	6.76342	108.641	1.28868	5.24835	1.53465e-07	1.02389e-05	Lcn2		ENSMUSG00000000881	2149.03	-0.303543	0.81026	0.0939728	-3.23011	0.00123742	0.012147	Dlg3
ENSMUSG00000033730	12.7727	7.08241	135.525	1.39896	5.06262	4.13535e-07	2.37357e-05	Egr3		ENSMUSG00000065990	1963.1	-0.303273	0.810412	0.100372	-3.02149	0.00251538	0.0208674	Aurkaip1
ENSMUSG00000029371	27.6519	7.22565	149.671	2.2801	3.169	0.00152963	0.0144381	Cxcl5		ENSMUSG00000022681	668.619	-0.302538	0.810825	0.112514	-2.68889	0.00716894	0.0449123	Ntan1
ENSMUSG00000074115	16.0917	7.41578	170.754	2.2511	3.29429	0.00098669	0.0102463	Saa1		ENSMUSG00000037089	1604.4	-0.301567	0.81137	0.093191	-3.23601	0.00121211	0.0119883	Slc35b2
ENSMUSG00000033213	17.0975	7.50297	181.392	1.49975	5.0028	5.65025e-07	2.99594e-05	AA467197		ENSMUSG00000009927	4652.39	-0.300778	0.811814	0.112921	-2.66363	0.00773034	0.0473093	Rps25
ENSMUSG00000022126	54.5834	8.21203	296.529	1.81638	4.5211	6.15187e-06	0.000203051	Acod1		ENSMUSG00000025940	2873.04	-0.300369	0.812045	0.10107	-2.97189	0.0029597	0.0234998	Tmem70
ENSMUSG00000000204	73.7043	8.64661	400.763	1.83103	4.72228	2.3322e-06	9.53149e-05	Slfn4		ENSMUSG00000020483	8322.12	-0.299801	0.812364	0.0899774	-3.33196	0.000862373	0.00921702	Dynll2
ENSMUSG00000026981	200.404	9.19319	585.364	1.55777	5.9015	3.60218e-09	4.76587e-07	Il1rn		ENSMUSG00000018882	1018.79	-0.299594	0.812481	0.0988059	-3.03215	0.00242817	0.020392	Mrpl45
ENSMUSG00000040026	305.507	11.6629	3242.42	1.86879	6.24086	4.35166e-10	8.08787e-08	Saa3		ENSMUSG00000033965	2119.23	-0.299204	0.812701	0.0981158	-3.0495	0.00229225	0.0195342	Slc16a2
										ENSMUSG00000001445	3008.98	-0.298285	0.813219	0.0926976	-3.21783	0.00129167	0.0125877	Mrpl10
										ENSMUSG00000001018	2294.4	-0.298284	0.813219	0.109372	-2.72724	0.00638661	0.0410489	Snapin
										ENSMUSG00000019975	1433.26	-0.298083	0.813333	0.104618	-2.84926	0.00438211	0.031368	Ikbip
										ENSMUSG00000019370	5456.86	-0.297514	0.813653	0.0828961	-3.589	0.000331945	0.0045459	Calm3
										ENSMUSG00000084786	2819.21	-0.297485	0.813669	0.100882	-2.94884	0.00318967	0.0247501	Ubl5
										ENSMUSG00000018567	6586.71	-0.297385	0.813726	0.0854262	-3.4812	0.000499176	0.00614116	Gabarap
										ENSMUSG00000020629	1766.57	-0.297062	0.813908	0.0988808	-3.00424	0.00266244	0.021604	Adi1
										ENSMUSG00000028657	3270.94	-0.296567	0.814188	0.10511	-2.82148	0.00478023	0.0333189	Ppt1
										ENSMUSG00000024319	1143.39	-0.296512	0.814218	0.106934	-2.77285	0.00555672	0.0372839	Vps52
										ENSMUSG00000032249	3892.92	-0.296268	0.814356	0.093703	-3.16177	0.00156811	0.0147567	Anp32a
										ENSMUSG00000058267	1603.07	-0.296091	0.814456	0.10653	-2.77941	0.00544582	0.0366782	Mrps14
										ENSMUSG00000022507	1506.54	-0.295415	0.814838	0.0994208	-2.97136	0.00296481	0.0235135	1810013L24Rik
										ENSMUSG00000050148	1764.35	-0.29428	0.815479	0.103476	-2.84394	0.00445601	0.0317658	Ubqln2
										ENSMUSG00000025724	1671.72	-0.293787	0.815758	0.103923	-2.82698	0.00469893	0.0329855	Sec11a
										ENSMUSG00000063576	999.178	-0.293047	0.816176	0.0989008	-2.96304	0.00304612	0.0239572	Klhdc3
										ENSMUSG00000027011	1519.89	-0.292416	0.816534	0.105113	-2.78191	0.00540398	0.0364436	Ube2e3
										ENSMUSG00000027884	947.788	-0.292105	0.816709	0.101852	-2.86793	0.00413164	0.0300434	Clcc1
										ENSMUSG00000073155	1799.59	-0.292007	0.816765	0.0971127	-3.00689	0.00263936	0.0214725	1810058I24Rik
										ENSMUSG00000034108	3468.53	-0.291574	0.81701	0.090548	-3.2201	0.00128146	0.0124961	Ccs
										ENSMUSG00000032741	712.716	-0.291429	0.817092	0.109856	-2.65283	0.00798196	0.0483517	Tpcn1
										ENSMUSG00000055720	1027.39	-0.291153	0.817249	0.102715	-2.83458	0.00458861	0.0323863	Ubl7
										ENSMUSG00000026003	7038.02	-0.290754	0.817475	0.106288	-2.73554	0.00622786	0.0403944	Acadl
										ENSMUSG00000024870	3870.1	-0.290134	0.817826	0.0918276	-3.15955	0.00158014	0.014843	Rab1b
										ENSMUSG00000029759	1008.54	-0.289818	0.818005	0.104575	-2.77138	0.00558188	0.0373529	Pon3
										ENSMUSG00000027673	3098.66	-0.289782	0.818025	0.101585	-2.8526	0.00433637	0.0310976	Ndufb5
										ENSMUSG00000025374	1043.69	-0.289445	0.818217	0.104667	-2.76539	0.00568556	0.0377897	Nabp2
										ENSMUSG00000021290	2198.17	-0.288081	0.818991	0.101972	-2.82509	0.0047267	0.0331063	2010107E04Rik
										ENSMUSG00000031903	762.8	-0.287872	0.81911	0.108652	-2.64949	0.00806133	0.0486861	Pla2g15
										ENSMUSG00000053477	5999.28	-0.287072	0.819564	0.101365	-2.83207	0.00462476	0.0325968	Tcf4
										ENSMUSG00000029713	6017.14	-0.286729	0.819759	0.071394	-4.01615	5.92e-05	0.00122651	Gnb2
										ENSMUSG00000028669	1064.04	-0.286297	0.820004	0.100061	-2.86122	0.00422019	0.0305167	Pithd1
										ENSMUSG00000036427	2940.7	-0.28585	0.820258	0.094974	-3.00977	0.00261444	0.0213476	Gpi1
										ENSMUSG00000033350	1727.75	-0.285803	0.820285	0.101296	-2.82146	0.00478058	0.0333189	Chst2
										ENSMUSG00000063882	3959.3	-0.284817	0.820846	0.105117	-2.70952	0.00673808	0.0428318	Uqcrh
										ENSMUSG00000014551	939.771	-0.284671	0.820929	0.102706	-2.7717	0.00557642	0.0373404	Mrps25
										ENSMUSG00000042202	1606.57	-0.284551	0.820997	0.0927412	-3.06822	0.00215336	0.0186976	Slc35e2
										ENSMUSG00000035413	1134.05	-0.284472	0.821042	0.103846	-2.73936	0.00615595	0.0400277	Tmem98
										ENSMUSG00000001441	2561.66	-0.284392	0.821088	0.0799136	-3.55874	0.000372632	0.00490936	Npepps
										ENSMUSG00000021460	2448.8	-0.284246	0.821171	0.103244	-2.75315	0.00590252	0.0387511	Auh
										ENSMUSG00000024909	1998.37	-0.284103	0.821252	0.0956689	-2.96965	0.00298143	0.0235795	Efemp2
										ENSMUSG00000021716	861.521	-0.283669	0.821499	0.0988013	-2.87111	0.00409038	0.0298267	Srek1ip1
										ENSMUSG00000041841	5198	-0.281645	0.822652	0.100823	-2.79347	0.00521463	0.0354422	Rpl37
										ENSMUSG00000027244	2271.62	-0.281209	0.822901	0.0991252	-2.8369	0.00455534	0.0322596	Atg13
										ENSMUSG00000004771	3538.81	-0.281098	0.822965	0.105115	-2.6742	0.00749078	0.0462985	Rab11a
										ENSMUSG00000057363	2520.12	-0.28076	0.823157	0.104494	-2.68686	0.00721269	0.0450959	Uxs1
										ENSMUSG00000036955	1152.42	-0.280703	0.82319	0.101315	-2.77061	0.00559522	0.0374101	Kif1bp
										ENSMUSG00000003344	1558.98	-0.280519	0.823295	0.0863659	-3.24803	0.00116205	0.0115997	Btbd2
										ENSMUSG00000028293	1366.92	-0.280382	0.823373	0.0953027	-2.94201	0.00326088	0.0252775	Slc35a1
										ENSMUSG00000024516	924.356	-0.27998	0.823602	0.09711	-2.88312	0.00393752	0.0290809	Sec11c
										ENSMUSG00000037287	2962.52	-0.279809	0.8237	0.100364	-2.78794	0.00530436	0.0358803	Tbcel
										ENSMUSG00000024112	2743.23	-0.277365	0.825096	0.0823755	-3.36709	0.000759669	0.00844125	Cacna1h
										ENSMUSG00000008575	6708.35	-0.277159	0.825214	0.0790849	-3.50458	0.000457335	0.005758	Nfib
										ENSMUSG00000035596	958.367	-0.276796	0.825422	0.10479	-2.64143	0.00825575	0.0495535	Mboat7
										ENSMUSG00000028567	1406.94	-0.276452	0.825619	0.0964686	-2.86572	0.00416062	0.0301698	Txndc12
										ENSMUSG00000038462	4534.02	-0.275876	0.825949	0.0786327	-3.50842	0.000450783	0.00570801	Uqcrfs1
										ENSMUSG00000025781	5606.3	-0.275752	0.82602	0.104539	-2.63779	0.00834471	0.0499722	Atp5c1
										ENSMUSG00000035199	2743.04	-0.275298	0.826279	0.094794	-2.90418	0.0036822	0.0276643	Arl6ip5
										ENSMUSG00000052456	1255.82	-0.273233	0.827463	0.100643	-2.71487	0.00663013	0.0423179	Asna1
										ENSMUSG00000045039	1639.05	-0.273123	0.827527	0.095001	-2.87495	0.00404097	0.0295631	Megf8
										ENSMUSG00000026814	2177.22	-0.273103	0.827538	0.0815762	-3.34783	0.000814466	0.00882707	Eng
										ENSMUSG00000052146	4640.23	-0.272901	0.827654	0.102747	-2.65606	0.00790604	0.0480269	Rps10
										ENSMUSG00000071415	9625.9	-0.272564	0.827847	0.096895	-2.81298	0.0049085	0.033998	Rpl23
										ENSMUSG00000030357	4740.78	-0.272465	0.827904	0.0930906	-2.92688	0.00342381	0.0262537	Fkbp4
										ENSMUSG00000003299	1628.78	-0.272092	0.828118	0.0948174	-2.86964	0.00410941	0.0299096	Mrpl4
										ENSMUSG00000020321	8829.25	-0.271588	0.828407	0.0920325	-2.951	0.00316745	0.0246266	Mdh1
										ENSMUSG00000040212	5898.24	-0.271544	0.828432	0.0845807	-3.21048	0.00132516	0.0128739	Emp3
										ENSMUSG00000029621	2745.18	-0.271414	0.828507	0.0803812	-3.37658	0.000733927	0.00820779	Arpc1a
										ENSMUSG00000022516	1252.71	-0.270938	0.82878	0.0985146	-2.75024	0.00595522	0.0390151	Nudt16l1
										ENSMUSG00000002996	2370.21	-0.270739	0.828895	0.0827423	-3.27208	0.00106761	0.0108796	Hbp1
										ENSMUSG00000023707	937.56	-0.270631	0.828957	0.0971831	-2.78476	0.00535675	0.036172	Ogfod2
										ENSMUSG00000000959	2029.69	-0.270589	0.828981	0.0927772	-2.91655	0.0035393	0.0268622	Oxa1l
										ENSMUSG00000029810	15101.4	-0.26964	0.829527	0.088777	-3.03727	0.00238729	0.0201223	Tmem176b
										ENSMUSG00000032602	1267.01	-0.269416	0.829655	0.101941	-2.64286	0.00822083	0.0494771	Slc25a20
										ENSMUSG00000025794	8446.24	-0.268233	0.830336	0.0944705	-2.83932	0.00452091	0.0320966	Rpl14
										ENSMUSG00000047187	5701.24	-0.267649	0.830672	0.081856	-3.26976	0.0010764	0.0109392	Rab2a
										ENSMUSG00000003161	1831.92	-0.266999	0.831046	0.0970653	-2.75072	0.00594649	0.0389742	Sri
										ENSMUSG00000029826	2095.01	-0.266067	0.831584	0.100696	-2.64227	0.0082352	0.0495254	Zc3hav1
										ENSMUSG00000045205	2017.34	-0.265462	0.831932	0.100613	-2.63844	0.00832891	0.0498968	Dpy19l4
										ENSMUSG00000031516	920.1	-0.265403	0.831966	0.0988047	-2.68613	0.00722842	0.0451581	Dctn6
										ENSMUSG00000008682	7060.85	-0.265288	0.832033	0.0871433	-3.04427	0.00233246	0.0198227	Rpl10
										ENSMUSG00000024096	2208.67	-0.264633	0.832411	0.0955903	-2.7684	0.00563319	0.0375995	Ralbp1
										ENSMUSG00000021518	1682.59	-0.264161	0.832683	0.0968698	-2.72697	0.00639194	0.0410662	Ptdss1
										ENSMUSG00000019505	4916.78	-0.263837	0.83287	0.080847	-3.26341	0.00110079	0.0111233	Ubb
										ENSMUSG00000081534	4304.9	-0.263368	0.833141	0.0868449	-3.03262	0.00242442	0.0203714	Slc48a1
										ENSMUSG00000031839	3450.32	-0.263284	0.833189	0.0970256	-2.71356	0.00665654	0.0424518	Hsbp1
										ENSMUSG00000027406	4107.86	-0.262134	0.833854	0.0947365	-2.76698	0.00565785	0.0377128	Idh3b
										ENSMUSG00000036438	9685.09	-0.261722	0.834092	0.0908623	-2.88043	0.00397139	0.0292313	Calm2
										ENSMUSG00000087679	2418.4	-0.259571	0.835336	0.0911614	-2.84738	0.00440813	0.0315253	NA
										ENSMUSG00000039770	3097.24	-0.258763	0.835804	0.078132	-3.31187	0.000926745	0.0097669	Ypel5
										ENSMUSG00000031672	2038.3	-0.258454	0.835983	0.0955281	-2.70553	0.00681954	0.0432089	Got2
										ENSMUSG00000031990	1279.32	-0.25748	0.836548	0.094347	-2.72907	0.00635129	0.0409567	Jam3
										ENSMUSG00000025130	13653.7	-0.256099	0.837349	0.0888322	-2.88295	0.00393968	0.0290809	P4hb
										ENSMUSG00000053565	2453.3	-0.255808	0.837518	0.0949974	-2.69279	0.00708561	0.0445647	Eif3k
										ENSMUSG00000058655	7897.51	-0.25571	0.837575	0.0937322	-2.7281	0.0063701	0.0410185	Eif4b
										ENSMUSG00000022553	1710.76	-0.253354	0.838944	0.0902209	-2.80815	0.00498263	0.034359	Maf1
										ENSMUSG00000061983	8436.18	-0.253129	0.839074	0.0928033	-2.72759	0.00637987	0.0410224	Rps12
										ENSMUSG00000058600	3776.52	-0.252953	0.839177	0.0923895	-2.7379	0.00618338	0.0401392	Rpl30
										ENSMUSG00000037058	6470.31	-0.252686	0.839332	0.0951649	-2.65524	0.00792516	0.0481056	Paip2
										ENSMUSG00000020803	1843.75	-0.247825	0.842165	0.0890646	-2.78253	0.00539362	0.0363894	Txndc17
										ENSMUSG00000030654	8289.54	-0.246948	0.842677	0.0718559	-3.43671	0.000588816	0.00699589	Arl6ip1
										ENSMUSG00000019428	5693.93	-0.246381	0.843008	0.0904483	-2.724	0.00644959	0.0413856	Fkbp8
										ENSMUSG00000028757	3430.06	-0.245599	0.843465	0.0817271	-3.00512	0.00265479	0.0215531	Ddost
										ENSMUSG00000002871	1821.66	-0.243531	0.844675	0.0831941	-2.92727	0.00341954	0.026235	Tpra1
										ENSMUSG00000000346	8196.98	-0.24181	0.845684	0.0903863	-2.67529	0.0074665	0.0462822	Dazap2
										ENSMUSG00000018326	9096.4	-0.239729	0.846905	0.0777179	-3.0846	0.00203824	0.017978	Ywhab
										ENSMUSG00000006095	1617.79	-0.239601	0.846979	0.0906879	-2.64204	0.00824073	0.0495269	Tbcb
										ENSMUSG00000029048	3695.17	-0.234285	0.850106	0.0871941	-2.68694	0.00721107	0.0450959	Rer1
										ENSMUSG00000020029	8892.86	-0.231784	0.851581	0.0790742	-2.93122	0.00337637	0.025992	Nudt4
										ENSMUSG00000040043	1685.68	-0.228238	0.853677	0.0855294	-2.66853	0.00761846	0.0468819	Rbms2
										ENSMUSG00000015357	1896.14	-0.226769	0.854546	0.0820039	-2.76535	0.00568625	0.0377897	Clpx
										ENSMUSG00000027248	15145.9	-0.226197	0.854885	0.0764313	-2.95948	0.00308159	0.0241753	Pdia3
										ENSMUSG00000001847	7775.03	-0.225596	0.855242	0.0732315	-3.08059	0.00206592	0.0181338	Rac1
										ENSMUSG00000043716	11217.1	-0.224563	0.855854	0.0842498	-2.66545	0.00768864	0.0471963	Rpl7
										ENSMUSG00000028081	8588.1	-0.223893	0.856252	0.0843649	-2.65387	0.00795751	0.0482457	Rps3a1
										ENSMUSG00000034781	3106.16	-0.219206	0.859038	0.0825882	-2.6542	0.00794964	0.0482167	Gna11
										ENSMUSG00000031320	8333.06	-0.218084	0.859707	0.0767485	-2.84154	0.00448969	0.0319476	Rps4x
										ENSMUSG00000031633	5600.47	-0.215187	0.861435	0.074104	-2.90384	0.00368613	0.0276805	Slc25a4
