# Supplementary material for: Succinate mediates inflammation-induced adrenocortical dysfunction
Source: eLife journal article supplement (doi:10.7554/elife.83064), 2023-07-14
Supplement: supp [file Figure1_SourceData2.xlsx]

## Sheet: adrenal_expression_sf_normalize
Figure 1 - Source Data 2
Figure 1 B, D; 2 A; 3 A, H; 6 A: RNAseq analysis in adrenal cortex of PBS- and LPS-mice
Gene	LPS_1R	LPS_2R	LPS_3R	PBS_11R	PBS_13R	PBS_14R
Gnai3	6685.59	7924.78	7735.28	6081.53	5948.13	5837.09
Pbsn	0	0	0	0	0	0
Cdc45	89.1053	81.5962	143.058	82.1088	114.737	110.928
H19	2.70016	3.9803	2.02919	4.37914	2.86841	0
Scml2	10.8006	17.9114	14.2043	19.7061	19.1228	16.4338
Apoh	0	0.995075	0	8.75827	1.91228	5.13557
Narf	320.419	288.572	327.714	398.501	337.517	420.09
Cav2	937.855	933.381	1220.56	1127.63	1021.16	936.728
Klf6	1529.19	1705.56	1507.69	1491.1	1280.27	1564.3
Scmh1	478.828	411.961	448.451	504.695	467.551	488.907
Cox5a	2032.32	2332.46	2359.95	2512.53	2524.2	2573.95
Tbx2	575.134	564.208	591.509	721.463	623.402	514.584
Tbx4	0.900053	4.97538	0	0	0.956138	1.02711
Zfy2	0	0	0	0	0	0
Ngfr	92.7055	42.7882	26.3795	27.3696	20.0789	9.24403
Wnt3	0	3.9803	1.0146	0	0.956138	3.08134
Wnt9a	43.2025	47.7636	41.5984	53.6444	30.5964	54.4371
Fer	398.724	409.971	364.24	259.464	292.578	277.321
Xpo6	1736.2	1652.82	1571.61	1406.8	1297.48	1309.57
Tfe3	899.153	840.839	954.734	857.216	847.138	828.881
Axin2	1076.46	827.903	955.749	1251.34	1056.53	707.682
Brat1	404.124	476.641	357.138	428.061	458.946	427.28
Gna12	3250.09	3358.38	3637.33	3929.18	3729.89	3743.83
Slc22a18	15.3009	18.9064	32.4671	24.0853	43.0262	36.9761
Itgb2l	0	0	0	0	0	0
Igsf5	0	0	1.0146	0	0	0
Pih1d2	37.8022	52.739	40.5838	37.2227	45.8946	34.9219
Dlat	1773.1	1697.6	1969.33	1945.43	1852.04	1946.38
Sdhd	2638.06	2951.39	3168.58	3319.39	3267.12	3329.91
Fgf23	0	0	1.0146	0	0	0
Fgf6	0	0	0	0	0	0
Ccnd2	12076.9	10247.3	11571.5	12328.4	12196.5	12783.5
Gpr107	2171.83	2433.95	2179.35	2057.1	1951.48	2023.42
Nalcn	130.508	36.8178	30.4379	31.7487	21.9912	16.4338
Btbd17	0	0	0	0	0	0
Slfn4	139.508	288.572	13.1897	0	0.956138	0
Th	2755.96	863.726	246.547	476.231	589.937	55.4642
Ins2	0	0.995075	1.0146	1.09478	0	8.21692
Scnn1g	0	0	0	0	0	0
Drp2	4.50027	5.97045	5.07298	7.66349	4.78069	8.21692
Tspan32	16.201	14.9261	16.2335	36.1279	22.9473	26.705
Lhx2	2.70016	5.97045	0	0	0	0
Clec2g	0	0	0	0	0	0
Gmpr	173.71	128.365	176.54	327.34	307.876	330.731
Glra1	0	0	0	0	0	0
Mid2	1026.06	854.77	1012.57	1169.23	980.041	1009.65
Trim25	3971.93	3794.22	4615.4	4044.13	4342.78	5437.54
Dgke	859.551	666.701	1129.24	599.942	702.761	1027.11
Scpep1	2804.57	2967.32	3367.44	3201.15	3688.78	3576.41
Mnt	513.03	464.7	505.269	558.34	464.683	547.452
Itgb2	289.817	257.725	195.817	165.312	152.982	160.23
Hddc2	432.926	469.676	650.356	726.937	828.015	808.339
Tpd52l1	598.535	407.981	796.458	931.661	997.252	809.366
Pemt	67.504	74.6307	87.2552	72.2558	100.394	82.1692
Cdh1	0	2.98523	0	0	0.956138	1.02711
Cdh4	58.5035	29.8523	41.5984	38.3174	46.8507	55.4642
Ckmt1	41.4024	7.9606	3.04379	12.0426	3.82455	9.24403
Bcl6b	855.05	1115.48	802.545	324.056	501.016	297.863
Clec10a	7.20042	1.99015	2.02919	8.75827	5.73683	9.24403
Alox12	48.6029	50.7488	77.1093	63.4975	55.456	35.949
Arvcf	188.111	140.306	118.708	200.345	183.578	193.098
Comt	808.248	842.829	841.1	620.743	697.98	756.983
Rtca	937.855	1043.83	959.807	782.771	804.112	821.692
Dbt	2128.63	2192.15	2568.96	2605.59	3049.12	2902.63
Dazap2	7239.13	7028.22	8267.94	8953.14	8753.44	8940
Mcts1	882.952	859.745	995.318	979.832	982.91	1019.92
Rem1	159.309	298.523	157.262	156.554	159.675	156.121
Rnf17	52.2031	42.7882	51.7444	14.2322	28.6841	28.7592
Trappc10	1512.09	1476.69	1559.43	1183.46	1313.73	1198.64
Ccm2	504.03	626.898	542.809	507.98	572.726	576.211
Wap	0	0	0	0	0	0
Tbrg4	766.845	803.026	754.859	548.487	576.551	554.642
Tmprss2	0	0	0	1.09478	2.86841	0
Mx1	450.027	649.784	95.372	16.4218	17.2105	36.9761
Fap	38.7023	33.8326	29.4233	12.0426	14.3421	9.24403
Gcg	0	0	0	0	0	4.10846
Ndufa9	2322.14	2350.37	2676.5	3050.07	3202.11	3302.17
Egfl6	96.3057	78.611	157.262	153.27	137.684	124.281
Lck	92.7055	80.6011	72.0363	59.1183	69.798	66.7624
Tssk3	0	0	0	0	0	1.02711
Cttnbp2	1677.7	1406.04	1579.73	2260.73	1591.97	1496.51
Galnt1	2098.92	2136.43	2128.62	2137.02	1918.01	2077.85
Myf5	0	0	0	0	0	0
Mkrn2	1026.06	1179.16	1136.35	1102.45	1165.53	1191.45
Pparg	38.7023	32.8375	38.5546	84.2984	31.5525	29.7863
Raf1	2033.22	2258.82	2058.61	1902.73	1927.57	1896.05
Sept1	63.0037	66.6701	75.0801	135.753	101.351	104.766
Pdgfb	1305.08	1682.67	930.384	1056.47	993.427	1268.49
Acvrl1	413.124	436.838	379.459	378.795	358.552	391.331
Grasp	410.424	287.577	267.853	318.582	297.359	806.285
Acvr1b	337.52	315.439	237.415	286.833	259.113	312.243
Tom1l2	2486.85	2242.9	2634.9	2603.4	2543.33	2854.35
Gpa33	16.201	10.9458	13.1897	25.18	28.6841	38.0032
Zfp385a	209.712	185.084	177.554	214.578	214.175	191.043
Itga5	889.252	1056.77	701.086	686.43	652.086	883.319
Gabra2	0	0	0	0	0	0
Wdr77	1191.67	1408.03	1175.92	1099.16	1049.84	1148.31
Adora3	2.70016	9.95075	3.04379	4.37914	1.91228	1.02711
Atp5f1	6286.87	6921.75	7555.69	7294.55	7667.27	8280.6
Sox9	95.4056	105.478	48.7006	90.8671	88.9208	98.603
Hnrnpd	2888.27	2656.85	2538.52	2484.07	2539.5	2608.87
Dynlt1c	6.30037	0.995075	2.02919	0	2.86841	6.16269
C1d	2279.83	2547.39	2892.61	2860.67	2807.22	2935.49
Gm2a	7843.96	7485.95	8106.62	9871.67	9362.5	10536.1
Krit1	1117.87	1087.62	1106.92	1035.67	932.234	840.18
Clcn4	2983.68	2501.62	3603.84	3573.38	3667.74	3871.19
Vmn2r88	0	0	0	0	0	0
Grm6	0	0	0	0	0	0
Sema4f	27.9016	10.9458	5.07298	3.28435	4.78069	1.02711
Hk2	331.22	244.789	209.007	181.734	168.28	419.063
Myo18a	2895.47	2226.98	2976.82	3323.76	3418.19	3188.16
Sez6	14.4008	1.99015	0	2.18957	3.82455	6.16269
Haao	2.70016	1.99015	1.0146	4.37914	8.60524	5.13557
Cd52	453.627	486.592	326.7	331.72	251.464	347.165
Abhd15	87.3052	95.5272	104.503	100.72	87.0085	103.739
Hoxb6	779.446	760.238	819.793	1136.39	820.366	1281.84
Loxl3	120.607	102.493	88.2698	107.289	101.351	94.4945
Tcl1b5	0	0	0	0	0	0
Btn1a1	1.80011	0	0	2.18957	0	0
Kat2b	2339.24	2051.85	2195.58	2299.05	2273.7	2107.64
Rab5b	1753.3	1755.31	2013.97	1969.52	2153.22	1991.58
Cryba1	0	0	0	0	0	0
Dnmt3l	310.518	542.316	444.393	228.81	406.359	301.972
Aire	0	0	0	0	0	0
Icosl	584.134	467.685	277.999	408.354	501.016	523.828
Spg7	1763.2	1567.24	1940.92	1724.28	1926.62	1955.63
Sult5a1	51.303	17.9114	40.5838	49.2653	35.3771	35.949
Rpl13	4462.46	5328.63	5195.74	5351.3	5663.2	5993.21
Chmp1a	2486.85	2775.27	2830.72	2639.52	2736.47	2814.29
Rpa1	1320.38	1284.64	1485.37	1554.59	1480.1	1565.32
Serpinf1	46.8028	32.8375	35.5108	84.2984	30.5964	23.6236
Tubgcp3	884.752	912.484	851.246	725.842	746.744	691.248
Oprm1	1.80011	0	0	0	0	0
Polr3d	504.03	589.085	409.897	367.847	417.832	475.554
Tcf7	1646.2	1411.02	1656.83	2014.4	1850.13	1817.99
Ddx3x	11881.6	11725	13753.9	8773.6	9814.75	10527.9
Il12rb1	9.90058	8.95568	1.0146	2.18957	2.86841	5.13557
Slc5a5	0.900053	0	1.0146	2.18957	0.956138	1.02711
Kcnn3	53.1031	27.8621	12.1751	29.5592	10.5175	21.5694
Usp32	1677.7	1775.21	1853.67	1589.63	1641.69	1544.78
Car4	1.80011	0	4.05838	26.2748	0	0
Txnrd3	349.221	349.271	449.466	385.364	492.411	377.978
Fasl	2.70016	5.97045	3.04379	8.75827	2.86841	1.02711
Zfp512b	948.656	1038.86	985.172	953.557	899.726	775.471
Dnajc5	3214.99	3334.5	3193.95	2639.52	2597.83	2645.85
Tpd52l2	3442.7	3804.17	3852.42	3951.08	3952.67	4003.69
Fmr1	1998.12	2038.91	2066.73	1822.82	1812.84	1769.72
Bcl11a	98.1058	90.5519	102.474	55.834	97.526	85.2505
Il4	0	0.995075	1.0146	0	0	0
Pxmp4	765.045	633.863	798.487	979.832	956.138	1004.52
Dlg3	1909.01	1798.1	2064.7	2280.44	2419.98	2421.94
Gnb1l	107.106	104.483	101.46	102.91	99.4383	92.4403
Dbh	3294.19	973.184	272.926	502.506	482.85	57.5184
Mmp11	227.713	229.862	202.919	268.222	224.692	259.86
Smarcb1	1493.19	1462.76	1407.24	1510.8	1539.38	1527.32
Vpreb3	2.70016	0.995075	1.0146	1.09478	0.956138	3.08134
Hip1r	456.327	377.134	346.992	246.326	294.49	318.406
Nsun5	252.015	302.503	245.532	187.208	192.184	205.423
Top1mt	342.92	308.473	340.904	282.454	372.894	343.056
Hoxa10	0	0	0	0	0.956138	0
Hoxa4	27.0016	13.9311	13.1897	19.7061	16.2543	10.2711
NA	27.9016	16.9163	20.2919	19.7061	12.4298	10.2711
Mmp14	1224.97	1282.65	943.574	1020.34	959.962	1043.55
Slc7a7	105.306	112.444	52.759	63.4975	57.3683	67.7896
Oxa1l	1720.9	1968.26	1831.35	2170.96	2279.43	2207.27
Heatr6	442.826	423.902	382.503	354.71	337.517	358.463
Ccl3	47.7028	37.8129	9.13136	12.0426	3.82455	4.10846
Wfdc18	0.900053	0	3.04379	4.37914	0.956138	1.02711
Icam4	40.5024	26.867	38.5546	76.6349	73.6226	80.1149
Ilf2	1453.59	1645.85	1498.56	1438.55	1655.07	1569.43
Chtop	2867.57	3028.01	2797.24	2341.74	2552.89	2582.17
Snapin	1933.31	1976.22	2265.59	2289.19	2627.47	2674.61
S100a4	27.9016	20.8966	6.08757	7.66349	2.86841	3.08134
S100a3	0.900053	0	0	0	0	0
S100a5	0	0	0	0	0	0
S100a6	291.617	264.69	196.832	266.033	137.684	206.45
Scn4a	4.50027	2.98523	5.07298	2.18957	1.91228	3.08134
Icam2	363.621	483.607	353.079	318.582	385.323	352.3
Mapk7	382.523	355.242	324.671	293.402	283.973	273.212
Epn2	765.945	710.484	648.327	703.946	600.454	685.085
B9d1	153.909	166.178	197.846	243.042	233.298	255.752
Sec24b	1231.27	1152.3	1093.73	1184.56	1096.69	975.759
N4bp3	351.921	349.271	143.058	199.251	171.149	202.342
Rmnd5b	940.555	885.617	850.231	901.007	939.883	988.084
Nhp2	1355.48	1739.39	1430.58	1144.05	1247.76	1283.89
Vps9d1	537.332	536.346	583.392	557.245	571.77	572.103
Zfp276	548.132	544.306	501.21	487.179	570.814	574.157
C1ql4	0	0	0	0	0	0
Mfsd10	429.325	387.084	382.503	397.407	360.464	352.3
Luzp1	847.85	849.794	827.91	745.548	735.27	647.082
Slc13a2	0	1.99015	0	0	0	1.02711
Kctd10	1715.5	1881.69	1699.45	1733.04	1653.16	1637.22
Poldip2	3060.18	3212.1	3837.2	3755.11	3981.36	4241.98
Sebox	0	0	0	0	0	0
Ift20	1729.9	1784.17	2061.66	2191.76	2443.89	2428.1
Col6a1	4598.37	4178.32	5320.54	5760.75	7119.4	7365.44
Pcbp3	408.624	346.286	341.919	370.037	311.701	313.27
Lgals9	3128.58	4449.98	1182	709.42	671.209	747.739
Araf	1849.61	1809.05	2068.76	1903.83	2086.29	2014.17
Cfp	82.8049	72.6405	51.7444	33.9383	45.8946	48.2744
Timp1	2123.23	2909.6	1418.4	694.093	674.077	854.559
Uxt	304.218	298.523	334.817	309.824	288.754	279.375
Cnnm3	658.839	654.76	673.691	782.771	912.155	914.132
Lman2l	817.248	676.651	850.231	1056.47	1018.29	1093.88
Mcm3ap	672.34	694.563	588.465	548.487	651.13	609.079
Pcnt	498.629	548.287	573.247	538.634	592.805	526.91
Ftcd	0	0	0	0	0	0
Mxd1	211.512	217.922	161.321	255.085	211.306	204.396
Gmcl1	648.938	681.627	693.983	712.704	830.884	810.393
Snrnp27	902.753	1039.85	994.304	999.538	1134.94	1191.45
Oas1c	115.207	107.468	77.1093	70.0662	83.184	77.0336
Oas1h	0	0	0	0	0	0
Ocrl	1558.89	1585.16	1494.5	1253.53	1437.07	1432.82
Calm1	8882.62	9405.45	8932.5	8588.58	8818.46	9353.93
Agpat3	3821.63	4611.18	4621.48	4260.9	4460.38	4628.18
Slc26a3	0	0	0	0	0	1.02711
Sema6b	192.611	230.858	120.737	197.061	186.447	258.833
Uhrf1	64.8038	38.8079	75.0801	51.4549	43.0262	41.0846
Dpp9	610.236	689.587	673.691	567.098	613.84	609.079
Ramp2	395.123	507.488	409.897	523.307	399.666	483.771
Lsr	217.813	179.114	229.299	365.658	261.982	304.026
Gramd1a	743.444	657.745	673.691	744.453	641.568	709.736
Hpn	5.40032	2.98523	4.05838	8.75827	0.956138	2.05423
Gabrg1	1.80011	0	0	0	0	0
Ckb	773.146	726.405	1019.67	1267.76	1131.11	1250
Sp1	2039.52	2019.01	2031.22	2052.72	1874.03	1858.05
Itgb7	48.6029	42.7882	25.3649	33.9383	23.9034	33.8948
Myg1	664.239	655.755	819.793	965.6	968.567	914.132
Rarg	521.131	410.966	477.875	491.558	455.122	406.737
Pfdn5	2891.87	2802.13	3386.72	4083.54	4476.64	4274.85
Efnb2	548.132	527.39	674.706	842.984	720.928	523.828
Rrp15	562.533	592.07	533.677	359.089	416.876	473.5
Rnd2	198.012	147.271	228.284	267.127	251.464	278.348
Srr	853.25	677.646	946.618	1036.76	964.743	1071.28
Sync	8.10048	2.98523	4.05838	1.09478	0	1.02711
Fndc5	43.2025	21.8917	11.1606	14.2322	21.035	8.21692
Acp5	476.128	512.464	465.699	391.933	267.719	343.056
Cnn1	4.50027	2.98523	3.04379	6.5687	1.91228	7.1898
Fbxo9	1328.48	1248.82	1496.53	1310.46	1474.36	1465.69
Vps50	972.957	1017.96	1045.03	988.59	1027.85	969.596
Hars	2133.13	2353.35	2352.85	2065.86	2178.08	2192.89
Zmat2	2510.25	2560.33	2776.95	2771.99	2902.83	3161.46
Ube2c	51.303	60.6996	55.8028	77.7297	40.1578	35.949
Smg5	1283.48	1579.18	1404.2	857.216	977.173	857.641
Cct3	4520.97	5388.33	4571.77	3883.2	4316.01	4153.65
Glmp	1589.49	1559.28	1856.71	2192.85	2220.15	2167.21
Mef2d	2262.73	2244.89	2055.57	1719.91	1705.75	2204.19
Tmem79	22.5013	17.9114	34.4963	39.4122	37.2894	28.7592
Snd1	3106.98	2855.87	2816.52	2792.79	2959.25	3033.07
Col18a1	1134.97	1234.89	1084.6	1116.68	1083.3	1094.9
Slc19a1	324.919	327.38	333.802	327.34	293.534	307.107
Kpnb1	4552.47	4791.29	4343.48	3595.27	3804.47	3632.9
Npepps	2342.84	2258.82	2328.5	2771.99	2902.83	2764.99
Tbx21	11.7007	11.9409	7.10217	2.18957	6.69296	0
Mrpl10	2548.05	2593.17	2956.53	3294.21	3319.71	3342.23
Cyp51	1358.18	1156.28	3655.59	800.287	1603.44	1090.8
Tcf25	4722.58	4776.36	4907.6	4163.46	4309.31	4538.82
Tubb6	3088.08	4560.43	3050.89	2183	2555.76	2594.49
Def8	720.042	621.922	714.275	747.738	766.822	805.258
Meox1	279.016	305.488	174.51	171.881	128.122	163.311
Sost	0	0	0	0	0	0
Nkx2-1	0	0	0	0	0	0
Pax9	0	0	0	0	0	0
Irx2	0	0	2.02919	0	0	1.02711
Col1a1	432.926	295.537	325.685	546.297	396.797	283.484
Itga3	1197.07	1266.73	1220.56	1115.58	1053.66	1073.33
Sgca	0.900053	1.99015	3.04379	1.09478	1.91228	1.02711
Dlx3	0	0	0	1.09478	0	1.02711
Foxm1	67.504	48.7587	70.0071	45.9809	33.4648	41.0846
Itfg2	511.23	596.05	512.371	538.634	575.595	505.34
Nrip2	23.4014	24.8769	21.3065	32.8435	22.9473	21.5694
Tulp3	1109.77	1185.13	948.647	1025.81	1001.08	1281.84
Gtf2h4	258.315	244.789	299.306	252.895	284.929	231.101
Tubb5	3606.51	4191.26	3049.87	3034.74	3011.83	3199.46
Ell2	636.338	661.725	988.216	514.549	642.525	764.173
Jup	1149.37	863.726	1214.47	1541.46	1416.04	1232.54
Fkbp10	916.254	830.888	941.545	1287.47	1019.24	1229.46
Klhl10	6.30037	3.9803	4.05838	17.5165	17.2105	9.24403
Mnx1	0	0	0	0	0	1.02711
Nom1	1415.78	1463.76	1471.16	1256.81	1290.79	1239.73
Ergic1	2661.46	2845.92	2675.49	2478.59	2556.71	2621.2
Tnk1	0	0	0	0	0.956138	0
Acap1	8.10048	2.98523	6.08757	12.0426	11.4737	3.08134
Tcea3	8.10048	9.95075	8.11676	24.0853	16.2543	19.5152
Csn3	0.900053	8.95568	0	9.85306	0	0
Ifrd1	2585.85	3133.49	2516.2	1740.71	1807.1	1862.16
Stk38l	465.327	455.745	482.948	448.861	494.323	455.012
Brpf1	611.136	618.937	643.254	502.506	594.718	658.38
Akr1b3	4097.04	4928.61	4275.51	3369.75	4176.41	4270.74
Hoxc13	0	0	0	0	0	0
Hoxc11	0	0	0	0	0	0
Hoxc8	778.546	900.543	821.822	756.496	734.314	531.018
Hoxc6	588.635	704.513	502.225	734.6	536.393	525.883
Gstt1	420.325	333.35	488.02	770.728	671.209	701.519
Gstt3	117.907	123.389	136.97	255.085	221.824	216.721
Ddt	252.015	283.597	335.831	413.828	498.148	474.527
Tat	0	0	0	4.37914	1.91228	1.02711
Marveld3	0	0.995075	0	0	0	0
Ddx18	594.035	619.932	582.378	439.008	478.069	525.883
Ubl3	3424.7	3456.89	3947.79	3992.68	4316.01	3797.24
Gramd3	167.41	160.207	137.985	149.985	162.543	173.582
Eef1e1	915.354	1186.13	1014.6	811.235	787.857	835.044
Akt1	6550.59	7523.77	7424.81	5922.78	6393.69	6707.06
Cldn15	241.214	190.059	269.882	285.739	317.438	282.456
Il16	137.708	123.389	107.547	202.535	173.061	221.857
Tcirg1	1494.09	1659.79	967.924	719.273	799.331	716.926
Naglu	982.858	1017.96	1130.26	1081.65	1299.39	1262.32
Coasy	1465.29	1503.56	1609.15	1421.03	1902.71	1753.28
Smo	1437.38	1468.73	1522.91	1553.5	1601.53	1654.68
Tspan33	50.403	43.7833	57.832	53.6444	38.2455	68.8167
Crnkl1	878.452	887.607	871.538	738.979	859.568	838.125
Rin2	665.139	540.326	559.042	629.501	521.095	766.227
Folh1	37.8022	44.7784	35.5108	27.3696	15.2982	29.7863
Chordc1	1595.79	1837.9	1657.85	1622.47	1501.14	1465.69
Rtcb	2953.97	3085.73	2934.21	2765.42	3061.55	2995.07
Pwp1	761.445	783.124	716.305	616.363	629.139	637.838
Fbxo7	452.727	478.631	426.13	417.113	444.604	418.036
Capns1	9821.38	8705.92	10471.6	12627.2	12808.4	13771.6
Lrp3	498.629	437.833	526.575	483.895	465.639	465.283
Dsg4	0	0	0	0	0	0
Evx2	0	0	0	0	0	0
Hoxd13	0	0	0	0	0	0
Hoxd12	0	0	0	0	0	0
Folr1	0.900053	4.97538	4.05838	3.28435	4.78069	1.02711
Clpb	1010.76	1037.86	1067.35	983.116	1295.57	1170.91
Sept7	4124.04	4383.31	4351.6	4171.13	3955.54	3955.42
Zdhhc4	657.939	645.804	716.305	734.6	768.735	769.309
Rac1	6961.01	7065.04	7479.6	8341.16	8373.85	8429.53
Nup214	738.044	673.666	615.86	643.733	647.305	598.808
Aif1l	879.352	520.424	876.611	1451.68	1086.17	1275.68
Cpa3	45.0027	28.8572	24.3503	32.8435	27.728	19.5152
Ltbp1	249.315	185.084	215.094	305.445	329.867	313.27
Ugp2	1457.19	1652.82	1599	1535.98	1533.64	1511.91
Kcnh6	2.70016	0	0	0	0	7.1898
Trmt1	820.848	859.745	888.786	880.206	898.769	850.451
Nacc1	2026.92	1965.27	1894.25	1925.73	1670.37	1727.61
Nfix	1032.36	1030.9	786.312	805.761	806.98	746.712
Slc1a5	332.12	323.4	250.605	500.316	149.157	138.66
Uba1	7433.54	7893.93	7696.72	6744.96	7836.5	7224.72
Vwf	28.8017	15.9212	11.1606	6.5687	3.82455	17.4609
Siae	617.436	490.572	670.648	963.41	893.989	934.674
Vsig2	33.302	18.9064	22.3211	24.0853	17.2105	18.4881
Esam	908.154	902.533	988.216	1158.28	1222.9	1139.07
Spa17	59.4035	50.7488	94.3574	112.763	132.903	135.579
Fam50a	1116.97	1272.7	1346.37	1122.15	1424.65	1278.76
Emd	934.255	929.401	1359.56	818.899	844.27	990.138
Taco1	273.616	332.355	294.233	203.63	261.982	236.236
Grik3	10.8006	3.9803	2.02919	1.09478	4.78069	0
Gria3	1437.38	1145.33	1750.18	1346.58	1524.08	1702.96
Npas1	4.50027	3.9803	2.02919	0	0	0
Sipa1l2	1552.59	1457.79	1477.25	1585.25	1511.65	1492.4
Ap4e1	315.919	303.498	253.649	201.44	155.85	221.857
Blvra	466.228	415.942	449.466	538.634	497.192	520.747
Pdzd4	137.708	96.5223	82.1822	100.72	101.351	95.5217
Srpk3	1.80011	0.995075	2.02919	3.28435	1.91228	2.05423
Idh3g	3764.02	3651.93	4355.66	4392.27	4681.25	4776.08
Pnck	129.608	75.6257	116.678	139.038	151.07	158.176
Ssr4	1736.2	2264.79	2021.07	2073.52	2181.91	2269.92
Bcap31	3056.58	2831.98	3330.92	3620.45	4201.27	4089.97
Fam98a	831.649	917.46	869.508	604.321	755.349	640.919
Ltbp2	15.3009	6.96553	16.2335	9.85306	0.956138	2.05423
Kmt2a	1194.37	1128.42	1144.46	1217.4	1136.85	1118.53
Ift46	859.551	803.026	899.946	914.145	1075.65	947
Tmem25	69.3041	49.7538	80.1531	151.08	147.245	136.606
Cd3g	14.4008	14.9261	10.146	19.7061	15.2982	13.3525
Trappc6a	614.736	560.228	769.063	874.732	1064.18	1102.09
Supt6	1864.01	1749.34	1975.42	1740.71	1918.01	1745.07
Spag5	89.1053	62.6898	93.3428	82.1088	79.3594	95.5217
Foxn1	6.30037	1.99015	4.05838	3.28435	5.73683	0
Unc119	936.055	739.341	802.545	1292.94	1282.18	1198.64
Rab34	1819.91	1726.46	2077.89	2081.18	2297.6	2298.68
Sdf2	2162.83	2459.83	2692.74	2681.13	2965.94	3170.7
Ccne1	55.8033	54.7292	50.7298	42.6966	43.9823	51.3557
Hsf2bp	0	1.99015	1.0146	0	0	2.05423
Bbc3	56.7033	80.6011	44.6422	89.7723	55.456	43.1388
Mybpc3	2.70016	1.99015	1.0146	2.18957	1.91228	4.10846
Psmc3	3110.58	3222.05	3272.07	3109.19	3758.58	3692.48
Acp2	2077.32	1980.2	2131.67	2221.32	2287.08	2490.75
Rapsn	31.5019	40.7981	46.6714	47.0757	60.2367	58.5455
Slc39a13	547.232	596.05	635.137	579.141	602.367	689.194
Celf2	306.018	217.922	249.591	355.805	239.991	211.586
Nr1h3	439.226	411.961	335.831	363.468	374.806	373.87
Ddb2	135.008	111.448	178.569	174.071	162.543	188.989
Spi1	342.02	410.966	183.642	176.26	182.622	170.501
Sf3a1	1097.16	1222.95	1073.44	987.495	1148.32	1109.28
Stat6	2213.23	2398.13	2212.83	2094.32	2181.91	2149.75
Clgn	1.80011	0	0	1.09478	0.956138	0
Napsa	50.403	68.6602	40.5838	13.1374	21.9912	21.5694
Vrk3	999.959	1117.47	980.099	1021.43	1133.02	1125.72
Smg9	416.725	452.759	386.561	325.151	452.253	343.056
Paxip1	518.431	575.154	601.655	535.349	523.963	494.042
Rmnd5a	2675.86	2461.82	2993.06	3223.04	3269.99	3140.92
Mov10	566.133	645.804	267.853	364.563	403.49	400.575
Ppm1j	47.7028	51.7439	49.7152	40.507	39.2016	41.0846
Rhoc	1952.22	2460.82	1552.33	1476.86	1495.4	1455.42
Prr27	0	0	0	0	0	0
Tead3	211.512	216.926	194.802	225.526	181.666	203.369
Ppard	657.939	668.691	894.873	674.387	632.963	738.495
Def6	16.201	16.9163	41.5984	32.8435	31.5525	39.0304
Peg3	623.737	271.656	414.97	547.392	538.306	435.497
Zim1	56.7033	67.6651	50.7298	44.8861	33.4648	31.8406
Metrn	370.822	388.079	548.896	712.704	659.735	668.652
Lmf1	405.924	381.114	472.802	446.672	520.139	585.455
Narfl	497.729	579.134	525.561	477.326	530.656	536.154
Angptl4	1186.27	1513.51	850.231	812.33	902.594	700.492
Dbf4	116.107	104.483	108.562	74.4453	98.4822	93.4674
Daxx	716.442	729.39	588.465	551.771	497.192	576.211
Cd320	378.022	404.001	415.984	426.966	469.464	453.985
Ipo4	2018.82	2413.06	1988.61	1304.98	1695.23	1548.89
Tm9sf1	1241.17	1232.9	1256.07	878.017	903.55	1016.84
Rec8	454.527	199.015	264.809	387.554	437.911	253.697
Irf9	1792.01	2148.37	1227.66	1227.25	1435.16	1547.86
Gmpr2	563.433	602.021	590.495	538.634	730.489	677.896
Mdp1	1546.29	1544.36	1592.92	1403.51	1618.74	1650.57
Dhrs1	675.04	584.109	796.458	671.103	745.787	809.366
Ncan	0.900053	0	0	0	0	0
Tmem161a	896.453	920.445	998.362	1015.96	1044.1	1097.99
Armc6	207.012	264.69	194.802	175.165	185.491	183.854
Borcs8	354.621	367.183	457.583	459.809	488.586	477.608
Slc25a42	279.016	213.941	214.08	383.174	282.061	311.216
Snx9	700.241	801.036	750.801	666.724	779.252	702.546
Ranbp3	1474.29	1563.26	1409.27	1458.25	1512.61	1482.13
Ndufa11	1197.97	1225.93	1319.99	1454.97	1557.55	1627.98
Bmp8b	0.900053	0.995075	1.0146	0	0	0
Nr2f6	1470.69	1705.56	1236.79	1405.7	1323.29	1431.8
Use1	2328.44	2659.84	3079.3	2917.6	3335.96	3292.93
Ocel1	219.613	266.68	203.934	210.199	251.464	232.128
Dyrk1b	337.52	314.444	297.277	389.743	403.49	413.927
Braf	929.755	796.06	1009.52	985.306	859.568	759.038
Ndufb2	652.538	735.361	803.56	926.187	950.401	1004.52
Hltf	945.056	873.676	849.217	849.552	807.936	755.956
Prpf6	1484.19	1338.38	1473.19	1457.16	1810.92	1650.57
Rgs19	447.326	506.493	372.357	395.217	337.517	329.704
Rgs20	1.80011	3.9803	2.02919	1.09478	0.956138	1.02711
Abhd3	1753.3	1340.37	1956.14	2877.09	2827.3	2976.58
Snrpd1	1571.49	1913.53	1744.09	1696.92	1844.39	1886.81
Tchp	183.611	173.143	154.219	118.237	158.719	132.498
Tiam1	1244.77	1250.81	1088.66	1291.85	1237.24	1247.94
Tsc2	1080.06	969.204	1144.46	977.642	1095.73	1041.49
Rpl3l	0	1.99015	1.0146	3.28435	4.78069	1.02711
Slc9a3r2	978.358	1045.82	1035.9	1359.72	1127.29	1222.27
Puf60	2960.27	3254.89	3150.32	3175.97	3465.04	3314.5
Golga2	1743.4	1778.2	2026.15	1791.07	1947.65	1895.03
Uck1	1025.16	1163.24	1057.21	1077.27	1080.44	1090.8
Scin	23.4014	19.9015	32.4671	27.3696	8.60524	15.4067
Ikzf4	60.3036	41.7932	40.5838	54.7392	30.5964	48.2744
Mien1	1053.96	1231.9	1352.46	1460.44	1611.09	1608.46
Pon1	4.50027	0	0	30.654	1.91228	1.02711
Axl	1960.32	1538.39	1317.96	1232.73	982.91	1027.11
Tgfb1	744.344	793.075	665.575	641.543	745.787	738.495
Ccdc97	774.946	833.873	711.232	764.159	794.55	825.8
Zfp40	224.113	221.902	205.963	229.905	215.131	188.989
Akap8l	473.428	470.671	527.59	493.748	621.489	488.907
Shh	2116.92	1497.59	1122.14	2741.34	2195.29	2208.3
Pdcd2l	441.026	509.479	462.656	469.662	521.095	456.039
Gtf2f1	1422.98	1703.57	1474.21	1217.4	1482.01	1412.28
Clpp	1787.51	2057.82	2090.07	2168.77	2304.29	2222.68
Alkbh7	811.848	844.819	929.37	895.533	974.304	1009.65
Pspn	17.101	12.936	25.3649	9.85306	15.2982	13.3525
Dennd1c	18.0011	11.9409	12.1751	20.8009	9.56138	16.4338
Med6	421.225	482.612	396.707	487.179	474.244	466.31
Prkd1	351.921	332.355	484.977	486.084	473.288	422.144
Lcp2	147.609	126.375	94.3574	122.616	119.517	102.711
Cse1l	2051.22	1976.22	2100.21	1841.43	1888.37	1850.86
Naa20	755.145	872.681	754.859	813.425	759.173	793.96
Prkra	578.734	589.085	571.217	625.122	673.121	690.221
Fkbp7	525.631	532.365	698.042	894.439	790.726	949.054
Plekha3	1705.6	1799.1	1761.34	1630.13	1691.41	1641.33
Ykt6	2152.03	2552.37	2351.83	1874.27	1969.64	1958.71
Baz1b	2759.56	2886.71	3022.48	2582.6	2538.55	2421.94
Pex6	990.958	1033.88	1161.71	1216.31	1365.36	1263.35
Mrpl2	1275.38	1268.72	1468.12	1515.18	1742.08	1639.27
Mea1	901.853	1052.79	1071.41	1003.92	1162.66	1264.38
Gnmt	7.20042	7.9606	3.04379	3.28435	6.69296	4.10846
Grin2d	30.6018	18.9064	14.2043	36.1279	20.0789	10.2711
Kdelr1	2410.34	2443.91	2887.54	3371.94	3200.19	3480.89
Tmem143	479.728	419.922	591.509	708.325	740.051	732.333
Pdxk-ps	2.70016	0	2.02919	1.09478	1.91228	2.05423
Ggct	92.7055	135.33	85.226	84.2984	89.8769	77.0336
Jag2	112.507	125.38	97.4012	66.7818	68.8419	53.41
Btbd6	349.221	345.291	326.7	362.374	411.139	437.551
Nudt14	251.115	267.675	319.598	419.302	362.376	455.012
Epdr1	529.231	440.818	536.721	652.491	583.244	628.594
Flii	1984.62	1985.18	2049.48	1758.22	2071.95	1976.17
Top3a	277.216	264.69	256.693	223.336	261.026	278.348
Atg4d	569.734	633.863	621.947	557.245	564.121	680.977
Qtrt1	199.812	207.971	174.51	178.45	159.675	158.176
Plin4	306.918	182.099	184.656	428.061	351.859	311.216
Hdgfl2	1181.77	1024.93	1035.9	1229.44	1440.9	1281.84
Chaf1a	174.61	147.271	145.087	174.071	174.017	161.257
Adprh	1738.9	1986.17	1768.44	1685.97	2063.35	1972.06
Tmem39a	645.338	633.863	662.531	724.747	623.402	785.743
Timmdc1	641.738	784.119	734.567	720.368	757.261	901.807
Pla1a	478.828	567.193	358.152	239.758	282.061	334.839
Mcm2	972.057	822.927	999.377	965.6	1046.01	1041.49
Tpra1	1693.9	1650.83	1659.88	2010.02	1992.59	1922.76
Nab1	2829.77	3354.4	3338.02	2243.21	2596.87	2314.09
Adgre5	622.837	542.316	579.334	622.932	652.086	630.648
Il17ra	327.619	384.099	298.291	193.777	263.894	231.101
Lamb1	3015.18	2710.59	3950.84	4068.22	4136.25	3920.5
Kcnn1	39.6023	41.7932	39.5692	35.0331	48.763	49.3015
Arrdc2	28.8017	32.8375	27.3941	19.7061	41.1139	39.0304
Ppp1r17	72.0042	24.8769	5.07298	4.37914	7.6491	3.08134
Cd36	2161.03	2107.57	2876.38	2966.86	3217.4	2467.13
Map2k7	826.249	829.893	835.012	790.434	801.243	850.451
Timm44	1579.59	1608.04	1650.75	1404.61	1691.41	1661.87
Ap2a2	1640.8	1414	1523.92	1657.5	1546.07	1663.93
Pnkp	909.954	929.401	914.151	805.761	906.419	870.993
Med25	1475.19	1489.63	1561.46	1621.38	1531.73	1546.83
Bcam	968.457	710.484	906.034	1222.87	976.217	1007.6
Clptm1	3879.23	3849.95	4123.32	4194.12	4295.93	4454.6
Relb	862.251	799.046	722.392	976.547	953.269	959.325
Tomm40	1923.41	2148.37	1721.77	1589.63	1839.61	1815.94
Apoe	4123.14	3178.27	3920.4	8026.96	6648.98	7282.24
Apoc2	0	0.995075	0	0	0	0
Hbp1	2080.92	2113.54	2251.39	2573.84	2583.48	2618.11
Prkar2b	10261.5	9281.07	12301	13064.1	10668.6	12595.5
Cdkn1b	787.546	726.405	806.604	1136.39	914.068	1044.58
Klf4	194.411	183.094	151.175	164.218	87.9647	232.128
Ap1m1	741.644	751.282	640.21	599.942	616.709	553.615
Rab8a	1596.69	1774.22	1591.9	1671.74	1721.05	1770.75
Hmgn2	1516.59	1609.04	1708.58	1497.66	1888.37	1685.49
Fam32a	1889.21	2332.46	2195.58	2093.23	2155.13	2131.26
Elf3	1.80011	0	0	1.09478	0	0
Cyp2c29	0	0	0	2.18957	0	0
Stard3nl	722.743	763.223	635.137	744.453	645.393	700.492
Stk11	2285.23	2600.13	2467.5	2155.63	2390.34	2476.37
Efna2	145.809	157.222	96.3866	165.312	163.5	249.589
Atp5d	3906.23	5229.12	4924.85	4346.29	4758.7	5111.95
Ppp5c	1286.18	1310.51	1326.08	1255.72	1246.8	1313.68
Cdk12	639.038	670.681	622.962	537.539	549.779	461.174
Lipe	1518.39	1611.03	1636.54	1464.82	1415.08	1566.35
Pafah1b2	3777.52	3918.61	4075.63	3712.41	3642.88	3577.44
Tbc1d8	142.208	85.5765	76.0947	144.512	159.675	138.66
Cnot11	830.749	855.765	733.553	855.026	857.655	815.529
Slc2a3	185.411	113.439	101.46	141.227	111.868	178.718
Foxj2	569.734	539.331	487.006	671.103	578.463	595.726
Sri	1647.1	1554.31	1787.72	1908.21	2032.75	2061.42
Dgcr2	1316.78	1400.07	1351.44	1280.9	1438.03	1335.25
Irf3	942.356	1085.63	999.377	996.254	1073.74	894.617
Bcl2l12	241.214	249.764	199.875	234.284	214.175	244.453
Zfp959	157.509	144.286	179.583	187.208	149.157	142.769
Mpnd	1607.49	1640.88	1868.89	1929.01	2100.63	2090.18
Sh3gl1	649.838	648.789	583.392	784.96	692.244	805.258
Ebi3	69.3041	157.222	30.4379	18.6113	11.4737	10.2711
Yju2	199.812	223.892	214.08	123.711	163.5	144.823
Ranbp2	3199.69	3223.05	3752.99	2647.19	2596.87	2488.7
Edar	0	0	1.0146	1.09478	0	0
Grk5	952.256	1260.76	856.319	973.263	918.848	1075.39
Dvl3	247.515	251.754	257.707	176.26	195.052	206.45
Abcf3	1431.98	1494.6	1506.67	1184.56	1358.67	1392.77
Eif2b5	1737.1	1788.15	1750.18	1591.82	1747.82	1832.37
Cyth2	1153.87	1233.89	1150.55	1302.79	1444.72	1524.24
Sult2b1	41.4024	39.803	56.8174	54.7392	73.6226	70.8709
Car11	41.4024	14.9261	16.2335	26.2748	17.2105	20.5423
Dlgap1	1001.76	899.548	1646.69	1823.91	2340.63	2262.73
Plag1	61.2036	45.7735	80.1531	65.687	59.2805	42.1117
Hck	393.323	483.607	260.751	133.564	156.807	142.769
Mrpl4	1416.68	1475.7	1535.08	1695.82	1756.42	1892.97
Keap1	1814.51	1813.03	1658.86	1597.29	1690.45	1720.42
Ap1m2	1.80011	0	0	0	0	2.05423
Glg1	4714.48	3725.56	5531.58	6415.43	6922.44	6905.29
Atp8b3	13.5008	10.9458	13.1897	5.47392	15.2982	11.2983
Btbd2	1431.98	1431.91	1359.56	1696.92	1703.84	1729.66
Csnk1g2	2352.74	2389.18	2755.64	2617.63	2727.86	2691.04
Abhd17a	1489.59	1795.12	1696.4	1819.53	1876.9	1912.49
Mob3a	433.826	392.06	431.203	331.72	318.394	331.758
Cacnb3	196.212	223.892	182.627	145.606	152.982	171.528
Ccdc65	9.00053	4.97538	3.04379	4.37914	10.5175	4.10846
Fkbp11	157.509	183.094	203.934	190.492	181.666	217.748
Ddx23	1794.71	1816.01	1823.23	1609.33	1775.55	1694.74
Pld3	1836.11	1590.13	1721.77	2292.48	2383.65	2322.31
Grik5	300.618	256.729	304.379	340.478	331.78	330.731
Cd79a	12.6007	5.97045	11.1606	15.327	7.6491	17.4609
Rabac1	2578.65	2421.02	3072.2	3315.01	3470.78	3643.18
Etv3	564.333	518.434	541.794	484.989	509.621	491.988
Prkcsh	2044.02	2102.59	2219.94	1987.03	2615.99	2313.06
Elavl3	38.7023	5.97045	1.0146	3.28435	6.69296	4.10846
Rab3b	275.416	99.5075	27.3941	47.0757	35.3771	11.2983
St8sia6	33.302	17.9114	39.5692	25.18	11.4737	4.10846
Fcgrt	2003.52	1717.5	2528.37	3409.16	3341.7	3545.6
Nosip	1108.87	1236.88	1201.28	1259	1362.5	1311.63
Pih1d1	653.439	739.341	752.83	776.202	902.594	881.264
Rps11	6753.1	7633.22	8124.88	8861.18	10035.6	10087.3
Supt5	4682.98	5069.91	5756.82	3643.44	4833.28	4927.07
Dll3	2.70016	5.97045	4.05838	5.47392	7.6491	2.05423
Paf1	1285.28	1210.01	1298.68	1152.81	1365.36	1297.25
Timm50	1012.56	1235.88	1201.28	1129.82	1236.29	1284.92
Med29	218.713	241.803	219.153	198.156	221.824	222.884
Bicd1	190.811	121.399	130.883	164.218	111.868	116.064
Ncstn	2304.14	2064.78	2430.97	2454.51	2461.1	2498.97
Pex19	2036.82	2039.9	2576.06	2342.84	2332.02	2414.75
Phyhip	25.2015	12.936	5.07298	6.5687	2.86841	4.10846
Crhr2	0	0	0	4.37914	0	0
Inmt	18.0011	19.9015	18.2627	97.4358	47.8069	38.0032
Cyp4f18	51.303	33.8326	68.9925	114.952	105.175	100.657
Impdh1	756.945	776.159	858.348	752.117	846.182	761.092
Psg18	0	0	0	0	0	0
Dusp3	4240.15	4513.66	4925.86	3900.72	4283.5	4402.21
Prodh	58.5035	52.739	59.8611	43.7914	43.0262	39.0304
Ess2	315.019	326.385	349.021	327.34	329.867	310.189
Slc25a1	2201.53	1985.18	2664.33	2473.12	2744.12	2440.42
Dgcr6	94.5056	89.5568	128.854	123.711	125.254	130.444
Ddr1	1260.07	1147.32	1268.24	1503.14	1494.44	1584.84
Ier3	196.212	170.158	149.146	317.487	173.061	353.327
Fosb	12.6007	13.9311	44.6422	49.2653	46.8507	57.5184
Klc4	880.252	873.676	1040.98	1006.11	1106.25	1096.96
Ercc1	294.317	325.39	296.262	244.137	283.017	318.406
Cyp17a1	28.8017	21.8917	30.4379	30.654	36.3332	42.1117
As3mt	1306.88	1146.33	1581.75	1819.53	2007.89	2137.43
Homer3	483.329	482.612	534.692	561.624	488.586	515.611
Crtc1	718.242	650.779	604.699	657.965	638.7	647.082
Rnf215	436.526	508.484	465.699	483.895	491.455	502.259
Sec14l2	13.5008	8.95568	5.07298	15.327	14.3421	9.24403
Aven	251.115	286.582	253.649	215.672	216.087	224.938
Cp	1974.72	2111.55	1494.5	1181.27	969.524	1016.84
Crot	1305.98	1418.98	1477.25	1510.8	1635.95	1604.35
Rps6ka1	461.727	442.809	456.568	426.966	522.051	447.822
Calb2	1.80011	0	0	0	0	0
Snrnp200	1950.42	1902.58	2109.34	1968.42	2132.19	1999.79
Ciao1	1498.59	1709.54	1647.7	1703.48	1878.81	1922.76
Has1	2.70016	2.98523	1.0146	0	0	0
Tmem179b	677.74	717.449	698.042	886.775	892.076	915.159
Insig2	1239.37	1232.9	1423.48	1387.09	1389.27	1398.93
Kpna6	2369.84	2589.19	2241.24	2169.86	2186.69	2084.02
Man1a	1270.87	1152.3	964.88	620.743	765.866	612.16
Itpkc	243.914	229.862	260.751	283.549	221.824	252.67
Coq8b	659.739	819.942	629.049	479.515	547.867	514.584
Brd8	909.954	931.391	839.071	848.458	915.024	856.614
Kif20a	74.7044	108.463	99.4304	73.3505	69.798	71.898
Farsa	1042.26	1093.59	1079.53	938.23	1076.61	963.433
Gcdh	917.154	721.43	1034.89	1295.13	1317.56	1323.95
Mast2	936.955	887.607	902.99	920.713	892.076	839.153
Dnase2a	340.22	259.715	312.495	426.966	388.192	412.9
Rad23a	1800.11	1950.35	2017.02	1728.66	1912.28	1997.74
Calr	12748.4	12494.2	12885.4	14281.5	14037.1	15318.4
Syce2	48.6029	41.7932	60.8757	88.6775	74.5787	112.983
Nfat5	5531.73	4311.66	4600.18	6279.68	4490.98	3965.69
Nob1	542.732	655.755	560.057	488.274	524.92	485.825
Nqo1	50.403	40.7981	49.7152	67.8766	59.2805	67.7896
Ppfia3	28.8017	16.9163	17.2481	9.85306	19.1228	9.24403
Gys1	362.721	340.316	341.919	387.554	368.113	417.009
Ruvbl2	649.838	715.459	586.436	648.112	652.086	612.16
Lin7b	43.2025	20.8966	49.7152	55.834	60.2367	64.7082
Bax	987.358	1188.12	942.559	888.965	962.831	1056.9
Il7r	22.5013	22.8867	10.146	5.47392	4.78069	2.05423
Tfam	1438.28	1825.96	1604.08	1665.17	1598.66	1556.08
Zfp81	378.922	433.853	423.086	445.577	321.262	365.653
Efnb3	12.6007	10.9458	12.1751	7.66349	4.78069	4.10846
Mmd	576.934	381.114	662.531	887.87	717.103	686.113
Hlf	485.129	206.976	362.211	510.169	331.78	365.653
Fam162a	971.157	1017.96	1097.79	1278.71	1305.13	1393.79
Rpl8	11726.8	14238.5	13558	13345.4	14523.7	15170.5
Grm3	0	0	0	3.28435	0	0
Ssbp2	455.427	400.02	403.809	414.923	412.095	437.551
Fancl	244.814	234.838	226.255	272.601	261.982	247.535
Brinp2	5.40032	0.995075	3.04379	4.37914	2.86841	2.05423
Gstm5	701.141	593.065	741.669	999.538	1019.24	895.644
Gstm7	1044.96	926.415	1429.57	1358.63	1704.79	1540.67
Gstm3	11.7007	3.9803	10.146	13.1374	10.5175	11.2983
Stat3	2089.92	2832.98	1810.04	1356.44	1519.3	1522.18
Stat5a	486.929	462.71	355.108	621.837	596.63	617.296
Cavin1	6038.46	6867.02	6702.42	6326.76	7198.76	6747.12
Map3k11	1193.47	1289.62	1220.56	1077.27	1138.76	1108.26
Akt2	2268.13	2343.4	2667.37	2376.78	2636.07	2637.63
Dnaja3	2884.67	3208.12	3084.37	2920.88	3015.66	3139.89
Hmox2	1423.88	1403.06	1639.59	1419.93	1540.34	1389.69
Cdip1	2410.34	2386.19	2448.22	2682.22	2354.97	2522.59
Map3k20	549.032	531.37	457.583	411.639	434.087	417.009
Cwc15	2019.72	2111.55	2291.97	2340.65	2684.83	2654.06
Col5a3	450.027	861.735	407.867	418.208	708.498	610.106
Dnmt1	1215.97	1444.85	1092.72	917.429	1068.96	1021.98
Ppan	546.332	626.898	495.123	405.07	465.639	456.039
Angptl2	442.826	157.222	508.312	810.14	710.41	721.034
Cacna1e	26.1015	4.97538	3.04379	2.18957	4.78069	4.10846
Cacna1b	45.0027	23.8818	3.04379	6.5687	5.73683	3.08134
Trmt10a	235.814	314.444	225.24	145.606	183.578	218.775
Etv1	584.134	524.405	709.202	621.837	618.621	534.1
Kifc2	90.9054	64.6799	100.445	87.5827	89.8769	114.01
Psap	15350.4	13416.6	15878.4	17839.5	18843.6	19598.4
Ikbkg	2431.04	2769.3	2508.08	2322.04	2402.77	2453.78
Pax2	0	0	0	0	0	0
Wars2	273.616	334.345	294.233	264.938	218.956	216.721
Atn1	166.51	132.345	153.204	246.326	232.341	226.992
Phb2	3557.91	3951.44	3524.71	3369.75	3611.33	3672.96
Ptpn6	368.122	339.321	238.43	177.355	194.096	229.047
Eno2	144.008	100.503	87.2552	79.9192	83.184	127.362
Emg1	1533.69	1951.34	1510.73	1497.66	1492.53	1418.45
Lpcat3	1602.09	1822.98	1504.65	1357.53	1375.88	1429.74
Atp6v1f	1495.89	1575.2	1821.2	1979.37	2176.17	2223.7
Il12b	1.80011	1.99015	1.0146	0	0	2.05423
Clcn5	709.242	788.1	696.013	721.463	779.252	737.468
Clcn3	1714.6	1521.47	2422.85	2720.54	2726.9	2508.21
Hif3a	39.6023	24.8769	35.5108	21.8957	5.73683	34.9219
Gpx6	0	0	0	0	0	0
Gpx5	0	0	0	0	0	0
Pde1c	1.80011	0	0	1.09478	3.82455	1.02711
Utp20	757.845	765.213	726.45	527.686	601.411	521.774
Spic	46.8028	67.6651	31.4525	44.8861	31.5525	21.5694
9330159F19Rik	58.5035	20.8966	14.2043	51.4549	31.5525	17.4609
Cul3	3132.18	3134.49	3492.24	2980	3163.86	2962.2
Sst	0.900053	0.995075	2.02919	1.09478	0.956138	24.6507
Il11	6.30037	6.96553	4.05838	5.47392	0.956138	1.02711
Large1	790.247	782.129	660.502	407.26	469.464	473.5
Ddx56	1226.77	1411.02	1226.65	929.472	1160.75	1066.14
Tmed4	1882.91	1811.04	2046.44	2382.25	2375.05	2644.82
Col26a1	3.60021	5.97045	1.0146	6.5687	2.86841	9.24403
Bid	223.213	230.858	174.51	151.08	152.982	141.742
Ralb	1885.61	1938.41	1933.82	1937.77	2005.98	2046.01
Ppp1cc	1026.06	1147.32	1058.22	949.178	899.726	997.328
Dnajb11	1881.11	1906.56	1951.07	1802.01	1814.75	1898.11
Tbccd1	482.428	499.528	444.393	489.368	494.323	546.425
Clec11a	66.6039	63.6848	77.1093	113.858	87.9647	82.1692
Zfp324	353.721	356.237	489.035	411.639	453.209	361.544
Gab2	365.422	375.143	317.568	319.677	316.482	310.189
Coro1c	1414.88	1399.08	1302.74	1229.44	1237.24	1239.73
Tax1bp1	6442.58	6524.71	6543.13	6357.41	6579.18	6353.73
Psg17	0	0.995075	1.0146	0	0.956138	0
Psg19	0	0	0	0	0	0
Ctse	2.70016	0.995075	4.05838	2.18957	0	1.02711
Ndrg2	4237.45	4026.08	4998.91	5054.62	5792.28	5785.74
Mettl17	189.911	200.01	207.992	264.938	261.026	275.267
Arhgef40	757.845	679.637	677.75	754.306	711.366	712.817
Pnpla6	649.838	606.996	672.677	650.302	697.024	640.919
Mcoln1	641.738	619.932	776.166	790.434	778.296	805.258
Arhgef18	838.849	783.124	772.107	841.889	852.875	803.204
Pkn2	2166.43	2324.5	2386.33	2324.23	2139.84	2087.1
Cd33	34.202	35.8227	58.8465	168.597	144.377	146.877
Etfb	541.832	561.223	585.422	892.249	830.884	875.102
Nkg7	30.6018	18.9064	22.3211	25.18	6.69296	13.3525
NA	0	0	0	0	0	0
Stxbp2	805.548	743.321	868.494	930.566	1022.11	902.834
Pcp2	0	0	0	0	0	0
Sgce	1377.98	1214.99	1511.75	2096.51	2010.76	2025.47
Chn2	133.208	145.281	134.941	177.355	164.456	164.338
Wwox	504.03	426.887	511.356	663.439	683.638	674.814
Slbp	711.042	798.051	972.997	642.638	723.796	634.757
Tyr	0	0	0	0	0	0
Ghrhr	0	0	0	0	0	0
Aqp1	543.632	363.203	759.932	766.349	207.482	174.609
Arid3b	58.5035	51.7439	78.1239	47.0757	54.4998	51.3557
Cnn2	612.036	772.179	717.319	551.771	564.121	464.256
Polr2e	1467.99	1709.54	1642.63	1643.27	1732.52	1877.57
Abca13	0	1.99015	0	0	1.91228	0
Myo9b	1205.17	1325.44	1011.55	880.206	807.936	826.827
Hdac9	18.9011	12.936	31.4525	37.2227	26.7719	28.7592
Ly9	62.1037	40.7981	39.5692	42.6966	27.728	57.5184
Cd244a	40.5024	55.7242	46.6714	24.0853	18.1666	26.705
Adgre1	337.52	283.597	355.108	258.369	260.069	294.782
Mtfp1	311.418	298.523	294.233	297.781	329.867	360.517
Rab23	298.818	294.542	230.313	272.601	255.289	316.351
Rab11a	2939.57	3046.92	3599.79	3714.6	3880.01	4051.97
Eif2b2	1067.46	1178.17	1100.84	934.946	1163.62	1140.1
Dlst	4133.94	4342.51	4702.65	4189.74	4457.51	4385.78
Pgf	26.1015	26.867	20.2919	24.0853	8.60524	12.3254
Ulk2	1287.98	1163.24	1544.21	1525.03	1499.22	1472.88
Ccl24	0.900053	0.995075	0	1.09478	0	0
Dgkq	366.322	371.163	384.532	284.644	271.543	330.731
Tmed11	0	0	0	0	0	0
Grap	260.115	230.858	239.445	348.141	277.28	299.917
Pou1f1	0	0	0	0	0	1.02711
Chmp2b	1858.61	2016.02	2124.56	2466.55	2225.89	2094.29
Plod3	1172.77	1433.9	1072.43	944.799	865.305	954.189
Ap1s1	1672.3	2009.06	1780.62	1614.81	1786.07	1749.18
Mapk13	1359.98	1364.25	1910.48	1345.49	2286.13	1962.82
Srpk1	998.159	1066.72	977.056	799.192	868.173	815.529
Pax3	0	0	0	0	0	0
Lbr	540.932	513.459	545.852	490.463	426.437	455.012
Crabp2	1.80011	2.98523	2.02919	0	0	0
Nes	721.843	665.706	967.924	395.217	525.876	231.101
Bcan	2039.52	1586.15	1871.93	2330.8	2353.05	2260.68
Hapln2	0	0.995075	0	0	0	0
Prcc	772.246	884.622	801.531	902.102	912.155	858.668
Rrnad1	353.721	343.301	350.035	313.108	329.867	301.972
Hdgf	4286.95	4734.57	4638.73	4274.04	4397.28	4572.71
Slc25a18	8.10048	0.995075	10.146	42.6966	25.8157	42.1117
Thop1	916.254	1104.53	1030.83	769.633	951.357	940.837
Apba3	658.839	788.1	676.735	652.491	679.814	697.411
Matk	3.60021	2.98523	8.11676	9.85306	5.73683	5.13557
Pias4	450.027	445.794	414.97	457.62	516.314	543.344
Map2k1	3242.89	4102.7	2951.46	1997.98	2220.15	2295.6
Sgta	2676.76	3059.86	3468.9	2510.34	3000.36	2869.76
Nmrk2	0	0	0	0	0	0
Tmem242	1732.6	1840.89	2090.07	2375.68	2579.66	2788.62
Dtx2	246.615	335.34	223.211	227.715	227.561	202.342
Zp3	0	0	0	1.09478	0	0
Hspb1	826.249	774.169	766.02	1140.77	1398.83	1370.17
Rasa4	611.136	590.08	410.911	363.468	358.552	328.677
Syt5	46.8028	15.9212	3.04379	5.47392	8.60524	2.05423
Hnrnpa2b1	14813.1	14264.4	15958.6	13063	16296.4	15162.3
Fxyd4	0	0	0	0	0	0
Ccdc130	180.911	179.114	158.277	172.976	158.719	190.016
Mri1	713.742	834.868	705.144	790.434	823.235	810.393
Prkacb	3843.23	3510.63	4036.06	4141.57	4118.08	4106.4
Sgsh	706.542	682.622	694.998	823.278	803.156	874.074
Chd5	176.41	52.739	18.2627	22.9905	17.2105	8.21692
Cstb	3359	3759.4	3859.52	3065.4	3675.39	3722.26
Sh2b2	99.9059	126.375	88.2698	55.834	50.6753	48.2744
Pex5	1262.77	1402.06	1657.85	1246.96	1294.61	1173.99
Jkamp	1552.59	1512.51	1814.1	1936.67	2005.02	2084.02
Cd44	2274.43	3258.87	2250.37	1416.65	1825.27	1608.46
Slc1a2	0	0	0	1.09478	0	0
Eif2ak4	488.729	463.705	441.349	437.914	440.779	453.985
Wdr1	2842.37	3379.28	2721.15	2131.54	2369.31	2046.01
Slc2a9	80.1047	79.606	76.0947	99.6254	96.5699	117.091
Wisp1	107.106	99.5075	112.62	116.047	137.684	136.606
Ndrg1	1233.97	854.77	1161.71	1177.99	1152.15	1263.35
4930550C14Rik	121.507	115.429	130.883	142.322	164.456	169.474
Man2b1	701.141	615.952	743.699	1059.75	974.304	1111.34
Klf5	17.101	7.9606	11.1606	7.66349	3.82455	2.05423
Wdr83	394.223	449.774	414.97	431.345	467.551	457.066
Prdx2	8998.73	11359.8	10247.4	10915	11596	12237
Polr2a	2154.73	1904.57	1800.91	1861.13	2197.2	1886.81
Shbg	0.900053	0	0	0	0	0
Senp3	1628.2	1696.6	1688.29	1417.75	1593.88	1494.45
Corin	1.80011	0	0	1.09478	0	3.08134
Plekha8	452.727	469.676	488.02	401.786	428.35	441.659
G6pc2	0	0	0	0	0	0
Spc25	45.0027	39.803	61.8903	39.4122	32.5087	31.8406
Dnah2	15.3009	4.97538	9.13136	14.2322	9.56138	12.3254
Ripk4	8.10048	1.99015	0	1.09478	0	0
Ufd1	1910.81	1891.64	1987.59	1809.68	1833.87	1944.33
Zfp287	90.9054	115.429	92.3282	90.8671	70.7542	57.5184
Prlr	3328.4	3062.84	4146.65	3886.48	3963.19	4162.9
Letm1	1799.21	1703.57	2016	1619.19	2066.21	2023.42
Ubqln1	3286.09	3421.07	3454.7	2860.67	2947.77	3010.47
Fgfr4	482.428	528.385	439.32	513.454	392.016	442.686
Cadm3	28.8017	10.9458	3.04379	10.9478	12.4298	7.1898
Fcer1a	4.50027	1.99015	0	1.09478	0	0
Txn2	11084.2	12267.3	13541.8	12632.7	13464.3	13781.8
Casp14	0	0	0	0	0	0
Slc1a6	2.70016	0.995075	0	4.37914	1.91228	4.10846
Slc1a3	80.1047	38.8079	52.759	154.365	21.035	24.6507
Crbn	1170.07	1330.42	1244.91	1026.91	1162.66	1072.31
Il5ra	0	0.995075	0	1.09478	0	0
Msh6	421.225	462.71	340.904	413.828	392.973	445.768
Fbxo11	1773.1	1794.12	1770.47	1870.99	1774.59	1788.21
Mlxipl	163.81	138.315	133.927	185.019	141.508	128.389
Tbl2	531.931	641.824	568.174	493.748	521.095	613.187
Bud23	485.129	572.168	533.677	535.349	558.384	585.455
Nid1	1152.07	1033.88	1192.15	1398.04	1208.56	1158.59
Mcm5	298.818	228.867	231.328	252.895	265.806	226.992
Hmox1	3080.88	3323.55	2804.34	3573.38	3498.51	3533.27
Mprip	5079	4623.12	5243.43	5244.02	4885.86	4869.55
Cic	1478.79	1560.28	1555.38	1260.1	1184.65	1059.98
Pafah1b3	306.018	373.153	353.079	372.227	390.104	370.788
Il27ra	41.4024	50.7488	43.6276	27.3696	41.1139	38.0032
Prkaca	3082.68	3174.29	3104.66	3940.13	4020.56	4092.02
Asf1b	42.3025	38.8079	40.5838	50.3601	31.5525	23.6236
Myl10	0	0.995075	0	0	0	0
Ddx39	471.628	678.641	418.013	309.824	335.604	291.701
Dnajb1	792.047	914.474	768.049	764.159	818.454	1080.52
Msh4	1.80011	1.99015	1.0146	0	0	0
Usp40	673.24	705.509	645.283	533.16	503.885	592.645
Evx1	0	0	0	0	0	0
Kbtbd4	38.7023	43.7833	52.759	35.0331	31.5525	45.193
Celf1	274.516	371.163	246.547	170.786	172.105	149.959
Ndufs3	1098.96	1135.38	1218.53	1230.54	1373.01	1342.44
Por	4447.16	4212.15	5229.23	3582.13	3936.42	3935.9
Igf1r	2418.44	2613.07	3529.78	3093.86	3700.25	3286.77
Insr	3010.68	2808.1	3525.72	3414.63	3332.14	3131.67
Fcer2a	7.20042	0	2.02919	5.47392	7.6491	7.1898
Cyp2a5	0	0	0	1.09478	0	0
Atp4a	128.708	113.439	130.883	175.165	184.535	188.989
Trim28	2979.18	2831.98	2745.5	2776.37	3058.68	2588.33
Ube2m	2143.93	2479.73	2222.98	2169.86	2352.1	2474.32
Adcy9	784.846	871.686	722.392	595.563	611.928	650.164
Mef2c	1548.99	1444.85	1433.62	1691.44	1618.74	1660.84
Ctr9	959.457	900.543	923.282	835.32	1041.23	929.539
Eif4g2	23957.6	27244.2	26435.3	20324.7	21211.9	20419
Mrvi1	170.11	83.5863	164.364	153.27	73.6226	79.0878
Pcyt1a	2221.33	2389.18	2480.69	1989.22	2049	1988.49
Zfp592	758.745	768.198	752.83	742.264	764.91	710.763
Psmd4	3414.8	3579.29	3529.78	3350.04	3978.49	3745.89
Tmod4	3.60021	2.98523	3.04379	0	0.956138	3.08134
Insrr	35.1021	14.9261	5.07298	0	0	0
Cabp5	0	0	0	0	0	0
Snx6	1933.31	2166.28	2000.78	1961.85	1965.82	2015.2
Mthfd2	561.633	1386.14	435.262	526.591	374.806	382.087
Kit	203.412	148.266	102.474	89.7723	78.4033	65.7353
Tomm40l	1159.27	1374.2	1380.86	1262.29	1201.87	1301.35
Nr1i3	2.70016	0	3.04379	3.28435	0.956138	1.02711
Apoa2	11.7007	15.9212	9.13136	16.4218	16.2543	8.21692
Pan2	374.422	383.104	318.583	371.132	362.376	311.216
Cs	4503.87	4272.85	4866	4642.98	5012.07	4877.77
Ampd3	395.123	219.912	165.379	282.454	245.727	228.019
Bcas2	1252.87	1096.57	1333.18	1313.74	1502.09	1479.04
Sh2d1a	2.70016	5.97045	4.05838	0	0.956138	3.08134
Ctcf	1575.09	1539.38	1493.48	1475.77	1598.66	1461.58
Pard6a	116.107	107.468	108.562	117.142	118.561	133.525
Agrp	27.0016	25.872	3.04379	4.37914	10.5175	0
Pvalb	0	0	0	0	0	0
Tfap4	81.9048	105.478	81.1676	100.72	111.868	71.898
Ranbp1	1040.46	1233.89	947.632	757.591	884.427	923.376
Cd247	5.40032	9.95075	6.08757	4.37914	3.82455	8.21692
Rfx5	543.632	474.651	554.984	585.709	632.963	596.754
Psmb4	4423.76	4987.32	4883.25	4844.42	5148.8	5224.93
Mmp8	9.00053	52.739	6.08757	1.09478	0	0
Slc30a4	55.8033	63.6848	53.7736	27.3696	33.4648	19.5152
Sqor	985.558	888.602	1193.16	1380.52	1483.93	1438.99
Bloc1s6	854.15	880.642	816.749	755.401	792.638	782.661
Metap1	1300.58	1376.19	1391.01	1118.87	1123.46	1107.23
Gpr108	1951.32	1902.58	2157.03	2163.29	2433.37	2515.4
Tnfsf14	7.20042	7.9606	8.11676	1.09478	5.73683	2.05423
Gata6	1675.9	1470.72	1480.3	2771.99	2631.29	3593.87
Rsl1d1	2738.86	3360.37	2859.13	2447.94	2422.85	2445.56
Cnga2	1.80011	1.99015	2.02919	4.37914	2.86841	4.10846
Apc	1400.48	1322.46	1589.87	1399.13	1291.74	1200.7
Reep5	13530.5	14651.5	16999.5	14722.7	14692	16641.3
Ergic3	3293.29	3433.01	3707.33	3805.47	4479.5	4748.35
Uqcc1	1755.1	1994.13	1954.11	1772.46	1953.39	1910.43
Spo11	0	1.99015	0	0	0	0
Ncoa2	1368.08	1360.27	1277.38	1474.67	1485.84	1199.67
Prl4a1	0	0	0	0	0	0
Trh	0	0	1.0146	0	0	0
Nr2c2	1418.48	1427.93	1357.53	1400.23	1261.15	1067.17
Nr2c1	422.125	442.809	407.867	421.492	455.122	448.849
Smpd4	607.536	607.991	596.582	601.036	615.753	609.079
Pex1	399.624	437.833	415.984	327.34	391.06	319.433
Otx1	0	0	0	0	0	0
Kctd20	1018.86	1120.46	1014.6	967.789	884.427	985.003
Itgae	8.10048	9.95075	7.10217	12.0426	6.69296	6.16269
Ctns	261.015	295.537	286.116	263.843	356.639	323.541
P2rx5	56.7033	88.5617	46.6714	100.72	83.184	112.983
Shpk	209.712	254.739	238.43	249.611	301.183	257.806
Trpv1	1.80011	0.995075	0	4.37914	0	0
Ephb3	11.7007	11.9409	8.11676	17.5165	8.60524	3.08134
Tuft1	432.926	506.493	382.503	420.397	480.937	444.741
Rcn1	2356.34	3003.14	1965.27	1644.37	1498.27	1486.23
Dnase1	0.900053	0	0	0	0	0
Trap1	3064.68	3252.9	3305.55	2608.87	3212.62	3102.91
Naa60	1628.2	1563.26	1734.96	1510.8	1653.16	1656.74
1700037C18Rik	79.2047	112.444	117.693	89.7723	118.561	92.4403
Ankrd13d	52.2031	38.8079	49.7152	43.7914	44.9385	50.3286
Tyrp1	0	0	0	0	0	0
Tpr	2494.05	2325.49	2395.46	2093.23	2283.26	2017.25
Pdc	0	0	0	0	0	0
Odr4	1788.41	1670.73	2033.25	1927.91	2138.88	2140.51
Prg4	2.70016	4.97538	6.08757	3.28435	1.91228	1.02711
Dhx34	237.614	279.616	226.255	200.345	305.008	285.538
Kptn	254.715	263.695	337.86	359.089	366.201	398.52
Napa	2737.06	2929.5	3051.9	2761.05	2965.94	3040.26
Sra1	2143.03	2434.95	2475.61	1990.32	2389.39	2319.22
Calcoco2	0.900053	1.99015	1.0146	2.18957	3.82455	1.02711
Atp5g1	1152.07	1130.41	1293.61	1518.47	1444.72	1482.13
Snf8	1118.77	1169.21	1257.08	1213.02	1240.11	1384.55
Tbcb	1410.38	1504.55	1537.11	1689.25	1780.33	1785.13
Inpp5k	990.958	887.607	1060.25	1186.75	1255.41	1239.73
Crkl	678.64	687.597	629.049	541.918	499.104	558.75
Upk3bl	0	0	0	0	0.956138	0
Eps8l1	225.013	99.5075	105.518	214.578	304.052	123.254
Clint1	2023.32	2111.55	2171.23	1765.89	1762.16	1654.68
Prss16	0	0.995075	1.0146	0	1.91228	1.02711
Cdkal1	309.618	320.414	344.963	363.468	342.297	326.622
Rhox6	0	0	0	0	0	0
5430419D17Rik	0	0	0	0	0	0
Htra1	1177.27	1172.2	1310.86	1370.67	1313.73	1668.03
Zbtb17	432.025	439.823	427.145	409.449	427.394	390.304
Clcnkb	0	0	0	0	0	0
Fam131c	102.606	93.5371	49.7152	101.815	112.824	133.525
Fblim1	384.323	341.311	339.89	294.497	370.025	331.758
Hspb7	13.5008	1.99015	6.08757	5.47392	0.956138	6.16269
Epor	1.80011	0	2.02919	13.1374	4.78069	9.24403
Ccdc159	59.4035	68.6602	95.372	85.3932	91.7892	85.2505
Mob1b	1764.1	1772.23	2111.37	1727.57	1605.36	1456.45
Atp6v1b1	0	0	0	0	0	0
Vax1	0	0	0	0	0	0
Atp6v1b2	2467.95	2143.39	1999.77	1913.68	1969.64	1971.03
Eps15l1	702.041	741.331	633.108	647.017	594.718	585.455
Tep1	396.023	429.873	506.283	395.217	412.095	413.927
Ttc5	689.441	664.71	684.852	705.041	755.349	746.712
Osgep	697.541	717.449	792.399	772.918	879.647	882.291
Aamp	3326.6	3320.57	3783.43	3851.45	4116.17	4156.73
Tmbim1	2592.15	2854.87	2963.63	3184.73	3112.23	3151.19
Arpc2	4723.48	5324.65	5073.99	4751.36	5115.34	5166.39
Kmt2b	964.857	1071.7	933.428	788.245	826.103	750.821
Zbtb32	2.70016	1.99015	1.0146	0	0	0
Etv2	0	0	0	0	0	0
Upk1a	4.50027	1.99015	4.05838	3.28435	2.86841	2.05423
Tmem147	2526.45	2672.77	2976.82	2855.2	2917.18	3122.43
Rps9	7489.34	8988.52	8606.81	8750.61	9687.59	9847.97
Tfpt	261.015	296.532	297.277	320.772	318.394	297.863
Susd2	136.808	125.38	78.1239	116.047	106.131	115.037
Ggt5	171.01	102.493	176.54	282.454	239.991	261.914
Ggt1	1.80011	3.9803	0	1.09478	0	0
Crip2	474.328	479.626	517.444	671.103	660.691	698.438
Crip1	153.909	115.429	82.1822	152.175	107.087	119.145
Cbfa2t3	519.331	349.271	348.006	655.776	467.551	891.535
Fbln1	173.71	125.38	137.985	283.549	213.219	130.444
Pgrmc1	12485.5	12289.2	15120.5	15593	18042.3	16761.5
Gcat	468.928	414.946	501.21	606.51	566.99	582.374
Tek	1253.77	1075.68	1411.3	1875.37	1794.67	1752.26
Mpl	0	0	1.0146	0	0	1.02711
Elovl1	1553.49	1726.46	1684.23	1476.86	1413.17	1558.13
Med8	741.644	947.312	771.093	641.543	662.603	725.143
Hyi	332.12	339.321	400.765	435.724	565.077	505.34
Cdc20	76.5045	98.5125	88.2698	99.6254	57.3683	66.7624
Adamts4	43.2025	161.202	28.4087	8.75827	18.1666	18.4881
Nectin4	22.5013	25.872	17.2481	15.327	11.4737	22.5965
Pfdn2	2089.02	2168.27	2420.83	2276.06	2629.38	2509.24
Rnf114	3085.38	3454.9	2912.9	2457.79	2637.98	2617.09
C330007P06Rik	1155.67	1231.9	1325.06	1230.54	1129.2	1139.07
Neurl1a	234.014	143.291	141.029	126.995	84.1401	86.2776
Srm	1508.49	1840.89	1354.49	1015.96	1141.63	1290.06
Epha2	681.34	672.671	593.538	486.084	626.27	597.781
Rbm14	305.118	443.804	309.452	301.066	363.332	337.921
Actn3	6.30037	6.96553	5.07298	1.09478	1.91228	4.10846
A530013C23Rik	24.3014	18.9064	18.2627	21.8957	23.9034	22.5965
Zdhhc24	651.638	685.607	610.787	653.586	674.077	715.899
Bbs1	297.018	230.858	246.547	286.833	292.578	301.972
Slc34a3	0	0	0	0	0	0
Ndor1	729.943	795.065	652.385	540.823	617.665	652.218
Nsmf	1024.26	1020.95	941.545	895.533	902.594	865.858
Prl7a1	0	0	0	0	0	0
Prl8a9	0	0	0	0	0	0
Pdk1	834.349	796.06	901.976	921.808	763.954	779.58
Ptbp1	3718.12	4216.13	3770.24	3157.36	2996.54	3294.98
Mvd	156.609	123.389	466.714	144.512	258.157	157.149
Cyba	594.035	585.104	483.962	586.804	452.253	626.54
Itih3	1.80011	4.97538	1.0146	2.18957	0.956138	3.08134
Tmem110	455.427	500.523	494.108	444.482	437.911	518.693
Sfmbt1	712.842	706.504	763.991	682.05	604.279	600.862
Itih1	0	0.995075	0	0	0.956138	0
Ihh	0	1.99015	0	1.09478	0	0
Prkag3	0.900053	0.995075	1.0146	1.09478	0	0
Cryba2	2.70016	0.995075	3.04379	1.09478	1.91228	6.16269
Atp7b	10.8006	13.9311	12.1751	12.0426	9.56138	19.5152
Defb2	0	0	0	0	0	0
Slc4a1	0.900053	3.9803	4.05838	1.09478	3.82455	2.05423
Rundc3a	458.127	268.67	450.48	498.127	485.718	414.954
Slc4a3	2218.63	2044.88	2490.83	2052.72	2503.17	2151.8
Cdt1	129.608	116.424	128.854	146.701	127.166	144.823
Runx1t1	13.5008	5.97045	11.1606	8.75827	8.60524	17.4609
Snai3	0	0	1.0146	0	0	1.02711
Aprt	766.845	809.991	860.377	882.396	892.076	962.406
Gtf2h1	1107.07	1169.21	1220.56	1193.31	1245.85	1112.37
Hfe	835.249	864.721	805.589	897.723	877.734	938.783
Abhd1	28.8017	41.7932	39.5692	27.3696	38.2455	19.5152
Slc5a6	461.727	308.473	453.524	463.094	525.876	584.428
Tcf23	56.7033	18.9064	72.0363	44.8861	43.0262	36.9761
Nphs1	0	0	0	0	0	0
Aplp1	405.024	167.173	205.963	175.165	231.385	210.558
Qrich1	1909.91	1895.62	1919.61	1881.93	1896.02	1849.83
P4htm	95.4056	72.6405	91.3136	147.796	103.263	110.928
Usp19	3563.31	3516.6	3267	3004.09	3262.34	3093.67
Pola1	185.411	190.059	234.372	200.345	276.324	222.884
Cdc42	15706.8	16765	17480.5	16251	16745.8	17249.4
Pknox1	550.832	687.597	554.984	504.695	501.972	507.395
D130043K22Rik	28.8017	20.8966	32.4671	31.7487	31.5525	31.8406
Gmnn	275.416	197.025	269.882	348.141	382.455	313.27
Acot13	553.533	501.518	721.377	797.003	957.094	948.027
Zfp184	64.8038	40.7981	36.5254	56.9288	61.1928	38.0032
Cyp27b1	0.900053	0.995075	3.04379	2.18957	1.91228	8.21692
Cdk4	2792.86	2849.9	2611.57	2705.21	2822.52	2825.59
B4galnt1	225.013	247.774	215.094	157.649	157.763	211.586
Mettl1	1123.27	1300.56	1122.14	914.145	999.164	1057.93
Tspan31	2967.48	3105.63	3227.43	3487.98	3534.84	3910.23
Kif5b	8681.91	9323.86	10282.9	7942.66	7721.77	8437.75
Saal1	322.219	315.439	328.729	301.066	311.701	313.27
Tph2	0	0.995075	0	0	1.91228	2.05423
Krt23	0	0	1.0146	0	0	0
Cnp	2009.82	1965.27	1856.71	2327.51	2622.69	2611.95
Ttc25	64.8038	60.6996	44.6422	59.1183	87.9647	86.2776
Sulf2	1947.71	1976.22	2057.6	2165.48	2467.79	2188.78
Sod2	5990.75	8455.16	4901.51	3146.41	3180.11	3302.17
Tmco6	164.71	179.114	201.905	208.009	251.464	176.664
Stambp	616.536	604.011	611.801	638.259	652.086	677.896
Ezh1	900.053	917.46	911.107	951.367	885.383	944.945
Hap1	1657.9	1381.16	537.736	398.501	531.613	394.412
P3h4	1187.17	1148.32	1202.3	1617	1488.71	1737.88
Ctnnb1	20235	21265.8	23539.6	20934.5	22854.6	22785.5
Eif1b	925.255	989.105	955.749	982.021	1024.02	1073.33
Klk4	0	0	0	0	0	0
Chrd	304.218	254.739	334.817	342.667	457.034	408.792
Psmd2	4765.78	5158.47	5119.65	3844.88	4982.43	4467.95
Syngr3	29.7018	5.97045	1.0146	3.28435	3.82455	1.02711
Vars	1403.18	1417.98	1163.74	937.135	1181.79	1008.63
Vwa7	4.50027	1.99015	1.0146	5.47392	2.86841	0
Hspa1l	4.50027	9.95075	6.08757	2.18957	9.56138	3.08134
Slc44a4	77.4046	89.5568	71.0217	35.0331	68.8419	61.6269
Msh5	9.90058	6.96553	12.1751	5.47392	4.78069	9.24403
Abhd16a	2003.52	2178.22	1823.23	1587.44	1603.44	1711.17
Neu1	792.047	823.923	902.99	886.775	914.068	945.972
Ddah2	433.826	455.745	506.283	597.752	591.849	554.642
Clic1	3346.4	3901.69	3265.98	3325.95	3307.28	3532.25
Lsm2	386.123	454.749	351.05	385.364	395.841	381.059
Pole	30.6018	15.9212	31.4525	54.7392	41.1139	57.5184
Atp1a2	233.114	109.458	223.211	643.733	94.6576	108.874
Atp1a4	26.1015	38.8079	21.3065	7.66349	46.8507	28.7592
Casq1	0	0.995075	0	4.37914	0	4.10846
Stx1a	111.607	92.542	61.8903	93.0566	73.6226	92.4403
Ceacam9	0	0	0	0	0	0
Zfp775	195.312	195.035	238.43	227.715	228.517	206.45
Scube2	9.00053	6.96553	7.10217	3.28435	8.60524	10.2711
Mrpl49	1543.59	1678.69	1602.05	1687.06	1806.14	1929.95
Dennd2c	51.303	60.6996	66.9633	85.3932	65.0174	70.8709
Mark3	1857.71	2050.85	2040.35	1819.53	1946.7	1839.56
Gatad1	2072.82	2239.91	2533.45	2401.96	2433.37	2560.6
Pcdha10	5.40032	0	0	0	0	0
NA	0	0	0	0	0	0
M6pr	4733.38	5394.3	4863.97	4812.67	4929.85	4919.88
Lrrc8a	479.728	440.818	463.67	570.383	577.507	631.675
Mc5r	0	1.99015	0	1.09478	0.956138	0
Ppp2r1a	3791.92	3900.7	4017.8	3899.62	4247.16	3970.82
Fance	366.322	380.119	321.627	393.027	421.657	457.066
Tinf2	538.232	706.504	669.633	463.094	536.393	538.208
Tssk4	10.8006	5.97045	9.13136	4.37914	6.69296	4.10846
Hapln4	1.80011	1.99015	1.0146	0	0	0
Dus3l	584.134	634.858	577.305	603.226	649.217	642.974
Gtpbp3	473.428	573.163	463.67	461.999	455.122	419.063
Tgfbr1	1887.41	1850.84	2077.89	2036.3	1787.02	1913.51
Homer1	526.531	598.04	641.224	572.572	527.788	551.561
Rad51c	22.5013	22.8867	34.4963	39.4122	34.421	20.5423
Gabrb2	0	0	0	0	0.956138	0
Cav1	311.418	275.636	248.576	698.472	199.833	302.999
Arpp19	3674.92	4042	4119.26	4414.17	4572.25	4581.96
Bcl2l1	1099.86	1226.93	1041.99	1083.84	961.874	1263.35
Khsrp	1506.69	1435.89	1361.59	1627.94	1747.82	1409.2
Dio2	14.4008	26.867	5.07298	3.28435	0	0
Ccdc124	1077.36	1268.72	1365.65	1082.74	1392.14	1412.28
Cct4	4141.14	4823.13	4590.03	4336.44	4364.77	4421.73
0610009B22Rik	696.641	742.326	775.151	814.519	908.331	941.864
Cpt1c	116.107	76.6208	111.606	111.668	103.263	99.6301
Twist2	23.4014	11.9409	9.13136	7.66349	5.73683	5.13557
Zfp655	1609.29	2093.64	1889.18	1408.99	1600.57	1481.1
Rhoa	5588.43	5987.37	6187	6326.76	6147.97	6535.53
Zmiz1	3773.92	2825.02	3514.56	3386.17	3832.2	3007.39
Ankrd26	225.913	210.956	142.043	183.924	175.929	194.125
Aldh16a1	672.34	604.011	742.684	742.264	824.191	770.336
Hnrnpa0	4662.28	4696.76	4328.26	4809.39	4886.82	4837.71
Prrg2	153.009	130.355	154.219	199.251	208.438	247.535
Hnrnph1	6110.46	6476.95	6389.92	4545.54	4817.98	4553.2
Ift43	323.119	306.483	394.678	421.492	464.683	471.446
Id3	827.149	774.169	707.173	1220.68	970.48	1875.51
Tcap	2.70016	0	1.0146	0	0	2.05423
Arid1a	1575.99	1485.65	1299.7	1434.17	1463.85	1504.72
Crlf1	2.70016	4.97538	0	0	1.91228	1.02711
Ctsd	6264.37	5894.83	7160	8240.44	8927.46	9221.43
Rplp1	17136.1	22002.1	21232.4	21339.5	22807.7	23603.1
Cabs1	0	0	0	0	0	0
Hmgcll1	36.0021	17.9114	8.11676	10.9478	16.2543	13.3525
Ttc9b	0.900053	0	0	0	2.86841	0
Phox2a	174.61	50.7488	20.2919	28.4644	35.3771	1.02711
Abhd8	1675	1671.73	1880.05	2095.42	1894.11	2011.09
Ift22	545.432	548.287	550.925	585.709	638.7	652.218
Fzd3	214.213	227.872	228.284	225.526	182.622	193.098
1700008O03Rik	7.20042	4.97538	8.11676	12.0426	3.82455	19.5152
Mid1ip1	1194.37	1129.41	1193.16	1149.52	1281.22	1289.03
Ap2s1	1533.69	1589.14	1786.7	2056	2086.29	2336.69
Fgfrl1	502.23	498.533	446.422	543.013	493.367	621.404
4930432K21Rik	7.20042	6.96553	7.10217	5.47392	9.56138	9.24403
Fhl2	398.724	277.626	414.97	396.312	330.824	271.158
Emc10	1600.29	1758.3	1755.25	1600.57	1832.92	1836.48
Clstn3	186.311	144.286	153.204	182.829	163.5	165.365
Fbxw9	329.419	391.065	350.035	342.667	363.332	327.65
Spib	9.90058	8.95568	4.05838	5.47392	10.5175	6.16269
Fnbp4	911.754	799.046	794.428	774.012	707.542	737.468
Cers4	497.729	348.276	469.758	586.804	467.551	456.039
Scrn3	720.943	775.164	824.866	772.918	846.182	874.074
Phax	900.953	1023.93	924.297	1084.93	1118.68	1111.34
Tle1	518.431	380.119	442.364	545.202	461.814	464.256
1700109H08Rik	45.0027	17.9114	31.4525	20.8009	20.0789	11.2983
Relt	50.403	70.6504	28.4087	16.4218	22.9473	26.705
Snrpb2	1395.08	1498.58	1443.77	1434.17	1553.72	1580.73
Ubc	4304.05	5826.17	4029.97	4254.33	4512.01	3172.76
Prpf31	1218.67	1389.13	1239.84	996.254	1133.02	1122.64
Sertad1	544.532	613.962	415.984	432.44	470.42	656.326
Carhsp1	1935.11	2615.06	1746.12	1722.1	1316.6	1579.7
Elk3	1234.87	1283.65	1262.16	1354.25	1390.22	1151.4
Herpud2	1317.68	1371.21	1441.74	1646.56	1537.47	1430.77
Rdh13	396.023	495.548	391.634	317.487	336.56	458.093
Adam21	4.50027	10.9458	4.05838	6.5687	9.56138	1.02711
Nutf2	270.916	313.449	272.926	225.526	260.069	261.914
Fut1	0	0	1.0146	0	0	0
Arpc5	3187.09	3377.29	3009.29	2751.19	2836.86	2959.12
Rnf151	1.80011	2.98523	0	0	0.956138	0
Elavl2	9.90058	3.9803	1.0146	2.18957	3.82455	7.1898
Pou2f2	274.516	291.557	95.372	84.2984	49.7192	80.1149
Mgst1	9781.78	11458.3	11706.4	10335.9	12963.3	11708.1
Nfib	6222.97	5865.97	6108.88	7032.89	7306.8	7712.6
Htr3b	1.80011	0.995075	1.0146	2.18957	4.78069	0
Rab25	0.900053	1.99015	0	0	0.956138	1.02711
Ubqln4	1318.58	1490.62	1396.08	1095.88	1069.92	1115.45
Rbfox1	17.101	11.9409	9.13136	32.8435	25.8157	26.705
Rps18	5829.64	7707.85	7123.48	7795.96	8368.12	8632.9
Rpl10	6104.16	6194.34	6942.88	7412.78	7828.86	7882.08
Rps15a	6464.18	7928.76	7521.2	7862.74	7727.5	8332.98
Ncaph2	1900.01	2059.81	2264.58	1843.62	2042.31	2169.27
Hipk1	3149.29	3118.57	3257.87	3416.82	3331.18	3102.91
Gprc5b	6090.66	5992.34	7103.18	6313.62	6327.72	6836.47
Man1a2	1481.49	1586.15	1578.71	1481.24	1277.4	1416.39
Ceacam5	0	0	0	0	0	0
Tppp2	0	0	0	1.09478	0	0
Acyp1	346.52	406.986	526.575	523.307	593.761	604.97
Cldn13	0	0	0	0	0	0
Cd163	0.900053	0.995075	2.02919	18.6113	8.60524	6.16269
Hdac5	1585.89	1436.89	1722.78	1666.26	1836.74	1706.04
Rala	2692.96	2730.49	2747.52	2785.13	2791.92	2792.72
Clec3a	0	0	0	0	0	0
Vdac3	1936.01	2110.56	2325.45	2498.3	2489.78	2423.99
Slc1a7	1.80011	0	0	1.09478	0.956138	1.02711
Vps72	737.143	796.06	673.691	815.614	880.603	794.987
Gabpa	1478.79	1469.73	1475.22	1358.63	1332.86	1201.72
Bmp7	3155.59	3458.88	3700.23	2741.34	3626.63	3828.06
Dynll1	846.95	1090.6	854.29	911.955	945.62	1064.09
Pdcl	1346.48	1454.8	1620.31	1500.95	1613	1462.61
Tmem184b	1983.72	2091.65	1671.04	1539.27	1478.19	1576.62
NA	0	0	0	0	0	0
Rsph14	23.4014	22.8867	26.3795	25.18	22.9473	31.8406
Nf2	1927.01	1813.03	1985.56	1839.24	1730.61	1625.92
Cabp7	7.20042	2.98523	4.05838	3.28435	2.86841	4.10846
Zmat5	624.637	648.789	689.925	813.425	953.269	960.352
Ewsr1	3183.49	3313.6	2853.04	2698.64	2867.46	2705.42
Ap1b1	1400.48	1227.92	1283.46	1368.48	1548.94	1407.15
Derl3	21.6013	18.9064	30.4379	28.4644	26.7719	24.6507
Gstt4	4.50027	2.98523	7.10217	0	1.91228	0
Tbx1	0	0	0	0	0	0
Gnat2	430.225	612.967	579.334	337.194	439.823	391.331
Bcl2l13	1261.87	1268.72	1272.3	1121.06	1096.69	1051.77
2610028H24Rik	0	0	0	0	0	0
Spatc1l	1.80011	0	0	0	0	0
Dqx1	18.9011	22.8867	18.2627	22.9905	26.7719	10.2711
Ccl8	3.60021	3.9803	4.05838	5.47392	0	0
Lnpk	257.415	305.488	294.233	221.146	229.473	197.206
Prr29	0	0	0	0	0	0
Mymk	0.900053	0.995075	0	0	0	0
Fam163b	23.4014	5.97045	2.02919	1.09478	3.82455	1.02711
Trpm5	2.70016	1.99015	2.02919	2.18957	0	0
Ascl2	0	0	1.0146	1.09478	4.78069	0
Rarres2	394.223	353.252	322.641	374.416	250.508	271.158
Pttg1ip	4895.39	4783.33	5335.76	5598.73	5322.82	5816.55
Trpm2	32.4019	19.9015	37.54	55.834	40.1578	46.2202
Ube2g2	1156.57	1356.29	1327.09	1103.54	1125.37	1289.03
Mpo	0	2.98523	0	0	0	0
Lpo	0	0	0	0	0	0
Met	25.2015	19.9015	22.3211	40.507	9.56138	4.10846
Slc16a12	34.202	11.9409	21.3065	37.2227	16.2543	29.7863
Syn2	166.51	55.7242	39.5692	56.9288	46.8507	15.4067
Elk1	439.226	441.814	422.072	601.036	523.007	562.859
Nav1	448.226	308.473	338.875	397.407	326.043	317.378
Tnpo1	3702.82	3802.18	3819.95	3781.38	3466.96	3387.42
Myod1	0	0	0	0	0	0
Otog	0	0	0	0	0	0
Rnmt	1119.67	1144.34	1234.76	887.87	971.436	841.207
Kcnq1	405.924	347.281	437.291	707.231	516.314	501.232
Srp14	2834.27	3063.84	3367.44	3898.53	4211.79	4516.22
6330409D20Rik	0	0	0	0	0.956138	1.02711
Cdk9	1137.67	1174.19	1020.68	1049.9	1071.83	1086.69
Tor2a	519.331	526.395	436.276	495.937	545.955	548.479
Fpgs	307.818	362.207	264.809	313.108	290.666	270.131
Mkl2	1035.06	899.548	826.895	1126.53	936.059	937.756
Cbx5	2198.83	1998.11	2189.5	2527.86	2245.97	2119.96
Odam	0	0	0	0	0	0
Apobec3	315.919	323.4	172.481	194.872	137.684	253.697
St6galnac1	9.90058	14.9261	6.08757	3.28435	2.86841	8.21692
Taf7l	0	0	0	0	0	0
Sardh	112.507	74.6307	135.956	172.976	154.894	162.284
Vav2	1128.67	1327.43	946.618	1045.52	1060.36	1026.09
Tex15	1.80011	0	2.02919	1.09478	1.91228	1.02711
Ppp2cb	1499.49	1566.25	1512.76	1370.67	1404.57	1402.01
G0s2	217.813	198.02	182.627	391.933	236.166	211.586
Dmap1	410.424	458.73	390.619	383.174	479.025	421.117
Pla2g12b	0	0	0	0	0	0
Mcu	1291.58	1233.89	1199.25	1429.79	1244.89	1373.25
Oit3	137.708	145.281	87.2552	87.5827	148.201	133.525
Tex11	0	0	0	1.09478	1.91228	0
Bcr	1833.41	1630.93	1587.84	1802.01	1562.33	1757.39
Fxyd5	409.524	574.159	368.298	398.501	302.14	437.551
Kcnd1	22.5013	5.97045	3.04379	6.5687	4.78069	3.08134
Tfcp2	381.623	438.828	397.721	412.734	412.095	438.578
Pou6f2	0	0	1.0146	0	0	0
Pou6f1	362.721	293.547	382.503	387.554	397.753	387.222
Ubp1	987.358	950.297	940.53	814.519	876.778	793.96
Nuak2	88.2052	95.5272	73.0509	83.2036	87.9647	82.1692
Ick	636.338	539.331	616.874	682.05	637.744	532.045
Sdhb	4199.65	4501.72	5236.33	5392.91	6530.42	6166.8
Cox4i2	21.6013	11.9409	18.2627	40.507	25.8157	16.4338
Snap47	1528.29	1576.2	1774.53	1588.53	1846.3	1895.03
Wnt3a	0	0	0	0	0	0
Kdsr	1743.4	1648.84	2059.63	1897.26	2219.2	2278.14
Vps4b	2919.77	3088.71	3229.46	2963.58	2976.46	2865.65
Rps25	3646.12	4444.01	4418.56	4653.93	5273.1	5478.63
Nxf2	1.80011	3.9803	3.04379	5.47392	6.69296	0
Taz	1139.47	1210.01	1341.3	1337.83	1434.21	1291.08
Kif19a	8.10048	13.9311	6.08757	12.0426	16.2543	14.3796
Aldh3a2	1322.18	1318.48	1464.06	1326.88	1515.48	1484.18
Zmynd10	3.60021	0	3.04379	4.37914	2.86841	2.05423
Tmem115	770.445	903.529	836.027	839.699	925.541	880.237
Hyal2	530.131	487.587	521.502	564.909	548.823	570.049
Ifrd2	850.55	855.765	876.611	751.022	817.498	771.363
Hyal1	21.6013	20.8966	23.3357	42.6966	41.1139	42.1117
Tusc2	1170.07	1292.6	1211.43	1307.17	1237.24	1372.23
Nprl2	319.519	300.513	308.437	398.501	425.481	371.815
Slc38a3	5.40032	3.9803	0	6.5687	0	0
Cacna2d2	51.303	30.8473	19.2773	31.7487	34.421	33.8948
Rassf1	471.628	554.257	383.517	368.942	365.245	426.253
Epn3	623.737	739.341	516.429	339.383	420.701	394.412
Rnf112	19.8012	0.995075	0	0	0.956138	0
Slc3a2	3600.21	4723.62	4425.67	2789.51	3257.56	4219.39
Nxf1	1938.71	2117.52	2064.7	2062.57	1955.3	1944.33
Stx5a	1756	1894.62	2091.08	1718.81	1799.45	1835.45
Slc47a1	5.40032	4.97538	11.1606	7.66349	5.73683	5.13557
Pifo	0	0	0	0	0	0
Tnfrsf13b	32.4019	27.8621	38.5546	60.2131	47.8069	54.4371
Spire2	24.3014	6.96553	1.0146	6.5687	4.78069	0
Prox1	1244.77	1365.24	1089.68	1324.69	1411.26	925.43
Raver1	0	0	0	0	0	0
2610507B11Rik	5275.21	5515.7	6184.97	5115.93	4764.43	4570.66
AI597479	510.33	561.223	592.524	680.956	679.814	677.896
Tmem86a	2314.94	1628.94	2113.4	3761.68	3528.15	3811.62
Optc	17.101	16.9163	15.2189	33.9383	14.3421	29.7863
Tex14	9.90058	15.9212	13.1897	14.2322	9.56138	11.2983
Ifi35	3252.79	4685.81	1845.55	1105.73	1143.54	1268.49
Rdm1	241.214	209.961	348.006	370.037	379.587	415.981
Nedd8	2158.33	2507.59	2561.85	2683.32	2834.95	3021.77
Gosr1	1489.59	1715.51	1524.94	1417.75	1420.82	1512.94
Mrpl52	1008.96	1432.91	1271.29	1288.56	1317.56	1512.94
Spaca7	0	0	0	0	0	0
Kansl3	2833.37	2967.32	3126.98	2660.33	2877.02	2543.14
Eya4	17.101	4.97538	10.146	9.85306	9.56138	11.2983
Ebf3	5.40032	5.97045	7.10217	17.5165	5.73683	7.1898
Uckl1os	0.900053	0	1.0146	2.18957	5.73683	1.02711
Myt1	32.4019	11.9409	4.05838	8.75827	7.6491	2.05423
Faf1	929.755	959.253	899.946	766.349	764.91	824.773
Gm266	0.900053	2.98523	1.0146	3.28435	0.956138	4.10846
Tsacc	23.4014	23.8818	23.3357	28.4644	14.3421	33.8948
Mettl16	991.859	1074.68	954.734	948.083	985.778	1020.95
Dazl	7.20042	2.98523	4.05838	12.0426	8.60524	8.21692
Apol7a	1.80011	2.98523	1.0146	2.18957	0.956138	1.02711
Pigyl	564.333	568.188	670.648	800.287	763.954	843.261
Rbm25	3405.8	3337.48	3292.36	3115.76	3458.35	3503.49
Psen2	595.835	574.159	619.918	649.207	741.007	883.319
Acaa1b	3.60021	0.995075	4.05838	9.85306	0.956138	2.05423
Plcd1	320.419	249.764	292.204	275.886	253.376	274.24
Fads1	22665.1	18857.7	29495.3	26809.1	34488.8	31233.5
Lmbr1	333.02	373.153	482.948	394.122	414.964	406.737
Tnfrsf22	105.306	127.37	126.824	88.6775	101.351	104.766
Cars	933.355	1421.96	785.297	604.321	695.112	596.754
Phlda2	4.50027	1.99015	3.04379	6.5687	6.69296	7.1898
Asz1	0	0	0	0	0	0
Wnt2	0	0	0	1.09478	0	3.08134
Gabra1	0.900053	0	0	0	1.91228	0
Grid2ip	2.70016	0.995075	2.02919	0	0	0
Kdelr3	118.807	128.365	116.678	95.2462	107.087	148.932
Cfap97d1	0	0	0	0	0	0
Apip	397.823	368.178	462.656	558.34	606.191	574.157
Pdhx	1489.59	1544.36	1565.52	1401.32	1626.39	1518.08
Vac14	585.035	589.085	546.867	406.165	489.542	419.063
Mcoln2	2.70016	4.97538	0	0	0	2.05423
Slc5a1	0	0	0	0	0	0
NA	0	0	1.0146	0	0	0
Akt1s1	1547.19	1743.37	1648.72	1714.43	1831.96	1821.07
Tbrg1	1462.59	1488.63	1338.25	1348.77	1367.28	1433.85
Panx3	0	0	1.0146	0	0	0
Adssl1	567.934	608.986	723.407	799.192	874.866	917.213
Cfap161	2.70016	0	4.05838	2.18957	2.86841	6.16269
Brf1	851.45	796.06	844.144	759.78	757.261	789.851
Vipr2	4.50027	0.995075	0	1.09478	0	0
Odc1	9436.16	13146.9	9190.21	4494.09	6227.32	6356.81
Thg1l	448.226	531.37	457.583	376.606	466.595	387.222
Adam19	110.707	151.251	86.2406	120.426	120.473	109.901
Pabpc4	1162.87	1177.17	1137.36	927.282	1092.87	1070.25
Exoc3l2	1087.26	881.637	1368.69	1445.12	1524.08	1135.99
Zfp296	8.10048	10.9458	6.08757	8.75827	15.2982	10.2711
Plin5	353.721	351.262	215.094	671.103	676.945	646.055
Sugp1	706.542	719.44	607.743	729.126	814.629	733.36
Dmrtc2	0	0	0	0	0	0
Gm5893	0	0	0	0	0	0
Dhdh	2126.83	1680.68	2770.86	3096.05	3563.53	3616.47
Zfp790	301.518	304.493	248.576	262.748	261.982	281.429
Cpb1	198.912	172.148	273.941	333.909	265.806	169.474
Slc25a41	0	0	0	0	0.956138	2.05423
Fsd1	3.60021	0.995075	0	0	0	0
Pinlyp	0.900053	0	0	0	0	1.02711
Fuz	540.932	569.183	663.546	688.619	777.34	697.411
Sptbn4	27.0016	5.97045	4.05838	3.28435	5.73683	2.05423
Pgam1	1424.78	1429.92	1679.16	1525.03	1811.88	1824.16
Evi5	1905.41	1976.22	2318.35	2088.85	1874.99	1915.57
Evi5l	654.339	708.494	723.407	708.325	698.937	735.414
Snapc2	542.732	607.991	534.692	622.932	580.376	562.859
Git1	1173.67	1224.94	1084.6	1028	980.997	852.505
Gltp	821.748	820.937	989.231	1073.98	1222.9	1186.32
Bnip2	2805.47	2905.62	3083.36	2798.27	2788.1	2907.76
Ccnt1	1403.18	1363.25	1449.86	1197.69	1311.82	1630.03
Scarf2	144.909	120.404	151.175	218.957	146.289	129.416
4930579F01Rik	0	0	0	0	0	0
Brms1l	1135.87	1114.48	1157.65	1114.49	1163.62	1139.07
Med15	1071.06	1148.32	1032.86	941.514	1077.57	931.593
Dhdds	1274.48	1210.01	1282.45	1359.72	1395	1302.38
Crybg2	0	0	0	1.09478	0	0
Ubxn11	85.505	60.6996	100.445	99.6254	130.035	117.091
Mogat1	0.900053	0	3.04379	9.85306	0	0
Tex22	0	1.99015	0	1.09478	0	0
Wnt8a	0	0	0	0	0	0
Tjap1	477.928	529.38	503.239	341.573	414.008	403.656
Ehf	5.40032	0.995075	3.04379	3.28435	3.82455	4.10846
Nanog	0	0	0	0	0	0
Rpl15	3752.32	4451.97	4418.56	4239	4539.74	4494.65
Tmem167	1718.2	1897.61	1836.42	1538.17	1635	1598.19
Steap4	999.059	1377.18	466.714	405.07	282.061	318.406
Mplkip	354.621	395.045	311.481	367.847	363.332	313.27
Kif11	13.5008	18.9064	24.3503	15.327	10.5175	5.13557
Rpa3	222.313	228.867	214.08	267.127	284.929	318.406
Mlkl	1137.67	1585.16	401.78	208.009	196.008	241.372
Phox2b	246.615	80.6011	18.2627	37.2227	35.3771	2.05423
Tnpo3	1575.09	1653.82	1554.36	1394.75	1527.91	1500.61
Ttll5	263.716	262.7	277.999	322.961	285.885	275.267
Zfp715	819.048	827.903	979.085	869.259	856.699	780.607
Retn	40.5024	2.98523	67.9779	351.426	3.82455	9.24403
Acp4	0.900053	0.995075	0	0	0.956138	0
Cdh23	0.900053	0.995075	1.0146	3.28435	3.82455	0
Rps5	12371.2	15133.1	13138	14036.2	14084.9	14440.2
Podnl1	6.30037	4.97538	7.10217	9.85306	3.82455	9.24403
Adgrl1	2462.55	2056.82	2827.68	2771.99	3252.78	2865.65
Amotl1	1632.7	1479.68	1538.13	1592.91	1566.15	1502.67
2200002J24Rik	53.1031	41.7932	78.1239	87.5827	109.956	109.901
Etv5	710.142	661.725	713.261	780.581	551.691	505.34
Tmem190	0	0	0	0	0	0
Gfod2	243.014	281.606	205.963	251.8	230.429	259.86
Enkd1	92.7055	109.458	84.2114	82.1088	91.7892	88.3319
4933405L10Rik	0	0	0	0	0	1.02711
Atp6v0d1	1765.9	1599.09	1996.72	1965.14	2193.38	2286.36
Ptprs	5286.01	4595.26	6060.18	4731.66	5555.16	5439.6
Slc41a1	2089.02	1900.59	1580.74	1831.57	1697.14	2017.25
Fer1l4	0	0	0	0	0	0
4931406B18Rik	0	0	0	0	0	0
Iglon5	19.8012	2.98523	4.05838	10.9478	5.73683	1.02711
Igf2bp1	4.50027	4.97538	8.11676	1.09478	0.956138	0
B4galnt2	0	0	0	0	0.956138	0
Zfp651	1097.16	1050.8	1089.68	988.59	1006.81	983.976
Nelfb	1351.88	1467.74	1382.89	1522.84	1569.98	1518.08
Card14	54.0032	55.7242	54.7882	120.426	121.429	153.04
Tmem175	566.133	544.306	543.823	601.036	603.323	646.055
Bcas1	0.900053	0	0	3.28435	0.956138	0
Tango2	189.911	214.936	193.788	158.744	204.613	201.314
NA	0	0	0	0	0	0
Aldh1a2	1276.28	906.514	1144.46	1735.23	996.295	1081.55
Ndufs2	11545	13898.2	13059.9	11405.5	12939.4	13047.4
Snx31	0.900053	0	4.05838	4.37914	1.91228	4.10846
Atraid	1651.6	1548.34	2066.73	2364.73	2633.2	2684.88
Cad	847.85	788.1	763.991	790.434	769.691	803.204
Lypd8	0	0	0	0	0	0
Sh3bp5l	990.958	1042.84	1070.4	1132.01	1204.73	1118.53
1810065E05Rik	0	0	0	0	0	0
Atad1	3166.39	3370.32	3362.37	3177.06	3272.86	3201.52
Pten	2559.75	2392.16	2685.63	2373.49	2253.62	2157.97
4933402N03Rik	0	0	0	0	0	0
Pea15a	1020.66	984.13	1068.37	1315.93	1199	1374.28
Timm23	225.913	308.473	247.561	209.104	204.613	182.826
Tnfaip8l2	28.8017	35.8227	24.3503	42.6966	40.1578	40.0575
Trnt1	1288.88	1507.54	1433.62	1136.39	1241.07	1138.04
Ly6g6e	0	0.995075	0	1.09478	0	0
Ehmt2	2768.56	2838.95	2959.58	2670.18	2941.08	2705.42
Elof1	936.055	1180.16	1139.39	1138.58	1186.57	1305.46
Med16	776.746	714.464	865.45	810.14	927.454	852.505
St3gal1	399.624	473.656	432.218	386.459	347.078	307.107
Tmem259	2219.53	2518.54	2408.65	2243.21	2299.51	2314.09
Rnf170	336.62	281.606	325.685	394.122	324.131	321.487
Clip3	139.508	71.6454	62.9049	77.7297	56.4121	49.3015
NA	0.900053	0.995075	3.04379	1.09478	2.86841	1.02711
Myl2	0.900053	0	0	0	0	0
Dedd	637.238	663.715	627.02	615.269	657.823	668.652
Mcemp1	8.10048	34.8276	4.05838	2.18957	0.956138	0
Nit1	1242.07	1122.45	1434.64	1574.3	1598.66	1674.2
Pax5	92.7055	83.5863	53.7736	12.0426	34.421	33.8948
Prdm15	217.813	212.946	224.226	163.123	190.271	196.179
Rnf168	1376.18	1290.61	1436.67	1578.68	1371.1	1554.02
Tctex1d2	210.612	198.02	276.985	260.559	303.096	279.375
Chp1	4331.06	5066.92	5091.24	4280.61	4217.52	4707.27
Sval2	0	0	0	0	0	0
Trpv4	18.9011	19.9015	19.2773	30.654	30.5964	9.24403
Klhl3	39.6023	26.867	22.3211	22.9905	21.9912	29.7863
Tvp23b	1422.98	1613.02	1609.15	1497.66	1519.3	1543.75
Dnajc7	3094.38	3165.34	2828.69	3311.72	3340.75	3228.22
Zfp385c	9.00053	1.99015	8.11676	5.47392	4.78069	7.1898
Cacybp	2777.56	3337.48	3020.45	2689.88	2662.84	2653.04
Cluap1	385.223	404.001	333.802	425.871	471.376	495.069
Zswim7	125.107	120.404	149.146	151.08	175.929	182.826
Pigl	177.31	127.37	142.043	175.165	149.157	173.582
Ndufa2	1702.9	2039.9	2029.19	2357.07	2363.57	2653.04
Pam16	280.817	366.188	336.846	325.151	395.841	366.68
Glis2	343.82	276.631	258.722	372.227	308.832	323.541
Cox6c	3823.43	4694.77	4892.38	5145.49	5833.4	5613.18
Bicc1	547.232	340.316	403.809	446.672	406.359	390.304
Ube2z	2528.25	2859.85	2776.95	2694.26	2671.45	2732.12
Gip	0	0	0	0	0	0
Tmem87b	1351.88	1326.44	1321	1215.21	1235.33	1445.15
Anapc1	1990.02	1957.31	2115.43	1955.28	1946.7	1811.83
Mertk	405.924	376.139	437.291	383.174	322.218	351.273
Tsg101	1259.17	1175.18	1329.12	1399.13	1343.37	1351.68
Hps5	583.234	556.247	563.101	607.605	589.937	612.16
Map3k4	601.235	567.193	579.334	571.477	608.104	578.265
Piezo1	621.037	690.582	520.488	424.776	457.034	370.788
Blk	0.900053	0.995075	6.08757	1.09478	0	0
Rnf166	846.05	766.208	937.486	1000.63	1040.28	963.433
Ankrd28	561.633	640.829	555.998	469.662	445.56	430.361
Ankrd52	1344.68	1270.71	1266.22	1089.31	915.024	939.81
Pkd2l2	10.8006	8.95568	18.2627	27.3696	27.728	18.4881
Srp19	1653.4	1791.14	2012.96	1606.05	1642.64	1902.22
Tmbim7	0	0	0	0	0	0
Clec4f	0	0	0	0	0	0
Klra17	0	1.99015	1.0146	0	1.91228	6.16269
Wdfy2	189.011	216.926	203.934	165.312	114.737	116.064
Rbsn	887.452	952.287	997.347	815.614	860.524	846.342
Mrps25	828.949	877.657	836.027	977.642	1087.13	1031.22
Dguok	653.439	604.011	656.443	772.918	747.7	812.448
Camta1	226.813	222.897	249.591	248.516	214.175	217.748
Csf1	872.151	1195.09	475.845	709.42	669.296	738.495
Strip1	757.845	756.257	751.815	708.325	813.673	661.462
Kif1a	820.848	543.311	778.195	1025.81	943.708	958.298
Alx3	0	0	0	0	0	0
Slc25a11	1936.91	2102.59	2280.81	2336.27	2397.99	2547.24
Chrne	0	0	3.04379	1.09478	0	0
Cmc2	603.936	633.863	818.779	922.903	1090.95	1202.75
Chfr	558.933	586.099	541.794	461.999	492.411	497.123
Ceacam16	0.900053	0.995075	0	0	0	0
Hoxa2	24.3014	18.9064	14.2043	27.3696	17.2105	18.4881
Adam28	1.80011	0	0	0	0	0
Ankrd53	0	0	0	2.18957	2.86841	0
Tex261	3457.1	4665.91	4123.32	3414.63	3697.38	3847.57
Fam120b	854.15	817.952	840.085	756.496	774.472	760.065
Tbp	585.935	648.789	589.48	573.667	603.323	595.726
Psmb1	4773.88	5277.88	5471.71	5683.02	6031.32	6059.98
Pdcd2	505.83	552.267	455.553	548.487	549.779	528.964
Dll1	90.9054	95.5272	70.0071	74.4453	64.0612	98.603
Nol3	29.7018	12.936	14.2043	17.5165	16.2543	6.16269
Fhod1	315.019	263.695	246.547	316.393	306.92	270.131
Plekhg4	7.20042	11.9409	19.2773	9.85306	5.73683	5.13557
Slc9a5	26.1015	20.8966	25.3649	14.2322	17.2105	24.6507
Elmo3	121.507	98.5125	109.576	190.492	165.412	143.796
Stc1	121.507	168.168	97.4012	60.2131	65.9735	65.7353
4931428F04Rik	99.0058	91.5469	68.9925	67.8766	68.8419	88.3319
Tppp3	133.208	52.739	14.2043	42.6966	38.2455	7.1898
Msh3	613.836	612.967	624.991	568.193	674.077	575.184
Adamts13	0	0	0	0	0	0
Tmem208	756.045	848.799	864.435	712.704	820.366	896.671
E2f4	740.744	723.42	633.108	650.302	567.946	642.974
Surf4	7672.05	7928.76	8085.31	7986.45	7760.97	8403.85
Surf2	611.136	688.592	652.385	605.416	727.621	739.522
Dnajb9	2338.34	2194.14	2527.36	2652.66	2134.1	2624.28
Naf1	516.63	558.237	569.188	478.421	467.551	494.042
Yes1	1607.49	2191.16	2009.91	1510.8	1472.45	1526.29
Ppp1cb	14819.4	16854.6	18066.9	11230.3	13516	12434.2
Gorasp2	3278.89	3137.47	3343.09	3123.42	3232.7	3288.82
Tsen15	380.722	497.538	373.371	435.724	470.42	435.497
Oc90	0	0	0	1.09478	0	0
Efr3a	2440.94	2349.37	2628.82	2504.87	2521.34	2387.01
Trappc2l	612.036	565.203	665.575	756.496	838.533	915.159
Acsf3	605.736	495.548	668.619	741.169	771.603	850.451
Ddx19a	564.333	522.415	516.429	602.131	583.244	483.771
Galns	206.112	170.158	193.788	165.312	134.815	170.501
Gata2	447.326	208.966	127.839	163.123	159.675	139.688
C8g	8.10048	9.95075	13.1897	21.8957	11.4737	20.5423
Entpd2	31.5019	18.9064	22.3211	32.8435	26.7719	28.7592
Rabl6	2829.77	2806.11	3094.52	2827.83	3035.74	3115.24
Ptgds	12.6007	1.99015	4.05838	9.85306	4.78069	3.08134
Edf1	2221.33	2509.58	2437.06	2666.89	3102.67	3129.62
Clic3	0	0	0	2.18957	2.86841	0
Npdc1	1347.38	1215.98	1401.16	1507.52	1556.59	1661.87
Fbxw5	1275.38	1323.45	1570.59	1186.75	1280.27	1297.25
Slc25a13	571.534	451.764	612.816	619.648	692.244	644.001
Ube2i	862.251	885.617	868.494	629.501	717.103	630.648
Tsr3	460.827	478.631	501.21	458.715	523.963	522.801
Unkl	192.611	158.217	149.146	132.469	132.903	152.013
Lrrk1	741.644	710.484	608.757	595.563	566.034	484.798
Aldh1a3	150.309	117.419	81.1676	68.9714	67.8858	67.7896
Actn1	684.94	638.838	522.517	412.734	481.893	413.927
Sirt2	1180.87	1080.65	1357.53	1708.96	1693.32	1737.88
Hnrnpl	4567.77	4918.66	4543.36	4748.08	5284.57	5131.46
Nolc1	1297.88	1401.07	1335.21	914.145	1130.15	1067.17
Casd1	1305.98	1325.44	1424.49	1441.83	1441.86	1417.42
Cnksr3	324.919	353.252	304.379	349.236	308.832	390.304
Mtmr1	1126.87	1192.1	1163.74	1013.77	1130.15	1009.65
Hmgb3	2116.92	1897.61	2370.1	2519.1	2434.33	2355.17
Map2	919.854	714.464	925.311	791.529	892.076	877.156
Cyp2j9	27.9016	10.9458	20.2919	12.0426	17.2105	20.5423
Nipsnap3a	0	0	0	0	0	0
Abca1	2650.66	2189.17	1672.05	4664.88	3967.97	5122.22
Nipsnap3b	887.452	1032.89	915.165	703.946	873.91	886.4
Lage3	586.835	603.016	661.516	738.979	836.62	883.319
Ubl4a	2318.54	2633.96	2561.85	2450.13	2376	2578.06
Gdi1	3552.51	3336.49	3991.42	3576.66	3933.55	3915.36
Sash1	538.232	487.587	582.378	624.027	556.472	574.157
Gadd45b	1437.38	1686.65	1440.73	3509.88	2058.56	7895.43
Slamf6	26.1015	15.9212	18.2627	9.85306	1.91228	2.05423
Slamf1	4.50027	1.99015	0	2.18957	0.956138	2.05423
Zdhhc12	252.015	280.611	223.211	285.739	274.412	285.538
Endog	261.015	285.587	286.116	299.971	348.99	391.331
Cybb	1289.78	1127.42	1013.58	780.581	717.103	875.102
Golga7	1194.37	1296.58	1297.67	1415.56	1353.89	1378.39
Xk	58.5035	56.7193	47.686	68.9714	61.1928	80.1149
Pcolce2	0	0	5.07298	4.37914	0	1.02711
Cd48	152.109	126.375	109.576	118.237	84.1401	123.254
Clpx	1775.8	1730.44	1735.97	2046.15	2081.51	2006.98
Trabd	1124.17	1128.42	1171.86	1050.99	1038.37	1107.23
Mov10l1	0	0	0	0	0.956138	0
Dennd6b	108.006	133.34	78.1239	64.5923	68.8419	68.8167
Cd83	107.106	65.675	71.0217	126.995	65.0174	81.142
Cltrn	0	1.99015	0	2.18957	0	0
Ace2	311.418	237.823	308.437	389.743	389.148	404.683
Gzmb	90.0053	170.158	36.5254	18.6113	19.1228	19.5152
Gzmf	0	0	0	0	0	0
Gzmn	0	0	0	0	0	0
C4a	878.452	956.268	1412.32	944.799	2086.29	1384.55
Ager	3.60021	3.9803	5.07298	2.18957	3.82455	6.16269
Atf6b	1073.76	1223.94	1130.26	794.813	959.962	956.244
Egfl8	2.70016	11.9409	12.1751	9.85306	12.4298	5.13557
Notch4	511.23	500.523	641.224	516.738	496.235	490.961
Ppt2	452.727	453.754	457.583	544.108	592.805	621.404
Prrt1	65.7039	42.7882	45.6568	66.7818	33.4648	39.0304
Rnf5	859.551	824.918	985.172	978.737	1102.43	1005.55
Fam163a	77.4046	31.8424	6.08757	19.7061	13.3859	3.08134
Cacfd1	1954.92	1907.56	1965.27	1968.42	2035.62	2211.38
Hivep2	792.047	720.435	966.91	845.173	805.068	703.573
2310057J18Rik	0	0	0	3.28435	0	0
Arnt	1164.67	1148.32	1045.03	1150.62	1075.65	1071.28
Itga2	59.4035	75.6257	91.3136	24.0853	44.9385	15.4067
Mocs2	3960.23	5607.25	3264.97	2288.1	3031.91	2522.59
Nat9	343.82	337.331	351.05	391.933	383.411	410.846
Lpl	1842.41	995.075	1544.21	4967.04	1230.55	1083.61
Atp6v0e	2704.66	3009.11	3240.62	2955.92	2994.62	3238.49
Nkx2-5	1.80011	0	0	1.09478	0	0
Zfp318	499.529	509.479	473.816	460.904	350.903	382.087
Ttbk1	5.40032	2.98523	1.0146	6.5687	0.956138	0
Srf	746.144	845.814	820.808	603.226	634.875	686.113
Gata3	237.614	92.542	23.3357	33.9383	41.1139	13.3525
Gata5	0.900053	0	0	0	0	0
Lama5	796.547	614.957	899.946	731.316	729.533	607.025
Steap1	1211.47	1090.6	1174.9	1438.55	1134.94	1014.79
Steap2	5525.43	4667.9	5776.09	5822.06	5075.18	4898.31
Hspa8	15297.3	19518.4	13753.9	12653.5	11884.8	12771.1
Serac1	110.707	140.306	128.854	101.815	87.0085	89.359
Awat1	0	0	0	0	0	0
Pdzd11	951.356	1032.89	927.34	948.083	997.252	1065.12
Psma2	4346.36	5391.32	4457.12	4187.55	4307.4	4489.52
Mrpl32	774.046	1050.8	854.29	814.519	903.55	956.244
Setdb1	803.747	754.267	722.392	726.937	705.63	685.085
Anxa9	45.9027	41.7932	61.8903	78.8245	60.2367	58.5455
Arnt2	513.03	229.862	162.335	186.113	165.412	81.142
Prune1	949.556	934.376	938.501	1003.92	911.199	1053.82
Cers2	6244.57	6796.37	7251.31	6806.27	6940.6	7515.4
Nlrp5	0	0	0	0	0	0
Capza2	5214.01	5434.11	5196.76	4197.4	4188.84	4443.3
Plekho1	366.322	396.04	348.006	391.933	314.569	304.026
Vps45	466.228	544.306	472.802	445.577	514.402	487.879
Prpf3	439.226	456.74	408.882	399.596	419.744	388.249
Anp32e	2433.74	2520.53	2595.34	2192.85	2492.65	2375.72
Aph1a	669.64	642.819	634.122	703.946	605.235	644.001
Tab2	1482.39	1533.41	1502.62	1558.97	1301.3	1475.96
Ppil4	992.759	916.465	1059.24	852.837	853.831	875.102
Cnih1	3557.01	4168.37	4620.47	3977.35	4153.46	4285.12
Eps8	1479.69	1507.54	1575.67	1419.93	1451.42	1626.95
Med22	1517.49	1685.66	1723.8	1576.49	1519.3	1606.41
Abo	0	0	0	0	0	0
Surf1	1248.37	1171.2	1411.3	1511.9	1523.13	1743.01
Med28	1736.2	2003.09	1933.82	1954.19	1943.83	2098.4
Qdpr	2065.62	1756.31	2335.6	2438.08	2552.89	2683.85
Gnrh1	3.60021	5.97045	4.05838	5.47392	4.78069	2.05423
Tnr	93.6055	17.9114	7.10217	9.85306	9.56138	2.05423
Sqstm1	15649.2	14819.7	14627.4	19027.3	19585.5	21270.5
Nfe2l2	2825.27	2642.92	2670.42	2752.29	2816.78	3965.69
Rxrg	5.40032	0.995075	0	3.28435	6.69296	0
Rxra	1185.37	1073.69	1117.07	1135.29	1083.3	1209.94
Adamtsl4	91.8054	74.6307	71.0217	106.194	90.8331	96.5488
Fcrls	5.40032	0	3.04379	7.66349	7.6491	4.10846
Cd5l	4.50027	0	0	2.18957	0	0
Prpsap1	998.159	947.312	1012.57	1147.33	1151.19	1157.56
Fam184b	2.70016	0.995075	0	4.37914	0	2.05423
Ncapg	33.302	31.8424	39.5692	32.8435	30.5964	24.6507
Lcorl	638.138	567.193	723.407	668.913	568.902	559.777
Lta4h	895.553	901.538	948.647	1054.28	1086.17	977.813
Amdhd1	0	0	0	0	0	0
Dstn	4003.44	3984.28	4897.45	4217.11	4679.34	4588.12
H2afy	2206.93	2255.84	2009.91	1714.43	2011.71	1926.87
Gtf2ird2	340.22	332.355	294.233	263.843	328.911	269.104
Bola1	441.926	435.843	463.67	428.061	562.209	598.808
Castor2	499.529	420.917	483.962	639.354	626.27	646.055
Fcgr1	446.426	599.035	289.16	149.985	140.552	173.582
Ncf1	179.111	191.054	130.883	142.322	116.649	154.067
Wnt11	3.60021	0.995075	2.02919	3.28435	0	1.02711
Adss	2256.43	2145.38	2430.97	2161.1	2275.61	2221.65
1700016C15Rik	0	0	0	0	0	0
Il17rb	4.50027	0.995075	1.0146	3.28435	0.956138	0
Cacna1d	277.216	162.197	180.598	270.412	178.798	173.582
Chdh	35.1021	18.9064	4.05838	24.0853	2.86841	0
Actr8	883.852	917.46	907.048	908.671	984.822	979.867
Lrrc27	21.6013	17.9114	21.3065	25.18	30.5964	20.5423
Stk32c	34.202	19.9015	24.3503	13.1374	24.8596	24.6507
Fnta	2386.94	2392.16	2627.8	2911.03	3124.66	3290.87
Mtrex	1534.59	1779.19	1628.43	1329.07	1450.46	1473.91
Lbp	218.713	229.862	172.481	208.009	168.28	196.179
Celsr1	13.5008	23.8818	22.3211	25.18	19.1228	11.2983
Fli1	383.423	593.065	446.422	430.25	460.858	403.656
Stard13	135.908	147.271	116.678	141.227	139.596	83.1963
Tenm1	2.70016	0.995075	0	1.09478	0	0
Camk1g	0.900053	0	1.0146	3.28435	0	0
Diexf	304.218	350.267	282.058	238.663	267.719	263.968
Hsd11b1	577.834	607.991	682.823	1093.69	934.147	1050.74
Syt14	611.136	605.006	624.991	563.814	497.192	518.693
H2-M3	369.022	424.897	246.547	171.881	209.394	213.64
Lonrf3	30.6018	30.8473	21.3065	18.6113	15.2982	8.21692
Atp5e	2763.16	3651.93	3654.57	3929.18	4826.58	4622.02
Nelfcd	873.052	899.548	899.946	772.918	958.05	906.942
Tubb1	1.80011	1.99015	1.0146	3.28435	2.86841	3.08134
Ctsz	3133.98	3436	3120.9	2900.08	3282.42	3408.99
Prelid3b	2191.63	2369.27	2506.05	1982.65	2383.65	2198.03
Sertad4	118.807	122.394	77.1093	98.5306	48.763	59.5726
H2-M2	72.9043	21.8917	75.0801	82.1088	48.763	63.6811
Ube2a	854.15	1018.96	1075.47	989.685	1183.7	1115.45
Slc25a5	4000.74	4828.11	4272.46	3639.06	4216.57	4312.85
Atp1b4	0	0	0	0	0	0
Ppdpf	544.532	552.267	674.706	793.718	910.243	896.671
Kcnq2	88.2052	23.8818	2.02919	12.0426	12.4298	0
Eef1a2	248.415	71.6454	25.3649	42.6966	39.2016	27.7321
Col20a1	17.101	31.8424	28.4087	21.8957	18.1666	16.4338
Pls3	2069.22	1997.12	2103.26	1983.75	1941.92	1885.78
Mpped2	588.635	392.06	373.371	527.686	417.832	464.256
Nkap	834.349	869.696	932.413	856.121	887.296	997.328
Ndufa1	1369.88	1620.98	1769.45	1877.55	2121.67	2207.27
Wt1	14.4008	24.8769	9.13136	7.66349	1.91228	0
E2f3	441.026	432.858	431.203	355.805	349.946	377.978
Cr1l	1392.38	1547.34	1502.62	1554.59	1546.07	1561.21
Ppfibp1	2102.52	2166.28	2187.47	2405.24	2455.36	2368.53
Cd46	72.0042	36.8178	54.7882	47.0757	29.6403	35.949
Cd34	1769.5	1974.23	1500.59	1594.01	1329.03	1582.78
Plgrkt	465.327	375.143	444.393	453.241	501.972	475.554
Cd274	450.927	843.824	185.671	160.933	191.228	204.396
Pdcd1lg2	3.60021	0	0	0	0.956138	1.02711
Gtf3a	749.744	896.563	784.282	774.012	870.085	853.532
Mtif3	753.344	925.42	771.093	817.804	859.568	921.322
Lnx2	272.716	305.488	331.773	344.857	379.587	390.304
Il19	0	0.995075	0	0	0	1.02711
Dyrk3	255.615	286.582	201.905	330.625	291.622	306.08
Mapkapk2	5432.72	6345.6	7203.63	4732.75	5194.7	6516.01
Il10	1.80011	2.98523	0	4.37914	0	1.02711
Lamp2	10905.9	11832.4	10271.8	9561.84	9498.27	9627.14
Atxn10	2893.67	2743.42	2866.23	2941.68	3167.68	3149.13
Foxred2	171.91	138.315	135.956	130.279	193.14	141.742
Eif3d	2789.26	3204.14	2818.55	2465.45	2724.04	2617.09
H3f3b	7906.07	7926.77	6137.29	6230.42	5890.76	6752.25
Nup50	1111.57	1126.43	1106.92	941.514	1024.98	1107.23
Phf21b	37.8022	27.8621	33.4817	42.6966	40.1578	39.0304
Nlrp14	0	0	0	0	0	0
Ift27	252.915	240.808	281.043	437.914	392.973	446.795
Pacsin2	2032.32	2257.83	2106.3	2167.67	2255.53	2405.5
Cmah	7.20042	1.99015	12.1751	6.5687	19.1228	13.3525
Ttll12	1107.07	1236.88	1157.65	932.756	1044.1	1084.63
Bik	60.3036	53.7341	61.8903	86.4879	77.4472	77.0336
Scube1	120.607	104.483	125.81	87.5827	120.473	107.847
Tox4	1864.91	1910.54	1974.4	2069.14	1989.72	1865.24
Mrps18c	681.34	828.898	791.385	852.837	832.796	893.59
Sulf1	243.914	239.813	336.846	454.335	281.104	207.477
Srsf6	5460.62	5246.04	4718.88	3743.07	3810.21	3394.61
Plcg1	1251.07	1093.59	1295.64	1137.48	1219.08	1165.78
Kctd2	1007.16	987.115	1066.34	1363.01	1248.72	1417.42
Tmprss6	11.7007	7.9606	16.2335	27.3696	23.9034	26.705
Kctd5	418.525	436.838	356.123	370.037	388.192	428.307
Pom121l2	0	0	0	0	0	0
Etaa1	351.921	458.73	364.24	414.923	352.815	371.815
Matn4	3.60021	1.99015	4.05838	1.09478	1.91228	0
Svs4	0	0	0	0	0	0
Svs6	0	0	0	0	0	0
Slpi	65.7039	146.276	19.2773	9.85306	3.82455	1.02711
Svs3a	0	0	0	0	0	0
Svs5	0	0	1.0146	2.18957	0	0
Rbpjl	0	0	0	0	0	0
Sdc4	2306.84	2901.64	2379.23	2176.43	2132.19	2312.03
Ccdc70	0	0	0	0	0	0
Il13ra1	539.132	662.72	418.013	384.269	333.692	316.351
Prl5a1	0	0	0	0	0	0
Nbr1	3099.78	3280.76	3016.39	3131.08	3342.66	3324.77
Cyth1	522.031	491.567	523.531	545.202	473.288	532.045
Rnd3	1833.41	2247.88	1553.35	1203.17	1311.82	850.451
Brca1	35.1021	41.7932	51.7444	29.5592	35.3771	49.3015
Gast	0	0	0	0	0	1.02711
Cntnap1	99.9059	81.5962	67.9779	84.2984	44.9385	48.2744
Nt5c3b	1207.87	1092.59	1307.81	1717.72	1492.53	1690.63
Coa3	880.252	1101.55	1045.03	1082.74	1199	1312.65
Zpbp2	9.90058	13.9311	13.1897	4.37914	1.91228	13.3525
Gsdma	3.60021	0.995075	0	0	0.956138	1.02711
Med24	684.94	755.262	659.487	663.439	707.542	661.462
Gsdma2	0	0	0	0	0	0
Psmd3	2532.75	2801.14	2427.93	2071.33	2468.75	2359.28
Exosc10	937.855	1095.58	928.355	729.126	869.129	779.58
Glod4	1527.39	1513.51	1719.74	1589.63	1745.91	1811.83
Vps53	811.848	776.159	763.991	850.647	868.173	893.59
Taok1	2673.16	2554.36	3101.62	3180.35	2791.92	2578.06
Dnttip1	714.642	784.119	812.691	647.017	756.305	716.926
Tnnc2	0	0.995075	2.02919	1.09478	0	2.05423
Acot8	362.721	412.956	400.765	386.459	418.788	399.548
Cd300lg	1396.88	914.474	1780.62	1947.62	1604.4	1819.02
Spint4	0	0	0	0	0	0
Pyy	0	0	0	0	0	0
Mpp2	297.918	244.789	345.977	294.497	289.71	308.134
Ppy	0	0	0	0	0	0
Vtn	9.90058	2.98523	2.02919	10.9478	3.82455	4.10846
Nlk	1134.97	1028.91	1275.35	1255.72	1288.87	1161.67
Traf4	346.52	321.409	429.174	341.573	338.473	364.626
Aldoc	156.609	95.5272	159.292	206.914	240.947	224.938
Stac2	19.8012	11.9409	9.13136	2.18957	14.3421	2.05423
Rpl19	4493.07	5622.18	5260.68	5340.36	6106.85	6041.49
Nek8	340.22	307.478	364.24	361.279	421.657	395.439
Cacnb4	28.8017	10.9458	12.1751	30.654	27.728	28.7592
Plxdc1	185.411	152.247	214.08	432.44	373.85	390.304
Arl5b	680.44	576.149	768.049	863.785	673.121	779.58
Zfp207	3710.92	4167.38	3393.82	3281.07	3288.16	3126.54
Psmd11	1890.11	2309.57	1877	1629.04	1685.67	1630.03
C1qtnf1	165.61	113.439	226.255	239.758	206.526	178.718
Pipox	18.0011	12.936	36.5254	43.7914	49.7192	32.8677
Timp2	2520.15	1595.11	2312.26	4414.17	2952.55	3702.75
Zc3h18	848.75	837.854	781.239	578.046	816.542	642.974
Top2b	3492.21	3584.26	3580.51	3687.23	3792.04	3534.3
Rarb	256.515	131.35	250.605	257.274	306.92	176.664
Igfbp4	784.846	716.454	874.581	1356.44	1010.64	905.915
Cdc6	14.4008	16.9163	25.3649	15.327	9.56138	23.6236
Suz12	1882.91	1953.33	2003.83	1814.06	1805.19	1687.55
Atad5	122.407	94.5322	102.474	74.4453	101.351	79.0878
Crlf3	350.121	336.336	288.145	305.445	264.85	289.646
Krt27	0	0	0	0	0	0
Tns4	11.7007	6.96553	10.146	15.327	3.82455	8.21692
Tnfaip1	1915.31	1869.75	1891.21	1893.98	2028.92	1953.57
Abr	2333.84	1942.39	2064.7	2377.87	2005.98	2244.25
Rab11fip4	135.008	68.6602	93.3428	105.099	102.307	122.227
Cd40	288.917	376.139	81.1676	71.161	63.1051	63.6811
Slc35c2	1149.37	1260.76	1194.18	1232.73	1152.15	1314.71
Zfp334	240.314	261.705	220.167	205.819	222.78	218.775
Elmo2	785.746	733.371	712.246	668.913	716.147	766.227
Wsb1	1038.66	1068.71	930.384	746.643	644.437	620.377
Ttpal	1031.46	939.351	960.822	862.69	823.235	881.264
Rhot1	1992.72	2016.02	2177.32	1880.84	1868.29	1915.57
Hnf4g	0	0	0	0	0	0
Rhbdl3	144.909	112.444	110.591	134.658	147.245	134.552
Ada	116.107	151.251	117.693	145.606	147.245	159.203
Serinc3	36016.5	30307	37490.3	49229.2	41133	45974.7
Tha1	228.613	216.926	283.072	302.16	328.911	347.165
Pgs1	1348.28	1890.64	1373.76	1012.68	1004.9	1082.58
Birc5	31.5019	45.7735	50.7298	68.9714	31.5525	41.0846
Afmid	79.2047	33.8326	70.0071	60.2131	84.1401	83.1963
Trp53tg5	0	0	1.0146	0	0	0
Pigt	1314.08	1473.71	1409.27	1301.7	1367.28	1412.28
Wfdc2	0	0	0	1.09478	0	0
Etv4	15.3009	17.9114	27.3941	27.3696	15.2982	19.5152
Eppin	2.70016	4.97538	3.04379	13.1374	7.6491	10.2711
Dbndd2	47.7028	41.7932	54.7882	40.507	54.4998	33.8948
Mmp9	18.0011	30.8473	3.04379	8.75827	0.956138	3.08134
Slc12a5	131.408	89.5568	95.372	119.331	130.035	115.037
Ghdc	403.224	396.04	521.502	515.643	564.121	548.479
Pltp	175.51	204.986	147.116	246.326	154.894	119.145
Slc12a7	1238.47	1118.46	1127.22	1115.58	987.69	1217.13
Ctsa	2044.02	1735.41	2303.13	2514.72	2665.71	2708.5
Zswim1	328.519	281.606	263.795	259.464	269.631	290.673
Slc12a4	1652.5	1808.05	1770.47	1363.01	1529.82	1603.33
Spata25	0.900053	0	2.02919	2.18957	0.956138	0
Myo1c	4190.65	4564.41	4870.06	3722.27	3917.3	3988.29
Crk	4663.18	5095.78	5123.71	4472.19	4333.22	4189.6
Cox7c	1139.47	1448.83	1517.84	1447.3	1759.29	1792.31
Pitpna	3888.23	4152.45	4127.37	3877.73	3987.09	4171.11
Mlx	993.659	1168.22	1036.92	888.965	1093.82	1124.69
Retreg3	1451.79	1724.47	1491.46	1540.36	1418.91	1564.3
Jph2	114.307	103.488	100.445	134.658	115.693	109.901
Dhx58	3891.83	3981.3	2970.74	3142.03	3550.14	4117.7
Rab5a	1977.42	2077.72	2083.98	1852.37	1974.42	1847.78
Hspb9	0.900053	1.99015	1.0146	3.28435	1.91228	2.05423
Nkiras2	566.133	682.622	673.691	625.122	591.849	673.787
Ppp2r5c	2264.53	2044.88	2197.61	2463.26	2283.26	2222.68
Ift52	1111.57	950.297	1230.7	1386	1305.13	1410.23
Mybl2	16.201	20.8966	12.1751	17.5165	12.4298	13.3525
Sgk2	8.10048	15.9212	2.02919	0	8.60524	7.1898
Eya2	30.6018	29.8523	26.3795	27.3696	25.8157	30.8134
Prl3c1	0	0	0	0	0	0
B4galt5	2181.73	2013.04	2608.53	2571.65	2070.04	1829.29
Gdap1l1	30.6018	23.8818	16.2335	9.85306	15.2982	8.21692
Hnf4a	1.80011	0	0	1.09478	0	0
Ptgis	1310.48	989.105	1585.81	2569.46	2155.13	2320.25
Cadps2	78.3046	79.606	80.1531	51.4549	62.1489	30.8134
Ddx27	797.447	940.346	768.049	633.88	741.007	610.106
Cyth3	3460.7	3529.53	3375.56	3614.98	3241.31	2959.12
Cyth4	319.519	374.148	192.773	238.663	181.666	215.694
Rac3	63.9038	76.6208	81.1676	60.2131	55.456	47.2473
Rrp7a	1672.3	2092.64	1776.56	1631.23	1693.32	1708.09
Cyb5r3	5420.12	5626.16	6285.42	5996.13	7464.57	7257.59
Ints2	651.638	740.336	664.56	591.183	537.349	581.347
Med13l	720.042	778.149	629.049	821.088	714.235	656.326
Hist1h2bc	1160.17	1288.62	1454.93	1770.27	2204.85	2299.71
Baiap2l2	0	0	1.0146	0	0	0
Mafk	829.849	1088.61	809.647	1087.12	844.27	1046.63
Med1	1383.38	1452.81	1369.7	1415.56	1405.52	1419.47
Erbb3	53.1031	17.9114	16.2335	25.18	38.2455	27.7321
Stard3	491.429	503.508	477.875	446.672	436.955	443.713
Ikzf3	19.8012	10.9458	6.08757	5.47392	6.69296	8.21692
Mfng	217.813	213.941	218.138	200.345	149.157	187.962
Vmp1	2337.44	2483.71	2570.99	2583.69	2616.95	2610.93
Uchl5	758.745	755.262	867.479	800.287	869.129	855.586
Glrx2	1016.16	1035.87	1235.78	1236.01	1201.87	1213.02
Trove2	2210.53	2125.48	2434.01	2436.99	2098.72	2130.24
Stk4	1065.66	1161.25	1064.31	989.685	860.524	917.213
Wfdc15b	0	0	0	0	0	0
Pmp22	2589.45	2389.18	3075.24	4297.03	3727.98	4324.15
Gdf9	13.5008	17.9114	15.2189	7.66349	11.4737	18.4881
Zcchc10	314.119	356.237	309.452	278.075	308.832	333.812
Prl8a2	5.40032	2.98523	0	2.18957	0	0
Tbx5	0	0	0	1.09478	0	0
Psmb6	2956.67	3471.82	3348.17	3542.72	3684	3806.49
Spag7	1435.58	1630.93	1761.34	1632.32	1930.44	1914.54
Pfn1	7409.24	8695.96	7633.82	7254.04	8003.83	8378.17
Tomm34	571.534	579.134	560.057	620.743	697.98	662.489
Ywhab	8189.58	8075.04	8763.06	9531.19	9851.09	10168.4
Ksr1	259.215	278.621	198.861	289.023	240.947	288.619
Gpx3	1007.16	925.42	1238.82	1946.53	1001.08	1123.66
Anxa6	1440.99	1311.51	1135.33	1227.25	1300.35	1313.68
Il12rb2	6.30037	3.9803	5.07298	2.18957	2.86841	4.10846
Zkscan6	288.017	289.567	252.634	270.412	261.026	347.165
Kpna2	315.919	281.606	301.335	178.45	219.912	245.48
Smurf2	1161.07	1226.93	1302.74	1217.4	1153.1	1149.34
Cep95	170.11	180.109	161.321	178.45	165.412	186.935
Vezf1	102.606	89.5568	92.3282	66.7818	85.0963	50.3286
2210416O15Rik	288.917	263.695	353.079	299.971	283.017	255.752
Srsf1	177.31	244.789	121.751	93.0566	97.526	74.9794
Abi3	250.215	309.468	262.78	267.127	200.789	205.423
Shroom1	55.8033	23.8818	34.4963	17.5165	30.5964	25.6779
Kif3a	715.542	703.518	676.735	652.491	669.296	760.065
Sept8	1437.38	1433.9	1359.56	1334.54	1246.8	1291.08
Mtmr4	891.953	863.726	759.932	890.059	838.533	819.637
Mrm1	604.836	619.932	590.495	641.543	595.674	794.987
Mapt	731.743	538.336	894.873	1136.39	1585.28	1460.56
Kansl1	1260.97	1452.81	1505.66	1338.92	1481.06	1190.43
Gid4	1877.51	1936.42	2327.48	2498.3	2257.44	2290.47
Myo1b	2311.34	1918.51	2235.15	2558.51	2188.6	2172.35
Dhx40	1097.16	1154.29	1220.56	1345.49	1296.52	1184.26
Ypel2	339.32	375.143	549.911	532.065	529.7	338.948
Akap1	2640.76	2646.9	2360.96	2201.61	2283.26	2343.88
Nol11	766.845	897.558	768.049	592.278	642.525	649.136
Derl2	1927.91	2009.06	2182.4	2242.12	2123.58	2266.84
C1qbp	3428.3	4029.06	3599.79	3444.19	3718.42	3733.56
Rpain	210.612	294.542	293.218	357.994	322.218	337.921
6330403K07Rik	139.508	36.8178	30.4379	70.0662	41.1139	26.705
Slc13a3	13.5008	12.936	31.4525	49.2653	53.5437	61.6269
Kcnab3	379.822	424.897	485.991	598.847	751.524	573.13
Chd3	1681.3	1300.56	2045.42	2204.9	2110.2	1921.73
Kdm6b	605.736	438.828	480.918	572.572	525.876	686.113
1700125H20Rik	2.70016	1.99015	3.04379	8.75827	15.2982	4.10846
Appbp2	2484.15	2167.27	2262.55	2566.17	2533.76	2815.32
Wnt9b	25.2015	27.8621	10.146	40.507	28.6841	77.0336
Adora2b	15.3009	16.9163	6.08757	5.47392	2.86841	5.13557
Ncor1	3070.98	2903.63	2992.04	3322.67	3232.7	3159.4
Trpv2	75.6045	38.8079	48.7006	40.507	43.0262	47.2473
Cenpv	422.125	396.04	434.247	552.866	464.683	490.961
Pcgf2	390.623	408.976	368.298	453.241	441.736	446.795
Cwc25	594.035	570.178	628.035	568.193	590.893	670.706
1700001P01Rik	2.70016	0.995075	0	1.09478	0	3.08134
Pip4k2b	850.55	896.563	787.326	839.699	743.875	708.709
Trim37	720.943	713.469	699.056	659.06	786.901	589.564
Ybx2	9.00053	4.97538	14.2043	12.0426	2.86841	5.13557
Ctdnep1	1524.69	1569.23	1457.97	1545.84	1520.26	1523.21
Elp5	861.351	886.612	958.793	886.775	931.278	873.047
Slc2a4	274.516	151.251	355.108	525.496	337.517	476.581
Gabarap	5543.43	5922.69	6265.13	7238.71	6984.59	7565.73
Cldn7	0	0	0	1.09478	0.956138	4.10846
2810408A11Rik	7.20042	3.9803	11.1606	17.5165	19.1228	8.21692
Phf23	1163.77	1202.05	911.107	1094.78	1055.58	1352.71
Acadvl	4421.96	3966.37	4885.28	5083.08	5121.07	4948.64
Dnah11	0	0	2.02919	0	0.956138	0
G3bp1	3213.19	3572.32	3114.81	2744.62	2921	2828.67
Atox1	1134.97	1294.59	1258.1	1346.58	1555.64	1683.44
Glra2	0	0	0	0	0	0
Sparc	33311.9	36145.1	36470.7	41577.7	48745.8	50695.3
Glra4	2.70016	0.995075	4.05838	4.37914	0	1.02711
Mief2	791.147	919.45	880.669	813.425	1002.03	811.42
Tbx3	10708.8	8629.29	9572.71	13446.1	13123.9	14338.5
Mmp20	0	0	0	0	0	0
Mmp7	0	0	0	0	0	0
Crhr1	2.70016	0	0	0	0	0
Dusp14	303.318	261.705	323.656	279.17	267.719	380.032
Tada2a	394.223	315.439	398.736	436.819	374.806	427.28
Ikzf1	159.309	96.5223	101.46	98.5306	76.491	69.8438
Tcaf3	0	0	0	0	0	0
Pnpo	893.753	845.814	984.158	1023.62	989.602	976.786
Cog1	637.238	692.573	641.224	513.454	654.954	573.13
Cbx1	1532.79	1653.82	1634.51	1769.17	1946.7	1934.06
Cdk5rap3	1197.07	1121.45	1259.11	1186.75	1276.44	1285.95
Copz2	665.139	594.06	699.056	1005.01	1027.85	1135.99
Slc25a39	6414.68	7129.72	7468.44	6754.82	6944.43	7393.17
Sp2	412.224	395.045	393.663	400.691	353.771	338.948
Aatf	419.425	503.508	390.619	410.544	388.192	370.788
Lhx1	0	0	0	0	0	0
Dync1h1	5206.81	4910.7	5434.17	4817.05	5704.32	5180.77
Cpsf4l	6.30037	2.98523	2.02919	0	0.956138	0
Pex12	375.322	399.025	369.313	359.089	372.894	307.107
Ndel1	1305.98	1324.45	1540.16	1411.18	1489.66	1573.54
Slc25a35	175.51	173.143	213.065	226.62	245.727	238.291
Zbtb4	2326.64	2047.87	2367.05	2599.02	2473.53	2430.15
Tnfsfm13	15.3009	6.96553	10.146	17.5165	22.9473	23.6236
Mpdu1	1513.89	1724.47	1702.49	1843.62	1812.84	1841.62
Fxr2	1421.18	1398.08	1347.38	1287.47	1390.22	1531.43
Atp5g3	7845.76	8178.53	9330.22	8969.57	9522.18	10052.4
Cd68	247.515	232.848	192.773	238.663	186.447	277.321
Slc35g3	0	0	0	0	0	0
[truncated: 47,588 more rows]
