# Supplementary material for: Succinate mediates inflammation-induced adrenocortical dysfunction
Source: eLife journal article supplement (doi:10.7554/elife.83064), 2023-07-14
Supplement: supp [file Figure1_SourceData3.xlsx]

## Sheet: protein_abundance__filter by gr
Figure 1 - Source Data 3
Figure 1 C, E; 2 C; 3 B; 6 C: Proteomic analysis in adrenal cortex of PBS- and LPS-mice
			LPS 1	LPS 2	LPS 3	LPS 4	LPS 5	LPS 6	PBS 1	PBS 2	PBS 3	PBS 4	PBS 5	PBS 6
protein_id	fasta_headers	gene_symbols_or_id	adrencort_3_S1-A3_1_984.d	adrencort_4_S1-A4_1_985.d	adrencort_6_S1-A6_1_987.d	adrencort_7_S1-A7_1_988.d	adrencort_9_S1-A9_1_990.d	adrencort_12_S1-A12_1_993.d	adrencort_1_S1-A1_1_982.d	adrencort_2_S1-A2_1_983.d	adrencort_5_S1-A5_1_986.d	adrencort_8_S1-A8_1_989.d	adrencort_10_S1-A10_1_991.d	adrencort_11_S1-A11_1_992.d
A0A571BG59	A0A571BG59	A0A571BG59	12.2521	11.0937	12.8784	13.1836		13.2549	11.9467	11.7073	12.4951	13.1846	13.2112
A0A0J9YTR2	>tr|A0A0J9YTR2|A0A0J9YTR2_MOUSE RIKEN cDNA 0610012G03 gene OS=Mus musculus (Mouse) OX=10090 GN=0610012G03Rik PE=1 SV=1	0610012G03RIK	11.4724	11.2921	11.4424	10.7035	11.4343	9.75125	11.4546	11.2221	11.8353	11.7504	11.5812	11.7832
G3X8U3	>tr|G3X8U3|G3X8U3_MOUSE Queuosine salvage protein OS=Mus musculus (Mouse) OX=10090 GN=2210016F16Rik PE=1 SV=1	2210016F16RIK	10.9184	10.9694	11.5557	11.4017	11.4167	11.8962	11.2218	11.4501	11.1548	11.2977	11.4774	11.1058
B8JJ69	>tr|B8JJ69|B8JJ69_MOUSE RIKEN cDNA 2310061I04 gene OS=Mus musculus (Mouse) OX=10090 GN=2310061I04Rik PE=1 SV=1	2310061I04RIK	11.3709	11.8587	10.6955	11.021	11.6292	10.9999	11.3694	11.2315	12.1913	11.6293	11.8691	11.6681
E9PWP9	>tr|E9PWP9|E9PWP9_MOUSE FAM75 domain-containing protein OS=Mus musculus (Mouse) OX=10090 GN=4931408C20Rik PE=4 SV=1	4931408C20RIK	10.6071	10.4573		10.6793	10.457	11.0072	11.5722	10.7204	10.3315	11.4606	11.3566	10.57
A0A1W2P6U8	>tr|A0A1W2P6U8|A0A1W2P6U8_MOUSE RIKEN cDNA 4932415D10 gene OS=Mus musculus (Mouse) OX=10090 GN=4932415D10Rik PE=4 SV=1	4932415D10RIK	10.504	10.486	11.0062	10.2847		9.89101	10.0855	9.71514	10.7553	11.57	10.3434	9.5331
P58742	>sp|P58742|AAAS_MOUSE Aladin OS=Mus musculus (Mouse) OX=10090 GN=Aaas PE=1 SV=1	AAAS	11.2254	11.1161	11.3525	10.978	11.2074	11.2839	11.2841	11.2625	11.4743	11.0677	11.3467	11.2938
Q3UHJ0	>sp|Q3UHJ0|AAK1_MOUSE AP2-associated protein kinase 1 OS=Mus musculus (Mouse) OX=10090 GN=Aak1 PE=1 SV=2	AAK1	10.6679	10.1292	10.537	10.9781	10.6113	11.2024	10.7867	10.7731	10.6523	9.78762	10.7965	10.4725
J3QN89	>tr|J3QN89|J3QN89_MOUSE WD_REPEATS_REGION domain-containing protein OS=Mus musculus (Mouse) OX=10090 GN=Aamp PE=1 SV=1	AAMP	10.2681	9.40755	10.2387		9.60293	9.43819	10.1714	10.2514	9.18625		9.94894	9.59098
Q8BGQ7	>sp|Q8BGQ7|SYAC_MOUSE Alanine--tRNA ligase, cytoplasmic OS=Mus musculus (Mouse) OX=10090 GN=Aars PE=1 SV=1	AARS	12.1872	11.8475	11.7946	11.6399	11.8234	12.0981	11.4884	11.7135	11.5584	11.593	11.6273	11.4882
Q14CH7	>sp|Q14CH7|SYAM_MOUSE Alanine--tRNA ligase, mitochondrial OS=Mus musculus (Mouse) OX=10090 GN=Aars2 PE=1 SV=1	AARS2	9.94075	9.65325	10.7437	9.77576	10.5062	10.1746	10.4519	9.4821	10.0765	10.2233	10.4885	10.0133
Q3THG9	>sp|Q3THG9|AASD1_MOUSE Alanyl-tRNA editing protein Aarsd1 OS=Mus musculus (Mouse) OX=10090 GN=Aarsd1 PE=1 SV=2	AARSD1	10.9284	11.0572	11.2036	10.9954	10.758	10.7114	10.9413	10.951	10.8035	10.9598	11.09	10.8239
P61922	>sp|P61922|GABT_MOUSE 4-aminobutyrate aminotransferase, mitochondrial OS=Mus musculus (Mouse) OX=10090 GN=Abat PE=1 SV=1	ABAT	12.543	12.7126	12.4068	12.4242	12.5479	12.3985	12.7899	12.7302	12.88	12.2899	12.769	12.76
P41233	>sp|P41233|ABCA1_MOUSE Phospholipid-transporting ATPase ABCA1 OS=Mus musculus (Mouse) OX=10090 GN=Abca1 PE=1 SV=4	ABCA1	10.4945	10.3757		11.0728	11.0005	11.2424	10.8735	10.3427	10.7136	10.5405	10.7534	11.0998
Q9JI39	>sp|Q9JI39|ABCBA_MOUSE ATP-binding cassette sub-family B member 10, mitochondrial OS=Mus musculus (Mouse) OX=10090 GN=Abcb10 PE=1 SV=1	ABCB10	10.8571	11.3207	10.6297	10.7801	11.177	10.2604	10.9376	11.0282	11.5312	11.4181	11.3736	11.225
Q9QY30	>sp|Q9QY30|ABCBB_MOUSE Bile salt export pump OS=Mus musculus (Mouse) OX=10090 GN=Abcb11 PE=1 SV=2	ABCB11	14.3824	14.4555	14.2232	14.0101	14.2053	13.6987	14.1388	12.9803	14.9658	13.8099	13.3843	14.0809
P21447	>sp|P21447|MDR1A_MOUSE ATP-dependent translocase ABCB1 OS=Mus musculus (Mouse) OX=10090 GN=Abcb1a PE=1 SV=3	ABCB1A	12.0901	11.9314	12.2658	12.2018	12.024	11.8228	11.4707	10.8067	11.6152	11.6601	11.9156	11.332
P06795	>sp|P06795|MDR1B_MOUSE ATP-dependent translocase ABCB1 OS=Mus musculus (Mouse) OX=10090 GN=Abcb1b PE=1 SV=1	ABCB1B	13.5799	13.5882	13.7445	13.562	13.8343	13.7121	13.5442	12.4001	14.0653	13.7699	14.0058	14.0788
P06795;P21447	>sp|P06795|MDR1B_MOUSE ATP-dependent translocase ABCB1 OS=Mus musculus (Mouse) OX=10090 GN=Abcb1b PE=1 SV=1;>sp|P21447|MDR1A_MOUSE ATP-dependent translocase ABCB1 OS=Mus musculus (Mouse) OX=10090 GN=Abcb1a PE=1 SV=3	ABCB1B;ABCB1A	14.1422	14.2132	14.0493	13.777	14.1036	13.6698	13.9655	12.9087	14.5225	13.984	14.246	14.3188
P06795;P21440;P21447	>sp|P06795|MDR1B_MOUSE ATP-dependent translocase ABCB1 OS=Mus musculus (Mouse) OX=10090 GN=Abcb1b PE=1 SV=1;>sp|P21440|MDR3_MOUSE Phosphatidylcholine translocator ABCB4 OS=Mus musculus (Mouse) OX=10090 GN=Abcb4 PE=1 SV=2;>sp|P21447|MDR1A_MOUSE ATP-dependent translocase ABCB1 OS=Mus musculus (Mouse) OX=10090 GN=Abcb1a PE=1 SV=3	ABCB1B;ABCB4;ABCB1A	14.432	14.4966	14.8046	14.691	14.6552	14.5138	14.379	13.3015	14.9284	14.8072	14.9888	14.8751
P06795;P21440;P21447;Q9DC29	>sp|P06795|MDR1B_MOUSE ATP-dependent translocase ABCB1 OS=Mus musculus (Mouse) OX=10090 GN=Abcb1b PE=1 SV=1;>sp|P21440|MDR3_MOUSE Phosphatidylcholine translocator ABCB4 OS=Mus musculus (Mouse) OX=10090 GN=Abcb4 PE=1 SV=2;>sp|P21447|MDR1A_MOUSE ATP-dependent translocase ABCB1 OS=Mus musculus (Mouse) OX=10090 GN=Abcb1a PE=1 SV=3;>sp|Q9DC29|ABCB6_MOUSE ATP-binding cassette sub-family B member 6, mit…	ABCB1B;ABCB4;ABCB1A;ABCB6	15.3887	15.5168	15.9825	15.905	15.625	15.421	15.6469	14.519	15.9793	16.0308	16.1775	16.0717
B5X0E4	>sp|B5X0E4|ABCB5_MOUSE ATP-binding cassette sub-family B member 5 OS=Mus musculus (Mouse) OX=10090 GN=Abcb5 PE=2 SV=1	ABCB5	14.6877	14.8728		13.0194	13.8723	13.1076
Q9DC29	>sp|Q9DC29|ABCB6_MOUSE ATP-binding cassette sub-family B member 6, mitochondrial OS=Mus musculus (Mouse) OX=10090 GN=Abcb6 PE=1 SV=1	ABCB6	9.79899	9.6175	10.0648	9.83079	9.55889	9.67437	9.60219	9.23144	9.36848		10.0146	9.05444
Q61102	>sp|Q61102|ABCB7_MOUSE ATP-binding cassette sub-family B member 7, mitochondrial OS=Mus musculus (Mouse) OX=10090 GN=Abcb7 PE=1 SV=3	ABCB7	11.3904	11.5868	11.7547	11.6231	11.6724	11.1942	11.5622	11.3632	11.7637	11.6248	11.568	11.6271
Q9CXJ4	>sp|Q9CXJ4|MITOS_MOUSE Mitochondrial potassium channel ATP-binding subunit OS=Mus musculus (Mouse) OX=10090 GN=Abcb8 PE=1 SV=1	ABCB8	11.9219	11.976	12.0342	12.1217	12.2001	11.8201	12.0486	11.7926	12.3729	12.317	11.9576	12.2261
O35379	>sp|O35379|MRP1_MOUSE Multidrug resistance-associated protein 1 OS=Mus musculus (Mouse) OX=10090 GN=Abcc1 PE=1 SV=1	ABCC1	10.8931	11.0362	10.5436	10.3261	10.7555	10.4613	10.2134	10.219	10.3104	10.0542	10.3246	9.68121
E9Q236	>tr|E9Q236|E9Q236_MOUSE ATP-binding cassette, sub-family C (CFTR/MRP), member 4 OS=Mus musculus (Mouse) OX=10090 GN=Abcc4 PE=1 SV=1	ABCC4	10.6081	11.2141	10.7256	10.7129	10.7932	10.839	10.751	10.318	10.7545	10.4968	10.7473	10.3871
P48410	>sp|P48410|ABCD1_MOUSE ATP-binding cassette sub-family D member 1 OS=Mus musculus (Mouse) OX=10090 GN=Abcd1 PE=1 SV=1	ABCD1	12.1478	11.2864	12.0074	12.2904	10.9858	11.5897	11.2349	11.58	11.5772	11.8318	11.6948	12.2553
P55096	>sp|P55096|ABCD3_MOUSE ATP-binding cassette sub-family D member 3 OS=Mus musculus (Mouse) OX=10090 GN=Abcd3 PE=1 SV=2	ABCD3	11.4343	11.4844	11.646	11.4682	11.5339	11.3779	11.3173	11.3475	11.4191	11.1468	11.4859	11.2253
P61222	>sp|P61222|ABCE1_MOUSE ATP-binding cassette sub-family E member 1 OS=Mus musculus (Mouse) OX=10090 GN=Abce1 PE=1 SV=1	ABCE1	11.4866	11.4045	11.6677	11.8592	11.761	12.1087	11.4783	11.6133	11.3673	11.5565	11.4793	11.3788
Q6P542	>sp|Q6P542|ABCF1_MOUSE ATP-binding cassette sub-family F member 1 OS=Mus musculus (Mouse) OX=10090 GN=Abcf1 PE=1 SV=1	ABCF1	10.9928	10.9954	11.2519	11.1126	10.961	11.1703	11.0712	10.9391	11.0723	11.1197	11.064	10.85
Q99LE6	>sp|Q99LE6|ABCF2_MOUSE ATP-binding cassette sub-family F member 2 OS=Mus musculus (Mouse) OX=10090 GN=Abcf2 PE=1 SV=1	ABCF2	11.4801	11.3727	11.3078	11.1565	11.3758	11.3945	11.3534	11.1912	11.417	11.1449	11.2621	11.0887
Q8K268	>sp|Q8K268|ABCF3_MOUSE ATP-binding cassette sub-family F member 3 OS=Mus musculus (Mouse) OX=10090 GN=Abcf3 PE=1 SV=1	ABCF3	9.70611	10.2076	10.2063		10.3017	10.3268	10.5711	10.5247	10.4937	9.83331	10.4198	10.3569
Q7TMS5	>sp|Q7TMS5|ABCG2_MOUSE Broad substrate specificity ATP-binding cassette transporter ABCG2 OS=Mus musculus (Mouse) OX=10090 GN=Abcg2 PE=1 SV=1	ABCG2	11.721	11.8509	11.0222	10.789	11.2401	10.7969	11.1579	10.5503	11.07	10.5056	11.1575	10.0672
Q6PE15	>sp|Q6PE15|ABHDA_MOUSE Mycophenolic acid acyl-glucuronide esterase, mitochondrial OS=Mus musculus (Mouse) OX=10090 GN=Abhd10 PE=1 SV=1	ABHD10	11.7095	11.5611	11.8419	12.1432	11.9529	12.208	11.8962	11.3727	11.8959	12.1744	11.848	11.7902
Q8K4F5	>sp|Q8K4F5|ABHDB_MOUSE Protein ABHD11 OS=Mus musculus (Mouse) OX=10090 GN=Abhd11 PE=1 SV=1	ABHD11	12.2034	12.4653	12.1768	12.1267	12.4052	11.6389	12.2824	12.3894	12.5498	11.8345	12.2801	12.4941
Q99LR1	>sp|Q99LR1|ABD12_MOUSE Lysophosphatidylserine lipase ABHD12 OS=Mus musculus (Mouse) OX=10090 GN=Abhd12 PE=1 SV=2	ABHD12	11.9854	12.2129	12.1428	12.2328	12.3813	11.9991	11.9554	11.5178	11.9586	12.033	11.8466	11.9771
Q8VCR7	>sp|Q8VCR7|ABHEB_MOUSE Protein ABHD14B OS=Mus musculus (Mouse) OX=10090 GN=Abhd14b PE=1 SV=1	ABHD14B	12.0384	11.7595	11.0562	11.7051	11.8013	11.6827	11.9339	12.1843	12.0308	12.1743	12.1597	12.0729
Q9Z1Q2	>sp|Q9Z1Q2|ABHGA_MOUSE Phosphatidylserine lipase ABHD16A OS=Mus musculus (Mouse) OX=10090 GN=Abhd16a PE=1 SV=3	ABHD16A	12.2849	12.3923	12.0809	12.1106	12.2833	12.0329	12.1217	12.145	12.4844	12.1731	12.3037	12.3437
Q9QXM0	>sp|Q9QXM0|ABHD2_MOUSE Monoacylglycerol lipase ABHD2 OS=Mus musculus (Mouse) OX=10090 GN=Abhd2 PE=1 SV=1	ABHD2	10.8348	11.59	11.7187	11.8482	11.3795	11.0721	11.5844	11.2645	11.3187	11.415	11.7881	10.8931
Q91ZH7	>sp|Q91ZH7|ABHD3_MOUSE Phospholipase ABHD3 OS=Mus musculus (Mouse) OX=10090 GN=Abhd3 PE=1 SV=1	ABHD3	11.8843	11.8726	11.6285	11.1941	11.8841	11.5345	12.0645	11.8722	12.2714	11.9456	11.712	12.0061
Q8VD66	>sp|Q8VD66|ABHD4_MOUSE (Lyso)-N-acylphosphatidylethanolamine lipase OS=Mus musculus (Mouse) OX=10090 GN=Abhd4 PE=1 SV=1	ABHD4	12.153	12.1371	12.0708	12.2309	12.0789	11.9133	12.5654	12.3642	12.5264	12.4455	12.1809	12.4229
Q9DBL9	>sp|Q9DBL9|ABHD5_MOUSE 1-acylglycerol-3-phosphate O-acyltransferase ABHD5 OS=Mus musculus (Mouse) OX=10090 GN=Abhd5 PE=1 SV=1	ABHD5	12.2999	12.3211	10.9701	11.375	11.239	11.651	12.2783	12.5206	12.3649	11.5423	11.9087	12.1266
Q8R2Y0	>sp|Q8R2Y0|ABHD6_MOUSE Monoacylglycerol lipase ABHD6 OS=Mus musculus (Mouse) OX=10090 GN=Abhd6 PE=1 SV=1	ABHD6	11.6079	11.813	11.7636	11.5855	11.9607	11.4783	11.5811	11.6342	11.7238	11.3076	11.7369	11.7084
Q8CBW3	>sp|Q8CBW3|ABI1_MOUSE Abl interactor 1 OS=Mus musculus (Mouse) OX=10090 GN=Abi1 PE=1 SV=3	ABI1	11.6744	11.4722	11.8133	11.6528	11.5212	11.7241	11.382	11.0904	11.6868	11.5789	11.683	11.3664
Q5SSL4	>sp|Q5SSL4|ABR_MOUSE Active breakpoint cluster region-related protein OS=Mus musculus (Mouse) OX=10090 GN=Abr PE=1 SV=1	ABR	10.1833	11.0376	10.8067	10.1377	10.572	10.7301	10.9117	10.8614	10.5624	11.3934	10.4691	10.5916
Q5SSL4;Q6PAJ1	>sp|Q5SSL4|ABR_MOUSE Active breakpoint cluster region-related protein OS=Mus musculus (Mouse) OX=10090 GN=Abr PE=1 SV=1;>sp|Q6PAJ1|BCR_MOUSE Breakpoint cluster region protein OS=Mus musculus (Mouse) OX=10090 GN=Bcr PE=1 SV=3	ABR;BCR	11.0159	11.5646	11.0075	11.3722	11.4777	10.8145	11.5924	11.8712	11.0405	11.2858	11.9061	11.2844
Q4KML4	>sp|Q4KML4|ABRAL_MOUSE Costars family protein ABRACL OS=Mus musculus (Mouse) OX=10090 GN=Abracl PE=1 SV=1	ABRACL							10.8533	11.9057	11.512		10.4908	11.3238
Q3TCJ1	>sp|Q3TCJ1|ABRX2_MOUSE BRISC complex subunit Abraxas 2 OS=Mus musculus (Mouse) OX=10090 GN=Abraxas2 PE=1 SV=1	ABRAXAS2	10.8295	10.6147	11.2358	10.3031	10.8229	11.0605	10.7766	10.7455	10.9429	10.4833	11.1925	10.6766
Q7TQI7	>sp|Q7TQI7|ABTB2_MOUSE Ankyrin repeat and BTB/POZ domain-containing protein 2 OS=Mus musculus (Mouse) OX=10090 GN=Abtb2 PE=1 SV=1	ABTB2	10.3893	10.5381	10.9783	12.2713	10.7757	12.0029	11.1806	11.4296	11.9265	11.7101	12.0938	11.1652
Q921H8	>sp|Q921H8|THIKA_MOUSE 3-ketoacyl-CoA thiolase A, peroxisomal OS=Mus musculus (Mouse) OX=10090 GN=Acaa1a PE=1 SV=1	ACAA1A	14.3035	14.2452	14.4197	14.3239	14.462	14.3776	14.14	14.2491	14.3003	14.0319	13.937	14.288
Q8VCH0;Q921H8	>sp|Q8VCH0|THIKB_MOUSE 3-ketoacyl-CoA thiolase B, peroxisomal OS=Mus musculus (Mouse) OX=10090 GN=Acaa1b PE=1 SV=1;>sp|Q921H8|THIKA_MOUSE 3-ketoacyl-CoA thiolase A, peroxisomal OS=Mus musculus (Mouse) OX=10090 GN=Acaa1a PE=1 SV=1	ACAA1B;ACAA1A	13.8345	14.0196	13.4697	13.5491	13.8202	13.6065	13.807	13.8939	13.8017	13.547	13.6282	13.6544
Q8BWT1	>sp|Q8BWT1|THIM_MOUSE 3-ketoacyl-CoA thiolase, mitochondrial OS=Mus musculus (Mouse) OX=10090 GN=Acaa2 PE=1 SV=3	ACAA2	14.2097	14.6303	14.1654	14.2955	14.4322	13.9899	14.4585	14.3045	14.8524	14.4055	14.6184	14.7986
Q5SWU9	>sp|Q5SWU9|ACACA_MOUSE Acetyl-CoA carboxylase 1 OS=Mus musculus (Mouse) OX=10090 GN=Acaca PE=1 SV=1	ACACA							10.505	10.8144	10.3638	10.456	10.7653	10.0443
E9Q4Z2	>sp|E9Q4Z2|ACACB_MOUSE Acetyl-CoA carboxylase 2 OS=Mus musculus (Mouse) OX=10090 GN=Acacb PE=1 SV=1	ACACB							10.0405	10.1869	10.1935		10.4084	10.2364
E9Q4Z2;Q5SWU9	>sp|E9Q4Z2|ACACB_MOUSE Acetyl-CoA carboxylase 2 OS=Mus musculus (Mouse) OX=10090 GN=Acacb PE=1 SV=1;>sp|Q5SWU9|ACACA_MOUSE Acetyl-CoA carboxylase 1 OS=Mus musculus (Mouse) OX=10090 GN=Acaca PE=1 SV=1	ACACB;ACACA	11.4325	11.0912		10.4585	10.7271	9.8785	11.13	11.2252	11.3905	10.8331	10.6681	11.0686
Q8K370	>sp|Q8K370|ACD10_MOUSE Acyl-CoA dehydrogenase family member 10 OS=Mus musculus (Mouse) OX=10090 GN=Acad10 PE=1 SV=1	ACAD10	11.2677	11.3214	11.8642	11.7577	11.8943	11.0773	11.5554	11.4641	12.1092	11.8029	12.0473	11.9171
Q80XL6	>sp|Q80XL6|ACD11_MOUSE Acyl-CoA dehydrogenase family member 11 OS=Mus musculus (Mouse) OX=10090 GN=Acad11 PE=1 SV=2	ACAD11	11.5084	11.3392	12.1044	11.9902	11.7898	11.9506	11.4696	11.2145	11.5665	11.7893	11.7264	11.7159
D3Z7X0	>tr|D3Z7X0|D3Z7X0_MOUSE Acyl-Coenzyme A dehydrogenase family, member 12 OS=Mus musculus (Mouse) OX=10090 GN=Acad12 PE=1 SV=1	ACAD12	11.743	11.676	11.6826	13.0059	12.9272	12.0088	11.9784	11.6537	12.6387	12.5773	12.9626	12.674
Q9D7B6	>sp|Q9D7B6|ACAD8_MOUSE Isobutyryl-CoA dehydrogenase, mitochondrial OS=Mus musculus (Mouse) OX=10090 GN=Acad8 PE=1 SV=2	ACAD8	12.3482	12.6321	12.1384	12.5613	12.4956	12.3064	12.7199	12.7764	12.3887	12.6921	12.9397	12.7432
Q8JZN5	>sp|Q8JZN5|ACAD9_MOUSE Complex I assembly factor ACAD9, mitochondrial OS=Mus musculus (Mouse) OX=10090 GN=Acad9 PE=1 SV=2	ACAD9	12.6574	12.5897	12.9748	13.1348	13.065	12.7541	12.8236	12.7083	13.0769	13.0168	13.0299	12.9915
P51174	>sp|P51174|ACADL_MOUSE Long-chain specific acyl-CoA dehydrogenase, mitochondrial OS=Mus musculus (Mouse) OX=10090 GN=Acadl PE=1 SV=2	ACADL	14.2651	14.6218	14.8241	14.8186	15.0507	14.6668	14.5269	14.3426	14.8534	14.861	14.9017	14.9261
P45952	>sp|P45952|ACADM_MOUSE Medium-chain specific acyl-CoA dehydrogenase, mitochondrial OS=Mus musculus (Mouse) OX=10090 GN=Acadm PE=1 SV=1	ACADM	14.1246	14.3808	14.5195	14.6304	14.6104	14.0598	14.3858	14.2	14.7602	14.6654	14.7989	14.7526
Q07417	>sp|Q07417|ACADS_MOUSE Short-chain specific acyl-CoA dehydrogenase, mitochondrial OS=Mus musculus (Mouse) OX=10090 GN=Acads PE=1 SV=2	ACADS	14.003	14.1472	14.3053	14.6033	14.5839	14.2845	14.2814	14.1215	14.4601	14.5239	14.6468	14.5966
Q9DBL1	>sp|Q9DBL1|ACDSB_MOUSE Short/branched chain specific acyl-CoA dehydrogenase, mitochondrial OS=Mus musculus (Mouse) OX=10090 GN=Acadsb PE=1 SV=1	ACADSB	12.6328	12.7535	13.2677	13.4416	13.03	12.9436	12.8932	12.8598	13.2942	13.5097	13.1214	13.2172
P50544	>sp|P50544|ACADV_MOUSE Very long-chain specific acyl-CoA dehydrogenase, mitochondrial OS=Mus musculus (Mouse) OX=10090 GN=Acadvl PE=1 SV=3	ACADVL	12.9435	13.0276	13.0378	13.2292	13.134	13.083	12.6367	12.682	12.4445	12.8364	12.915	12.7945
Q61282	>sp|Q61282|PGCA_MOUSE Aggrecan core protein OS=Mus musculus (Mouse) OX=10090 GN=Acan PE=1 SV=2	ACAN							11.273	11.9745	12.066		12.0647	11.7952
Q8K2H4	>sp|Q8K2H4|ACAP1_MOUSE Arf-GAP with coiled-coil, ANK repeat and PH domain-containing protein 1 OS=Mus musculus (Mouse) OX=10090 GN=Acap1 PE=1 SV=1	ACAP1	11.924	11.8606	11.4275	11.7687	11.9387		11.3953	11.7949	11.6322	11.1759	11.6482	11.4017
Q6ZQK5	>sp|Q6ZQK5|ACAP2_MOUSE Arf-GAP with coiled-coil, ANK repeat and PH domain-containing protein 2 OS=Mus musculus (Mouse) OX=10090 GN=Acap2 PE=1 SV=2	ACAP2	10.9126	10.9369	10.7046		11.0261	10.2877	10.894	10.8231	11.6071	10.5991	11.703	11.8099
Q8QZT1	>sp|Q8QZT1|THIL_MOUSE Acetyl-CoA acetyltransferase, mitochondrial OS=Mus musculus (Mouse) OX=10090 GN=Acat1 PE=1 SV=1	ACAT1	13.8862	14.0835	14.3547	14.2922	14.1756	14.101	14.3325	14.3051	14.2777	14.4925	14.4373	14.3685
Q8CAY6	>sp|Q8CAY6|THIC_MOUSE Acetyl-CoA acetyltransferase, cytosolic OS=Mus musculus (Mouse) OX=10090 GN=Acat2 PE=1 SV=2	ACAT2	11.3473	10.9157	11.0044	11.3675	10.8072	10.8722	10.9644	11.6749	11.0969	10.8149	11.2744	10.856
Q8BMP6	>sp|Q8BMP6|GCP60_MOUSE Golgi resident protein GCP60 OS=Mus musculus (Mouse) OX=10090 GN=Acbd3 PE=1 SV=3	ACBD3	11.2554	11.1743	10.7086	11.0324	11.125	11.1442	11.1999	11.2165	10.9107	11.3384	11.0736	10.88
Q5XG73	>sp|Q5XG73|ACBD5_MOUSE Acyl-CoA-binding domain-containing protein 5 OS=Mus musculus (Mouse) OX=10090 GN=Acbd5 PE=1 SV=1	ACBD5							10.2649	9.91096	10.1729	10.1465	10.1663	8.94019
Q9JIX8	>sp|Q9JIX8|ACINU_MOUSE Apoptotic chromatin condensation inducer in the nucleus OS=Mus musculus (Mouse) OX=10090 GN=Acin1 PE=1 SV=3	ACIN1	10.8361	10.7391	10.893	11.1141	10.6914	10.9264	10.9785	11.0323	10.6628	11.127	11.2076	11.0797
Q9QUI6	>sp|Q9QUI6|ACKR1_MOUSE Atypical chemokine receptor 1 OS=Mus musculus (Mouse) OX=10090 GN=Ackr1 PE=2 SV=2	ACKR1	13.3792	13.4295	14.0271	13.2326	12.4601	12.3475	13.6068	13.7018	13.9653	13.838	12.2468	13.0571
Q91V92	>sp|Q91V92|ACLY_MOUSE ATP-citrate synthase OS=Mus musculus (Mouse) OX=10090 GN=Acly PE=1 SV=1	ACLY	13.5276	13.2837	13.0582	13.1593	13.1817	13.3695	12.9294	13.2142	13.0994	12.7647	12.9249	13.0497
P28271	>sp|P28271|ACOC_MOUSE Cytoplasmic aconitate hydratase OS=Mus musculus (Mouse) OX=10090 GN=Aco1 PE=1 SV=3	ACO1	12.2439	12.1358	11.9302	11.8718	12.0114	12.2252	12.3273	12.4835	12.1354	11.8598	11.9153	12.2714
Q99KI0	>sp|Q99KI0|ACON_MOUSE Aconitate hydratase, mitochondrial OS=Mus musculus (Mouse) OX=10090 GN=Aco2 PE=1 SV=1	ACO2	14.5714	14.7714	14.8777	14.9535	14.9109	14.714	14.891	14.8769	14.936	14.9042	15.0116	15.0147
Q9CQR4	>sp|Q9CQR4|ACO13_MOUSE Acyl-coenzyme A thioesterase 13 OS=Mus musculus (Mouse) OX=10090 GN=Acot13 PE=1 SV=1	ACOT13	12.448	12.3639	13.0495	12.4798	12.6818	12.456	12.5296	12.5616	12.913	13.4173	13.1471	12.9535
Q9QYR9	>sp|Q9QYR9|ACOT2_MOUSE Acyl-coenzyme A thioesterase 2, mitochondrial OS=Mus musculus (Mouse) OX=10090 GN=Acot2 PE=1 SV=2	ACOT2	12.2581	12.5928	12.3391	12.5755	12.388	11.9935	12.4481	12.2758	12.5047	12.2529	12.3725	12.5544
Q32Q92;Q9QYR9	>sp|Q32Q92|ACOT6_MOUSE Acyl-coenzyme A thioesterase 6 OS=Mus musculus (Mouse) OX=10090 GN=Acot6 PE=1 SV=1;>sp|Q9QYR9|ACOT2_MOUSE Acyl-coenzyme A thioesterase 2, mitochondrial OS=Mus musculus (Mouse) OX=10090 GN=Acot2 PE=1 SV=2	ACOT6;ACOT2	13.7792	14.0777	13.3929	13.2794	14.222	13.5122	13.8416	13.6559	14.2521	13.4236	14.0455	14.2498
Q91V12	>sp|Q91V12|BACH_MOUSE Cytosolic acyl coenzyme A thioester hydrolase OS=Mus musculus (Mouse) OX=10090 GN=Acot7 PE=1 SV=2	ACOT7	11.5756	11.4066	11.8903	10.8693	11.2213	11.3312	10.839	10.7962	10.9442	11.0043	10.92	10.8822
P58137	>sp|P58137|ACOT8_MOUSE Acyl-coenzyme A thioesterase 8 OS=Mus musculus (Mouse) OX=10090 GN=Acot8 PE=1 SV=1	ACOT8	10.9527	11.3114	11.1655	9.29206	11.0668	10.2168	11.1901	10.5182	10.6718	11.3888	11.1256	11.0973
Q9R0X4	>sp|Q9R0X4|ACOT9_MOUSE Acyl-coenzyme A thioesterase 9, mitochondrial OS=Mus musculus (Mouse) OX=10090 GN=Acot9 PE=1 SV=1	ACOT9	12.0826	12.424	12.2575	12.547	12.2628	12.2164	12.2017	12.11	12.2809	12.0962	12.0989	12.2752
Q9R0H0	>sp|Q9R0H0|ACOX1_MOUSE Peroxisomal acyl-coenzyme A oxidase 1 OS=Mus musculus (Mouse) OX=10090 GN=Acox1 PE=1 SV=5	ACOX1	11.9717	12.3469	11.6751	11.6962	12.0542	11.6568	11.3769	11.2164	11.7189	11.0799	11.5433	11.5263
Q9EPL9	>sp|Q9EPL9|ACOX3_MOUSE Peroxisomal acyl-coenzyme A oxidase 3 OS=Mus musculus (Mouse) OX=10090 GN=Acox3 PE=1 SV=2	ACOX3	11.5921	11.7052	11.2149	11.3821	11.6165	11.2803	11.5867	11.347	11.865	11.4887	11.7599	11.6903
Q9D358	>sp|Q9D358|PPAC_MOUSE Low molecular weight phosphotyrosine protein phosphatase OS=Mus musculus (Mouse) OX=10090 GN=Acp1 PE=1 SV=3	ACP1	13.4739	13.175	13.2262	11.4972	12.7574	12.8046	13.0445	13.098	13.1134	12.8175	12.8339	13.2729
P24638	>sp|P24638|PPAL_MOUSE Lysosomal acid phosphatase OS=Mus musculus (Mouse) OX=10090 GN=Acp2 PE=1 SV=2	ACP2	12.2861	12.282	12.3281	12.9063	12.5919	12.4364	11.9798	12.389	11.8402	12.7431	12.1615	12.2541
Q05117	>sp|Q05117|PPA5_MOUSE Tartrate-resistant acid phosphatase type 5 OS=Mus musculus (Mouse) OX=10090 GN=Acp5 PE=1 SV=2	ACP5	11.1723	10.0838		10.3535	9.23579	9.78255	10.3943	10.8183	10.3217	10.2163	9.93428	10.0025
Q8BP40	>sp|Q8BP40|PPA6_MOUSE Lysophosphatidic acid phosphatase type 6 OS=Mus musculus (Mouse) OX=10090 GN=Acp6 PE=1 SV=1	ACP6	11.8624	11.8925	12.1086	12.3406	12.1704	12.0477	12.0682	12.1	12.2687	12.2607	12.3338	12.3711
Q99PU5	>sp|Q99PU5|ACBG1_MOUSE Long-chain-fatty-acid--CoA ligase ACSBG1 OS=Mus musculus (Mouse) OX=10090 GN=Acsbg1 PE=1 SV=1	ACSBG1	12.8236	12.844	12.5501	12.5471	12.7845	12.4205	13.324	13.0953	13.4499	13.2351	13.4044	13.4595
Q8VCW8	>sp|Q8VCW8|ACSF2_MOUSE Medium-chain acyl-CoA ligase ACSF2, mitochondrial OS=Mus musculus (Mouse) OX=10090 GN=Acsf2 PE=1 SV=1	ACSF2	13.3906	13.5764	13.7312	13.9527	13.9406	13.3385	13.711	13.4686	13.909	13.8809	14.2009	13.9752
Q3URE1	>sp|Q3URE1|ACSF3_MOUSE Malonate--CoA ligase ACSF3, mitochondrial OS=Mus musculus (Mouse) OX=10090 GN=Acsf3 PE=1 SV=2	ACSF3	11.8187	12.0187	11.7975	11.7746	12.1384	11.8881	12.0552	11.856	12.3773	11.9618	12.0212	12.1093
P41216	>sp|P41216|ACSL1_MOUSE Long-chain-fatty-acid--CoA ligase 1 OS=Mus musculus (Mouse) OX=10090 GN=Acsl1 PE=1 SV=2	ACSL1	11.8498	12.1343	11.5568	11.8668	11.9694	11.7123	11.7219	11.5745	11.924	11.3759	11.5463	11.7162
P41216;Q8JZR0	>sp|P41216|ACSL1_MOUSE Long-chain-fatty-acid--CoA ligase 1 OS=Mus musculus (Mouse) OX=10090 GN=Acsl1 PE=1 SV=2;>sp|Q8JZR0|ACSL5_MOUSE Long-chain-fatty-acid--CoA ligase 5 OS=Mus musculus (Mouse) OX=10090 GN=Acsl5 PE=1 SV=1	ACSL1;ACSL5	13.281	13.1069	13.0704	13.3194	12.9652	13.3095	13.2762	12.6669	13.1567	12.661	12.6025	13.1607
Q9CZW4	>sp|Q9CZW4|ACSL3_MOUSE Long-chain-fatty-acid--CoA ligase 3 OS=Mus musculus (Mouse) OX=10090 GN=Acsl3 PE=1 SV=2	ACSL3							9.82533	9.88087	9.73892		10.2226	9.4852
Q9CZW4;Q9QUJ7	>sp|Q9CZW4|ACSL3_MOUSE Long-chain-fatty-acid--CoA ligase 3 OS=Mus musculus (Mouse) OX=10090 GN=Acsl3 PE=1 SV=2;>sp|Q9QUJ7|ACSL4_MOUSE Long-chain-fatty-acid--CoA ligase 4 OS=Mus musculus (Mouse) OX=10090 GN=Acsl4 PE=1 SV=2	ACSL3;ACSL4	13.6738	13.2661	13.6396	13.5008	13.5592	13.6138	12.5586	12.5826	12.5797	13.4079	13.2451	13.0164
Q9QUJ7	>sp|Q9QUJ7|ACSL4_MOUSE Long-chain-fatty-acid--CoA ligase 4 OS=Mus musculus (Mouse) OX=10090 GN=Acsl4 PE=1 SV=2	ACSL4	12.4137	12.2645	12.2001	11.9621	12.4471	12.2544	11.2511	11.2891	11.4262	11.5208	11.2869	11.5732
Q8JZR0	>sp|Q8JZR0|ACSL5_MOUSE Long-chain-fatty-acid--CoA ligase 5 OS=Mus musculus (Mouse) OX=10090 GN=Acsl5 PE=1 SV=1	ACSL5	11.496	11.7065	11.7565	11.825	10.7441	11.6628	10.7388	11.2351	11.4264	11.9609	11.0081	11.5559
Q99NB1	>sp|Q99NB1|ACS2L_MOUSE Acetyl-coenzyme A synthetase 2-like, mitochondrial OS=Mus musculus (Mouse) OX=10090 GN=Acss1 PE=1 SV=1	ACSS1	11.0964	11.366	11.6651	11.7044	11.7984	10.9368	11.0473	10.9833	12.0858	11.9478	11.1091	11.5877
Q9QXG4	>sp|Q9QXG4|ACSA_MOUSE Acetyl-coenzyme A synthetase, cytoplasmic OS=Mus musculus (Mouse) OX=10090 GN=Acss2 PE=1 SV=2	ACSS2	10.5683	10.1228	10.8412	11.6906	10.7617	11.3459	10.2462	10.9337	9.88086	10.5867	10.9354	10.5014
P68134	>sp|P68134|ACTS_MOUSE Actin, alpha skeletal muscle OS=Mus musculus (Mouse) OX=10090 GN=Acta1 PE=1 SV=1	ACTA1	16.7395	16.7222	16.449	16.9639	17.3938	17.7561	16.4364	16.2069	16.4956	16.2871	16.8625	16.8009
P60710;P63260	>sp|P60710|ACTB_MOUSE Actin, cytoplasmic 1 OS=Mus musculus (Mouse) OX=10090 GN=Actb PE=1 SV=1;>sp|P63260|ACTG_MOUSE Actin, cytoplasmic 2 OS=Mus musculus (Mouse) OX=10090 GN=Actg1 PE=1 SV=1	ACTB;ACTG1	16.115	15.9832	16.2209	16.1592	15.9966	16.3767	15.5906	15.8742	15.7245	16.0049	15.8255	15.7918
Q8BFZ3	>sp|Q8BFZ3|ACTBL_MOUSE Beta-actin-like protein 2 OS=Mus musculus (Mouse) OX=10090 GN=Actbl2 PE=1 SV=1	ACTBL2	16.3361	16.2681	15.5334	15.5429	15.9667	16.1039	15.7178	16.0278	15.9895	15.0705	15.4334	15.8748
P63268	>sp|P63268|ACTH_MOUSE Actin, gamma-enteric smooth muscle OS=Mus musculus (Mouse) OX=10090 GN=Actg2 PE=1 SV=1	ACTG2	13.1651	13.5929	13.1362	13.2297	13.4818	12.6971	12.7178	12.7396	12.8356	12.0509	12.139	12.646
P63268;P68134	>sp|P63268|ACTH_MOUSE Actin, gamma-enteric smooth muscle OS=Mus musculus (Mouse) OX=10090 GN=Actg2 PE=1 SV=1;>sp|P68134|ACTS_MOUSE Actin, alpha skeletal muscle OS=Mus musculus (Mouse) OX=10090 GN=Acta1 PE=1 SV=1	ACTG2;ACTA1	16.6479	16.4772	16.7776	16.7223	16.3784	16.6943	16.1081	16.3283	16.1073	16.4493	16.3694	16.3362
P63268;P68134;Q8BFZ3	>sp|P63268|ACTH_MOUSE Actin, gamma-enteric smooth muscle OS=Mus musculus (Mouse) OX=10090 GN=Actg2 PE=1 SV=1;>sp|P68134|ACTS_MOUSE Actin, alpha skeletal muscle OS=Mus musculus (Mouse) OX=10090 GN=Acta1 PE=1 SV=1;>sp|Q8BFZ3|ACTBL_MOUSE Beta-actin-like protein 2 OS=Mus musculus (Mouse) OX=10090 GN=Actbl2 PE=1 SV=1	ACTG2;ACTA1;ACTBL2	14.9724	14.8525	14.9023	15.0136	15.1938	15.4503	14.823	14.6748	14.3607	14.542	14.8846	14.8377
P63268;Q8BFZ3	>sp|P63268|ACTH_MOUSE Actin, gamma-enteric smooth muscle OS=Mus musculus (Mouse) OX=10090 GN=Actg2 PE=1 SV=1;>sp|Q8BFZ3|ACTBL_MOUSE Beta-actin-like protein 2 OS=Mus musculus (Mouse) OX=10090 GN=Actbl2 PE=1 SV=1	ACTG2;ACTBL2	16.9746	16.9083	17.5772	17.5782	17.0512	17.4837	16.678	16.8964	16.599	17.3502	17.1877	16.9069
Q9Z2N8	>sp|Q9Z2N8|ACL6A_MOUSE Actin-like protein 6A OS=Mus musculus (Mouse) OX=10090 GN=Actl6a PE=1 SV=2	ACTL6A	11.6924	11.6035	11.5885	11.6713	11.6074	11.7272	11.5944	11.5156	11.3991	11.8431	11.7964	11.4801
Q7TPR4	>sp|Q7TPR4|ACTN1_MOUSE Alpha-actinin-1 OS=Mus musculus (Mouse) OX=10090 GN=Actn1 PE=1 SV=1	ACTN1	11.7944	11.7407	10.9292	11.4229	11.3007	11.5511	10.9467	11.0569	10.9092	10.9497	10.8216	10.8955
Q7TPR4;Q9JI91	>sp|Q7TPR4|ACTN1_MOUSE Alpha-actinin-1 OS=Mus musculus (Mouse) OX=10090 GN=Actn1 PE=1 SV=1;>sp|Q9JI91|ACTN2_MOUSE Alpha-actinin-2 OS=Mus musculus (Mouse) OX=10090 GN=Actn2 PE=1 SV=2	ACTN1;ACTN2	12.3042	12.1928	11.5082	11.6224	12.0058	12.1293	10.6559	10.8757	11.0602	11.8171	11.1705	11.3081
P57780	>sp|P57780|ACTN4_MOUSE Alpha-actinin-4 OS=Mus musculus (Mouse) OX=10090 GN=Actn4 PE=1 SV=1	ACTN4	13.0022	12.9603	12.5525	12.5538	12.6925	12.9151	13.0085	13.0277	12.8393	12.6004	12.7363	12.9219
P57780;Q7TPR4	>sp|P57780|ACTN4_MOUSE Alpha-actinin-4 OS=Mus musculus (Mouse) OX=10090 GN=Actn4 PE=1 SV=1;>sp|Q7TPR4|ACTN1_MOUSE Alpha-actinin-1 OS=Mus musculus (Mouse) OX=10090 GN=Actn1 PE=1 SV=1	ACTN4;ACTN1	13.9786	13.8302	13.4983	13.827	13.6875	13.917	13.5746	13.5775	13.4163	13.6426	13.6056	13.6132
P57780;Q7TPR4;Q9JI91	>sp|P57780|ACTN4_MOUSE Alpha-actinin-4 OS=Mus musculus (Mouse) OX=10090 GN=Actn4 PE=1 SV=1;>sp|Q7TPR4|ACTN1_MOUSE Alpha-actinin-1 OS=Mus musculus (Mouse) OX=10090 GN=Actn1 PE=1 SV=1;>sp|Q9JI91|ACTN2_MOUSE Alpha-actinin-2 OS=Mus musculus (Mouse) OX=10090 GN=Actn2 PE=1 SV=2	ACTN4;ACTN1;ACTN2	13.0935	13.2778	12.4658	12.8304	12.698	12.7547	12.8472	12.9277	12.8682	12.6073	12.3418	12.9109
P57780;Q9JI91	>sp|P57780|ACTN4_MOUSE Alpha-actinin-4 OS=Mus musculus (Mouse) OX=10090 GN=Actn4 PE=1 SV=1;>sp|Q9JI91|ACTN2_MOUSE Alpha-actinin-2 OS=Mus musculus (Mouse) OX=10090 GN=Actn2 PE=1 SV=2	ACTN4;ACTN2	11.2683	11.313	10.8861	11.3829	11.4528	11.3547	11.562	11.7263	11.1976	11.4325	11.7663	11.5634
Q9QZB7	>sp|Q9QZB7|ARP10_MOUSE Actin-related protein 10 OS=Mus musculus (Mouse) OX=10090 GN=Actr10 PE=1 SV=2	ACTR10	11.1543	11.6321	11.2768	11.3917	11.5299	11.2411	11.4118	11.0608	10.8093	10.7244	10.624	9.9947
P61164	>sp|P61164|ACTZ_MOUSE Alpha-centractin OS=Mus musculus (Mouse) OX=10090 GN=Actr1a PE=1 SV=1	ACTR1A	11.2579	11.1055	10.2419	10.9156	10.4873	10.2747	10.6297	10.818	10.5652	10.722	10.2622	10.2704
P61164;Q8R5C5	>sp|P61164|ACTZ_MOUSE Alpha-centractin OS=Mus musculus (Mouse) OX=10090 GN=Actr1a PE=1 SV=1;>sp|Q8R5C5|ACTY_MOUSE Beta-centractin OS=Mus musculus (Mouse) OX=10090 GN=Actr1b PE=1 SV=1	ACTR1A;ACTR1B	12.5676	12.3113	12.8404	13.0026	12.7291	13.1581	12.513	12.4342	12.1067	13.1255	12.4642	12.2074
Q8R5C5	>sp|Q8R5C5|ACTY_MOUSE Beta-centractin OS=Mus musculus (Mouse) OX=10090 GN=Actr1b PE=1 SV=1	ACTR1B	11.8284	11.2527		10.6157	10.3898	10.531	10.7462	11.1047	10.6524	10.377	10.4163	10.3214
P61161	>sp|P61161|ARP2_MOUSE Actin-related protein 2 OS=Mus musculus (Mouse) OX=10090 GN=Actr2 PE=1 SV=1	ACTR2	13.1486	12.7775	12.7693	12.869	12.7371	13.0745	12.7751	12.4327	12.5148	12.34	12.3855	12.5518
Q99JY9	>sp|Q99JY9|ARP3_MOUSE Actin-related protein 3 OS=Mus musculus (Mouse) OX=10090 GN=Actr3 PE=1 SV=3	ACTR3	12.5147	12.4021	12.4091	12.3744	12.0531	12.81	12.2071	12.4225	12.1858	12.107	12.3749	12.0615
Q91XE4	>sp|Q91XE4|ACY3_MOUSE N-acyl-aromatic-L-amino acid amidohydrolase (carboxylate-forming) OS=Mus musculus (Mouse) OX=10090 GN=Acy3 PE=1 SV=1	ACY3	12.5618	11.6814	12.58	11.6388	12.2756	12.8949	12.1519	12.7063	11.7332	11.4177	12.481	12.3827
P56376	>sp|P56376|ACYP1_MOUSE Acylphosphatase-1 OS=Mus musculus (Mouse) OX=10090 GN=Acyp1 PE=1 SV=2	ACYP1	11.1535	10.7124	11.1137	10.352	10.5572	10.3564	10.5776	10.9167	10.6953	10.9533	10.7858	10.2977
P56375	>sp|P56375|ACYP2_MOUSE Acylphosphatase-2 OS=Mus musculus (Mouse) OX=10090 GN=Acyp2 PE=1 SV=2	ACYP2	10.4863	9.95049	10.2486		9.61697	10.4882	9.83999	10.0951	10.3106	11.0415	10.1451	10.0805
P03958	>sp|P03958|ADA_MOUSE Adenosine deaminase OS=Mus musculus (Mouse) OX=10090 GN=Ada PE=1 SV=3	ADA							11.3978	11.6922	11.6634		11.2271	11.2825
O35598	>sp|O35598|ADA10_MOUSE Disintegrin and metalloproteinase domain-containing protein 10 OS=Mus musculus (Mouse) OX=10090 GN=Adam10 PE=1 SV=2	ADAM10	11.9912	11.9692	12.2779	11.7763	11.4526	11.6485
Q9Z0F8	>sp|Q9Z0F8|ADA17_MOUSE Disintegrin and metalloproteinase domain-containing protein 17 OS=Mus musculus (Mouse) OX=10090 GN=Adam17 PE=1 SV=3	ADAM17	12.3227	11.5828	11.434	12.1577	12.2162	12.0322	11.7475	11.1863	11.6662	10.5991	11.8127	11.0346
Q99MU3	>sp|Q99MU3|DSRAD_MOUSE Double-stranded RNA-specific adenosine deaminase OS=Mus musculus (Mouse) OX=10090 GN=Adar PE=1 SV=2	ADAR	11.7663	11.432	13.2146	13.1818	12.7409	13.2614
Q91ZS8	>sp|Q91ZS8|RED1_MOUSE Double-stranded RNA-specific editase 1 OS=Mus musculus (Mouse) OX=10090 GN=Adarb1 PE=1 SV=1	ADARB1	10.8229	10.4239	10.068		10.5137	11.2389	10.0884	9.88822	9.55715		10.3778	10.1691
Q9D0L4	>sp|Q9D0L4|ADCK1_MOUSE AarF domain-containing protein kinase 1 OS=Mus musculus (Mouse) OX=10090 GN=Adck1 PE=1 SV=1	ADCK1	10.0343	10.523	10.8362	10.9503	10.5541	10.0682	10.3249	10.0252	10.6676	9.84819	10.3876	10.492
Q80V03	>sp|Q80V03|ADCK5_MOUSE Uncharacterized aarF domain-containing protein kinase 5 OS=Mus musculus (Mouse) OX=10090 GN=Adck5 PE=2 SV=2	ADCK5	11.4201	11.6233	11.6976	11.6837	11.8917	11.6683	11.7622	11.4026	11.9536	11.7697	12.0175	12.0431
P51830	>sp|P51830|ADCY9_MOUSE Adenylate cyclase type 9 OS=Mus musculus (Mouse) OX=10090 GN=Adcy9 PE=1 SV=1	ADCY9	10.3262	10.1187	10.2688	11.0045	10.6047	10.4583	10.5606	10.3236	10.6811	10.5245	10.6019	10.477
Q9QYC0	>sp|Q9QYC0|ADDA_MOUSE Alpha-adducin OS=Mus musculus (Mouse) OX=10090 GN=Add1 PE=1 SV=2	ADD1	11.3194	11.1026	10.469	11.1246	10.9935	11.1761	10.3944	10.721	10.5579	10.7879	10.4906	10.427
Q9QYB5	>sp|Q9QYB5|ADDG_MOUSE Gamma-adducin OS=Mus musculus (Mouse) OX=10090 GN=Add3 PE=1 SV=2	ADD3	10.6062	10.3225	10.7745	10.7783	10.6594	11.1019
G3UZ78	>sp|G3UZ78|ADGB_MOUSE Androglobin OS=Mus musculus (Mouse) OX=10090 GN=Adgb PE=1 SV=1	ADGB	13.2315	11.9453	14.4961	14.5755	13.5345	14.1109
B7ZCC9	>sp|B7ZCC9|AGRG4_MOUSE Adhesion G-protein coupled receptor G4 OS=Mus musculus (Mouse) OX=10090 GN=Adgrg4 PE=3 SV=1	ADGRG4	12.9942	13.0699	15.2414	14.5212	12.8982	13.0342	12.82	12.9127	13.0799	14.225	14.0209	12.3432
Q8JZZ7	>sp|Q8JZZ7|AGRL2_MOUSE Adhesion G protein-coupled receptor L2 OS=Mus musculus (Mouse) OX=10090 GN=Adgrl2 PE=1 SV=3	ADGRL2	11.8895	11.7859	11.4419	11.4427	11.4537	11.3493	10.864	10.9633	10.5075	11.0219	10.5709	10.6465
P00329	>sp|P00329|ADH1_MOUSE Alcohol dehydrogenase 1 OS=Mus musculus (Mouse) OX=10090 GN=Adh1 PE=1 SV=2	ADH1	14.6451	14.6291	15.3086	15.3252	15.1768	15.0389	14.6745	14.8952	14.6429	14.8809	14.6289	14.5729
P28474	>sp|P28474|ADHX_MOUSE Alcohol dehydrogenase class-3 OS=Mus musculus (Mouse) OX=10090 GN=Adh5 PE=1 SV=3	ADH5	13.0968	12.751	12.9738	13.3767	13.0427	13.416	13.2181	13.3368	12.9522	13.2195	13.1953	13.2841
Q8R0N6	>sp|Q8R0N6|HOT_MOUSE Hydroxyacid-oxoacid transhydrogenase, mitochondrial OS=Mus musculus (Mouse) OX=10090 GN=Adhfe1 PE=1 SV=2	ADHFE1	10.8362	11.2767	10.4415	10.6512	10.9929	10.3047	11.2764	11.2433	11.6217	10.8998	11.1563	11.3766
Q99JT9	>sp|Q99JT9|MTND_MOUSE 1,2-dihydroxy-3-keto-5-methylthiopentene dioxygenase OS=Mus musculus (Mouse) OX=10090 GN=Adi1 PE=1 SV=1	ADI1	10.7233	8.92257	10.0003		10.8017	9.55993
P55264	>sp|P55264|ADK_MOUSE Adenosine kinase OS=Mus musculus (Mouse) OX=10090 GN=Adk PE=1 SV=2	ADK	11.6525	11.4141	11.4548	11.6156	11.3053	11.9877	11.8055	11.9373	11.6294	11.893	11.9132	11.8642
Q6PDY2	>sp|Q6PDY2|AEDO_MOUSE 2-aminoethanethiol dioxygenase OS=Mus musculus (Mouse) OX=10090 GN=Ado PE=1 SV=2	ADO	11.5884	11.6591	11.59	11.2117	11.6949	10.8774	11.6767	11.5315	11.8981	11.0584	11.5715	11.9894
Q8VDL4	>sp|Q8VDL4|ADPGK_MOUSE ADP-dependent glucokinase OS=Mus musculus (Mouse) OX=10090 GN=Adpgk PE=1 SV=2	ADPGK	11.1223	11.6353	11.8489	11.4232	11.9443	11.6493	11.081	10.8453	11.4711	11.3561	11.654	11.142
P54923	>sp|P54923|ADPRH_MOUSE [Protein ADP-ribosylarginine] hydrolase OS=Mus musculus (Mouse) OX=10090 GN=Adprh PE=1 SV=1	ADPRH	12.4342	11.9377	11.2557	10.2848	11.6454	11.6391	11.6355	11.9399	11.3116	11.2573	11.0249	11.057
Q8CG72	>sp|Q8CG72|ARHL2_MOUSE ADP-ribose glycohydrolase ARH3 OS=Mus musculus (Mouse) OX=10090 GN=Adprhl2 PE=1 SV=1	ADPRHL2	11.273	11.5953	11.1798	11.1355	11.2912	11.319	11.4161	10.9847	11.4682	11.3706	11.0891	11.6244
Q9JKV1	>sp|Q9JKV1|ADRM1_MOUSE Proteasomal ubiquitin receptor ADRM1 OS=Mus musculus (Mouse) OX=10090 GN=Adrm1 PE=1 SV=2	ADRM1	12.3918	11.5419	11.311	11.0025	11.3639	11.594	12.1844	11.514	11.2837	11.7682	11.9853	11.2127
P54822	>sp|P54822|PUR8_MOUSE Adenylosuccinate lyase OS=Mus musculus (Mouse) OX=10090 GN=Adsl PE=1 SV=2	ADSL	11.7293	11.6209	11.3763	11.6182	11.4248	11.6331	11.7357	11.9028	11.3958	11.0403	11.5037	11.5064
P28650	>sp|P28650|PURA1_MOUSE Adenylosuccinate synthetase isozyme 1 OS=Mus musculus (Mouse) OX=10090 GN=Adss1 PE=1 SV=2	ADSS1	10.5508	10.7818	11.1486	10.4241	10.9352	10.5887	10.7365	11.1077	10.7298	11.0924	11.0337	11.0211
P46664	>sp|P46664|PURA2_MOUSE Adenylosuccinate synthetase isozyme 2 OS=Mus musculus (Mouse) OX=10090 GN=Adss2 PE=1 SV=2	ADSS2	12.3002	12.2258	11.828	11.4318	12.3025	12.5227	12.0214	12.1475	12.0741	11.4965	11.6868	12.0111
Q640N1	>sp|Q640N1|AEBP1_MOUSE Adipocyte enhancer-binding protein 1 OS=Mus musculus (Mouse) OX=10090 GN=Aebp1 PE=1 SV=1	AEBP1	10.7567	10.9966	11.3021	10.4181	11.1276	11.1163	10.4521	10.6298	11.0502	11.1921	10.8389	10.4214
Q9QZQ1	>sp|Q9QZQ1|AFAD_MOUSE Afadin OS=Mus musculus (Mouse) OX=10090 GN=Afdn PE=1 SV=3	AFDN	10.5038	10.0776	10.3932	10.5666	10.646	10.2725	10.558	10.1932	10.5128	10.9119	11.1077	10.1984
Q3V384	>sp|Q3V384|AFG1L_MOUSE AFG1-like ATPase OS=Mus musculus (Mouse) OX=10090 GN=Afg1l PE=1 SV=1	AFG1L	11.3434	11.5654	11.1004	11.5071	11.2629	11.1169	11.3876	11.3856	11.3978	11.0022	11.2716	11.237
Q920A7	>sp|Q920A7|AFG31_MOUSE AFG3-like protein 1 OS=Mus musculus (Mouse) OX=10090 GN=Afg3l1 PE=1 SV=2	AFG3L1	11.3629	11.5982	11.7441	11.6026	11.7553	11.4197	11.4859	11.2618	11.7842	11.2994	11.6597	11.5819
Q8JZQ2	>sp|Q8JZQ2|AFG32_MOUSE AFG3-like protein 2 OS=Mus musculus (Mouse) OX=10090 GN=Afg3l2 PE=1 SV=1	AFG3L2	12.0191	12.1941	12.4309	12.4516	12.2877	12.0092	12.259	12.1513	12.531	12.5417	12.4065	12.4319
Q8JZQ2;Q920A7	>sp|Q8JZQ2|AFG32_MOUSE AFG3-like protein 2 OS=Mus musculus (Mouse) OX=10090 GN=Afg3l2 PE=1 SV=1;>sp|Q920A7|AFG31_MOUSE AFG3-like protein 1 OS=Mus musculus (Mouse) OX=10090 GN=Afg3l1 PE=1 SV=2	AFG3L2;AFG3L1	11.6321	12.0556	12.1384	11.7623	11.9446	11.4875	12.1416	12.0239	12.0202	12.279	11.9522	12.2238
Q64191	>sp|Q64191|ASPG_MOUSE N(4)-(beta-N-acetylglucosaminyl)-L-asparaginase OS=Mus musculus (Mouse) OX=10090 GN=Aga PE=1 SV=1	AGA							10.7285	10.4492	10.6124	11.2752	10.4732	10.7143
Q8BXK8;Q8VHH5	>sp|Q8BXK8|AGAP1_MOUSE Arf-GAP with GTPase, ANK repeat and PH domain-containing protein 1 OS=Mus musculus (Mouse) OX=10090 GN=Agap1 PE=1 SV=1;>sp|Q8VHH5|AGAP3_MOUSE Arf-GAP with GTPase, ANK repeat and PH domain-containing protein 3 OS=Mus musculus (Mouse) OX=10090 GN=Agap3 PE=1 SV=1	AGAP1;AGAP3	9.63787	8.95396		9.33625	9.44781	9.46103	9.9158	8.83334	8.80769	10.2253	10.0599	9.50351
Q8K2K6	>sp|Q8K2K6|AGFG1_MOUSE Arf-GAP domain and FG repeat-containing protein 1 OS=Mus musculus (Mouse) OX=10090 GN=Agfg1 PE=1 SV=2	AGFG1	11.2932	11.1291	10.6168	10.7095	10.5912	11.4741	11.4335	11.0628	10.5541	10.7579	11.252	10.5946
Q80WC7	>sp|Q80WC7|AGFG2_MOUSE Arf-GAP domain and FG repeat-containing protein 2 OS=Mus musculus (Mouse) OX=10090 GN=Agfg2 PE=1 SV=1	AGFG2	10.5332	10.2616	10.1106		9.82265	9.72278	10.8728	10.5848	10.4849		9.9433	10.1519
Q9ESW4	>sp|Q9ESW4|AGK_MOUSE Acylglycerol kinase, mitochondrial OS=Mus musculus (Mouse) OX=10090 GN=Agk PE=1 SV=1	AGK	12.0312	12.3968	12.5001	12.2823	12.5406	12.178	12.3172	12.1922	12.5384	12.3524	12.4791	12.4638
F8VPN4	>tr|F8VPN4|F8VPN4_MOUSE Amylo-1,6-glucosidase, 4-alpha-glucanotransferase OS=Mus musculus (Mouse) OX=10090 GN=Agl PE=1 SV=1	AGL	11.1393	11.0962	10.7624	10.4456	10.973	10.9887	11.4159	11.4988	11.2778	10.8884	11.0385	11.0139
Q8CJG0	>sp|Q8CJG0|AGO2_MOUSE Protein argonaute-2 OS=Mus musculus (Mouse) OX=10090 GN=Ago2 PE=1 SV=3	AGO2	10.7556	11.0169	10.8529	11.0999	10.7181	10.4126	11.0114	11.2145	10.9109	11.1648	10.7112	10.9651
O35083	>sp|O35083|PLCA_MOUSE 1-acyl-sn-glycerol-3-phosphate acyltransferase alpha OS=Mus musculus (Mouse) OX=10090 GN=Agpat1 PE=1 SV=1	AGPAT1	11.7054	12.5317	12.4889	12.8026	12.6791	12.4418	12.2164	11.8463	12.3887	11.7148	12.308	12.4315
Q8K3K7	>sp|Q8K3K7|PLCB_MOUSE 1-acyl-sn-glycerol-3-phosphate acyltransferase beta OS=Mus musculus (Mouse) OX=10090 GN=Agpat2 PE=1 SV=1	AGPAT2	12.0766	12.0851	12.4063	12.1635	12.3469	11.5198	11.4476	10.8825	12.5885	12.2907	11.2704	11.3046
Q9D517	>sp|Q9D517|PLCC_MOUSE 1-acyl-sn-glycerol-3-phosphate acyltransferase gamma OS=Mus musculus (Mouse) OX=10090 GN=Agpat3 PE=1 SV=2	AGPAT3	11.4197	11.6642	11.9282	12.3717	12.1183	11.538	11.0426	10.9178	11.5698	11.7154	11.4484	11.4176
Q8K4X7	>sp|Q8K4X7|PLCD_MOUSE 1-acyl-sn-glycerol-3-phosphate acyltransferase delta OS=Mus musculus (Mouse) OX=10090 GN=Agpat4 PE=1 SV=1	AGPAT4	11.3508	11.552	11.2649	11.2692	11.735	11.1891	11.416	11.1899	11.4209	10.8956	11.3547	11.4394
Q9D1E8	>sp|Q9D1E8|PLCE_MOUSE 1-acyl-sn-glycerol-3-phosphate acyltransferase epsilon OS=Mus musculus (Mouse) OX=10090 GN=Agpat5 PE=1 SV=2	AGPAT5	11.2913	11.5605	11.3825	11.6613	11.4563	10.9028	11.8885	11.5855	12.1604	11.9791	11.4687	11.6953
Q8C0I1	>sp|Q8C0I1|ADAS_MOUSE Alkyldihydroxyacetonephosphate synthase, peroxisomal OS=Mus musculus (Mouse) OX=10090 GN=Agps PE=1 SV=1	AGPS	11.4196	11.4672	11.2794	11.1997	11.3246	11.3119	11.0087	10.8081	11.1441	11.2626	10.7292	11.0247
Q641K1	>sp|Q641K1|CBPC1_MOUSE Cytosolic carboxypeptidase 1 OS=Mus musculus (Mouse) OX=10090 GN=Agtpbp1 PE=1 SV=2	AGTPBP1							9.93073	9.60534	10.343	10.5652		10.673
P29754	>sp|P29754|AGTRA_MOUSE Type-1A angiotensin II receptor OS=Mus musculus (Mouse) OX=10090 GN=Agtr1a PE=1 SV=1	AGTR1A	11.9345	12.291	12.1778	11.9533	11.7305	11.7051	12.1083	12.3998	12.1183	11.2195	11.6842	12.223
Q8CJF7	>sp|Q8CJF7|ELYS_MOUSE Protein ELYS OS=Mus musculus (Mouse) OX=10090 GN=Ahctf1 PE=1 SV=1	AHCTF1							9.53379	9.4569	9.29584	9.48091	9.52675	9.10684
P50247	>sp|P50247|SAHH_MOUSE Adenosylhomocysteinase OS=Mus musculus (Mouse) OX=10090 GN=Ahcy PE=1 SV=3	AHCY	12.9788	12.9159	12.9393	13.1544	12.9016	13.3699	13.2372	13.34	12.938	13.2741	13	13.1666
Q80SW1	>sp|Q80SW1|SAHH2_MOUSE S-adenosylhomocysteine hydrolase-like protein 1 OS=Mus musculus (Mouse) OX=10090 GN=Ahcyl1 PE=1 SV=1	AHCYL1	10.4157	9.89633		9.45577	9.51665	10.8683	10.5499	10.1221	10.2141	10.1745	10.2675	9.93944
Q68FL4	>sp|Q68FL4|SAHH3_MOUSE Putative adenosylhomocysteinase 3 OS=Mus musculus (Mouse) OX=10090 GN=Ahcyl2 PE=1 SV=1	AHCYL2	9.74689	10.0856	10.3942	9.65503	9.89992	9.85311	10.4698	10.1562	10.3206		9.9108	10.2752
Q68FL4;Q80SW1	>sp|Q68FL4|SAHH3_MOUSE Putative adenosylhomocysteinase 3 OS=Mus musculus (Mouse) OX=10090 GN=Ahcyl2 PE=1 SV=1;>sp|Q80SW1|SAHH2_MOUSE S-adenosylhomocysteine hydrolase-like protein 1 OS=Mus musculus (Mouse) OX=10090 GN=Ahcyl1 PE=1 SV=1	AHCYL2;AHCYL1	11.9532	11.788	12.0023	11.6105	11.8074	12.4999	12.1416	11.9618	11.7233	11.3947	11.8755	12.0967
E9Q616	>tr|E9Q616|E9Q616_MOUSE PDZ domain-containing protein OS=Mus musculus (Mouse) OX=10090 GN=Ahnak PE=1 SV=1	AHNAK	11.7311	11.7166	11.5116	11.4953	11.6179	11.6413	11.0562	10.999	10.6938	11.1918	11.1998	11.1566
Q8BK64	>sp|Q8BK64|AHSA1_MOUSE Activator of 90 kDa heat shock protein ATPase homolog 1 OS=Mus musculus (Mouse) OX=10090 GN=Ahsa1 PE=1 SV=2	AHSA1	12.1951	12.2616	12.4997	12.5007	12.0881	12.3426	12.3131	12.2427	12.2067	12.2047	11.7464	12.1366
Q8N9S3	>sp|Q8N9S3|AHSA2_MOUSE Activator of 90 kDa heat shock protein ATPase homolog 2 OS=Mus musculus (Mouse) OX=10090 GN=Ahsa2 PE=1 SV=2	AHSA2	10.1954	9.91625	11.2283	10.3609	10.5062	11.2721	10.4141	10.1197	10.8558	10.5006	10.5532	10.2114
Q9Z0X1	>sp|Q9Z0X1|AIFM1_MOUSE Apoptosis-inducing factor 1, mitochondrial OS=Mus musculus (Mouse) OX=10090 GN=Aifm1 PE=1 SV=1	AIFM1	13.6013	13.7312	13.7026	13.8999	13.859	13.7077	13.8199	13.7299	13.8735	14.037	14.0735	14.0124
Q8BUE4	>sp|Q8BUE4|AIFM2_MOUSE Apoptosis-inducing factor 2 OS=Mus musculus (Mouse) OX=10090 GN=Aifm2 PE=1 SV=1	AIFM2	12.1787	12.1434	12.4801	12.3806	12.2276	12.3419	12.3944	12.293	12.3204	12.6554	12.4203	12.4712
P31230	>sp|P31230|AIMP1_MOUSE Aminoacyl tRNA synthase complex-interacting multifunctional protein 1 OS=Mus musculus (Mouse) OX=10090 GN=Aimp1 PE=1 SV=2	AIMP1	12.1252	12.1664	11.6442	10.9051	11.4349	11.8789	11.9196	12.0731	11.7692	11.479	11.5584	11.7732
Q8R010	>sp|Q8R010|AIMP2_MOUSE Aminoacyl tRNA synthase complex-interacting multifunctional protein 2 OS=Mus musculus (Mouse) OX=10090 GN=Aimp2 PE=1 SV=2	AIMP2	11.2463	11.388	10.8062	11.1001	11.0636	11.3438	11.2591	11.5457	10.8909	10.7459	11.0655	11.076
O08915	>sp|O08915|AIP_MOUSE AH receptor-interacting protein OS=Mus musculus (Mouse) OX=10090 GN=Aip PE=1 SV=1	AIP	11.8191	11.5085	11.4515	10.7077	11.4003	11.7357	11.5654	11.8075	11.2665	11.0368	10.7819	11.2573
Q9R0Y5	>sp|Q9R0Y5|KAD1_MOUSE Adenylate kinase isoenzyme 1 OS=Mus musculus (Mouse) OX=10090 GN=Ak1 PE=1 SV=1	AK1	12.4377	12.5284	12.7865	12.8316	12.4322	12.5268	12.8674	12.6888	13.1654	13.3347	12.9994	13.1269
Q9WTP6	>sp|Q9WTP6|KAD2_MOUSE Adenylate kinase 2, mitochondrial OS=Mus musculus (Mouse) OX=10090 GN=Ak2 PE=1 SV=5	AK2	13.3528	13.37	13.3312	13.4909	13.5487	13.018	13.4778	13.3658	13.8387	13.1634	13.5216	13.5638
Q9WTP7	>sp|Q9WTP7|KAD3_MOUSE GTP:AMP phosphotransferase AK3, mitochondrial OS=Mus musculus (Mouse) OX=10090 GN=Ak3 PE=1 SV=3	AK3	13.6344	13.747	14.3107	14.1298	14.1559	13.6642	13.8552	13.8335	13.8681	14.1197	14.0584	14.0564
Q9WUR9	>sp|Q9WUR9|KAD4_MOUSE Adenylate kinase 4, mitochondrial OS=Mus musculus (Mouse) OX=10090 GN=Ak4 PE=1 SV=1	AK4	11.7507	11.8569	11.8215	12.046	12.2314	12.2573	12.2677	12.2059	12.1324	11.671	12.2813	12.2866
O08715	>sp|O08715|AKAP1_MOUSE A-kinase anchor protein 1, mitochondrial OS=Mus musculus (Mouse) OX=10090 GN=Akap1 PE=1 SV=4	AKAP1	11.2038	10.9383	9.64253		10.4257	11.1162	10.8153	10.8519	10.677		10.7908	11.0642
Q9WTQ5	>sp|Q9WTQ5|AKA12_MOUSE A-kinase anchor protein 12 OS=Mus musculus (Mouse) OX=10090 GN=Akap12 PE=1 SV=1	AKAP12	10.9019	11.0344	10.5472	10.8277	10.5115	10.688	9.34743	10.4822	9.83162	11.1783	10.4188	10.1857
O54931	>sp|O54931|AKAP2_MOUSE A-kinase anchor protein 2 OS=Mus musculus (Mouse) OX=10090 GN=Akap2 PE=1 SV=3	AKAP2	11.3888	10.7694	11.0271	10.804	10.8449	11.2811	10.868	10.699	10.6547	11.0206	11.0211	10.569
Q9DBR0	>sp|Q9DBR0|AKAP8_MOUSE A-kinase anchor protein 8 OS=Mus musculus (Mouse) OX=10090 GN=Akap8 PE=1 SV=1	AKAP8	10.7115	10.8884		11.3243	10.5411	10.4377
Q9JII6	>sp|Q9JII6|AK1A1_MOUSE Aldo-keto reductase family 1 member A1 OS=Mus musculus (Mouse) OX=10090 GN=Akr1a1 PE=1 SV=3	AKR1A1	12.795	12.6878	12.8706	12.8359	12.8382	13.0557	12.862	13.0641	12.8924	13.0594	12.8992	13.0969
P45376	>sp|P45376|ALDR_MOUSE Aldo-keto reductase family 1 member B1 OS=Mus musculus (Mouse) OX=10090 GN=Akr1b1 PE=1 SV=3	AKR1B1	14.2568	14.1803	14.2525	14.4683	14.0787	14.4707	14.3575	14.4812	14.3113	14.4669	14.2793	14.2758
G5E895	>tr|G5E895|G5E895_MOUSE Aldo-keto reductase family 1, member B10 (aldose reductase) OS=Mus musculus (Mouse) OX=10090 GN=Akr1b10 PE=1 SV=1	AKR1B10	12.8521	12.934	13.3454	13.34	13.2029	13.0534	12.9104	13.0459	13.3749	13.1106	13.3193	13.1813
P21300	>sp|P21300|ALD1_MOUSE Aldo-keto reductase family 1 member B7 OS=Mus musculus (Mouse) OX=10090 GN=Akr1b7 PE=1 SV=4	AKR1B7	16.4453	16.1813	16.3107	16.3494	16.5211	16.5665	15.2056	15.4232	15.7661	15.8048	15.5828	15.5903
P21300;P45377	>sp|P21300|ALD1_MOUSE Aldo-keto reductase family 1 member B7 OS=Mus musculus (Mouse) OX=10090 GN=Akr1b7 PE=1 SV=4;>sp|P45377|ALD2_MOUSE Aldose reductase-related protein 2 OS=Mus musculus (Mouse) OX=10090 GN=Akr1b8 PE=1 SV=2	AKR1B7;AKR1B8	18.8748	18.5241	18.9853	18.8632	18.7513	18.8931	17.4959	17.8409	18.0564	18.1675	17.8918	17.9056
P45377	>sp|P45377|ALD2_MOUSE Aldose reductase-related protein 2 OS=Mus musculus (Mouse) OX=10090 GN=Akr1b8 PE=1 SV=2	AKR1B8	14.7506	14.6694	14.6272	14.5568	14.6843	14.7931	13.8259	13.999	14.3491	13.8069	14.1329	14.1421
Q3UXL1	>tr|Q3UXL1|Q3UXL1_MOUSE Aldo_ket_red domain-containing protein OS=Mus musculus (Mouse) OX=10090 GN=Akr1cl PE=1 SV=1	AKR1CL	13.7957	13.6977	13.2959	13.4679	13.515	13.6105	14.1246	14.4245	13.8763	13.6536	13.826	13.9732
Q8VCX1	>sp|Q8VCX1|AK1D1_MOUSE Aldo-keto reductase family 1 member D1 OS=Mus musculus (Mouse) OX=10090 GN=Akr1d1 PE=1 SV=1	AKR1D1	15.1708	14.7064	15.0907	16.0347	15.5684
Q9DCT1	>sp|Q9DCT1|AKCL2_MOUSE 1,5-anhydro-D-fructose reductase OS=Mus musculus (Mouse) OX=10090 GN=Akr1e2 PE=1 SV=1	AKR1E2	11.8073	11.8059	12.1902	10.8582	11.9395	11.5588	11.9853	12.189	11.8302	12.2237	11.8192	11.8775
Q8CG76	>sp|Q8CG76|ARK72_MOUSE Aflatoxin B1 aldehyde reductase member 2 OS=Mus musculus (Mouse) OX=10090 GN=Akr7a2 PE=1 SV=3	AKR7A2	11.8299	12.018	12.0447	12.2032	12.2039	11.771	12.397	12.1628	12.3805	12.25	12.3973	12.4246
P31750	>sp|P31750|AKT1_MOUSE RAC-alpha serine/threonine-protein kinase OS=Mus musculus (Mouse) OX=10090 GN=Akt1 PE=1 SV=2	AKT1	11.5126	11.3673	10.8873	10.5439	11.0588	11.3247	10.9311	11.3083	11.0072	10.2474	10.4905	9.60497
P31750;Q60823	>sp|P31750|AKT1_MOUSE RAC-alpha serine/threonine-protein kinase OS=Mus musculus (Mouse) OX=10090 GN=Akt1 PE=1 SV=2;>sp|Q60823|AKT2_MOUSE RAC-beta serine/threonine-protein kinase OS=Mus musculus (Mouse) OX=10090 GN=Akt2 PE=1 SV=1	AKT1;AKT2	10.7026	10.1188	10.9247	9.99456	10.9583	10.9469	10.6777	10.6229	10.3901	10.882	10.7027	9.79039
Q60823	>sp|Q60823|AKT2_MOUSE RAC-beta serine/threonine-protein kinase OS=Mus musculus (Mouse) OX=10090 GN=Akt2 PE=1 SV=1	AKT2	10.0019	10.126	11.2785	10.6871	10.9608	11.3062	9.49505	10.4148	9.25491	10.4022	10.613	10.1291
P10518	>sp|P10518|HEM2_MOUSE Delta-aminolevulinic acid dehydratase OS=Mus musculus (Mouse) OX=10090 GN=Alad PE=1 SV=1	ALAD	12.8802	12.634	13.1372	12.8463	12.3756	13.0309	13.3449	13.3636	12.8216	12.9522	12.7498	12.8687
Q8VC19	>sp|Q8VC19|HEM1_MOUSE 5-aminolevulinate synthase, nonspecific, mitochondrial OS=Mus musculus (Mouse) OX=10090 GN=Alas1 PE=1 SV=2	ALAS1	11.4797	11.5753	11.5658	10.8742	11.3337	11.2818	10.81	10.7233	11.2756	10.4814	10.7056	10.8828
P07724	>sp|P07724|ALBU_MOUSE Serum albumin OS=Mus musculus (Mouse) OX=10090 GN=Alb PE=1 SV=3	ALB	13.4744	13.7389	13.1435	13.1441	13.0108	12.7546	12.8805	13.0385	12.1242	12.8551	12.9889	12.7838
Q61490	>sp|Q61490|CD166_MOUSE CD166 antigen OS=Mus musculus (Mouse) OX=10090 GN=Alcam PE=1 SV=3	ALCAM	12.1031	12.2045	11.8216	11.1742	11.8044	11.2439	10.6946	11.3314	10.6846	11.2409	11.0165	10.4126
Q571I9	>sp|Q571I9|A16A1_MOUSE Aldehyde dehydrogenase family 16 member A1 OS=Mus musculus (Mouse) OX=10090 GN=Aldh16a1 PE=1 SV=2	ALDH16A1	10.2694	9.46108	10.1877	9.86271	10.1936	10.4298	10.0719	9.74271	9.12649	10.2191	10.5395	9.95878
Q9Z110	>sp|Q9Z110|P5CS_MOUSE Delta-1-pyrroline-5-carboxylate synthase OS=Mus musculus (Mouse) OX=10090 GN=Aldh18a1 PE=1 SV=2	ALDH18A1	11.8629	11.8483	11.8411	11.6857	11.7739	11.8254	10.5784	11.1429	10.8938	11.2331	10.9438	10.8065
P24549	>sp|P24549|AL1A1_MOUSE Retinal dehydrogenase 1 OS=Mus musculus (Mouse) OX=10090 GN=Aldh1a1 PE=1 SV=5	ALDH1A1	12.363	12.1179	11.3232	11.321	11.6943	11.1649	11.5355	12.4156	11.2656	11.264	12.505	11.8551
Q62148	>sp|Q62148|AL1A2_MOUSE Retinal dehydrogenase 2 OS=Mus musculus (Mouse) OX=10090 GN=Aldh1a2 PE=1 SV=2	ALDH1A2	10.6572	10.9163	11.2429	10.5936	10.9786	11.3327	10.9672	11.2868	11.1076	11.2434	11.5307	11.1048
Q62148;Q9CZS1	>sp|Q62148|AL1A2_MOUSE Retinal dehydrogenase 2 OS=Mus musculus (Mouse) OX=10090 GN=Aldh1a2 PE=1 SV=2;>sp|Q9CZS1|AL1B1_MOUSE Aldehyde dehydrogenase X, mitochondrial OS=Mus musculus (Mouse) OX=10090 GN=Aldh1b1 PE=1 SV=1	ALDH1A2;ALDH1B1	13.8827	12.8249	15.4961	15.1026	15.1024	14.5721	14.3831	14.461	15.0515	15.7992	15.4649	15.0165
O35945	>sp|O35945|AL1A7_MOUSE Aldehyde dehydrogenase, cytosolic 1 OS=Mus musculus (Mouse) OX=10090 GN=Aldh1a7 PE=1 SV=1	ALDH1A7							12.1502	9.69195	10.545		10.7465	10.7331
O35945;P24549	>sp|O35945|AL1A7_MOUSE Aldehyde dehydrogenase, cytosolic 1 OS=Mus musculus (Mouse) OX=10090 GN=Aldh1a7 PE=1 SV=1;>sp|P24549|AL1A1_MOUSE Retinal dehydrogenase 1 OS=Mus musculus (Mouse) OX=10090 GN=Aldh1a1 PE=1 SV=5	ALDH1A7;ALDH1A1	12.6203	12.2895	11.5213	11.555	12.0913	11.7618	11.6005	12.5612	11.3638	11.2904	12.5291	12.2002
O35945;P24549;P47738;Q62148;Q9CZS1	>sp|O35945|AL1A7_MOUSE Aldehyde dehydrogenase, cytosolic 1 OS=Mus musculus (Mouse) OX=10090 GN=Aldh1a7 PE=1 SV=1;>sp|P24549|AL1A1_MOUSE Retinal dehydrogenase 1 OS=Mus musculus (Mouse) OX=10090 GN=Aldh1a1 PE=1 SV=5;>sp|P47738|ALDH2_MOUSE Aldehyde dehydrogenase, mitochondrial OS=Mus musculus (Mouse) OX=10090 GN=Aldh2 PE=1 SV=1;>sp|Q62148|AL1A2_MOUSE Retinal dehydrogenase 2 OS=Mus musculus (Mouse) O…	ALDH1A7;ALDH1A1;ALDH2;ALDH1A2;ALDH1B1	15.7025	15.605	16.4168	16.5069	16.0898	16.1615	15.4565	15.9033	16.0207	16.7124	16.5153	16.1021
Q9CZS1	>sp|Q9CZS1|AL1B1_MOUSE Aldehyde dehydrogenase X, mitochondrial OS=Mus musculus (Mouse) OX=10090 GN=Aldh1b1 PE=1 SV=1	ALDH1B1	13.0048	13.2392	13.3863	13.3864	13.674	12.708	13.2277	13.1231	13.9155	13.6376	13.8166	13.7328
Q8R0Y6	>sp|Q8R0Y6|AL1L1_MOUSE Cytosolic 10-formyltetrahydrofolate dehydrogenase OS=Mus musculus (Mouse) OX=10090 GN=Aldh1l1 PE=1 SV=1	ALDH1L1	12.2848	12.2528	12.1107	12.1761	12.2195	12.5372	12.5407	12.6512	12.5601	12.2934	12.6675	12.4216
Q8K009	>sp|Q8K009|AL1L2_MOUSE Mitochondrial 10-formyltetrahydrofolate dehydrogenase OS=Mus musculus (Mouse) OX=10090 GN=Aldh1l2 PE=1 SV=2	ALDH1L2	10.9776	11.5703		11.3958	11.1199	11.1415
Q8K009;Q8R0Y6	>sp|Q8K009|AL1L2_MOUSE Mitochondrial 10-formyltetrahydrofolate dehydrogenase OS=Mus musculus (Mouse) OX=10090 GN=Aldh1l2 PE=1 SV=2;>sp|Q8R0Y6|AL1L1_MOUSE Cytosolic 10-formyltetrahydrofolate dehydrogenase OS=Mus musculus (Mouse) OX=10090 GN=Aldh1l1 PE=1 SV=1	ALDH1L2;ALDH1L1	13.4522	13.4207	12.982	12.9699	13.0952	13.4223	13.6247	13.3813	13.7941	12.8693	13.7075	12.5493
P47738	>sp|P47738|ALDH2_MOUSE Aldehyde dehydrogenase, mitochondrial OS=Mus musculus (Mouse) OX=10090 GN=Aldh2 PE=1 SV=1	ALDH2	15.5487	15.6294	15.7311	15.9266	15.7239	15.6711	15.6722	15.7564	15.9043	15.9911	15.8194	15.7648
P47738;Q62148	>sp|P47738|ALDH2_MOUSE Aldehyde dehydrogenase, mitochondrial OS=Mus musculus (Mouse) OX=10090 GN=Aldh2 PE=1 SV=1;>sp|Q62148|AL1A2_MOUSE Retinal dehydrogenase 2 OS=Mus musculus (Mouse) OX=10090 GN=Aldh1a2 PE=1 SV=2	ALDH2;ALDH1A2	16.0903	16.2425	16.6482	17.2859	16.8468	16.9862	16.4751	15.9533	16.5352	16.746	16.8703	16.7696
P47740	>sp|P47740|AL3A2_MOUSE Aldehyde dehydrogenase family 3 member A2 OS=Mus musculus (Mouse) OX=10090 GN=Aldh3a2 PE=1 SV=2	ALDH3A2	11.9118	12.2602	12.2985	12.2691	12.2966	12.0712	12.0278	11.9536	12.0613	12.1204	12.097	12.111
Q80VQ0	>sp|Q80VQ0|AL3B1_MOUSE Aldehyde dehydrogenase family 3 member B1 OS=Mus musculus (Mouse) OX=10090 GN=Aldh3b1 PE=1 SV=1	ALDH3B1	11.4145	11.5164	11.6893	11.5792	11.6747	11.3446	11.2053	10.8684	11.195	11.3701	11.4365	11.0552
Q8CHT0	>sp|Q8CHT0|AL4A1_MOUSE Delta-1-pyrroline-5-carboxylate dehydrogenase, mitochondrial OS=Mus musculus (Mouse) OX=10090 GN=Aldh4a1 PE=1 SV=3	ALDH4A1	12.7416	12.8851	13.1478	13.2067	13.1188	12.8204	13.2601	13.0114	13.493	13.3161	13.5927	13.5227
Q8BWF0	>sp|Q8BWF0|SSDH_MOUSE Succinate-semialdehyde dehydrogenase, mitochondrial OS=Mus musculus (Mouse) OX=10090 GN=Aldh5a1 PE=1 SV=1	ALDH5A1	11.8879	11.9886	12.0335	12.143	12.2212	12.0424	12.2603	11.9021	12.3311	12.1462	12.1611	12.3705
Q9EQ20	>sp|Q9EQ20|MMSA_MOUSE Methylmalonate-semialdehyde dehydrogenase [acylating], mitochondrial OS=Mus musculus (Mouse) OX=10090 GN=Aldh6a1 PE=1 SV=1	ALDH6A1	13.5616	13.8881	13.5719	14.0805	14.0365	13.6478	13.9866	13.7724	14.1952	13.984	14.2864	14.2271
Q9DBF1	>sp|Q9DBF1|AL7A1_MOUSE Alpha-aminoadipic semialdehyde dehydrogenase OS=Mus musculus (Mouse) OX=10090 GN=Aldh7a1 PE=1 SV=4	ALDH7A1	12.262	12.492	12.4587	12.5621	12.523	12.468	12.3885	12.2831	12.6102	12.8335	12.5997	12.5454
Q9JLJ2	>sp|Q9JLJ2|AL9A1_MOUSE 4-trimethylaminobutyraldehyde dehydrogenase OS=Mus musculus (Mouse) OX=10090 GN=Aldh9a1 PE=1 SV=1	ALDH9A1	12.9165	13.1418	13.0944	13.2403	13.1734	13.1204	13.2262	13.0898	13.3818	13.3095	13.2939	13.3852
P05064	>sp|P05064|ALDOA_MOUSE Fructose-bisphosphate aldolase A OS=Mus musculus (Mouse) OX=10090 GN=Aldoa PE=1 SV=2	ALDOA	14.1935	14.0053	14.0353	13.9709	13.8686	14.3175	14.1219	14.4231	13.9163	14.0723	13.7337	14.0125
A6ZI47	>tr|A6ZI47|A6ZI47_MOUSE Fructose-bisphosphate aldolase OS=Mus musculus (Mouse) OX=10090 GN=Aldoart2 PE=1 SV=1	ALDOART2	14.713	14	14.9262	14.6682	14.2527	14.7129	14.2469	14.4475	14.1986	14.4054	14.0111	13.8692
P05063	>sp|P05063|ALDOC_MOUSE Fructose-bisphosphate aldolase C OS=Mus musculus (Mouse) OX=10090 GN=Aldoc PE=1 SV=4	ALDOC	9.06715	9.05216	9.82931		9.56398	9.87558	9.50489	8.82786	9.42419	10.108	9.83328	9.32897
P05063;P05064	>sp|P05063|ALDOC_MOUSE Fructose-bisphosphate aldolase C OS=Mus musculus (Mouse) OX=10090 GN=Aldoc PE=1 SV=4;>sp|P05064|ALDOA_MOUSE Fructose-bisphosphate aldolase A OS=Mus musculus (Mouse) OX=10090 GN=Aldoa PE=1 SV=2	ALDOC;ALDOA	15.1235	14.4472	13.4353	13.7723	14.4149	12.8158	14.6595	15.5835	14.3923	11.3151	14.1672	14.6359
Q3UGP8	>sp|Q3UGP8|AG10B_MOUSE Putative Dol-P-Glc:Glc(2)Man(9)GlcNAc(2)-PP-Dol alpha-1,2-glucosyltransferase OS=Mus musculus (Mouse) OX=10090 GN=Alg10b PE=1 SV=1	ALG10B	12.0582	12.1985		13.1452	12.304	12.3545
Q3TZM9	>sp|Q3TZM9|ALG11_MOUSE GDP-Man:Man(3)GlcNAc(2)-PP-Dol alpha-1,2-mannosyltransferase OS=Mus musculus (Mouse) OX=10090 GN=Alg11 PE=2 SV=1	ALG11	11.0247	11.0434	10.9816		11.4175	10.7775	10.4374	10.5087	11.2082	11.2595	10.0543	10.8621
Q9D8C3	>sp|Q9D8C3|ALG13_MOUSE Putative bifunctional UDP-N-acetylglucosamine transferase and deubiquitinase ALG13 OS=Mus musculus (Mouse) OX=10090 GN=Alg13 PE=1 SV=2	ALG13							9.61772	9.75208	9.98282		10.4575	9.56366
Q9DBE8	>sp|Q9DBE8|ALG2_MOUSE Alpha-1,3/1,6-mannosyltransferase ALG2 OS=Mus musculus (Mouse) OX=10090 GN=Alg2 PE=1 SV=2	ALG2	12.5416	12.7007	12.5035	12.7086	12.7425	12.7888	12.56	12.3767	12.5306	12.3934	12.6133	12.6362
Q8K2A8	>sp|Q8K2A8|ALG3_MOUSE Dol-P-Man:Man(5)GlcNAc(2)-PP-Dol alpha-1,3-mannosyltransferase OS=Mus musculus (Mouse) OX=10090 GN=Alg3 PE=1 SV=2	ALG3	9.97891	10.5788		10.7819	10.9004	10.514
Q9DB25	>sp|Q9DB25|ALG5_MOUSE Dolichyl-phosphate beta-glucosyltransferase OS=Mus musculus (Mouse) OX=10090 GN=Alg5 PE=1 SV=1	ALG5	11.7451	12.0667	11.9044	11.7277	12.358	12.0579	11.9169	11.7963	12.2101	11.6774	11.6918	12.0793
Q6P8H8	>sp|Q6P8H8|ALG8_MOUSE Probable dolichyl pyrophosphate Glc1Man9GlcNAc2 alpha-1,3-glucosyltransferase OS=Mus musculus (Mouse) OX=10090 GN=Alg8 PE=2 SV=2	ALG8	11.7596	12.0866	12.1721	12.2236	12.3194	11.9388	12.1999	12.1614	12.0136	12.4184	12.3267	12.3523
Q3TSG4	>sp|Q3TSG4|ALKB5_MOUSE RNA demethylase ALKBH5 OS=Mus musculus (Mouse) OX=10090 GN=Alkbh5 PE=1 SV=2	ALKBH5	10.037	10.0819	10.6393		9.52002	10.419	9.84332	9.93311	9.85314	10.2442	10.2887	9.81371
O08583	>sp|O08583|THOC4_MOUSE THO complex subunit 4 OS=Mus musculus (Mouse) OX=10090 GN=Alyref PE=1 SV=3	ALYREF	11.9495	11.7612	11.0443	11.6031	11.8159	11.3652	11.6224	11.7047	11.7001	11.6058	11.5939	11.6
O09174	>sp|O09174|AMACR_MOUSE Alpha-methylacyl-CoA racemase OS=Mus musculus (Mouse) OX=10090 GN=Amacr PE=1 SV=4	AMACR	11.715	11.9017	11.3099	11.6065	11.8814	11.3108	11.6252	11.6213	11.9085	11.5958	11.8327	11.7349
Q8JZV7	>sp|Q8JZV7|NAGA_MOUSE N-acetylglucosamine-6-phosphate deacetylase OS=Mus musculus (Mouse) OX=10090 GN=Amdhd2 PE=1 SV=1	AMDHD2	9.86756		11.0016	10.3634	10.8229	11.3127	9.88124	10.3994	10.1907	11.3411	10.4756	9.23414
Q7TS75	>sp|Q7TS75|AMER1_MOUSE APC membrane recruitment protein 1 OS=Mus musculus (Mouse) OX=10090 GN=Amer1 PE=2 SV=3	AMER1							10.1494	10.0014	10.4082		10.5403	11.1763
Q9R049	>sp|Q9R049|AMFR_MOUSE E3 ubiquitin-protein ligase AMFR OS=Mus musculus (Mouse) OX=10090 GN=Amfr PE=1 SV=2	AMFR	11.8092	11.9435	11.7198	11.6169	11.6935	11.9645	11.4261	11.6908	11.9458	11.2241	11.5703	11.8096
Q8VHG2	>sp|Q8VHG2|AMOT_MOUSE Angiomotin OS=Mus musculus (Mouse) OX=10090 GN=Amot PE=1 SV=3	AMOT	12.3117	11.9545	11.7104	10.5958	11.3	12.3616	12.0206	12.1412	12.3978	12.5267	10.867
Q9DBT5	>sp|Q9DBT5|AMPD2_MOUSE AMP deaminase 2 OS=Mus musculus (Mouse) OX=10090 GN=Ampd2 PE=1 SV=1	AMPD2	12.0394	11.843	12.1908	12.1749	11.9699	11.9426	11.7298	11.7178	11.723	12.1718	11.5972	11.7633
P53995	>sp|P53995|APC1_MOUSE Anaphase-promoting complex subunit 1 OS=Mus musculus (Mouse) OX=10090 GN=Anapc1 PE=1 SV=2	ANAPC1	10.804	11.0151	11.0616	11.0211	11.1628	10.3003	10.7729	10.854	11.0053	10.9386	10.8436	10.6114
Q8BZQ7	>sp|Q8BZQ7|ANC2_MOUSE Anaphase-promoting complex subunit 2 OS=Mus musculus (Mouse) OX=10090 GN=Anapc2 PE=1 SV=2	ANAPC2	10.9345	10.5775	10.9046	11.3268	10.7711	10.531	10.2463	9.97653	10.6507	11.312	10.7937	10.6267
Q91W96	>sp|Q91W96|APC4_MOUSE Anaphase-promoting complex subunit 4 OS=Mus musculus (Mouse) OX=10090 GN=Anapc4 PE=1 SV=1	ANAPC4	10.1528	11.2783	10.5877		11.1134	10.0631	10.6777	11.231	10.8349	10.601	10.8594	10.5759
Q8BTZ4	>sp|Q8BTZ4|APC5_MOUSE Anaphase-promoting complex subunit 5 OS=Mus musculus (Mouse) OX=10090 GN=Anapc5 PE=1 SV=1	ANAPC5	10.6512	10.7645		10.4128	10.2342	10.0375	10.344	10.7171	10.3048		10.4118	10.2424
Q9WVM3	>sp|Q9WVM3|APC7_MOUSE Anaphase-promoting complex subunit 7 OS=Mus musculus (Mouse) OX=10090 GN=Anapc7 PE=1 SV=3	ANAPC7							11.0078	11.2664	11.0727	10.3319	12.1455	11.1454
Q8K1C0	>sp|Q8K1C0|ANGE2_MOUSE Protein angel homolog 2 OS=Mus musculus (Mouse) OX=10090 GN=Angel2 PE=1 SV=1	ANGEL2	9.61139	10.5242	10.8866	10.139	10.6814	10.3101	9.79761	10.2781	10.3269	9.96772	10.4529	10.3484
Q02357	>sp|Q02357|ANK1_MOUSE Ankyrin-1 OS=Mus musculus (Mouse) OX=10090 GN=Ank1 PE=1 SV=2	ANK1	12.65	13.5817	10.804	9.88252	11.4674		10.4306	10.7153	10.1253	10.8017		11.3646
Q8C8R3	>sp|Q8C8R3|ANK2_MOUSE Ankyrin-2 OS=Mus musculus (Mouse) OX=10090 GN=Ank2 PE=1 SV=2	ANK2	9.16581	8.83739	9.86101		9.87053	9.83792	9.46406	9.18094	9.27826	9.49752		9.24601
Q8C8R3;Q8JZQ2	>sp|Q8C8R3|ANK2_MOUSE Ankyrin-2 OS=Mus musculus (Mouse) OX=10090 GN=Ank2 PE=1 SV=2;>sp|Q8JZQ2|AFG32_MOUSE AFG3-like protein 2 OS=Mus musculus (Mouse) OX=10090 GN=Afg3l2 PE=1 SV=1	ANK2;AFG3L2	13.4723	14.0277	13.6708	13.8095	13.8723	13.7025	13.5437	13.711	14.0725	13.8989	13.5504	13.7418
Q810B6	>sp|Q810B6|ANFY1_MOUSE Rabankyrin-5 OS=Mus musculus (Mouse) OX=10090 GN=Ankfy1 PE=1 SV=2	ANKFY1	11.2354	11.3151	11.28	11.4001	11.3284	11.4373	11.4034	11.5124	11.0542	10.9518	10.8934	11.0537
Q6ZPS6	>sp|Q6ZPS6|AKIB1_MOUSE Ankyrin repeat and IBR domain-containing protein 1 OS=Mus musculus (Mouse) OX=10090 GN=Ankib1 PE=1 SV=2	ANKIB1	9.941	10.1261	9.94105		10.3581	10.1995	10.0465	9.78098	10.0038	10.0499	10.245	9.99882
Q3TPE9	>sp|Q3TPE9|ANKY2_MOUSE Ankyrin repeat and MYND domain-containing protein 2 OS=Mus musculus (Mouse) OX=10090 GN=Ankmy2 PE=1 SV=1	ANKMY2							9.67877	9.36812	9.43192		10.0111	9.76316
Q80UP5	>sp|Q80UP5|AN13A_MOUSE Ankyrin repeat domain-containing protein 13A OS=Mus musculus (Mouse) OX=10090 GN=Ankrd13a PE=1 SV=2	ANKRD13A	11.0789	10.2194	10.4366	11.3532		11.129	10.9908	11.2469	10.6946	11.4383	10.3271	10.6972
Q99NH0	>sp|Q99NH0|ANR17_MOUSE Ankyrin repeat domain-containing protein 17 OS=Mus musculus (Mouse) OX=10090 GN=Ankrd17 PE=1 SV=2	ANKRD17	10.9364	10.9479		10.3416	10.9076	11.0734	10.622	10.4027	10.4759		10.4626	10.6467
Q8BH79	>sp|Q8BH79|ANO10_MOUSE Anoctamin-10 OS=Mus musculus (Mouse) OX=10090 GN=Ano10 PE=1 SV=1	ANO10	11.266	11.3766	11.1288	11.0117	11.0306	10.7813	10.7881	11.0852	11.3708	11.2237	10.7658	10.9231
Q6P9J9	>sp|Q6P9J9|ANO6_MOUSE Anoctamin-6 OS=Mus musculus (Mouse) OX=10090 GN=Ano6 PE=1 SV=1	ANO6	11.6143	11.4028	11.4925	11.1018	11.1632	11.4604	10.7726	10.969	10.7747	11.5472	11.1416	10.7357
O35381	>sp|O35381|AN32A_MOUSE Acidic leucine-rich nuclear phosphoprotein 32 family member A OS=Mus musculus (Mouse) OX=10090 GN=Anp32a PE=1 SV=1	ANP32A	12.6432	12.7281	12.8382	12.585	12.501	12.5855	12.6349	12.9274	12.7356	12.4847	12.5717	12.6474
O35381;Q9EST5	>sp|O35381|AN32A_MOUSE Acidic leucine-rich nuclear phosphoprotein 32 family member A OS=Mus musculus (Mouse) OX=10090 GN=Anp32a PE=1 SV=1;>sp|Q9EST5|AN32B_MOUSE Acidic leucine-rich nuclear phosphoprotein 32 family member B OS=Mus musculus (Mouse) OX=10090 GN=Anp32b PE=1 SV=1	ANP32A;ANP32B	13.4426	13.194	13.7026	13.5864	13.4242	14.0863	13.8275	13.6967	13.2408	13.4314	13.8812	13.5621
Q9EST5	>sp|Q9EST5|AN32B_MOUSE Acidic leucine-rich nuclear phosphoprotein 32 family member B OS=Mus musculus (Mouse) OX=10090 GN=Anp32b PE=1 SV=1	ANP32B	12.6959	12.8149	12.7301	12.52	13.0549	13.1863	12.8648	12.6357	12.3473	12.4002	12.1461	12.723
P97822	>sp|P97822|AN32E_MOUSE Acidic leucine-rich nuclear phosphoprotein 32 family member E OS=Mus musculus (Mouse) OX=10090 GN=Anp32e PE=1 SV=2	ANP32E	11.8463	11.4923	11.7144	11.417	11.6688	11.9453	11.5697	11.7033	11.5469	10.7268	11.6307	11.5348
P97449	>sp|P97449|AMPN_MOUSE Aminopeptidase N OS=Mus musculus (Mouse) OX=10090 GN=Anpep PE=1 SV=4	ANPEP	11.7973	11.7702	11.3921	11.2266	11.4477	11.0617	10.678	10.6836	10.3536	11.0523	10.592	10.5143
Q501J2	>sp|Q501J2|ANKMT_MOUSE Adenine nucleotide translocase lysine N-methyltransferase OS=Mus musculus (Mouse) OX=10090 GN=Antkmt PE=1 SV=1	ANTKMT	12.0428	11.8842	12.1916	11.5836	11.9106	11.5789	11.632	11.5274	11.5829	11.6284	11.7595	11.1893
Q6DFX2	>sp|Q6DFX2|ANTR2_MOUSE Anthrax toxin receptor 2 OS=Mus musculus (Mouse) OX=10090 GN=Antxr2 PE=1 SV=1	ANTXR2	10.4399	10.9089	11.2301	9.92672	10.7176	10.6254	10.5813	10.0367	10.5695	10.9496	10.6012	10.587
P10107	>sp|P10107|ANXA1_MOUSE Annexin A1 OS=Mus musculus (Mouse) OX=10090 GN=Anxa1 PE=1 SV=2	ANXA1	11.0295	11.3605	10.8244	11.8394	11.0765	10.7399
P97384	>sp|P97384|ANX11_MOUSE Annexin A11 OS=Mus musculus (Mouse) OX=10090 GN=Anxa11 PE=1 SV=2	ANXA11	11.6632	11.6368	11.1547	11.4877	11.1641	11.3518	11.3587	11.7149	11.0757	11.1804	11.1896	11.4177
Q99JG3	>sp|Q99JG3|ANX13_MOUSE Annexin A13 OS=Mus musculus (Mouse) OX=10090 GN=Anxa13 PE=1 SV=3	ANXA13	13.5042	13.7221	13.0698	13.1235	12.9826	11.862	12.6666	13.6012	11.9526	11.7397	12.1214
P07356	>sp|P07356|ANXA2_MOUSE Annexin A2 OS=Mus musculus (Mouse) OX=10090 GN=Anxa2 PE=1 SV=2	ANXA2	13.803	13.8459	13.5582	13.6691	13.5447	13.7161	13.2672	13.2237	13.2076	13.1981	13.1584	13.2819
O35639	>sp|O35639|ANXA3_MOUSE Annexin A3 OS=Mus musculus (Mouse) OX=10090 GN=Anxa3 PE=1 SV=4	ANXA3	12.2464	12.7879	11.6438	11.2059	12.4789	12.2591	11.0149	10.3707	10.6245	10.6428	11.3525	10.6441
P97429	>sp|P97429|ANXA4_MOUSE Annexin A4 OS=Mus musculus (Mouse) OX=10090 GN=Anxa4 PE=1 SV=4	ANXA4	12.5512	12.4325	12.453	12.6468	12.4126	12.9185	12.7057	12.9218	12.2286	12.4356	12.3825	12.5209
P48036	>sp|P48036|ANXA5_MOUSE Annexin A5 OS=Mus musculus (Mouse) OX=10090 GN=Anxa5 PE=1 SV=1	ANXA5	13.9992	13.7038	13.9333	14.0116	13.7619	14.1197	13.991	14.3813	14.0217	14.1892	14.0121	14.1012
P14824	>sp|P14824|ANXA6_MOUSE Annexin A6 OS=Mus musculus (Mouse) OX=10090 GN=Anxa6 PE=1 SV=3	ANXA6	12.6974	12.574	12.4781	12.4821	12.2808	12.7717	12.2204	12.5317	12.0732	12.0357	11.9616	12.0337
P14824;P97429	>sp|P14824|ANXA6_MOUSE Annexin A6 OS=Mus musculus (Mouse) OX=10090 GN=Anxa6 PE=1 SV=3;>sp|P97429|ANXA4_MOUSE Annexin A4 OS=Mus musculus (Mouse) OX=10090 GN=Anxa4 PE=1 SV=4	ANXA6;ANXA4	13.3851	10.6149	13.9777	13.5133	13.759	14.3109	12.3862	13.1738	12.5851	13.23	13.6193	13.2265
Q07076	>sp|Q07076|ANXA7_MOUSE Annexin A7 OS=Mus musculus (Mouse) OX=10090 GN=Anxa7 PE=1 SV=2	ANXA7	12.2645	12.0509	12.1688	12.1309	11.9765	12.6964	11.8661	12.1097	11.7134	11.9167	11.7775	11.7766
O70423	>sp|O70423|AOC3_MOUSE Membrane primary amine oxidase OS=Mus musculus (Mouse) OX=10090 GN=Aoc3 PE=1 SV=3	AOC3	11.7372	11.5782	11.7561	11.5483	11.1918	11.3522	10.8137	9.51081	10.5838	10.9869		10.271
O54754	>sp|O54754|AOXA_MOUSE Aldehyde oxidase 1 OS=Mus musculus (Mouse) OX=10090 GN=Aox1 PE=1 SV=2	AOX1							10.4793	10.6107	10.3097		10.5944	10.4685
O35643	>sp|O35643|AP1B1_MOUSE AP-1 complex subunit beta-1 OS=Mus musculus (Mouse) OX=10090 GN=Ap1b1 PE=1 SV=2	AP1B1	11.71	11.3934	11.6288	11.4295	11.5264	11.6659	11.3675	11.6981	11.4041	10.9015	11.6554	11.3522
O35643;Q9DBG3	>sp|O35643|AP1B1_MOUSE AP-1 complex subunit beta-1 OS=Mus musculus (Mouse) OX=10090 GN=Ap1b1 PE=1 SV=2;>sp|Q9DBG3|AP2B1_MOUSE AP-2 complex subunit beta OS=Mus musculus (Mouse) OX=10090 GN=Ap2b1 PE=1 SV=1	AP1B1;AP2B1	12.3936	12.2285	12.4498	12.5421	12.3328	12.447	11.9339	12.1693	11.9271	12.0755	12.0757	11.9693
P22892	>sp|P22892|AP1G1_MOUSE AP-1 complex subunit gamma-1 OS=Mus musculus (Mouse) OX=10090 GN=Ap1g1 PE=1 SV=3	AP1G1	12.0845	11.9876	12.2822	12.1166	12.2018	12.4628	12.1449	12.4068	12.0859	12.1909	11.6582	11.9209
O88512	>sp|O88512|AP1G2_MOUSE AP-1 complex subunit gamma-like 2 OS=Mus musculus (Mouse) OX=10090 GN=Ap1g2 PE=1 SV=2	AP1G2	12.1547	12.0986	12.4678	12.2795	11.6889	12.4619	11.7261	11.986	11.605	13.2189	12.0962	11.2667
P35585	>sp|P35585|AP1M1_MOUSE AP-1 complex subunit mu-1 OS=Mus musculus (Mouse) OX=10090 GN=Ap1m1 PE=1 SV=3	AP1M1	11.6355	11.7594	11.3377	11.6354	11.7344	11.7177	11.6862	11.9041	11.527	11.3711	11.2481	11.6498
P61967	>sp|P61967|AP1S1_MOUSE AP-1 complex subunit sigma-1A OS=Mus musculus (Mouse) OX=10090 GN=Ap1s1 PE=1 SV=1	AP1S1	11.4995	11.3733	10.8471	10.7095	10.4868	9.82908	11.1765	11.2267	11.5321	11.3154	10.99	11.0077
P17426	>sp|P17426|AP2A1_MOUSE AP-2 complex subunit alpha-1 OS=Mus musculus (Mouse) OX=10090 GN=Ap2a1 PE=1 SV=1	AP2A1	12.3245	12.317	12.138	12.4422	12.1548	12.5693	12.2547	12.2475	11.8651	12.0859	11.7053	11.8899
P17426;P17427	>sp|P17426|AP2A1_MOUSE AP-2 complex subunit alpha-1 OS=Mus musculus (Mouse) OX=10090 GN=Ap2a1 PE=1 SV=1;>sp|P17427|AP2A2_MOUSE AP-2 complex subunit alpha-2 OS=Mus musculus (Mouse) OX=10090 GN=Ap2a2 PE=1 SV=2	AP2A1;AP2A2	13.5657	13.5298	13.3685	13.3735	13.3148	13.3403	13.1113	13.4608	13.0922	13.0422	12.7748	12.8847
P17427	>sp|P17427|AP2A2_MOUSE AP-2 complex subunit alpha-2 OS=Mus musculus (Mouse) OX=10090 GN=Ap2a2 PE=1 SV=2	AP2A2	11.6292	11.8559	11.9514	11.962	11.7496	12.0074	11.8235	11.9053	11.6092	11.9293	11.6714	11.6092
Q9DBG3	>sp|Q9DBG3|AP2B1_MOUSE AP-2 complex subunit beta OS=Mus musculus (Mouse) OX=10090 GN=Ap2b1 PE=1 SV=1	AP2B1	12.4012	12.2277	12.3045	12.2958	12.2374	12.563	12.2034	12.2291	11.8992	11.9353	11.9049	12.0302
P84091	>sp|P84091|AP2M1_MOUSE AP-2 complex subunit mu OS=Mus musculus (Mouse) OX=10090 GN=Ap2m1 PE=1 SV=1	AP2M1	12.5586	12.5083	12.4865	12.7162	12.424	12.7826	12.45	12.471	12.0778	12.4126	11.997	12.1941
P62743	>sp|P62743|AP2S1_MOUSE AP-2 complex subunit sigma OS=Mus musculus (Mouse) OX=10090 GN=Ap2s1 PE=1 SV=1	AP2S1	12.5605	12.1509	12.2357	11.7777	11.7551	12.1435	12.0051	12.1313	11.8306	12.2852	11.7994	11.8828
Q9Z1T1	>sp|Q9Z1T1|AP3B1_MOUSE AP-3 complex subunit beta-1 OS=Mus musculus (Mouse) OX=10090 GN=Ap3b1 PE=1 SV=2	AP3B1	11.3935	11.2163	11.0577	11.4382	11.4464	11.5807	11.348	11.3871	11.2723	11.4878	11.5686	11.3096
O54774	>sp|O54774|AP3D1_MOUSE AP-3 complex subunit delta-1 OS=Mus musculus (Mouse) OX=10090 GN=Ap3d1 PE=1 SV=1	AP3D1	11.4374	11.3633	11.5019	11.7078	11.6899	11.8897	11.6598	11.496	11.2696	11.8001	11.5266	11.7293
Q9JKC8	>sp|Q9JKC8|AP3M1_MOUSE AP-3 complex subunit mu-1 OS=Mus musculus (Mouse) OX=10090 GN=Ap3m1 PE=1 SV=1	AP3M1	11.5857	11.6485	11.1724	11.1967	11.3442	11.2701	11.4386	11.5919	11.364	11.0848	11.0606	11.0993
Q9DCR2	>sp|Q9DCR2|AP3S1_MOUSE AP-3 complex subunit sigma-1 OS=Mus musculus (Mouse) OX=10090 GN=Ap3s1 PE=1 SV=2	AP3S1	9.94102	10.9442	10.3594		10.1659	10.6888	10.6318	9.70298	10.0443		9.65763	10.5838
Q8BSZ2	>sp|Q8BSZ2|AP3S2_MOUSE AP-3 complex subunit sigma-2 OS=Mus musculus (Mouse) OX=10090 GN=Ap3s2 PE=1 SV=1	AP3S2	11.2484	10.6983	11.1489	10.2829	10.9731	11.0478	11.0506	11.2765	11.4117	10.8088	11.2294	11.1222
Q8R146	>sp|Q8R146|APEH_MOUSE Acylamino-acid-releasing enzyme OS=Mus musculus (Mouse) OX=10090 GN=Apeh PE=1 SV=3	APEH	11.7796	12.1125	11.4596	11.3208	11.5122	11.3847	11.343	11.6862	11.6206	10.832	11.0463	11.3725
P28352	>sp|P28352|APEX1_MOUSE DNA-(apurinic or apyrimidinic site) lyase OS=Mus musculus (Mouse) OX=10090 GN=Apex1 PE=1 SV=2	APEX1	12.8549	12.2718	12.805	12.9983	12.4928	12.8945	12.8943	12.9823	12.728	12.9177	12.515	12.739
Q8BVF7	>sp|Q8BVF7|APH1A_MOUSE Gamma-secretase subunit APH-1A OS=Mus musculus (Mouse) OX=10090 GN=Aph1a PE=1 SV=2	APH1A	11.5918	11.5869	11.8961	11.4862	10.3782	11.7969	10.9783	10.9706	11.0165	11.8217	11.3773	11.3096
O35841	>sp|O35841|API5_MOUSE Apoptosis inhibitor 5 OS=Mus musculus (Mouse) OX=10090 GN=Api5 PE=1 SV=2	API5	11.9749	11.9818	11.9683	11.9448	11.8093	12.1275	11.945	12.018	11.9015	11.7154	11.7682	11.6947
Q9WVQ5	>sp|Q9WVQ5|MTNB_MOUSE Methylthioribulose-1-phosphate dehydratase OS=Mus musculus (Mouse) OX=10090 GN=Apip PE=1 SV=1	APIP	11.4492	11.452	11.9756	11.1028	11.1571	11.0223	11.2435	11.9864	11.3731	11.4394	11.5669	11.5206
Q9D7N9	>sp|Q9D7N9|APMAP_MOUSE Adipocyte plasma membrane-associated protein OS=Mus musculus (Mouse) OX=10090 GN=Apmap PE=1 SV=1	APMAP	12.3759	12.6752	12.7044	12.612	12.6746	12.4405	12.2025	12.0857	12.3831	12.423	12.4943	12.3177
Q00623	>sp|Q00623|APOA1_MOUSE Apolipoprotein A-I OS=Mus musculus (Mouse) OX=10090 GN=Apoa1 PE=1 SV=2	APOA1	12.928	12.757	12.8067	12.7192	13.193	12.5385	11.5291	11.5941	11.9542	12.3288	12.0317	12.2133
E9Q414	>sp|E9Q414|APOB_MOUSE Apolipoprotein B-100 OS=Mus musculus (Mouse) OX=10090 GN=Apob PE=1 SV=1	APOB	10.6142	11.9748	11.7898		11.753	10.6037	11.3163	10.7484	11.3167	11.0406	9.94364	11.4573
P08226	>sp|P08226|APOE_MOUSE Apolipoprotein E OS=Mus musculus (Mouse) OX=10090 GN=Apoe PE=1 SV=2	APOE	10.5237	10.5895	11.425	10.9435	10.8645	10.6351	10.762	10.725	10.9342	11.3541	11.7178	11.3862
Q9DCZ4	>sp|Q9DCZ4|MIC26_MOUSE MICOS complex subunit Mic26 OS=Mus musculus (Mouse) OX=10090 GN=Apoo PE=1 SV=2	APOO	13.6579	14.1224	13.8139	13.6515	14.0391	13.3803	13.8729	13.5084	14.3254	13.9005	14.2839	14.1823
Q78IK4	>sp|Q78IK4|MIC27_MOUSE MICOS complex subunit Mic27 OS=Mus musculus (Mouse) OX=10090 GN=Apool PE=1 SV=1	APOOL	12.6899	12.7822	12.9546	12.8003	12.9238	12.5221	12.7726	12.6408	13.1862	13.1123	13.0471	13.0522
Q8K3H0	>sp|Q8K3H0|DP13A_MOUSE DCC-interacting protein 13-alpha OS=Mus musculus (Mouse) OX=10090 GN=Appl1 PE=1 SV=1	APPL1	11.0602	10.8088	10.9235	11.315	10.8496	11.0246	11.4896	11.4483	11.1572	11.1578	11.15	11.2837
Q8K3G9	>sp|Q8K3G9|DP13B_MOUSE DCC-interacting protein 13-beta OS=Mus musculus (Mouse) OX=10090 GN=Appl2 PE=1 SV=1	APPL2	10.3779	10.2229	11.167	10.2818	10.6825	10.3485	10.842	10.163	10.961		10.3403	10.8947
P08030	>sp|P08030|APT_MOUSE Adenine phosphoribosyltransferase OS=Mus musculus (Mouse) OX=10090 GN=Aprt PE=1 SV=2	APRT	12.7493	12.3417	12.2078	12.6811	12.1799	12.5834	11.9369	12.2996	12.5313	12.1002	12.5062	12.294
Q02013	>sp|Q02013|AQP1_MOUSE Aquaporin-1 OS=Mus musculus (Mouse) OX=10090 GN=Aqp1 PE=1 SV=3	AQP1	12.4057	11.6298	12.1113	11.9559	11.562	11.4418	11.6311	11.6003	10.3418	12.5221	11.8943	10.9113
Q8CFQ3	>sp|Q8CFQ3|AQR_MOUSE RNA helicase aquarius OS=Mus musculus (Mouse) OX=10090 GN=Aqr PE=1 SV=2	AQR	11.6456	11.0278	10.0621	10.8054	11.1118	11.4276	10.3571	11.1049	10.8657	11.1769	10.9219	10.7814
P04627	>sp|P04627|ARAF_MOUSE Serine/threonine-protein kinase A-Raf OS=Mus musculus (Mouse) OX=10090 GN=Araf PE=1 SV=2	ARAF	10.2679	10.2821	10.3779	10.5697	10.2283	10.262	10.0254	10.6357	10.4125	10.1112	10.5546	10.1025
P04627;P28028;Q99N57	>sp|P04627|ARAF_MOUSE Serine/threonine-protein kinase A-Raf OS=Mus musculus (Mouse) OX=10090 GN=Araf PE=1 SV=2;>sp|P28028|BRAF_MOUSE Serine/threonine-protein kinase B-raf OS=Mus musculus (Mouse) OX=10090 GN=Braf PE=1 SV=3;>sp|Q99N57|RAF1_MOUSE RAF proto-oncogene serine/threonine-protein kinase OS=Mus musculus (Mouse) OX=10090 GN=Raf1 PE=1 SV=2	ARAF;BRAF;RAF1	12.2152	11.9118	11.3407	12.0242	11.7104	12.3462	11.8048	11.8922	12.053	11.321	11.2973	11.5638
Q5XJY5	>sp|Q5XJY5|COPD_MOUSE Coatomer subunit delta OS=Mus musculus (Mouse) OX=10090 GN=Arcn1 PE=1 SV=2	ARCN1	11.8374	11.4936	11.4967	11.4466	11.5688	11.8672	11.6389	11.8363	11.6165	11.6948	11.5487	11.6036
Q8BSL7	>sp|Q8BSL7|ARF2_MOUSE ADP-ribosylation factor 2 OS=Mus musculus (Mouse) OX=10090 GN=Arf2 PE=1 SV=2	ARF2	14.0215	13.8852	13.9727	13.5908	13.8428	13.7608	13.5893	13.6161	13.5955	13.7977	13.6164	13.5839
P61205;P84078	>sp|P61205|ARF3_MOUSE ADP-ribosylation factor 3 OS=Mus musculus (Mouse) OX=10090 GN=Arf3 PE=2 SV=2;>sp|P84078|ARF1_MOUSE ADP-ribosylation factor 1 OS=Mus musculus (Mouse) OX=10090 GN=Arf1 PE=1 SV=2	ARF3;ARF1		10.8258	11.0296	11.1956	11.816	11.8674
P61750	>sp|P61750|ARF4_MOUSE ADP-ribosylation factor 4 OS=Mus musculus (Mouse) OX=10090 GN=Arf4 PE=1 SV=2	ARF4	12.3569	12.255	12.5401	12.0534	12.3209	12.0446	12.0377	11.7548	12.2767	11.7721	12.1059	12.0009
P61750;P84084;Q8BSL7	>sp|P61750|ARF4_MOUSE ADP-ribosylation factor 4 OS=Mus musculus (Mouse) OX=10090 GN=Arf4 PE=1 SV=2;>sp|P84084|ARF5_MOUSE ADP-ribosylation factor 5 OS=Mus musculus (Mouse) OX=10090 GN=Arf5 PE=1 SV=2;>sp|Q8BSL7|ARF2_MOUSE ADP-ribosylation factor 2 OS=Mus musculus (Mouse) OX=10090 GN=Arf2 PE=1 SV=2	ARF4;ARF5;ARF2	14.9014	14.5262	14.392	14.1888	14.2984	14.2859	14.2567	14.3823	14.2298	14.3084	14.1201	13.9945
P84084	>sp|P84084|ARF5_MOUSE ADP-ribosylation factor 5 OS=Mus musculus (Mouse) OX=10090 GN=Arf5 PE=1 SV=2	ARF5	12.0396	11.966	11.2618	11.8495	11.621	11.69	11.7836	11.8799	11.7411	12.0297	11.699	11.8295
P62331	>sp|P62331|ARF6_MOUSE ADP-ribosylation factor 6 OS=Mus musculus (Mouse) OX=10090 GN=Arf6 PE=1 SV=2	ARF6	12.4966	12.5922	12.2782	12.2291	12.2576	12.3562	12.4489	12.1984	12.8146	12.6791	12.3313	12.5693
Q9EPJ9	>sp|Q9EPJ9|ARFG1_MOUSE ADP-ribosylation factor GTPase-activating protein 1 OS=Mus musculus (Mouse) OX=10090 GN=Arfgap1 PE=1 SV=2	ARFGAP1	10.3539	10.2389		10.6533	10.2229	10.308	10.5256	10.4604	10.2084		10.2923	10.0364
Q99K28	>sp|Q99K28|ARFG2_MOUSE ADP-ribosylation factor GTPase-activating protein 2 OS=Mus musculus (Mouse) OX=10090 GN=Arfgap2 PE=1 SV=1	ARFGAP2	11.8403	11.3095	10.7004	11.5681	11.4578	11.1972	11.1959	11.0856	10.8497	11.2465	10.6597	10.8872
Q9D8S3	>sp|Q9D8S3|ARFG3_MOUSE ADP-ribosylation factor GTPase-activating protein 3 OS=Mus musculus (Mouse) OX=10090 GN=Arfgap3 PE=1 SV=2	ARFGAP3							10.2162	9.95154	9.78196	9.46421		8.97438
G3X9K3	>sp|G3X9K3|BIG1_MOUSE Brefeldin A-inhibited guanine nucleotide-exchange protein 1 OS=Mus musculus (Mouse) OX=10090 GN=Arfgef1 PE=1 SV=1	ARFGEF1	10.1514	11.4114	10.3922	11.7996	10.6227	11.6557
A2A5R2	>sp|A2A5R2|BIG2_MOUSE Brefeldin A-inhibited guanine nucleotide-exchange protein 2 OS=Mus musculus (Mouse) OX=10090 GN=Arfgef2 PE=1 SV=1	ARFGEF2	9.80402	9.97662	10.7991	10.996	10.616	10.3001	10.2293	9.96525	10.2508	10.615	10.4911	10.1979
A2A5R2;G3X9K3	>sp|A2A5R2|BIG2_MOUSE Brefeldin A-inhibited guanine nucleotide-exchange protein 2 OS=Mus musculus (Mouse) OX=10090 GN=Arfgef2 PE=1 SV=1;>sp|G3X9K3|BIG1_MOUSE Brefeldin A-inhibited guanine nucleotide-exchange protein 1 OS=Mus musculus (Mouse) OX=10090 GN=Arfgef1 PE=1 SV=1	ARFGEF2;ARFGEF1	11.2926	11.6436	11.1022	11.3804	11.2333	11.3469	11.0188	11.5122	10.7962	11.4078	11.018	11.0904
G5E8V9	>tr|G5E8V9|G5E8V9_MOUSE ADP-ribosylation factor-interacting protein 1 OS=Mus musculus (Mouse) OX=10090 GN=Arfip1 PE=1 SV=1	ARFIP1	11.301	11.3809	11.0885	11.6399	11.1617	11.6079	11.2848	11.3154	11.0645	11.2945	11.1446	11.0555
Q8K221	>sp|Q8K221|ARFP2_MOUSE Arfaptin-2 OS=Mus musculus (Mouse) OX=10090 GN=Arfip2 PE=1 SV=2	ARFIP2	10.5813	11.4847	10.472	11.0828	11.605	10.9804	10.9623	11.2051	10.2511	10.7041	10.9222	11.2065
Q8BXL7	>sp|Q8BXL7|ARFRP_MOUSE ADP-ribosylation factor-related protein 1 OS=Mus musculus (Mouse) OX=10090 GN=Arfrp1 PE=1 SV=2	ARFRP1	10.9842	10.675	10.9777	10.3921	10.6485	10.219	10.5013	10.2607	10.3316	10.3305	10.2473	10.0852
Q5FWK3	>sp|Q5FWK3|RHG01_MOUSE Rho GTPase-activating protein 1 OS=Mus musculus (Mouse) OX=10090 GN=Arhgap1 PE=1 SV=1	ARHGAP1	12.2554	12.3258	12.2502	12.0239	12.1558	12.4931	12.0913	12.4335	12.3339	11.7161	11.8832	12.0012
Q3UIA2	>sp|Q3UIA2|RHG17_MOUSE Rho GTPase-activating protein 17 OS=Mus musculus (Mouse) OX=10090 GN=Arhgap17 PE=1 SV=1	ARHGAP17	10.1618	11.3375		10.9998	10.8815	10.5459	10.4851	10.9265	11.0046	10.5436	10.7058	10.7854
Q8K0Q5	>sp|Q8K0Q5|RHG18_MOUSE Rho GTPase-activating protein 18 OS=Mus musculus (Mouse) OX=10090 GN=Arhgap18 PE=1 SV=1	ARHGAP18	10.9923	11.1157	10.9983	10.0025	10.6129		10.8172	11.1079	10.8774	10.807	10.8248	10.5041
Q6ZQ82	>sp|Q6ZQ82|RHG26_MOUSE Rho GTPase-activating protein 26 OS=Mus musculus (Mouse) OX=10090 GN=Arhgap26 PE=1 SV=3	ARHGAP26	10.0066	10.435	9.99695		10.7093	10.8385	10.3761	10.7738	9.10548	10.7475	11.1474	10.4389
Q91YM2	>sp|Q91YM2|RHG35_MOUSE Rho GTPase-activating protein 35 OS=Mus musculus (Mouse) OX=10090 GN=Arhgap35 PE=1 SV=3	ARHGAP35	9.41305	9.56319		10.0339	9.54662	10.2144
Q99PT1	>sp|Q99PT1|GDIR1_MOUSE Rho GDP-dissociation inhibitor 1 OS=Mus musculus (Mouse) OX=10090 GN=Arhgdia PE=1 SV=3	ARHGDIA	14.2454	14.1238	14.0673	13.8532	13.9556	14.2714	14.155	14.1458	13.8435	13.6924	13.8259	13.9881
Q61599	>sp|Q61599|GDIR2_MOUSE Rho GDP-dissociation inhibitor 2 OS=Mus musculus (Mouse) OX=10090 GN=Arhgdib PE=1 SV=3	ARHGDIB	11.3553	11.326	10.9346	9.55237	10.6607	10.8411	10.0666	9.83447	9.84008		9.65791	9.54664
Q61210	>sp|Q61210|ARHG1_MOUSE Rho guanine nucleotide exchange factor 1 OS=Mus musculus (Mouse) OX=10090 GN=Arhgef1 PE=1 SV=2	ARHGEF1	11.7629	11.6183	11.2233		10.7909	11.6322	9.74223	9.65372	9.72529	9.58648		9.60758
Q8R4H2	>sp|Q8R4H2|ARHGC_MOUSE Rho guanine nucleotide exchange factor 12 OS=Mus musculus (Mouse) OX=10090 GN=Arhgef12 PE=1 SV=2	ARHGEF12	11.1223	11.081	10.2765	10.4675	11.0444	10.7257	11.004	10.6318	11.0737	10.3976	10.8503	10.8922
Q80U35	>sp|Q80U35|ARHGH_MOUSE Rho guanine nucleotide exchange factor 17 OS=Mus musculus (Mouse) OX=10090 GN=Arhgef17 PE=1 SV=2	ARHGEF17							10.2828	9.88313	10.1105	10.1874	10.8393	10.0447
Q8K4I3;Q9ES28	>sp|Q8K4I3|ARHG6_MOUSE Rho guanine nucleotide exchange factor 6 OS=Mus musculus (Mouse) OX=10090 GN=Arhgef6 PE=1 SV=1;>sp|Q9ES28|ARHG7_MOUSE Rho guanine nucleotide exchange factor 7 OS=Mus musculus (Mouse) OX=10090 GN=Arhgef7 PE=1 SV=2	ARHGEF6;ARHGEF7	11.1493	10.4169	10.1508		10.2933	11.3865	10.2532	9.51523	11.307	12.0672		11.0387
Q9Z1K5	>sp|Q9Z1K5|ARI1_MOUSE E3 ubiquitin-protein ligase ARIH1 OS=Mus musculus (Mouse) OX=10090 GN=Arih1 PE=1 SV=3	ARIH1	11.0468	10.6404	10.8262	10.9817	10.7655	10.8437	10.9015	10.836	10.6526	11.0909	9.82516	10.9449
P61211	>sp|P61211|ARL1_MOUSE ADP-ribosylation factor-like protein 1 OS=Mus musculus (Mouse) OX=10090 GN=Arl1 PE=1 SV=1	ARL1	12.6579	12.6413	12.6179	12.2404	12.3229	12.1165	12.2454	12.3228	12.6226	12.2674	11.9952	11.9662
Q9QXJ4	>sp|Q9QXJ4|ARL10_MOUSE ADP-ribosylation factor-like protein 10 OS=Mus musculus (Mouse) OX=10090 GN=Arl10 PE=1 SV=2	ARL10	12.4283	13.0262	12.8956	13.1464	12.8382	11.8931	12.6338	12.7863	13.232	12.7564	12.9624	12.8441
Q8BGR6	>sp|Q8BGR6|ARL15_MOUSE ADP-ribosylation factor-like protein 15 OS=Mus musculus (Mouse) OX=10090 GN=Arl15 PE=1 SV=1	ARL15	11.9093	11.642	12.1252	11.0323	11.871	12.1717	11.7106	11.8292	11.5387	11.2028	12.0063	11.2493
Q9D0J4	>sp|Q9D0J4|ARL2_MOUSE ADP-ribosylation factor-like protein 2 OS=Mus musculus (Mouse) OX=10090 GN=Arl2 PE=1 SV=1	ARL2	11.5833	11.959	11.6243	11.5016	11.6466	11.6917	11.6486	11.6959	11.8851	11.7813	11.8004	11.792
Q9WUL7	>sp|Q9WUL7|ARL3_MOUSE ADP-ribosylation factor-like protein 3 OS=Mus musculus (Mouse) OX=10090 GN=Arl3 PE=1 SV=1	ARL3	12.2774	12.4277	12.2412	11.7555	11.9689	12.0237	12.1672	12.4504	12.2944	11.7764	11.4152	11.8871
O88848	>sp|O88848|ARL6_MOUSE ADP-ribosylation factor-like protein 6 OS=Mus musculus (Mouse) OX=10090 GN=Arl6 PE=1 SV=1	ARL6	10.6118	10.3847		10.2166	9.79031	10.576	10.0739	9.86936	9.99927	10.3615	10.2744	9.7319
Q9JKW0	>sp|Q9JKW0|AR6P1_MOUSE ADP-ribosylation factor-like protein 6-interacting protein 1 OS=Mus musculus (Mouse) OX=10090 GN=Arl6ip1 PE=1 SV=1	ARL6IP1	10.6734	11.2444	10.7211	12.0026	11.8607	10.3972	11.3668	10.3096	10.9277	10.5553	11.5273	11.2405
Q8R5J9	>sp|Q8R5J9|PRAF3_MOUSE PRA1 family protein 3 OS=Mus musculus (Mouse) OX=10090 GN=Arl6ip5 PE=1 SV=2	ARL6IP5	12.6568	12.5587	12.2729	12.2331	12.7328	12.4218	12.5424	12.3147	12.7215	12.1394	12.617	12.6897
Q8VEH3	>sp|Q8VEH3|ARL8A_MOUSE ADP-ribosylation factor-like protein 8A OS=Mus musculus (Mouse) OX=10090 GN=Arl8a PE=1 SV=1	ARL8A	11.6727	11.5443	11.2735	11.2285	11.6651	11.9385	11.5781	11.1496	11.3944	11.1207	11.0144	11.5418
Q8VEH3;Q9CQW2	>sp|Q8VEH3|ARL8A_MOUSE ADP-ribosylation factor-like protein 8A OS=Mus musculus (Mouse) OX=10090 GN=Arl8a PE=1 SV=1;>sp|Q9CQW2|ARL8B_MOUSE ADP-ribosylation factor-like protein 8B OS=Mus musculus (Mouse) OX=10090 GN=Arl8b PE=1 SV=1	ARL8A;ARL8B	11.9449	12.017	10.9174	10.2586	11.3738	11.3778	11.7115	11.7702	11.6487	11.5478	10.8749	10.7902
Q9CQW2	>sp|Q9CQW2|ARL8B_MOUSE ADP-ribosylation factor-like protein 8B OS=Mus musculus (Mouse) OX=10090 GN=Arl8b PE=1 SV=1	ARL8B	11.776	11.3694	12.3869	12.0054	11.7329	12.1679	11.2669	11.6921	11.508	12.3063	12.0705	11.6679
Q9D7A8	>sp|Q9D7A8|ARMC1_MOUSE Armadillo repeat-containing protein 1 OS=Mus musculus (Mouse) OX=10090 GN=Armc1 PE=1 SV=1	ARMC1	11.5053	11.4088	11.1904	11.5804	11.8521	11.6806	11.965	11.7522	11.7497	11.7271	12.1752	11.8352
Q9D0L7	>sp|Q9D0L7|ARM10_MOUSE Armadillo repeat-containing protein 10 OS=Mus musculus (Mouse) OX=10090 GN=Armc10 PE=1 SV=1	ARMC10	11.9308	12.2197	12.3453	12.1879	11.9713	11.9241	12.0294	11.8833	11.9818	11.7915	11.9311	11.9717
Q8BNU0	>sp|Q8BNU0|ARMC6_MOUSE Armadillo repeat-containing protein 6 OS=Mus musculus (Mouse) OX=10090 GN=Armc6 PE=1 SV=1	ARMC6	12.5996	12.5632	12.5282	12.664	13.0534	12.8927	12.7557	12.8691	12.8788	12.8948	12.9791	13.1433
Q9DBR3	>sp|Q9DBR3|ARMC8_MOUSE Armadillo repeat-containing protein 8 OS=Mus musculus (Mouse) OX=10090 GN=Armc8 PE=1 SV=2	ARMC8	11.4304	11.5823	10.3522	10.8487	11.2624	10.709	10.8877	11.0124	10.7548	10.7244	10.536	10.6123
Q9CX83	>sp|Q9CX83|ARMX1_MOUSE Armadillo repeat-containing X-linked protein 1 OS=Mus musculus (Mouse) OX=10090 GN=Armcx1 PE=1 SV=1	ARMCX1	11.7559	10.425	10.7949		11.2675	11.2258	10.3712	10.8981	10.7155		11.6764	10.7196
Q9R0Q6	>sp|Q9R0Q6|ARC1A_MOUSE Actin-related protein 2/3 complex subunit 1A OS=Mus musculus (Mouse) OX=10090 GN=Arpc1a PE=1 SV=1	ARPC1A	10.043	10.1962		10.9563	10.308	11.211	10.4892	9.99481	10.4211	10.7319	10.6574	10.0446
Q9WV32	>sp|Q9WV32|ARC1B_MOUSE Actin-related protein 2/3 complex subunit 1B OS=Mus musculus (Mouse) OX=10090 GN=Arpc1b PE=1 SV=4	ARPC1B	11.449	11.1632	11.4246	11.4249	11.6535	11.9391	10.92	11.1408	10.9468	11.2139	11.0974	11.1397
Q9CVB6	>sp|Q9CVB6|ARPC2_MOUSE Actin-related protein 2/3 complex subunit 2 OS=Mus musculus (Mouse) OX=10090 GN=Arpc2 PE=1 SV=3	ARPC2	11.9148	11.6933	11.8768	11.8816	11.8156	12.0577	11.7006	11.6609	11.4829	12.0755	11.6182	11.6192
Q9JM76	>sp|Q9JM76|ARPC3_MOUSE Actin-related protein 2/3 complex subunit 3 OS=Mus musculus (Mouse) OX=10090 GN=Arpc3 PE=1 SV=3	ARPC3	12.1795	11.7817	11.9117	11.4995	11.8943	11.8448	11.7523	11.8751	11.8409	12.0178	12.0392	11.6766
P59999	>sp|P59999|ARPC4_MOUSE Actin-related protein 2/3 complex subunit 4 OS=Mus musculus (Mouse) OX=10090 GN=Arpc4 PE=1 SV=3	ARPC4	14.2251	14.0682	14.1035	13.5119	13.8518	14.1196	13.7755	13.9932	13.8726	14.0704	13.5677	13.8326
Q9CPW4	>sp|Q9CPW4|ARPC5_MOUSE Actin-related protein 2/3 complex subunit 5 OS=Mus musculus (Mouse) OX=10090 GN=Arpc5 PE=1 SV=3	ARPC5	11.496	11.8407	11.5672	11.7224	11.7506	11.9894	11.7068	11.938	11.8793	11.7997	12.302	11.6939
Q9D898	>sp|Q9D898|ARP5L_MOUSE Actin-related protein 2/3 complex subunit 5-like protein OS=Mus musculus (Mouse) OX=10090 GN=Arpc5l PE=1 SV=1	ARPC5L	12.3122	12.0089	11.9652	11.2474	11.7345	11.8393	11.91	12.1985	11.8063	11.5861	11.8263	11.9374
Q8BWG8	>sp|Q8BWG8|ARRB1_MOUSE Beta-arrestin-1 OS=Mus musculus (Mouse) OX=10090 GN=Arrb1 PE=1 SV=1	ARRB1	11.09	11.2943	10.5008	10.7472	10.7991	10.9961	10.7124	10.9532	10.2243	10.5916	10.3316	10.3311
P50428	>sp|P50428|ARSA_MOUSE Arylsulfatase A OS=Mus musculus (Mouse) OX=10090 GN=Arsa PE=1 SV=2	ARSA	9.32981	8.24095	9.32542		9.47617	10.1485	10.2696	9.53533	9.43823		9.95164	9.8564
P50429	>sp|P50429|ARSB_MOUSE Arylsulfatase B OS=Mus musculus (Mouse) OX=10090 GN=Arsb PE=1 SV=3	ARSB	11.0604	11.1591	11.6894	11.7439	11.239	11.5993	11.4164	11.6869	11.3369	11.7213	11.7162	11.2951
P98203	>sp|P98203|ARVC_MOUSE Armadillo repeat protein deleted in velo-cardio-facial syndrome homolog OS=Mus musculus (Mouse) OX=10090 GN=Arvcf PE=1 SV=2	ARVCF	10.3576	10.6366	10.3774	9.55127	10.58	10.8082	10.2825	10.3349	10.3647		10.7368	9.74502
C0HK79;C0HK80	>sp|C0HK79|ARXS1_MOUSE Adipocyte-related X-chromosome expressed sequence 1 OS=Mus musculus (Mouse) OX=10090 GN=Arxes1 PE=1 SV=1;>sp|C0HK80|ARXS2_MOUSE Adipocyte-related X-chromosome expressed sequence 2 OS=Mus musculus (Mouse) OX=10090 GN=Arxes2 PE=1 SV=1	ARXES1;ARXES2	10.5075	11.109	11.146	10.7285	10.4206	10.3424	10.8294	10.8794	10.759	11.0319	10.7325	10.6728
Q91WU5	>sp|Q91WU5|AS3MT_MOUSE Arsenite methyltransferase OS=Mus musculus (Mouse) OX=10090 GN=As3mt PE=1 SV=2	AS3MT	11.563	11.5312	11.6297	11.5167	11.4526	11.9482	11.7257	11.8132	11.717	12.0465	11.6684	11.8198
Q9WV54	>sp|Q9WV54|ASAH1_MOUSE Acid ceramidase OS=Mus musculus (Mouse) OX=10090 GN=Asah1 PE=1 SV=1	ASAH1	12.756	12.759	12.9064	12.6008	13.0096	12.8013	12.9624	12.9377	12.7195	12.3768	12.8829	12.8165
Q91WR3	>sp|Q91WR3|ASCC2_MOUSE Activating signal cointegrator 1 complex subunit 2 OS=Mus musculus (Mouse) OX=10090 GN=Ascc2 PE=1 SV=1	ASCC2	10.7003	10.9649	11.1638		10.4827	10.3414	10.5046	10.7209	10.0803		10.089	10.3861
E9PZJ8	>sp|E9PZJ8|ASCC3_MOUSE Activating signal cointegrator 1 complex subunit 3 OS=Mus musculus (Mouse) OX=10090 GN=Ascc3 PE=1 SV=1	ASCC3	10.2765	10.1784	9.94187	10.6152	10.5191	10.4163
Q91X20	>sp|Q91X20|ASH2L_MOUSE Set1/Ash2 histone methyltransferase complex subunit ASH2 OS=Mus musculus (Mouse) OX=10090 GN=Ash2l PE=1 SV=1	ASH2L							9.91422	10.0112	10.0401	10.078		9.71413
Q91YI0	>sp|Q91YI0|ARLY_MOUSE Argininosuccinate lyase OS=Mus musculus (Mouse) OX=10090 GN=Asl PE=1 SV=1	ASL	10.9988	11.265	11.4283	11.0631	10.9067	11.0358	11.4707	11.4386	11.5321	11.4567	11.5735	11.3993
O54984	>sp|O54984|ASNA_MOUSE ATPase Asna1 OS=Mus musculus (Mouse) OX=10090 GN=Asna1 PE=1 SV=2	ASNA1	12.1903	12.4226	12.0609	11.9152	12.1938	12.5119	12.2598	12.4679	12.4735	12.0815	12.1943	12.4176
Q61024	>sp|Q61024|ASNS_MOUSE Asparagine synthetase [glutamine-hydrolyzing] OS=Mus musculus (Mouse) OX=10090 GN=Asns PE=1 SV=3	ASNS	11.4308	11.2992	10.6307	10.8919	11.4312	11.9537
Q8BSY0	>sp|Q8BSY0|ASPH_MOUSE Aspartyl/asparaginyl beta-hydroxylase OS=Mus musculus (Mouse) OX=10090 GN=Asph PE=1 SV=1	ASPH	12.1674	12.5039	12.3129	12.1786	12.273	12.0475	12.0944	11.9892	12.1435	11.7577	11.9868	12.0865
Q8VBT9	>sp|Q8VBT9|ASPC1_MOUSE Tether containing UBX domain for GLUT4 OS=Mus musculus (Mouse) OX=10090 GN=Aspscr1 PE=1 SV=1	ASPSCR1	10.9643	10.8495	10.347	10.1258	10.7037	10.6908	10.7423	10.6589	10.037	10.6509	10.3216	9.69638
Q8C0M9	>sp|Q8C0M9|ASGL1_MOUSE Isoaspartyl peptidase/L-asparaginase OS=Mus musculus (Mouse) OX=10090 GN=Asrgl1 PE=1 SV=1	ASRGL1	10.1754	9.69698	10.2393	10.1743	10.2202	10.7094	9.89474	10.5353	10.1107	10.9543	10.1052	10.3758
P16460	>sp|P16460|ASSY_MOUSE Argininosuccinate synthase OS=Mus musculus (Mouse) OX=10090 GN=Ass1 PE=1 SV=1	ASS1	12.0493	12.1204		12.8846	12.7077	12.5756	11.3953	11.3049	12.027	11.8143	11.6955	11.9515
Q9D5T0	>sp|Q9D5T0|ATAD1_MOUSE ATPase family AAA domain-containing protein 1 OS=Mus musculus (Mouse) OX=10090 GN=Atad1 PE=1 SV=1	ATAD1	12.2556	12.4424	12.2452	12.5607	11.9951	11.9674	12.2913	12.0894	12.6714	12.4453	12.5214	12.5242
Q925I1	>sp|Q925I1|ATAD3_MOUSE ATPase family AAA domain-containing protein 3 OS=Mus musculus (Mouse) OX=10090 GN=Atad3 PE=1 SV=1	ATAD3	12.6152	12.6638	12.7899	13.0427	13.0962	12.9277	12.7985	12.5908	12.997	12.7117	13.0877	12.9993
Q9Z2A5	>sp|Q9Z2A5|ATE1_MOUSE Arginyl-tRNA--protein transferase 1 OS=Mus musculus (Mouse) OX=10090 GN=Ate1 PE=1 SV=2	ATE1	10.18	9.96475	10.3307	10.1672		9.86402
P16951	>sp|P16951|ATF2_MOUSE Cyclic AMP-dependent transcription factor ATF-2 OS=Mus musculus (Mouse) OX=10090 GN=Atf2 PE=1 SV=2	ATF2							9.03873	8.35639		10.1062	10.2163	8.8423
Q9CPX6	>sp|Q9CPX6|ATG3_MOUSE Ubiquitin-like-conjugating enzyme ATG3 OS=Mus musculus (Mouse) OX=10090 GN=Atg3 PE=1 SV=1	ATG3	11.1822	10.88	10.8565	10.4119	11.2511	11.3345	11.1213	10.9804	10.8358	10.4685	11.0839	10.7831
Q99J83	>sp|Q99J83|ATG5_MOUSE Autophagy protein 5 OS=Mus musculus (Mouse) OX=10090 GN=Atg5 PE=1 SV=1	ATG5							10.6568	10.2556	10.2926		11.2613	10.6856
Q9D906	>sp|Q9D906|ATG7_MOUSE Ubiquitin-like modifier-activating enzyme ATG7 OS=Mus musculus (Mouse) OX=10090 GN=Atg7 PE=1 SV=1	ATG7	11.3925	11.7388	10.9429	10.4671	11.1571	11.5723	11.7463	11.856	11.5661	11.2095	11.2518	11.5031
Q9CWJ9	>sp|Q9CWJ9|PUR9_MOUSE Bifunctional purine biosynthesis protein PURH OS=Mus musculus (Mouse) OX=10090 GN=Atic PE=1 SV=2	ATIC	12.8435	12.5406	12.8229	12.971	12.5842	13.0422	12.7161	12.9129	12.5253	12.4769	12.5552	12.5787
Q6PA06	>sp|Q6PA06|ATLA2_MOUSE Atlastin-2 OS=Mus musculus (Mouse) OX=10090 GN=Atl2 PE=1 SV=1	ATL2	10.3989	10.2838	10.7549	11.0994	10.5463	10.3713	10.3983	10.2692	10.1842	10.378	10.8675	10.6071
Q91YH5	>sp|Q91YH5|ATLA3_MOUSE Atlastin-3 OS=Mus musculus (Mouse) OX=10090 GN=Atl3 PE=1 SV=1	ATL3	11.6275	11.4699	11.7925	11.9955	11.5626	11.8405	11.8183	11.7504	11.7974	11.8966	11.901	11.8807
Q9EPE9	>sp|Q9EPE9|AT131_MOUSE Manganese-transporting ATPase 13A1 OS=Mus musculus (Mouse) OX=10090 GN=Atp13a1 PE=1 SV=2	ATP13A1	11.745	11.6507	11.6005	11.637	11.7323	11.7565	11.4089	11.5123	11.5504	11.759	11.6481	11.5882
Q8VDN2	>sp|Q8VDN2|AT1A1_MOUSE Sodium/potassium-transporting ATPase subunit alpha-1 OS=Mus musculus (Mouse) OX=10090 GN=Atp1a1 PE=1 SV=1	ATP1A1	13.9642	13.9087	14.0101	13.8296	13.9406	14.0168	13.6956	13.6365	13.5974	13.7886	13.6126	13.6215
Q6PIE5	>sp|Q6PIE5|AT1A2_MOUSE Sodium/potassium-transporting ATPase subunit alpha-2 OS=Mus musculus (Mouse) OX=10090 GN=Atp1a2 PE=1 SV=1	ATP1A2	11.2684	10.5607	11.2513	10.1253	10.4922	10.93	10.6901	10.4728	10.2121	10.6531		9.92618
Q6PIC6	>sp|Q6PIC6|AT1A3_MOUSE Sodium/potassium-transporting ATPase subunit alpha-3 OS=Mus musculus (Mouse) OX=10090 GN=Atp1a3 PE=1 SV=1	ATP1A3	10.9255	10.2266	11.2367	11.685	10.4752	10.433	11.2492	10.0008	10.7181	11.2601	10.6855	10.7128
Q6PIC6;Q6PIE5	>sp|Q6PIC6|AT1A3_MOUSE Sodium/potassium-transporting ATPase subunit alpha-3 OS=Mus musculus (Mouse) OX=10090 GN=Atp1a3 PE=1 SV=1;>sp|Q6PIE5|AT1A2_MOUSE Sodium/potassium-transporting ATPase subunit alpha-2 OS=Mus musculus (Mouse) OX=10090 GN=Atp1a2 PE=1 SV=1	ATP1A3;ATP1A2	13.2239	12.8074	12.7592	12.3417	12.1588	12.7876	13.1448	12.2458	12.3725	12.5273	12.6128	12.3073
Q6PIC6;Q6PIE5;Q8VDN2	>sp|Q6PIC6|AT1A3_MOUSE Sodium/potassium-transporting ATPase subunit alpha-3 OS=Mus musculus (Mouse) OX=10090 GN=Atp1a3 PE=1 SV=1;>sp|Q6PIE5|AT1A2_MOUSE Sodium/potassium-transporting ATPase subunit alpha-2 OS=Mus musculus (Mouse) OX=10090 GN=Atp1a2 PE=1 SV=1;>sp|Q8VDN2|AT1A1_MOUSE Sodium/potassium-transporting ATPase subunit alpha-1 OS=Mus musculus (Mouse) OX=10090 GN=Atp1a1 PE=1 SV=1	ATP1A3;ATP1A2;ATP1A1	14.3108	14.2667	14.2946	14.1567	14.2847	14.2544	14.1081	13.9626	13.9913	14.0004	13.8522	13.9796
P14094	>sp|P14094|AT1B1_MOUSE Sodium/potassium-transporting ATPase subunit beta-1 OS=Mus musculus (Mouse) OX=10090 GN=Atp1b1 PE=1 SV=1	ATP1B1	13.4191	13.2564	13.3628	13.0969	13.2375	13.4969	13.2145	13.2898	12.9045	12.8605	12.7466	12.7867
P14231	>sp|P14231|AT1B2_MOUSE Sodium/potassium-transporting ATPase subunit beta-2 OS=Mus musculus (Mouse) OX=10090 GN=Atp1b2 PE=1 SV=2	ATP1B2	10.4102	9.9861	9.76133	10.4637	10.4168	10.3526	10.557	9.85244	10.0305	10.0175	10.8303	9.7187
P97370	>sp|P97370|AT1B3_MOUSE Sodium/potassium-transporting ATPase subunit beta-3 OS=Mus musculus (Mouse) OX=10090 GN=Atp1b3 PE=1 SV=1	ATP1B3	13.569	13.3798	13.6597	13.4273	13.3705	13.2948	12.7819	12.7429	13.1539	12.6578	12.7753	13.0572
O55143	>sp|O55143|AT2A2_MOUSE Sarcoplasmic/endoplasmic reticulum calcium ATPase 2 OS=Mus musculus (Mouse) OX=10090 GN=Atp2a2 PE=1 SV=2	ATP2A2	12.925	12.8859	13.091	13.0948	12.7976	13.0157	12.6493	12.6208	12.6136	12.6929	12.7387	12.694
O55143;Q64518	>sp|O55143|AT2A2_MOUSE Sarcoplasmic/endoplasmic reticulum calcium ATPase 2 OS=Mus musculus (Mouse) OX=10090 GN=Atp2a2 PE=1 SV=2;>sp|Q64518|AT2A3_MOUSE Sarcoplasmic/endoplasmic reticulum calcium ATPase 3 OS=Mus musculus (Mouse) OX=10090 GN=Atp2a3 PE=1 SV=3	ATP2A2;ATP2A3	12.2137	12.2384	10.9677	11.6374	11.6703	11.6643	11.8806	11.7853	12.0024	12.0026	11.7017	11.4609
G5E829	>sp|G5E829|AT2B1_MOUSE Plasma membrane calcium-transporting ATPase 1 OS=Mus musculus (Mouse) OX=10090 GN=Atp2b1 PE=1 SV=1	ATP2B1	12.0662	12.0111	11.8538	11.9707	11.7581	11.8187	11.9605	11.5638	11.754	11.6162	11.3878	11.6114
G5E829;Q6Q477	>sp|G5E829|AT2B1_MOUSE Plasma membrane calcium-transporting ATPase 1 OS=Mus musculus (Mouse) OX=10090 GN=Atp2b1 PE=1 SV=1;>sp|Q6Q477|AT2B4_MOUSE Plasma membrane calcium-transporting ATPase 4 OS=Mus musculus (Mouse) OX=10090 GN=Atp2b4 PE=1 SV=1	ATP2B1;ATP2B4	12.0307	12.1174	11.9946	11.8613	11.7796	11.8644	11.7086	11.7533	11.5494	11.5892	11.6899	11.5536
Q0VF55	>tr|Q0VF55|Q0VF55_MOUSE Calcium-transporting ATPase OS=Mus musculus (Mouse) OX=10090 GN=Atp2b3 PE=1 SV=1	ATP2B3	11.8815	11.9036	11.8272	12.0842	11.655	11.738	12.3176	12.1997	11.9286	12.2231	11.7938	11.9188
Q6Q477	>sp|Q6Q477|AT2B4_MOUSE Plasma membrane calcium-transporting ATPase 4 OS=Mus musculus (Mouse) OX=10090 GN=Atp2b4 PE=1 SV=1	ATP2B4	11.0095	12.3622		9.95083	11.0561	11.9722
Q03265	>sp|Q03265|ATPA_MOUSE ATP synthase subunit alpha, mitochondrial OS=Mus musculus (Mouse) OX=10090 GN=Atp5f1a PE=1 SV=1	ATP5F1A	15.1661	15.2658	15.626	15.77	15.5702	15.4635	15.1949	15.2004	15.3724	15.7783	15.6417	15.4403
P56480	>sp|P56480|ATPB_MOUSE ATP synthase subunit beta, mitochondrial OS=Mus musculus (Mouse) OX=10090 GN=Atp5f1b PE=1 SV=2	ATP5F1B	16.5684	16.7448	16.9319	16.9174	16.8172	16.5363	16.6031	16.6096	16.8822	16.8619	16.8002	16.7588
Q91VR2	>sp|Q91VR2|ATPG_MOUSE ATP synthase subunit gamma, mitochondrial OS=Mus musculus (Mouse) OX=10090 GN=Atp5f1c PE=1 SV=1	ATP5F1C	14.4996	14.572	14.9244	14.9767	14.7848	14.6108	14.4921	14.4246	14.7706	15.0593	14.9239	14.8297
Q9D3D9	>sp|Q9D3D9|ATPD_MOUSE ATP synthase subunit delta, mitochondrial OS=Mus musculus (Mouse) OX=10090 GN=Atp5f1d PE=1 SV=1	ATP5F1D	16.1714	16.293	16.5728	16.4806	16.3193	16.0427	16.2626	16.2656	16.4665	16.8548	16.2885	16.5704
P56382	>sp|P56382|ATP5E_MOUSE ATP synthase subunit epsilon, mitochondrial OS=Mus musculus (Mouse) OX=10090 GN=Atp5f1e PE=1 SV=2	ATP5F1E	15.4015	14.0964	16.1957	15.1395	15.5191	15.5249	14.4482	15.0687	15.5968	16.3516	15.9205	15.537
O35143	>sp|O35143|ATIF1_MOUSE ATPase inhibitor, mitochondrial OS=Mus musculus (Mouse) OX=10090 GN=ATP5IF1 PE=1 SV=2	ATP5IF1	12.5824	11.6664	12.8702	12.5393	12.7937	12.4858	12.1934	11.8474	12.0144	13.6675	13.4224	12.9483
Q78IK2	>sp|Q78IK2|ATPMD_MOUSE ATP synthase membrane subunit DAPIT, mitochondrial OS=Mus musculus (Mouse) OX=10090 GN=Atp5md PE=1 SV=1	ATP5MD	13.5306	13.0981	13.281	12.5168	13.0702	12.7148	13.1321	13.1152	13.9222	13.866	13.5167	13.2685
Q06185	>sp|Q06185|ATP5I_MOUSE ATP synthase subunit e, mitochondrial OS=Mus musculus (Mouse) OX=10090 GN=Atp5me PE=1 SV=2	ATP5ME	14.4257	14.29	14.4758	13.7603	14.005	13.9334	14.1842	13.9748	14.8436	14.9731	14.7608	14.5812
P56135	>sp|P56135|ATPK_MOUSE ATP synthase subunit f, mitochondrial OS=Mus musculus (Mouse) OX=10090 GN=Atp5mf PE=1 SV=3	ATP5MF	15.5945	15.5414	15.1599	14.0048	14.9141	14.7483	15.2548	15.2564	15.8715	15.5142	15.4212	15.531
Q9CPQ8	>sp|Q9CPQ8|ATP5L_MOUSE ATP synthase subunit g, mitochondrial OS=Mus musculus (Mouse) OX=10090 GN=Atp5mg PE=1 SV=1	ATP5MG	13.7324	14.1845	13.3296	12.7292	14.0062	13.0973	14.0095	13.6648	14.3976	13.9062	14.1215	14.1777
P56379	>sp|P56379|ATP68_MOUSE ATP synthase subunit ATP5MPL, mitochondrial OS=Mus musculus (Mouse) OX=10090 GN=Atp5mpl PE=1 SV=1	ATP5MPL	12.5011	11.8933	12.577	11.8645	12.3709	12.4721	11.7735	12.035	12.8519	13.0744	12.2095	12.8255
Q9CQQ7	>sp|Q9CQQ7|AT5F1_MOUSE ATP synthase F(0) complex subunit B1, mitochondrial OS=Mus musculus (Mouse) OX=10090 GN=Atp5pb PE=1 SV=1	ATP5PB	12.4666	12.6555	12.9657	13.0649	12.9204	12.8167	12.7154	12.4211	12.8039	13.0812	13.0517	12.9057
Q9DCX2	>sp|Q9DCX2|ATP5H_MOUSE ATP synthase subunit d, mitochondrial OS=Mus musculus (Mouse) OX=10090 GN=Atp5pd PE=1 SV=3	ATP5PD	13.7466	13.9059	13.7132	13.8629	14.1386	13.7528	13.8004	13.552	14.1615	14.0249	14.0899	14.164
P97450	>sp|P97450|ATP5J_MOUSE ATP synthase-coupling factor 6, mitochondrial OS=Mus musculus (Mouse) OX=10090 GN=Atp5pf PE=1 SV=1	ATP5PF							10.9414	11.1296	11.1354	11.5351	11.0365	11.1309
Q9DB20	>sp|Q9DB20|ATPO_MOUSE ATP synthase subunit O, mitochondrial OS=Mus musculus (Mouse) OX=10090 GN=Atp5po PE=1 SV=1	ATP5PO	14.358	14.4475	14.4949	14.4531	14.6633	14.3332	14.6255	14.4577	14.7414	14.8991	14.8777	14.7497
Q9R1Q9	>sp|Q9R1Q9|VAS1_MOUSE V-type proton ATPase subunit S1 OS=Mus musculus (Mouse) OX=10090 GN=Atp6ap1 PE=1 SV=1	ATP6AP1	10.7045	11.2342	11.112		10.2579	10.1108	12.0399	10.6408	11.4975	12.436		10.7562
Q9Z1G4	>sp|Q9Z1G4|VPP1_MOUSE V-type proton ATPase 116 kDa subunit a isoform 1 OS=Mus musculus (Mouse) OX=10090 GN=Atp6v0a1 PE=1 SV=3	ATP6V0A1	11.6356	11.3937	11.5022	11.5138	11.4364	11.4124	11.1682	11.4618	11.211	11.0303	11.3678	10.9179
P15920	>sp|P15920|VPP2_MOUSE V-type proton ATPase 116 kDa subunit a isoform 2 OS=Mus musculus (Mouse) OX=10090 GN=Atp6v0a2 PE=1 SV=2	ATP6V0A2	10.2955	11.1421	10.9688	11.4255	10.5142	10.3522	10.7084	10.6591	10.948		11.0733	10.7156
P15920;Q9Z1G4	>sp|P15920|VPP2_MOUSE V-type proton ATPase 116 kDa subunit a isoform 2 OS=Mus musculus (Mouse) OX=10090 GN=Atp6v0a2 PE=1 SV=2;>sp|Q9Z1G4|VPP1_MOUSE V-type proton ATPase 116 kDa subunit a isoform 1 OS=Mus musculus (Mouse) OX=10090 GN=Atp6v0a1 PE=1 SV=3	ATP6V0A2;ATP6V0A1	12.0017	12.3278	11.9369	12.0012	11.6785	11.7404	11.383	11.6184	11.7344	11.3558	11.9354	11.0396
Q920R6	>sp|Q920R6|VPP4_MOUSE V-type proton ATPase 116 kDa subunit a isoform 4 OS=Mus musculus (Mouse) OX=10090 GN=Atp6v0a4 PE=1 SV=1	ATP6V0A4		10.9336	11.7095	12.2401	11.6942	11.0685
P51863	>sp|P51863|VA0D1_MOUSE V-type proton ATPase subunit d 1 OS=Mus musculus (Mouse) OX=10090 GN=Atp6v0d1 PE=1 SV=2	ATP6V0D1	12.463	12.3461	12.6649	12.3809	12.2452	12.156	12.1023	12.1336	12.0758	12.1141	11.7919	12.0073
P50516	>sp|P50516|VATA_MOUSE V-type proton ATPase catalytic subunit A OS=Mus musculus (Mouse) OX=10090 GN=Atp6v1a PE=1 SV=2	ATP6V1A	11.9396	12.0099	12.0748	11.9376	11.9052	12.1935	11.9985	12.0479	11.7297	11.9303	12.0169	11.9338
Q91YH6	>tr|Q91YH6|Q91YH6_MOUSE Vacuolar proton pump subunit B OS=Mus musculus (Mouse) OX=10090 GN=Atp6v1b1 PE=1 SV=1	ATP6V1B1	13.5988	13.5194	12.8993	14.0732	13.691	13.6624	13.4382	13.6243	13.601	13.6025	13.3212	13.4092
P62814	>sp|P62814|VATB2_MOUSE V-type proton ATPase subunit B, brain isoform OS=Mus musculus (Mouse) OX=10090 GN=Atp6v1b2 PE=1 SV=1	ATP6V1B2	12.4488	12.5153	12.311	12.2474	12.483	12.7345	12.5466	12.6136	12.3709	12.1554	12.421	12.2404
Q9Z1G3	>sp|Q9Z1G3|VATC1_MOUSE V-type proton ATPase subunit C 1 OS=Mus musculus (Mouse) OX=10090 GN=Atp6v1c1 PE=1 SV=4	ATP6V1C1	11.228	11.0809	11.4243	11.9224	11.286	11.5401	11.5505	11.1608	11.3139	11.3151	11.2274	11.1215
P57746	>sp|P57746|VATD_MOUSE V-type proton ATPase subunit D OS=Mus musculus (Mouse) OX=10090 GN=Atp6v1d PE=1 SV=1	ATP6V1D	10.8598	11.2685	10.5337	10.7425	10.8765	11.0145	10.9124	11.1927	10.8744	10.3354	10.5729	10.712
P50518	>sp|P50518|VATE1_MOUSE V-type proton ATPase subunit E 1 OS=Mus musculus (Mouse) OX=10090 GN=Atp6v1e1 PE=1 SV=2	ATP6V1E1	11.7394	11.4672	11.8457	11.9854	11.759	11.8593	11.6117	11.6614	11.3426	12.008	11.5171	11.6444
Q9D1K2	>sp|Q9D1K2|VATF_MOUSE V-type proton ATPase subunit F OS=Mus musculus (Mouse) OX=10090 GN=Atp6v1f PE=1 SV=2	ATP6V1F	10.0581	10.7082	11.9622	11.3541	10.5769	11.742
Q9CR51	>sp|Q9CR51|VATG1_MOUSE V-type proton ATPase subunit G 1 OS=Mus musculus (Mouse) OX=10090 GN=Atp6v1g1 PE=1 SV=3	ATP6V1G1	11.905	11.3431	11.3162	11.3726	11.7146	11.214	11.7571	11.5071	12.0009	11.7813	12.2056	12.0525
Q8BVE3	>sp|Q8BVE3|VATH_MOUSE V-type proton ATPase subunit H OS=Mus musculus (Mouse) OX=10090 GN=Atp6v1h PE=1 SV=1	ATP6V1H	11.6317	11.5908	11.6862	11.6566	11.5769	11.7491	11.4223	11.6488	11.3992	11.0739	11.3694	11.4774
P70704	>sp|P70704|AT8A1_MOUSE Phospholipid-transporting ATPase IA OS=Mus musculus (Mouse) OX=10090 GN=Atp8a1 PE=1 SV=2	ATP8A1	9.43392	9.88888	10.1054		10.2026	10.2755
Q811I0	>sp|Q811I0|ATPF1_MOUSE ATP synthase mitochondrial F1 complex assembly factor 1 OS=Mus musculus (Mouse) OX=10090 GN=Atpaf1 PE=1 SV=1	ATPAF1	11.6462	11.4841	11.3536	11.2885	11.6084	11.0656	11.3103	11.2428	11.5443	11.3042	11.0351	11.3408
Q91YY4	>sp|Q91YY4|ATPF2_MOUSE ATP synthase mitochondrial F1 complex assembly factor 2 OS=Mus musculus (Mouse) OX=10090 GN=Atpaf2 PE=1 SV=1	ATPAF2	10.9674	11.3821	11.4766	11.6647	11.1385	10.9063	11.5149	11.6412	11.1685	11.4817	11.4762	11.1746
Q9D1Z3	>sp|Q9D1Z3|ACKMT_MOUSE ATP synthase subunit C lysine N-methyltransferase OS=Mus musculus (Mouse) OX=10090 GN=Atpsckmt PE=1 SV=1	ATPSCKMT	9.32139	9.07666	9.77486	9.73489	10.4019	9.39043	9.65237	8.81215	10.4623	10.1113	10.3132	9.74845
Q61687	>sp|Q61687|ATRX_MOUSE Transcriptional regulator ATRX OS=Mus musculus (Mouse) OX=10090 GN=Atrx PE=1 SV=3	ATRX	9.83788	8.97565	10.5299	10.6816	9.8801	10.4988	9.7982	9.97198	9.68727	10.1396	9.63348	9.96545
P28658	>sp|P28658|ATX10_MOUSE Ataxin-10 OS=Mus musculus (Mouse) OX=10090 GN=Atxn10 PE=1 SV=2	ATXN10	11.0505	10.8464	11.0292	11.1167	11.0941	11.1505	10.9505	11.1021	10.7443	11.3868	10.9662	10.7173
O70305	>sp|O70305|ATX2_MOUSE Ataxin-2 OS=Mus musculus (Mouse) OX=10090 GN=Atxn2 PE=1 SV=1	ATXN2							10.4492	10.0906	10.1528	9.99896	10.5235	9.56743
Q7TQH0	>sp|Q7TQH0|ATX2L_MOUSE Ataxin-2-like protein OS=Mus musculus (Mouse) OX=10090 GN=Atxn2l PE=1 SV=1	ATXN2L	11.2404	11.5595	10.682	10.3242	10.3149	10.9329	11.0751	11.3348	11.1861		11.3614	11.2355
Q9JLZ3	>sp|Q9JLZ3|AUHM_MOUSE Methylglutaconyl-CoA hydratase, mitochondrial OS=Mus musculus (Mouse) OX=10090 GN=Auh PE=1 SV=1	AUH	13.7522	13.7963	14.2444	14.1877	14.0272	13.9136	13.9239	13.8923	14.1558	14.3781	14.2733	14.0586
E9Q6Z5	>sp|E9Q6Z5|AUNIP_MOUSE Aurora kinase A and ninein-interacting protein OS=Mus musculus (Mouse) OX=10090 GN=Aunip PE=2 SV=1	AUNIP	11.8505	12.3488	12.7749	11.5172	12.3196	12.5104
P70295	>sp|P70295|AUP1_MOUSE Ancient ubiquitous protein 1 OS=Mus musculus (Mouse) OX=10090 GN=Aup1 PE=1 SV=1	AUP1	11.1546	11.3238	10.9948	10.2938	11.3082	10.9097	11.262	11.2616	11.0452	11.2659	11.1051	11.2167
P01887	>sp|P01887|B2MG_MOUSE Beta-2-microglobulin OS=Mus musculus (Mouse) OX=10090 GN=B2m PE=1 SV=2	B2M	12.9544	12.9126	13.2269	12.8289	13.5575	13.3141	11.0308	10.3438	11.2125	12.3599	12.0273	11.6088
Q91Z92	>sp|Q91Z92|B3GT6_MOUSE Beta-1,3-galactosyltransferase 6 OS=Mus musculus (Mouse) OX=10090 GN=B3galt6 PE=2 SV=1	B3GALT6	10.2889	10.278	10.8053	9.46638	10.4857	10.1814	9.77096	9.97298	10.2871	11.165	10.5031	9.97185
P58158	>sp|P58158|B3GA3_MOUSE Galactosylgalactosylxylosylprotein 3-beta-glucuronosyltransferase 3 OS=Mus musculus (Mouse) OX=10090 GN=B3gat3 PE=1 SV=1	B3GAT3							11.1396	10.9798	11.1301		11.6791	10.8814
Q8BHT6	>sp|Q8BHT6|B3GLT_MOUSE Beta-1,3-glucosyltransferase OS=Mus musculus (Mouse) OX=10090 GN=B3glct PE=1 SV=3	B3GLCT	11.4068	11.39	11.1058	11.9583	11.4143	11.4849	11.3138	11.4818	11.0554	11.2329	11.2754	11.1085
Q9Z222	>sp|Q9Z222|B3GN2_MOUSE N-acetyllactosaminide beta-1,3-N-acetylglucosaminyltransferase 2 OS=Mus musculus (Mouse) OX=10090 GN=B3GNT2 PE=1 SV=3	B3GNT2	10.7698	11.3586	10.4214	10.7531	10.6281	10.4446	10.4016	10.7312	11.0147		10.8319	10.0797
P15535	>sp|P15535|B4GT1_MOUSE Beta-1,4-galactosyltransferase 1 OS=Mus musculus (Mouse) OX=10090 GN=B4galt1 PE=1 SV=1	B4GALT1	12.4185	12.7121	12.2375	12.101	11.8495	11.3878	11.4163	11.7521	12.0401	11.2958	11.3904	11.057
Q8BWP8	>sp|Q8BWP8|B4GA1_MOUSE Beta-1,4-glucuronyltransferase 1 OS=Mus musculus (Mouse) OX=10090 GN=B4gat1 PE=1 SV=1	B4GAT1	10.4293	10.3346	10.82		10.2929	10.1841	9.88556	9.42733	10.3377	9.56833	10.3164	9.89137
Q3UI43	>sp|Q3UI43|BABA1_MOUSE BRISC and BRCA1-A complex member 1 OS=Mus musculus (Mouse) OX=10090 GN=Babam1 PE=1 SV=1	BABAM1	10.7948	11.2254	11.2849		10.9051	11.3419	10.6374	11.1059	10.7808	11.4861	9.85714	10.0211
Q8K3W0	>sp|Q8K3W0|BABA2_MOUSE BRISC and BRCA1-A complex member 2 OS=Mus musculus (Mouse) OX=10090 GN=Babam2 PE=1 SV=2	BABAM2	10.0683	10.4187	10.3182	10.1142	10.0566	10.4941	10.9778	10.9272	11.2304	10.8221	10.1764	10.5755
Q60739	>sp|Q60739|BAG1_MOUSE BAG family molecular chaperone regulator 1 OS=Mus musculus (Mouse) OX=10090 GN=Bag1 PE=1 SV=3	BAG1	9.55746	9.95163		10.3226	9.85288	10.3514	10.1349	9.88708	10.3153		10.4549	10.0538
Q91YN9	>sp|Q91YN9|BAG2_MOUSE BAG family molecular chaperone regulator 2 OS=Mus musculus (Mouse) OX=10090 GN=Bag2 PE=1 SV=1	BAG2	11.2266	10.8871	10.2826	10.2283	11.0609	10.5641	10.4275	10.5628	11.1748	10.612	10.4005	9.84814
Q9JLV1	>sp|Q9JLV1|BAG3_MOUSE BAG family molecular chaperone regulator 3 OS=Mus musculus (Mouse) OX=10090 GN=Bag3 PE=1 SV=2	BAG3	11.5238	11.4028	10.8774	11.24	10.9579	11.4342	10.3065	10.5699	10.5848	11.1842	10.7333	10.581
Q8CI32	>sp|Q8CI32|BAG5_MOUSE BAG family molecular chaperone regulator 5 OS=Mus musculus (Mouse) OX=10090 GN=Bag5 PE=1 SV=1	BAG5	10.6428	11.2094	11.126	10.844	10.6557	10.6961	10.9421	10.7621	10.7052	10.4225	9.96862	10.1368
Q9Z1R2	>sp|Q9Z1R2|BAG6_MOUSE Large proline-rich protein BAG6 OS=Mus musculus (Mouse) OX=10090 GN=Bag6 PE=1 SV=1	BAG6	12.1391	12.1491	11.65	11.8693	12.0025	12.3422	12.0514	12.1727	12.078	11.0073	11.7275	11.9022
O08734	>sp|O08734|BAK_MOUSE Bcl-2 homologous antagonist/killer OS=Mus musculus (Mouse) OX=10090 GN=Bak1 PE=1 SV=3	BAK1	11.7579	12.5681	11.79	12.3065	12.5978	11.9222	12.1065	11.9732	12.3106	12.1342	12.4012	12.2246
O54962	>sp|O54962|BAF_MOUSE Barrier-to-autointegration factor OS=Mus musculus (Mouse) OX=10090 GN=Banf1 PE=1 SV=1	BANF1	11.9996	11.8775	12.4686	11.6692	12.1988	12.0348	11.4808	11.97	11.9742	12.1139	12.1484	12.1455
Q07813	>sp|Q07813|BAX_MOUSE Apoptosis regulator BAX OS=Mus musculus (Mouse) OX=10090 GN=Bax PE=1 SV=1	BAX	11.0246	10.98	11.0338	10.885	10.7266	11.0085	10.995	10.9625	10.5831	10.9568	10.7052	10.6906
Q9Z277	>sp|Q9Z277|BAZ1B_MOUSE Tyrosine-protein kinase BAZ1B OS=Mus musculus (Mouse) OX=10090 GN=Baz1b PE=1 SV=2	BAZ1B	11.1345	11.1994	11.6858	10.9692	11.3406	10.9429	10.982	11.073	11.007	11.1006	11.1996	10.9361
Q3V3N7	>sp|Q3V3N7|BBS1_MOUSE Bardet-Biedl syndrome 1 protein homolog OS=Mus musculus (Mouse) OX=10090 GN=Bbs1 PE=1 SV=1	BBS1	12.3086	11.9467	12.2162	11.6005	12.0701	12.4234
Q9R069	>sp|Q9R069|BCAM_MOUSE Basal cell adhesion molecule OS=Mus musculus (Mouse) OX=10090 GN=Bcam PE=1 SV=1	BCAM	11.6997	11.8512	11.9685	12.0743	11.6564	11.8435	11.4041	11.2973	11.0661	11.7737	11.4794	11.0985
Q61334	>sp|Q61334|BAP29_MOUSE B-cell receptor-associated protein 29 OS=Mus musculus (Mouse) OX=10090 GN=Bcap29 PE=1 SV=1	BCAP29	10.4511	10.507	10.446	10.8855	10.5549	10.6084	10.3863	10.5504	10.4736	10.6544	11.0787	10.1723
Q61335	>sp|Q61335|BAP31_MOUSE B-cell receptor-associated protein 31 OS=Mus musculus (Mouse) OX=10090 GN=Bcap31 PE=1 SV=4	BCAP31	11.2054	11.3375	11.7165	11.6514	11.6609	11.611	11.4651	11.1083	11.4492	11.3911	11.5222	11.4492
Q61140	>sp|Q61140|BCAR1_MOUSE Breast cancer anti-estrogen resistance protein 1 OS=Mus musculus (Mouse) OX=10090 GN=Bcar1 PE=1 SV=2	BCAR1							11.2539	11.0263		11.7535	12.5163	11.6721
Q9D287	>sp|Q9D287|SPF27_MOUSE Pre-mRNA-splicing factor SPF27 OS=Mus musculus (Mouse) OX=10090 GN=Bcas2 PE=1 SV=1	BCAS2	10.5534	10.7839		10.5475	9.54411	10.0003	9.96	10.9321	10.3931	10.4975	10.0702	9.88586
Q8CCN5	>sp|Q8CCN5|BCAS3_MOUSE Breast carcinoma-amplified sequence 3 homolog OS=Mus musculus (Mouse) OX=10090 GN=Bcas3 PE=1 SV=2	BCAS3							10.0025	9.87637	9.87202		10.0121	9.43071
O35855	>sp|O35855|BCAT2_MOUSE Branched-chain-amino-acid aminotransferase, mitochondrial OS=Mus musculus (Mouse) OX=10090 GN=Bcat2 PE=1 SV=2	BCAT2	12.4758	12.8504	12.8748	12.8005	13.1008	12.4746	12.84	12.5841	13.1993	12.6255	13.0717	13.1334
Q9CWI3	>sp|Q9CWI3|BCCIP_MOUSE BRCA2 and CDKN1A-interacting protein OS=Mus musculus (Mouse) OX=10090 GN=Bccip PE=1 SV=1	BCCIP	10.6771	10.6171	10.1661	10.9315	9.79989	10.4337	10.8472	10.483	10.1686	10.3753	11.287	10.2908
P50136	>sp|P50136|ODBA_MOUSE 2-oxoisovalerate dehydrogenase subunit alpha, mitochondrial OS=Mus musculus (Mouse) OX=10090 GN=Bckdha PE=1 SV=1	BCKDHA	11.6716	11.7335	12.0184	12.06	11.8203	11.5903	12.0214	11.9088	12.1294	12.0314	12.1651	12.1142
Q6P3A8	>sp|Q6P3A8|ODBB_MOUSE 2-oxoisovalerate dehydrogenase subunit beta, mitochondrial OS=Mus musculus (Mouse) OX=10090 GN=Bckdhb PE=1 SV=2	BCKDHB	11.7452	11.6568	11.829	11.9571	12.3301	12.1065	11.8962	11.9323	12.0999	12.0021	12.0587	11.9899
O55028	>sp|O55028|BCKD_MOUSE [3-methyl-2-oxobutanoate dehydrogenase [lipoamide]] kinase, mitochondrial OS=Mus musculus (Mouse) OX=10090 GN=Bckdk PE=1 SV=1	BCKDK	11.2204	11.5015	11.7294	11.1573	11.5562	11.377	11.7127	11.1496	11.6115	11.358	11.4531	11.4675
Q64373	>sp|Q64373|B2CL1_MOUSE Bcl-2-like protein 1 OS=Mus musculus (Mouse) OX=10090 GN=Bcl2l1 PE=1 SV=1	BCL2L1	11.634	11.2873		10.6029	11.0657	10.8066	10.7096	11.1084	11.1605		10.7628	10.0475
P59017	>sp|P59017|B2L13_MOUSE Bcl-2-like protein 13 OS=Mus musculus (Mouse) OX=10090 GN=Bcl2l13 PE=1 SV=2	BCL2L13	10.4986	10.6833	10.6695	10.9973	10.9477	10.9851	11.1764	11.1005	10.948	11.1198	11.0996	10.9941
Q8K019	>sp|Q8K019|BCLF1_MOUSE Bcl-2-associated transcription factor 1 OS=Mus musculus (Mouse) OX=10090 GN=Bclaf1 PE=1 SV=2	BCLAF1	11.591	11.4643	11.9398	11.8774	11.5718	12.139	12.2072	12.1764	11.7008	11.8849	11.9364	12.1027
Q6PAJ1	>sp|Q6PAJ1|BCR_MOUSE Breakpoint cluster region protein OS=Mus musculus (Mouse) OX=10090 GN=Bcr PE=1 SV=3	BCR	11.0087	11.4319	11.5713	11.5344		11.5489	11.5722	11.4554	11.2606		11.7353	11.4903
Q9CZP5	>sp|Q9CZP5|BCS1_MOUSE Mitochondrial chaperone BCS1 OS=Mus musculus (Mouse) OX=10090 GN=Bcs1l PE=1 SV=1	BCS1L	11.8055	11.9276	12.042	11.8067	12.087	11.4873	11.8964	11.6104	12.1643	11.8783	11.8303	12.0353
O35623	>sp|O35623|BET1_MOUSE BET1 homolog OS=Mus musculus (Mouse) OX=10090 GN=Bet1 PE=1 SV=1	BET1	10.7292	10.8211	10.343	10.3495	10.5458	10.9494	10.8986	10.7136	10.8776	11.382	10.989	10.3853
O35153	>sp|O35153|BET1L_MOUSE BET1-like protein OS=Mus musculus (Mouse) OX=10090 GN=Bet1l PE=3 SV=1	BET1L							11.3946	10.6404	10.9929	11.3022	11.1837	10.817
Q8R079	>sp|Q8R079|BFAR_MOUSE Bifunctional apoptosis regulator OS=Mus musculus (Mouse) OX=10090 GN=Bfar PE=1 SV=1	BFAR	10.6443	10.8822	10.1885		10.7995	10.7913
P28653	>sp|P28653|PGS1_MOUSE Biglycan OS=Mus musculus (Mouse) OX=10090 GN=Bgn PE=1 SV=1	BGN	11.2237	11.7126	11.2256		10.0761	10.4949	10.077	9.26702	10.4037		9.57736	9.86964
Q921C5	>sp|Q921C5|BICD2_MOUSE Protein bicaudal D homolog 2 OS=Mus musculus (Mouse) OX=10090 GN=Bicd2 PE=1 SV=1	BICD2	11.7794	11.6971	10.7186	10.974	11.9844	10.9125	11.685	11.7454	11.4575	11.1071		12.1049
O08539	>sp|O08539|BIN1_MOUSE Myc box-dependent-interacting protein 1 OS=Mus musculus (Mouse) OX=10090 GN=Bin1 PE=1 SV=1	BIN1	11.3791	11.1486	11.3385	10.8338	11.3283	11.4791	10.6275	10.7279	10.3529	11.0105	10.699	10.4308
O88738	>sp|O88738|BIRC6_MOUSE Baculoviral IAP repeat-containing protein 6 OS=Mus musculus (Mouse) OX=10090 GN=Birc6 PE=1 SV=2	BIRC6	9.83064	10.0111	10.0283	9.78143	10.1789	9.4364	9.96319	9.72313	9.92806	10.2951	10.0035	9.93402
Q8VD62	>sp|Q8VD62|CK068_MOUSE UPF0696 protein C11orf68 homolog OS=Mus musculus (Mouse) OX=10090 GN=Bles03 PE=1 SV=2	BLES03	12.5792	12.6619		13.2511	12.5166	13.3008		12.7889	12.1936	13.8697	12.9883	12.2433
Q8R016	>sp|Q8R016|BLMH_MOUSE Bleomycin hydrolase OS=Mus musculus (Mouse) OX=10090 GN=Blmh PE=1 SV=1	BLMH	12.4642	12.8427	11.761	11.9077	11.729	12.1975	12.2406	12.6943	11.9468	11.0479	11.2315	12.1669
Q9R0C0	>sp|Q9R0C0|BL1S6_MOUSE Biogenesis of lysosome-related organelles complex 1 subunit 6 OS=Mus musculus (Mouse) OX=10090 GN=Bloc1s6 PE=1 SV=1	BLOC1S6							11.6836	11.0594	11.043	11.4349	10.7056	11.245
Q9CY64	>sp|Q9CY64|BIEA_MOUSE Biliverdin reductase A OS=Mus musculus (Mouse) OX=10090 GN=Blvra PE=1 SV=1	BLVRA	12.6507	12.5697	12.3028	12.1708	12.133	12.5511	12.6078	12.7077	12.0914	12.1188	11.7263	12.2467
Q923D2	>sp|Q923D2|BLVRB_MOUSE Flavin reductase (NADPH) OS=Mus musculus (Mouse) OX=10090 GN=Blvrb PE=1 SV=3	BLVRB	12.722	12.8869	12.4766	11.8754	11.522	11.3478	11.2212	11.6797	11.1973	11.8744	11.7223	11.6793
O35607	>sp|O35607|BMPR2_MOUSE Bone morphogenetic protein receptor type-2 OS=Mus musculus (Mouse) OX=10090 GN=Bmpr2 PE=1 SV=1	BMPR2	9.6314	9.53531	9.82375	9.71618	9.62627	9.86045
Q6PGF5	>tr|Q6PGF5|Q6PGF5_MOUSE Bms1-type G domain-containing protein OS=Mus musculus (Mouse) OX=10090 GN=Bms1 PE=1 SV=1	BMS1	10.6819	11.037	10.3703		11.0356	10.3742	9.29902	10.4167	10.0473	10.565		10.4821
Q6QD59	>sp|Q6QD59|SEC20_MOUSE Vesicle transport protein SEC20 OS=Mus musculus (Mouse) OX=10090 GN=Bnip1 PE=1 SV=1	BNIP1	11.9265	11.964	12.3131	12.2882	11.9294	12.1279	12.1011	12.1212	12.0685	11.9865	12.0323	12.0602
O55003	>sp|O55003|BNIP3_MOUSE BCL2/adenovirus E1B 19 kDa protein-interacting protein 3 OS=Mus musculus (Mouse) OX=10090 GN=Bnip3 PE=1 SV=1	BNIP3	9.74751	9.51828	10.2304		9.72323	9.83583	10.3163	10.1422	10.0767	10.9536	10.2983	9.61308
Q9Z2F7	>sp|Q9Z2F7|BNI3L_MOUSE BCL2/adenovirus E1B 19 kDa protein-interacting protein 3-like OS=Mus musculus (Mouse) OX=10090 GN=Bnip3l PE=1 SV=1	BNIP3L	10.9511	11.5254	11.4801	10.8676	10.5081	11.6768	11.3153	11.4142	11.783	10.3388	11.3363	10.888
Q9D8S9	>sp|Q9D8S9|BOLA1_MOUSE BolA-like protein 1 OS=Mus musculus (Mouse) OX=10090 GN=Bola1 PE=1 SV=1	BOLA1	10.1313	10.4967	10.6029	9.98704	10.3782	9.66294	10.5533	10.7275	10.2799	11.4725	10.4722	10.1154
P97452	>sp|P97452|BOP1_MOUSE Ribosome biogenesis protein BOP1 OS=Mus musculus (Mouse) OX=10090 GN=Bop1 PE=1 SV=1	BOP1	10.3612	9.98857	10.2823	10.0554	10.3838	10.3291	9.40299	9.54921	9.48708	10.5833	9.28289	9.77602
Q9D920	>sp|Q9D920|BORC5_MOUSE BLOC-1-related complex subunit 5 OS=Mus musculus (Mouse) OX=10090 GN=Borcs5 PE=1 SV=1	BORCS5	11.2794	10.719		9.82283	11.7535	9.96982	11.07	11.5089	11.2868		11.4077	11.3366
P15327	>sp|P15327|PMGE_MOUSE Bisphosphoglycerate mutase OS=Mus musculus (Mouse) OX=10090 GN=Bpgm PE=1 SV=2	BPGM	12.5353	12.9533	11.5921	11.2065	10.8863	10.4784	9.57936	10.2082	9.66696		10.0759	10.598
Q8R164	>sp|Q8R164|BPHL_MOUSE Valacyclovir hydrolase OS=Mus musculus (Mouse) OX=10090 GN=Bphl PE=1 SV=1	BPHL	12.9233	13.1766	13.1984	13.3633	13.4155	12.9875	13.2118	13.089	13.4399	13.1003	13.5697	13.5466
Q9Z0S1	>sp|Q9Z0S1|BPNT1_MOUSE 3'(2'),5'-bisphosphate nucleotidase 1 OS=Mus musculus (Mouse) OX=10090 GN=Bpnt1 PE=1 SV=2	BPNT1	11.3644	11.7309	11.902	11.8906	11.9253	11.9335	11.8453	11.7461	12.152	11.5855	12.001	12.1518
P28028	>sp|P28028|BRAF_MOUSE Serine/threonine-protein kinase B-raf OS=Mus musculus (Mouse) OX=10090 GN=Braf PE=1 SV=3	BRAF	10.8853	9.806		11.4733	10.626	11.6075	10.7929	11.375	11.3044		11.2048	10.0258
E9PZ26	>tr|E9PZ26|E9PZ26_MOUSE Bromodomain-containing 1 OS=Mus musculus (Mouse) OX=10090 GN=Brd1 PE=1 SV=1	BRD1	9.547	10.1866	10.3347		9.49093	9.96508
Q8K2F0	>sp|Q8K2F0|BRD3_MOUSE Bromodomain-containing protein 3 OS=Mus musculus (Mouse) OX=10090 GN=Brd3 PE=1 SV=2	BRD3	9.70098	8.48801	9.96952		10.0123	9.91603	10.5309	10.0493	9.69436	10.2022	10.2085	9.93533
Q8BXV2	>sp|Q8BXV2|BRI3B_MOUSE BRI3-binding protein OS=Mus musculus (Mouse) OX=10090 GN=Bri3bp PE=1 SV=1	BRI3BP	11.5395	11.8807	11.0439	10.811	10.8595	9.90032	11.6997	10.8724	11.7977	10.7331	10.8489	11.392
Q499E0	>sp|Q499E0|BRNP3_MOUSE BMP/retinoic acid-inducible neural-specific protein 3 OS=Mus musculus (Mouse) OX=10090 GN=Brinp3 PE=2 SV=2	BRINP3	12.5158	12.3242	11.2506	12.0468	9.69201	12.2194
Q9DCA5	>sp|Q9DCA5|BRX1_MOUSE Ribosome biogenesis protein BRX1 homolog OS=Mus musculus (Mouse) OX=10090 GN=Brix1 PE=1 SV=3	BRIX1	11.1369	11.4321	11.3185	11.5663	11.2293	11.4462	10.3725	10.7823	10.8356	11.0883	10.8459	10.7279
Q8K2Q7	>sp|Q8K2Q7|BROX_MOUSE BRO1 domain-containing protein BROX OS=Mus musculus (Mouse) OX=10090 GN=Brox PE=1 SV=1	BROX	11.0657	11.4586	10.731	11.2017	10.697	11.4476	10.6892	10.98	10.6625	10.4675	10.3346	10.7679
P18572	>sp|P18572|BASI_MOUSE Basigin OS=Mus musculus (Mouse) OX=10090 GN=Bsg PE=1 SV=2	BSG	12.8263	12.8738	13.3302	12.7215	12.8525	13.085	12.3797	11.9396	12.455	12.7665	12.382	12.2491
Q8R2Q8	>sp|Q8R2Q8|BST2_MOUSE Bone marrow stromal antigen 2 OS=Mus musculus (Mouse) OX=10090 GN=Bst2 PE=1 SV=1	BST2	13.1988	13.3953	13.5571	13.3715	13.3785	13.0673	11.229	10.3086	10.0483	11.7263	11.3343	10.8067
Q8CIF4	>sp|Q8CIF4|BTD_MOUSE Biotinidase OS=Mus musculus (Mouse) OX=10090 GN=Btd PE=1 SV=2	BTD	11.1705	11.3277	11.2241	11.0561	10.9737	10.6695	10.4846	10.2032	11.1252	11.0068	11.084	11.1415
Q64152	>sp|Q64152|BTF3_MOUSE Transcription factor BTF3 OS=Mus musculus (Mouse) OX=10090 GN=Btf3 PE=1 SV=3	BTF3	11.727	11.7587	11.4879	11.7808	11.5268	11.9543
Q9CQH7	>sp|Q9CQH7|BT3L4_MOUSE Transcription factor BTF3 homolog 4 OS=Mus musculus (Mouse) OX=10090 GN=Btf3l4 PE=1 SV=1	BTF3L4							12.657	13.1928	12.4559	13.5757	12.7539	12.5794
Q9WVA3	>sp|Q9WVA3|BUB3_MOUSE Mitotic checkpoint protein BUB3 OS=Mus musculus (Mouse) OX=10090 GN=Bub3 PE=1 SV=2	BUB3	12.9301	12.6445	12.2851	12.7286	12.588	12.976	12.9464	12.9706	12.5922	12.3949	12.4295	12.6065
Q6PGH1	>sp|Q6PGH1|BUD31_MOUSE Protein BUD31 homolog OS=Mus musculus (Mouse) OX=10090 GN=Bud31 PE=1 SV=2	BUD31	11.289	11.2345	11.3705	9.66973	10.2751	10.3421	11.0031	10.0773	11.0603	11.0895	10.6804	10.3699
O54825	>sp|O54825|BYST_MOUSE Bystin OS=Mus musculus (Mouse) OX=10090 GN=Bysl PE=1 SV=3	BYSL	11.0954	11.3298	10.9102	10.5715	10.8411	10.7005	10.2155	10.8337	10.1933	10.5311	10.9405	10.4532
Q9CQC6	>sp|Q9CQC6|BZW1_MOUSE Basic leucine zipper and W2 domain-containing protein 1 OS=Mus musculus (Mouse) OX=10090 GN=Bzw1 PE=1 SV=1	BZW1	11.7386	11.7025	11.9723	11.915	11.7012	12.2822	11.2244	11.4504	11.1489	11.5991	11.4249	11.2822
O35658	>sp|O35658|C1QBP_MOUSE Complement component 1 Q subcomponent-binding protein, mitochondrial OS=Mus musculus (Mouse) OX=10090 GN=C1qbp PE=1 SV=1	C1QBP	13.6529	14.0582	13.8096	13.5056	13.9421	13.3113	13.5756	13.3456	14.1404	13.3139	13.432	13.8557
Q3UZ09	>sp|Q3UZ09|C1RL_MOUSE Complement C1r subcomponent-like protein OS=Mus musculus (Mouse) OX=10090 GN=C1rl PE=1 SV=1	C1RL							10.704	10.295	10.7108		10.519	11.512
P21180	>sp|P21180|CO2_MOUSE Complement C2 OS=Mus musculus (Mouse) OX=10090 GN=C2 PE=1 SV=2	C2	9.77937	9.7792	9.89398	9.69614	10.455
P01027	>sp|P01027|CO3_MOUSE Complement C3 OS=Mus musculus (Mouse) OX=10090 GN=C3 PE=1 SV=3	C3	13.068	12.5046	12.1803	12.4933	12.2703	12.0855	11.4496	11.2217	11.9378	11.3718	11.8551	11.5537
P01029	>sp|P01029|CO4B_MOUSE Complement C4-B OS=Mus musculus (Mouse) OX=10090 GN=C4b PE=1 SV=3	C4B	13.5223	13.0787	12.3514	12.7934	13.3243	13.0646	12.7264	12.5361	12.4679	12.565	13.1098	12.9316
P13634	>sp|P13634|CAH1_MOUSE Carbonic anhydrase 1 OS=Mus musculus (Mouse) OX=10090 GN=Ca1 PE=1 SV=4	CA1	14.0782	14.3265	12.5089	10.8259	11.7035		10.0118	11.1479	9.58036	10.5113	11.2918	11.6405
P00920	>sp|P00920|CAH2_MOUSE Carbonic anhydrase 2 OS=Mus musculus (Mouse) OX=10090 GN=Ca2 PE=1 SV=4	CA2	14.5735	14.7588	14.3696	13.3291	13.0712	12.948	12.5524	12.9779	12.252	12.533	13.0176	13.0579
P16015	>sp|P16015|CAH3_MOUSE Carbonic anhydrase 3 OS=Mus musculus (Mouse) OX=10090 GN=Ca3 PE=1 SV=3	CA3	10.8735	9.45675	11.2134	10.2494	9.57681	10.0516
Q06138	>sp|Q06138|CAB39_MOUSE Calcium-binding protein 39 OS=Mus musculus (Mouse) OX=10090 GN=Cab39 PE=1 SV=2	CAB39	11.2292	11.4053	11.4636	11.1271	11.1709	11.5227	11.1739	11.3863	11.2095	11.145	10.7638	11.224
Q99246	>sp|Q99246|CAC1D_MOUSE Voltage-dependent L-type calcium channel subunit alpha-1D OS=Mus musculus (Mouse) OX=10090 GN=Cacna1d PE=1 SV=3	CACNA1D							11.0775	10.6515	11.0272	10.5604	11.5278	10.1733
O08532	>sp|O08532|CA2D1_MOUSE Voltage-dependent calcium channel subunit alpha-2/delta-1 OS=Mus musculus (Mouse) OX=10090 GN=Cacna2d1 PE=1 SV=1	CACNA2D1	12.1368	12.307	11.9765	11.8311	11.899	12.0818	12.3153	12.1362	12.1186	11.9498	11.8354	12.1342
Q8CC27	>sp|Q8CC27|CACB2_MOUSE Voltage-dependent L-type calcium channel subunit beta-2 OS=Mus musculus (Mouse) OX=10090 GN=Cacnb2 PE=1 SV=1	CACNB2	9.41144	10.0699	10.6908	10.902	10.1747	10.726	10.0136	9.77822	9.82323		10.5707	10.2036
Q9CXW3	>sp|Q9CXW3|CYBP_MOUSE Calcyclin-binding protein OS=Mus musculus (Mouse) OX=10090 GN=Cacybp PE=1 SV=1	CACYBP	11.2082	10.9708	11.1163	10.7171	11.0946	11.1383	11.1876	11.0539	11.3117	10.9759	11.1305	11.1168
B2RQC6	>sp|B2RQC6|PYR1_MOUSE CAD protein OS=Mus musculus (Mouse) OX=10090 GN=Cad PE=1 SV=1	CAD	10.6697	10.8118	10.7581	10.7515	10.6822	10.7758	10.5214	10.5478	10.4434	10.3885	10.6601	10.4816
Q8CGU1	>sp|Q8CGU1|CACO1_MOUSE Calcium-binding and coiled-coil domain-containing protein 1 OS=Mus musculus (Mouse) OX=10090 GN=Calcoco1 PE=1 SV=2	CALCOCO1	10.4819	10.2625	11.1088		10.3897	10.1769	10.0896	10.6268	9.93969	11.3461	10.1297	10.4329
E9QA15	>tr|E9QA15|E9QA15_MOUSE Caldesmon 1 OS=Mus musculus (Mouse) OX=10090 GN=Cald1 PE=1 SV=1	CALD1	11.8314	11.438	11.0939	10.5282	11.0416	11.1462	10.5165	10.4459	9.96993	10.5454	10.6266	10.2083
P0DP26;P0DP27;P0DP28	>sp|P0DP26|CALM1_MOUSE Calmodulin-1 OS=Mus musculus (Mouse) OX=10090 GN=Calm1 PE=1 SV=1;>sp|P0DP27|CALM2_MOUSE Calmodulin-2 OS=Mus musculus (Mouse) OX=10090 GN=Calm2 PE=1 SV=1;>sp|P0DP28|CALM3_MOUSE Calmodulin-3 OS=Mus musculus (Mouse) OX=10090 GN=Calm3 PE=1 SV=1	CALM1;CALM2;CALM3	13.2257	12.9152	13.4306	13.3385	13.2645	13.3209	12.9215	13.1402	13.3178	13.7481	13.6499	13.5877
P14211	>sp|P14211|CALR_MOUSE Calreticulin OS=Mus musculus (Mouse) OX=10090 GN=Calr PE=1 SV=1	CALR	14.0764	14.2093	14.5781	14.431	14.3241	14.2427	13.8075	13.7153	13.7415	14.1142	14.0942	13.88
O35887	>sp|O35887|CALU_MOUSE Calumenin OS=Mus musculus (Mouse) OX=10090 GN=Calu PE=1 SV=1	CALU	11.7355	11.9188	11.8662	12.0753	12.0777	12.015	11.3174	11.2944	11.4801	11.6659	11.6243	11.598
Q91YS8	>sp|Q91YS8|KCC1A_MOUSE Calcium/calmodulin-dependent protein kinase type 1 OS=Mus musculus (Mouse) OX=10090 GN=Camk1 PE=1 SV=1	CAMK1	10.0137		10.6464	11.4916	10.5259	10.6985	10.5008	10.1333	10.4374	11.3066	10.4971	10.2882
Q6PHZ2	>sp|Q6PHZ2|KCC2D_MOUSE Calcium/calmodulin-dependent protein kinase type II subunit delta OS=Mus musculus (Mouse) OX=10090 GN=Camk2d PE=1 SV=1	CAMK2D	12.1406	11.782	12.0549	11.8584	11.8009	12.0814	12.1016	11.9138	11.6181	11.6867	11.6081	11.5986
Q6PHZ2;Q923T9	>sp|Q6PHZ2|KCC2D_MOUSE Calcium/calmodulin-dependent protein kinase type II subunit delta OS=Mus musculus (Mouse) OX=10090 GN=Camk2d PE=1 SV=1;>sp|Q923T9|KCC2G_MOUSE Calcium/calmodulin-dependent protein kinase type II subunit gamma OS=Mus musculus (Mouse) OX=10090 GN=Camk2g PE=1 SV=1	CAMK2D;CAMK2G	12.3552	12.5808	11.9499	11.7349	11.4635	12.2107	12.4555	12.3905	11.8596	11.7749	11.9753	11.8614
Q923T9	>sp|Q923T9|KCC2G_MOUSE Calcium/calmodulin-dependent protein kinase type II subunit gamma OS=Mus musculus (Mouse) OX=10090 GN=Camk2g PE=1 SV=1	CAMK2G	11.2337	10.9693	10.3518	10.0051	10.1682	10.9526	10.6227	11.0747	10.9582	10.4026	10.7246	10.567
A2A891	>sp|A2A891|CMTA1_MOUSE Calmodulin-binding transcription activator 1 OS=Mus musculus (Mouse) OX=10090 GN=Camta1 PE=2 SV=1	CAMTA1	12.1631	12.4226	12.4646	12.706	12.8622	12.0295	12.4561	12.3954	12.7967	13.0678	13.1884	12.8983
Q6ZQ38	>sp|Q6ZQ38|CAND1_MOUSE Cullin-associated NEDD8-dissociated protein 1 OS=Mus musculus (Mouse) OX=10090 GN=Cand1 PE=1 SV=2	CAND1	12.3733	12.1845	12.2817	12.3177	12.1958	12.4848	12.2659	12.4293	12.0159	12.0867	12.0272	12.0639
Q6ZQ73	>sp|Q6ZQ73|CAND2_MOUSE Cullin-associated NEDD8-dissociated protein 2 OS=Mus musculus (Mouse) OX=10090 GN=Cand2 PE=1 SV=2	CAND2	11.8301	11.8933	11.3698	12.0362		11.0491
P35564	>sp|P35564|CALX_MOUSE Calnexin OS=Mus musculus (Mouse) OX=10090 GN=Canx PE=1 SV=1	CANX	12.6982	13.1534	13.0546	13.1521	13.2469	13.0639	12.8222	12.4038	12.7838	12.6424	12.724	12.8647
P40124	>sp|P40124|CAP1_MOUSE Adenylyl cyclase-associated protein 1 OS=Mus musculus (Mouse) OX=10090 GN=Cap1 PE=1 SV=4	CAP1	12.3725	12.238	12.1069	12.3712	12.2751	12.3723	12.1883	12.4064	11.9711	11.4579	11.8906	12.1699
P24452	>sp|P24452|CAPG_MOUSE Macrophage-capping protein OS=Mus musculus (Mouse) OX=10090 GN=Capg PE=1 SV=2	CAPG	12.7813	12.7507	12.654	12.4707	12.4174	12.8711	12.9193	13.1317	12.6938	12.2928	12.5661	12.6894
O35350	>sp|O35350|CAN1_MOUSE Calpain-1 catalytic subunit OS=Mus musculus (Mouse) OX=10090 GN=Capn1 PE=1 SV=1	CAPN1	11.2973	11.4651	11.3541	11.0071	11.2022	11.3608	11.2204	11.3553	11.057	11.0945	11.0367	11.1228
O08529	>sp|O08529|CAN2_MOUSE Calpain-2 catalytic subunit OS=Mus musculus (Mouse) OX=10090 GN=Capn2 PE=1 SV=4	CAPN2	11.3103	11.3588	11.2858	11.5547	11.07	11.3819	10.9796	11.0249	10.795	10.6099	10.8846	11.1341
O88456	>sp|O88456|CPNS1_MOUSE Calpain small subunit 1 OS=Mus musculus (Mouse) OX=10090 GN=Capns1 PE=1 SV=1	CAPNS1	11.8474	11.6558	11.637	11.5346	11.4147	11.5764	11.3122	10.9021	11.1295	11.113	11.0021	11.2741
Q60865	>sp|Q60865|CAPR1_MOUSE Caprin-1 OS=Mus musculus (Mouse) OX=10090 GN=Caprin1 PE=1 SV=2	CAPRIN1	12.2837	12.152	12.3025	12.512	11.9256	12.6717	12.2538	12.4344	12.0164	12.3027	11.9267	12.0797
P47753	>sp|P47753|CAZA1_MOUSE F-actin-capping protein subunit alpha-1 OS=Mus musculus (Mouse) OX=10090 GN=Capza1 PE=1 SV=4	CAPZA1	12.1478	12.0346	11.6589	11.7723	12.0003	12.0435	11.8439	11.8887	11.774	11.2259	11.3924	11.4563
P47753;P47754	>sp|P47753|CAZA1_MOUSE F-actin-capping protein subunit alpha-1 OS=Mus musculus (Mouse) OX=10090 GN=Capza1 PE=1 SV=4;>sp|P47754|CAZA2_MOUSE F-actin-capping protein subunit alpha-2 OS=Mus musculus (Mouse) OX=10090 GN=Capza2 PE=1 SV=3	CAPZA1;CAPZA2	13.7013	13.8164	13.3383	13.1088	13.6164	13.8863	13.4983	13.5642	13.1858	13.5528	13.1625	13.091
P47754	>sp|P47754|CAZA2_MOUSE F-actin-capping protein subunit alpha-2 OS=Mus musculus (Mouse) OX=10090 GN=Capza2 PE=1 SV=3	CAPZA2	12.5322	12.4664	12.196	11.96	12.0133	12.3141	12.2122	12.3293	12.0099	11.7301	11.7268	12.0542
P47757	>sp|P47757|CAPZB_MOUSE F-actin-capping protein subunit beta OS=Mus musculus (Mouse) OX=10090 GN=Capzb PE=1 SV=3	CAPZB	12.6679	12.5306	12.816	12.3557	12.7085	12.8925	12.4605	12.3868	12.2835	12.5336	12.3961	12.3342
Q9D1I2	>sp|Q9D1I2|CAR19_MOUSE Caspase recruitment domain-containing protein 19 OS=Mus musculus (Mouse) OX=10090 GN=Card19 PE=1 SV=1	CARD19	11.7962	12.1451	11.6307	11.5349	11.9015	11.9685	11.7588	11.7141	12.3226	12.3461	12.2217	12.0845
Q9CR86	>sp|Q9CR86|CHSP1_MOUSE Calcium-regulated heat stable protein 1 OS=Mus musculus (Mouse) OX=10090 GN=Carhsp1 PE=1 SV=1	CARHSP1	10.7414	10.4446	10.8304		9.99443	10.9917	9.97222	9.52298	9.17349	10.5975	9.59732	10.1819
Q6EDY6	>sp|Q6EDY6|CARL1_MOUSE F-actin-uncapping protein LRRC16A OS=Mus musculus (Mouse) OX=10090 GN=Carmil1 PE=1 SV=2	CARMIL1	9.89114	10.2149	10.3778	10.4737	10.2252	10.3741	10.3734	10.4758	10.545	10.2769	10.6424	10.3379
Q3V3V9	>sp|Q3V3V9|CARL2_MOUSE Capping protein, Arp2/3 and myosin-I linker protein 2 OS=Mus musculus (Mouse) OX=10090 GN=Carmil2 PE=1 SV=2	CARMIL2	10.2038	10.9013	10.1801	10.7496		10.9667	10.5085	9.79043	10.2522	11.1449		11.1107
Q80UY1	>sp|Q80UY1|CARME_MOUSE Carnosine N-methyltransferase OS=Mus musculus (Mouse) OX=10090 GN=Carnmt1 PE=1 SV=1	CARNMT1	11.2311	11.0281	11.4417		10.99	10.916	10.864	10.8786	10.9484	10.8012		10.8012
Q9ER72	>sp|Q9ER72|SYCC_MOUSE Cysteine--tRNA ligase, cytoplasmic OS=Mus musculus (Mouse) OX=10090 GN=Cars PE=1 SV=2	CARS	11.8418	11.5123	11.485	11.2253	11.3574	11.6903	11.1818	11.5793	10.9512	10.6629	10.9076	11.0042
Q8BYM8	>sp|Q8BYM8|SYCM_MOUSE Probable cysteine--tRNA ligase, mitochondrial OS=Mus musculus (Mouse) OX=10090 GN=Cars2 PE=1 SV=2	CARS2	10.4562	10.5827	10.9455	11.3274	10.7955	10.7253	11.0211	10.43	11.1316	11.3987	11.1123	11.1881
Q6P2L7	>sp|Q6P2L7|CASC4_MOUSE Protein CASC4 OS=Mus musculus (Mouse) OX=10090 GN=Casc4 PE=1 SV=1	CASC4	11.1986	11.3092	11.5974	11.6755	11.1126	11.0089	11.1601	11.0437	10.9779	10.9837	11.6191	10.9504
O70589	>sp|O70589|CSKP_MOUSE Peripheral plasma membrane protein CASK OS=Mus musculus (Mouse) OX=10090 GN=Cask PE=1 SV=2	CASK	10.8327	11.1759	10.8075	11.312	10.578	11.1237	10.703	10.4148	10.7374	10.8206	10.8259	10.6501
O08736	>sp|O08736|CASPC_MOUSE Caspase-12 OS=Mus musculus (Mouse) OX=10090 GN=Casp12 PE=1 SV=1	CASP12	10.6381	10.2812	10.5074	10.3222	9.88132	10.6791
P70677	>sp|P70677|CASP3_MOUSE Caspase-3 OS=Mus musculus (Mouse) OX=10090 GN=Casp3 PE=1 SV=1	CASP3	11.2546	10.8931	11.4628	11.2539	11.6031	11.9015
O08738	>sp|O08738|CASP6_MOUSE Caspase-6 OS=Mus musculus (Mouse) OX=10090 GN=Casp6 PE=1 SV=1	CASP6	11.1148	11.1198	10.6922	10.8325	10.9841	10.654	11.0788	11.5696	10.7561	9.96082	11.097	11.1994
O89110	>sp|O89110|CASP8_MOUSE Caspase-8 OS=Mus musculus (Mouse) OX=10090 GN=Casp8 PE=1 SV=1	CASP8	11.2818	10.5879		10.9379	10.6648	10.9794
P51125	>sp|P51125|ICAL_MOUSE Calpastatin OS=Mus musculus (Mouse) OX=10090 GN=Cast PE=1 SV=2	CAST	12.5652	12.2075		10.6933	11.5015	10.0199	9.86572	9.82531	9.58085	10.7613	10.3959	10.0499
P24270	>sp|P24270|CATA_MOUSE Catalase OS=Mus musculus (Mouse) OX=10090 GN=Cat PE=1 SV=4	CAT	13.1017	13.1244	13.5019	13.4297	13.4936	13.1272	12.8468	12.6182	13.1214	13.1416	12.9451	13.0212
P49817	>sp|P49817|CAV1_MOUSE Caveolin-1 OS=Mus musculus (Mouse) OX=10090 GN=Cav1 PE=1 SV=1	CAV1	11.6569	11.5523	11.4427	10.8601	11.4862	11.0212	10.4962	10.8992	10.2479	11.2921	10.8712	10.6676
O54724	>sp|O54724|CAVN1_MOUSE Caveolae-associated protein 1 OS=Mus musculus (Mouse) OX=10090 GN=Cavin1 PE=1 SV=1	CAVIN1	11.7585	11.8266	11.5541	11.0825	11.4813	11.1627	10.532	10.9975	10.2388	10.6567	10.7756	10.4855
Q63918	>sp|Q63918|CAVN2_MOUSE Caveolae-associated protein 2 OS=Mus musculus (Mouse) OX=10090 GN=Cavin2 PE=1 SV=3	CAVIN2	10.2478	9.96385	10.4446	9.89822	10.237	10.3205	9.5763	9.1918		10.422	10.4113	9.05873
Q08024	>sp|Q08024|PEBB_MOUSE Core-binding factor subunit beta OS=Mus musculus (Mouse) OX=10090 GN=Cbfb PE=1 SV=1	CBFB	10.8994	10.9889	11.3133		11.3063	10.3871	11.0871	11.0803	11.1837	11.0746	11.5249	10.8748
P48758	>sp|P48758|CBR1_MOUSE Carbonyl reductase [NADPH] 1 OS=Mus musculus (Mouse) OX=10090 GN=Cbr1 PE=1 SV=3	CBR1	11.9336	11.9439	12.2676	12.4607	12.0516	12.1368	12.3162	12.2069	12.1147	12.256	12.3245	12.1847
P48758;Q8K354	>sp|P48758|CBR1_MOUSE Carbonyl reductase [NADPH] 1 OS=Mus musculus (Mouse) OX=10090 GN=Cbr1 PE=1 SV=3;>sp|Q8K354|CBR3_MOUSE Carbonyl reductase [NADPH] 3 OS=Mus musculus (Mouse) OX=10090 GN=Cbr3 PE=1 SV=1	CBR1;CBR3	14.1908	13.2026	14.783	14.3298	14.4292	14.9788	12.995	14.5007	14.2752	15.0421	14.6807	14.4877
Q8K354	>sp|Q8K354|CBR3_MOUSE Carbonyl reductase [NADPH] 3 OS=Mus musculus (Mouse) OX=10090 GN=Cbr3 PE=1 SV=1	CBR3	11.6673	11.1914	11.6698	12.0165	11.6807	11.9975	11.5057	11.6256	11.6426	11.7135	11.9855	11.8425
Q91VT4	>sp|Q91VT4|CBR4_MOUSE Carbonyl reductase family member 4 OS=Mus musculus (Mouse) OX=10090 GN=Cbr4 PE=1 SV=2	CBR4	12.9102	13.1521	13.4759	13.273	13.2531	12.6112	13.2118	13.0201	13.6082	13.4386	13.3655	13.4147
P83917	>sp|P83917|CBX1_MOUSE Chromobox protein homolog 1 OS=Mus musculus (Mouse) OX=10090 GN=Cbx1 PE=1 SV=1	CBX1	11.472	11.5619	11.7694	11.1551	10.6426	11.4645	11.3681	11.8672	11.3565	11.0181	11.0558	11.2809
P23198	>sp|P23198|CBX3_MOUSE Chromobox protein homolog 3 OS=Mus musculus (Mouse) OX=10090 GN=Cbx3 PE=1 SV=2	CBX3	12.7096	12.346	12.5955	13.0334	12.5736	12.9378	12.745	12.7062	12.5001	13.0768	12.8189	12.6614
P23198;P83917	>sp|P23198|CBX3_MOUSE Chromobox protein homolog 3 OS=Mus musculus (Mouse) OX=10090 GN=Cbx3 PE=1 SV=2;>sp|P83917|CBX1_MOUSE Chromobox protein homolog 1 OS=Mus musculus (Mouse) OX=10090 GN=Cbx1 PE=1 SV=1	CBX3;CBX1	10.324	10.8103	9.88632	10.1825	10.3794	10.4237	10.0506	10.6593	10.0018	9.90387	10.9693	10.0813
P23198;Q61686	>sp|P23198|CBX3_MOUSE Chromobox protein homolog 3 OS=Mus musculus (Mouse) OX=10090 GN=Cbx3 PE=1 SV=2;>sp|Q61686|CBX5_MOUSE Chromobox protein homolog 5 OS=Mus musculus (Mouse) OX=10090 GN=Cbx5 PE=1 SV=1	CBX3;CBX5	12.2203	12.6247	12.0651		11.9789	10.8076	12.0387	12.7385	12.0274		11.8643	11.5334
Q61686	>sp|Q61686|CBX5_MOUSE Chromobox protein homolog 5 OS=Mus musculus (Mouse) OX=10090 GN=Cbx5 PE=1 SV=1	CBX5	11.3866	11.1132	11.0099	12.3905		12.5402	11.8881	12.0302	11.318	12.3756	12.0202	11.5871
Q8K1A6	>sp|Q8K1A6|C2D1A_MOUSE Coiled-coil and C2 domain-containing protein 1A OS=Mus musculus (Mouse) OX=10090 GN=Cc2d1a PE=1 SV=2	CC2D1A	9.28023	9.21329		10.2217	9.36029	9.60401
Q8BRN9	>sp|Q8BRN9|C2D1B_MOUSE Coiled-coil and C2 domain-containing protein 1B OS=Mus musculus (Mouse) OX=10090 GN=Cc2d1b PE=1 SV=1	CC2D1B	11.0076	10.7579	11.3503	10.1864	10.1466	10.9897	11.0962	11.0497	11.1412	11.5081	10.758	11.1375
Q8CH18	>sp|Q8CH18|CCAR1_MOUSE Cell division cycle and apoptosis regulator protein 1 OS=Mus musculus (Mouse) OX=10090 GN=Ccar1 PE=1 SV=1	CCAR1	10.9532	10.453	10.8973	11.1995	11.1065	11.0761	11.1214	11.1051	10.4849	10.4217	11.2888	10.8946
Q8VDP4	>sp|Q8VDP4|CCAR2_MOUSE Cell cycle and apoptosis regulator protein 2 OS=Mus musculus (Mouse) OX=10090 GN=Ccar2 PE=1 SV=2	CCAR2	11.6501	11.5804	11.7684	12.1205	11.7586	12.0308	12.0687	12.0288	11.8104	11.9045	11.8271	11.8695
Q3TC33	>sp|Q3TC33|CC127_MOUSE Coiled-coil domain-containing protein 127 OS=Mus musculus (Mouse) OX=10090 GN=Ccdc127 PE=1 SV=2	CCDC127	11.9611	12.3761	12.1016	12.009	12.5625	11.6155	12.1197	11.9329	12.4032	12.5497	11.8208	12.3292
Q8C7V8	>sp|Q8C7V8|CC134_MOUSE Coiled-coil domain-containing protein 134 OS=Mus musculus (Mouse) OX=10090 GN=Ccdc134 PE=1 SV=1	CCDC134	10.4372	11.5392	11.1662	10.2838	11.0936	9.73809	11.0155	10.9803	11.2256	10.6713	10.935	10.8709
Q3UYG1	>sp|Q3UYG1|CC160_MOUSE Coiled-coil domain-containing protein 160 OS=Mus musculus (Mouse) OX=10090 GN=Ccdc160 PE=2 SV=1	CCDC160	10.1348	9.69664	9.96014	10.6084	10.1227	10.5963	9.57719	9.97201	9.08037		9.95312	10.7488
Q9JIG7	>sp|Q9JIG7|CCD22_MOUSE Coiled-coil domain-containing protein 22 OS=Mus musculus (Mouse) OX=10090 GN=Ccdc22 PE=1 SV=1	CCDC22	10.8028	10.9848	10.952	11.2054	10.8396	11.0876	10.8792	10.7157	10.4961	11.2117	11.1098	10.8073
Q9CR29	>sp|Q9CR29|CCD43_MOUSE Coiled-coil domain-containing protein 43 OS=Mus musculus (Mouse) OX=10090 GN=Ccdc43 PE=1 SV=1	CCDC43							9.23333	9.50571	9.18543	9.56833		8.85448
Q9D024	>sp|Q9D024|CCD47_MOUSE Coiled-coil domain-containing protein 47 OS=Mus musculus (Mouse) OX=10090 GN=Ccdc47 PE=1 SV=2	CCDC47	11.3091	11.3404	11.251	10.954	11.3923	11.1822	11.1702	11.1104	11.2871	10.7508	11.2799	11.1337
Q3URS9	>sp|Q3URS9|MITOK_MOUSE Mitochondrial potassium channel OS=Mus musculus (Mouse) OX=10090 GN=Ccdc51 PE=1 SV=1	CCDC51	11.4625	11.8231	11.6822	11.6051	11.8274	11.4231	11.637	11.4422	12.0159	11.7773	11.7606	11.8676
Q8R3Q6	>sp|Q8R3Q6|CCD58_MOUSE Coiled-coil domain-containing protein 58 OS=Mus musculus (Mouse) OX=10090 GN=Ccdc58 PE=1 SV=1	CCDC58	11.3673	11.4109	11.9937	11.6449	11.9222	11.6723	11.5325	11.6537	12.1034	12.5794	12.2863	12.0029
D3YZP9	>sp|D3YZP9|CCDC6_MOUSE Coiled-coil domain-containing protein 6 OS=Mus musculus (Mouse) OX=10090 GN=Ccdc6 PE=1 SV=1	CCDC6	9.7214	10.3944	10.5808		10.2745	9.47832	10.5793	9.94151	9.75583		10.5915	9.72668
Q6PG04	>sp|Q6PG04|CCD82_MOUSE Coiled-coil domain-containing protein 82 OS=Mus musculus (Mouse) OX=10090 GN=Ccdc82 PE=2 SV=1	CCDC82	9.25419	9.60902	10.2919	11.3852	10.3936	10.6002	9.26882	9.50038	9.65736		10.0362	9.22896
Q8C3X2	>sp|Q8C3X2|CC90B_MOUSE Coiled-coil domain-containing protein 90B, mitochondrial OS=Mus musculus (Mouse) OX=10090 GN=Ccdc90b PE=1 SV=1	CCDC90B	11.5245	11.8438	12.4909	12.4685	12.2913	11.6747	12.0271	11.8291	12.304	12.6684	12.4611	12.2566
Q7TQK5	>sp|Q7TQK5|CCD93_MOUSE Coiled-coil domain-containing protein 93 OS=Mus musculus (Mouse) OX=10090 GN=Ccdc93 PE=1 SV=1	CCDC93	9.4289		10.6733	10.5782	10.4497	11.093	10.3136	10.5166	10.2925	10.6456	10.7857	10.0075
Q8BGU5	>sp|Q8BGU5|CCNY_MOUSE Cyclin-Y OS=Mus musculus (Mouse) OX=10090 GN=Ccny PE=1 SV=1	CCNY	10.3495	10.3102	10.7328	10.7643	9.88219	10.2564	10.5262	10.7295	10.1267	9.52613	10.8118	9.5632
Q640L3	>sp|Q640L3|CCPG1_MOUSE Cell cycle progression protein 1 OS=Mus musculus (Mouse) OX=10090 GN=Ccpg1 PE=1 SV=2	CCPG1	10.937	10.8394		11.5019	11.1101	11.0688	11.1428	11.2394	11.7349		11.6754	11.1542
Q9WU84	>sp|Q9WU84|CCS_MOUSE Copper chaperone for superoxide dismutase OS=Mus musculus (Mouse) OX=10090 GN=Ccs PE=1 SV=1	CCS	13.1164	12.7678	13.4012	13.5892	13.1341	12.4655	12.733	13.1376	13.0152	13.4285	13.4894	13.3457
Q6RUT7	>sp|Q6RUT7|CSMT1_MOUSE Protein CCSMST1 OS=Mus musculus (Mouse) OX=10090 GN=Ccsmst1 PE=1 SV=1	CCSMST1							9.01556	8.51439	9.40757		9.63252	9.23212
P80314	>sp|P80314|TCPB_MOUSE T-complex protein 1 subunit beta OS=Mus musculus (Mouse) OX=10090 GN=Cct2 PE=1 SV=4	CCT2	12.2758	12.0906	12.0897	12.1864	12.0666	12.4915	12.124	12.2382	11.9165	11.9789	11.8959	12.0591
P80318	>sp|P80318|TCPG_MOUSE T-complex protein 1 subunit gamma OS=Mus musculus (Mouse) OX=10090 GN=Cct3 PE=1 SV=1	CCT3	12.2901	11.9775	11.9032	12.0135	11.9813	12.4178	12.1148	12.328	12.0252	11.8077	11.6418	11.9704
P80315	>sp|P80315|TCPD_MOUSE T-complex protein 1 subunit delta OS=Mus musculus (Mouse) OX=10090 GN=Cct4 PE=1 SV=3	CCT4	11.9445	11.7852	12.2049	11.9583	12.0173	12.3809	11.7042	11.7756	11.6369	11.9311	11.7044	11.7055
P80316	>sp|P80316|TCPE_MOUSE T-complex protein 1 subunit epsilon OS=Mus musculus (Mouse) OX=10090 GN=Cct5 PE=1 SV=1	CCT5	12.5441	12.115	12.4967	12.329	12.1926	12.7303	12.3596	12.4946	12.2881	12.0938	12.0763	12.2129
P80317	>sp|P80317|TCPZ_MOUSE T-complex protein 1 subunit zeta OS=Mus musculus (Mouse) OX=10090 GN=Cct6a PE=1 SV=3	CCT6A	13.6233	13.2756	13.5097	13.5669	13.2886	13.8063	13.2687	13.5764	13.3135	13.2112	13.1804	13.207
P80317;Q61390	>sp|P80317|TCPZ_MOUSE T-complex protein 1 subunit zeta OS=Mus musculus (Mouse) OX=10090 GN=Cct6a PE=1 SV=3;>sp|Q61390|TCPW_MOUSE T-complex protein 1 subunit zeta-2 OS=Mus musculus (Mouse) OX=10090 GN=Cct6b PE=1 SV=4	CCT6A;CCT6B	12.5671	12.0029	12.9919	12.9877	12.5509	12.9974	12.0896	12.4094	12.0847	12.8927	12.0692	12.1141
Q61390	>sp|Q61390|TCPW_MOUSE T-complex protein 1 subunit zeta-2 OS=Mus musculus (Mouse) OX=10090 GN=Cct6b PE=1 SV=4	CCT6B	10.6493	11.0368	9.58762	10.4072	10.3953	10.1164	10.6253	11.1556	10.8781	9.98643		10.069
P80313	>sp|P80313|TCPH_MOUSE T-complex protein 1 subunit eta OS=Mus musculus (Mouse) OX=10090 GN=Cct7 PE=1 SV=1	CCT7	12.1125	11.9535	12.2201	11.9049	12.0785	12.1893	12.0408	12.1872	11.6259	11.9345	11.7182	11.8936
P42932	>sp|P42932|TCPQ_MOUSE T-complex protein 1 subunit theta OS=Mus musculus (Mouse) OX=10090 GN=Cct8 PE=1 SV=3	CCT8	12.9376	12.5225	12.903	12.7639	12.7719	13.2027	12.738	12.8866	12.5844	12.822	12.3923	12.6067
O35566	>sp|O35566|CD151_MOUSE CD151 antigen OS=Mus musculus (Mouse) OX=10090 GN=Cd151 PE=1 SV=2	CD151	12.6543	12.9165	13.0386	11.3068	13.2622	13.2617	12.4477	12.1107	12.5541	13.4457	13.4259	12.7352
Q9JLQ0	>sp|Q9JLQ0|CD2AP_MOUSE CD2-associated protein OS=Mus musculus (Mouse) OX=10090 GN=Cd2ap PE=1 SV=3	CD2AP	10.8927	10.7891	10.5375	10.7583	10.6396	10.9441	10.6908	10.6705	10.7382	10.507	10.671	10.5804
Q9CWK3	>sp|Q9CWK3|CD2B2_MOUSE CD2 antigen cytoplasmic tail-binding protein 2 OS=Mus musculus (Mouse) OX=10090 GN=Cd2bp2 PE=1 SV=1	CD2BP2	11.1031	10.8185	10.0588	10.5102	10.8793	11.3654	11.0799	11.2758	11.2223		10.8183	10.7798
Q08857	>sp|Q08857|CD36_MOUSE Platelet glycoprotein 4 OS=Mus musculus (Mouse) OX=10090 GN=Cd36 PE=1 SV=2	CD36	12.1019	12.0808	12.5023	12.3551	12.0898	12.1536	11.9979	11.1925	12.6466	12.6892	11.9428	12.0274
Q61735	>sp|Q61735|CD47_MOUSE Leukocyte surface antigen CD47 OS=Mus musculus (Mouse) OX=10090 GN=Cd47 PE=1 SV=2	CD47	11.95	11.821	11.9353	11.6765	11.7366	11.5108	10.6844	10.9442	10.9349	10.5182	11.2486	11.2372
O55186	>sp|O55186|CD59A_MOUSE CD59A glycoprotein OS=Mus musculus (Mouse) OX=10090 GN=Cd59a PE=2 SV=1	CD59A	10.914	12.2773		10.6316	11.0603	10.6737	11.9011	10.9849	12.022	11.0066	10.5767	11.6062
P41731	>sp|P41731|CD63_MOUSE CD63 antigen OS=Mus musculus (Mouse) OX=10090 GN=Cd63 PE=1 SV=2	CD63	10.0037	10.7281		10.01	10.9848	11.3849
P31996	>sp|P31996|CD68_MOUSE Macrosialin OS=Mus musculus (Mouse) OX=10090 GN=Cd68 PE=1 SV=1	CD68	11.7715	12.0565	11.8249	12.3094	12.0559	12.519
P35762	>sp|P35762|CD81_MOUSE CD81 antigen OS=Mus musculus (Mouse) OX=10090 GN=Cd81 PE=1 SV=2	CD81	12.0595	12.1077	11.821	10.3217	11.3506	10.5676	11.0872	10.9585	11.873	10.6984	11.0166	10.9215
P40237	>sp|P40237|CD82_MOUSE CD82 antigen OS=Mus musculus (Mouse) OX=10090 GN=Cd82 PE=1 SV=1	CD82	9.76564	9.57261	10.437		10.347	10.2713	8.90079	9.66969	9.61327	9.81532	10.0431	9.89018
Q8CII2	>sp|Q8CII2|CD123_MOUSE Cell division cycle protein 123 homolog OS=Mus musculus (Mouse) OX=10090 GN=Cdc123 PE=1 SV=2	CDC123							10.9685	10.4474	10.0957		10.7191	11.1355
Q8R349	>sp|Q8R349|CDC16_MOUSE Cell division cycle protein 16 homolog OS=Mus musculus (Mouse) OX=10090 GN=Cdc16 PE=1 SV=1	CDC16	10.822	10.9477	10.7476	10.9282	10.8168	11.4789	11.0627	11.1206	11.4443	10.6409	11.0808	10.5669
Q8BGZ4	>sp|Q8BGZ4|CDC23_MOUSE Cell division cycle protein 23 homolog OS=Mus musculus (Mouse) OX=10090 GN=Cdc23 PE=1 SV=2	CDC23	11.1106	10.7609	11.3348	11.011	10.9709	10.8389	11.137	11.3694	10.7516	10.3539	10.8873	10.7164
Q61081	>sp|Q61081|CDC37_MOUSE Hsp90 co-chaperone Cdc37 OS=Mus musculus (Mouse) OX=10090 GN=Cdc37 PE=1 SV=1	CDC37	11.8467	11.7115	11.7017	11.6705	11.93	12.3941	11.8285	11.817	11.6715	11.7038	11.6383	11.9039
Q9DC48	>sp|Q9DC48|PRP17_MOUSE Pre-mRNA-processing factor 17 OS=Mus musculus (Mouse) OX=10090 GN=Cdc40 PE=2 SV=1	CDC40							10.5523	11.1192	10.5229		10.2367	10.0094
P60766	>sp|P60766|CDC42_MOUSE Cell division control protein 42 homolog OS=Mus musculus (Mouse) OX=10090 GN=Cdc42 PE=1 SV=2	CDC42	13.2026	13.0546	12.8419	11.85	12.8384	12.5644	13.0327	13.284	12.7192	12.1998	12.6545	12.7449
Q3UU96;Q7TT50	>sp|Q3UU96|MRCKA_MOUSE Serine/threonine-protein kinase MRCK alpha OS=Mus musculus (Mouse) OX=10090 GN=Cdc42bpa PE=1 SV=2;>sp|Q7TT50|MRCKB_MOUSE Serine/threonine-protein kinase MRCK beta OS=Mus musculus (Mouse) OX=10090 GN=Cdc42bpb PE=1 SV=2	CDC42BPA;CDC42BPB							9.46511	9.42058	9.66776	10.2894	11.2967	9.93089
Q7TT50	>sp|Q7TT50|MRCKB_MOUSE Serine/threonine-protein kinase MRCK beta OS=Mus musculus (Mouse) OX=10090 GN=Cdc42bpb PE=1 SV=2	CDC42BPB	11.1268	11.2502	10.8408	11.2387	11.2346	11.1709	10.975	11.1121	11.0755	10.9935	10.7653	11.07
Q91W92	>sp|Q91W92|BORG5_MOUSE Cdc42 effector protein 1 OS=Mus musculus (Mouse) OX=10090 GN=Cdc42ep1 PE=1 SV=1	CDC42EP1							10.2434	9.54164	9.1189		10.0884	10.5438
Q6A068	>sp|Q6A068|CDC5L_MOUSE Cell division cycle 5-like protein OS=Mus musculus (Mouse) OX=10090 GN=Cdc5l PE=1 SV=2	CDC5L	10.6924	10.7911	10.7116	10.6334	10.8345	10.758	10.6741	10.9754	11.0115	10.8265	10.8584	10.7842
Q8JZM7	>sp|Q8JZM7|CDC73_MOUSE Parafibromin OS=Mus musculus (Mouse) OX=10090 GN=Cdc73 PE=1 SV=1	CDC73	10.4444	10.096	10.733	10.5025	10.7268	10.8765	10.5794	10.4692	10.328	10.984	10.8566	10.7618
P15116	>sp|P15116|CADH2_MOUSE Cadherin-2 OS=Mus musculus (Mouse) OX=10090 GN=Cdh2 PE=1 SV=2	CDH2	12.2391	12.5075	12.164	11.6758	12.0912	11.8491	12.1078	12.287	12.0543	11.3627	11.2831	11.8811
Q8VDP6	>sp|Q8VDP6|CDIPT_MOUSE CDP-diacylglycerol--inositol 3-phosphatidyltransferase OS=Mus musculus (Mouse) OX=10090 GN=Cdipt PE=1 SV=1	CDIPT	12.4151	12.6553	12.3784	12.0762	12.6003	12.1871	12.3295	12.0068	12.4102	12.2672	12.2419	12.2501
P24788	>sp|P24788|CD11B_MOUSE Cyclin-dependent kinase 11B OS=Mus musculus (Mouse) OX=10090 GN=Cdk11b PE=1 SV=2	CDK11B	9.87843	9.42059	10.4473	10.2695	10.6079	10.1798	10.4798	10.1527	9.62481	10.7467	10.1014	10.2759
P30285	>sp|P30285|CDK4_MOUSE Cyclin-dependent kinase 4 OS=Mus musculus (Mouse) OX=10090 GN=Cdk4 PE=1 SV=1	CDK4	11.4335	11.3938	12.1051	11.3708	11.6495	11.3936	11.4117	11.2886	11.1336	10.5201	11.0455	11.09
P30285;P49615;Q69ZA1;Q99J95	>sp|P30285|CDK4_MOUSE Cyclin-dependent kinase 4 OS=Mus musculus (Mouse) OX=10090 GN=Cdk4 PE=1 SV=1;>sp|P49615|CDK5_MOUSE Cyclin-dependent-like kinase 5 OS=Mus musculus (Mouse) OX=10090 GN=Cdk5 PE=1 SV=1;>sp|Q69ZA1|CDK13_MOUSE Cyclin-dependent kinase 13 OS=Mus musculus (Mouse) OX=10090 GN=Cdk13 PE=1 SV=3;>sp|Q99J95|CDK9_MOUSE Cyclin-dependent kinase 9 OS=Mus musculus (Mouse) OX=10090 GN=Cdk9 PE=1 …	CDK4;CDK5;CDK13;CDK9	13.237	13.373	13.2597	13.7105	13.0861	13.6743	13.3199	13.4624	13.5107	13.9971	13.4951	13.3878
P49615	>sp|P49615|CDK5_MOUSE Cyclin-dependent-like kinase 5 OS=Mus musculus (Mouse) OX=10090 GN=Cdk5 PE=1 SV=1	CDK5	11.1492	10.7338	10.866		10.9872	10.8965	10.6696	11.0903	10.5561	11.1612	11.1709	10.7284
Q99LM2	>sp|Q99LM2|CK5P3_MOUSE CDK5 regulatory subunit-associated protein 3 OS=Mus musculus (Mouse) OX=10090 GN=Cdk5rap3 PE=1 SV=1	CDK5RAP3	11.0019	10.6305	11.3604	10.8212	10.539	10.8886	10.6982	10.6457	10.7766	10.9651	10.7095	10.7879
Q03147	>sp|Q03147|CDK7_MOUSE Cyclin-dependent kinase 7 OS=Mus musculus (Mouse) OX=10090 GN=Cdk7 PE=1 SV=2	CDK7							10.7083	10.5771	9.76448	9.51241		10.5151
Q99J95	>sp|Q99J95|CDK9_MOUSE Cyclin-dependent kinase 9 OS=Mus musculus (Mouse) OX=10090 GN=Cdk9 PE=1 SV=1	CDK9	10.5218	10.7964	11.3612	11.0005	10.6009	11.2118	10.912	10.7275	10.3841	10.8156	11.1065	10.6284
Q91WE6	>sp|Q91WE6|CDKAL_MOUSE Threonylcarbamoyladenosine tRNA methylthiotransferase OS=Mus musculus (Mouse) OX=10090 GN=Cdkal1 PE=1 SV=1	CDKAL1	12.0649	11.4183	10.791		11.645	11.0132
P49919	>sp|P49919|CDN1C_MOUSE Cyclin-dependent kinase inhibitor 1C OS=Mus musculus (Mouse) OX=10090 GN=Cdkn1c PE=1 SV=2	CDKN1C	10.2505	10.5824	10.7403		10.9142	10.2236
Q8BI72	>sp|Q8BI72|CARF_MOUSE CDKN2A-interacting protein OS=Mus musculus (Mouse) OX=10090 GN=Cdkn2aip PE=1 SV=1	CDKN2AIP	10.0055	9.42616		10.0994	9.9217	10.1865	10.2374	10.0481	9.68369	10.3838	10.6339	9.57332
Q99L43	>sp|Q99L43|CDS2_MOUSE Phosphatidate cytidylyltransferase 2 OS=Mus musculus (Mouse) OX=10090 GN=Cds2 PE=1 SV=1	CDS2	11.452	11.7197	11.887	11.7734	11.3274	11.6174	11.1972	11.4096	11.5173	11.2112	11.476	11.4647
Q4VAA2	>sp|Q4VAA2|CDV3_MOUSE Protein CDV3 OS=Mus musculus (Mouse) OX=10090 GN=Cdv3 PE=1 SV=2	CDV3							10.685	11.4074	10.841	10.813	11.4964	10.857
P53569	>sp|P53569|CEBPZ_MOUSE CCAAT/enhancer-binding protein zeta OS=Mus musculus (Mouse) OX=10090 GN=Cebpz PE=1 SV=2	CEBPZ	11.3908	11.4256	11.412	10.8083	11.5039	11.1811	9.82215	10.7779	10.6062	9.57542	10.4882	10.7619
Q8BTE5	>sp|Q8BTE5|CEBOS_MOUSE Protein CEBPZOS OS=Mus musculus (Mouse) OX=10090 GN=Cebpzos PE=3 SV=2	CEBPZOS							10.4838	9.15438	11.0297	10.5045	10.6404	10.6088
P28659	>sp|P28659|CELF1_MOUSE CUGBP Elav-like family member 1 OS=Mus musculus (Mouse) OX=10090 GN=Celf1 PE=1 SV=2	CELF1	11.3613	11.3687	12.0145	11.8235	11.035	11.6644	11.6855	11.8055	11.7003	12.1092	11.5638	11.2386
Q9CXS4	>sp|Q9CXS4|CENPV_MOUSE Centromere protein V OS=Mus musculus (Mouse) OX=10090 GN=Cenpv PE=1 SV=2	CENPV	13.3525	13.4975	13.6517	13.2246	13.4312	13.2111	13.5546	13.6471	13.2873	13.4835	13.2421	13.4989
Q8BI22	>sp|Q8BI22|CE128_MOUSE Centrosomal protein of 128 kDa OS=Mus musculus (Mouse) OX=10090 GN=Cep128 PE=1 SV=2	CEP128	12.4054		13.1019	12.9598	12.9524	12.5092		12.5216	12.4527	13.3023	13.5206	12.8874
Q62036	>sp|Q62036|CP131_MOUSE Centrosomal protein of 131 kDa OS=Mus musculus (Mouse) OX=10090 GN=Cep131 PE=1 SV=2	CEP131							9.9635	10.0254	10.2815	10.4415	10.2957	10.0527
Q497N6	>sp|Q497N6|C295L_MOUSE CEP295 N-terminal-like protein OS=Mus musculus (Mouse) OX=10090 GN=Cep295nl PE=1 SV=1	CEP295NL	13.7299	13.1726	13.7135	13.175	13.9167		13.4315	13.6583	13.6918	13.1316	13.9633	13.4624
Q6IQY5	>sp|Q6IQY5|CEP70_MOUSE Centrosomal protein of 70 kDa OS=Mus musculus (Mouse) OX=10090 GN=Cep70 PE=2 SV=1	CEP70		12.0192	12.9184	13.1934	12.2101	12.6916
Q8BGS7	>sp|Q8BGS7|CEPT1_MOUSE Choline/ethanolaminephosphotransferase 1 OS=Mus musculus (Mouse) OX=10090 GN=Cept1 PE=1 SV=1	CEPT1	13.9833	13.6313	13.4585	11.6966	13.7344	12.5547	13.4299	13.7105	13.7177	12.7215	13.0989	13.356
Q924Z4	>sp|Q924Z4|CERS2_MOUSE Ceramide synthase 2 OS=Mus musculus (Mouse) OX=10090 GN=Cers2 PE=1 SV=1	CERS2	11.9915	12.2239	12.6922	12.5631	12.6371	12.6794	11.9626	11.5573	12.1819	12.3729	12.102	12.1603
Q9EQG9	>sp|Q9EQG9|CERT_MOUSE Ceramide transfer protein OS=Mus musculus (Mouse) OX=10090 GN=Cert PE=1 SV=1	CERT	10.9323	10.8429	10.5702	10.8625	10.9832	11.0136	10.886	11.0395	10.6752	11.2038	10.8874	11.0266
Q8VCT4	>sp|Q8VCT4|CES1D_MOUSE Carboxylesterase 1D OS=Mus musculus (Mouse) OX=10090 GN=Ces1d PE=1 SV=1	CES1D	11.9747	10.8241	11.5831	10.9917	10.536	10.9687
Q8BTU1	>sp|Q8BTU1|CFA20_MOUSE Cilia- and flagella-associated protein 20 OS=Mus musculus (Mouse) OX=10090 GN=Cfap20 PE=1 SV=1	CFAP20	11.6647	11.2157	11.3712	11.6204	11.6083	11.8029	11.3099	11.574	10.2047	11.834	11.2824	11.4934
O88271	>sp|O88271|CFDP1_MOUSE Craniofacial development protein 1 OS=Mus musculus (Mouse) OX=10090 GN=Cfdp1 PE=1 SV=1	CFDP1	10.8941	10.5529	11.0979	10.7387	10.9843	10.7126	11.0983	11.0403	11.1841	11.1601	10.8536	11.0987
P06909	>sp|P06909|CFAH_MOUSE Complement factor H OS=Mus musculus (Mouse) OX=10090 GN=Cfh PE=1 SV=2	CFH	11.0248	10.326	10.6272		9.92535	9.64232	8.97126	9.40712	10.4666		10.6391	9.71833
P18760	>sp|P18760|COF1_MOUSE Cofilin-1 OS=Mus musculus (Mouse) OX=10090 GN=Cfl1 PE=1 SV=3	CFL1	13.7808	13.5442	13.3487	13.2125	13.2148	13.5161	13.1357	13.5157	13.0172	12.9149	13.1812	12.7207
P18760;P45591	>sp|P18760|COF1_MOUSE Cofilin-1 OS=Mus musculus (Mouse) OX=10090 GN=Cfl1 PE=1 SV=3;>sp|P45591|COF2_MOUSE Cofilin-2 OS=Mus musculus (Mouse) OX=10090 GN=Cfl2 PE=1 SV=1	CFL1;CFL2	16.7656	16.3976	16.533	16.3815	16.3124	16.7092	16.3569	16.2896	16.0777	16.3194	16.1018	16.2601
P45591	>sp|P45591|COF2_MOUSE Cofilin-2 OS=Mus musculus (Mouse) OX=10090 GN=Cfl2 PE=1 SV=1	CFL2	11.6982	11.4813	11.1888	11.1833	11.0374	11.5089	11.0412	11.3493	11.0415	11.0878	11.1963	10.9692
Q6AW69	>sp|Q6AW69|CGNL1_MOUSE Cingulin-like protein 1 OS=Mus musculus (Mouse) OX=10090 GN=Cgnl1 PE=1 SV=2	CGNL1	11.4614	10.9204	10.5068		10.7891	10.5239	10.6507	10.7443	10.7328	10.4855		10.1764
Q8K327	>sp|Q8K327|CHAP1_MOUSE Chromosome alignment-maintaining phosphoprotein 1 OS=Mus musculus (Mouse) OX=10090 GN=Champ1 PE=1 SV=1	CHAMP1	9.25701	9.99614	11.1528	10.3307	9.40921	10.7522
Q7TNL9	>tr|Q7TNL9|Q7TNL9_MOUSE Coiled-coil-helix-coiled-coil-helix domain-containing 10 OS=Mus musculus (Mouse) OX=10090 GN=Chchd10 PE=1 SV=1	CHCHD10	10.9584	11.1731	11.7293		11.4826	11.6513	11.1441	11.7523	12.0853	11.399	11.8141	11.8698
Q9D1L0	>sp|Q9D1L0|CHCH2_MOUSE Coiled-coil-helix-coiled-coil-helix domain-containing protein 2 OS=Mus musculus (Mouse) OX=10090 GN=Chchd2 PE=2 SV=1	CHCHD2	12.0091	12.5053	9.92673	9.9173	11.2926	10.0345	12.713	12.1262	12.7628	9.8456	10.2973	12.5912
Q9CRB9	>sp|Q9CRB9|MIC19_MOUSE MICOS complex subunit Mic19 OS=Mus musculus (Mouse) OX=10090 GN=Chchd3 PE=1 SV=1	CHCHD3	12.1334	12.2357	12.6435	12.4197	12.4762	12.1661	12.3895	12.0366	12.4465	12.6034	12.7301	12.3141
Q8VEA4	>sp|Q8VEA4|MIA40_MOUSE Mitochondrial intermembrane space import and assembly protein 40 OS=Mus musculus (Mouse) OX=10090 GN=Chchd4 PE=1 SV=1	CHCHD4							9.12747		9.71629	9.91969	9.68257	8.73185
Q91VN4	>sp|Q91VN4|MIC25_MOUSE MICOS complex subunit Mic25 OS=Mus musculus (Mouse) OX=10090 GN=Chchd6 PE=1 SV=2	CHCHD6	11.2883	11.5208	11.6184	11.5424	11.6732	11.2063	11.7116	11.3665	11.8204	11.6584	11.6907	11.8108
Q6PDQ2	>sp|Q6PDQ2|CHD4_MOUSE Chromodomain-helicase-DNA-binding protein 4 OS=Mus musculus (Mouse) OX=10090 GN=Chd4 PE=1 SV=1	CHD4	11.032	11.0314	10.7611	11.469	10.9033	11.3566	11.2424	11.0713	10.8956	11.0627	11.1305	11.1283
A2AJK6	>sp|A2AJK6|CHD7_MOUSE Chromodomain-helicase-DNA-binding protein 7 OS=Mus musculus (Mouse) OX=10090 GN=Chd7 PE=1 SV=1	CHD7							10.971	11.1331	11.7621	12.5696		11.9478
A2AJK6;A3KFM7	>sp|A2AJK6|CHD7_MOUSE Chromodomain-helicase-DNA-binding protein 7 OS=Mus musculus (Mouse) OX=10090 GN=Chd7 PE=1 SV=1;>sp|A3KFM7|CHD6_MOUSE Chromodomain-helicase-DNA-binding protein 6 OS=Mus musculus (Mouse) OX=10090 GN=Chd6 PE=1 SV=1	CHD7;CHD6	12.0536	12.232	11.8896	12.1895		10.8063
Q8CGZ0	>sp|Q8CGZ0|CHERP_MOUSE Calcium homeostasis endoplasmic reticulum protein OS=Mus musculus (Mouse) OX=10090 GN=Cherp PE=1 SV=1	CHERP							9.51794		8.98797	10.5441	11.0606	9.52181
P16014	>sp|P16014|SCG1_MOUSE Secretogranin-1 OS=Mus musculus (Mouse) OX=10090 GN=Chgb PE=1 SV=2	CHGB	9.93283	9.60355	10.7407	10.2976	10.414	9.73836	9.27197	10.0258	9.4573		10.1136	10.518
Q922Q9	>sp|Q922Q9|CHID1_MOUSE Chitinase domain-containing protein 1 OS=Mus musculus (Mouse) OX=10090 GN=Chid1 PE=1 SV=1	CHID1	10.6199	11.1942	11.1274	10.6242	11.0236	10.7943	11.0272	10.606	10.9688	10.2547	11.179	10.9023
Q921W0	>sp|Q921W0|CHM1A_MOUSE Charged multivesicular body protein 1a OS=Mus musculus (Mouse) OX=10090 GN=Chmp1a PE=1 SV=1	CHMP1A	11.3963	11.3727	11.8978	11.8158	11.6103	11.5991	11.4585	11.1461	11.197	10.9505	11.3696	11.338
Q99LU0	>sp|Q99LU0|CH1B1_MOUSE Charged multivesicular body protein 1b-1 OS=Mus musculus (Mouse) OX=10090 GN=Chmp1b1 PE=1 SV=1	CHMP1B1	12.7669	12.064	13.7353	13.8576	12.7753	13.914	12.3261	12.2108	12.6182	13.9783	11.0435	12.7108
Q9DB34	>sp|Q9DB34|CHM2A_MOUSE Charged multivesicular body protein 2a OS=Mus musculus (Mouse) OX=10090 GN=Chmp2a PE=1 SV=1	CHMP2A	10.1091	10.7875	10.8697	10.8554	10.9909	10.3756	10.4976	10.2984	9.70844	10.81	10.9749	10.3842
Q9CQ10	>sp|Q9CQ10|CHMP3_MOUSE Charged multivesicular body protein 3 OS=Mus musculus (Mouse) OX=10090 GN=Chmp3 PE=1 SV=3	CHMP3	11.4565	11.1696	12.2565	11.2166	11.5188	12.0471	11.4577	10.9886	11.3278	11.1311	11.377	10.6856
Q9D8B3	>sp|Q9D8B3|CHM4B_MOUSE Charged multivesicular body protein 4b OS=Mus musculus (Mouse) OX=10090 GN=Chmp4b PE=1 SV=2	CHMP4B	11.5434	11.0729	11.2197	11.7449	11.2695	12.0736	11.3594	10.8037	11.0595	11.2191	11.2977	11.3212
P0C0A3	>sp|P0C0A3|CHMP6_MOUSE Charged multivesicular body protein 6 OS=Mus musculus (Mouse) OX=10090 GN=Chmp6 PE=1 SV=2	CHMP6	10.8318	9.59426	10.9448	10.586	10.4911	11.2246	10.2878	9.98292	10.2033		10.0485	10.3003
Q8R1T1	>sp|Q8R1T1|CHMP7_MOUSE Charged multivesicular body protein 7 OS=Mus musculus (Mouse) OX=10090 GN=Chmp7 PE=1 SV=1	CHMP7	8.38855	8.53606		9.21747	9.46151	9.67536
Q9D1P4	>sp|Q9D1P4|CHRD1_MOUSE Cysteine and histidine-rich domain-containing protein 1 OS=Mus musculus (Mouse) OX=10090 GN=Chordc1 PE=1 SV=1	CHORDC1	10.4887	10.3243	11.3046	10.4173	10.8726	11.3095	10.8203	10.5899	10.8175	11.0929	10.8052	10.6998
P61022	>sp|P61022|CHP1_MOUSE Calcineurin B homologous protein 1 OS=Mus musculus (Mouse) OX=10090 GN=Chp1 PE=1 SV=2	CHP1	11.5393	11.8201	11.5779	11.0432	11.3848	10.7719	10.3791	10.5702	11.3955	10.3407	10.6377	10.6698
Q8C025	>sp|Q8C025|CHPT1_MOUSE Cholinephosphotransferase 1 OS=Mus musculus (Mouse) OX=10090 GN=Chpt1 PE=1 SV=1	CHPT1	13.0967	12.8568	13.068	12.863	12.8847	12.9656	12.5663	12.2735	12.5899	12.7234	12.9716	12.9625
Q9CY57	>sp|Q9CY57|CHTOP_MOUSE Chromatin target of PRMT1 protein OS=Mus musculus (Mouse) OX=10090 GN=Chtop PE=1 SV=2	CHTOP	10.5705	10.0298	10.551	9.98657	9.84744	9.7275	10.4971	10.9507	10.4667	10.6579	10.8473	10.667
Q60680	>sp|Q60680|IKKA_MOUSE Inhibitor of nuclear factor kappa-B kinase subunit alpha OS=Mus musculus (Mouse) OX=10090 GN=Chuk PE=1 SV=1	CHUK	10.6615	10.347		10.087	10.5475	9.54129	10.6488	10.4396	10.4181		10.8226	10.2537
Q9D187	>sp|Q9D187|CIA2B_MOUSE Cytosolic iron-sulfur assembly component 2B OS=Mus musculus (Mouse) OX=10090 GN=Ciao2b PE=1 SV=1	CIAO2B							9.30949	9.68093	9.87821		10.522	9.49885
P60824	>sp|P60824|CIRBP_MOUSE Cold-inducible RNA-binding protein OS=Mus musculus (Mouse) OX=10090 GN=Cirbp PE=1 SV=1	CIRBP	11.7646	11.1027	11.3378	11.3055	11.205	11.1437	11.5359	11.6631	11.3147	11.8757	11.6746	11.2189
Q91WS0	>sp|Q91WS0|CISD1_MOUSE CDGSH iron-sulfur domain-containing protein 1 OS=Mus musculus (Mouse) OX=10090 GN=Cisd1 PE=1 SV=1	CISD1	12.2709	12.6109	12.9743	12.108	12.6347	12.1381	12.416	12.2208	13.3776	13.2582	13.2882	13.109
Q9CQB5	>sp|Q9CQB5|CISD2_MOUSE CDGSH iron-sulfur domain-containing protein 2 OS=Mus musculus (Mouse) OX=10090 GN=Cisd2 PE=1 SV=1	CISD2	13.1698	13.166	13.0601	12.4079	13.2649	12.5345	12.614	13.0391	13.6242	13.0644	13.0023	13.3603
B1AR13	>sp|B1AR13|CISD3_MOUSE CDGSH iron-sulfur domain-containing protein 3, mitochondrial OS=Mus musculus (Mouse) OX=10090 GN=Cisd3 PE=1 SV=1	CISD3	9.68899	9.09896	10.558		9.91042	9.41233	9.25894	8.74343	9.4956	9.64884	9.86729	9.90317
Q8BMK4	>sp|Q8BMK4|CKAP4_MOUSE Cytoskeleton-associated protein 4 OS=Mus musculus (Mouse) OX=10090 GN=Ckap4 PE=1 SV=2	CKAP4	12.095	12.149	12.2587	12.1334	12.1052	12.2026	11.6548	11.5385	11.4977	11.7052	11.7195	11.598
A2AGT5	>sp|A2AGT5|CKAP5_MOUSE Cytoskeleton-associated protein 5 OS=Mus musculus (Mouse) OX=10090 GN=Ckap5 PE=1 SV=1	CKAP5	10.9722	11.1045	10.9401	10.8756	10.9242	11.1327	10.7463	10.8755	10.7078	10.976	10.7962	10.569
Q04447	>sp|Q04447|KCRB_MOUSE Creatine kinase B-type OS=Mus musculus (Mouse) OX=10090 GN=Ckb PE=1 SV=1	CKB	13.6633	13.4179	13.104	12.8593	13.0212	13.4297	13.1197	13.2716	12.8114	12.6202	12.3807	12.632
Q80TV8;Q8BRT1	>sp|Q80TV8|CLAP1_MOUSE CLIP-associating protein 1 OS=Mus musculus (Mouse) OX=10090 GN=Clasp1 PE=1 SV=2;>sp|Q8BRT1|CLAP2_MOUSE CLIP-associating protein 2 OS=Mus musculus (Mouse) OX=10090 GN=Clasp2 PE=1 SV=1	CLASP1;CLASP2	11.8371	12.0138	10.8579	12.1431	11.0692	12.0023
Q8BRT1	>sp|Q8BRT1|CLAP2_MOUSE CLIP-associating protein 2 OS=Mus musculus (Mouse) OX=10090 GN=Clasp2 PE=1 SV=1	CLASP2	10.9427	10.957	10.9612	11.162	10.9428	11.0435	11.0959	11.099	10.8145	10.9923	10.8268	10.6576
Q99LI2	>sp|Q99LI2|CLCC1_MOUSE Chloride channel CLIC-like protein 1 OS=Mus musculus (Mouse) OX=10090 GN=Clcc1 PE=1 SV=1	CLCC1	11.2549	11.1683	11.18	11.1692	11.2144	11.195	11.1453	10.8889	10.968	11.061	10.8938	10.9104
Q61418	>sp|Q61418|CLCN4_MOUSE H(+)/Cl(-) exchange transporter 4 OS=Mus musculus (Mouse) OX=10090 GN=Clcn4 PE=2 SV=2	CLCN4	11.1153	11.6148	10.7105	11.2157	11.0669	10.6583	10.9281	10.9869	11.013	10.54	10.9042	10.9302
O88551	>sp|O88551|CLD1_MOUSE Claudin-1 OS=Mus musculus (Mouse) OX=10090 GN=Cldn1 PE=1 SV=1	CLDN1	12.2257	12.8261	10.95		11.2319	10.8914	10.4599	11.4628	10.8731	10.893	10.551	9.76125
Q9CQX5	>sp|Q9CQX5|CLDN1_MOUSE Claudin domain-containing protein 1 OS=Mus musculus (Mouse) OX=10090 GN=Cldnd1 PE=1 SV=1	CLDND1	11.0654	11.2582	11.9059		12.6874	11.0952
Q9Z1Q5	>sp|Q9Z1Q5|CLIC1_MOUSE Chloride intracellular channel protein 1 OS=Mus musculus (Mouse) OX=10090 GN=Clic1 PE=1 SV=3	CLIC1	13.0325	12.7791	12.9578	12.6622	12.5982	12.9213	12.398	12.6808	12.2227	12.2431	12.3916	12.2499
Q9QYB1	>sp|Q9QYB1|CLIC4_MOUSE Chloride intracellular channel protein 4 OS=Mus musculus (Mouse) OX=10090 GN=Clic4 PE=1 SV=3	CLIC4	11.6955	11.7484	11.9625	11.5943	11.2827	11.5401
Q99KN9	>sp|Q99KN9|EPN4_MOUSE Clathrin interactor 1 OS=Mus musculus (Mouse) OX=10090 GN=Clint1 PE=1 SV=2	CLINT1	11.773	11.5872	11.7748	11.947	11.5465	11.8581	11.7313	11.5501	11.4412	11.7408	11.7278	11.5373
Q922J3	>sp|Q922J3|CLIP1_MOUSE CAP-Gly domain-containing linker protein 1 OS=Mus musculus (Mouse) OX=10090 GN=Clip1 PE=1 SV=1	CLIP1	10.984	10.5563	10.9143	10.8461	10.8782	11.1466	11.0684	11.1368	10.8268	10.9765	10.8378	10.9598
Q61189	>sp|Q61189|ICLN_MOUSE Methylosome subunit pICln OS=Mus musculus (Mouse) OX=10090 GN=Clns1a PE=1 SV=1	CLNS1A	10.5035	10.4629	10.4892	10.8082	10.7407	10.2898	10.1727	10.9433	10.0332	10.5708		10.5135
Q99LI9	>sp|Q99LI9|CLP1_MOUSE Polyribonucleotide 5'-hydroxyl-kinase Clp1 OS=Mus musculus (Mouse) OX=10090 GN=Clp1 PE=1 SV=1	CLP1							10.8275	10.2246	11.2471	11.8036	11.218	11.332
Q60649	>sp|Q60649|CLPB_MOUSE Caseinolytic peptidase B protein homolog OS=Mus musculus (Mouse) OX=10090 GN=Clpb PE=1 SV=1	CLPB	11.3925	11.4053	11.6916	11.6278	11.7312	11.2535	11.5578	11.3649	11.8527	11.6403	11.7715	11.5887
O88696	>sp|O88696|CLPP_MOUSE ATP-dependent Clp protease proteolytic subunit, mitochondrial OS=Mus musculus (Mouse) OX=10090 GN=Clpp PE=1 SV=1	CLPP	12.7395	13.0328	13.0455	13.032	13.2287	12.5989	12.9427	12.7709	13.3379	13.2481	13.264	13.3297
Q8VBZ3	>sp|Q8VBZ3|CLPT1_MOUSE Cleft lip and palate transmembrane protein 1 homolog OS=Mus musculus (Mouse) OX=10090 GN=Clptm1 PE=1 SV=1	CLPTM1	10.8158	10.8995	11.0045	10.7562	10.8545	10.7406	10.4204	10.4649	10.5182	10.6595	10.9092	10.4936
Q8BXA5	>sp|Q8BXA5|CLP1L_MOUSE Cleft lip and palate transmembrane protein 1-like protein OS=Mus musculus (Mouse) OX=10090 GN=Clptm1l PE=1 SV=1	CLPTM1L	11.394	12.0728	11.9885	12.1929	11.6089	11.3669	11.6915	11.0096	11.4428	11.2083	11.645	11.6091
Q9JHS4	>sp|Q9JHS4|CLPX_MOUSE ATP-dependent Clp protease ATP-binding subunit clpX-like, mitochondrial OS=Mus musculus (Mouse) OX=10090 GN=Clpx PE=1 SV=2	CLPX	11.8573	11.7725	11.9622	12.0277	11.9354	11.8124	11.9079	11.7607	12.1549	12.003	12.0772	12.1059
O08585	>sp|O08585|CLCA_MOUSE Clathrin light chain A OS=Mus musculus (Mouse) OX=10090 GN=Clta PE=1 SV=2	CLTA	12.3623	11.9571	11.9908	12.2214	12.4184	12.7983	12.2267	11.8741	11.684	11.6949	11.8086	12.1758
Q6IRU5	>sp|Q6IRU5|CLCB_MOUSE Clathrin light chain B OS=Mus musculus (Mouse) OX=10090 GN=Cltb PE=1 SV=1	CLTB	10.1708	10.0681	10.8132	9.55347	10.2988	10.7848	10.1148	9.99212	9.61484	10.6418		10.0226
Q68FD5	>sp|Q68FD5|CLH1_MOUSE Clathrin heavy chain 1 OS=Mus musculus (Mouse) OX=10090 GN=Cltc PE=1 SV=3	CLTC	13.1062	13.0252	12.7216	13.0783	12.8368	13.1081	13.019	13.1647	12.6399	12.7052	12.6657	12.8059
Q06890	>sp|Q06890|CLUS_MOUSE Clusterin OS=Mus musculus (Mouse) OX=10090 GN=Clu PE=1 SV=1	CLU	11.0648	10.8302	10.7155	10.6049	11.0915	10.5193	10.4195	10.5447	10.796	10.1344	10.4929	10.8862
Q5SW19	>sp|Q5SW19|CLU_MOUSE Clustered mitochondria protein homolog OS=Mus musculus (Mouse) OX=10090 GN=Cluh PE=1 SV=2	CLUH	11.7862	11.6779	11.6679	11.839	11.5728	11.9373	11.6589	11.8045	11.5095	11.4942	11.4954	11.5515
Q8R4N0	>sp|Q8R4N0|CLYBL_MOUSE Citramalyl-CoA lyase, mitochondrial OS=Mus musculus (Mouse) OX=10090 GN=Clybl PE=1 SV=2	CLYBL	12.1469	12.0437	12.2516	12.2605	12.1675	11.6879	11.9139	12.0339	12.2909	12.3111	12.3517	12.2112
Q99KK2	>sp|Q99KK2|NEUA_MOUSE N-acylneuraminate cytidylyltransferase OS=Mus musculus (Mouse) OX=10090 GN=Cmas PE=1 SV=2	CMAS	11.2601	10.9407	10.5331	10.2133	11.0837	11.8608	11.5184	11.4298	11.3176	11.5852		11.4157
Q8R1G2	>sp|Q8R1G2|CMBL_MOUSE Carboxymethylenebutenolidase homolog OS=Mus musculus (Mouse) OX=10090 GN=Cmbl PE=1 SV=1	CMBL	12.4305	12.0766	12.1643	12.0097	12.1679	12.4327	12.559	12.6734	12.3835	12.0402	12.5881	12.5493
Q9JIZ0	>sp|Q9JIZ0|CMLO1_MOUSE Probable N-acetyltransferase CML1 OS=Mus musculus (Mouse) OX=10090 GN=Cml1 PE=1 SV=1	CML1	12.4761	11.3525	12.9817		11.3409	11.4686	11.6914	11.7238	12.0722	12.5064	11.3858	12.0097
Q9QXS8	>sp|Q9QXS8|CMLO5_MOUSE Probable N-acetyltransferase CML5 OS=Mus musculus (Mouse) OX=10090 GN=Cml5 PE=2 SV=2	CML5	11.1132	10.3252	11.3836	11.4789	11.1435	10.5655	11.214	11.1225	11.4932	11.6677	11.6698	10.5363
Q9DBP5	>sp|Q9DBP5|KCY_MOUSE UMP-CMP kinase OS=Mus musculus (Mouse) OX=10090 GN=Cmpk1 PE=1 SV=1	CMPK1	12.6938	12.5299	12.6	12.2863	12.5042	12.8299	12.3899	12.5411	12.4134	12.485	12.295	12.3662
Q3U5Q7	>sp|Q3U5Q7|CMPK2_MOUSE UMP-CMP kinase 2, mitochondrial OS=Mus musculus (Mouse) OX=10090 GN=Cmpk2 PE=1 SV=2	CMPK2	13.1136	13.234	13.3506	13.4953	13.4169	13.5622	12.0336	11.9989	12.0679	12.1711	12.0864	12.1124
Q9CZ69	>sp|Q9CZ69|CKLF6_MOUSE CKLF-like MARVEL transmembrane domain-containing protein 6 OS=Mus musculus (Mouse) OX=10090 GN=Cmtm6 PE=1 SV=1	CMTM6	10.4422	10.6157	10.4486		10.0055	10.6237
Q9DBC3	>sp|Q9DBC3|CMTR1_MOUSE Cap-specific mRNA (nucleoside-2'-O-)-methyltransferase 1 OS=Mus musculus (Mouse) OX=10090 GN=Cmtr1 PE=1 SV=1	CMTR1	11.158	10.5816	11.1537	10.6731	10.9619	10.5916	10.7012	10.6828	10.9994	11.2113	11.0424	10.6023
Q9D1A2	>sp|Q9D1A2|CNDP2_MOUSE Cytosolic non-specific dipeptidase OS=Mus musculus (Mouse) OX=10090 GN=Cndp2 PE=1 SV=1	CNDP2	12.0317	12.1921	12.0542	11.688	11.9056	12.1986	12.0896	12.2636	11.8254	11.9673	12.0032	11.8872
Q3UJ81	>sp|Q3UJ81|NEPR1_MOUSE Nuclear envelope phosphatase-regulatory subunit 1 OS=Mus musculus (Mouse) OX=10090 GN=Cnep1r1 PE=1 SV=1	CNEP1R1							10.739	11.3803	11.2167		11.2969	11.0521
Q9CX13	>sp|Q9CX13|CNIH4_MOUSE Protein cornichon homolog 4 OS=Mus musculus (Mouse) OX=10090 GN=Cnih4 PE=2 SV=1	CNIH4	12.2791	11.8755	11.5107		11.6087	11.0349	11.1624	10.7728	11.3166		11.6856	11.1311
Q9DAW9	>sp|Q9DAW9|CNN3_MOUSE Calponin-3 OS=Mus musculus (Mouse) OX=10090 GN=Cnn3 PE=1 SV=1	CNN3	12.1235	11.9275	12.0698	12.0569	12.0991	12.3024	11.8551	11.7583	11.4893	12.0027	11.6115	11.4464
Q32NY4	>sp|Q32NY4|CNNM3_MOUSE Metal transporter CNNM3 OS=Mus musculus (Mouse) OX=10090 GN=Cnnm3 PE=1 SV=2	CNNM3	10.1509	9.7987	10.4558		10.1569	10.591	10.2816	9.49973	10.364	10.0537	10.6911	10.3401
Q6ZQ08	>sp|Q6ZQ08|CNOT1_MOUSE CCR4-NOT transcription complex subunit 1 OS=Mus musculus (Mouse) OX=10090 GN=Cnot1 PE=1 SV=2	CNOT1	11.0809	10.8305	10.983	10.8123	10.5899	10.7728	10.9399	11.0064	10.7905	10.7511	10.5917	10.5758
Q8BH15	>sp|Q8BH15|CNO10_MOUSE CCR4-NOT transcription complex subunit 10 OS=Mus musculus (Mouse) OX=10090 GN=Cnot10 PE=1 SV=1	CNOT10	8.78298	9.26736	9.98696		9.52032	9.15255
Q8C5L3	>sp|Q8C5L3|CNOT2_MOUSE CCR4-NOT transcription complex subunit 2 OS=Mus musculus (Mouse) OX=10090 GN=Cnot2 PE=1 SV=2	CNOT2	10.43	9.92919	10.0016	11.0562	10.3806	10.0067
Q60809	>sp|Q60809|CNOT7_MOUSE CCR4-NOT transcription complex subunit 7 OS=Mus musculus (Mouse) OX=10090 GN=Cnot7 PE=1 SV=1	CNOT7							10.69	10.1638	10.6575		10.6054	10.2148
Q9JKY0	>sp|Q9JKY0|CNOT9_MOUSE CCR4-NOT transcription complex subunit 9 OS=Mus musculus (Mouse) OX=10090 GN=Cnot9 PE=1 SV=1	CNOT9	9.92269	10.573	10.673	10.7062	9.64276	10.4669	10.7137	10.6035	10.5778	9.86536	10.0118	9.81008
P16330	>sp|P16330|CN37_MOUSE 2',3'-cyclic-nucleotide 3'-phosphodiesterase OS=Mus musculus (Mouse) OX=10090 GN=Cnp PE=1 SV=3	CNP	12.1308	12.0069	12.2385	12.1594	12.0195	11.7142	12.1007	11.9818	12.2855	11.9943	12.2602	12.1697
Q9QXT0	>sp|Q9QXT0|CNPY2_MOUSE Protein canopy homolog 2 OS=Mus musculus (Mouse) OX=10090 GN=Cnpy2 PE=1 SV=1	CNPY2	13.2422	13.2475	13.4184	12.9938	13.2245	13.0183	13.1234	13.0664	13.303	13.5025	13.3529	13.3532
Q9DAU1	>sp|Q9DAU1|CNPY3_MOUSE Protein canopy homolog 3 OS=Mus musculus (Mouse) OX=10090 GN=Cnpy3 PE=1 SV=1	CNPY3	13.2022	12.7756	14.1144		13.564	14.1904	13.4314	13.5931	13.5994	14.1015		13.6513
Q8BQ47	>sp|Q8BQ47|CNPY4_MOUSE Protein canopy homolog 4 OS=Mus musculus (Mouse) OX=10090 GN=Cnpy4 PE=1 SV=1	CNPY4	11.0166	11.6617	11.26	11.267	11.4856	11.2266	10.9497	11.331	11.1656	10.4506	10.9534	11.1936
Q5M8N0	>sp|Q5M8N0|CNRP1_MOUSE CB1 cannabinoid receptor-interacting protein 1 OS=Mus musculus (Mouse) OX=10090 GN=Cnrip1 PE=1 SV=1	CNRIP1	10.5662	10.7256	10.6908	10.3732	10.5608	10.2849	10.8807	10.4517	10.5764	10.5317	10.5617	10.4466
Q69Z26	>sp|Q69Z26|CNTN4_MOUSE Contactin-4 OS=Mus musculus (Mouse) OX=10090 GN=Cntn4 PE=1 SV=2	CNTN4	11.9347	12.0141	12.4792	12.0015	11.6735	12.3715
Q99P47	>sp|Q99P47|CNTP4_MOUSE Contactin-associated protein-like 4 OS=Mus musculus (Mouse) OX=10090 GN=Cntnap4 PE=1 SV=2	CNTNAP4							10.9778	10.8167	10.8487	10.9319		11.0966
Q9D2R6	>sp|Q9D2R6|COA3_MOUSE Cytochrome c oxidase assembly factor 3 homolog, mitochondrial OS=Mus musculus (Mouse) OX=10090 GN=Coa3 PE=1 SV=1	COA3							11.5203	10.8905	11.8526	12.2591	12.023	11.9226
Q921H9	>sp|Q921H9|COA7_MOUSE Cytochrome c oxidase assembly factor 7 OS=Mus musculus (Mouse) OX=10090 GN=Coa7 PE=1 SV=1	COA7	12.1464	12.5045	12.5825	12.3573	12.4297	12.1574	12.3083	12.2109	12.7136	12.6057	12.6931	12.5707
Q9DBL7	>sp|Q9DBL7|COASY_MOUSE Bifunctional coenzyme A synthase OS=Mus musculus (Mouse) OX=10090 GN=Coasy PE=1 SV=2	COASY	11.693	11.7413	11.6399	11.5944	11.7458	11.845	12.0171	12.0042	11.8248	12.0568	12.0675	12.0175
Q3UMF0	>sp|Q3UMF0|COBL1_MOUSE Cordon-bleu protein-like 1 OS=Mus musculus (Mouse) OX=10090 GN=Cobll1 PE=1 SV=2	COBLL1	11.4328	11.2941	11.1709	11.4959	11.3315	11.6149	11.735	11.5988	11.4563	11.5072	11.6491	11.6517
Q9Z160	>sp|Q9Z160|COG1_MOUSE Conserved oligomeric Golgi complex subunit 1 OS=Mus musculus (Mouse) OX=10090 GN=Cog1 PE=1 SV=3	COG1	10.0151	9.683	9.93097	10.0677	10.146	10.34	10.1408	10.7599	9.94506	9.52312	10.4971	10.0841
Q921L5	>sp|Q921L5|COG2_MOUSE Conserved oligomeric Golgi complex subunit 2 OS=Mus musculus (Mouse) OX=10090 GN=Cog2 PE=1 SV=2	COG2	10.902	10.645	10.5379	10.2276	10.9173	10.28	10.7612	10.7574	10.7457	10.5608	10.8182	10.6181
Q8CI04	>sp|Q8CI04|COG3_MOUSE Conserved oligomeric Golgi complex subunit 3 OS=Mus musculus (Mouse) OX=10090 GN=Cog3 PE=1 SV=3	COG3	9.98389	10.0755		10.4527	9.79569	10.4491	10.3105	10.3122	9.88209	9.36188	9.64948	10.2617
Q8R1U1	>sp|Q8R1U1|COG4_MOUSE Conserved oligomeric Golgi complex subunit 4 OS=Mus musculus (Mouse) OX=10090 GN=Cog4 PE=1 SV=1	COG4	10.5478	10.2948		10.4584	10.5603	10.9785	10.5509	10.8416	10.3065	10.9281	10.2568	10.8991
Q8C0L8	>sp|Q8C0L8|COG5_MOUSE Conserved oligomeric Golgi complex subunit 5 OS=Mus musculus (Mouse) OX=10090 GN=Cog5 PE=1 SV=3	COG5	10.6596	11.5757	11.2053	11.2744	10.8294	11.1945	11.0138	10.9142	10.2841	10.8507	11.4549	11.4959
Q8R3I3	>sp|Q8R3I3|COG6_MOUSE Conserved oligomeric Golgi complex subunit 6 OS=Mus musculus (Mouse) OX=10090 GN=Cog6 PE=1 SV=2	COG6							9.53148	9.13702	9.64845	9.43646	9.88488	9.73618
Q3UM29	>sp|Q3UM29|COG7_MOUSE Conserved oligomeric Golgi complex subunit 7 OS=Mus musculus (Mouse) OX=10090 GN=Cog7 PE=1 SV=1	COG7							10.9306	11.2045	11.0088	11.0093	11.7391	10.6046
Q9JJA2	>sp|Q9JJA2|COG8_MOUSE Conserved oligomeric Golgi complex subunit 8 OS=Mus musculus (Mouse) OX=10090 GN=Cog8 PE=1 SV=3	COG8							8.96716	9.38706	9.58999		10.2744	9.22166
Q5SU73	>sp|Q5SU73|COIL_MOUSE Coilin OS=Mus musculus (Mouse) OX=10090 GN=Coil PE=1 SV=1	COIL							10.2038	10.2951	10.205	11.0499		10.1492
P39061	>sp|P39061|COIA1_MOUSE Collagen alpha-1(XVIII) chain OS=Mus musculus (Mouse) OX=10090 GN=Col18a1 PE=1 SV=4	COL18A1	14.5155		15.9512	15.6528	15.0099	15.477	13.4274	14.3049	14.0493	15.5009	14.9911	13.7879
P11087	>sp|P11087|CO1A1_MOUSE Collagen alpha-1(I) chain OS=Mus musculus (Mouse) OX=10090 GN=Col1a1 PE=1 SV=4	COL1A1	9.19825	9.58021		10.2912	10.1596	9.99996	10.4229	9.07506	8.64488		9.94364	9.38116
Q01149	>sp|Q01149|CO1A2_MOUSE Collagen alpha-2(I) chain OS=Mus musculus (Mouse) OX=10090 GN=Col1a2 PE=1 SV=2	COL1A2	8.62547	8.78783	10.2508	9.74023	10.2709
P02463	>sp|P02463|CO4A1_MOUSE Collagen alpha-1(IV) chain OS=Mus musculus (Mouse) OX=10090 GN=Col4a1 PE=1 SV=4	COL4A1	11.9933	10.7334	13.129	12.4922	12.6408	12.5786	10.8718	10.198	10.7307	11.8979	11.731	11.0196
P08122	>sp|P08122|CO4A2_MOUSE Collagen alpha-2(IV) chain OS=Mus musculus (Mouse) OX=10090 GN=Col4a2 PE=1 SV=4	COL4A2	12.1305	12.2613	12.1585	11.328	11.8872	11.9144	10.659	11.6699	11.1469	11.21	10.9819	10.6618
Q63ZW6	>tr|Q63ZW6|Q63ZW6_MOUSE Collagen IV NC1 domain-containing protein OS=Mus musculus (Mouse) OX=10090 GN=Col4a5 PE=1 SV=1	COL4A5	11.7015		11.8839	12.2276	11.9478	11.8578
Q04857	>sp|Q04857|CO6A1_MOUSE Collagen alpha-1(VI) chain OS=Mus musculus (Mouse) OX=10090 GN=Col6a1 PE=1 SV=1	COL6A1	12.6146	13.4667	13.2339	13.5457	13.0713	12.2836	11.9986	12.4373	12.1489	12.7049	12.1857	11.4326
Q02788	>sp|Q02788|CO6A2_MOUSE Collagen alpha-2(VI) chain OS=Mus musculus (Mouse) OX=10090 GN=Col6a2 PE=1 SV=3	COL6A2	12.4757	13.1061	13.0467	13.2819	12.6404	12.2141	11.704	12.3282	11.9447	12.4554	11.9554	11.2253
E9PWQ3	>tr|E9PWQ3|E9PWQ3_MOUSE Collagen, type VI, alpha 3 OS=Mus musculus (Mouse) OX=10090 GN=Col6a3 PE=1 SV=2	COL6A3	12.0452	12.6041	12.5916	12.6221	12.2271	11.7683	11.1471	11.7912	11.3405	11.9257	11.6636	10.915
A6H584	>sp|A6H584|CO6A5_MOUSE Collagen alpha-5(VI) chain OS=Mus musculus (Mouse) OX=10090 GN=Col6a5 PE=1 SV=4	COL6A5	10.8186	11.8389	11.5718	12.0286	11.2091	10.5418	10.5598	11.0301	10.5322	10.6657	11.0093	10.337
A6H584;Q8C6K9	>sp|A6H584|CO6A5_MOUSE Collagen alpha-5(VI) chain OS=Mus musculus (Mouse) OX=10090 GN=Col6a5 PE=1 SV=4;>sp|Q8C6K9|CO6A6_MOUSE Collagen alpha-6(VI) chain OS=Mus musculus (Mouse) OX=10090 GN=Col6a6 PE=1 SV=2	COL6A5;COL6A6	12.084	12.2667		12.0833	11.9764	12.2543	11.3969	11.7307	12.5246	12.0439	12.1895
Q8K297	>sp|Q8K297|GT251_MOUSE Procollagen galactosyltransferase 1 OS=Mus musculus (Mouse) OX=10090 GN=Colgalt1 PE=1 SV=2	COLGALT1	11.8335	11.8396	11.9893	11.4245	12.1028	11.786	11.0796	10.88	11.1519	11.2174	11.1642	11.0352
Q8K4M5	>sp|Q8K4M5|COMD1_MOUSE COMM domain-containing protein 1 OS=Mus musculus (Mouse) OX=10090 GN=Commd1 PE=1 SV=2	COMMD1	9.24905	9.35685	9.83386		9.49067	10.1616	9.52041	9.88996	9.59531	9.21288	10.3207	9.4086
Q8JZY2	>sp|Q8JZY2|COMDA_MOUSE COMM domain-containing protein 10 OS=Mus musculus (Mouse) OX=10090 GN=Commd10 PE=1 SV=1	COMMD10	10.5541	10.4707	10.5798	10.2788		10.4888	10.4514	10.8321	10.5284	10.8842	10.8053	10.7319
Q63829	>sp|Q63829|COMD3_MOUSE COMM domain-containing protein 3 OS=Mus musculus (Mouse) OX=10090 GN=Commd3 PE=1 SV=1	COMMD3	11.6863	11.461	11.6766	11.6416	11.3172	11.2887	11.6155	11.9218	11.8586	11.3012	11.1495	11.5215
Q9CQ02	>sp|Q9CQ02|COMD4_MOUSE COMM domain-containing protein 4 OS=Mus musculus (Mouse) OX=10090 GN=Commd4 PE=1 SV=1	COMMD4	10.0717	11.1689	11.0216	10.4719	11.2328	11.0741	10.4991	10.9438	9.85137		10.3591	10.8798
Q8BG94	>sp|Q8BG94|COMD7_MOUSE COMM domain-containing protein 7 OS=Mus musculus (Mouse) OX=10090 GN=Commd7 PE=1 SV=1	COMMD7	10.625	10.192	10.6574	11.2843	10.7067		10.6514	10.801	10.0726	11.6444	10.9312	10.4187
Q9CZG3	>sp|Q9CZG3|COMD8_MOUSE COMM domain-containing protein 8 OS=Mus musculus (Mouse) OX=10090 GN=Commd8 PE=1 SV=1	COMMD8	10.5926	10.0024	11.2376	10.9076	10.7186	10.4503
Q8K2Q0	>sp|Q8K2Q0|COMD9_MOUSE COMM domain-containing protein 9 OS=Mus musculus (Mouse) OX=10090 GN=Commd9 PE=1 SV=3	COMMD9	10.7444	10.6552	10.3541	10.4896	10.774	11.3973	10.5102	10.4604	10.3188	10.4632	10.6039	10.5474
O88587	>sp|O88587|COMT_MOUSE Catechol O-methyltransferase OS=Mus musculus (Mouse) OX=10090 GN=Comt PE=1 SV=2	COMT	12.7023	12.6715	12.5281	12.8399	12.6063	12.5209	12.8495	12.7265	12.5395	12.5034	12.3683	12.5753
Q8BIG7	>sp|Q8BIG7|CMTD1_MOUSE Catechol O-methyltransferase domain-containing protein 1 OS=Mus musculus (Mouse) OX=10090 GN=Comtd1 PE=1 SV=1	COMTD1	10.9785	11.5727	11.9332	12.1145	11.6308	11.2259	11.5301	10.9133	12.1767	12.1029	12.1741	12.1994
Q8CIE6	>sp|Q8CIE6|COPA_MOUSE Coatomer subunit alpha OS=Mus musculus (Mouse) OX=10090 GN=Copa PE=1 SV=2	COPA	12.4019	12.369	12.0645	12.266	12.1725	12.3588	12.3231	12.3836	12.11	12.1389	12.1714	12.1625
Q9JIF7	>sp|Q9JIF7|COPB_MOUSE Coatomer subunit beta OS=Mus musculus (Mouse) OX=10090 GN=Copb1 PE=1 SV=1	COPB1	11.9023	11.938	11.8256	11.6664	11.6404	11.9429	11.8773	12.0549	11.7306	11.5161	11.5695	11.8163
O55029	>sp|O55029|COPB2_MOUSE Coatomer subunit beta' OS=Mus musculus (Mouse) OX=10090 GN=Copb2 PE=1 SV=2	COPB2	11.7356	11.6188	11.5548	11.7022	11.5563	11.8082	11.767	11.7608	11.5947	11.576	11.5693	11.5844
O89079	>sp|O89079|COPE_MOUSE Coatomer subunit epsilon OS=Mus musculus (Mouse) OX=10090 GN=Cope PE=1 SV=3	COPE	12.3321	12.3802	11.6695	11.7385	12.1492	12.2812	12.2549	12.1613	11.8121	12.0803	12.4054	12.1315
Q9QZE5	>sp|Q9QZE5|COPG1_MOUSE Coatomer subunit gamma-1 OS=Mus musculus (Mouse) OX=10090 GN=Copg1 PE=1 SV=1	COPG1	11.5887	11.5091	11.1326	11.3825	11.2627	11.4892	11.4367	11.6503	11.2403	11.1802	11.5944	11.342
Q9QXK3	>sp|Q9QXK3|COPG2_MOUSE Coatomer subunit gamma-2 OS=Mus musculus (Mouse) OX=10090 GN=Copg2 PE=1 SV=1	COPG2	11.3874	11.348	11.5892	11.4621	11.3763	11.6158	11.6409	11.52	11.4132	11.5181	11.3441	11.4883
Q9QXK3;Q9QZE5	>sp|Q9QXK3|COPG2_MOUSE Coatomer subunit gamma-2 OS=Mus musculus (Mouse) OX=10090 GN=Copg2 PE=1 SV=1;>sp|Q9QZE5|COPG1_MOUSE Coatomer subunit gamma-1 OS=Mus musculus (Mouse) OX=10090 GN=Copg1 PE=1 SV=1	COPG2;COPG1	11.3113	11.3392	11.4985	12.1288	11.7542	11.9125
P61202	>sp|P61202|CSN2_MOUSE COP9 signalosome complex subunit 2 OS=Mus musculus (Mouse) OX=10090 GN=Cops2 PE=1 SV=1	COPS2	11.7155	11.3979	11.5093	11.3923	11.513	11.798	11.6295	11.5743	11.4455	11.4511	11.352	11.4784
O88543	>sp|O88543|CSN3_MOUSE COP9 signalosome complex subunit 3 OS=Mus musculus (Mouse) OX=10090 GN=Cops3 PE=1 SV=3	COPS3	11.9534	12.0616	11.86	11.2682	11.4189	11.5448	12.0161	11.9982	11.5081	11.2612	11.5731	11.6556
O88544	>sp|O88544|CSN4_MOUSE COP9 signalosome complex subunit 4 OS=Mus musculus (Mouse) OX=10090 GN=Cops4 PE=1 SV=1	COPS4	11.5353	11.4172	11.3206	11.4225	11.4083	11.59	11.5595	11.7029	11.1631	11.2181	11.3131	11.3189
O35864	>sp|O35864|CSN5_MOUSE COP9 signalosome complex subunit 5 OS=Mus musculus (Mouse) OX=10090 GN=Cops5 PE=1 SV=3	COPS5	11.3705	11.2748	11.151	11.1106	11.2919	11.3414	11.4234	11.7406	11.2434	10.8157	11.118	11.2124
O88545	>sp|O88545|CSN6_MOUSE COP9 signalosome complex subunit 6 OS=Mus musculus (Mouse) OX=10090 GN=Cops6 PE=1 SV=1	COPS6	11.5712	11.3371	11.4972	11.3221	11.1028	11.8061	11.6427	11.5259	11.3719	11.2966	11.2901	11.3291
Q9CZ04	>sp|Q9CZ04|CSN7A_MOUSE COP9 signalosome complex subunit 7a OS=Mus musculus (Mouse) OX=10090 GN=Cops7a PE=1 SV=2	COPS7A	12.1905	11.9304	12.1674	12.1367	12.1335	12.5595	12.2764	12.5425	11.8711	12.3896	12.0975	12.4217
Q8VBV7	>sp|Q8VBV7|CSN8_MOUSE COP9 signalosome complex subunit 8 OS=Mus musculus (Mouse) OX=10090 GN=Cops8 PE=1 SV=1	COPS8	11.4076	11.2957	11.2967	10.781	11.741	11.7237	11.6455	11.4914	11.3114	10.9518	11.327	11.7622
P61924	>sp|P61924|COPZ1_MOUSE Coatomer subunit zeta-1 OS=Mus musculus (Mouse) OX=10090 GN=Copz1 PE=1 SV=1	COPZ1	12.4143	11.9982	12.4337	12.081	12.6684	12.1411	12.2046	12.5625	12.2631	12.125	12.1591	12.5287
Q9JHH9	>sp|Q9JHH9|COPZ2_MOUSE Coatomer subunit zeta-2 OS=Mus musculus (Mouse) OX=10090 GN=Copz2 PE=1 SV=1	COPZ2	9.3922	9.23075	9.31817		9.29418	9.76105	9.28089	9.56426	9.76682	9.77237	9.60382	9.46283
E9Q3H6	>tr|E9Q3H6|E9Q3H6_MOUSE Polyketide_cyc domain-containing protein OS=Mus musculus (Mouse) OX=10090 GN=Coq10a PE=1 SV=1	COQ10A							11.0036	10.6882	11.6789		9.94894	9.5396
Q3THF9	>sp|Q3THF9|CQ10B_MOUSE Coenzyme Q-binding protein COQ10 homolog B, mitochondrial OS=Mus musculus (Mouse) OX=10090 GN=Coq10b PE=1 SV=1	COQ10B	12.0267	11.718	11.4369	12.2993	12.3691		12.1265	11.9884	11.9722	11.8691	11.7121	11.3171
Q8BMS4	>sp|Q8BMS4|COQ3_MOUSE Ubiquinone biosynthesis O-methyltransferase, mitochondrial OS=Mus musculus (Mouse) OX=10090 GN=Coq3 PE=1 SV=1	COQ3	10.976	11.4877	10.373	11.7185	10.8212	11.0121	10.4791	10.9909	10.8046	10.577	10.4952	10.7086
Q8BGB8	>sp|Q8BGB8|COQ4_MOUSE Ubiquinone biosynthesis protein COQ4 homolog, mitochondrial OS=Mus musculus (Mouse) OX=10090 GN=Coq4 PE=1 SV=1	COQ4	11.1471	11.3186	11.1031	10.6405	11.4182	11.7227	10.6994	11.3453	10.5384	10.1928	11.6024	10.7474
Q9CXI0	>sp|Q9CXI0|COQ5_MOUSE 2-methoxy-6-polyprenyl-1,4-benzoquinol methylase, mitochondrial OS=Mus musculus (Mouse) OX=10090 GN=Coq5 PE=1 SV=2	COQ5	11.0101	11.0529	11.0763	11.3077	10.9466	11.2394	11.0893	11.2472	11.1609	11.5376	11.0346	10.9476
Q8R1S0	>sp|Q8R1S0|COQ6_MOUSE Ubiquinone biosynthesis monooxygenase COQ6, mitochondrial OS=Mus musculus (Mouse) OX=10090 GN=Coq6 PE=1 SV=3	COQ6	10.225	10.6284	10.4122	10.7615	10.4746	11.0383	10.7143	10.7778	10.4379	10.8042	10.7024	10.5505
P97478	>sp|P97478|COQ7_MOUSE 5-demethoxyubiquinone hydroxylase, mitochondrial OS=Mus musculus (Mouse) OX=10090 GN=Coq7 PE=1 SV=3	COQ7	10.3822	10.4412	10.2198	11.0206	10.9485	11.0048	11.2003	10.8505	10.7932		11.1336	10.7428
Q60936	>sp|Q60936|COQ8A_MOUSE Atypical kinase COQ8A, mitochondrial OS=Mus musculus (Mouse) OX=10090 GN=Coq8a PE=1 SV=2	COQ8A	11.53	11.6673	11.6489	11.5429	11.325	11.098	11.6604	12.1739	12.3088	12.1421	11.8206	11.7325
Q566J8	>sp|Q566J8|COQ8B_MOUSE Atypical kinase COQ8B, mitochondrial OS=Mus musculus (Mouse) OX=10090 GN=Coq8b PE=1 SV=1	COQ8B	11.5898	11.8632	11.3147	11.3175	11.6609	11.2298	10.9682	11.0402	11.5522	10.6103	11.0668	11.3552
Q8K1Z0	>sp|Q8K1Z0|COQ9_MOUSE Ubiquinone biosynthesis protein COQ9, mitochondrial OS=Mus musculus (Mouse) OX=10090 GN=Coq9 PE=1 SV=1	COQ9	11.6804	12.0162	12.0709	11.9254	11.9155	11.7488	12.1507	12.0418	12.2549	12.3813	11.5212	12.0838
O89053	>sp|O89053|COR1A_MOUSE Coronin-1A OS=Mus musculus (Mouse) OX=10090 GN=Coro1a PE=1 SV=5	CORO1A							10.2695	9.28699	10.0719	9.67719	10.7137	9.56242
Q9WUM3	>sp|Q9WUM3|COR1B_MOUSE Coronin-1B OS=Mus musculus (Mouse) OX=10090 GN=Coro1b PE=1 SV=1	CORO1B	11.5377	11.4859	11.4657	11.3799	11.6458	12.0271	11.6027	11.5789	11.3514	11.8329	11.7696	11.7547
Q9WUM4	>sp|Q9WUM4|COR1C_MOUSE Coronin-1C OS=Mus musculus (Mouse) OX=10090 GN=Coro1c PE=1 SV=2	CORO1C	11.5916	11.821	11.5948	11.2741	11.1554	11.5663	10.7309	11.3244	11.4497	10.4327	11.1856	11.1439
Q9D2V7	>sp|Q9D2V7|CORO7_MOUSE Coronin-7 OS=Mus musculus (Mouse) OX=10090 GN=Coro7 PE=1 SV=2	CORO7	11.3326	10.2223	10.303		11.0614	10.014	10.323	10.0751	9.96698		10.2381	9.95365
Q8BH51	>sp|Q8BH51|COX14_MOUSE Cytochrome c oxidase assembly protein COX14 OS=Mus musculus (Mouse) OX=10090 GN=Cox14 PE=3 SV=1	COX14	11.5191		12.0132	12.7295	12.0462	11.9931	11.3174	11.4737	12.2516	13.1431	12.4839	11.5681
Q8BJ03	>sp|Q8BJ03|COX15_MOUSE Cytochrome c oxidase assembly protein COX15 homolog OS=Mus musculus (Mouse) OX=10090 GN=Cox15 PE=1 SV=1	COX15	11.198	11.3197	11.6475	11.3112	11.8085	11.226	11.3469	11.1118	11.781	11.7621	11.6481	11.6721
Q9CR63	>sp|Q9CR63|COX16_MOUSE Cytochrome c oxidase assembly protein COX16 homolog, mitochondrial OS=Mus musculus (Mouse) OX=10090 GN=Cox16 PE=3 SV=1	COX16							10.7284	10.7369	11.0155	11.6274	11.1941	10.7397
P56394	>sp|P56394|COX17_MOUSE Cytochrome c oxidase copper chaperone OS=Mus musculus (Mouse) OX=10090 GN=Cox17 PE=1 SV=2	COX17	10.9588	10.4501	10.3991	9.94238	11.2359	10.6296	11.3433	9.6709	11.199	11.0194	11.3826	10.7752
Q8VC74	>sp|Q8VC74|COX18_MOUSE Cytochrome c oxidase assembly protein COX18, mitochondrial OS=Mus musculus (Mouse) OX=10090 GN=Cox18 PE=1 SV=5	COX18	11.8302	11.6997	12.9484	12.5339	12.4373	12.0294	11.8078	11.7877	12.2314	12.705	12.4519	12.2072
Q9D7J4	>sp|Q9D7J4|COX20_MOUSE Cytochrome c oxidase assembly protein COX20, mitochondrial OS=Mus musculus (Mouse) OX=10090 GN=Cox20 PE=1 SV=1	COX20	12.0553	11.9155	12.0711	11.6731	11.9835	11.8688	11.9425	11.714	12.176	12.369	12.1925	12.2905
P19783	>sp|P19783|COX41_MOUSE Cytochrome c oxidase subunit 4 isoform 1, mitochondrial OS=Mus musculus (Mouse) OX=10090 GN=Cox4i1 PE=1 SV=2	COX4I1	14.5043	14.4731	14.5136	14.4351	14.3546	14.1667	14.2218	14.065	14.7438	14.9764	14.7641	14.5833
P12787	>sp|P12787|COX5A_MOUSE Cytochrome c oxidase subunit 5A, mitochondrial OS=Mus musculus (Mouse) OX=10090 GN=Cox5a PE=1 SV=2	COX5A	13.5968	13.7591	13.3766	13.3954	13.4181	13.3923	13.5826	13.4753	14.0596	14.0453	14.1292	14.1725
P19536	>sp|P19536|COX5B_MOUSE Cytochrome c oxidase subunit 5B, mitochondrial OS=Mus musculus (Mouse) OX=10090 GN=Cox5b PE=1 SV=1	COX5B	13.1463	13.2278	13.2265	13.5326	13.2951	13.183	13.1419	12.8245	13.5309	13.8815	13.7775	13.545
P43024	>sp|P43024|CX6A1_MOUSE Cytochrome c oxidase subunit 6A1, mitochondrial OS=Mus musculus (Mouse) OX=10090 GN=Cox6a1 PE=1 SV=2	COX6A1	12.9885	12.781	12.4271		12.6402	12.1129	12.7244	12.2368	13.5845	12.7131	12.3368	13.4366
P56391	>sp|P56391|CX6B1_MOUSE Cytochrome c oxidase subunit 6B1 OS=Mus musculus (Mouse) OX=10090 GN=Cox6b1 PE=1 SV=2	COX6B1	12.6535	12.981	12.2933	11.7153	12.5368	12.3248	12.5799	12.0208	13.3566	12.666	13.2723	13.0239
Q9CPQ1	>sp|Q9CPQ1|COX6C_MOUSE Cytochrome c oxidase subunit 6C OS=Mus musculus (Mouse) OX=10090 GN=Cox6c PE=1 SV=3	COX6C	13.3727	12.9903	13.843	12.5931	13.7487	13.3189	13.124	12.8847	13.6236	14.053	13.8459	13.602
P56392	>sp|P56392|CX7A1_MOUSE Cytochrome c oxidase subunit 7A1, mitochondrial OS=Mus musculus (Mouse) OX=10090 GN=Cox7a1 PE=1 SV=1	COX7A1							11.0898	9.62378	12.0522	11.8061	11.4617	11.1672
P48771	>sp|P48771|CX7A2_MOUSE Cytochrome c oxidase subunit 7A2, mitochondrial OS=Mus musculus (Mouse) OX=10090 GN=Cox7a2 PE=1 SV=2	COX7A2	11.8337	11.3661	11.974	11.8662	11.4124	12.1215	11.3432	11.14	12.4424	13.2109	12.5076	12.1416
Q61387	>sp|Q61387|COX7R_MOUSE Cytochrome c oxidase subunit 7A-related protein, mitochondrial OS=Mus musculus (Mouse) OX=10090 GN=Cox7a2l PE=1 SV=1	COX7A2L	12.0316	11.6937	11.7015	11.944	11.5861	11.5524	11.781	11.5681	12.0318	12.3349	12.143	11.9013
P17665	>sp|P17665|COX7C_MOUSE Cytochrome c oxidase subunit 7C, mitochondrial OS=Mus musculus (Mouse) OX=10090 GN=Cox7c PE=1 SV=1	COX7C	12.4619	12.2754	12.3562		12.2026	11.1598	12.0164	12.3703	12.5789	13.0433	12.7649	12.242
Q61147	>sp|Q61147|CERU_MOUSE Ceruloplasmin OS=Mus musculus (Mouse) OX=10090 GN=Cp PE=1 SV=2	CP	12.1498	12.3125	11.7437	11.7152	11.8046	11.6326	11.0691	11.2124	10.6896	11.1083	11.2375	10.6321
P15089	>sp|P15089|CBPA3_MOUSE Mast cell carboxypeptidase A OS=Mus musculus (Mouse) OX=10090 GN=Cpa3 PE=2 SV=1	CPA3		11.7848	11.2768	12.0947	12.011	11.4395
Q6P8K8	>sp|Q6P8K8|CBPA4_MOUSE Carboxypeptidase A4 OS=Mus musculus (Mouse) OX=10090 GN=Cpa4 PE=2 SV=2	CPA4	12.6288	12.835	13.3479	12.7033	12.8842	12.717	12.498	12.4867	12.2307	11.9963	12.531
Q00493	>sp|Q00493|CBPE_MOUSE Carboxypeptidase E OS=Mus musculus (Mouse) OX=10090 GN=Cpe PE=1 SV=2	CPE	11.1918	11.3542	11.2891	11.6351	11.1266	11.3507	11.4972	11.68	11.1764	11.7441	11.5101	11.3599
Q80V42	>sp|Q80V42|CBPM_MOUSE Carboxypeptidase M OS=Mus musculus (Mouse) OX=10090 GN=Cpm PE=1 SV=2	CPM	11.4897	11.2467	11.4682	11.3558	11.0586	10.6224	11.0639	10.7209	11.0516	10.1831	11.2545	10.87
Q8C166	>sp|Q8C166|CPNE1_MOUSE Copine-1 OS=Mus musculus (Mouse) OX=10090 GN=Cpne1 PE=1 SV=1	CPNE1	11.604	11.3109	11.8557	11.8435	11.394	11.894	11.4051	11.6806	11.3449	11.3411	11.6851	11.4142
P59108;Q8BT60	>sp|P59108|CPNE2_MOUSE Copine-2 OS=Mus musculus (Mouse) OX=10090 GN=Cpne2 PE=1 SV=1;>sp|Q8BT60|CPNE3_MOUSE Copine-3 OS=Mus musculus (Mouse) OX=10090 GN=Cpne3 PE=1 SV=2	CPNE2;CPNE3	13.7105	13.6572	12.6332	12.4375	13.0612	12.8897	13.295	13.6392	13.255	12.3875	12.0699	12.9247
Q8BT60	>sp|Q8BT60|CPNE3_MOUSE Copine-3 OS=Mus musculus (Mouse) OX=10090 GN=Cpne3 PE=1 SV=2	CPNE3	12.3099	11.9169	12.176	12.0157	12.1415	12.473	12.1943	11.918	11.8483	12.0469	11.4274	11.8704
Q8BT60;Q8C166	>sp|Q8BT60|CPNE3_MOUSE Copine-3 OS=Mus musculus (Mouse) OX=10090 GN=Cpne3 PE=1 SV=2;>sp|Q8C166|CPNE1_MOUSE Copine-1 OS=Mus musculus (Mouse) OX=10090 GN=Cpne1 PE=1 SV=1	CPNE3;CPNE1	13.2637	13.0937	13.2179	12.72	13.078	13.5706	12.7825	13.0498	12.8493	11.8107	12.4269	12.0629
P36552	>sp|P36552|HEM6_MOUSE Oxygen-dependent coproporphyrinogen-III oxidase, mitochondrial OS=Mus musculus (Mouse) OX=10090 GN=Cpox PE=1 SV=2	CPOX	11.7216	11.9492	11.8874	11.6226	11.6332	11.468	11.9355	12.0264	11.8636	11.6341	11.7659	11.8153
Q9WVJ3	>sp|Q9WVJ3|CBPQ_MOUSE Carboxypeptidase Q OS=Mus musculus (Mouse) OX=10090 GN=Cpq PE=1 SV=1	CPQ	12.4155	12.2508	12.3659	12.6792	12.7059	12.2919	12.4271	12.6878	12.0584	11.9147	12.4437	12.2984
Q9EPU4	>sp|Q9EPU4|CPSF1_MOUSE Cleavage and polyadenylation specificity factor subunit 1 OS=Mus musculus (Mouse) OX=10090 GN=Cpsf1 PE=1 SV=1	CPSF1	11.4206	10.6246	11.013	10.8142	10.4974	10.6499	10.9527	11.1661	10.8366	10.7026	10.8133	10.4951
O35218	>sp|O35218|CPSF2_MOUSE Cleavage and polyadenylation specificity factor subunit 2 OS=Mus musculus (Mouse) OX=10090 GN=Cpsf2 PE=1 SV=1	CPSF2	9.47311	8.82134	10.5731	9.98749	9.62731	10.1911	10.5007	11.366	10.886		11.8226	11.2577
Q9QXK7	>sp|Q9QXK7|CPSF3_MOUSE Cleavage and polyadenylation specificity factor subunit 3 OS=Mus musculus (Mouse) OX=10090 GN=Cpsf3 PE=1 SV=2	CPSF3	11.0078	10.5183	11.0019	11.2836	10.9053	11.3966	11.2513	10.8207	10.707	11.4024	11.418	10.6508
Q6NVF9	>sp|Q6NVF9|CPSF6_MOUSE Cleavage and polyadenylation specificity factor subunit 6 OS=Mus musculus (Mouse) OX=10090 GN=Cpsf6 PE=1 SV=1	CPSF6	11.6936	11.6778	11.4532	12.3927	11.8842	12.2194	12.1228	12.1209	11.8558	12.2057	12.0632	12.0322
Q8BTV2	>sp|Q8BTV2|CPSF7_MOUSE Cleavage and polyadenylation specificity factor subunit 7 OS=Mus musculus (Mouse) OX=10090 GN=Cpsf7 PE=1 SV=2	CPSF7	11.1927	10.6671	11.4192	11.7091	11.039	11.4011	11.2255	11.0659	10.7664	11.132	11.0859	10.9344
P97742	>sp|P97742|CPT1A_MOUSE Carnitine O-palmitoyltransferase 1, liver isoform OS=Mus musculus (Mouse) OX=10090 GN=Cpt1a PE=1 SV=4	CPT1A	12.6187	12.8933	12.8432	12.9165	12.9176	12.6523	12.6512	12.5129	12.8345	12.8102	12.7499	12.9419
P52825	>sp|P52825|CPT2_MOUSE Carnitine O-palmitoyltransferase 2, mitochondrial OS=Mus musculus (Mouse) OX=10090 GN=Cpt2 PE=1 SV=2	CPT2	12.5969	12.9135	13.1103	13.1147	13.0237	12.6255	12.7937	12.6807	12.9738	13.0623	12.9755	13.0031
Q64735	>sp|Q64735|CR1L_MOUSE Complement component receptor 1-like protein OS=Mus musculus (Mouse) OX=10090 GN=Cr1l PE=1 SV=1	CR1L	10.4702	10.4932	11.7129	11.3725	10.8432	11.0758	10.4895	9.99739	10.0558	10.859	10.5167	10.5414
P47934	>sp|P47934|CACP_MOUSE Carnitine O-acetyltransferase OS=Mus musculus (Mouse) OX=10090 GN=Crat PE=1 SV=3	CRAT	11.1237	11.0433	11.1167	11.3332	11.0994	10.9401	10.9707	11.1583	11.1191	11.1119	11.2639	10.9699
Q01147	>sp|Q01147|CREB1_MOUSE Cyclic AMP-responsive element-binding protein 1 OS=Mus musculus (Mouse) OX=10090 GN=Creb1 PE=1 SV=1	CREB1	10.6331	10.4032	10.2827	10.6005	10.0884	10.5949	10.5342	10.6449	10.7002	10.9372	10.6213	10.6639
O88668	>sp|O88668|CREG1_MOUSE Protein CREG1 OS=Mus musculus (Mouse) OX=10090 GN=Creg1 PE=1 SV=1	CREG1	10.5942	10.6957	10.3459	10.1904	10.9321	10.8132	10.7065	10.46	10.5434	9.72661	10.6522	10.7933
Q91XD7	>sp|Q91XD7|CREL1_MOUSE Protein disulfide isomerase Creld1 OS=Mus musculus (Mouse) OX=10090 GN=Creld1 PE=1 SV=1	CRELD1	11.7805	11.2115	12.6207	12.7326	12.4865	12.4976	11.444	11.3742	11.9537	12.3612	12.1019	11.8889
Q9CYA0	>sp|Q9CYA0|CREL2_MOUSE Protein disulfide isomerase Creld2 OS=Mus musculus (Mouse) OX=10090 GN=Creld2 PE=1 SV=1	CRELD2	10.2181	11.2873	11.4008	10.3704	10.5254	11.1732	11.0991	10.2934	10.6341	11.3239	11.3418	11.0045
Q64010	>sp|Q64010|CRK_MOUSE Adapter molecule crk OS=Mus musculus (Mouse) OX=10090 GN=Crk PE=1 SV=1	CRK	11.8812	11.7514	11.7724	11.7954	11.4852	11.8686	11.6039	11.9583	11.5548	11.5697	11.359	11.7156
P47941	>sp|P47941|CRKL_MOUSE Crk-like protein OS=Mus musculus (Mouse) OX=10090 GN=Crkl PE=1 SV=2	CRKL	11.5607	11.5094	11.2361	11.6085	11.6239	11.2871	11.419	11.8904	11.5398	11.6496	11.4684	11.3595
Q80ZM8	>sp|Q80ZM8|CRLS1_MOUSE Cardiolipin synthase (CMP-forming) OS=Mus musculus (Mouse) OX=10090 GN=Crls1 PE=1 SV=1	CRLS1	10.7602	11.3464	11.5088	10.5567	11.0636	10.3221	10.9934	10.7327	11.3483	11.3507	11.9516	11.2859
P63154	>sp|P63154|CRNL1_MOUSE Crooked neck-like protein 1 OS=Mus musculus (Mouse) OX=10090 GN=Crnkl1 PE=1 SV=1	CRNKL1	11.1244	10.8229	10.9561	10.164	10.3841	10.8769	10.4423	10.7283	10.3091	10.6921	10.9378	11.2828
Q9DC50	>sp|Q9DC50|OCTC_MOUSE Peroxisomal carnitine O-octanoyltransferase OS=Mus musculus (Mouse) OX=10090 GN=Crot PE=1 SV=1	CROT	9.95147	10.3816		10.6858	9.68895	9.50036	10.4389	9.71283	10.585	10.8218		10.2579
Q9CYD3	>sp|Q9CYD3|CRTAP_MOUSE Cartilage-associated protein OS=Mus musculus (Mouse) OX=10090 GN=Crtap PE=1 SV=3	CRTAP	11.2393	11.0572	11.4634	11.4182	11.2022	11.0666	10.7884	10.7508	10.4682	10.8089	10.9218	10.704
Q99KP3	>sp|Q99KP3|CRYL1_MOUSE Lambda-crystallin homolog OS=Mus musculus (Mouse) OX=10090 GN=Cryl1 PE=1 SV=3	CRYL1							9.33758	10.034	10.0585	10.1243		9.90174
P47199	>sp|P47199|QOR_MOUSE Quinone oxidoreductase OS=Mus musculus (Mouse) OX=10090 GN=Cryz PE=1 SV=1	CRYZ	11.7801	11.876	12.103	11.9971	12.1542	12.0179	11.7793	12.1432	12.0264	11.9281	12.3485	12.1817
Q921W4	>sp|Q921W4|QORL1_MOUSE Quinone oxidoreductase-like protein 1 OS=Mus musculus (Mouse) OX=10090 GN=Cryzl1 PE=1 SV=1	CRYZL1	11.0364	10.5981	9.98767		9.71877	9.54208	10.5117	10.4519	10.0691	9.93205		9.24075
Q3UNZ8	>sp|Q3UNZ8|QORL2_MOUSE Quinone oxidoreductase-like protein 2 OS=Mus musculus (Mouse) OX=10090 GN=Cryzl2 PE=1 SV=1	CRYZL2	12.1891	12.5676	12.8383	12.6702	12.8311	12.3506	12.4545	12.2471	12.9162	12.6497	12.8264	12.8309
Q9CZU6	>sp|Q9CZU6|CISY_MOUSE Citrate synthase, mitochondrial OS=Mus musculus (Mouse) OX=10090 GN=Cs PE=1 SV=1	CS	13.7767	13.918	14.0441	14.3567	14.4513	14.1575	14.0276	13.8296	14.0568	14.2568	14.3641	14.3405
Q9DBE0	>sp|Q9DBE0|CSAD_MOUSE Cysteine sulfinic acid decarboxylase OS=Mus musculus (Mouse) OX=10090 GN=Csad PE=1 SV=1	CSAD	11.6486	11.1471	11.9701	11.9865	11.6297	12.2724	11.757	12.0335	11.648	11.7072	11.7741	11.7255
Q91W50	>sp|Q91W50|CSDE1_MOUSE Cold shock domain-containing protein E1 OS=Mus musculus (Mouse) OX=10090 GN=Csde1 PE=1 SV=1	CSDE1	11.5162	11.079	11.4141	11.2883	11.1214	11.6437	11.2856	11.4511	11.013	11.3626	11.3686	11.1085
Q9ERK4	>sp|Q9ERK4|XPO2_MOUSE Exportin-2 OS=Mus musculus (Mouse) OX=10090 GN=Cse1l PE=1 SV=1	CSE1L	11.5674	11.5465	11.4688	11.4637	11.3448	11.5673	11.644	11.8563	11.5164	11.2264	11.6072	11.5935
Q00941	>sp|Q00941|CSF2R_MOUSE Granulocyte-macrophage colony-stimulating factor receptor subunit alpha OS=Mus musculus (Mouse) OX=10090 GN=Csf2ra PE=2 SV=2	CSF2RA	12.9666	12.9894	13.5037	13.596	13.333	12.9739	13.0389	12.9483	13.3479	13.6054	13.2258	13.4067
P41241	>sp|P41241|CSK_MOUSE Tyrosine-protein kinase CSK OS=Mus musculus (Mouse) OX=10090 GN=Csk PE=1 SV=2	CSK	11.2644	10.816	11.5811	11.4463	10.9667	11.5882	11.357	11.6241	11.378	11.213	11.6736	11.5747
Q80X68	>tr|Q80X68|Q80X68_MOUSE Citrate synthase OS=Mus musculus (Mouse) OX=10090 GN=Csl PE=1 SV=1	CSL	11.2608	11.8194	11.4028	12.4937	11.6592	11.3562	11.9051	11.0857	11.9589	12.278	12.6868
Q8BK63	>sp|Q8BK63|KC1A_MOUSE Casein kinase I isoform alpha OS=Mus musculus (Mouse) OX=10090 GN=Csnk1a1 PE=1 SV=2	CSNK1A1	10.4857	10.7141	11.2431	10.819	11.1213	10.7621	11.347	10.3679	11.5344		11.241	10.7519
Q8BVP5;Q8C4X2	>sp|Q8BVP5|KC1G2_MOUSE Casein kinase I isoform gamma-2 OS=Mus musculus (Mouse) OX=10090 GN=Csnk1g2 PE=1 SV=1;>sp|Q8C4X2|KC1G3_MOUSE Casein kinase I isoform gamma-3 OS=Mus musculus (Mouse) OX=10090 GN=Csnk1g3 PE=1 SV=2	CSNK1G2;CSNK1G3	10.5102	10.383		10.886	10.1428	10.9815	10.4727	10.4105	10.5459		11.0583	10.1464
Q60737	>sp|Q60737|CSK21_MOUSE Casein kinase II subunit alpha OS=Mus musculus (Mouse) OX=10090 GN=Csnk2a1 PE=1 SV=2	CSNK2A1	11.6262	11.4824	11.5712	11.3891	11.2751	11.2258	11.2358	11.535	11.4067	10.7589	11.0791	10.9864
O54833	>sp|O54833|CSK22_MOUSE Casein kinase II subunit alpha' OS=Mus musculus (Mouse) OX=10090 GN=Csnk2a2 PE=1 SV=1	CSNK2A2	9.98559	10.5868	10.9387	10.0659	10.6758	10.151	12.0074	11.371	11.7361	11.479	11.5384	11.8857
P67871	>sp|P67871|CSK2B_MOUSE Casein kinase II subunit beta OS=Mus musculus (Mouse) OX=10090 GN=Csnk2b PE=1 SV=1	CSNK2B	11.9185	11.6491		11.8767	10.9405	12.0262	11.3974	10.9379	11.4935	11.9145	11.3725	11.2242
P97315	>sp|P97315|CSRP1_MOUSE Cysteine and glycine-rich protein 1 OS=Mus musculus (Mouse) OX=10090 GN=Csrp1 PE=1 SV=3	CSRP1	13.1222	12.8768	12.4187	11.9648	12.2105	11.7952	11.8429	11.4102	10.8458	10.3788	10.9378	11.3602
P21460	>sp|P21460|CYTC_MOUSE Cystatin-C OS=Mus musculus (Mouse) OX=10090 GN=Cst3 PE=1 SV=2	CST3							9.95308	9.49909	10.6707	10.1475		10.4904
Q62426	>sp|Q62426|CYTB_MOUSE Cystatin-B OS=Mus musculus (Mouse) OX=10090 GN=Cstb PE=1 SV=1	CSTB	12.086	11.382	11.7876	11.9384	12.2579	11.5026	11.1827	11.4807	11.7579	12.5799	12.0788	11.9998
Q8BIQ5	>sp|Q8BIQ5|CSTF2_MOUSE Cleavage stimulation factor subunit 2 OS=Mus musculus (Mouse) OX=10090 GN=Cstf2 PE=1 SV=2	CSTF2	11.1775	10.7785	11.7071	10.8703	11.423	12.0189	11.4899	11.2325	11.3478	11.8554	10.9844	11.4852
Q99LI7	>sp|Q99LI7|CSTF3_MOUSE Cleavage stimulation factor subunit 3 OS=Mus musculus (Mouse) OX=10090 GN=Cstf3 PE=1 SV=1	CSTF3	10.1536	10.4444	10.4866	10.7736	10.2573	10.3183	10.6304	10.4067	10.4803	9.69495	11.315	10.6864
O88712	>sp|O88712|CTBP1_MOUSE C-terminal-binding protein 1 OS=Mus musculus (Mouse) OX=10090 GN=Ctbp1 PE=1 SV=2	CTBP1	11.5678	11.5343	11.6549	11.8181	11.8184	12.2473	11.7906	11.9288	11.5233	11.9365	11.6814	11.539
O88712;P56546	>sp|O88712|CTBP1_MOUSE C-terminal-binding protein 1 OS=Mus musculus (Mouse) OX=10090 GN=Ctbp1 PE=1 SV=2;>sp|P56546|CTBP2_MOUSE C-terminal-binding protein 2 OS=Mus musculus (Mouse) OX=10090 GN=Ctbp2 PE=1 SV=2	CTBP1;CTBP2	13.1376	13.2157	13.1304	13.312	12.9039	13.3306	13.2348	13.0017	12.9511	13.2865	13.1616	13.3354
P56546	>sp|P56546|CTBP2_MOUSE C-terminal-binding protein 2 OS=Mus musculus (Mouse) OX=10090 GN=Ctbp2 PE=1 SV=2	CTBP2	11.4269	10.9866	11.5097	11.4924	11.7784	11.8298	11.3804	11.3155	11.1607	11.4644	11.5228	11.3198
Q8R242	>sp|Q8R242|DIAC_MOUSE Di-N-acetylchitobiase OS=Mus musculus (Mouse) OX=10090 GN=Ctbs PE=1 SV=2	CTBS	10.9162	11.0917	11.1129	10.3768	11.5557	11.035	10.8623	10.9923	10.8586	11.0654	11.3567	11.0051
Q5SUQ9	>sp|Q5SUQ9|CTC1_MOUSE CST complex subunit CTC1 OS=Mus musculus (Mouse) OX=10090 GN=Ctc1 PE=1 SV=2	CTC1	9.85845	10.5143		9.91566	10.2764	9.33935	10.2611	10.0109	10.2189	11.0218		10.3437
Q61164	>sp|Q61164|CTCF_MOUSE Transcriptional repressor CTCF OS=Mus musculus (Mouse) OX=10090 GN=Ctcf PE=1 SV=2	CTCF	10.86	10.6165	11.1914	10.2081	10.4807	10.9261	10.7882	10.4613	10.4724	10.7251	10.8979	10.5837
Q3TP92	>sp|Q3TP92|CNEP1_MOUSE CTD nuclear envelope phosphatase 1 OS=Mus musculus (Mouse) OX=10090 GN=Ctdnep1 PE=1 SV=2	CTDNEP1	12.257	12.4861	11.8301	12.4933	12.5487	11.5042	11.3349	11.5723	12.236		11.6376	12.1324
P58466	>sp|P58466|CTDS1_MOUSE Carboxy-terminal domain RNA polymerase II polypeptide A small phosphatase 1 OS=Mus musculus (Mouse) OX=10090 GN=Ctdsp1 PE=1 SV=1	CTDSP1	10.926	11.5252	11.3372	10.5833	10.9198	11.4255	10.8884	11.0715	10.4427	11.855	10.9151	10.7482
Q8VCN5	>sp|Q8VCN5|CGL_MOUSE Cystathionine gamma-lyase OS=Mus musculus (Mouse) OX=10090 GN=Cth PE=1 SV=1	CTH	10.8739	10.5622		9.47977	10.5957	10.0971	10.3831	10.5918	10.1791	10.8749	10.1716	10.4551
P26231	>sp|P26231|CTNA1_MOUSE Catenin alpha-1 OS=Mus musculus (Mouse) OX=10090 GN=Ctnna1 PE=1 SV=1	CTNNA1	12.1146	12.2981	12.0356	12.1651	11.9333	12.012	12.119	12.1583	11.8905	11.7671	11.8223	11.8409
P26231;Q61301	>sp|P26231|CTNA1_MOUSE Catenin alpha-1 OS=Mus musculus (Mouse) OX=10090 GN=Ctnna1 PE=1 SV=1;>sp|Q61301|CTNA2_MOUSE Catenin alpha-2 OS=Mus musculus (Mouse) OX=10090 GN=Ctnna2 PE=1 SV=3	CTNNA1;CTNNA2	12.2651	12.7102	12.2336	12.2668	12.4262	12.6053	12.665	12.4774	12.2735	11.7161	12.2211	12.4062
Q61301	>sp|Q61301|CTNA2_MOUSE Catenin alpha-2 OS=Mus musculus (Mouse) OX=10090 GN=Ctnna2 PE=1 SV=3	CTNNA2	12.2772	12.8566	11.4645		11.0983	11.8689	12.6049	12.234	11.9847	11.8011	11.4766	11.4516
Q02248	>sp|Q02248|CTNB1_MOUSE Catenin beta-1 OS=Mus musculus (Mouse) OX=10090 GN=Ctnnb1 PE=1 SV=1	CTNNB1	11.1443	11.0137	11.2478	11.2017	11.0754	11.1605	11.5318	11.2851	11.0092	11.2534	11.0455	11.1369
Q02248;Q02257	>sp|Q02248|CTNB1_MOUSE Catenin beta-1 OS=Mus musculus (Mouse) OX=10090 GN=Ctnnb1 PE=1 SV=1;>sp|Q02257|PLAK_MOUSE Junction plakoglobin OS=Mus musculus (Mouse) OX=10090 GN=Jup PE=1 SV=3	CTNNB1;JUP	12.6221	12.6772	12.3057	12.5638	12.3235	12.7077	12.563	12.5985	12.3348	12.0741	12.1922	12.2782
Q9CWL8	>sp|Q9CWL8|CTBL1_MOUSE Beta-catenin-like protein 1 OS=Mus musculus (Mouse) OX=10090 GN=Ctnnbl1 PE=1 SV=1	CTNNBL1	11.311	11.2043	11.0529	10.5099	10.5876	11.1079	11.1451	10.8837	11.0556	9.6535	10.6202	10.5845
P30999	>sp|P30999|CTND1_MOUSE Catenin delta-1 OS=Mus musculus (Mouse) OX=10090 GN=Ctnnd1 PE=1 SV=2	CTNND1	12.4205	12.1312	12.4701	12.3325	12.234	12.4898	12.5014	12.2756	12.0661	12.1403	12.0905	12.1589
P70698	>sp|P70698|PYRG1_MOUSE CTP synthase 1 OS=Mus musculus (Mouse) OX=10090 GN=Ctps1 PE=1 SV=2	CTPS1	11.5309	11.4632	11.4777	11.3852	11.3726	11.776	10.6426	11.1697	11.1539	11.1777	11.2131	11.0012
P70303	>sp|P70303|PYRG2_MOUSE CTP synthase 2 OS=Mus musculus (Mouse) OX=10090 GN=Ctps2 PE=1 SV=1	CTPS2	10.8738	11.0195	11.1242	11.3144	11.2309	10.9301	10.704	11.0827	10.7815	10.3775	10.7542	10.7596
P70303;P70698	>sp|P70303|PYRG2_MOUSE CTP synthase 2 OS=Mus musculus (Mouse) OX=10090 GN=Ctps2 PE=1 SV=1;>sp|P70698|PYRG1_MOUSE CTP synthase 1 OS=Mus musculus (Mouse) OX=10090 GN=Ctps1 PE=1 SV=2	CTPS2;CTPS1	11.1246	10.5711	12.0933	11.8747	11.1751	11.478	10.3455	10.7966	10.1375	11.3044	10.5735	10.2967
P16675	>sp|P16675|PPGB_MOUSE Lysosomal protective protein OS=Mus musculus (Mouse) OX=10090 GN=Ctsa PE=1 SV=1	CTSA	12.0127	11.4656	11.875	11.9161	12.1299	11.6939	11.9836	12.0333	11.7889	11.9876	11.8528	12.0191
P10605	>sp|P10605|CATB_MOUSE Cathepsin B OS=Mus musculus (Mouse) OX=10090 GN=Ctsb PE=1 SV=2	CTSB	12.7022	12.7098	12.6674	12.6905	12.967	12.7027	12.2345	12.3154	12.2826	12.4225	12.4945	12.5967
P97821	>sp|P97821|CATC_MOUSE Dipeptidyl peptidase 1 OS=Mus musculus (Mouse) OX=10090 GN=Ctsc PE=1 SV=1	CTSC	12.2245	12.1329	12.2147	11.8801	12.6755	12.0099	11.9676	11.6439	12.0207	12.0926	11.8485	11.8467
P18242	>sp|P18242|CATD_MOUSE Cathepsin D OS=Mus musculus (Mouse) OX=10090 GN=Ctsd PE=1 SV=1	CTSD	13.4233	13.2295	13.3218	13.5952	13.5603	13.3801	13.7217	13.8139	13.9127	14.1681	14.0609	13.9133
Q9R013	>sp|Q9R013|CATF_MOUSE Cathepsin F OS=Mus musculus (Mouse) OX=10090 GN=Ctsf PE=1 SV=1	CTSF	12.3895	12.9803	12.9671	12.807	13.016	13.2504	13.475	13.3444	13.2999	12.9742	13.1665	13.6455
P49935	>sp|P49935|CATH_MOUSE Pro-cathepsin H OS=Mus musculus (Mouse) OX=10090 GN=Ctsh PE=1 SV=2	CTSH	13.2954	13.4044	13.0847	13.3407	13.3967	13.1451	13.3862	13.6166	13.4603	12.9574	12.9864	13.1362
P06797	>sp|P06797|CATL1_MOUSE Cathepsin L1 OS=Mus musculus (Mouse) OX=10090 GN=Ctsl PE=1 SV=2	CTSL	10.6413	10.2431	10.9588	10.4194	10.9594	10.7139
Q8BM88	>sp|Q8BM88|CATO_MOUSE Cathepsin O OS=Mus musculus (Mouse) OX=10090 GN=Ctso PE=2 SV=1	CTSO	10.5147	10.7442	11.6545	12.1123	11.3087	11.6295	11.2206	11.4943	11.2515	11.9287	11.6899	11.4923
O70370	>sp|O70370|CATS_MOUSE Cathepsin S OS=Mus musculus (Mouse) OX=10090 GN=Ctss PE=1 SV=2	CTSS	10.676	10.8433	10.3391		11.492	10.9606	10.9852	11.355	10.7826	10.7409	10.502	10.5642
Q9WUU7	>sp|Q9WUU7|CATZ_MOUSE Cathepsin Z OS=Mus musculus (Mouse) OX=10090 GN=Ctsz PE=1 SV=1	CTSZ	12.2524	12.1998	12.8392	12.5743	12.7676	12.8209	12.2739	12.0247	11.7524	12.0641	12.1942	12.1432
Q60598	>sp|Q60598|SRC8_MOUSE Src substrate cortactin OS=Mus musculus (Mouse) OX=10090 GN=Cttn PE=1 SV=2	CTTN	12.3118	12.0128	11.9513	12.3001	12.0531	12.1374	12.2829	12.2821	12.0086	12.165	12.3191	12.1722
B9EJA2	>sp|B9EJA2|CTTB2_MOUSE Cortactin-binding protein 2 OS=Mus musculus (Mouse) OX=10090 GN=Cttnbp2 PE=1 SV=2	CTTNBP2	10.101	9.09202	10.5174	9.98385	9.72864	10.3426	11.1029	10.8856	10.4251	10.9788	11.0113	10.6935
Q9WTX6	>sp|Q9WTX6|CUL1_MOUSE Cullin-1 OS=Mus musculus (Mouse) OX=10090 GN=Cul1 PE=1 SV=1	CUL1	11.1487	10.6678	10.4933	11.0813	10.829	10.7804	11.0075	11.119	10.7953	11.0456	10.4907	10.6285
Q9D4H8	>sp|Q9D4H8|CUL2_MOUSE Cullin-2 OS=Mus musculus (Mouse) OX=10090 GN=Cul2 PE=1 SV=2	CUL2	10.6297	10.4872	10.6121	10.7772	10.6002	10.7257	10.5231	10.5501	10.6561	10.4802	10.5881	10.6943
Q9JLV5	>sp|Q9JLV5|CUL3_MOUSE Cullin-3 OS=Mus musculus (Mouse) OX=10090 GN=Cul3 PE=1 SV=1	CUL3	11.0995	11.0722	10.6862	10.9064	10.9533	11.1217	11.1524	10.9376	10.5728	10.9649	10.5969	10.7037
Q3TCH7	>sp|Q3TCH7|CUL4A_MOUSE Cullin-4A OS=Mus musculus (Mouse) OX=10090 GN=Cul4a PE=1 SV=1	CUL4A	11.9117	11.5274	11.8132	11.4265	11.5029	11.515	11.8854	12.0963	11.0818	12.0746	11.7653	11.8235
A2A432	>sp|A2A432|CUL4B_MOUSE Cullin-4B OS=Mus musculus (Mouse) OX=10090 GN=Cul4b PE=1 SV=1	CUL4B	10.8528	10.714	11.1014	11.0743	10.9575	11.3969	10.7004	10.8608	10.6504	11.0408	10.6861	10.6526
A2A432;Q3TCH7	>sp|A2A432|CUL4B_MOUSE Cullin-4B OS=Mus musculus (Mouse) OX=10090 GN=Cul4b PE=1 SV=1;>sp|Q3TCH7|CUL4A_MOUSE Cullin-4A OS=Mus musculus (Mouse) OX=10090 GN=Cul4a PE=1 SV=1	CUL4B;CUL4A	11.6081	11.9964	11.7422	11.3853	11.803	11.7475	12.0676	12.1513	11.8527	11.3176	12.1334	11.7057
Q9D5V5	>sp|Q9D5V5|CUL5_MOUSE Cullin-5 OS=Mus musculus (Mouse) OX=10090 GN=Cul5 PE=1 SV=3	CUL5	11.01	10.6975	11.1157	11.0897	11.2608	11.4894	11.1746	10.8129	10.7697	11.0411	10.8368	10.9919
Q3UY34	>sp|Q3UY34|CSTOS_MOUSE Protein CUSTOS OS=Mus musculus (Mouse) OX=10090 GN=Custos PE=2 SV=1	CUSTOS	9.59834	8.95827	10.3282	10.5179	9.98914	10.491	10.0082	9.94244	9.30332	9.99523		10.1071
Q3TKY6	>sp|Q3TKY6|CWC27_MOUSE Spliceosome-associated protein CWC27 homolog OS=Mus musculus (Mouse) OX=10090 GN=Cwc27 PE=1 SV=1	CWC27	10.5397	9.98197	9.63846	10.5976	9.47875	9.39345	10.4025	10.5823	9.93439		9.88318	10.0115
Q8CI33	>sp|Q8CI33|C19L1_MOUSE CWF19-like protein 1 OS=Mus musculus (Mouse) OX=10090 GN=Cwf19l1 PE=1 SV=2	CWF19L1	11.6257	11.1959		10.039	10.8025	11.1872	10.8782	11.1957	11.2995	11.339	11.5746	10.6151
Q9WUE3	>sp|Q9WUE3|C56D2_MOUSE Cytochrome b561 domain-containing protein 2 OS=Mus musculus (Mouse) OX=10090 GN=Cyb561d2 PE=1 SV=1	CYB561D2	9.22228	9.49757	10.5512	10.1873	10.4403	10.4245	9.22164	8.85231	9.96596	10.46		10.132
P56395	>sp|P56395|CYB5_MOUSE Cytochrome b5 OS=Mus musculus (Mouse) OX=10090 GN=Cyb5a PE=1 SV=2	CYB5A	14.0596	14.0828	14.4604	14.0335	14.4016	13.9802	13.8843	13.6592	14.0996	14.5199	14.4912	14.2572
Q9CQX2	>sp|Q9CQX2|CYB5B_MOUSE Cytochrome b5 type B OS=Mus musculus (Mouse) OX=10090 GN=Cyb5b PE=1 SV=1	CYB5B	15.1158	15.2175	15.6702	15.4785	15.6554	15.5106	15.5498	15.0383	15.3726	15.55	15.6209	15.5212
Q5SSH8	>sp|Q5SSH8|NEUFC_MOUSE Neuferricin OS=Mus musculus (Mouse) OX=10090 GN=Cyb5d2 PE=1 SV=1	CYB5D2	11.6493	11.6903	11.7597	11.7358	11.8563	12.1211	11.5971	11.6653	11.8304	11.4182	11.3971	11.5963
Q9DB73	>sp|Q9DB73|NB5R1_MOUSE NADH-cytochrome b5 reductase 1 OS=Mus musculus (Mouse) OX=10090 GN=Cyb5r1 PE=1 SV=1	CYB5R1	11.9337	12.265	12.265	12.5306	12.6751	12.0442	12.5091	12.0439	12.7497	12.8508	12.6583	12.8058
Q9DCN2	>sp|Q9DCN2|NB5R3_MOUSE NADH-cytochrome b5 reductase 3 OS=Mus musculus (Mouse) OX=10090 GN=Cyb5r3 PE=1 SV=3	CYB5R3	12.8113	13.2104	13.5442	13.5706	13.669	13.0896	12.9792	12.4587	13.3791	13.3532	13.2874	13.3582
Q3TYS2	>sp|Q3TYS2|CYBC1_MOUSE Cytochrome b-245 chaperone 1 OS=Mus musculus (Mouse) OX=10090 GN=Cybc1 PE=1 SV=2	CYBC1	11.2988	11.2602	10.7078	11.0084	11.8318	11.3904	10.4111	10.5735	10.9713	10.8301	10.7425	10.8982
Q9D0M3	>sp|Q9D0M3|CY1_MOUSE Cytochrome c1, heme protein, mitochondrial OS=Mus musculus (Mouse) OX=10090 GN=Cyc1 PE=1 SV=1	CYC1	13.5801	13.6851	13.7808	13.8499	13.9428	13.432	13.7502	13.4695	13.979	13.769	14.0067	13.8844
P62897	>sp|P62897|CYC_MOUSE Cytochrome c, somatic OS=Mus musculus (Mouse) OX=10090 GN=Cycs PE=1 SV=2	CYCS	12.8803	12.7218	12.7288	12.4855	12.9788	12.4683	12.7781	12.4917	13.107	13.4247	13.299	13.0051
Q7TMB8	>sp|Q7TMB8|CYFP1_MOUSE Cytoplasmic FMR1-interacting protein 1 OS=Mus musculus (Mouse) OX=10090 GN=Cyfip1 PE=1 SV=1	CYFIP1	11.1347	11.2795	10.6023	10.7265	10.7477	10.7873	10.6458	10.8323	10.5362	10.4423	10.8343	10.3195
Q5SQX6	>sp|Q5SQX6|CYFP2_MOUSE Cytoplasmic FMR1-interacting protein 2 OS=Mus musculus (Mouse) OX=10090 GN=Cyfip2 PE=1 SV=2	CYFIP2	9.30044	9.04983	10.4315	10.5108	9.99172	10.0997	10.3357	9.90447	9.96332	9.98618	9.97946	9.88638
Q5SQX6;Q7TMB8	>sp|Q5SQX6|CYFP2_MOUSE Cytoplasmic FMR1-interacting protein 2 OS=Mus musculus (Mouse) OX=10090 GN=Cyfip2 PE=1 SV=2;>sp|Q7TMB8|CYFP1_MOUSE Cytoplasmic FMR1-interacting protein 1 OS=Mus musculus (Mouse) OX=10090 GN=Cyfip1 PE=1 SV=1	CYFIP2;CYFIP1	11.7069	11.7706	11.15	11.3456	11.5147	11.6826	11.2381	11.4077	11.2421	11.1717	11.3577	11.488
Q9CX80	>sp|Q9CX80|CYGB_MOUSE Cytoglobin OS=Mus musculus (Mouse) OX=10090 GN=Cygb PE=1 SV=1	CYGB	11.3958	11.0696	10.585	10.8915	10.9918	10.9591	11.0229	11.0564	11.0958	11.1538	10.9223	10.997
Q9QXA1	>sp|Q9QXA1|CYHR1_MOUSE Cysteine and histidine-rich protein 1 OS=Mus musculus (Mouse) OX=10090 GN=Cyhr1 PE=1 SV=1	CYHR1							10.5405	10.8826	10.5015	9.94179	10.2001	9.77151
Q9QZ82	>sp|Q9QZ82|CP11A_MOUSE Cholesterol side-chain cleavage enzyme, mitochondrial OS=Mus musculus (Mouse) OX=10090 GN=Cyp11a1 PE=1 SV=1	CYP11A1	16.6604	16.8644	16.7092	17.1643	17.0282	16.6821	16.8458	16.6945	17.0295	17.2712	17.5359	17.2301
Q3TG86	>tr|Q3TG86|Q3TG86_MOUSE Cytochrome P450, family 11, subfamily b, polypeptide 1 OS=Mus musculus (Mouse) OX=10090 GN=Cyp11b1 PE=1 SV=1	CYP11B1	15.7445	15.9632	15.7652	15.9944	16.0055	15.4634	16.0608	15.912	16.3366	16.2545	16.6196	16.3845
P15539	>sp|P15539|C11B2_MOUSE Cytochrome P450 11B2, mitochondrial OS=Mus musculus (Mouse) OX=10090 GN=Cyp11b2 PE=2 SV=3	CYP11B2	14.2636	14.2209	13.8251	14.355	14.3599	14.3117	14.3878	14.4001	14.4207	14.424	14.4346	14.6676
Q64429	>sp|Q64429|CP1B1_MOUSE Cytochrome P450 1B1 OS=Mus musculus (Mouse) OX=10090 GN=Cyp1b1 PE=1 SV=3	CYP1B1	10.966	11.7676	11.2544	11.0129	11.6375	11.2309
Q8BKE6	>sp|Q8BKE6|CP20A_MOUSE Cytochrome P450 20A1 OS=Mus musculus (Mouse) OX=10090 GN=Cyp20a1 PE=1 SV=1	CYP20A1	11.7505	12.2128	12.0794	11.9247	12.23	11.7285	11.7267	11.7618	12.0021	11.9639	12.1181	11.7034
P03940	>sp|P03940|CP21A_MOUSE Steroid 21-hydroxylase OS=Mus musculus (Mouse) OX=10090 GN=Cyp21 PE=2 SV=3	CYP21	16.1819	16.1228	16.306	16.4842	16.5398	16.4661	16.2677	16.0696	16.2768	16.5878	16.756	16.6325
Q64441	>sp|Q64441|CP24A_MOUSE 1,25-dihydroxyvitamin D(3) 24-hydroxylase, mitochondrial OS=Mus musculus (Mouse) OX=10090 GN=Cyp24a1 PE=2 SV=1	CYP24A1	10.924		11.7338	11.2087	11.0283	11.2082	10.6196	10.1363	11.0905	10.4124	11.2139	10.8845
Q9JKY7	>tr|Q9JKY7|Q9JKY7_MOUSE Cytochrome P450 CYP2D22 OS=Mus musculus (Mouse) OX=10090 GN=Cyp2d22 PE=1 SV=1	CYP2D22	12.0124	12.0739	11.3831	11.6806	11.9528	11.8808	11.5499	11.8121	10.8664	11.2338	11.2195	11.1971
P33267	>sp|P33267|CP2F2_MOUSE Cytochrome P450 2F2 OS=Mus musculus (Mouse) OX=10090 GN=Cyp2f2 PE=1 SV=1	CYP2F2	18.9657	18.8371	19.3758	19.7217	19.5169	19.2397	19.0704	18.9154	19.1298	19.5769	19.6697	19.5279
Q64462	>sp|Q64462|CP4B1_MOUSE Cytochrome P450 4B1 OS=Mus musculus (Mouse) OX=10090 GN=Cyp4b1 PE=1 SV=1	CYP4B1	11.4653	11.5576	10.7415	11.5552	11.4309	10.8545
Q99N19	>tr|Q99N19|Q99N19_MOUSE Cytochrome P450 CYP4F13 OS=Mus musculus (Mouse) OX=10090 GN=Cyp4f13 PE=1 SV=1	CYP4F13	11.0037	11.5911	11.0098	10.035	11.1002	10.7928	11.0242	11.0705	11.1114	10.8877	10.0084	10.9215
Q9EP75	>sp|Q9EP75|CP4FE_MOUSE Leukotriene-B4 omega-hydroxylase 3 OS=Mus musculus (Mouse) OX=10090 GN=Cyp4f14 PE=1 SV=1	CYP4F14	9.83544	10.7381	11.1743	10.5234	10.6361	10.6762	11.0562	10.2229	10.9148	10.7852	11.5992	11.0101
Q9DBW0	>sp|Q9DBW0|CP4V2_MOUSE Cytochrome P450 4V2 OS=Mus musculus (Mouse) OX=10090 GN=Cyp4v2 PE=1 SV=1	CYP4V2	11.17	11.5361	10.8057	10.6898	10.6512	9.66117	11.128	11.2034	11.38	10.4501	10.1552	10.7922
Q8K0C4	>sp|Q8K0C4|CP51A_MOUSE Lanosterol 14-alpha demethylase OS=Mus musculus (Mouse) OX=10090 GN=Cyp51a1 PE=1 SV=1	CYP51A1	12.0446	12.2858	12.6529	11.7086	12.5442	11.7459	11.4066	11.401	11.9169	11.4407	11.6877	11.6247
Q8K353	>sp|Q8K353|CYTM1_MOUSE Cysteine-rich and transmembrane domain-containing protein 1 OS=Mus musculus (Mouse) OX=10090 GN=Cystm1 PE=1 SV=1	CYSTM1	11.483	11.603	11.5486	10.7017	11.0196	12.0615
O08967	>sp|O08967|CYH3_MOUSE Cytohesin-3 OS=Mus musculus (Mouse) OX=10090 GN=Cyth3 PE=1 SV=1	CYTH3	11.2774	12.3737	11.649	10.1694	11.0187	11.0895	11.5571	11.8397	11.1716	10.4055	11.1193	10.9555
Q8BHG2	>sp|Q8BHG2|CZIB_MOUSE CXXC motif containing zinc binding protein OS=Mus musculus (Mouse) OX=10090 GN=Czib PE=1 SV=1	CZIB	12.1094	12.4031	12.1879	11.7079	11.7993	11.5291	11.735	12.2734	11.7908	10.684	11.9268	11.9072
Q9Z1R4	>sp|Q9Z1R4|CF047_MOUSE Uncharacterized protein C6orf47 homolog OS=Mus musculus (Mouse) OX=10090 GN=D17h6s53e PE=1 SV=1	D17H6S53E	11.0623	11.1972	10.4866		10.9109	10.8124	10.725	10.6545	11.0722	10.9069	10.5458	10.6904
Q91YN0	>sp|Q91YN0|CL004_MOUSE Protein C12orf4 homolog OS=Mus musculus (Mouse) OX=10090 GN=D6Wsu163e PE=1 SV=1	D6WSU163E							9.88026	10.6376	10.2809		10.2963	9.72754
Q80U19	>sp|Q80U19|DAAM2_MOUSE Disheveled-associated activator of morphogenesis 2 OS=Mus musculus (Mouse) OX=10090 GN=Daam2 PE=1 SV=4	DAAM2							10.6257	10.9781	11.0207		10.9086	9.77204
P98078	>sp|P98078|DAB2_MOUSE Disabled homolog 2 OS=Mus musculus (Mouse) OX=10090 GN=Dab2 PE=1 SV=2	DAB2	12.244	12.1193	11.7374	11.928	11.9607	12.266	12.2182	12.1463	11.3859	11.8274	11.8569	11.8202
P61804	>sp|P61804|DAD1_MOUSE Dolichyl-diphosphooligosaccharide--protein glycosyltransferase subunit DAD1 OS=Mus musculus (Mouse) OX=10090 GN=Dad1 PE=1 SV=3	DAD1	14.5973	14.0802	14.7978	13.749	14.0727	14.2011	13.8813	14.1653	14.5795	14.7386	14.2786	14.1497
Q62165	>sp|Q62165|DAG1_MOUSE Dystroglycan OS=Mus musculus (Mouse) OX=10090 GN=Dag1 PE=1 SV=4	DAG1	10.7934	11.0666	11.3851	10.8299	11.383	11.1472	10.8344	10.6756	10.6911	11.0989	11.0521	10.8759
Q9ER88	>sp|Q9ER88|RT29_MOUSE 28S ribosomal protein S29, mitochondrial OS=Mus musculus (Mouse) OX=10090 GN=Dap3 PE=1 SV=1	DAP3	11.1347	11.2438	11.047	11.1705	11.3762	11.3555	11.2975	11.2768	11.5358	11.2523	11.4184	11.1886
Q922B2	>sp|Q922B2|SYDC_MOUSE Aspartate--tRNA ligase, cytoplasmic OS=Mus musculus (Mouse) OX=10090 GN=Dars PE=1 SV=2	DARS	12.5221	12.3281	12.5681	12.8596	12.429	12.8118	12.5308	12.6381	12.341	12.7159	12.4402	12.5747
Q8BIP0	>sp|Q8BIP0|SYDM_MOUSE Aspartate--tRNA ligase, mitochondrial OS=Mus musculus (Mouse) OX=10090 GN=Dars2 PE=1 SV=1	DARS2	11.4523	11.6792	11.6852	11.2381	11.5468	11.021	11.6046	11.339	12.0936	11.4226	11.2863	11.8295
Q9JII5	>sp|Q9JII5|DAZP1_MOUSE DAZ-associated protein 1 OS=Mus musculus (Mouse) OX=10090 GN=Dazap1 PE=1 SV=2	DAZAP1	10.6717	10.292	9.79973	10.4126	10.7873	10.9732	10.3884	10.7096	10.3894	10.7148	10.3245	9.71628
Q64237	>sp|Q64237|DOPO_MOUSE Dopamine beta-hydroxylase OS=Mus musculus (Mouse) OX=10090 GN=Dbh PE=1 SV=2	DBH	9.88311	9.55641	11.0768	10.1623	10.3349	10.1253		9.88714	9.5946	10.4751	10.7409	10.116
P31786	>sp|P31786|ACBP_MOUSE Acyl-CoA-binding protein OS=Mus musculus (Mouse) OX=10090 GN=Dbi PE=1 SV=2	DBI	13.6602	13.35	13.0849	11.8867	12.716	12.1079	13.0058	13.6482	13.493	13.1797	13.3778	13.1897
Q9QXS6	>sp|Q9QXS6|DREB_MOUSE Drebrin OS=Mus musculus (Mouse) OX=10090 GN=Dbn1 PE=1 SV=4	DBN1	10.2084	10.0002	9.73793	9.72959	10.4129	10.1146	9.95179	9.68296	9.50727	10.4043	10.2141	9.7933
Q62418	>sp|Q62418|DBNL_MOUSE Drebrin-like protein OS=Mus musculus (Mouse) OX=10090 GN=Dbnl PE=1 SV=2	DBNL	10.1448	10.0876	10.5009	10.3746	10.1216	10.8506	10.4514	10.1296	9.7163	10.4019	10.5292	10.1649
Q923B1	>sp|Q923B1|DBR1_MOUSE Lariat debranching enzyme OS=Mus musculus (Mouse) OX=10090 GN=Dbr1 PE=1 SV=2	DBR1	11.1414	11.0282	11.8381	10.8054	10.7397	11.8463	11.2025	10.8953	11.0589		11.2822	10.8802
P53395	>sp|P53395|ODB2_MOUSE Lipoamide acyltransferase component of branched-chain alpha-keto acid dehydrogenase complex, mitochondrial OS=Mus musculus (Mouse) OX=10090 GN=Dbt PE=1 SV=2	DBT	12.9697	13.1868	13.2621	13.3351	13.2288	12.9474	13.3083	13.0586	13.4533	13.4368	13.5153	13.4735
Q91VU6	>sp|Q91VU6|DCA11_MOUSE DDB1- and CUL4-associated factor 11 OS=Mus musculus (Mouse) OX=10090 GN=Dcaf11 PE=1 SV=1	DCAF11							9.45115	9.37753	9.08312	9.33295		9.55331
P61963	>sp|P61963|DCAF7_MOUSE DDB1- and CUL4-associated factor 7 OS=Mus musculus (Mouse) OX=10090 GN=Dcaf7 PE=1 SV=1	DCAF7	10.9922	11.1458	10.6157		10.3022	9.73496	10.4223	10.6505	10.5957	10.2803		10.4705
Q8N7N5	>sp|Q8N7N5|DCAF8_MOUSE DDB1- and CUL4-associated factor 8 OS=Mus musculus (Mouse) OX=10090 GN=Dcaf8 PE=1 SV=1	DCAF8	10.6475	10.7226	11.0019	10.8612	10.6679	11.1746	11.2726	10.6824	10.7011	10.9166	11.5071	10.8916
Q8BHC4	>sp|Q8BHC4|DCAKD_MOUSE Dephospho-CoA kinase domain-containing protein OS=Mus musculus (Mouse) OX=10090 GN=Dcakd PE=1 SV=1	DCAKD	12.5761	12.5902	12.6566	12.4111	12.7372	12.4552	12.5644	12.5259	12.6226	12.4026	12.552	12.6291
Q9DAR7	>sp|Q9DAR7|DCPS_MOUSE m7GpppX diphosphatase OS=Mus musculus (Mouse) OX=10090 GN=Dcps PE=1 SV=1	DCPS	11.2221	11.0652	10.8945	10.4539	10.8321	11.0403	11.1617	11.3047	11.0581	10.8698	11.0512	11.1063
O08788	>sp|O08788|DCTN1_MOUSE Dynactin subunit 1 OS=Mus musculus (Mouse) OX=10090 GN=Dctn1 PE=1 SV=3	DCTN1	11.0931	10.9826	11.0575	11.0261	11.0436	11.1564	11.1246	11.2195	11.0133	11.336	10.9865	11.0364
Q99KJ8	>sp|Q99KJ8|DCTN2_MOUSE Dynactin subunit 2 OS=Mus musculus (Mouse) OX=10090 GN=Dctn2 PE=1 SV=3	DCTN2	11.2889	11.4613	11.2792	11.5677	11.2366	11.6879	11.5216	11.4463	11.2095	11.4655	11.3877	11.5222
Q9Z0Y1	>sp|Q9Z0Y1|DCTN3_MOUSE Dynactin subunit 3 OS=Mus musculus (Mouse) OX=10090 GN=Dctn3 PE=1 SV=2	DCTN3	12.6788	12.2472	12.7334	13.2989	12.685	13.4569	12.6043	12.4192	12.2336	13.2403	12.4947	12.3569
Q8CBY8	>sp|Q8CBY8|DCTN4_MOUSE Dynactin subunit 4 OS=Mus musculus (Mouse) OX=10090 GN=Dctn4 PE=1 SV=1	DCTN4	11.1713	11.1468	10.9514	10.8047	11.2825	11.4345	10.9365	11.0973	10.951	10.9929	11.1807	11.155
Q9QZ73	>sp|Q9QZ73|DCNL1_MOUSE DCN1-like protein 1 OS=Mus musculus (Mouse) OX=10090 GN=Dcun1d1 PE=2 SV=1	DCUN1D1	10.8273	10.9099	10.8365	10.9456	11.2061	10.8162	10.7063	10.8022	10.6351	9.89489	11.1449	10.5761
Q9CXV9	>sp|Q9CXV9|DCNL5_MOUSE DCN1-like protein 5 OS=Mus musculus (Mouse) OX=10090 GN=Dcun1d5 PE=1 SV=1	DCUN1D5	9.84594	10.3196	10.8599		10.1894	10.8611	10.7038	10.2066	10.874		10.4535	10.358
Q91X52	>sp|Q91X52|DCXR_MOUSE L-xylulose reductase OS=Mus musculus (Mouse) OX=10090 GN=Dcxr PE=1 SV=2	DCXR	10.78	10.6765	10.4473	11.3737	10.5943	10.942	11.2113	11.0748	10.9865	10.9942	11.1672	10.6733
Q99LD8	>sp|Q99LD8|DDAH2_MOUSE N(G),N(G)-dimethylarginine dimethylaminohydrolase 2 OS=Mus musculus (Mouse) OX=10090 GN=Ddah2 PE=1 SV=1	DDAH2	11.3389	11.239	10.813	11.4717	10.8715	11.2095	10.518	10.728	10.2905	10.646	10.743	10.5259
Q3U1J4	>sp|Q3U1J4|DDB1_MOUSE DNA damage-binding protein 1 OS=Mus musculus (Mouse) OX=10090 GN=Ddb1 PE=1 SV=2	DDB1	12.077	11.9487	12.1144	12.2686	11.8794	12.1135	12.147	12.2747	11.8803	12.2014	11.977	12.0857
A2ADY9	>sp|A2ADY9|DDI2_MOUSE Protein DDI1 homolog 2 OS=Mus musculus (Mouse) OX=10090 GN=Ddi2 PE=1 SV=1	DDI2	11.0617	11.1924	11.4144	11.0972	10.7344	11.3512	11.1612	10.9072	11.2215	10.2743	10.3629	10.9151
O54734	>sp|O54734|OST48_MOUSE Dolichyl-diphosphooligosaccharide--protein glycosyltransferase 48 kDa subunit OS=Mus musculus (Mouse) OX=10090 GN=Ddost PE=1 SV=2	DDOST	14.373	14.5693	14.4935	14.4535	14.444	14.3869	14.1489	14.257	14.2537	14.3853	14.2461	14.1804
Q80WW9	>sp|Q80WW9|DDRGK_MOUSE DDRGK domain-containing protein 1 OS=Mus musculus (Mouse) OX=10090 GN=Ddrgk1 PE=1 SV=2	DDRGK1	10.9826	10.1851	10.6055	10.6711	10.3721	10.2566	10.7262	10.1587	10.2334	11.0922	10.2433	10.8353
O35215	>sp|O35215|DOPD_MOUSE D-dopachrome decarboxylase OS=Mus musculus (Mouse) OX=10090 GN=Ddt PE=1 SV=3	DDT	12.7878	12.7858	12.4881	12.1195	12.4683	11.8321	12.5573	12.5927	13.086	12.755	12.9407	12.9546
Q91VR5	>sp|Q91VR5|DDX1_MOUSE ATP-dependent RNA helicase DDX1 OS=Mus musculus (Mouse) OX=10090 GN=Ddx1 PE=1 SV=1	DDX1	12.2441	12.0761	12.0073	11.9941	11.9783	12.2516	12.0612	12.1946	12.1131	12.182	12.0387	12.0395
Q501J6	>sp|Q501J6|DDX17_MOUSE Probable ATP-dependent RNA helicase DDX17 OS=Mus musculus (Mouse) OX=10090 GN=Ddx17 PE=1 SV=1	DDX17	12.3024	12.4004	12.3355	12.3771	12.3285	12.5079	12.5715	12.3957	12.4542	12.3531	12.2122	12.3276
Q501J6;Q61656	>sp|Q501J6|DDX17_MOUSE Probable ATP-dependent RNA helicase DDX17 OS=Mus musculus (Mouse) OX=10090 GN=Ddx17 PE=1 SV=1;>sp|Q61656|DDX5_MOUSE Probable ATP-dependent RNA helicase DDX5 OS=Mus musculus (Mouse) OX=10090 GN=Ddx5 PE=1 SV=2	DDX17;DDX5	14.8669	14.7407	14.8123	14.8361	14.5778	14.9395	14.683	14.7542	14.6671	14.8894	14.6378	14.6538
Q501J6;Q61656;Q62095;Q62167	>sp|Q501J6|DDX17_MOUSE Probable ATP-dependent RNA helicase DDX17 OS=Mus musculus (Mouse) OX=10090 GN=Ddx17 PE=1 SV=1;>sp|Q61656|DDX5_MOUSE Probable ATP-dependent RNA helicase DDX5 OS=Mus musculus (Mouse) OX=10090 GN=Ddx5 PE=1 SV=2;>sp|Q62095|DDX3Y_MOUSE ATP-dependent RNA helicase DDX3Y OS=Mus musculus (Mouse) OX=10090 GN=Ddx3y PE=1 SV=2;>sp|Q62167|DDX3X_MOUSE ATP-dependent RNA helicase DDX3X OS=M…	DDX17;DDX5;DDX3Y;DDX3X	13.0325	13.001	13.0286	13.0925	13.2956	13.4628	12.9065	13.0168	12.592	12.0599	13.0281	12.7813
Q8K363	>sp|Q8K363|DDX18_MOUSE ATP-dependent RNA helicase DDX18 OS=Mus musculus (Mouse) OX=10090 GN=Ddx18 PE=1 SV=1	DDX18	10.6269	10.8425	10.548	11.1262	11.1012	11.2206	10.5948	10.4827	10.5523	10.635	11.0477	10.3891
Q61655	>sp|Q61655|DD19A_MOUSE ATP-dependent RNA helicase DDX19A OS=Mus musculus (Mouse) OX=10090 GN=Ddx19a PE=1 SV=2	DDX19A	10.4657	10.8165	10.88	10.5145	10.6401	11.1377	10.374	10.7299	10.5176	10.1052	10.7241	10.5212
Q9JIK5	>sp|Q9JIK5|DDX21_MOUSE Nucleolar RNA helicase 2 OS=Mus musculus (Mouse) OX=10090 GN=Ddx21 PE=1 SV=3	DDX21	11.7896	11.7459	11.7097	11.1198	11.7196	11.662	10.6833	10.8324	10.8464	10.7227	10.7943	10.8689
D3Z0M9	>tr|D3Z0M9|D3Z0M9_MOUSE DEAD (Asp-Glu-Ala-Asp) box polypeptide 23 OS=Mus musculus (Mouse) OX=10090 GN=Ddx23 PE=1 SV=1	DDX23	11.1793	10.8662		11.6805	11.2614	11.493	11.3169	11.1828	11.1542	12.0639	11.5942	11.3918
Q8VDW0	>sp|Q8VDW0|DX39A_MOUSE ATP-dependent RNA helicase DDX39A OS=Mus musculus (Mouse) OX=10090 GN=Ddx39a PE=1 SV=1	DDX39A	11.7582	11.5051	10.6915	10.6599	11.0789	11.3089	11.2999	10.6799		11.1865	11.0405	10.8039
Q8VDW0;Q9Z1N5	>sp|Q8VDW0|DX39A_MOUSE ATP-dependent RNA helicase DDX39A OS=Mus musculus (Mouse) OX=10090 GN=Ddx39a PE=1 SV=1;>sp|Q9Z1N5|DX39B_MOUSE Spliceosome RNA helicase Ddx39b OS=Mus musculus (Mouse) OX=10090 GN=Ddx39b PE=1 SV=1	DDX39A;DDX39B	13.1915	12.8507	13.3221	13.3833	13.1824	13.6428	12.8618	13.1756	12.9364	13.2699	13.2004	13.0418
Q9Z1N5	>sp|Q9Z1N5|DX39B_MOUSE Spliceosome RNA helicase Ddx39b OS=Mus musculus (Mouse) OX=10090 GN=Ddx39b PE=1 SV=1	DDX39B	13.17	13.0271	12.9668	13.1979	12.8645	13.1052	12.9688	13.2127	12.7747	13.173	12.7286	12.6038
Q62167	>sp|Q62167|DDX3X_MOUSE ATP-dependent RNA helicase DDX3X OS=Mus musculus (Mouse) OX=10090 GN=Ddx3x PE=1 SV=3	DDX3X	12.5508	12.0468	12.575	12.6846	12.1387	12.7382	12.1778	12.0329	11.7301	12.0744	12.4466	11.9201
Q62095	>sp|Q62095|DDX3Y_MOUSE ATP-dependent RNA helicase DDX3Y OS=Mus musculus (Mouse) OX=10090 GN=Ddx3y PE=1 SV=2	DDX3Y	11.0015	10.6337	10.3877	10.3063	11.0011	11.065	11.0254	10.6656	10.3126		10.6399	10.8783
Q62095;Q62167	>sp|Q62095|DDX3Y_MOUSE ATP-dependent RNA helicase DDX3Y OS=Mus musculus (Mouse) OX=10090 GN=Ddx3y PE=1 SV=2;>sp|Q62167|DDX3X_MOUSE ATP-dependent RNA helicase DDX3X OS=Mus musculus (Mouse) OX=10090 GN=Ddx3x PE=1 SV=3	DDX3Y;DDX3X	12.6226	12.3668	12.3419	12.2161	12.2891	12.5012	12.2887	12.5504	12.1652	11.966	12.235	12.2555
Q91VN6	>sp|Q91VN6|DDX41_MOUSE Probable ATP-dependent RNA helicase DDX41 OS=Mus musculus (Mouse) OX=10090 GN=Ddx41 PE=1 SV=2	DDX41	10.7644	11.0948	11.0956	11.3877	11.0637	11.2658	10.2628	10.4452	10.4328	10.8845	11.3734	10.3608
Q810A7	>sp|Q810A7|DDX42_MOUSE ATP-dependent RNA helicase DDX42 OS=Mus musculus (Mouse) OX=10090 GN=Ddx42 PE=1 SV=3	DDX42	11.0028	11.252	11.0535	10.7896	11.0349	11.4215	11.475	11.556	11.3048	11.1506	11.0495	10.9998
Q569Z5	>sp|Q569Z5|DDX46_MOUSE Probable ATP-dependent RNA helicase DDX46 OS=Mus musculus (Mouse) OX=10090 GN=Ddx46 PE=1 SV=2	DDX46	11.1325	11.0941	11.3268	11.1875	11.3275	11.4006	11.2731	11.218	11.1151	11.5425	11.6296	11.1777
Q9CWX9	>sp|Q9CWX9|DDX47_MOUSE Probable ATP-dependent RNA helicase DDX47 OS=Mus musculus (Mouse) OX=10090 GN=Ddx47 PE=2 SV=2	DDX47	10.9742	11.2073	10.9426	10.6415	10.5971	10.9874	10.819	10.6701	11.1375	9.78158	9.93601	10.7713
Q61656	>sp|Q61656|DDX5_MOUSE Probable ATP-dependent RNA helicase DDX5 OS=Mus musculus (Mouse) OX=10090 GN=Ddx5 PE=1 SV=2	DDX5	13.2155	12.8944	12.9362	12.8574	13.0106	13.3788	13.005	13.0642	12.7712	12.9011	12.7949	12.8902
Q99MJ9	>sp|Q99MJ9|DDX50_MOUSE ATP-dependent RNA helicase DDX50 OS=Mus musculus (Mouse) OX=10090 GN=Ddx50 PE=2 SV=1	DDX50	11.6042	11.8472	11.246	10.7044	11.3924	11.2834	11.5023	11.6517	11.2001	10.83	10.9797	10.5322
Q6P9R1	>sp|Q6P9R1|DDX51_MOUSE ATP-dependent RNA helicase DDX51 OS=Mus musculus (Mouse) OX=10090 GN=Ddx51 PE=1 SV=1	DDX51	9.92892	11.3114	11.288		11.5837	10.8967
Q9D0R4	>sp|Q9D0R4|DDX56_MOUSE Probable ATP-dependent RNA helicase DDX56 OS=Mus musculus (Mouse) OX=10090 GN=Ddx56 PE=2 SV=1	DDX56	11.165	11.2567	11.5538	10.8833	12.0322	11.4077	10.5652	11.3287	10.7391	10.324	10.5601	10.1282
Q6Q899	>sp|Q6Q899|DDX58_MOUSE Antiviral innate immune response receptor RIG-I OS=Mus musculus (Mouse) OX=10090 GN=Ddx58 PE=1 SV=2	DDX58	11.3354	11.4754	11.4889	11.4286	11.3786	11.4547	10.6866	10.8193	10.8387	10.6487	10.8502	10.4684
P54823	>sp|P54823|DDX6_MOUSE Probable ATP-dependent RNA helicase DDX6 OS=Mus musculus (Mouse) OX=10090 GN=Ddx6 PE=1 SV=1	DDX6	11.5608	11.4555	11.1039	11.3256	11.3514	11.6823	11.5457	11.7472	11.4168	11.2592	11.3323	11.47
Q9CQ62	>sp|Q9CQ62|DECR_MOUSE 2,4-dienoyl-CoA reductase, mitochondrial OS=Mus musculus (Mouse) OX=10090 GN=Decr1 PE=1 SV=1	DECR1	13.6934	13.9238	13.7928	13.6906	14.0068	13.4807	13.786	13.7539	14.0666	13.7824	13.9758	13.9279
Q9WV68	>sp|Q9WV68|DECR2_MOUSE Peroxisomal 2,4-dienoyl-CoA reductase OS=Mus musculus (Mouse) OX=10090 GN=Decr2 PE=1 SV=1	DECR2	10.9232	11.1351	11.1904	10.8508	10.8991	10.5255	11.1482	10.9535	11.5055	10.6315	11.2071	10.6925
O09005	>sp|O09005|DEGS1_MOUSE Sphingolipid delta(4)-desaturase DES1 OS=Mus musculus (Mouse) OX=10090 GN=Degs1 PE=1 SV=1	DEGS1	11.26	11.9318	11.2533	9.95019	11.307	10.609	11.3443	11.1041	11.2226	9.91639	11.2185	10.5719
Q7TNV0	>sp|Q7TNV0|DEK_MOUSE Protein DEK OS=Mus musculus (Mouse) OX=10090 GN=Dek PE=1 SV=1	DEK	11.6809	11.0814	11.3904	11.7401	11.3253	12.1445	12.0037	12.1147	11.7022	12.1743	11.7678	11.657
Q9D8N2	>sp|Q9D8N2|DEN10_MOUSE DENN domain-containing protein 10 OS=Mus musculus (Mouse) OX=10090 GN=Dennd10 PE=1 SV=2	DENND10	11.141	11.1445	10.5794	10.7829	10.687	10.9002	11.0615	11.326	11.18	10.9322	10.8942	11.113
Q6P9P8	>sp|Q6P9P8|DEN2C_MOUSE DENN domain-containing protein 2C OS=Mus musculus (Mouse) OX=10090 GN=Dennd2c PE=1 SV=1	DENND2C	13.0331	12.8255		12.7165	11.6836	12.7251	12.9979	12.904	12.7353	12.8935	13.0695	13.123
A6H8H2	>sp|A6H8H2|DEN4C_MOUSE DENN domain-containing protein 4C OS=Mus musculus (Mouse) OX=10090 GN=Dennd4c PE=1 SV=1	DENND4C	10.5419	10.7086	10.1274	10.4148	10.7294	10.2705	10.3137	10.3854	10.4921	10.1032	10.4761	9.80864
Q570Y9	>sp|Q570Y9|DPTOR_MOUSE DEP domain-containing mTOR-interacting protein OS=Mus musculus (Mouse) OX=10090 GN=Deptor PE=1 SV=2	DEPTOR	10.6705	10.8543	10.6697	10.8859	10.2558	10.3824	11.2272	11.0928	10.8161	11.3202	11.6238	10.9485
Q91YP3	>sp|Q91YP3|DEOC_MOUSE Deoxyribose-phosphate aldolase OS=Mus musculus (Mouse) OX=10090 GN=Dera PE=1 SV=1	DERA	11.0392	10.6227	11.4247		11.2829	10.8737	10.9638	10.9753	11.2941		10.1198	10.5858
Q99J56	>sp|Q99J56|DERL1_MOUSE Derlin-1 OS=Mus musculus (Mouse) OX=10090 GN=Derl1 PE=1 SV=1	DERL1	12.4265	11.9646	12.6421	11.9586	12.4787	11.7899	12.7563	12.6175	13.0835	13.1108	12.8097	12.9038
Q8BNI4	>sp|Q8BNI4|DERL2_MOUSE Derlin-2 OS=Mus musculus (Mouse) OX=10090 GN=Derl2 PE=1 SV=2	DERL2	11.9109	11.9767	12.179	11.8993	12.1618	12.2437	11.8393	11.9239	11.609	12.4542	11.369	11.8386
P31001	>sp|P31001|DESM_MOUSE Desmin OS=Mus musculus (Mouse) OX=10090 GN=Des PE=1 SV=3	DES	12.9049	12.3733	12.2533	12.0568	11.9926	12.2039	11.1096	11.4694	10.9709	11.5739	11.4604	11.0679
Q9Z2A7	>sp|Q9Z2A7|DGAT1_MOUSE Diacylglycerol O-acyltransferase 1 OS=Mus musculus (Mouse) OX=10090 GN=Dgat1 PE=1 SV=1	DGAT1	9.88865	10.2088		11.0851	10.1522	9.85091	9.94151	9.97396	10.155	9.89832	9.7927	10.0241
Q8BH86	>sp|Q8BH86|GLUCM_MOUSE D-glutamate cyclase, mitochondrial OS=Mus musculus (Mouse) OX=10090 GN=Dglucy PE=1 SV=1	DGLUCY	11.5779	11.8946	11.8282	11.7443	11.7767	11.753	11.9282	11.8748	12.1415	11.8399	11.8052	11.7312
Q9QX60	>sp|Q9QX60|DGUOK_MOUSE Deoxyguanosine kinase, mitochondrial OS=Mus musculus (Mouse) OX=10090 GN=Dguok PE=1 SV=3	DGUOK	11.407	11.4915	11.4219	11.3635	11.9054	11.2312	11.8025	11.516	11.5929	11.4562	11.5238	11.4084
Q8VCH6	>sp|Q8VCH6|DHC24_MOUSE Delta(24)-sterol reductase OS=Mus musculus (Mouse) OX=10090 GN=Dhcr24 PE=1 SV=1	DHCR24	11.9469	12.1387	12.3411	12.6323	11.8649	11.8318	12.3406	11.9736	13.1451	12.2655	12.9847	12.6431
O88455	>sp|O88455|DHCR7_MOUSE 7-dehydrocholesterol reductase OS=Mus musculus (Mouse) OX=10090 GN=Dhcr7 PE=1 SV=1	DHCR7	15.5926	15.8006	15.2589	15.1013	15.7995	15.0962	15.2164	15.0934	15.6372	15.2578	15.4458	15.5141
Q9DBB8	>sp|Q9DBB8|DHDH_MOUSE Trans-1,2-dihydrobenzene-1,2-diol dehydrogenase OS=Mus musculus (Mouse) OX=10090 GN=Dhdh PE=1 SV=1	DHDH	11.978	11.9285	11.8044	12.1517	11.9778	12.064	12.6203	12.4379	12.4892	12.284	12.2663	12.4234
P00375	>sp|P00375|DYR_MOUSE Dihydrofolate reductase OS=Mus musculus (Mouse) OX=10090 GN=Dhfr PE=1 SV=3	DHFR	12.0388	12.031		10.012	11.9031	10.0807
O35435	>sp|O35435|PYRD_MOUSE Dihydroorotate dehydrogenase (quinone), mitochondrial OS=Mus musculus (Mouse) OX=10090 GN=Dhodh PE=1 SV=2	DHODH	11.711	11.8604	12.0586	11.9581	12.1518	11.5572	11.8828	11.677	12.1041	11.9841	12.0571	12.0551
Q99L04	>sp|Q99L04|DHRS1_MOUSE Dehydrogenase/reductase SDR family member 1 OS=Mus musculus (Mouse) OX=10090 GN=Dhrs1 PE=1 SV=1	DHRS1	12.3014	12.2955	12.4043	12.7861	12.3792	12.5159	12.6319	12.4638	12.6267	12.8806	12.5925	12.5658
Q5SS80	>sp|Q5SS80|DHR13_MOUSE Dehydrogenase/reductase SDR family member 13 OS=Mus musculus (Mouse) OX=10090 GN=Dhrs13 PE=1 SV=1	DHRS13	11.338	11.6135	11.4201	11.0526	11.2608	10.771	11.4199	11.2143	11.6915	11.4701	11.6637	11.6231
Q99LB2	>sp|Q99LB2|DHRS4_MOUSE Dehydrogenase/reductase SDR family member 4 OS=Mus musculus (Mouse) OX=10090 GN=Dhrs4 PE=1 SV=3	DHRS4	12.415	12.4763	12.5841	12.6998	12.7228	12.3713	12.6788	12.5733	12.7697	12.7162	12.8781	12.7981
Q9CXR1	>sp|Q9CXR1|DHRS7_MOUSE Dehydrogenase/reductase SDR family member 7 OS=Mus musculus (Mouse) OX=10090 GN=Dhrs7 PE=1 SV=2	DHRS7	12.158	12.2673	12.3497	12.5489	12.3837	12.239	12.3456	12.1191	12.5322	12.3463	12.7453	12.4849
Q99J47	>sp|Q99J47|DRS7B_MOUSE Dehydrogenase/reductase SDR family member 7B OS=Mus musculus (Mouse) OX=10090 GN=Dhrs7b PE=1 SV=1	DHRS7B	11.7555	11.9248	12.123	11.6049	12.125	11.8398	11.9028	11.6225	12.1607	11.7313	12.0202	11.979
Q8VBZ0	>sp|Q8VBZ0|DHRSX_MOUSE Dehydrogenase/reductase SDR family member on chromosome X homolog OS=Mus musculus (Mouse) OX=10090 GN=Dhrsx PE=1 SV=2	DHRSX	11.0916	11.1061	11.4353	11.6055	11.255	10.3582	10.129	10.1981	10.0456	11.04	10.3378	10.7912
O35286	>sp|O35286|DHX15_MOUSE Pre-mRNA-splicing factor ATP-dependent RNA helicase DHX15 OS=Mus musculus (Mouse) OX=10090 GN=Dhx15 PE=1 SV=2	DHX15	12.2963	12.2814	12.2548	12.1496	12.1682	12.3554	12.2046	12.2577	12.1267	12.2497	11.9683	12.08
Q6PGC1	>sp|Q6PGC1|DHX29_MOUSE ATP-dependent RNA helicase DHX29 OS=Mus musculus (Mouse) OX=10090 GN=Dhx29 PE=1 SV=1	DHX29	10.5719	10.882	10.6318	10.4743	10.8865	10.9801	11.2989	10.808	9.97013	9.94161	10.8056	10.5775
Q99PU8	>sp|Q99PU8|DHX30_MOUSE ATP-dependent RNA helicase DHX30 OS=Mus musculus (Mouse) OX=10090 GN=Dhx30 PE=1 SV=1	DHX30	11.1391	11.1847	10.9487	11.196	10.8305	11.1234	10.8776	10.6335	11.2209	10.7994	10.9036	11.1872
Q8VHK9	>sp|Q8VHK9|DHX36_MOUSE ATP-dependent DNA/RNA helicase DHX36 OS=Mus musculus (Mouse) OX=10090 GN=Dhx36 PE=1 SV=2	DHX36							10.1403	10.344	10.0605		10.2962	10.4576
Q80X98	>tr|Q80X98|Q80X98_MOUSE DEAH (Asp-Glu-Ala-His) box polypeptide 38 OS=Mus musculus (Mouse) OX=10090 GN=Dhx38 PE=1 SV=1	DHX38							11.3417	11.0488	10.4456		10.4073	10.5333
Q99J87	>sp|Q99J87|DHX58_MOUSE Probable ATP-dependent RNA helicase DHX58 OS=Mus musculus (Mouse) OX=10090 GN=Dhx58 PE=1 SV=2	DHX58	11.1822	11.1951	10.5072	11.4091	11.1292	11.4434
O70133	>sp|O70133|DHX9_MOUSE ATP-dependent RNA helicase A OS=Mus musculus (Mouse) OX=10090 GN=Dhx9 PE=1 SV=2	DHX9	11.9411	11.8987	11.8493	11.8753	11.8165	11.9226	11.9627	12.1385	11.8413	11.8246	11.9831	12.0232
Q9JIQ3	>sp|Q9JIQ3|DBLOH_MOUSE Diablo homolog, mitochondrial OS=Mus musculus (Mouse) OX=10090 GN=Diablo PE=1 SV=2	DIABLO	12.2082	12.1598	12.4155	12.4954	12.4049	12.2613	12.1549	12.3862	12.4477	12.4854	12.7315	12.582
O70566	>sp|O70566|DIAP2_MOUSE Protein diaphanous homolog 2 OS=Mus musculus (Mouse) OX=10090 GN=Diaph2 PE=1 SV=2	DIAPH2							10.343	10.7269	10.4943	11.3472	10.4161	10.1199
Q9D0D4	>sp|Q9D0D4|DIM1_MOUSE Probable dimethyladenosine transferase OS=Mus musculus (Mouse) OX=10090 GN=Dimt1 PE=2 SV=1	DIMT1	10.6996	11.0086	10.8119	11.2485	10.3865	10.972	10.2771	10.8493	10.9679	11.0987	11.5587	10.6665
Q9CSH3	>sp|Q9CSH3|RRP44_MOUSE Exosome complex exonuclease RRP44 OS=Mus musculus (Mouse) OX=10090 GN=Dis3 PE=1 SV=4	DIS3	11.3161	11.4061	11.2702	11.2649	11.1072	11.435	11.4147	11.3751	11.0315	11.0841	11.2766	11.1971
Q8CI75	>sp|Q8CI75|DI3L2_MOUSE DIS3-like exonuclease 2 OS=Mus musculus (Mouse) OX=10090 GN=Dis3l2 PE=1 SV=1	DIS3L2	10.6878	10.1959	10.8437	10.9621	10.5852	10.8047	10.2342	10.6207	10.4969		10.3026	9.57961
Q9ESX5	>sp|Q9ESX5|DKC1_MOUSE H/ACA ribonucleoprotein complex subunit DKC1 OS=Mus musculus (Mouse) OX=10090 GN=Dkc1 PE=1 SV=4	DKC1	11.7573	11.7889	11.3477	11.7474	11.9376	11.5475	11.4952	11.7601	11.6676	11.4431	11.6971	11.6528
Q8BMF4	>sp|Q8BMF4|ODP2_MOUSE Dihydrolipoyllysine-residue acetyltransferase component of pyruvate dehydrogenase complex, mitochondrial OS=Mus musculus (Mouse) OX=10090 GN=Dlat PE=1 SV=2	DLAT	13.0173	13.3008	13.2212	13.1673	13.375	13.0113	13.1935	13.2396	13.5144	13.1883	13.2889	13.3462
O08749	>sp|O08749|DLDH_MOUSE Dihydrolipoyl dehydrogenase, mitochondrial OS=Mus musculus (Mouse) OX=10090 GN=Dld PE=1 SV=2	DLD	14.0496	14.1578	14.4627	14.6914	14.3475	14.4056	14.4849	14.2863	14.4643	14.7567	14.7326	14.5327
Q811D0	>sp|Q811D0|DLG1_MOUSE Disks large homolog 1 OS=Mus musculus (Mouse) OX=10090 GN=Dlg1 PE=1 SV=1	DLG1	11.4164	11.2721	11.5818	11.0804	11.2366	11.532	11.1624	11.1082	10.8695	11.1004	11.3915	11.2114
Q811D0;Q91XM9	>sp|Q811D0|DLG1_MOUSE Disks large homolog 1 OS=Mus musculus (Mouse) OX=10090 GN=Dlg1 PE=1 SV=1;>sp|Q91XM9|DLG2_MOUSE Disks large homolog 2 OS=Mus musculus (Mouse) OX=10090 GN=Dlg2 PE=1 SV=2	DLG1;DLG2	10.5628	10.8054	9.66178		9.87905	11.139	10.5195	10.6437	10.5365	10.9319	10.6633	10.5553
Q91XM9	>sp|Q91XM9|DLG2_MOUSE Disks large homolog 2 OS=Mus musculus (Mouse) OX=10090 GN=Dlg2 PE=1 SV=2	DLG2	10.0235	9.35191		10.6484	10.2749	10.4818	10.3068	10.2263	10.4105	10.5098	10.8785	10.3715
P70175	>sp|P70175|DLG3_MOUSE Disks large homolog 3 OS=Mus musculus (Mouse) OX=10090 GN=Dlg3 PE=1 SV=1	DLG3	10.8864	10.7871	10.9794	10.3359	10.6221	11.1299	11.341	10.8988	10.765	11.0314	10.7698	10.8715
P70175;Q811D0;Q91XM9	>sp|P70175|DLG3_MOUSE Disks large homolog 3 OS=Mus musculus (Mouse) OX=10090 GN=Dlg3 PE=1 SV=1;>sp|Q811D0|DLG1_MOUSE Disks large homolog 1 OS=Mus musculus (Mouse) OX=10090 GN=Dlg1 PE=1 SV=1;>sp|Q91XM9|DLG2_MOUSE Disks large homolog 2 OS=Mus musculus (Mouse) OX=10090 GN=Dlg2 PE=1 SV=2	DLG3;DLG1;DLG2	12.2493	11.8497	11.7976	12.0072	11.9705	12.4191
Q9D2G2	>sp|Q9D2G2|ODO2_MOUSE Dihydrolipoyllysine-residue succinyltransferase component of 2-oxoglutarate dehydrogenase complex, mitochondrial OS=Mus musculus (Mouse) OX=10090 GN=Dlst PE=1 SV=1	DLST	13.4609	13.6542	14.025	13.9303	13.9889	13.7893	13.753	13.4819	13.8916	14.0196	13.9691	13.8598
Q9CQ00	>sp|Q9CQ00|DMAC1_MOUSE Distal membrane-arm assembly complex protein 1 OS=Mus musculus (Mouse) OX=10090 GN=Dmac1 PE=1 SV=1	DMAC1	11.4219	11.7911	12.0727	10.7931	11.668	10.7886	11.5402	11.4831	11.4645	12.5018	12.194	11.87
Q9CRA7	>sp|Q9CRA7|ATP5S_MOUSE ATP synthase subunit s, mitochondrial OS=Mus musculus (Mouse) OX=10090 GN=Dmac2l PE=1 SV=1	DMAC2L	11.4739	11.7723	11.9749	11.9882	12.204	11.5187	11.8814	11.6266	12.1329	11.8893	11.8869	12.1081
Q9JI44	>sp|Q9JI44|DMAP1_MOUSE DNA methyltransferase 1-associated protein 1 OS=Mus musculus (Mouse) OX=10090 GN=Dmap1 PE=1 SV=1	DMAP1	9.64185	9.77616	9.82475		10.0824	10.2798
P11531	>sp|P11531|DMD_MOUSE Dystrophin OS=Mus musculus (Mouse) OX=10090 GN=Dmd PE=1 SV=3	DMD	11.0036	11.2056	10.0391	10.7128	11.4397	11.2502	10.489	10.3666	10.4728	10.6731	10.9986	10.3814
B9EJR8	>sp|B9EJR8|DAAF5_MOUSE Dynein assembly factor 5, axonemal OS=Mus musculus (Mouse) OX=10090 GN=Dnaaf5 PE=1 SV=1	DNAAF5	10.9233	10.9133	9.98674		10.7191	10.9204
A0A571BGC3	>tr|A0A571BGC3|A0A571BGC3_MOUSE Dynein, axonemal, heavy chain 14 OS=Mus musculus (Mouse) OX=10090 GN=Dnah14 PE=4 SV=2	DNAH14		12.1244	12.094	11.9399	11.935	11.3405
P63037	>sp|P63037|DNJA1_MOUSE DnaJ homolog subfamily A member 1 OS=Mus musculus (Mouse) OX=10090 GN=Dnaja1 PE=1 SV=1	DNAJA1	11.7275	11.856	11.3059	11.1222	11.3913	11.5942	11.6978	11.6339	11.9081	11.4117	11.6415	11.5203
Q9QYJ0	>sp|Q9QYJ0|DNJA2_MOUSE DnaJ homolog subfamily A member 2 OS=Mus musculus (Mouse) OX=10090 GN=Dnaja2 PE=1 SV=1	DNAJA2	11.9422	11.7405	11.6264	11.4416	11.7442	11.7999	11.7154	11.6397	11.6159	11.5217	11.6745	11.8573
Q99M87	>sp|Q99M87|DNJA3_MOUSE DnaJ homolog subfamily A member 3, mitochondrial OS=Mus musculus (Mouse) OX=10090 GN=Dnaja3 PE=1 SV=1	DNAJA3	12.488	12.6787	12.6809	12.2957	12.4122	12.2437	12.4148	12.276	12.7602	12.2289	12.4032	12.5939
Q9QYJ3	>sp|Q9QYJ3|DNJB1_MOUSE DnaJ homolog subfamily B member 1 OS=Mus musculus (Mouse) OX=10090 GN=Dnajb1 PE=1 SV=3	DNAJB1	11.1436	11.2759	11.6619	10.5578	10.6441	11.9791	11.3881	9.30692	11.3958	11.9062	10.4824	10.2254
Q99KV1	>sp|Q99KV1|DJB11_MOUSE DnaJ homolog subfamily B member 11 OS=Mus musculus (Mouse) OX=10090 GN=Dnajb11 PE=1 SV=1	DNAJB11	12.5943	12.6337	12.1394	12.1523	12.2085	12.1899	11.8224	11.7027	12.0033	11.1882	11.9822	11.7791
Q9QYI4	>sp|Q9QYI4|DJB12_MOUSE DnaJ homolog subfamily B member 12 OS=Mus musculus (Mouse) OX=10090 GN=Dnajb12 PE=1 SV=2	DNAJB12	11.0729	10.9049	11.0831	10.6851	11.3221	11.0537	10.4884	10.7002	11.0158		11.3326	10.9326
Q149L6	>sp|Q149L6|DJB14_MOUSE DnaJ homolog subfamily B member 14 OS=Mus musculus (Mouse) OX=10090 GN=Dnajb14 PE=2 SV=1	DNAJB14	10.6425	10.2405		10.7322	10.7652	10.2829	10.7605	10.7472	10.5889	11.14		10.3141
Q9D832	>sp|Q9D832|DNJB4_MOUSE DnaJ homolog subfamily B member 4 OS=Mus musculus (Mouse) OX=10090 GN=Dnajb4 PE=1 SV=1	DNAJB4	11.8592	11.8626	11.2215	10.3265	11.2154	11.0053	11.249	11.5911	11.4884	10.7218	11.2865	11.6411
O54946	>sp|O54946|DNJB6_MOUSE DnaJ homolog subfamily B member 6 OS=Mus musculus (Mouse) OX=10090 GN=Dnajb6 PE=1 SV=4	DNAJB6	11.4091	11.3105	11.1577	11.4281	11.1705	10.9743	11.1285	11.5139	11.4017	11.1051	10.8123	10.6528
Q61712	>sp|Q61712|DNJC1_MOUSE DnaJ homolog subfamily C member 1 OS=Mus musculus (Mouse) OX=10090 GN=Dnajc1 PE=1 SV=1	DNAJC1	11.7523	11.8463	10.3524		11.5214	10.6782
Q9DC23	>sp|Q9DC23|DJC10_MOUSE DnaJ homolog subfamily C member 10 OS=Mus musculus (Mouse) OX=10090 GN=Dnajc10 PE=1 SV=2	DNAJC10	11.4552	11.6634	11.837	11.5857	11.5529	11.2974	10.8262	10.5761	11.0948	11.2748	11.0517	11.0206
Q5U458	>sp|Q5U458|DJC11_MOUSE DnaJ homolog subfamily C member 11 OS=Mus musculus (Mouse) OX=10090 GN=Dnajc11 PE=1 SV=2	DNAJC11	11.9432	12.1008	12.1782	12.5528	12.336	12.1721	12.1266	12.0069	12.5153	12.5286	12.5323	12.5472
D4AFX7	>tr|D4AFX7|D4AFX7_MOUSE J domain-containing protein OS=Mus musculus (Mouse) OX=10090 GN=Dnajc13 PE=1 SV=1	DNAJC13	10.8351	10.9574	11.062	10.7009	10.9805	10.8736	10.7877	10.877	10.6091	10.7206	10.8274	10.4734
Q78YY6	>sp|Q78YY6|DJC15_MOUSE DnaJ homolog subfamily C member 15 OS=Mus musculus (Mouse) OX=10090 GN=Dnajc15 PE=1 SV=1	DNAJC15	11.4057	12.0163	12.2086	10.6406	11.8121	11.5766	11.1558	10.8948	11.6876	11.7971	11.6289	11.7774
Q80TN4	>sp|Q80TN4|DJC16_MOUSE DnaJ homolog subfamily C member 16 OS=Mus musculus (Mouse) OX=10090 GN=Dnajc16 PE=1 SV=2	DNAJC16	10.7511	10.5209	11.0012	10.5068	10.8935	10.7852	10.6851	9.88582	10.5268	10.1281	10.4395	10.7405
Q9CQV7	>sp|Q9CQV7|TIM14_MOUSE Mitochondrial import inner membrane translocase subunit TIM14 OS=Mus musculus (Mouse) OX=10090 GN=Dnajc19 PE=1 SV=3	DNAJC19	11.5126	10.9957	12.1361	11.6714	11.7321	11.5081	11.1774	11.1068	12.0439	12.8545	12.3601	11.8448
P54103	>sp|P54103|DNJC2_MOUSE DnaJ homolog subfamily C member 2 OS=Mus musculus (Mouse) OX=10090 GN=Dnajc2 PE=1 SV=2	DNAJC2							10.528	10.6163	10.3906	10.8446		10.2516
A2ALW5	>sp|A2ALW5|DJC25_MOUSE DnaJ homolog subfamily C member 25 OS=Mus musculus (Mouse) OX=10090 GN=Dnajc25 PE=1 SV=1	DNAJC25							10.9764	10.8012	10.8615		10.4741	11.4409
Q8VCE1	>sp|Q8VCE1|DJC28_MOUSE DnaJ homolog subfamily C member 28 OS=Mus musculus (Mouse) OX=10090 GN=Dnajc28 PE=1 SV=2	DNAJC28	9.4051	9.49154	10.1246	10.1151	10.3695	9.86274	10.1366	10.0845	10.5536	10.6663	10.4345	10.4096
Q91YW3	>sp|Q91YW3|DNJC3_MOUSE DnaJ homolog subfamily C member 3 OS=Mus musculus (Mouse) OX=10090 GN=Dnajc3 PE=1 SV=1	DNAJC3	12.0488	12.0551	12.0044	12.3357	12.2306	12.2487	11.8294	11.7099	11.7635	11.9507	12.0166	11.8368
P59041	>sp|P59041|DJC30_MOUSE DnaJ homolog subfamily C member 30, mitochondrial OS=Mus musculus (Mouse) OX=10090 GN=Dnajc30 PE=1 SV=1	DNAJC30	10.8949	11.0038	10.4727		10.5448	9.55779	10.6709	10.7814	10.2933	11.2791	11.0262	10.7193
P60904	>sp|P60904|DNJC5_MOUSE DnaJ homolog subfamily C member 5 OS=Mus musculus (Mouse) OX=10090 GN=Dnajc5 PE=1 SV=1	DNAJC5	10.8569	10.7668	11.3425	11.4816	11.591	11.3343	10.7442	10.3728	10.8181		11.1081	10.4634
Q9QYI3	>sp|Q9QYI3|DNJC7_MOUSE DnaJ homolog subfamily C member 7 OS=Mus musculus (Mouse) OX=10090 GN=Dnajc7 PE=1 SV=2	DNAJC7	10.8783	10.7502	10.801	10.5214	10.8291	10.991	10.8521	11.0014	10.6919	10.5702	10.5256	10.4568
Q6NZB0	>sp|Q6NZB0|DNJC8_MOUSE DnaJ homolog subfamily C member 8 OS=Mus musculus (Mouse) OX=10090 GN=Dnajc8 PE=1 SV=2	DNAJC8	12.2958	11.5717	12.6039	12.4187	11.9685	12.0432	12.1902	12.0277	11.7219	12.6557	12.453	12.0132
Q91WN1	>sp|Q91WN1|DNJC9_MOUSE DnaJ homolog subfamily C member 9 OS=Mus musculus (Mouse) OX=10090 GN=Dnajc9 PE=1 SV=2	DNAJC9	11.0033	11.226	11.4809	10.7155	11.3048	10.983	11.3872	10.9199	11.5013	10.8774		11.1111
P56542	>sp|P56542|DNS2A_MOUSE Deoxyribonuclease-2-alpha OS=Mus musculus (Mouse) OX=10090 GN=Dnase2 PE=1 SV=1	DNASE2							11.3083	11.1033	11.0003	10.9729	11.4686	11.2963
Q9D113	>sp|Q9D113|DNLZ_MOUSE DNL-type zinc finger protein OS=Mus musculus (Mouse) OX=10090 GN=Dnlz PE=1 SV=1	DNLZ	11.0986	11.8802	12.1284		11.7468	11.3249
P39053;P39054	>sp|P39053|DYN1_MOUSE Dynamin-1 OS=Mus musculus (Mouse) OX=10090 GN=Dnm1 PE=1 SV=2;>sp|P39054|DYN2_MOUSE Dynamin-2 OS=Mus musculus (Mouse) OX=10090 GN=Dnm2 PE=1 SV=2	DNM1;DNM2	13.3521	12.8054	13.6441	13.5028	13.1399	13.8727	11.6893	13.2117	13.0932	13.4514	13.6698	13.0992
P39053;P39054;Q8BZ98	>sp|P39053|DYN1_MOUSE Dynamin-1 OS=Mus musculus (Mouse) OX=10090 GN=Dnm1 PE=1 SV=2;>sp|P39054|DYN2_MOUSE Dynamin-2 OS=Mus musculus (Mouse) OX=10090 GN=Dnm2 PE=1 SV=2;>sp|Q8BZ98|DYN3_MOUSE Dynamin-3 OS=Mus musculus (Mouse) OX=10090 GN=Dnm3 PE=1 SV=1	DNM1;DNM2;DNM3	12.7245	12.0754	12.3243	11.796	12.7539	13.245	12.813	12.9405	12.3163	12.57	12.9199	12.5537
Q8K1M6	>sp|Q8K1M6|DNM1L_MOUSE Dynamin-1-like protein OS=Mus musculus (Mouse) OX=10090 GN=Dnm1l PE=1 SV=2	DNM1L	12.2437	12.1794	12.1016	12.2756	12.0447	12.4178	12.298	12.6695	12.4731	11.9517	12.093	12.1981
P39054	>sp|P39054|DYN2_MOUSE Dynamin-2 OS=Mus musculus (Mouse) OX=10090 GN=Dnm2 PE=1 SV=2	DNM2	11.3416	11.2884	11.4678	11.4699	11.2735	11.7014	11.3526	11.6372	11.3427	11.619	11.3165	11.4049
P39054;Q8BZ98	>sp|P39054|DYN2_MOUSE Dynamin-2 OS=Mus musculus (Mouse) OX=10090 GN=Dnm2 PE=1 SV=2;>sp|Q8BZ98|DYN3_MOUSE Dynamin-3 OS=Mus musculus (Mouse) OX=10090 GN=Dnm3 PE=1 SV=1	DNM2;DNM3	13.0297	12.4602	11.8941	10.9369	11.3934	11.9269	12.7904		12.3091	11.333	10.6402	10.7431
P13864	>sp|P13864|DNMT1_MOUSE DNA (cytosine-5)-methyltransferase 1 OS=Mus musculus (Mouse) OX=10090 GN=Dnmt1 PE=1 SV=5	DNMT1	11.5529	11.4981	11.0787	10.6289	10.876	11.4477	10.6716	11.0962	10.7249	10.8735	10.6787	10.1388
Q9Z2W0	>sp|Q9Z2W0|DNPEP_MOUSE Aspartyl aminopeptidase OS=Mus musculus (Mouse) OX=10090 GN=Dnpep PE=1 SV=2	DNPEP	12.0032	12.1801	12.3777	12.2511	12.1264	12.2123	12.1523	12.3392	12.3018	12.2601	12.202	12.1833
Q8R2M2	>sp|Q8R2M2|TDIF2_MOUSE Deoxynucleotidyltransferase terminal-interacting protein 2 OS=Mus musculus (Mouse) OX=10090 GN=Dnttip2 PE=1 SV=1	DNTTIP2	12.1966	12.0026	12.5366	12.4545	12.21	12.7428	11.8833	12.3453	12.12	12.6665	12.35	12.5193
Q8BUR4	>sp|Q8BUR4|DOCK1_MOUSE Dedicator of cytokinesis protein 1 OS=Mus musculus (Mouse) OX=10090 GN=Dock1 PE=1 SV=3	DOCK1	11.3268	11.4249	11.4507	11.5113	11.2856	11.4417	11.6548	11.7307	11.3797	11.7476	11.493	11.3445
Q8VDR9	>sp|Q8VDR9|DOCK6_MOUSE Dedicator of cytokinesis protein 6 OS=Mus musculus (Mouse) OX=10090 GN=Dock6 PE=1 SV=4	DOCK6							9.92699	9.04459	9.09297	10.2397		9.62811
Q8R1A4	>sp|Q8R1A4|DOCK7_MOUSE Dedicator of cytokinesis protein 7 OS=Mus musculus (Mouse) OX=10090 GN=Dock7 PE=1 SV=3	DOCK7	10.2155	9.95378	10.772	9.74112	10.3528	10.6881	10.084	10.6875	10.6709		11.0102	10.028
Q8BIK4	>sp|Q8BIK4|DOCK9_MOUSE Dedicator of cytokinesis protein 9 OS=Mus musculus (Mouse) OX=10090 GN=Dock9 PE=1 SV=2	DOCK9							10.4449	9.71727	10.7295	10.8067		10.7025
P31428	>sp|P31428|DPEP1_MOUSE Dipeptidase 1 OS=Mus musculus (Mouse) OX=10090 GN=Dpep1 PE=1 SV=2	DPEP1	12.6962	12.5636	12.5646	12.4286	12.3117	12.1082	10.8192	11.411	11.1618	11.419	11.7386	11.2279
Q61103	>sp|Q61103|REQU_MOUSE Zinc finger protein ubi-d4 OS=Mus musculus (Mouse) OX=10090 GN=Dpf2 PE=1 SV=1	DPF2							10.6964	10.0909	10.8355		11.1265	9.67503
O70152	>sp|O70152|DPM1_MOUSE Dolichol-phosphate mannosyltransferase subunit 1 OS=Mus musculus (Mouse) OX=10090 GN=Dpm1 PE=1 SV=1	DPM1	12.2063	12.5238	11.9766	11.9064	12.4239	11.7901	11.9826	11.9446	12.3551	11.597	12.0302	12.2348
Q9D1Q4	>sp|Q9D1Q4|DPM3_MOUSE Dolichol-phosphate mannosyltransferase subunit 3 OS=Mus musculus (Mouse) OX=10090 GN=Dpm3 PE=1 SV=1	DPM3	12.542	11.7538	12.7675	11.895	12.0049	12.0402	11.9425	11.2783	12.4445	11.884	12.3651	11.9108
Q99KK7	>sp|Q99KK7|DPP3_MOUSE Dipeptidyl peptidase 3 OS=Mus musculus (Mouse) OX=10090 GN=Dpp3 PE=1 SV=2	DPP3	11.6216	11.5212	11.6405	11.3048	11.6376	11.6185	11.6567	11.9494	11.4385	11.5203	11.4576	11.5508
Q9ET22	>sp|Q9ET22|DPP2_MOUSE Dipeptidyl peptidase 2 OS=Mus musculus (Mouse) OX=10090 GN=Dpp7 PE=1 SV=2	DPP7	12.1734	12.1063	12.7228	12.1047	12.5316	12.3287	12.3228	12.1599	12.0846	11.7807	11.956	12.1858
A6X919	>sp|A6X919|D19L1_MOUSE Probable C-mannosyltransferase DPY19L1 OS=Mus musculus (Mouse) OX=10090 GN=Dpy19l1 PE=1 SV=1	DPY19L1	10.7329	10.8959	11.4265	11.1008	11.1516		10.9495	10.9973	10.7775	10.9978	11.0879	10.8793
O08553	>sp|O08553|DPYL2_MOUSE Dihydropyrimidinase-related protein 2 OS=Mus musculus (Mouse) OX=10090 GN=Dpysl2 PE=1 SV=2	DPYSL2	13.0026	12.8167	12.9616	12.8901	12.7984	13.314	12.9966	13.1651	12.6334	12.6933	12.4582	12.7227
O35098	>sp|O35098|DPYL4_MOUSE Dihydropyrimidinase-related protein 4 OS=Mus musculus (Mouse) OX=10090 GN=Dpysl4 PE=1 SV=1	DPYSL4	14.1548	13.862	14.053	13.603	13.1466	13.4141	14.1705	14.3236	13.7636	13.7448	12.7729	13.5682
Q91WV0	>sp|Q91WV0|NC2B_MOUSE Protein Dr1 OS=Mus musculus (Mouse) OX=10090 GN=Dr1 PE=1 SV=1	DR1	11.8778	11.7066		10.5014	10.4046	11.22	11.5478	12.0713	11.9274	11.0513	11.7403	11.3971
Q9D6N5	>sp|Q9D6N5|NC2A_MOUSE Dr1-associated corepressor OS=Mus musculus (Mouse) OX=10090 GN=Drap1 PE=1 SV=3	DRAP1	11.1033	10.6751	11.2949	10.158	10.8483	11.8301	11.0988	11.1785	11.1195	12.324	11.916	11.4338
P32233	>sp|P32233|DRG1_MOUSE Developmentally-regulated GTP-binding protein 1 OS=Mus musculus (Mouse) OX=10090 GN=Drg1 PE=1 SV=1	DRG1	10.7625	11.1641	10.9968	10.4376	10.7724	10.7904	10.7494	10.7561	10.8077	10.9977	11.0035	10.5324
Q9QXB9	>sp|Q9QXB9|DRG2_MOUSE Developmentally-regulated GTP-binding protein 2 OS=Mus musculus (Mouse) OX=10090 GN=Drg2 PE=1 SV=1	DRG2	11.6162	11.8093	11.6635	10.1906	11.7957	11.1567	11.2797	11.6159	11.6721	11.578	11.1722	11.3214
E9Q557	>sp|E9Q557|DESP_MOUSE Desmoplakin OS=Mus musculus (Mouse) OX=10090 GN=Dsp PE=1 SV=1	DSP	10.8616	10.679	11.4717	12.4976	10.8759	10.9781	11.0818	11.2042	10.7934	11.4593	10.4307	11.0026
Q9R0P5	>sp|Q9R0P5|DEST_MOUSE Destrin OS=Mus musculus (Mouse) OX=10090 GN=Dstn PE=1 SV=3	DSTN	12.8007	12.7353	12.3404	12.3842	12.1355	12.3686	12.6181	12.528	12.2027	12.3488	11.9852	12.3339
Q9DD18	>sp|Q9DD18|DTD1_MOUSE D-aminoacyl-tRNA deacylase 1 OS=Mus musculus (Mouse) OX=10090 GN=Dtd1 PE=1 SV=2	DTD1	10.0022	9.83221	10.6269		9.84441	9.7922	9.37708	9.07159	9.63245	10.2528	10.4768	10.0754
Q8BHA3	>sp|Q8BHA3|DTD2_MOUSE D-aminoacyl-tRNA deacylase 2 OS=Mus musculus (Mouse) OX=10090 GN=Dtd2 PE=1 SV=1	DTD2	9.84477	9.83711	10.695	10.445	9.85831	10.3328
Q9D2N4	>sp|Q9D2N4|DTNA_MOUSE Dystrobrevin alpha OS=Mus musculus (Mouse) OX=10090 GN=Dtna PE=1 SV=2	DTNA	10.3519	10.6691		10.132	10.2856	10.0565
O70585	>sp|O70585|DTNB_MOUSE Dystrobrevin beta OS=Mus musculus (Mouse) OX=10090 GN=Dtnb PE=1 SV=3	DTNB	11.3135	10.7541	12.1814	11.5132	10.9199	11.8274	10.7782	10.8777	11.1862	11.6014	11.2122	11.471
Q3UIR3	>sp|Q3UIR3|DTX3L_MOUSE E3 ubiquitin-protein ligase DTX3L OS=Mus musculus (Mouse) OX=10090 GN=Dtx3l PE=1 SV=1	DTX3L	9.99693	9.75744	10.3777	9.76949	10.3585	10.6086
P97930	>sp|P97930|KTHY_MOUSE Thymidylate kinase OS=Mus musculus (Mouse) OX=10090 GN=Dtymk PE=1 SV=2	DTYMK	12.1021	12.3159	12.5889	12.5993	12.7619	12.1854	12.2975	12.1149	12.7183	12.8521	13.0188	12.564
Q91XI1	>sp|Q91XI1|DUS3L_MOUSE tRNA-dihydrouridine(47) synthase [NAD(P)(+)]-like OS=Mus musculus (Mouse) OX=10090 GN=Dus3l PE=1 SV=1	DUS3L	10.1914	10.4864	10.2677	10.3729	9.88444	10.2739	10.4077	10.4367	10.4284	10.3373	10.3338	9.99617
Q9D7X3	>sp|Q9D7X3|DUS3_MOUSE Dual specificity protein phosphatase 3 OS=Mus musculus (Mouse) OX=10090 GN=Dusp3 PE=1 SV=1	DUSP3	11.079	11.1118	10.8509	10.0383	10.6277	10.1155	11.0765	11.0587	10.8851	11.1027	10.8364	10.8999
Q8VCG1	>tr|Q8VCG1|Q8VCG1_MOUSE dUTPase domain-containing protein OS=Mus musculus (Mouse) OX=10090 GN=Dut PE=1 SV=1	DUT	10.5935	10.8745	11.3778	10.3132	10.5271	10.5443	10.7256	11.0571	10.99	11.0811	11.0232	10.9478
Q9JHU4	>sp|Q9JHU4|DYHC1_MOUSE Cytoplasmic dynein 1 heavy chain 1 OS=Mus musculus (Mouse) OX=10090 GN=Dync1h1 PE=1 SV=2	DYNC1H1	12.0288	11.8435	10.6503	11.816	11.6968	12.0081	11.938	12.0858	11.8819	11.8511	11.7492	11.8697
O88487	>sp|O88487|DC1I2_MOUSE Cytoplasmic dynein 1 intermediate chain 2 OS=Mus musculus (Mouse) OX=10090 GN=Dync1i2 PE=1 SV=1	DYNC1I2	10.9389	10.753	10.7768	10.8761	10.5749	10.8663	10.666	10.8505	10.5188	10.9517	10.6752	10.7145
Q8R1Q8	>sp|Q8R1Q8|DC1L1_MOUSE Cytoplasmic dynein 1 light intermediate chain 1 OS=Mus musculus (Mouse) OX=10090 GN=Dync1li1 PE=1 SV=1	DYNC1LI1	11.2959	11.0249	10.8967	10.9978	10.953	11.5195	11.0373	10.9143	10.9634	10.8467	11.279	11.059
Q6PDL0	>sp|Q6PDL0|DC1L2_MOUSE Cytoplasmic dynein 1 light intermediate chain 2 OS=Mus musculus (Mouse) OX=10090 GN=Dync1li2 PE=1 SV=2	DYNC1LI2	11.217	11.0297	11.207	11.6453	11.2321	11.3861	11.1941	11.2405	11.2018	11.1975	11.1817	11.3672
P63168;Q9D0M5	>sp|P63168|DYL1_MOUSE Dynein light chain 1, cytoplasmic OS=Mus musculus (Mouse) OX=10090 GN=Dynll1 PE=1 SV=1;>sp|Q9D0M5|DYL2_MOUSE Dynein light chain 2, cytoplasmic OS=Mus musculus (Mouse) OX=10090 GN=Dynll2 PE=1 SV=1	DYNLL1;DYNLL2	12.5618	12.1797	12.2669	12.078	10.4044	11.58	12.3217	12.2397	12.2046	12.1728	11.4865	12.1193
P62627	>sp|P62627|DLRB1_MOUSE Dynein light chain roadblock-type 1 OS=Mus musculus (Mouse) OX=10090 GN=Dynlrb1 PE=1 SV=3	DYNLRB1	11.7039	11.0115	11.0806	9.88874	10.7366	10.203	10.8542	10.9667	11.4008	10.3492	9.25121	10.5214
Q9CXJ1	>sp|Q9CXJ1|SYEM_MOUSE Probable glutamate--tRNA ligase, mitochondrial OS=Mus musculus (Mouse) OX=10090 GN=Ears2 PE=1 SV=1	EARS2	10.1773	10.5629	10.6269	10.5262	10.3337	10.3172	10.6707	10.6965	10.6233	10.448	10.7349	10.4178
Q9D0V7	>sp|Q9D0V7|RCAS1_MOUSE Receptor-binding cancer antigen expressed on SiSo cells OS=Mus musculus (Mouse) OX=10090 GN=Ebag9 PE=1 SV=2	EBAG9	10.7876	10.6237		11.2438	11.3052	10.8809	11.2894	10.8728	10.7697	11.3572	10.6939	11.0576
Q9D903	>sp|Q9D903|EBP2_MOUSE Probable rRNA-processing protein EBP2 OS=Mus musculus (Mouse) OX=10090 GN=Ebna1bp2 PE=2 SV=1	EBNA1BP2	11.0606	10.4235	11.2049	11.4068	11.3198	10.4123
P70245	>sp|P70245|EBP_MOUSE 3-beta-hydroxysteroid-Delta(8),Delta(7)-isomerase OS=Mus musculus (Mouse) OX=10090 GN=Ebp PE=1 SV=3	EBP	11.7108	12.0954	12.5295	11.6349	12.3932	12.082	12.0233	11.8768	12.0264	12.2326	12.356	11.9818
Q4PZA2	>sp|Q4PZA2|ECE1_MOUSE Endothelin-converting enzyme 1 OS=Mus musculus (Mouse) OX=10090 GN=Ece1 PE=1 SV=1	ECE1	11.1555	11.291	11.1478	10.516	10.9664	10.856	10.8876	11.0252	10.729	10.2824	11.3048	10.6905
O35459	>sp|O35459|ECH1_MOUSE Delta(3,5)-Delta(2,4)-dienoyl-CoA isomerase, mitochondrial OS=Mus musculus (Mouse) OX=10090 GN=Ech1 PE=1 SV=1	ECH1	13.1708	13.5293	13.6149	13.6607	13.8414	13.2462	12.8393	12.6708	13.1953	13.0617	13.2647	13.2797
Q9D9V3	>sp|Q9D9V3|ECHD1_MOUSE Ethylmalonyl-CoA decarboxylase OS=Mus musculus (Mouse) OX=10090 GN=Echdc1 PE=1 SV=2	ECHDC1	12.1013	12.3407	12.4737	12.5584	12.4167	11.8135	12.341	12.0348	12.6587	11.9234	12.4452	12.3935
Q3TLP5	>sp|Q3TLP5|ECHD2_MOUSE Enoyl-CoA hydratase domain-containing protein 2, mitochondrial OS=Mus musculus (Mouse) OX=10090 GN=Echdc2 PE=1 SV=2	ECHDC2	11.8525	11.2262	11.0235	11.8331	11.7403	12.1299	11.5232	11.78	11.2488	11.7095	11.805	11.1887
Q9D7J9	>sp|Q9D7J9|ECHD3_MOUSE Enoyl-CoA hydratase domain-containing protein 3, mitochondrial OS=Mus musculus (Mouse) OX=10090 GN=Echdc3 PE=1 SV=1	ECHDC3	12.8161	13.1474	13.2731	13.3146	13.3223	12.7399	13.4115	13.2771	13.8665	13.5638	13.6347	13.6041
Q8BH95	>sp|Q8BH95|ECHM_MOUSE Enoyl-CoA hydratase, mitochondrial OS=Mus musculus (Mouse) OX=10090 GN=Echs1 PE=1 SV=1	ECHS1	14.0688	14.2485	14.2385	14.3886	14.3699	13.9947	14.3084	14.1914	14.6059	14.3568	14.6793	14.4731
P42125	>sp|P42125|ECI1_MOUSE Enoyl-CoA delta isomerase 1, mitochondrial OS=Mus musculus (Mouse) OX=10090 GN=Eci1 PE=1 SV=2	ECI1	13.3314	13.5157	13.6259	13.6994	13.8939	13.4056	13.7843	13.5379	13.816	13.7777	14.013	14.0697
Q9WUR2	>sp|Q9WUR2|ECI2_MOUSE Enoyl-CoA delta isomerase 2, mitochondrial OS=Mus musculus (Mouse) OX=10090 GN=Eci2 PE=1 SV=2	ECI2	12.5968	12.919	12.8884	12.9223	13.0345	12.7578	12.9637	12.5977	13.0307	12.7846	13.1058	13.1529
Q61508	>sp|Q61508|ECM1_MOUSE Extracellular matrix protein 1 OS=Mus musculus (Mouse) OX=10090 GN=Ecm1 PE=1 SV=2	ECM1	11.4476	11.1988	12.1263	11.9987	12.1655	11.544	11.3959	10.9712	11.3138	11.331	11.3629	11.487
Q6PDI5	>sp|Q6PDI5|ECM29_MOUSE Proteasome adapter and scaffold protein ECM29 OS=Mus musculus (Mouse) OX=10090 GN=Ecpas PE=1 SV=3	ECPAS	10.9077	10.8482	10.6272	11.0043	10.8125	10.9769	10.683	10.881	10.5858	10.5084	10.8777	10.4731
Q9QZH6	>sp|Q9QZH6|ECSIT_MOUSE Evolutionarily conserved signaling intermediate in Toll pathway, mitochondrial OS=Mus musculus (Mouse) OX=10090 GN=Ecsit PE=1 SV=2	ECSIT	12.2449	12.2541	12.7586	12.9346	12.3727	12.3132	12.1661	12.0702	12.7046	12.6725	12.7949	12.8381
Q3UJB9	>sp|Q3UJB9|EDC4_MOUSE Enhancer of mRNA-decapping protein 4 OS=Mus musculus (Mouse) OX=10090 GN=Edc4 PE=1 SV=2	EDC4	11.2267	11.2727	10.9411	10.3999	10.9123	10.862	11.085	11.007	11.1954	10.9443	10.8497	11.1401
Q2HXL6	>sp|Q2HXL6|EDEM3_MOUSE ER degradation-enhancing alpha-mannosidase-like protein 3 OS=Mus musculus (Mouse) OX=10090 GN=Edem3 PE=1 SV=2	EDEM3	11.7653	11.8227	11.5298	11.6446	11.6482	11.397	11.3671	11.6139	11.5567	11.1591	11.277	11.2218
Q8BL66	>sp|Q8BL66|EEA1_MOUSE Early endosome antigen 1 OS=Mus musculus (Mouse) OX=10090 GN=Eea1 PE=1 SV=2	EEA1	10.686	10.6354	11.0216	10.9195	10.7309	10.7528	10.6531	10.8778	10.5482	10.6982	10.9447	10.5943
P10126	>sp|P10126|EF1A1_MOUSE Elongation factor 1-alpha 1 OS=Mus musculus (Mouse) OX=10090 GN=Eef1a1 PE=1 SV=3	EEF1A1	15.4039	15.1738	15.5126	15.6246	15.2778	15.723	15.0796	15.1307	14.8969	15.2404	15.1428	15.0914
O70251	>sp|O70251|EF1B_MOUSE Elongation factor 1-beta OS=Mus musculus (Mouse) OX=10090 GN=Eef1b PE=1 SV=5	EEF1B	13.1161	12.9778	12.4361	12.5889	12.8745	13.2671	12.2835	12.8638	12.2461	11.9768	12.3297	12.5667
P57776	>sp|P57776|EF1D_MOUSE Elongation factor 1-delta OS=Mus musculus (Mouse) OX=10090 GN=Eef1d PE=1 SV=3	EEF1D	12.5658	12.4321	12.5598	12.5536	12.4638	12.9694	12.593	12.3808	12.2386	12.3666	12.3579	12.4092
Q9D1M4	>sp|Q9D1M4|MCA3_MOUSE Eukaryotic translation elongation factor 1 epsilon-1 OS=Mus musculus (Mouse) OX=10090 GN=Eef1e1 PE=1 SV=1	EEF1E1	10.9806	10.8545	11.6903	10.8781	11.0182	11.3503	10.9742	10.7985	10.9327	11.5574	11.2144	11.1926
Q9D8N0	>sp|Q9D8N0|EF1G_MOUSE Elongation factor 1-gamma OS=Mus musculus (Mouse) OX=10090 GN=Eef1g PE=1 SV=3	EEF1G	13.7007	13.503	13.6648	13.6925	13.5847	14.0266	13.3878	13.5078	13.1057	13.2987	13.2048	13.3533
P58252	>sp|P58252|EF2_MOUSE Elongation factor 2 OS=Mus musculus (Mouse) OX=10090 GN=Eef2 PE=1 SV=2	EEF2	13.9565	13.7303	13.8426	13.9138	13.8013	14.2731	13.5803	13.6997	13.3223	13.5353	13.4519	13.4915
Q3TGW2	>sp|Q3TGW2|EEPD1_MOUSE Endonuclease/exonuclease/phosphatase family domain-containing protein 1 OS=Mus musculus (Mouse) OX=10090 GN=Eepd1 PE=1 SV=1	EEPD1							8.84854	8.88215	8.90786	9.68073		9.45187
Q9D4J1	>sp|Q9D4J1|EFHD1_MOUSE EF-hand domain-containing protein D1 OS=Mus musculus (Mouse) OX=10090 GN=Efhd1 PE=1 SV=1	EFHD1	12.9281	12.8155	12.4228	12.3564	12.2122	12.2676	12.6926	12.9739	12.5891	12.519	12.4776	12.486
Q9D4J1;Q9D8Y0	>sp|Q9D4J1|EFHD1_MOUSE EF-hand domain-containing protein D1 OS=Mus musculus (Mouse) OX=10090 GN=Efhd1 PE=1 SV=1;>sp|Q9D8Y0|EFHD2_MOUSE EF-hand domain-containing protein D2 OS=Mus musculus (Mouse) OX=10090 GN=Efhd2 PE=1 SV=1	EFHD1;EFHD2	12.0772	12.2539	11.8882	11.8697	11.9462	11.9908	12.3925	12.4173	12.2581	11.2599	12.0287	12.306
Q9D8Y0	>sp|Q9D8Y0|EFHD2_MOUSE EF-hand domain-containing protein D2 OS=Mus musculus (Mouse) OX=10090 GN=Efhd2 PE=1 SV=1	EFHD2	11.5154	11.4005	11.4368	11.6564	10.871	11.1826	11.3054	11.0506	11.1882	11.4728	11.4423	10.8914
Q8C0D5	>sp|Q8C0D5|EFL1_MOUSE Elongation factor-like GTPase 1 OS=Mus musculus (Mouse) OX=10090 GN=Efl1 PE=1 SV=1	EFL1	12.0399	10.4505	12.3025		11.4882	10.7353
P52801	>sp|P52801|EFNA2_MOUSE Ephrin-A2 OS=Mus musculus (Mouse) OX=10090 GN=Efna2 PE=1 SV=1	EFNA2	13.193	13.1804	13.9738	13.5587	13.172	12.383	12.7088	12.7981	12.6871	13.4102	13.218	12.6286
P52795	>sp|P52795|EFNB1_MOUSE Ephrin-B1 OS=Mus musculus (Mouse) OX=10090 GN=Efnb1 PE=1 SV=1	EFNB1	10.1338	10.8035	10.0138	10.9078	10.4067	10.1934	10.1506	9.51732	9.77052	9.11771	9.85196	9.80733
Q8BG67	>sp|Q8BG67|EFR3A_MOUSE Protein EFR3 homolog A OS=Mus musculus (Mouse) OX=10090 GN=Efr3a PE=1 SV=1	EFR3A	11.4262	11.4284	11.5715	11.5976	11.4316	11.6083	11.5956	11.2294	11.5212	11.4116	11.4016	11.4161
O08810	>sp|O08810|U5S1_MOUSE 116 kDa U5 small nuclear ribonucleoprotein component OS=Mus musculus (Mouse) OX=10090 GN=Eftud2 PE=1 SV=1	EFTUD2	11.6534	11.571	11.6656	11.7977	11.7762	11.6627	11.5309	11.6454	11.5687	11.4455	11.7644	11.5335
O08810;P58252	>sp|O08810|U5S1_MOUSE 116 kDa U5 small nuclear ribonucleoprotein component OS=Mus musculus (Mouse) OX=10090 GN=Eftud2 PE=1 SV=1;>sp|P58252|EF2_MOUSE Elongation factor 2 OS=Mus musculus (Mouse) OX=10090 GN=Eef2 PE=1 SV=2	EFTUD2;EEF2	16.7019	16.2503	16.6968	16.761	16.3033	17.0373	16.2833	16.5379	15.9616	16.3832	16.0742	16.2117
Q01279	>sp|Q01279|EGFR_MOUSE Epidermal growth factor receptor OS=Mus musculus (Mouse) OX=10090 GN=Egfr PE=1 SV=1	EGFR	9.43903	9.80338	9.66243	9.4817	9.84331
Q9WVK4	>sp|Q9WVK4|EHD1_MOUSE EH domain-containing protein 1 OS=Mus musculus (Mouse) OX=10090 GN=Ehd1 PE=1 SV=1	EHD1	11.8873	11.8381	11.7436	11.5835	11.5347	11.8075	11.5515	11.6591	11.6828	11.3582	11.5677	11.4915
Q8BH64	>sp|Q8BH64|EHD2_MOUSE EH domain-containing protein 2 OS=Mus musculus (Mouse) OX=10090 GN=Ehd2 PE=1 SV=1	EHD2	12.8783	12.1579	12.4725	12.3373	12.1371	12.3465	11.3502	11.7902	10.7893	11.2918	11.4352	10.5212
Q8BH64;Q9WVK4	>sp|Q8BH64|EHD2_MOUSE EH domain-containing protein 2 OS=Mus musculus (Mouse) OX=10090 GN=Ehd2 PE=1 SV=1;>sp|Q9WVK4|EHD1_MOUSE EH domain-containing protein 1 OS=Mus musculus (Mouse) OX=10090 GN=Ehd1 PE=1 SV=1	EHD2;EHD1	12.9446	12.6831	11.9428	12.1366	12.8659	13.1861	12.4203	11.7752	11.6977	11.2858	12.198	12.1743
Q9QXY6	>sp|Q9QXY6|EHD3_MOUSE EH domain-containing protein 3 OS=Mus musculus (Mouse) OX=10090 GN=Ehd3 PE=1 SV=2	EHD3	11.5858	10.7806	11.346		11.1501	11.5707	11.0227	10.9125	10.7879	10.6922	11.0903	10.8981
Q9QXY6;Q9WVK4	>sp|Q9QXY6|EHD3_MOUSE EH domain-containing protein 3 OS=Mus musculus (Mouse) OX=10090 GN=Ehd3 PE=1 SV=2;>sp|Q9WVK4|EHD1_MOUSE EH domain-containing protein 1 OS=Mus musculus (Mouse) OX=10090 GN=Ehd1 PE=1 SV=1	EHD3;EHD1	12.1334	11.6926	11.3955	10.9306	11.7437	11.5592	11.2404	11.2687	11.1998	11.5107	11.225	11.1297
Q9EQP2	>sp|Q9EQP2|EHD4_MOUSE EH domain-containing protein 4 OS=Mus musculus (Mouse) OX=10090 GN=Ehd4 PE=1 SV=1	EHD4	11.5942	11.7613	11.3143	11.5886	11.3287	11.5016	11.2669	11.0957	11.1781	10.9299	11.2193	11.0101
Q9EQP2;Q9QXY6	>sp|Q9EQP2|EHD4_MOUSE EH domain-containing protein 4 OS=Mus musculus (Mouse) OX=10090 GN=Ehd4 PE=1 SV=1;>sp|Q9QXY6|EHD3_MOUSE EH domain-containing protein 3 OS=Mus musculus (Mouse) OX=10090 GN=Ehd3 PE=1 SV=2	EHD4;EHD3	11.9081	11.4222	12.0988		10.3828	10.5191	10.6201	10.3358	10.3783	11.5592	10.7397	10.8715
Q9EQP2;Q9QXY6;Q9WVK4	>sp|Q9EQP2|EHD4_MOUSE EH domain-containing protein 4 OS=Mus musculus (Mouse) OX=10090 GN=Ehd4 PE=1 SV=1;>sp|Q9QXY6|EHD3_MOUSE EH domain-containing protein 3 OS=Mus musculus (Mouse) OX=10090 GN=Ehd3 PE=1 SV=2;>sp|Q9WVK4|EHD1_MOUSE EH domain-containing protein 1 OS=Mus musculus (Mouse) OX=10090 GN=Ehd1 PE=1 SV=1	EHD4;EHD3;EHD1	12.8229	13.1014	12.5954	12.1163	12.8263	12.8509	12.5339	12.5038	12.3419	12.6877	12.6445	11.7412
Q9DBM2	>sp|Q9DBM2|ECHP_MOUSE Peroxisomal bifunctional enzyme OS=Mus musculus (Mouse) OX=10090 GN=Ehhadh PE=1 SV=4	EHHADH	10.8768	11.0325	11.2169	11.2701	11.3213	10.9603	11.2519	10.8286	11.4975	10.7723	11.321	10.983
Q61070	>sp|Q61070|EI24_MOUSE Etoposide-induced protein 2.4 OS=Mus musculus (Mouse) OX=10090 GN=Ei24 PE=1 SV=3	EI24	12.6821	12.2396	12.2345		12.3555	12.552	12.2967	12.477	12.7964	11.7498	12.4129	12.056
Q9DCR4	>sp|Q9DCR4|EID1_MOUSE EP300-interacting inhibitor of differentiation 1 OS=Mus musculus (Mouse) OX=10090 GN=Eid1 PE=1 SV=2	EID1							11.2582	11.4401	10.6487		11.2466	11.2254
P48024;Q9CXU9	>sp|P48024|EIF1_MOUSE Eukaryotic translation initiation factor 1 OS=Mus musculus (Mouse) OX=10090 GN=Eif1 PE=1 SV=2;>sp|Q9CXU9|EIF1B_MOUSE Eukaryotic translation initiation factor 1b OS=Mus musculus (Mouse) OX=10090 GN=Eif1b PE=1 SV=2	EIF1;EIF1B	11.8128	11.3558	11.8043	11.2958	10.8599	11.3902	11.2583	11.0795	11.5315	11.9422	11.3749	11.4754
Q60872;Q8BMJ3	>sp|Q60872|IF1A_MOUSE Eukaryotic translation initiation factor 1A OS=Mus musculus (Mouse) OX=10090 GN=Eif1a PE=2 SV=3;>sp|Q8BMJ3|IF1AX_MOUSE Eukaryotic translation initiation factor 1A, X-chromosomal OS=Mus musculus (Mouse) OX=10090 GN=Eif1ax PE=2 SV=3	EIF1A;EIF1AX	11.7644	11.4557	11.233	11.4011	11.1568	11.24	11.288	11.1751	11.2077	11.245	11.2702	11.5166
Q8BJW6	>sp|Q8BJW6|EIF2A_MOUSE Eukaryotic translation initiation factor 2A OS=Mus musculus (Mouse) OX=10090 GN=Eif2a PE=1 SV=2	EIF2A	11.542	11.4286	11.3668	11.4666	11.4071	11.8033	11.5438	11.6732	11.3058	11.3593	11.0668	11.409
Q03963	>sp|Q03963|E2AK2_MOUSE Interferon-induced, double-stranded RNA-activated protein kinase OS=Mus musculus (Mouse) OX=10090 GN=Eif2ak2 PE=1 SV=2	EIF2AK2	10.5632	11.0994	10.9727	12.0376	11.5084	11.6498
Q99LC8	>sp|Q99LC8|EI2BA_MOUSE Translation initiation factor eIF-2B subunit alpha OS=Mus musculus (Mouse) OX=10090 GN=Eif2b1 PE=1 SV=1	EIF2B1	9.38071	9.35502	10.3804		9.90313	9.8737
B1AUN2	>tr|B1AUN2|B1AUN2_MOUSE Eukaryotic translation initiation factor 2B, subunit 3 OS=Mus musculus (Mouse) OX=10090 GN=Eif2b3 PE=1 SV=1	EIF2B3	11.3386	11.4968	11.2849	10.971	11.1714	11.6692	10.876	11.4788	11.095	10.8101	11.2393	10.7502
Q61749	>sp|Q61749|EI2BD_MOUSE Translation initiation factor eIF-2B subunit delta OS=Mus musculus (Mouse) OX=10090 GN=Eif2b4 PE=1 SV=2	EIF2B4	10.9974	10.8206	10.6112	11.1625	11.2121	11.2912	10.8111	11.1229	10.8969	11.1313	11.185	10.9997
Q8CHW4	>sp|Q8CHW4|EI2BE_MOUSE Translation initiation factor eIF-2B subunit epsilon OS=Mus musculus (Mouse) OX=10090 GN=Eif2b5 PE=1 SV=1	EIF2B5	11.8722	11.6095	11.3715	10.6345	11.809	12.1916	11.5229	11.923	11.2714	12.0656	11.0523	11.4888
Q6ZWX6	>sp|Q6ZWX6|IF2A_MOUSE Eukaryotic translation initiation factor 2 subunit 1 OS=Mus musculus (Mouse) OX=10090 GN=Eif2s1 PE=1 SV=3	EIF2S1	12.3899	12.2706	12.375	12.5801	12.4589	12.794	12.4126	12.3292	12.0334	12.5925	12.2027	12.2759
Q99L45	>sp|Q99L45|IF2B_MOUSE Eukaryotic translation initiation factor 2 subunit 2 OS=Mus musculus (Mouse) OX=10090 GN=Eif2s2 PE=1 SV=1	EIF2S2	12.1429	11.8988	11.6359	11.3883	11.5501	11.8802	11.8802	11.6842	11.8668	11.4852	11.5456	11.5835
Q9Z0N1	>sp|Q9Z0N1|IF2G_MOUSE Eukaryotic translation initiation factor 2 subunit 3, X-linked OS=Mus musculus (Mouse) OX=10090 GN=Eif2s3x PE=1 SV=2	EIF2S3X	11.2736	11.1588	11.3441	11.6941	11.161	11.7337	10.9957	11.1404	11.0177	11.7139	11.4603	11.0623
Q9Z0N1;Q9Z0N2	>sp|Q9Z0N1|IF2G_MOUSE Eukaryotic translation initiation factor 2 subunit 3, X-linked OS=Mus musculus (Mouse) OX=10090 GN=Eif2s3x PE=1 SV=2;>sp|Q9Z0N2|IF2H_MOUSE Eukaryotic translation initiation factor 2 subunit 3, Y-linked OS=Mus musculus (Mouse) OX=10090 GN=Eif2s3y PE=1 SV=2	EIF2S3X;EIF2S3Y	12.2973	12.1655	12.5945	12.3427	12.3188	12.9119	12.1946	12.1757	11.9475	12.2363	12.4322	12.1283
Q9Z0N2	>sp|Q9Z0N2|IF2H_MOUSE Eukaryotic translation initiation factor 2 subunit 3, Y-linked OS=Mus musculus (Mouse) OX=10090 GN=Eif2s3y PE=1 SV=2	EIF2S3Y	8.34752		10.1527	10.7909	9.63903	10.0061	9.44901	8.80966	9.46522	9.64267	10.2951
P23116	>sp|P23116|EIF3A_MOUSE Eukaryotic translation initiation factor 3 subunit A OS=Mus musculus (Mouse) OX=10090 GN=Eif3a PE=1 SV=5	EIF3A	12.0119	11.8137	11.6499	11.621	11.6995	11.9036	11.8034	11.8393	11.505	11.5456	11.6057	11.6533
Q8JZQ9	>sp|Q8JZQ9|EIF3B_MOUSE Eukaryotic translation initiation factor 3 subunit B OS=Mus musculus (Mouse) OX=10090 GN=Eif3b PE=1 SV=1	EIF3B	12.218	11.9047	11.8664	11.8614	12.0326	12.2729	11.8821	12.0213	11.7188	11.6034	11.7153	11.7966
Q8R1B4	>sp|Q8R1B4|EIF3C_MOUSE Eukaryotic translation initiation factor 3 subunit C OS=Mus musculus (Mouse) OX=10090 GN=Eif3c PE=1 SV=1	EIF3C	11.8191	11.5981	11.6073	11.8793	11.563	12.1946	11.7512	11.8193	11.5128	11.2424	11.5438	11.5958
O70194	>sp|O70194|EIF3D_MOUSE Eukaryotic translation initiation factor 3 subunit D OS=Mus musculus (Mouse) OX=10090 GN=Eif3d PE=1 SV=2	EIF3D	11.8984	11.6651	11.8228	11.7076	11.7378	12.0321	11.7863	11.6043	11.5272	11.6973	11.7852	11.6221
P60229	>sp|P60229|EIF3E_MOUSE Eukaryotic translation initiation factor 3 subunit E OS=Mus musculus (Mouse) OX=10090 GN=Eif3e PE=1 SV=1	EIF3E	12.0146	11.8702	11.6776	12.0492	11.7934	12.1673	11.6154	11.6707	11.5055	11.648	11.6645	11.6463
Q9DCH4	>sp|Q9DCH4|EIF3F_MOUSE Eukaryotic translation initiation factor 3 subunit F OS=Mus musculus (Mouse) OX=10090 GN=Eif3f PE=1 SV=2	EIF3F	12.2523	12.2653	12.0379	12.3046	12.1956	12.5093	12.1836	12.2656	11.8476	11.9998	11.7885	12.0439
Q9Z1D1	>sp|Q9Z1D1|EIF3G_MOUSE Eukaryotic translation initiation factor 3 subunit G OS=Mus musculus (Mouse) OX=10090 GN=Eif3g PE=1 SV=2	EIF3G	12.0049	12.006	11.5341	11.8944	11.6971	11.9604	11.9151	12.1577	11.788	11.2962	11.6653	11.6945
Q91WK2	>sp|Q91WK2|EIF3H_MOUSE Eukaryotic translation initiation factor 3 subunit H OS=Mus musculus (Mouse) OX=10090 GN=Eif3h PE=1 SV=1	EIF3H	11.9482	11.6358	11.9086	12.1262	11.7204	11.9996	11.7138	11.8381	11.5238	12.0448	11.732	11.8204
Q9QZD9	>sp|Q9QZD9|EIF3I_MOUSE Eukaryotic translation initiation factor 3 subunit I OS=Mus musculus (Mouse) OX=10090 GN=Eif3i PE=1 SV=1	EIF3I	11.6014	11.5962	11.7065	11.6683	11.4085	11.8666	11.697	11.4531	11.1979	11.9152	11.437	11.5209
Q3UGC7;Q66JS6	>sp|Q3UGC7|EI3JA_MOUSE Eukaryotic translation initiation factor 3 subunit J-A OS=Mus musculus (Mouse) OX=10090 GN=Eif3j1 PE=2 SV=1;>sp|Q66JS6|EI3JB_MOUSE Eukaryotic translation initiation factor 3 subunit J-B OS=Mus musculus (Mouse) OX=10090 GN=Eif3j2 PE=1 SV=1	EIF3J1;EIF3J2	11.4692	11.3581	11.7459	11.6749	11.2405	11.7583	11.4725	11.0349	11.1631	11.2846	11.1186	11.361
Q9DBZ5	>sp|Q9DBZ5|EIF3K_MOUSE Eukaryotic translation initiation factor 3 subunit K OS=Mus musculus (Mouse) OX=10090 GN=Eif3k PE=1 SV=1	EIF3K	13.0972	12.9086	12.4272	12.6533	12.9249	12.9217	12.5224	12.9204	12.3821	12.2895	12.4958	12.288
Q8QZY1	>sp|Q8QZY1|EIF3L_MOUSE Eukaryotic translation initiation factor 3 subunit L OS=Mus musculus (Mouse) OX=10090 GN=Eif3l PE=1 SV=1	EIF3L	11.8705	11.7842	11.5378	12.0455	11.77	12.1214	11.8269	11.9101	11.6	11.8086	11.7841	11.6973
Q99JX4	>sp|Q99JX4|EIF3M_MOUSE Eukaryotic translation initiation factor 3 subunit M OS=Mus musculus (Mouse) OX=10090 GN=Eif3m PE=1 SV=1	EIF3M	11.0363	10.6981	10.9118	10.302	10.8901	10.6849	10.8548	10.668	10.2879	10.0265	10.3402	10.1995
P60843	>sp|P60843|IF4A1_MOUSE Eukaryotic initiation factor 4A-I OS=Mus musculus (Mouse) OX=10090 GN=Eif4a1 PE=1 SV=1	EIF4A1	12.5026	12.2626	12.2778	12.1551	12.4794	12.7925	12.0573	12.1917	11.8889	11.544	11.9718	12.0694
P10630	>sp|P10630|IF4A2_MOUSE Eukaryotic initiation factor 4A-II OS=Mus musculus (Mouse) OX=10090 GN=Eif4a2 PE=1 SV=2	EIF4A2	11.7628	11.6041	11.9245	12.0091	11.5516	11.99	11.8579	12.0363	11.877	11.6854	11.9521	11.8413
P10630;P60843	>sp|P10630|IF4A2_MOUSE Eukaryotic initiation factor 4A-II OS=Mus musculus (Mouse) OX=10090 GN=Eif4a2 PE=1 SV=2;>sp|P60843|IF4A1_MOUSE Eukaryotic initiation factor 4A-I OS=Mus musculus (Mouse) OX=10090 GN=Eif4a1 PE=1 SV=1	EIF4A2;EIF4A1	13.8962	13.6286	14.0273	13.8098	13.747	14.0938	13.5859	13.7321	13.2753	13.5133	13.3499	13.4544
P10630;P60843;Q91VC3	>sp|P10630|IF4A2_MOUSE Eukaryotic initiation factor 4A-II OS=Mus musculus (Mouse) OX=10090 GN=Eif4a2 PE=1 SV=2;>sp|P60843|IF4A1_MOUSE Eukaryotic initiation factor 4A-I OS=Mus musculus (Mouse) OX=10090 GN=Eif4a1 PE=1 SV=1;>sp|Q91VC3|IF4A3_MOUSE Eukaryotic initiation factor 4A-III OS=Mus musculus (Mouse) OX=10090 GN=Eif4a3 PE=1 SV=3	EIF4A2;EIF4A1;EIF4A3	13.5145	13.3335	13.5231	13.7358	13.5805	13.9488	13.3527	13.1914	13.233	13.1673	13.1889	13.3851
Q91VC3	>sp|Q91VC3|IF4A3_MOUSE Eukaryotic initiation factor 4A-III OS=Mus musculus (Mouse) OX=10090 GN=Eif4a3 PE=1 SV=3	EIF4A3	11.9295	11.9575	12.0514	12.2625	12.0446	12.1304	11.9216	11.9416	11.7976	12.1091	11.9677	11.9165
Q8BGD9	>sp|Q8BGD9|IF4B_MOUSE Eukaryotic translation initiation factor 4B OS=Mus musculus (Mouse) OX=10090 GN=Eif4b PE=1 SV=1	EIF4B	10.8276	10.3872	11.1022	11.3774	10.9203	11.1464	11.1016	11.1757	10.5654	10.7609	11.1073	10.9484
P63073	>sp|P63073|IF4E_MOUSE Eukaryotic translation initiation factor 4E OS=Mus musculus (Mouse) OX=10090 GN=Eif4e PE=1 SV=1	EIF4E	11.1847	10.9042	11.587	11.8665	11.2342	11.5456	10.8984	10.7706	10.6868	11.0982	11.4707	10.9116
Q6NZJ6	>sp|Q6NZJ6|IF4G1_MOUSE Eukaryotic translation initiation factor 4 gamma 1 OS=Mus musculus (Mouse) OX=10090 GN=Eif4g1 PE=1 SV=1	EIF4G1	11.6514	11.348	11.464	11.0135	11.3221	11.4155	11.2997	11.2916	11.1155	11.0212	10.9527	11.1423
Q62448	>sp|Q62448|IF4G2_MOUSE Eukaryotic translation initiation factor 4 gamma 2 OS=Mus musculus (Mouse) OX=10090 GN=Eif4g2 PE=1 SV=2	EIF4G2	11.1554	11.2527	11.1661	11.4112	11.0344	11.2808	11.1037	11.1967	10.8659	10.984	11.0969	11.0222
Q80XI3	>sp|Q80XI3|IF4G3_MOUSE Eukaryotic translation initiation factor 4 gamma 3 OS=Mus musculus (Mouse) OX=10090 GN=Eif4g3 PE=1 SV=2	EIF4G3	10.7784	10.5596	10.8819	10.8302	10.6525	11.0493	10.9108	11.0146	10.4196	10.79	10.8552	10.6861
Q9WUK2	>sp|Q9WUK2|IF4H_MOUSE Eukaryotic translation initiation factor 4H OS=Mus musculus (Mouse) OX=10090 GN=Eif4h PE=1 SV=3	EIF4H	11.8139	11.0162	10.9457	10.9306	11.4107	11.2196	11.3658	10.9858	11.0288	10.6886	11.0732	10.9401
P59325	>sp|P59325|IF5_MOUSE Eukaryotic translation initiation factor 5 OS=Mus musculus (Mouse) OX=10090 GN=Eif5 PE=1 SV=1	EIF5	12.1748	11.864	11.9277	12.1306	11.6676	11.8744	11.4226	11.4692	11.5864	12.0336	11.4791	11.4677
P63242	>sp|P63242|IF5A1_MOUSE Eukaryotic translation initiation factor 5A-1 OS=Mus musculus (Mouse) OX=10090 GN=Eif5a PE=1 SV=2	EIF5A	12.5323	11.9429	12.2282	12.4389	12.4517	12.669	11.9338	11.7962	12.0628	11.8225	12.3089	12.2201
Q05D44	>sp|Q05D44|IF2P_MOUSE Eukaryotic translation initiation factor 5B OS=Mus musculus (Mouse) OX=10090 GN=Eif5b PE=1 SV=2	EIF5B	11.3694	10.8542	10.6221	11.1481	11.394	11.2442	11.3044	11.2536	11.0665	11.462	11.2278	10.6218
O55135	>sp|O55135|IF6_MOUSE Eukaryotic translation initiation factor 6 OS=Mus musculus (Mouse) OX=10090 GN=Eif6 PE=1 SV=2	EIF6	12.9072	12.5793	12.6388	12.3139	12.8915	13.1668	12.3919	12.3888	11.8345	12.5046	12.3772	12.4582
Q8K0G5	>sp|Q8K0G5|EIPR1_MOUSE EARP and GARP complex-interacting protein 1 OS=Mus musculus (Mouse) OX=10090 GN=Eipr1 PE=1 SV=2	EIPR1	10.5117	10.585	11.2178	11.1169	11.0833	12.0979	10.7373	10.8992	10.7195	11.9028	11.1089	10.456
Q80Y81	>sp|Q80Y81|RNZ2_MOUSE Zinc phosphodiesterase ELAC protein 2 OS=Mus musculus (Mouse) OX=10090 GN=Elac2 PE=1 SV=1	ELAC2	10.9578	11.3614	11.2158	11.2632	11.4809	11.0985	11.1692	11.1406	11.339	11.192	11.2429	11.2979
P70372	>sp|P70372|ELAV1_MOUSE ELAV-like protein 1 OS=Mus musculus (Mouse) OX=10090 GN=Elavl1 PE=1 SV=2	ELAVL1	12.6901	12.4901	12.6982	12.8193	12.4591	12.8736	12.7678	12.7655	12.6806	12.7047	12.6365	12.5965
Q60775	>sp|Q60775|ELF1_MOUSE ETS-related transcription factor Elf-1 OS=Mus musculus (Mouse) OX=10090 GN=Elf1 PE=1 SV=1	ELF1							10.5052	10.8809		11.9814	10.9892	10.4888
Q8BPU7	>sp|Q8BPU7|ELMO1_MOUSE Engulfment and cell motility protein 1 OS=Mus musculus (Mouse) OX=10090 GN=Elmo1 PE=1 SV=2	ELMO1	10.9247	10.9674	10.9407	11.1226	11.1057	11.2749	11.3669	11.1981	10.9972	11.2518	10.9583	11.0245
Q8BHL5	>sp|Q8BHL5|ELMO2_MOUSE Engulfment and cell motility protein 2 OS=Mus musculus (Mouse) OX=10090 GN=Elmo2 PE=1 SV=1	ELMO2	10.3191	10.3547	10.8859	10.4935	10.2238	10.4146	10.5043	10.6859	10.3188	10.4734	10.1747	10.6176
Q8BHL5;Q8BPU7	>sp|Q8BHL5|ELMO2_MOUSE Engulfment and cell motility protein 2 OS=Mus musculus (Mouse) OX=10090 GN=Elmo2 PE=1 SV=1;>sp|Q8BPU7|ELMO1_MOUSE Engulfment and cell motility protein 1 OS=Mus musculus (Mouse) OX=10090 GN=Elmo1 PE=1 SV=2	ELMO2;ELMO1	12.5471	12.3962	11.592	11.1806	11.6348	11.9305	12.3212	12.0416	11.5503	12.064	12.1859	11.8109
P62869	>sp|P62869|ELOB_MOUSE Elongin-B OS=Mus musculus (Mouse) OX=10090 GN=Elob PE=1 SV=1	ELOB	11.7205	11.5034	12.0157	11.542	11.6443	11.9032	11.7703	11.9704	11.7267	12.3972	12.1468	12.0508
P83940	>sp|P83940|ELOC_MOUSE Elongin-C OS=Mus musculus (Mouse) OX=10090 GN=Eloc PE=1 SV=1	ELOC	10.7098	10.4316	11.3312	11.2191	10.4279	10.5773	10.8903	11.2238	10.7438	11.2788	11.3904	11.1012
Q9JLJ5	>sp|Q9JLJ5|ELOV1_MOUSE Elongation of very long chain fatty acids protein 1 OS=Mus musculus (Mouse) OX=10090 GN=Elovl1 PE=1 SV=1	ELOVL1	12.4378	12.9289	11.5168	10.9908	12.3474	11.4207	11.7415	12.2316	12.2434		11.9207	11.8161
Q8BHI7	>sp|Q8BHI7|ELOV5_MOUSE Elongation of very long chain fatty acids protein 5 OS=Mus musculus (Mouse) OX=10090 GN=Elovl5 PE=1 SV=1	ELOVL5	11.5998	11.4889	10.5164	10.1405	11.504	11.4916	10.9308	10.6195	10.5175		10.7626	9.96463
Q7TT37	>sp|Q7TT37|ELP1_MOUSE Elongator complex protein 1 OS=Mus musculus (Mouse) OX=10090 GN=Elp1 PE=1 SV=2	ELP1	11.1358	11.1535	11.1498	11.0035	10.8841	10.9868	11.2591	11.334	11.0492	10.9665	10.8879	11.1114
Q91WG4	>sp|Q91WG4|ELP2_MOUSE Elongator complex protein 2 OS=Mus musculus (Mouse) OX=10090 GN=Elp2 PE=1 SV=1	ELP2	11.5195	11.1001	10.5636	10.9601	10.8892	11.3983	11.1743	11.2788	11.1018	11.6701	10.9896	11.3527
Q9CZX0	>sp|Q9CZX0|ELP3_MOUSE Elongator complex protein 3 OS=Mus musculus (Mouse) OX=10090 GN=Elp3 PE=1 SV=1	ELP3	11.4715	10.7058	11.7024	10.5373	11.704	11.6138	11.3112	11.1288	11.1992	10.7506	11.511	11.2668
Q9ER73	>sp|Q9ER73|ELP4_MOUSE Elongator complex protein 4 OS=Mus musculus (Mouse) OX=10090 GN=Elp4 PE=1 SV=2	ELP4	9.61259	10.7778	10.3131		10.1918	10.0644
Q99L85	>sp|Q99L85|ELP5_MOUSE Elongator complex protein 5 OS=Mus musculus (Mouse) OX=10090 GN=Elp5 PE=2 SV=1	ELP5							10.2063	10.5305	10.4722		10.1539	9.93973
Q8C7X2	>sp|Q8C7X2|EMC1_MOUSE ER membrane protein complex subunit 1 OS=Mus musculus (Mouse) OX=10090 GN=Emc1 PE=1 SV=1	EMC1	12.1312	12.2258	11.9645	12.2674	12.319	11.932	12.0106	11.9022	12.2798	12.0352	11.9674	12.0427
Q3TAS6	>sp|Q3TAS6|EMC10_MOUSE ER membrane protein complex subunit 10 OS=Mus musculus (Mouse) OX=10090 GN=Emc10 PE=2 SV=2	EMC10	10.258	10.3731		9.89089	11.2793	9.66777	9.81524	10.6551	10.9514	9.90235	11.0224	10.5225
Q9CRD2	>sp|Q9CRD2|EMC2_MOUSE ER membrane protein complex subunit 2 OS=Mus musculus (Mouse) OX=10090 GN=Emc2 PE=1 SV=1	EMC2	12.268	12.4097	12.2928	12.6462	12.4815	12.1921	12.1505	11.9616	12.256	11.9821	12.1049	12.2134
Q99KI3	>sp|Q99KI3|EMC3_MOUSE ER membrane protein complex subunit 3 OS=Mus musculus (Mouse) OX=10090 GN=Emc3 PE=1 SV=3	EMC3	11.9551	12.5275	12.1213	11.7996	12.0755	11.5125	11.916	11.4503	12.2355	11.7494	11.8126	11.7627
Q9CZX9	>sp|Q9CZX9|EMC4_MOUSE ER membrane protein complex subunit 4 OS=Mus musculus (Mouse) OX=10090 GN=Emc4 PE=1 SV=1	EMC4	12.3122	12.1696	11.9469	11.8233	12.0376	11.7882	12.0419	12.1362	12.6854	12.4569	11.942	12.5521
Q9EP72	>sp|Q9EP72|EMC7_MOUSE ER membrane protein complex subunit 7 OS=Mus musculus (Mouse) OX=10090 GN=Emc7 PE=1 SV=1	EMC7	11.3301	11.5303	11.7707	11.6132	11.8087	11.0926	11.3478	10.9037	11.5982	11.5815	11.3399	11.3741
O70378	>sp|O70378|EMC8_MOUSE ER membrane protein complex subunit 8 OS=Mus musculus (Mouse) OX=10090 GN=Emc8 PE=1 SV=1	EMC8	11.279	11.3646	11.6003	11.2728	11.5463	11.1275	10.9512	10.9766	11.3351	11.4243	11.4788	11.1966
Q9DB76	>sp|Q9DB76|EMC9_MOUSE ER membrane protein complex subunit 9 OS=Mus musculus (Mouse) OX=10090 GN=Emc9 PE=1 SV=1	EMC9	10.9686	10.9443		11.5528	11.6217	11.7434
O08579	>sp|O08579|EMD_MOUSE Emerin OS=Mus musculus (Mouse) OX=10090 GN=Emd PE=1 SV=1	EMD	11.0879	10.9042	10.7708	11.0219	10.6259	10.3602	11.0038	10.9713	10.7256	10.9791	10.7596	10.5258
O35130	>sp|O35130|NEP1_MOUSE Ribosomal RNA small subunit methyltransferase NEP1 OS=Mus musculus (Mouse) OX=10090 GN=Emg1 PE=1 SV=1	EMG1	11.1003	11.0097	10.9776	10.0064	11.081	9.88444	10.3428	10.5767	10.275		10.2722	10.5087
Q7TNG5	>sp|Q7TNG5|EMAL2_MOUSE Echinoderm microtubule-associated protein-like 2 OS=Mus musculus (Mouse) OX=10090 GN=Eml2 PE=1 SV=1	EML2	12.2405	12.3098	12.0096	11.9937	12.1953	12.2829	12.3554	12.3373	11.9928	12.146	11.893	12.0199
Q8VC03	>sp|Q8VC03|EMAL3_MOUSE Echinoderm microtubule-associated protein-like 3 OS=Mus musculus (Mouse) OX=10090 GN=Eml3 PE=1 SV=1	EML3							9.41243	8.56806	9.04029	9.49916	10.1601	9.08437
Q3UMY5	>sp|Q3UMY5|EMAL4_MOUSE Echinoderm microtubule-associated protein-like 4 OS=Mus musculus (Mouse) OX=10090 GN=Eml4 PE=1 SV=1	EML4							10.2408	9.38616	9.19606	9.62971	9.54858	9.65174
Q5SQM0	>sp|Q5SQM0|EMAL6_MOUSE Echinoderm microtubule-associated protein-like 6 OS=Mus musculus (Mouse) OX=10090 GN=Eml6 PE=2 SV=1	EML6	12.6575	12.93	13.1605	13.7372	13.2502	13.7484		12.6232	12.3833	12.6792	12.6775	12.7023
O35912	>sp|O35912|EMP3_MOUSE Epithelial membrane protein 3 OS=Mus musculus (Mouse) OX=10090 GN=Emp3 PE=2 SV=2	EMP3	10.309	10.4539	11.4404	11.0082	10.6384
Q03173	>sp|Q03173|ENAH_MOUSE Protein enabled homolog OS=Mus musculus (Mouse) OX=10090 GN=Enah PE=1 SV=2	ENAH							10.3908	10.0287	9.44575		10.0841	9.90182
Q8C522	>sp|Q8C522|ENDD1_MOUSE Endonuclease domain-containing 1 protein OS=Mus musculus (Mouse) OX=10090 GN=Endod1 PE=1 SV=2	ENDOD1	11.5369	12.0682	10.6865	11.5039	11.4153	10.6705	11.3024	11.4491	11.4735	10.8148	11.4221	10.8675
O08600	>sp|O08600|NUCG_MOUSE Endonuclease G, mitochondrial OS=Mus musculus (Mouse) OX=10090 GN=Endog PE=1 SV=1	ENDOG	11.6324	11.9939	11.6162	11.1645	11.9994	11.4795	11.7623	11.4554	12.0342	11.9021	11.7155	11.9135
P17182	>sp|P17182|ENOA_MOUSE Alpha-enolase OS=Mus musculus (Mouse) OX=10090 GN=Eno1 PE=1 SV=3	ENO1	13.9941	13.744	13.8761	13.8357	13.6634	14.1533	14.0858	14.2698	13.6069	13.8543	13.6806	13.706
P17182;P21550	>sp|P17182|ENOA_MOUSE Alpha-enolase OS=Mus musculus (Mouse) OX=10090 GN=Eno1 PE=1 SV=3;>sp|P21550|ENOB_MOUSE Beta-enolase OS=Mus musculus (Mouse) OX=10090 GN=Eno3 PE=1 SV=3	ENO1;ENO3	14.3051	14.3149	14.8257	13.9943	13.894	14.5483	14.5989	14.6137	14.5582	14.3912	14.4466	14.1959
P21550	>sp|P21550|ENOB_MOUSE Beta-enolase OS=Mus musculus (Mouse) OX=10090 GN=Eno3 PE=1 SV=3	ENO3	11.8478	11.7957	12.7527	11.8665	11.5626	11.5495	11.6442	11.7212	11.6517	11.3441	11.402	11.4968
Q8BGB7	>sp|Q8BGB7|ENOPH_MOUSE Enolase-phosphatase E1 OS=Mus musculus (Mouse) OX=10090 GN=Enoph1 PE=1 SV=1	ENOPH1	11.4782	11.7383	11.7545	11.1213	11.2654	11.7698	11.4784	11.9791	11.5655	10.9911	10.8709	11.7439
Q8BTJ4	>sp|Q8BTJ4|ENPP4_MOUSE Bis(5'-adenosyl)-triphosphatase enpp4 OS=Mus musculus (Mouse) OX=10090 GN=Enpp4 PE=1 SV=1	ENPP4	10.3502	10.8596	10.9321		10.1247	10.1434	10.3681		9.92671	10.4359	10.4346	10.0138
Q9EQG7	>sp|Q9EQG7|ENPP5_MOUSE Ectonucleotide pyrophosphatase/phosphodiesterase family member 5 OS=Mus musculus (Mouse) OX=10090 GN=Enpp5 PE=1 SV=3	ENPP5	10.7783	10.9006	10.8944	11.2245	11.3062	10.6978	11.0021	11.2443	11.5249	10.7406	11.5394	10.9576
O55026	>sp|O55026|ENTP2_MOUSE Ectonucleoside triphosphate diphosphohydrolase 2 OS=Mus musculus (Mouse) OX=10090 GN=Entpd2 PE=1 SV=2	ENTPD2	12.4229	12.193	11.75	12.3873	12.4374	12.4966	11.4609	11.8594	10.5992	11.3723	11.24	12.0179
Q9DBT4	>sp|Q9DBT4|ENTP4_MOUSE Ectonucleoside triphosphate diphosphohydrolase 4 OS=Mus musculus (Mouse) OX=10090 GN=Entpd4 PE=1 SV=1	ENTPD4	11.2388	11.3989	11.3832	11.9223	11.1938	11.678	9.33846	9.12097	10.366		9.7772	10.2108
Q9WUZ9	>sp|Q9WUZ9|ENTP5_MOUSE Ectonucleoside triphosphate diphosphohydrolase 5 OS=Mus musculus (Mouse) OX=10090 GN=Entpd5 PE=1 SV=1	ENTPD5	10.785	11.324	10.9565	10.9331	11.4744	10.5772	11.0177	10.384	11.4769	10.9075	11.1221	10.9309
Q8BYW9	>sp|Q8BYW9|EOGT_MOUSE EGF domain-specific O-linked N-acetylglucosamine transferase OS=Mus musculus (Mouse) OX=10090 GN=Eogt PE=1 SV=1	EOGT	11.5182	11.4403	11.7943	11.9859	11.7279	11.9247	11.4025	11.3808	11.4906	11.6972	11.4202	11.1832
P48193	>sp|P48193|41_MOUSE Protein 4.1 OS=Mus musculus (Mouse) OX=10090 GN=Epb41 PE=1 SV=2	EPB41	10.5131	10.9006	10.2358	10.0275	10.1696	10.0399	9.61236	9.08671	9.4765	9.99915	10.0693	9.53707
Q9Z2H5	>sp|Q9Z2H5|E41L1_MOUSE Band 4.1-like protein 1 OS=Mus musculus (Mouse) OX=10090 GN=Epb41l1 PE=1 SV=2	EPB41L1	10.8545	10.9251	11.1108	10.5779	10.8223	10.9225	10.1113	9.65766	9.83582	10.3758	10.3443	9.58653
O70318	>sp|O70318|E41L2_MOUSE Band 4.1-like protein 2 OS=Mus musculus (Mouse) OX=10090 GN=Epb41l2 PE=1 SV=2	EPB41L2	11.3842	11.4231	11.1647	11.1073	11.07	11.3313	10.6002	11.1124	10.4793	10.6527	10.7918	10.8103
O70318;Q9WV92;Q9Z2H5	>sp|O70318|E41L2_MOUSE Band 4.1-like protein 2 OS=Mus musculus (Mouse) OX=10090 GN=Epb41l2 PE=1 SV=2;>sp|Q9WV92|E41L3_MOUSE Band 4.1-like protein 3 OS=Mus musculus (Mouse) OX=10090 GN=Epb41l3 PE=1 SV=1;>sp|Q9Z2H5|E41L1_MOUSE Band 4.1-like protein 1 OS=Mus musculus (Mouse) OX=10090 GN=Epb41l1 PE=1 SV=2	EPB41L2;EPB41L3;EPB41L1	9.49717	9.57074	9.88179	9.72746	10.0747	10.0388	9.23575	9.46363	9.43459		10.2218	9.26314
Q99M71	>sp|Q99M71|EPDR1_MOUSE Mammalian ependymin-related protein 1 OS=Mus musculus (Mouse) OX=10090 GN=Epdr1 PE=1 SV=1	EPDR1	11.4121	11.2656	12.0378	11.6865	11.9189	11.4496	11.461	11.4187	11.0921	11.6695	11.2342	11.4123
Q03145	>sp|Q03145|EPHA2_MOUSE Ephrin type-A receptor 2 OS=Mus musculus (Mouse) OX=10090 GN=Epha2 PE=1 SV=3	EPHA2	10.3326	9.45462		12.5582	11.4028	11.865	10.7658	10.3649	10.3346	11.0282	10.6082	11.1252
P54763	>sp|P54763|EPHB2_MOUSE Ephrin type-B receptor 2 OS=Mus musculus (Mouse) OX=10090 GN=Ephb2 PE=1 SV=3	EPHB2	10.403	10.7008	11.246	10.739	10.6889	10.6539	10.2792	9.96125	10.1179	10.9242	10.5676	10.4568
Q9D379	>sp|Q9D379|HYEP_MOUSE Epoxide hydrolase 1 OS=Mus musculus (Mouse) OX=10090 GN=Ephx1 PE=1 SV=2	EPHX1	14.2884	14.3848	14.5304	14.4334	14.4533	14.5513	14.4671	14.2817	14.3935	14.5457	14.3794	14.4388
P34914	>sp|P34914|HYES_MOUSE Bifunctional epoxide hydrolase 2 OS=Mus musculus (Mouse) OX=10090 GN=Ephx2 PE=1 SV=2	EPHX2	10.5163	10.3544	9.96324	9.52601	9.54051	9.25205	10.4366	10.6467	10.0837		10.1126	9.44278
Q8VEH5	>sp|Q8VEH5|EPMIP_MOUSE EPM2A-interacting protein 1 OS=Mus musculus (Mouse) OX=10090 GN=Epm2aip1 PE=1 SV=1	EPM2AIP1	12.0389	11.9884	11.9655	12.8348	11.887	12.3076	12.1709	12.2085	12.101	12.0122	12.29	12.0597
Q80VP1	>sp|Q80VP1|EPN1_MOUSE Epsin-1 OS=Mus musculus (Mouse) OX=10090 GN=Epn1 PE=1 SV=3	EPN1	10.0121	10.2891	11.1347	9.75846	9.94613	10.1125	11.0054	10.8806	10.4603	10.6067	10.5504	9.71623
Q80VP1;Q91W69	>sp|Q80VP1|EPN1_MOUSE Epsin-1 OS=Mus musculus (Mouse) OX=10090 GN=Epn1 PE=1 SV=3;>sp|Q91W69|EPN3_MOUSE Epsin-3 OS=Mus musculus (Mouse) OX=10090 GN=Epn3 PE=1 SV=1	EPN1;EPN3	9.61749	9.76237	10.3425		10.2708	10.5206	9.61269	8.54391	9.52444	9.41868		9.52364
Q8CHU3	>sp|Q8CHU3|EPN2_MOUSE Epsin-2 OS=Mus musculus (Mouse) OX=10090 GN=Epn2 PE=1 SV=1	EPN2	10.4304	10.9498	11.4092	10.4595	10.6646		10.6219	10.9083	9.74738	10.7177		9.92394
Q8R0W0	>sp|Q8R0W0|EPIPL_MOUSE Epiplakin OS=Mus musculus (Mouse) OX=10090 GN=Eppk1 PE=1 SV=2	EPPK1							10.6315	10.67	10.7799		11.361	9.54397
Q8R0W0;Q9QXS1	>sp|Q8R0W0|EPIPL_MOUSE Epiplakin OS=Mus musculus (Mouse) OX=10090 GN=Eppk1 PE=1 SV=2;>sp|Q9QXS1|PLEC_MOUSE Plectin OS=Mus musculus (Mouse) OX=10090 GN=Plec PE=1 SV=3	EPPK1;PLEC	13.0947	13.337	10.264	10.7953	12.26	12.2155	12.4263	12.9262	12.1881	11.3135	10.2668	11.9517
Q8CGC7	>sp|Q8CGC7|SYEP_MOUSE Bifunctional glutamate/proline--tRNA ligase OS=Mus musculus (Mouse) OX=10090 GN=Eprs PE=1 SV=4	EPRS	12.3022	12.2222	12.0055	12.1696	12.1104	12.2802	12.0612	12.085	11.8043	11.8762	11.7436	11.8938
P42567	>sp|P42567|EPS15_MOUSE Epidermal growth factor receptor substrate 15 OS=Mus musculus (Mouse) OX=10090 GN=Eps15 PE=1 SV=1	EPS15	10.5798	10.5779	10.4477	11.1715	10.6309	10.6705	10.301	10.843	10.2535	10.4768	10.8734	10.1277
Q60902	>sp|Q60902|EP15R_MOUSE Epidermal growth factor receptor substrate 15-like 1 OS=Mus musculus (Mouse) OX=10090 GN=Eps15l1 PE=1 SV=3	EPS15L1	10.8792	10.8504	10.555	10.6897	10.5814	10.5471	10.6641	11.0078	10.6513	10.634	10.5456	10.905
Q08509	>sp|Q08509|EPS8_MOUSE Epidermal growth factor receptor kinase substrate 8 OS=Mus musculus (Mouse) OX=10090 GN=Eps8 PE=1 SV=2	EPS8							9.58627	9.76379	9.48495	9.81455		9.63255
Q9CZU4	>sp|Q9CZU4|ERAL1_MOUSE GTPase Era, mitochondrial OS=Mus musculus (Mouse) OX=10090 GN=Eral1 PE=2 SV=1	ERAL1	10.1755	10.3758	10.9677	11.0981	10.8596	10.5616	10.7474	10.5274	10.8502	10.8067	10.7769	10.7116
Q9EQH2	>sp|Q9EQH2|ERAP1_MOUSE Endoplasmic reticulum aminopeptidase 1 OS=Mus musculus (Mouse) OX=10090 GN=Erap1 PE=1 SV=2	ERAP1	11.8629	12.1345	12.2209	12.1111	12.3061	12.2298	11.4223	11.2862	11.3728	11.3108	11.4693	11.2604
Q80TH2	>sp|Q80TH2|ERBIN_MOUSE Erbin OS=Mus musculus (Mouse) OX=10090 GN=Erbin PE=1 SV=3	ERBIN	11.9278	12.1122	12.2791	11.0301	11.7689	11.2565	11.9524	10.9663	11.6673		11.3147	11.8883
Q9DC16	>sp|Q9DC16|ERGI1_MOUSE Endoplasmic reticulum-Golgi intermediate compartment protein 1 OS=Mus musculus (Mouse) OX=10090 GN=Ergic1 PE=1 SV=1	ERGIC1	13.01	12.9879	13.0235	12.8413	13.0822	13.3225	12.8984	12.7302	12.6382	12.6811	12.6817	12.8347
Q9CR89	>sp|Q9CR89|ERGI2_MOUSE Endoplasmic reticulum-Golgi intermediate compartment protein 2 OS=Mus musculus (Mouse) OX=10090 GN=Ergic2 PE=1 SV=1	ERGIC2	11.1159	10.762	11.0859	11.3053	10.8981	10.7424	9.95732	9.50581	10.5161	10.7202	9.7534	9.72576
Q9CQE7	>sp|Q9CQE7|ERGI3_MOUSE Endoplasmic reticulum-Golgi intermediate compartment protein 3 OS=Mus musculus (Mouse) OX=10090 GN=Ergic3 PE=1 SV=1	ERGIC3	11.6455	11.4621	11.5739	11.2507	11.2351	10.9234	11.2157	11.1153	11.1844	10.8666	11.3416	11.1438
P84089	>sp|P84089|ERH_MOUSE Enhancer of rudimentary homolog OS=Mus musculus (Mouse) OX=10090 GN=Erh PE=1 SV=1	ERH	13.0318	12.4946	12.3536	12.4014	12.4235	11.9587	12.5053	12.9168	12.998	13.1145	12.6208	13.0961
Q8VEH8	>sp|Q8VEH8|ERLEC_MOUSE Endoplasmic reticulum lectin 1 OS=Mus musculus (Mouse) OX=10090 GN=Erlec1 PE=1 SV=1	ERLEC1	10.9718	11.3535	11.0484	11.2997	11.0426	11.3213	11.1832	11.1556	11.1473	10.9401	10.9227	11.1979
Q91X78	>sp|Q91X78|ERLN1_MOUSE Erlin-1 OS=Mus musculus (Mouse) OX=10090 GN=Erlin1 PE=1 SV=2	ERLIN1	11.663	11.7806	11.7606	11.8271	12.0784	11.7102	11.6006	11.4798	11.8831	11.6944	12.0698	12.0493
Q8BFZ9	>sp|Q8BFZ9|ERLN2_MOUSE Erlin-2 OS=Mus musculus (Mouse) OX=10090 GN=Erlin2 PE=1 SV=1	ERLIN2	12.8228	13.0152	13.0817	13.2024	13.1558	12.9206	12.8595	12.5549	12.8773	12.8424	12.9249	12.9004
Q8BFZ9;Q91X78	>sp|Q8BFZ9|ERLN2_MOUSE Erlin-2 OS=Mus musculus (Mouse) OX=10090 GN=Erlin2 PE=1 SV=1;>sp|Q91X78|ERLN1_MOUSE Erlin-1 OS=Mus musculus (Mouse) OX=10090 GN=Erlin1 PE=1 SV=2	ERLIN2;ERLIN1	13.3184	13.6864	13.8162	14.0465	13.7424	13.6569	13.2688	13.1547	13.5777	13.8182	13.8032	13.4455
Q3UVK0	>sp|Q3UVK0|ERMP1_MOUSE Endoplasmic reticulum metallopeptidase 1 OS=Mus musculus (Mouse) OX=10090 GN=Ermp1 PE=1 SV=2	ERMP1	12.5535	12.6851	12.659	12.4564	12.7705	12.6524	12.3122	12.5098	12.4708	12.295	12.242	12.448
Q9EQY0	>sp|Q9EQY0|ERN1_MOUSE Serine/threonine-protein kinase/endoribonuclease IRE1 OS=Mus musculus (Mouse) OX=10090 GN=Ern1 PE=1 SV=1	ERN1	10.6185	10.2638		11.1885	10.8578	10.3191	10.7233	10.6226	10.5821	10.6422	11.0703	10.8837
Q8R180	>sp|Q8R180|ERO1A_MOUSE ERO1-like protein alpha OS=Mus musculus (Mouse) OX=10090 GN=Ero1a PE=1 SV=2	ERO1A	11.908	11.9998	12.0347	12.0494	12.1048	11.9045	11.6516	11.4657	11.556	11.1454	11.6126	11.439
Q8R180;Q8R2E9	>sp|Q8R180|ERO1A_MOUSE ERO1-like protein alpha OS=Mus musculus (Mouse) OX=10090 GN=Ero1a PE=1 SV=2;>sp|Q8R2E9|ERO1B_MOUSE ERO1-like protein beta OS=Mus musculus (Mouse) OX=10090 GN=Ero1b PE=1 SV=1	ERO1A;ERO1B	13.1163	13.2025	13.7312	13.6241	13.3579	13.6878	13.2576	13.0462	12.8894	13.2777	13.2053	13.1413
Q8R2E9	>sp|Q8R2E9|ERO1B_MOUSE ERO1-like protein beta OS=Mus musculus (Mouse) OX=10090 GN=Ero1b PE=1 SV=1	ERO1B	11.1238	11.1772	11.1033	11.0085	10.8823	10.4041	10.5135	10.3444	9.83908	10.9042	10.888	10.1596
P57759	>sp|P57759|ERP29_MOUSE Endoplasmic reticulum resident protein 29 OS=Mus musculus (Mouse) OX=10090 GN=Erp29 PE=1 SV=2	ERP29	13.6819	13.9085	13.1483	13.3988	13.4654	13.1879	13.1968	13.3108	13.5214	13.1768	13.1126	13.1989
Q9D1Q6	>sp|Q9D1Q6|ERP44_MOUSE Endoplasmic reticulum resident protein 44 OS=Mus musculus (Mouse) OX=10090 GN=Erp44 PE=1 SV=1	ERP44	12.9972	13.0429	13.1063	13.1065	13.1925	12.9329	12.7572	12.6463	12.7421	12.703	12.9153	12.7344
Q9R0P3	>sp|Q9R0P3|ESTD_MOUSE S-formylglutathione hydrolase OS=Mus musculus (Mouse) OX=10090 GN=Esd PE=1 SV=1	ESD	13.3091	13.1029	13.6395	13.2903	13.3406	13.4644	12.7222	12.934	12.871	13.0164	13.089	12.9739
Q3U7R1	>sp|Q3U7R1|ESYT1_MOUSE Extended synaptotagmin-1 OS=Mus musculus (Mouse) OX=10090 GN=Esyt1 PE=1 SV=2	ESYT1	11.1262	11.5321	11.4757	11.441	11.4252	11.3431	11.1421	11.1526	11.2389	11.3318	11.3632	11.2061
Q3TZZ7	>sp|Q3TZZ7|ESYT2_MOUSE Extended synaptotagmin-2 OS=Mus musculus (Mouse) OX=10090 GN=Esyt2 PE=1 SV=1	ESYT2	11.6723	11.5785	11.4128	11.4472	11.3954	11.612	11.358	11.5092	11.4985	11.5481	11.4617	11.3588
Q8BWY3	>sp|Q8BWY3|ERF1_MOUSE Eukaryotic peptide chain release factor subunit 1 OS=Mus musculus (Mouse) OX=10090 GN=Etf1 PE=1 SV=4	ETF1	12.2087	11.8483	12.141	12.168	11.9658	12.2954	11.717	12.0376	11.5863	11.7637	11.7352	11.6732
Q99LC5	>sp|Q99LC5|ETFA_MOUSE Electron transfer flavoprotein subunit alpha, mitochondrial OS=Mus musculus (Mouse) OX=10090 GN=Etfa PE=1 SV=2	ETFA	14.7889	14.9321	15.3428	15.1773	15.1664	14.6855	15.0447	14.9381	15.1637	15.1561	15.2954	15.184
Q9DCW4	>sp|Q9DCW4|ETFB_MOUSE Electron transfer flavoprotein subunit beta OS=Mus musculus (Mouse) OX=10090 GN=Etfb PE=1 SV=3	ETFB	15.1077	15.3106	15.7246	15.6693	15.5981	15.148	15.3271	15.3239	15.6104	15.5895	15.6404	15.5527
Q921G7	>sp|Q921G7|ETFD_MOUSE Electron transfer flavoprotein-ubiquinone oxidoreductase, mitochondrial OS=Mus musculus (Mouse) OX=10090 GN=Etfdh PE=1 SV=1	ETFDH	13.6806	13.8854	14.3312	14.3972	14.1881	13.9067	14.0496	13.7396	14.3589	14.4671	14.3835	14.3278
Q9DCM0	>sp|Q9DCM0|ETHE1_MOUSE Persulfide dioxygenase ETHE1, mitochondrial OS=Mus musculus (Mouse) OX=10090 GN=Ethe1 PE=1 SV=2	ETHE1	11.9655	11.8294	11.9728	10.5978	12.6029	11.9122	11.5838	11.696	12.3382	12.4462	12.2113	12.258
Q9D4V0	>sp|Q9D4V0|EKI1_MOUSE Ethanolamine kinase 1 OS=Mus musculus (Mouse) OX=10090 GN=Etnk1 PE=1 SV=2	ETNK1	9.10697	9.6917	10.3868	9.41771	10.1289
Q9D952	>sp|Q9D952|EVPL_MOUSE Envoplakin OS=Mus musculus (Mouse) OX=10090 GN=Evpl PE=1 SV=3	EVPL	10.6451	10.6319	11.5747	11.8334	10.753	10.7348	11.0365	9.55952	10.6453	11.9396	11.1171	10.2714
Q61545	>sp|Q61545|EWS_MOUSE RNA-binding protein EWS OS=Mus musculus (Mouse) OX=10090 GN=Ewsr1 PE=1 SV=2	EWSR1	11.6687	11.3837	11.181	12.0162	11.682	11.5953	12.2148	11.8293	11.5232	11.2457	11.5437	11.8452
Q9D4H1	>sp|Q9D4H1|EXOC2_MOUSE Exocyst complex component 2 OS=Mus musculus (Mouse) OX=10090 GN=Exoc2 PE=1 SV=1	EXOC2	11.2528	11.0801	10.4291	10.1589	10.9532	11.4942	10.898	10.8051	11.126	10.5353	11.3428	10.8273
Q6KAR6	>sp|Q6KAR6|EXOC3_MOUSE Exocyst complex component 3 OS=Mus musculus (Mouse) OX=10090 GN=Exoc3 PE=1 SV=2	EXOC3	9.79346	10.5919	11.0742		9.85552	10.9403
O35382	>sp|O35382|EXOC4_MOUSE Exocyst complex component 4 OS=Mus musculus (Mouse) OX=10090 GN=Exoc4 PE=1 SV=2	EXOC4	9.83702	9.87507	10.9759	10.3099	9.97324	10.0523	9.28029	9.66621	9.66474	9.8101	10.1065	9.88468
O35250	>sp|O35250|EXOC7_MOUSE Exocyst complex component 7 OS=Mus musculus (Mouse) OX=10090 GN=Exoc7 PE=1 SV=2	EXOC7	9.69403	9.70859	10.4295	10.838	10.1093	9.69134	9.93424	10.0682	9.74634	9.61981	10.0444	9.46116
Q6PGF7	>sp|Q6PGF7|EXOC8_MOUSE Exocyst complex component 8 OS=Mus musculus (Mouse) OX=10090 GN=Exoc8 PE=1 SV=1	EXOC8	12.0675	10.6316	11.5089		12.3324	12.6632	11.3546	10.9977	10.2517	10.25	12.1733	11.3457
Q8C163	>sp|Q8C163|EXOG_MOUSE Nuclease EXOG, mitochondrial OS=Mus musculus (Mouse) OX=10090 GN=Exog PE=1 SV=1	EXOG	11.2499	11.9637	11.6577	10.733	11.3262	11.6558	11.6177	11.5992	12.0398	11.5448	11.8179	11.5361
P56960	>sp|P56960|EXOSX_MOUSE Exosome component 10 OS=Mus musculus (Mouse) OX=10090 GN=Exosc10 PE=1 SV=2	EXOSC10	9.68005	9.37727	10.1325	10.167	10.1676	10.0497	9.65402	9.53241	9.93953	9.69669	10.0641	9.55965
Q8VBV3	>sp|Q8VBV3|EXOS2_MOUSE Exosome complex component RRP4 OS=Mus musculus (Mouse) OX=10090 GN=Exosc2 PE=1 SV=1	EXOSC2	10.3224	10.2319	10.6383	10.6584	9.88743	10.5283	10.1669	10.4732	9.87585	10.3088	10.1046	9.77056
Q921I9	>sp|Q921I9|EXOS4_MOUSE Exosome complex component RRP41 OS=Mus musculus (Mouse) OX=10090 GN=Exosc4 PE=1 SV=3	EXOSC4	11.0338	10.8356	10.4978	10.6016	10.9088	10.7049	10.9994	11.3219	11.13	10.4213	10.8538	10.8855
Q9CRA8	>sp|Q9CRA8|EXOS5_MOUSE Exosome complex component RRP46 OS=Mus musculus (Mouse) OX=10090 GN=Exosc5 PE=1 SV=1	EXOSC5	10.3974	10.4381	10.5031	10.6582	10.1676	10.495	10.3854	10.2647	10.1008	9.89786	10.7885	10.2788
Q8BTW3	>sp|Q8BTW3|EXOS6_MOUSE Exosome complex component MTR3 OS=Mus musculus (Mouse) OX=10090 GN=Exosc6 PE=1 SV=1	EXOSC6	9.73793	10.3742	10.4454	9.52174	9.857	10.5434	10.0595	10.4779	9.81781	10.7316	10.0766	10.1942
Q9D0M0	>sp|Q9D0M0|EXOS7_MOUSE Exosome complex exonuclease RRP42 OS=Mus musculus (Mouse) OX=10090 GN=Exosc7 PE=1 SV=2	EXOSC7	10.0883	10.0896	10.6374	10.8769	10.2077	9.9995	10.0799	9.73894	10.4182		10.5998	10.5458
Q9D753	>sp|Q9D753|EXOS8_MOUSE Exosome complex component RRP43 OS=Mus musculus (Mouse) OX=10090 GN=Exosc8 PE=1 SV=1	EXOSC8	10.5006	10.2895	10.7443	10.6866	10.876	10.2395	10.7076	10.7637	10.7944	11.2812	10.9158	10.2281
Q9JHI7	>sp|Q9JHI7|EXOS9_MOUSE Exosome complex component RRP45 OS=Mus musculus (Mouse) OX=10090 GN=Exosc9 PE=1 SV=1	EXOSC9	10.6776	10.7699	11.2303		10.985	9.74406	10.7712	10.9875	11.0585	11.2042	10.8338	10.3147
Q9JKV7	>sp|Q9JKV7|EXTL1_MOUSE Exostosin-like 1 OS=Mus musculus (Mouse) OX=10090 GN=Extl1 PE=2 SV=2	EXTL1	14.7415	14.8043	14.4255	15.324	14.7137	15.0939
Q9ES89	>sp|Q9ES89|EXTL2_MOUSE Exostosin-like 2 OS=Mus musculus (Mouse) OX=10090 GN=Extl2 PE=1 SV=1	EXTL2	10.8299	11.2462	11.2262	10.525	10.4255	11.3701	10.546	10.9944	10.6747		11.0191	10.9614
Q9WVL6	>sp|Q9WVL6|EXTL3_MOUSE Exostosin-like 3 OS=Mus musculus (Mouse) OX=10090 GN=Extl3 PE=1 SV=2	EXTL3							10.5549	10.6027	10.4747		11.5005	10.5713
P26040	>sp|P26040|EZRI_MOUSE Ezrin OS=Mus musculus (Mouse) OX=10090 GN=Ezr PE=1 SV=3	EZR	11.4943	11.9474	11.0634	11.3716	11.0753	11.0425	10.4617	10.2103	10.7797	10.3857	10.9226	10.5452
P26040;P26041;P26043	>sp|P26040|EZRI_MOUSE Ezrin OS=Mus musculus (Mouse) OX=10090 GN=Ezr PE=1 SV=3;>sp|P26041|MOES_MOUSE Moesin OS=Mus musculus (Mouse) OX=10090 GN=Msn PE=1 SV=3;>sp|P26043|RADI_MOUSE Radixin OS=Mus musculus (Mouse) OX=10090 GN=Rdx PE=1 SV=3	EZR;MSN;RDX	14.0649	13.9847	13.302	13.225	13.6981	13.915	13.2584	13.362	13.1247	12.6732	12.8496	12.9369
P26040;P26043	>sp|P26040|EZRI_MOUSE Ezrin OS=Mus musculus (Mouse) OX=10090 GN=Ezr PE=1 SV=3;>sp|P26043|RADI_MOUSE Radixin OS=Mus musculus (Mouse) OX=10090 GN=Rdx PE=1 SV=3	EZR;RDX	11.6401	12.0248	11.4271	11.8659	12.1163	12.2138	12.2709	12.031	11.5881	12.0068	11.832	10.6522
O88792	>sp|O88792|JAM1_MOUSE Junctional adhesion molecule A OS=Mus musculus (Mouse) OX=10090 GN=F11r PE=1 SV=2	F11R	12.5543	12.7384	11.0191	12.6488	12.0139	11.7486	9.37803	9.62081	10.0015		9.89537	9.71335
Q00558	>sp|Q00558|HAP40_MOUSE 40-kDa huntingtin-associated protein OS=Mus musculus (Mouse) OX=10090 GN=F8a1 PE=1 SV=1	F8A1	10.1861	9.98903	9.96044		10.154	10.1903
O08914	>sp|O08914|FAAH1_MOUSE Fatty-acid amide hydrolase 1 OS=Mus musculus (Mouse) OX=10090 GN=Faah PE=1 SV=1	FAAH	10.9098	10.3174		10.4525	11.031	10.1062
P04117	>sp|P04117|FABP4_MOUSE Fatty acid-binding protein, adipocyte OS=Mus musculus (Mouse) OX=10090 GN=Fabp4 PE=1 SV=3	FABP4	13.0444	12.2306	12.8094	11.343	11.529	11.2694	10.5843	10.3793	10.429	11.4116	11.0182	10.5778
Q920L1	>sp|Q920L1|FADS1_MOUSE Acyl-CoA (8-3)-desaturase OS=Mus musculus (Mouse) OX=10090 GN=Fads1 PE=1 SV=1	FADS1	12.7027	12.7953	12.4628	12.2831	12.8958	12.3903	12.5345	12.0858	13.152	11.5346	12.6941	12.8751
Q920L1;Q9Z0R9	>sp|Q920L1|FADS1_MOUSE Acyl-CoA (8-3)-desaturase OS=Mus musculus (Mouse) OX=10090 GN=Fads1 PE=1 SV=1;>sp|Q9Z0R9|FADS2_MOUSE Acyl-CoA 6-desaturase OS=Mus musculus (Mouse) OX=10090 GN=Fads2 PE=1 SV=1	FADS1;FADS2	11.5074	11.7373	10.894	11.705	13.3572	12.8964	11.5604	10.5212	11.3009	10.9886	12.4445	12.2099
Q9Z0R9	>sp|Q9Z0R9|FADS2_MOUSE Acyl-CoA 6-desaturase OS=Mus musculus (Mouse) OX=10090 GN=Fads2 PE=1 SV=1	FADS2	13.7449	13.5088	13.774	13.2335	13.8674	13.5724	12.7233	12.3285	13.1705	12.7867	12.8894	13.0069
Q80UG1	>sp|Q80UG1|FADS6_MOUSE Fatty acid desaturase 6 OS=Mus musculus (Mouse) OX=10090 GN=Fads6 PE=2 SV=1	FADS6	12.4266	12.631	12.041	12.4318	12.9297	12.209	12.8011	12.7987	12.8965	13.0156	13.0183	13.2126
P54731	>sp|P54731|FAF1_MOUSE FAS-associated factor 1 OS=Mus musculus (Mouse) OX=10090 GN=Faf1 PE=1 SV=2	FAF1	11.5685	11.2716	11.2783	11.1765	11.4413	11.5173	11.5436	11.5434	10.865	11.2885	10.9572	11.1421
Q3TDN2	>sp|Q3TDN2|FAF2_MOUSE FAS-associated factor 2 OS=Mus musculus (Mouse) OX=10090 GN=Faf2 PE=1 SV=2	FAF2	12.3838	12.4481	12.3355	11.7699	12.5606	12.3059	12.5379	12.4975	12.6598	12.2749	12.3604	12.5802
Q8R0F8	>sp|Q8R0F8|FAHD1_MOUSE Acylpyruvase FAHD1, mitochondrial OS=Mus musculus (Mouse) OX=10090 GN=Fahd1 PE=1 SV=2	FAHD1	11.3777	11.1083	10.9118	10.7926	11.1977	10.3571	11.6172	11.5027	11.8757	11.0865	11.3498	11.3749
Q3TC72	>sp|Q3TC72|FAHD2_MOUSE Fumarylacetoacetate hydrolase domain-containing protein 2A OS=Mus musculus (Mouse) OX=10090 GN=Fahd2 PE=1 SV=1	FAHD2	12.6414	12.8163	12.9351	12.9655	12.6687	12.6419	12.812	12.8893	12.9434	12.8504	13.1347	12.8497
Q8VE88	>sp|Q8VE88|F1142_MOUSE Protein FAM114A2 OS=Mus musculus (Mouse) OX=10090 GN=Fam114a2 PE=1 SV=2	FAM114A2	10.6695	10.802	10.3565	10.5438	10.4778	10.5543	10.5951	11.0186	10.8287		10.8643	10.4877
Q6A0A9	>sp|Q6A0A9|F120A_MOUSE Constitutive coactivator of PPAR-gamma-like protein 1 OS=Mus musculus (Mouse) OX=10090 GN=FAM120A PE=1 SV=2	FAM120A	11.6504	11.5964	11.2675	11.4908	11.3087	11.4552	11.6642	11.6339	11.5102	11.27	11.2251	11.4165
Q6P9N1	>sp|Q6P9N1|HYCCI_MOUSE Hyccin OS=Mus musculus (Mouse) OX=10090 GN=Fam126a PE=1 SV=3	FAM126A	11.1387	11.6252	11.2345	11.486	11.1313	11.7933	11.3675	11.5732	11.5234	11.1255	11.208	11.564
Q9CR98	>sp|Q9CR98|F136A_MOUSE Protein FAM136A OS=Mus musculus (Mouse) OX=10090 GN=Fam136a PE=1 SV=1	FAM136A	12.3981	12.5698	12.9619	12.8603	12.5238	12.2939	12.7092	12.7989	13.0753	13.4279	13.482	13.1225
Q8CDM8	>sp|Q8CDM8|F16B1_MOUSE Protein FAM160B1 OS=Mus musculus (Mouse) OX=10090 GN=Fam160b1 PE=1 SV=2	FAM160B1	10.5097	10.1259	9.81358		10.0628	10.2822	10.1131	10.6444	10.4361	10.6773	10.2514	9.84473
Q9D6U8	>sp|Q9D6U8|F162A_MOUSE Protein FAM162A OS=Mus musculus (Mouse) OX=10090 GN=Fam162a PE=1 SV=1	FAM162A	11.5888	11.6196	11.62	11.7784	11.8399	11.5027	11.5766	11.0838	12.0925	11.935	12.3196	12.11
Q3TNH5	>sp|Q3TNH5|F172A_MOUSE Cotranscriptional regulator FAM172A OS=Mus musculus (Mouse) OX=10090 GN=Fam172a PE=1 SV=2	FAM172A	10.025	10.6647	10.1441	11.0023	11.0437	10.8184	10.8786	10.7587	10.4965	10.3894	9.96361	11.002
Q8VCS3	>sp|Q8VCS3|XYLK_MOUSE Glycosaminoglycan xylosylkinase OS=Mus musculus (Mouse) OX=10090 GN=Fam20b PE=1 SV=1	FAM20B	11.0728	11.0189	10.6786	11.1056	11.2506	10.9159	11.3203	10.6688	11.2322	11.1636	11.3495	10.9259
Q8BGY7	>sp|Q8BGY7|F210A_MOUSE Protein FAM210A OS=Mus musculus (Mouse) OX=10090 GN=Fam210a PE=1 SV=1	FAM210A	11.9692	12.1989	12.6153	11.8049	11.8962	11.0248	12.243	11.68	12.4651	12.2761	12.2782	12.4371
Q9D8B6	>sp|Q9D8B6|F210B_MOUSE Protein FAM210B, mitochondrial OS=Mus musculus (Mouse) OX=10090 GN=Fam210b PE=1 SV=3	FAM210B	10.9901	11.0366	10.7295	9.99106	10.3875	10.8377	10.6594	10.9851	11.01	11.2674	10.9178	11.4848
Q8C0Z1	>sp|Q8C0Z1|F234A_MOUSE Protein FAM234A OS=Mus musculus (Mouse) OX=10090 GN=Fam234a PE=1 SV=1	FAM234A	10.3393	10.5404	11.3457	11.0382	10.906	10.6345	9.60261	10.2891	10.5777	10.6414	10.7597	10.0921
Q9D8T0	>sp|Q9D8T0|FAM3A_MOUSE Protein FAM3A OS=Mus musculus (Mouse) OX=10090 GN=Fam3a PE=2 SV=1	FAM3A	10.6295	11.0574	10.4664	11.8181	11.3855	11.1402	11.126	10.7971	10.399	11.4709	10.1372	11.33
Q91VU0	>sp|Q91VU0|FAM3C_MOUSE Protein FAM3C OS=Mus musculus (Mouse) OX=10090 GN=Fam3c PE=1 SV=1	FAM3C	11.1917	11.3603	11.4613	11.3704	11.1297	11.338	11.4575	11.5155	11.0508	11.1024	11.2421	10.7782
Q8BHZ0	>sp|Q8BHZ0|FA49A_MOUSE Protein FAM49A OS=Mus musculus (Mouse) OX=10090 GN=Fam49a PE=1 SV=1	FAM49A	9.17956	9.7388	9.60513	9.96124	9.95204	10.6222	10.2258	9.38194	9.78016	9.44345	10.3708	10.404
Q921M7	>sp|Q921M7|FA49B_MOUSE Protein FAM49B OS=Mus musculus (Mouse) OX=10090 GN=Fam49b PE=1 SV=1	FAM49B	10.1341	9.63408		9.97949	9.79891	10.4635	10.6007	10.7148	10.4918	11.4408	10.4576	11.1165
Q9WV03	>sp|Q9WV03|FA50A_MOUSE Protein FAM50A OS=Mus musculus (Mouse) OX=10090 GN=Fam50a PE=1 SV=1	FAM50A	11.4874	12.0512		10.5559	11.5063	10.4626	11.6235	11.5387	11.4927	11.2298	11.0073	11.7247
Q3URQ4	>tr|Q3URQ4|Q3URQ4_MOUSE RDD domain-containing protein OS=Mus musculus (Mouse) OX=10090 GN=Fam8a1 PE=1 SV=1	FAM8A1	10.475	11.2193	10.292	9.98287	11.0186	9.97533	10.7295	11.0694	11.1576	11.3307	11.0777	10.6242
Q3UVG3	>sp|Q3UVG3|F91A1_MOUSE Protein FAM91A1 OS=Mus musculus (Mouse) OX=10090 GN=Fam91a1 PE=1 SV=1	FAM91A1							10.738	10.8005	10.7006	11.0432	11.0405	10.7154
Q3TJZ6	>sp|Q3TJZ6|FA98A_MOUSE Protein FAM98A OS=Mus musculus (Mouse) OX=10090 GN=Fam98a PE=1 SV=1	FAM98A	10.4391	10.4363	9.68958	11.1141	10.351	10.2126	10.1859	10.4036	10.5896	10.6355	9.88715	9.81939
Q3TJZ6;Q80VD1	>sp|Q3TJZ6|FA98A_MOUSE Protein FAM98A OS=Mus musculus (Mouse) OX=10090 GN=Fam98a PE=1 SV=1;>sp|Q80VD1|FA98B_MOUSE Protein FAM98B OS=Mus musculus (Mouse) OX=10090 GN=Fam98b PE=1 SV=1	FAM98A;FAM98B	11.6085	11.0857	10.6203	11.0986	10.247	11.0618	11.8364	11.0786	11.8376	10.99	9.85972	11.105
Q80VD1	>sp|Q80VD1|FA98B_MOUSE Protein FAM98B OS=Mus musculus (Mouse) OX=10090 GN=Fam98b PE=1 SV=1	FAM98B	12.3866	12.2288	11.818	11.991	11.9518	11.8517	12.3368	12.5007	12.2551	11.7944	12.1588	12.0522
Q922J9	>sp|Q922J9|FACR1_MOUSE Fatty acyl-CoA reductase 1 OS=Mus musculus (Mouse) OX=10090 GN=Far1 PE=1 SV=1	FAR1	11.3401	11.87	11.4809	11.4503	11.7516	11.5181	10.819	10.9755	10.6976	10.9859	11.1211	11.1459
F8VPU2	>sp|F8VPU2|FARP1_MOUSE FERM, ARHGEF and pleckstrin domain-containing protein 1 OS=Mus musculus (Mouse) OX=10090 GN=Farp1 PE=1 SV=1	FARP1	11.1127	10.9183	11.4277	11.2215	10.9924	11.1587	10.9089	10.663	10.4325	11.2667	10.5837	10.6276
Q99M01	>sp|Q99M01|SYFM_MOUSE Phenylalanine--tRNA ligase, mitochondrial OS=Mus musculus (Mouse) OX=10090 GN=Fars2 PE=1 SV=1	FARS2	11.0655	11.4108	11.5634	11.3093	11.5293	11.047	11.2522	11.2184	11.6981	11.416	11.2312	11.2454
Q8C0C7	>sp|Q8C0C7|SYFA_MOUSE Phenylalanine--tRNA ligase alpha subunit OS=Mus musculus (Mouse) OX=10090 GN=Farsa PE=1 SV=1	FARSA	11.3554	11.2374	11.7671	11.512	11.493	11.6397	11.5926	11.7233	11.6427	11.54	11.6829	11.6264
Q9WUA2	>sp|Q9WUA2|SYFB_MOUSE Phenylalanine--tRNA ligase beta subunit OS=Mus musculus (Mouse) OX=10090 GN=Farsb PE=1 SV=2	FARSB	12.2738	12.2733	12.1246	12.2203	12.0239	12.4132	12.4355	12.5942	12.2169	12.1228	11.901	12.1987
P19096	>sp|P19096|FAS_MOUSE Fatty acid synthase OS=Mus musculus (Mouse) OX=10090 GN=Fasn PE=1 SV=2	FASN	11.8866	11.4225	11.556	11.4744	11.2327	11.4958	11.667	11.947	11.5332	11.445	11.4457	11.4804
Q6DI86	>sp|Q6DI86|FAKD1_MOUSE FAST kinase domain-containing protein 1, mitochondrial OS=Mus musculus (Mouse) OX=10090 GN=Fastkd1 PE=2 SV=1	FASTKD1							10.4703	11.217	11.1065	11.9167		11.1826
Q922E6	>sp|Q922E6|FAKD2_MOUSE FAST kinase domain-containing protein 2, mitochondrial OS=Mus musculus (Mouse) OX=10090 GN=Fastkd2 PE=2 SV=2	FASTKD2	11.0598	11.1336	11.4806	11.5332	11.3577	10.6812	11.0275	10.7013	11.2794		11.0763	11.1244
P35550	>sp|P35550|FBRL_MOUSE rRNA 2'-O-methyltransferase fibrillarin OS=Mus musculus (Mouse) OX=10090 GN=Fbl PE=1 SV=2	FBL	12.931	12.8896	13.2946	12.8811	13.007	13.0419	12.7497	12.7872	12.7527	12.8823	12.7554	12.7218
P35550;Q80WS3	>sp|P35550|FBRL_MOUSE rRNA 2'-O-methyltransferase fibrillarin OS=Mus musculus (Mouse) OX=10090 GN=Fbl PE=1 SV=2;>sp|Q80WS3|FBLL1_MOUSE rRNA/tRNA 2'-O-methyltransferase fibrillarin-like protein 1 OS=Mus musculus (Mouse) OX=10090 GN=Fbll1 PE=1 SV=1	FBL;FBLL1	13.5112	13.7574	12.9337	11.9953	13.2407	13.1379	13.3288	13.3903	13.2586	12.8203	12.5349	13.3352
Q80WS3	>sp|Q80WS3|FBLL1_MOUSE rRNA/tRNA 2'-O-methyltransferase fibrillarin-like protein 1 OS=Mus musculus (Mouse) OX=10090 GN=Fbll1 PE=1 SV=1	FBLL1	15.8354	15.7214	16.3386		16.0542	16.1158	15.5446	15.6314	15.5104	15.681	15.9483	15.5812
Q61554	>sp|Q61554|FBN1_MOUSE Fibrillin-1 OS=Mus musculus (Mouse) OX=10090 GN=Fbn1 PE=1 SV=2	FBN1	9.34086	10.3219	10.4566	10.091	9.66651
Q9CZV8	>sp|Q9CZV8|FXL20_MOUSE F-box/LRR-repeat protein 20 OS=Mus musculus (Mouse) OX=10090 GN=Fbxl20 PE=1 SV=3	FBXL20	11.6437	11.7296	10.9529	10.3866	11.3409	10.5765	11.6887	11.6608	11.6905	11.0465	11.2051	11.84
Q78JE5	>sp|Q78JE5|FBX22_MOUSE F-box only protein 22 OS=Mus musculus (Mouse) OX=10090 GN=Fbxo22 PE=1 SV=2	FBXO22	10.7211	10.3903	10.9224	11.4735	10.6584	10.9813	10.7835	11.1564	10.9852	11.1193	11.2782	10.646
Q9DC63	>sp|Q9DC63|FBX3_MOUSE F-box only protein 3 OS=Mus musculus (Mouse) OX=10090 GN=Fbxo3 PE=1 SV=1	FBXO3							10.4821	11.2887	10.8937		10.3275	11.3862
Q8BMI0	>sp|Q8BMI0|FBX38_MOUSE F-box only protein 38 OS=Mus musculus (Mouse) OX=10090 GN=Fbxo38 PE=1 SV=1	FBXO38							13.2244	12.7769	12.7232	13.6698		12.6626
Q9QZN4	>sp|Q9QZN4|FBX6_MOUSE F-box only protein 6 OS=Mus musculus (Mouse) OX=10090 GN=Fbxo6 PE=1 SV=1	FBXO6	10.8356	10.5284	11.7322	9.68965	10.7391	10.9758	10.5914	10.4467	10.8241	11.3424	10.7559	10.8487
Q8BIA4	>sp|Q8BIA4|FBXW8_MOUSE F-box/WD repeat-containing protein 8 OS=Mus musculus (Mouse) OX=10090 GN=Fbxw8 PE=1 SV=2	FBXW8	10.6414	9.99161		9.88292	10.6065	10.3122
Q61559	>sp|Q61559|FCGRN_MOUSE IgG receptor FcRn large subunit p51 OS=Mus musculus (Mouse) OX=10090 GN=Fcgrt PE=1 SV=1	FCGRT	12.761	13.0079	11.8422	11.4152	12.5305	11.9083	12.2325	12.6372	12.7405	11.3375	12.6967	11.8379
Q3UQN2	>sp|Q3UQN2|FCHO2_MOUSE F-BAR domain only protein 2 OS=Mus musculus (Mouse) OX=10090 GN=Fcho2 PE=1 SV=1	FCHO2	10.6531	10.6867	10.5804		10.668	11.3976	10.9156	10.6497	10.496		10.4053	10.3366
Q920E5	>sp|Q920E5|FPPS_MOUSE Farnesyl pyrophosphate synthase OS=Mus musculus (Mouse) OX=10090 GN=Fdps PE=1 SV=1	FDPS	10.5235	10.5907	10.6755	10.8982	10.2311	10.4569	10.1748	9.7185	9.97682	9.87211	10.6432	9.63763
P46656	>sp|P46656|ADX_MOUSE Adrenodoxin, mitochondrial OS=Mus musculus (Mouse) OX=10090 GN=Fdx1 PE=1 SV=1	FDX1	13.3065	13.48	13.8825	13.9512	13.946	13.9372	13.6046	13.5908	13.7004	14.6991	14.5483	14.0103
Q9CPW2	>sp|Q9CPW2|FDX2_MOUSE Ferredoxin-2, mitochondrial OS=Mus musculus (Mouse) OX=10090 GN=Fdx2 PE=1 SV=1	FDX2	11.3255	11.9042	12.2331	11.9388	12.3307	11.9695	11.3944	11.6756	12.4515	12.3285	12.3902	12.2998
Q61578	>sp|Q61578|ADRO_MOUSE NADPH:adrenodoxin oxidoreductase, mitochondrial OS=Mus musculus (Mouse) OX=10090 GN=Fdxr PE=1 SV=1	FDXR	16.538	16.7467	17.0331	17.1116	17.0081	16.6323	16.7839	16.7005	17.1141	17.2633	17.2722	17.0857
P22315	>sp|P22315|HEMH_MOUSE Ferrochelatase, mitochondrial OS=Mus musculus (Mouse) OX=10090 GN=Fech PE=1 SV=2	FECH	11.5459	11.8051	11.729	11.7367	11.9328	11.9353	12.1586	12.1114	11.8635	11.785	11.7714	12.1056
P39749	>sp|P39749|FEN1_MOUSE Flap endonuclease 1 OS=Mus musculus (Mouse) OX=10090 GN=Fen1 PE=1 SV=1	FEN1	11.9659	11.3344	11.9547	12.1318	11.9809	12.2315	11.7265	11.815	11.7586	11.679	11.7638	11.8554
Q8CIB5	>sp|Q8CIB5|FERM2_MOUSE Fermitin family homolog 2 OS=Mus musculus (Mouse) OX=10090 GN=Fermt2 PE=1 SV=1	FERMT2	11.28	11.1116	10.9356	11.4022	11.0389	11.3305	11.4131	11.2982	11.1015	11.2519	10.9067	11.0956
E9PV24	>sp|E9PV24|FIBA_MOUSE Fibrinogen alpha chain OS=Mus musculus (Mouse) OX=10090 GN=Fga PE=1 SV=1	FGA	11.3218	11.629	10.8193	10.5361	10.8595	10.8052
P61148	>sp|P61148|FGF1_MOUSE Fibroblast growth factor 1 OS=Mus musculus (Mouse) OX=10090 GN=Fgf1 PE=1 SV=1	FGF1	11.5872	10.9445	11.7693	11.6168	11.5147	11.5928	11.5559	11.8285	11.6445	12.1623		11.9055
Q8VCM7	>sp|Q8VCM7|FIBG_MOUSE Fibrinogen gamma chain OS=Mus musculus (Mouse) OX=10090 GN=Fgg PE=1 SV=1	FGG	11.6261	12.0397	10.7149	10.6426	11.0496	10.908
P97807	>sp|P97807|FUMH_MOUSE Fumarate hydratase, mitochondrial OS=Mus musculus (Mouse) OX=10090 GN=Fh PE=1 SV=3	FH	13.701	14.1359	14.1903	14.1931	14.0773	13.8372	13.9546	13.8631	14.2041	14.2244	14.1371	14.1483
O89106	>sp|O89106|FHIT_MOUSE Bis(5'-adenosyl)-triphosphatase OS=Mus musculus (Mouse) OX=10090 GN=Fhit PE=1 SV=3	FHIT	10.7496	10.7022	10.7322	10.7777	10.7745	10.4441	10.6604	10.2811	10.7845	11.1989	11.1749	10.8223
P97447	>sp|P97447|FHL1_MOUSE Four and a half LIM domains protein 1 OS=Mus musculus (Mouse) OX=10090 GN=Fhl1 PE=1 SV=3	FHL1	13.3356	13.5325	13.5894	13.7951	12.9653	12.9201	13.1979	13.3663	12.7203	13.7562	12.2721	12.7834
Q9R059	>sp|Q9R059|FHL3_MOUSE Four and a half LIM domains protein 3 OS=Mus musculus (Mouse) OX=10090 GN=Fhl3 PE=1 SV=2	FHL3	10.6588	10.6509	11.105	10.654	11.0899	11.116
Q9D824	>sp|Q9D824|FIP1_MOUSE Pre-mRNA 3'-end-processing factor FIP1 OS=Mus musculus (Mouse) OX=10090 GN=Fip1l1 PE=1 SV=1	FIP1L1	10.9307	10.3726	10.9296	10.961	10.2604	11.0304	10.6759	10.8236	10.659	10.8823	10.5888	10.766
Q9CQ92	>sp|Q9CQ92|FIS1_MOUSE Mitochondrial fission 1 protein OS=Mus musculus (Mouse) OX=10090 GN=Fis1 PE=1 SV=1	FIS1	11.8105	11.7779	11.8659	11.7118	11.9094	11.4091	12.0048	12.0442	12.1959	12.0014	11.5643	12.0772
P59266	>sp|P59266|FITM2_MOUSE Fat storage-inducing transmembrane protein 2 OS=Mus musculus (Mouse) OX=10090 GN=Fitm2 PE=1 SV=1	FITM2	11.3441	11.6403	11.916	11.4511	11.6213	10.8993	11.2341	11.138	11.6045	11.7142	11.3514	11.568
Q61576	>sp|Q61576|FKB10_MOUSE Peptidyl-prolyl cis-trans isomerase FKBP10 OS=Mus musculus (Mouse) OX=10090 GN=Fkbp10 PE=1 SV=2	FKBP10	11.6866	11.8203	11.6946	11.9141	11.9322	11.633	11.426	11.2147	11.0506	11.3533	11.5902	10.9351
Q61576;Q9Z247	>sp|Q61576|FKB10_MOUSE Peptidyl-prolyl cis-trans isomerase FKBP10 OS=Mus musculus (Mouse) OX=10090 GN=Fkbp10 PE=1 SV=2;>sp|Q9Z247|FKBP9_MOUSE Peptidyl-prolyl cis-trans isomerase FKBP9 OS=Mus musculus (Mouse) OX=10090 GN=Fkbp9 PE=1 SV=1	FKBP10;FKBP9	11.0495	11.4443	11.641	11.8678	11.7554	10.9695	9.9578	10.9605	10.2659		11.3598	11.007
Q9D1M7	>sp|Q9D1M7|FKB11_MOUSE Peptidyl-prolyl cis-trans isomerase FKBP11 OS=Mus musculus (Mouse) OX=10090 GN=Fkbp11 PE=1 SV=1	FKBP11	11.3085	11.1666	11.0247	11.3002	11.6872	11.01	11.1638	11.1053	11.0644	11.2941	11.2097	11.4164
Q6P9Q6	>sp|Q6P9Q6|FKB15_MOUSE FK506-binding protein 15 OS=Mus musculus (Mouse) OX=10090 GN=Fkbp15 PE=1 SV=2	FKBP15							9.26738	9.29261	9.29878	9.9676	9.85252	9.259
P26883	>sp|P26883|FKB1A_MOUSE Peptidyl-prolyl cis-trans isomerase FKBP1A OS=Mus musculus (Mouse) OX=10090 GN=Fkbp1a PE=1 SV=2	FKBP1A	13.1024	12.2885	12.7028	12.0298	11.5711	12.7471	12.2677	12.4151	12.4862	12.2111	11.9857	11.958
P45878	>sp|P45878|FKBP2_MOUSE Peptidyl-prolyl cis-trans isomerase FKBP2 OS=Mus musculus (Mouse) OX=10090 GN=Fkbp2 PE=1 SV=1	FKBP2	13.491	13.1667	13.4122	13.0579	13.2549	13.2853	12.8907	13.0928	13.2636	13.8054	13.7509	13.4214
Q62446	>sp|Q62446|FKBP3_MOUSE Peptidyl-prolyl cis-trans isomerase FKBP3 OS=Mus musculus (Mouse) OX=10090 GN=Fkbp3 PE=1 SV=2	FKBP3	12.5936	12.48	12.0481	12.3628	12.4625	12.5697	12.8275	12.4308	12.6899	12.2638	12.3921	12.8513
P30416	>sp|P30416|FKBP4_MOUSE Peptidyl-prolyl cis-trans isomerase FKBP4 OS=Mus musculus (Mouse) OX=10090 GN=Fkbp4 PE=1 SV=5	FKBP4	11.5213	11.456	11.7316	11.716	11.7122	11.9156	11.7464	11.7735	11.6203	11.6195	11.4919	11.5228
Q64378	>sp|Q64378|FKBP5_MOUSE Peptidyl-prolyl cis-trans isomerase FKBP5 OS=Mus musculus (Mouse) OX=10090 GN=Fkbp5 PE=1 SV=1	FKBP5	11.3819	11.1162	11.5113	11.5984	11.409	11.3791	11.4608	11.3386	10.9114	11.124	11.2789	11.0886
O54998	>sp|O54998|FKBP7_MOUSE Peptidyl-prolyl cis-trans isomerase FKBP7 OS=Mus musculus (Mouse) OX=10090 GN=Fkbp7 PE=1 SV=1	FKBP7	11.1523	11.6587	11.7673	12.5046	11.8004	11.7282	11.4011	11.1407	11.0227	11.7539	11.7663	12.1742
O35465	>sp|O35465|FKBP8_MOUSE Peptidyl-prolyl cis-trans isomerase FKBP8 OS=Mus musculus (Mouse) OX=10090 GN=Fkbp8 PE=1 SV=2	FKBP8	12.2271	12.2078	12.1659	12.1036	12.0821	12.1717	12.2207	12.4169	12.5478	11.9514	12.2182	12.3746
Q9Z247	>sp|Q9Z247|FKBP9_MOUSE Peptidyl-prolyl cis-trans isomerase FKBP9 OS=Mus musculus (Mouse) OX=10090 GN=Fkbp9 PE=1 SV=1	FKBP9	11.5711	11.2194	12.0982	11.9985	12.0099	11.8927	11.1163	11.5943	11.3161	12.0339	11.7331	11.5453
Q8R123	>sp|Q8R123|FAD1_MOUSE FAD synthase OS=Mus musculus (Mouse) OX=10090 GN=Flad1 PE=1 SV=1	FLAD1	10.2797	9.94304		9.69894	9.56526	10.1246	10.0979	10.3855	10.8767	10.6017	10.2544	10.5538
Q9JJ28	>sp|Q9JJ28|FLII_MOUSE Protein flightless-1 homolog OS=Mus musculus (Mouse) OX=10090 GN=Flii PE=1 SV=1	FLII	11.5542	11.738	11.0025	11.0095	11.5022	11.0076	11.4307	11.4712	11.0573	11.4929	11.2998	11.1216
Q8BTM8	>sp|Q8BTM8|FLNA_MOUSE Filamin-A OS=Mus musculus (Mouse) OX=10090 GN=Flna PE=1 SV=5	FLNA	12.654	12.5595	11.966	12.3939	12.1407	12.5334	12.295	12.2468	11.8217	12.0841	11.922	12.0358
Q8BTM8;Q8VHX6	>sp|Q8BTM8|FLNA_MOUSE Filamin-A OS=Mus musculus (Mouse) OX=10090 GN=Flna PE=1 SV=5;>sp|Q8VHX6|FLNC_MOUSE Filamin-C OS=Mus musculus (Mouse) OX=10090 GN=Flnc PE=1 SV=3	FLNA;FLNC	10.8906	11.1459		11.17	10.7615	11.2166	12.4904	12.9695	11.3738	14.0166		13.6992
Q80X90	>sp|Q80X90|FLNB_MOUSE Filamin-B OS=Mus musculus (Mouse) OX=10090 GN=Flnb PE=1 SV=3	FLNB	11.3515	11.266	10.7289	11.1349	11.0527	10.8911	11.1429	11.2587	11.1656	11.0619	11.2675	11.1881
Q80X90;Q8BTM8;Q8VHX6	>sp|Q80X90|FLNB_MOUSE Filamin-B OS=Mus musculus (Mouse) OX=10090 GN=Flnb PE=1 SV=3;>sp|Q8BTM8|FLNA_MOUSE Filamin-A OS=Mus musculus (Mouse) OX=10090 GN=Flna PE=1 SV=5;>sp|Q8VHX6|FLNC_MOUSE Filamin-C OS=Mus musculus (Mouse) OX=10090 GN=Flnc PE=1 SV=3	FLNB;FLNA;FLNC	13.0157	12.6447	12.4798	13.3002	12.8264	13.3794	12.5713	12.2319	12.1683	12.7092	12.3992	12.5972
Q80X90;Q8VHX6	>sp|Q80X90|FLNB_MOUSE Filamin-B OS=Mus musculus (Mouse) OX=10090 GN=Flnb PE=1 SV=3;>sp|Q8VHX6|FLNC_MOUSE Filamin-C OS=Mus musculus (Mouse) OX=10090 GN=Flnc PE=1 SV=3	FLNB;FLNC	11.7883	11.6069	11.0517	10.8185	10.346	11.5294	10.8766	10.7602	11.0716	10.7677	10.5521	10.4773
Q8VHX6	>sp|Q8VHX6|FLNC_MOUSE Filamin-C OS=Mus musculus (Mouse) OX=10090 GN=Flnc PE=1 SV=3	FLNC	15.6318	14.9479	12.8331	14.8425	14.8605		14.8604	15.089	14.5831		14.184	14.5365
O08917	>sp|O08917|FLOT1_MOUSE Flotillin-1 OS=Mus musculus (Mouse) OX=10090 GN=Flot1 PE=1 SV=1	FLOT1	12.1438	12.4529	12.1443	12.258	12.2523	12.0387	12.228	11.9469	12.3449	12.1782	12.3166	12.2303
Q60634	>sp|Q60634|FLOT2_MOUSE Flotillin-2 OS=Mus musculus (Mouse) OX=10090 GN=Flot2 PE=1 SV=2	FLOT2	12.2549	12.5505	12.2852	12.361	12.3297	12.2319	12.2474	11.9685	12.4009	12.3188	12.3354	12.259
P50285	>sp|P50285|FMO1_MOUSE Dimethylaniline monooxygenase [N-oxide-forming] 1 OS=Mus musculus (Mouse) OX=10090 GN=Fmo1 PE=1 SV=1	FMO1	10.9888	11.7481	11.5303	10.7649	11.1412	10.8334	10.4951	10.3475	11.0919		11.2461	11.3563
Q8K2I3	>sp|Q8K2I3|FMO2_MOUSE Dimethylaniline monooxygenase [N-oxide-forming] 2 OS=Mus musculus (Mouse) OX=10090 GN=Fmo2 PE=1 SV=3	FMO2	12.5859	12.1347	11.9775	11.9524	12.208	11.935	10.6638	10.6661	10.6887	11.0678	11.4251	10.8288
P97872	>sp|P97872|FMO5_MOUSE Dimethylaniline monooxygenase [N-oxide-forming] 5 OS=Mus musculus (Mouse) OX=10090 GN=Fmo5 PE=1 SV=4	FMO5	9.97537	10.3592	10.8423	10.3218	10.2931		10.3963	10.3599	10.3249		10.4373	10.2504
P35922	>sp|P35922|FMR1_MOUSE Synaptic functional regulator FMR1 OS=Mus musculus (Mouse) OX=10090 GN=Fmr1 PE=1 SV=1	FMR1	11.0209	10.7684	11.0031	11.7677	10.7036	10.8653	11.2263	10.9693	10.9405	11.3717	11.3547	10.9904
P35922;Q61584;Q9WVR4	>sp|P35922|FMR1_MOUSE Synaptic functional regulator FMR1 OS=Mus musculus (Mouse) OX=10090 GN=Fmr1 PE=1 SV=1;>sp|Q61584|FXR1_MOUSE Fragile X mental retardation syndrome-related protein 1 OS=Mus musculus (Mouse) OX=10090 GN=Fxr1 PE=1 SV=2;>sp|Q9WVR4|FXR2_MOUSE Fragile X mental retardation syndrome-related protein 2 OS=Mus musculus (Mouse) OX=10090 GN=Fxr2 PE=1 SV=1	FMR1;FXR1;FXR2	13.9212	13.6833	14.0306	14.5449	14.06	14.5444	14.1516	14.029	13.836	14.6779	14.186	13.9433
P35922;Q9WVR4	>sp|P35922|FMR1_MOUSE Synaptic functional regulator FMR1 OS=Mus musculus (Mouse) OX=10090 GN=Fmr1 PE=1 SV=1;>sp|Q9WVR4|FXR2_MOUSE Fragile X mental retardation syndrome-related protein 2 OS=Mus musculus (Mouse) OX=10090 GN=Fxr2 PE=1 SV=1	FMR1;FXR2	11.184	10.6134		10.6396	10.886	11.5659	11.3024	11.0909	11.5127	11.4721	11.3324	10.8533
Q8K274	>sp|Q8K274|KT3K_MOUSE Ketosamine-3-kinase OS=Mus musculus (Mouse) OX=10090 GN=Fn3krp PE=1 SV=2	FN3KRP	10.5777	9.79188		10.4552	10.333	10.2538	10.1149	10.2736	9.89244		10.1804	9.80685
Q6ZQ03	>sp|Q6ZQ03|FNBP4_MOUSE Formin-binding protein 4 OS=Mus musculus (Mouse) OX=10090 GN=Fnbp4 PE=1 SV=2	FNBP4							10.358	10.9724	10.5941	10.4103		10.241
Q8BX90	>sp|Q8BX90|FND3A_MOUSE Fibronectin type-III domain-containing protein 3A OS=Mus musculus (Mouse) OX=10090 GN=Fndc3a PE=1 SV=3	FNDC3A	10.9277	11.6378	11.1725		11.7276	11.0421	10.3456	11.1808	11.3717		11.7559	10.1271
Q61239	>sp|Q61239|FNTA_MOUSE Protein farnesyltransferase/geranylgeranyltransferase type-1 subunit alpha OS=Mus musculus (Mouse) OX=10090 GN=Fnta PE=1 SV=1	FNTA	10.4668	10.3944		9.82071	9.54036	10.067	10.5678	10.3228	10.7122	10.6864	10.1834	10.6207
Q8K2I1	>sp|Q8K2I1|FNTB_MOUSE Protein farnesyltransferase subunit beta OS=Mus musculus (Mouse) OX=10090 GN=Fntb PE=1 SV=1	FNTB							8.97064	9.11241	9.10429	10.1455		9.89776
O35409	>sp|O35409|FOLH1_MOUSE Glutamate carboxypeptidase 2 OS=Mus musculus (Mouse) OX=10090 GN=Folh1 PE=1 SV=2	FOLH1	10.9937	11.0023	11.5033	10.9384	11.1325	10.0701
Q684R7	>sp|Q684R7|FREM1_MOUSE FRAS1-related extracellular matrix protein 1 OS=Mus musculus (Mouse) OX=10090 GN=Frem1 PE=1 SV=1	FREM1	10.9871	10.5105	11.7312		10.8189	11.158
P97376	>sp|P97376|FRG1_MOUSE Protein FRG1 OS=Mus musculus (Mouse) OX=10090 GN=Frg1 PE=1 SV=2	FRG1	11.1242	11.3971	10.6026	11.32	11.1628	10.9385	11.0907	10.9475	11.1213	9.84733	11.4678	10.6996
Q920B0	>sp|Q920B0|FRM4B_MOUSE FERM domain-containing protein 4B OS=Mus musculus (Mouse) OX=10090 GN=Frmd4b PE=1 SV=2	FRMD4B	12.325	12.1249	12.8233	12.2243	12.1175	12.5611	12.081	12.319	12.3292	12.6783	12.6156	11.2916
A2AFR3	>sp|A2AFR3|FRPD4_MOUSE FERM and PDZ domain-containing protein 4 OS=Mus musculus (Mouse) OX=10090 GN=Frmpd4 PE=1 SV=1	FRMPD4	13.1991	12.26		12.9604	13.3213	13.3607
E9Q8I9	>sp|E9Q8I9|FRY_MOUSE Protein furry homolog OS=Mus musculus (Mouse) OX=10090 GN=Fry PE=1 SV=1	FRY							10.9839	9.92514	10.3909		10.8635	10.4665
Q61553	>sp|Q61553|FSCN1_MOUSE Fascin OS=Mus musculus (Mouse) OX=10090 GN=Fscn1 PE=1 SV=4	FSCN1	10.101	10.3842	10.9419		10.4127	10.5289
P09528	>sp|P09528|FRIH_MOUSE Ferritin heavy chain OS=Mus musculus (Mouse) OX=10090 GN=Fth1 PE=1 SV=2	FTH1	13.3533	13.35	13.5259	13.4718	13.5416	13.6408	13.7655	13.927	13.4172	13.5118	13.5939	13.7931
P29391	>sp|P29391|FRIL1_MOUSE Ferritin light chain 1 OS=Mus musculus (Mouse) OX=10090 GN=Ftl1 PE=1 SV=2	FTL1	13.9853	13.9904	14.4174	14.1446	14.1507	14.1635	14.4702	14.4803	14.0702	14.3705	14.0253	14.2628
Q8BGW1	>sp|Q8BGW1|FTO_MOUSE Alpha-ketoglutarate-dependent dioxygenase FTO OS=Mus musculus (Mouse) OX=10090 GN=Fto PE=1 SV=1	FTO							10.8436	10.277	10.5455		10.582	10.6835
Q9DBE9	>sp|Q9DBE9|SPB1_MOUSE pre-rRNA 2'-O-ribose RNA methyltransferase FTSJ3 OS=Mus musculus (Mouse) OX=10090 GN=Ftsj3 PE=1 SV=1	FTSJ3	10.0522	10.1179	10.4855		10.3818	9.60382	10.0849	9.89595	9.94194	9.76835	10.0538	9.86547
Q91WJ8	>sp|Q91WJ8|FUBP1_MOUSE Far upstream element-binding protein 1 OS=Mus musculus (Mouse) OX=10090 GN=Fubp1 PE=1 SV=1	FUBP1	11.9217	11.6996	11.5915	11.8889	11.786	12.169	11.9407	11.9241	11.5727	11.1967	11.4872	11.5047
Q3TIX6	>tr|Q3TIX6|Q3TIX6_MOUSE Far upstream element (FUSE)-binding protein 3 OS=Mus musculus (Mouse) OX=10090 GN=Fubp3 PE=1 SV=1	FUBP3	11.6181	11.4404	11.7321	11.7543	11.2026	11.4623	11.6719	11.7526	11.5485	11.495	11.6608	11.2759
Q99LJ1	>sp|Q99LJ1|FUCO_MOUSE Tissue alpha-L-fucosidase OS=Mus musculus (Mouse) OX=10090 GN=Fuca1 PE=1 SV=1	FUCA1	12.7717	12.526	12.4705	12.7238	12.4357	12.1237	12.9031	13.09	12.8199	12.32	12.0986	12.7244
Q9DB70	>sp|Q9DB70|FUND1_MOUSE FUN14 domain-containing protein 1 OS=Mus musculus (Mouse) OX=10090 GN=Fundc1 PE=1 SV=1	FUNDC1							10.5736	10.3435	10.8174		10.64	10.6201
Q9D6K8	>sp|Q9D6K8|FUND2_MOUSE FUN14 domain-containing protein 2 OS=Mus musculus (Mouse) OX=10090 GN=Fundc2 PE=1 SV=1	FUNDC2	13.3408	13.2447	13.5958	13.1121	13.0225	13.1389	13.4285	13.3827	13.5791	13.8093	13.4849	13.6599
P23188	>sp|P23188|FURIN_MOUSE Furin OS=Mus musculus (Mouse) OX=10090 GN=Furin PE=1 SV=2	FURIN							9.96792	10.3877	10.5576	11.1163		9.75231
P56959	>sp|P56959|FUS_MOUSE RNA-binding protein FUS OS=Mus musculus (Mouse) OX=10090 GN=Fus PE=1 SV=1	FUS	12.7256	12.5056	12.5332	12.8741	12.5068	12.9257	12.4411	12.6672	12.2339	12.5675	12.6232	12.3785
Q8BHC9	>sp|Q8BHC9|FUT11_MOUSE Alpha-(1,3)-fucosyltransferase 11 OS=Mus musculus (Mouse) OX=10090 GN=Fut11 PE=1 SV=1	FUT11	11.9034	12.3285	11.6545	11.4571	11.8204	11.9255	11.5733	11.883	11.7959	10.2426	11.6677	11.7124
O35943	>sp|O35943|FRDA_MOUSE Frataxin, mitochondrial OS=Mus musculus (Mouse) OX=10090 GN=Fxn PE=1 SV=1	FXN	11.8587	11.1207	11.1375	11.0052	12.0039	11.3851	11.5405	11.7005	11.8483	11.6354	11.7156	11.8831
Q61584	>sp|Q61584|FXR1_MOUSE Fragile X mental retardation syndrome-related protein 1 OS=Mus musculus (Mouse) OX=10090 GN=Fxr1 PE=1 SV=2	FXR1	11.0622	11.046	11.1264	11.313	11.0177	11.3641	11.1481	11.316	11.1775	11.4727	11.0375	11.1196
Q9WVR4	>sp|Q9WVR4|FXR2_MOUSE Fragile X mental retardation syndrome-related protein 2 OS=Mus musculus (Mouse) OX=10090 GN=Fxr2 PE=1 SV=1	FXR2	10.3807	10.5554	10.5325		10.3126	10.3847	10.7499	10.6558	9.97817	9.60234	10.4176	10.4798
Q9Z239	>sp|Q9Z239|PLM_MOUSE Phospholemman OS=Mus musculus (Mouse) OX=10090 GN=Fxyd1 PE=1 SV=1	FXYD1	13.4075	12.8616	13.2254	11.58	12.4144	10.9107	13.1674	13.146	13.2253	12.9236	13.5124	12.483
Q9D164	>sp|Q9D164|FXYD6_MOUSE FXYD domain-containing ion transport regulator 6 OS=Mus musculus (Mouse) OX=10090 GN=Fxyd6 PE=1 SV=2	FXYD6	11.6475	10.4347	11.2192		10.1651	11.0172	11.1842	10.9599	10.7762		10.7198	10.8104
Q8VDC1	>sp|Q8VDC1|FYCO1_MOUSE FYVE and coiled-coil domain-containing protein 1 OS=Mus musculus (Mouse) OX=10090 GN=Fyco1 PE=1 SV=1	FYCO1							11.1836	11.4541	10.8832		11.707	11.0286
Q91Z49	>sp|Q91Z49|UIF_MOUSE UAP56-interacting factor OS=Mus musculus (Mouse) OX=10090 GN=Fyttd1 PE=1 SV=1	FYTTD1	10.1312	10.9097	10.77	11.1012	10.7909	10.5785	10.9098	10.7667	10.7016	11.4247	11.0982	10.8296
P97855	>sp|P97855|G3BP1_MOUSE Ras GTPase-activating protein-binding protein 1 OS=Mus musculus (Mouse) OX=10090 GN=G3bp1 PE=1 SV=1	G3BP1	11.9832	11.4827	11.8786	11.4999	11.5096	11.8691	11.8658	11.946	11.5546	11.2253	11.8538	11.8463
P97379	>sp|P97379|G3BP2_MOUSE Ras GTPase-activating protein-binding protein 2 OS=Mus musculus (Mouse) OX=10090 GN=G3bp2 PE=1 SV=2	G3BP2	11.1224	10.9925	10.7174	11.4816	11.2437	11.4395	11.2872	11.2238	10.9129	11.0342	11.1409	11.0255
P97379;P97855	>sp|P97379|G3BP2_MOUSE Ras GTPase-activating protein-binding protein 2 OS=Mus musculus (Mouse) OX=10090 GN=G3bp2 PE=1 SV=2;>sp|P97855|G3BP1_MOUSE Ras GTPase-activating protein-binding protein 1 OS=Mus musculus (Mouse) OX=10090 GN=G3bp1 PE=1 SV=1	G3BP2;G3BP1	11.8503	11.913	11.1416	12.2023	11.4334	12.339	12.1172	12.0944	10.8906	13.0276	11.7521	11.9284
Q00612	>sp|Q00612|G6PD1_MOUSE Glucose-6-phosphate 1-dehydrogenase X OS=Mus musculus (Mouse) OX=10090 GN=G6pdx PE=1 SV=3	G6PDX	12.9044	12.6315	12.9291	12.8046	12.9679	13.2458	12.9361	12.9941	12.6528	12.715	12.5795	12.8377
P70699	>sp|P70699|LYAG_MOUSE Lysosomal alpha-glucosidase OS=Mus musculus (Mouse) OX=10090 GN=Gaa PE=1 SV=2	GAA	11.4325	11.2089	11.3556	10.9688	11.1555	11.5101	11.237	11.4503	11.4203	11.6453	11.4109	11.4093
Q9DCD6	>sp|Q9DCD6|GBRAP_MOUSE Gamma-aminobutyric acid receptor-associated protein OS=Mus musculus (Mouse) OX=10090 GN=Gabarap PE=1 SV=2	GABARAP							10.4784	10.3011	10.3435	11.3415		11.0085
P60521	>sp|P60521|GBRL2_MOUSE Gamma-aminobutyric acid receptor-associated protein-like 2 OS=Mus musculus (Mouse) OX=10090 GN=Gabarapl2 PE=1 SV=1	GABARAPL2	10.1283	10.0761	10.8165		10.3147	10.2173
Q00422	>sp|Q00422|GABPA_MOUSE GA-binding protein alpha chain OS=Mus musculus (Mouse) OX=10090 GN=Gabpa PE=1 SV=2	GABPA	10.6461	10.8751	10.3649	10.4348		10.2839	10.5142	10.2606	10.1571	10.8099	10.3957	10.4884
Q99KY4	>sp|Q99KY4|GAK_MOUSE Cyclin-G-associated kinase OS=Mus musculus (Mouse) OX=10090 GN=Gak PE=1 SV=2	GAK	10.9609	11.4106	11.3864	9.99729	10.6135	11.1144	11.3466	11.0926	11.3289	11.1404	10.6044	10.9991
Q6XQH0	>sp|Q6XQH0|G3ST2_MOUSE Galactose-3-O-sulfotransferase 2 OS=Mus musculus (Mouse) OX=10090 GN=Gal3st2 PE=2 SV=1	GAL3ST2	12.4794	11.8959	13.2101	12.834	12.2247	13.0885	12.5676	12.9937	11.8934	12.3001	12.5422	12.4603
Q9R0N0	>sp|Q9R0N0|GALK1_MOUSE Galactokinase OS=Mus musculus (Mouse) OX=10090 GN=Galk1 PE=1 SV=2	GALK1	11.8391	11.911	12.4355	12.2886	11.9924	12.5706	11.7911	12.1354	11.5233	12.388	12.4108	12.241
Q68FH4	>sp|Q68FH4|GALK2_MOUSE N-acetylgalactosamine kinase OS=Mus musculus (Mouse) OX=10090 GN=Galk2 PE=1 SV=1	GALK2	12.1034	12.3743	12.175	12.3513	12.5049	12.8898	12.7772	12.7047	12.3727	12.2083	12.1898	12.5979
Q8K157	>sp|Q8K157|GALM_MOUSE Aldose 1-epimerase OS=Mus musculus (Mouse) OX=10090 GN=Galm PE=1 SV=1	GALM		10.9116	10.6057	11.5835	11.2345	11.4756	11.6916	11.7288	11.209	10.9062	11.1466	11.4819
Q571E4	>sp|Q571E4|GALNS_MOUSE N-acetylgalactosamine-6-sulfatase OS=Mus musculus (Mouse) OX=10090 GN=Galns PE=1 SV=2	GALNS	12.1562	11.7522	11.5331	11.2046	11.6312	10.8441	11.7565	12.1759	11.645	11.7191	11.1675	11.6117
O08912	>sp|O08912|GALT1_MOUSE Polypeptide N-acetylgalactosaminyltransferase 1 OS=Mus musculus (Mouse) OX=10090 GN=Galnt1 PE=1 SV=1	GALNT1	10.633	10.6561	10.3695	9.97678	10.4511	10.6216	10.7879	10.5486	10.6006	10.7999	10.2267	9.7909
Q6P9S7	>sp|Q6P9S7|GLT10_MOUSE Polypeptide N-acetylgalactosaminyltransferase 10 OS=Mus musculus (Mouse) OX=10090 GN=Galnt10 PE=2 SV=1	GALNT10	10.944	10.6737	11.2026	10.7366	11.2528	11.5085	10.008	10.5494	10.773		10.5344	10.5964
Q6PB93	>sp|Q6PB93|GALT2_MOUSE Polypeptide N-acetylgalactosaminyltransferase 2 OS=Mus musculus (Mouse) OX=10090 GN=Galnt2 PE=1 SV=1	GALNT2	11.281	11.2911	11.0335	11.3518	11.2811	11.2682	11.0206	10.6852	10.9123	11.3212	11.2705	11.1233
Q80VA0	>sp|Q80VA0|GALT7_MOUSE N-acetylgalactosaminyltransferase 7 OS=Mus musculus (Mouse) OX=10090 GN=Galnt7 PE=1 SV=2	GALNT7	10.2389	9.77537	10.5223	10.4595	10.5186
O35969	>sp|O35969|GAMT_MOUSE Guanidinoacetate N-methyltransferase OS=Mus musculus (Mouse) OX=10090 GN=Gamt PE=1 SV=1	GAMT	11.6082	11.8904	11.0398	11.4172	11.4316	11.6615	12.0971	12.0124	12.0207	11.5923	12.0279	12.0016
Q8BHN3	>sp|Q8BHN3|GANAB_MOUSE Neutral alpha-glucosidase AB OS=Mus musculus (Mouse) OX=10090 GN=Ganab PE=1 SV=1	GANAB	13.5462	13.6977	13.7598	13.6687	13.9225	13.7811	13.4968	13.3824	13.6392	13.5027	13.6573	13.6364
Q6PAR5	>sp|Q6PAR5|GAPD1_MOUSE GTPase-activating protein and VPS9 domain-containing protein 1 OS=Mus musculus (Mouse) OX=10090 GN=Gapvd1 PE=1 SV=2	GAPVD1	10.6349	10.6282	10.7775	11.0216	10.6738	11.1174	10.3706	10.1577	10.3184	10.3992	10.5763	10.2964
Q9CY66	>sp|Q9CY66|GAR1_MOUSE H/ACA ribonucleoprotein complex subunit 1 OS=Mus musculus (Mouse) OX=10090 GN=Gar1 PE=1 SV=1	GAR1	12.7234	12.7217	12.9012	12.5913	12.8256	12.7775	12.6416	12.7411	12.6666	12.4275	12.3492	12.5386
Q9CZD3	>sp|Q9CZD3|GARS_MOUSE Glycine--tRNA ligase OS=Mus musculus (Mouse) OX=10090 GN=Gars1 PE=1 SV=1	GARS1	12.0595	11.8016	12.1044	12.0203	12.0805	12.327	11.4955	11.7716	11.4419	11.8057	11.8152	11.577
Q64737	>sp|Q64737|PUR2_MOUSE Trifunctional purine biosynthetic protein adenosine-3 OS=Mus musculus (Mouse) OX=10090 GN=Gart PE=1 SV=3	GART	11.3314	11.0047	11.6019	11.6758	11.2679	11.7043	11.1299	11.3362	11.1115	11.5003	11.314	11.2365
P11862	>sp|P11862|GAS2_MOUSE Growth arrest-specific protein 2 OS=Mus musculus (Mouse) OX=10090 GN=Gas2 PE=1 SV=1	GAS2							8.76078	9.88913	9.85557		9.76128	9.96437
Q8CHY6	>sp|Q8CHY6|P66A_MOUSE Transcriptional repressor p66 alpha OS=Mus musculus (Mouse) OX=10090 GN=Gatad2a PE=1 SV=2	GATAD2A	10.2051	10.793	10.3603	10.8796	10.1928	9.97401	10.6592	10.5758	10.4401	10.7847	11.0408	10.2241
Q8VHR5	>sp|Q8VHR5|P66B_MOUSE Transcriptional repressor p66-beta OS=Mus musculus (Mouse) OX=10090 GN=Gatad2b PE=1 SV=1	GATAD2B	9.34621	9.40217	9.99279	9.34514	9.37912	9.77713	9.73748	9.13785	9.42122	9.6385	9.65012	9.36001
Q99JT1	>sp|Q99JT1|GATB_MOUSE Glutamyl-tRNA(Gln) amidotransferase subunit B, mitochondrial OS=Mus musculus (Mouse) OX=10090 GN=Gatb PE=1 SV=1	GATB	10.3175	11.049		10.6229	10.1214	10.6309	10.2139	10.6176	10.2124	10.3706	10.2836	10.824
Q8BFQ8	>sp|Q8BFQ8|GALD1_MOUSE Glutamine amidotransferase-like class 1 domain-containing protein 1 OS=Mus musculus (Mouse) OX=10090 GN=Gatd1 PE=1 SV=1	GATD1	11.4902	11.236	11.6462	11.2232	11.1636	11.3534	11.2615	11.5563	11.3843	11.6868	11.0981	11.503
Q9D172	>sp|Q9D172|GAL3A_MOUSE Glutamine amidotransferase-like class 1 domain-containing protein 3A, mitochondrial OS=Mus musculus (Mouse) OX=10090 GN=Gatd3a PE=1 SV=1	GATD3A	13.6977	13.8265	14.2804	14.2142	14.364	13.8091	13.9752	13.8823	14.2496	14.4472	14.4855	14.3281
P17439	>sp|P17439|GLCM_MOUSE Lysosomal acid glucosylceramidase OS=Mus musculus (Mouse) OX=10090 GN=Gba PE=1 SV=1	GBA	11.1393	10.9231	11.5086	11.0999	11.0638	11.3032	10.8867	10.9509	10.5235	11.5225	11.1364	10.8569
Q9D6Y9	>sp|Q9D6Y9|GLGB_MOUSE 1,4-alpha-glucan-branching enzyme OS=Mus musculus (Mouse) OX=10090 GN=Gbe1 PE=1 SV=1	GBE1	10.762	10.5895	10.9529	11.689	10.5123	10.9708	10.8517	11.1114	10.368	10.7244	10.2575	10.3352
Q6DFZ1	>tr|Q6DFZ1|Q6DFZ1_MOUSE SEC7 domain-containing protein OS=Mus musculus (Mouse) OX=10090 GN=Gbf1 PE=1 SV=1	GBF1	10.4801	10.4684	10.2547	9.48868	10.7817	10.9087	10.5566	10.441	10.4415	9.95498	10.2527	10.3251
Q9Z0E6	>sp|Q9Z0E6|GBP2_MOUSE Guanylate-binding protein 2 OS=Mus musculus (Mouse) OX=10090 GN=Gbp2 PE=1 SV=1	GBP2	13.561	13.773	13.6924	13.1681	13.8494	14.0427	10.2311	10.444	10.3014	10.0416	10.4697	10.1052
Q61107	>sp|Q61107|GBP4_MOUSE Guanylate-binding protein 4 OS=Mus musculus (Mouse) OX=10090 GN=Gbp4 PE=1 SV=1	GBP4	11.3138	11.7427	11.3669	11.0652	11.5828	11.5804
Q8CFB4	>sp|Q8CFB4|GBP5_MOUSE Guanylate-binding protein 5 OS=Mus musculus (Mouse) OX=10090 GN=Gbp5 PE=1 SV=2	GBP5	10.3816	10.6651		10.3111	10.3668	10.0013
A0A0G2JDV3	>tr|A0A0G2JDV3|A0A0G2JDV3_MOUSE GB1/RHD3-type G domain-containing protein OS=Mus musculus (Mouse) OX=10090 GN=Gbp6 PE=1 SV=1	GBP6	11.7789	11.6922	11.2182	11.7894	11.876	10.8947
Q91Z40	>tr|Q91Z40|Q91Z40_MOUSE GB1/RHD3-type G domain-containing protein OS=Mus musculus (Mouse) OX=10090 GN=Gbp7 PE=1 SV=2	GBP7	12.0115	11.856	12.262	11.5112	12.0075	12.3908	11.2855	10.9893	10.6355	10.9746	11.5641	10.909
O88986	>sp|O88986|KBL_MOUSE 2-amino-3-ketobutyrate coenzyme A ligase, mitochondrial OS=Mus musculus (Mouse) OX=10090 GN=Gcat PE=1 SV=2	GCAT	10.3367	10.6034	10.6255	10.9324	10.6012	10.9383	10.6762	10.6057	10.5256	10.991	10.473	10.8394
Q8CHG3	>sp|Q8CHG3|GCC2_MOUSE GRIP and coiled-coil domain-containing protein 2 OS=Mus musculus (Mouse) OX=10090 GN=Gcc2 PE=1 SV=2	GCC2	10.1697	10.5317	10.806	10.6607	10.176	10.5401
Q60759	>sp|Q60759|GCDH_MOUSE Glutaryl-CoA dehydrogenase, mitochondrial OS=Mus musculus (Mouse) OX=10090 GN=Gcdh PE=1 SV=2	GCDH	11.4468	11.9067	11.6044	11.7889	11.6203	11.5654	11.7965	11.6241	11.8997	11.4001	11.6246	11.9063
P97494	>sp|P97494|GSH1_MOUSE Glutamate--cysteine ligase catalytic subunit OS=Mus musculus (Mouse) OX=10090 GN=Gclc PE=1 SV=4	GCLC	10.5705	10.5929	10.5396	9.65549	9.63989	10.6326	10.3971	10.6367	10.6677		10.8744	10.4197
O09172	>sp|O09172|GSH0_MOUSE Glutamate--cysteine ligase regulatory subunit OS=Mus musculus (Mouse) OX=10090 GN=Gclm PE=1 SV=1	GCLM	11.9783	11.987	11.9747	11.312	11.8984	11.9564	11.4833	11.4187	11.7267	11.343	11.5845	11.4792
E9PVA8	>sp|E9PVA8|GCN1_MOUSE eIF-2-alpha kinase activator GCN1 OS=Mus musculus (Mouse) OX=10090 GN=Gcn1 PE=1 SV=1	GCN1	11.1903	11.0666	10.967	11.2541	10.9539	11.2373	11.2323	11.1226	11.0396	11.0925	11.1462	10.9093
Q91WK5	>sp|Q91WK5|GCSH_MOUSE Glycine cleavage system H protein, mitochondrial OS=Mus musculus (Mouse) OX=10090 GN=Gcsh PE=1 SV=2	GCSH	11.52	10.5941	10.585	9.82431	10.7036	9.17334	11.0298	11.3957	11.9457	10.4192	10.5512	11.0252
Q9R111	>sp|Q9R111|GUAD_MOUSE Guanine deaminase OS=Mus musculus (Mouse) OX=10090 GN=Gda PE=1 SV=1	GDA	12.6865	13.2297	12.3047	10.4213	11.3142	11.0742	9.95161	9.94482	9.62923		10.6851	10.7123
Q9JL56	>sp|Q9JL56|GDE1_MOUSE Glycerophosphodiester phosphodiesterase 1 OS=Mus musculus (Mouse) OX=10090 GN=Gde1 PE=1 SV=1	GDE1	11.6199	11.8137	11.7655	11.5323	11.9589	11.9628	11.638	11.8478	11.6951	11.7159	11.8739	11.876
P50396	>sp|P50396|GDIA_MOUSE Rab GDP dissociation inhibitor alpha OS=Mus musculus (Mouse) OX=10090 GN=Gdi1 PE=1 SV=3	GDI1	12.3793	11.9749	12.1367	12.2743	11.7595	12.0526	12.2879	12.3502	12.1797	11.9175	12.0354	12.0816
P50396;Q61598	>sp|P50396|GDIA_MOUSE Rab GDP dissociation inhibitor alpha OS=Mus musculus (Mouse) OX=10090 GN=Gdi1 PE=1 SV=3;>sp|Q61598|GDIB_MOUSE Rab GDP dissociation inhibitor beta OS=Mus musculus (Mouse) OX=10090 GN=Gdi2 PE=1 SV=1	GDI1;GDI2	12.9067	12.6749	13.0109	13.4315	13.2778	13.79	12.706	12.7185	12.4773	13.07	12.9757	12.8642
Q61598	>sp|Q61598|GDIB_MOUSE Rab GDP dissociation inhibitor beta OS=Mus musculus (Mouse) OX=10090 GN=Gdi2 PE=1 SV=1	GDI2	12.7014	12.4055	12.3362	12.2688	12.1901	12.529	12.4035	12.6317	12.2098	12.0606	11.953	12.1947
Q9CRY7	>sp|Q9CRY7|GDPD1_MOUSE Lysophospholipase D GDPD1 OS=Mus musculus (Mouse) OX=10090 GN=Gdpd1 PE=1 SV=1	GDPD1	9.76507	10.254	10.2919	10.1099	9.76699	10.0874	10.1379	10.3427	9.90401		10.3035	9.94493
Q8BX17	>sp|Q8BX17|GEMI5_MOUSE Gem-associated protein 5 OS=Mus musculus (Mouse) OX=10090 GN=Gemin5 PE=1 SV=2	GEMIN5	12.9567	12.937	13.6523	14.109	13.302	13.6036	13.0062	13.4157	11.9038	13.4727	13.2324	11.9038
Q9D1H7	>sp|Q9D1H7|GET4_MOUSE Golgi to ER traffic protein 4 homolog OS=Mus musculus (Mouse) OX=10090 GN=Get4 PE=1 SV=2	GET4	12.0444	11.69	11.2755	12.0656	12.1353	11.6694	11.6949	11.8267	12.1466	12.3543	11.0699	11.6247
P56213	>sp|P56213|ALR_MOUSE FAD-linked sulfhydryl oxidase ALR OS=Mus musculus (Mouse) OX=10090 GN=Gfer PE=1 SV=2	GFER	11.4705	11.5047	11.384	11.4754	11.7464	11.4954	11.6807	11.4423	11.758	11.2168	11.8553	11.9361
Q8K0D5	>sp|Q8K0D5|EFGM_MOUSE Elongation factor G, mitochondrial OS=Mus musculus (Mouse) OX=10090 GN=Gfm1 PE=1 SV=1	GFM1	12.1694	12.3504	12.3492	12.1282	12.334	11.9122	12.1062	12.0094	12.5797	12.165	12.1509	12.3299
Q8R2Q4	>sp|Q8R2Q4|RRF2M_MOUSE Ribosome-releasing factor 2, mitochondrial OS=Mus musculus (Mouse) OX=10090 GN=Gfm2 PE=1 SV=2	GFM2	11.3326	11.0212	11.0784	11.4169	11.2171	11.1103	11.1406	10.9647	11.675	11.7067	11.5377	11.4597
P47856	>sp|P47856|GFPT1_MOUSE Glutamine--fructose-6-phosphate aminotransferase [isomerizing] 1 OS=Mus musculus (Mouse) OX=10090 GN=Gfpt1 PE=1 SV=3	GFPT1	11.163	10.8264	10.7655	10.6683	10.9097	11.1518	10.8018	10.8311	10.8108	10.9358	10.8648	10.8803
Q8R0H9	>sp|Q8R0H9|GGA1_MOUSE ADP-ribosylation factor-binding protein GGA1 OS=Mus musculus (Mouse) OX=10090 GN=Gga1 PE=1 SV=1	GGA1	11.5794	11.7726	11.4575		10.8488	11.614	11.2766	11.6293	11.1249	11.3217	10.7992	11.2968
Q9QYC7	>sp|Q9QYC7|VKGC_MOUSE Vitamin K-dependent gamma-carboxylase OS=Mus musculus (Mouse) OX=10090 GN=Ggcx PE=1 SV=1	GGCX	11.5161	11.6208	11.6236	11.0256	11.5768	11.5596	11.6852	11.6515	11.6846	10.8234	11.4729	11.5472
Q9Z0L8	>sp|Q9Z0L8|GGH_MOUSE Gamma-glutamyl hydrolase OS=Mus musculus (Mouse) OX=10090 GN=Ggh PE=1 SV=2	GGH							9.72271	10.5488	10.1943	9.91707	9.95699	8.99139
Q9Z2A9	>sp|Q9Z2A9|GGT5_MOUSE Glutathione hydrolase 5 proenzyme OS=Mus musculus (Mouse) OX=10090 GN=Ggt5 PE=1 SV=2	GGT5	10.5959	10.6529	10.0374		9.85065	10.7407
Q99J23	>sp|Q99J23|GHDC_MOUSE GH3 domain-containing protein OS=Mus musculus (Mouse) OX=10090 GN=Ghdc PE=2 SV=2	GHDC							10.6517	10.4524	11.0329	11.6672	11.0508	11.3402
Q91VC9	>sp|Q91VC9|GHITM_MOUSE Growth hormone-inducible transmembrane protein OS=Mus musculus (Mouse) OX=10090 GN=Ghitm PE=1 SV=1	GHITM	12.8953	13.2819	13.0923	13.4479	13.4835	12.8275	12.7197	12.4135	12.8102	12.7757	12.6056	12.794
P51569	>sp|P51569|AGAL_MOUSE Alpha-galactosidase A OS=Mus musculus (Mouse) OX=10090 GN=Gla PE=1 SV=1	GLA	12.4485	12.4259	11.9599	12.2518	12.5143	12.3625	12.424	12.5847	12.532	11.8442	12.1403	12.4256
P23780	>sp|P23780|BGAL_MOUSE Beta-galactosidase OS=Mus musculus (Mouse) OX=10090 GN=Glb1 PE=1 SV=1	GLB1	12.4688	12.3424	12.1608	12.6324	12.4035	12.5303	12.8201	12.7943	12.731	12.65	12.4537	12.7053
Q8VC60	>sp|Q8VC60|GLB1L_MOUSE Beta-galactosidase-1-like protein OS=Mus musculus (Mouse) OX=10090 GN=Glb1l PE=1 SV=1	GLB1L	9.67375	9.2057	10.656	9.87013	10.1187		10.7585	11.1343	10.1757	10.1083	10.9013	9.83629
Q61543	>sp|Q61543|GSLG1_MOUSE Golgi apparatus protein 1 OS=Mus musculus (Mouse) OX=10090 GN=Glg1 PE=1 SV=1	GLG1	12.0152	12.0381	11.9209	12.2793	12.145	12.0888	12.1825	12.2252	11.8585	12.0461	12.0926	11.9784
Q9CYL5	>sp|Q9CYL5|GAPR1_MOUSE Golgi-associated plant pathogenesis-related protein 1 OS=Mus musculus (Mouse) OX=10090 GN=Glipr2 PE=1 SV=3	GLIPR2	9.48768	10.4563	11.1643		10.0264	10.739
Q9CPU0	>sp|Q9CPU0|LGUL_MOUSE Lactoylglutathione lyase OS=Mus musculus (Mouse) OX=10090 GN=Glo1 PE=1 SV=3	GLO1	12.8498	12.3447	12.9809	12.8778	12.8257	13.1275	13.0282	13.1339	12.7334	12.9134	12.8442	12.9299
Q9CPV4	>sp|Q9CPV4|GLOD4_MOUSE Glyoxalase domain-containing protein 4 OS=Mus musculus (Mouse) OX=10090 GN=Glod4 PE=1 SV=1	GLOD4	12.1733	12.4075	12.5592	12.4532	12.4963	12.1567	12.4323	12.3578	12.6699	12.3191	12.582	12.672
Q9QUH0	>sp|Q9QUH0|GLRX1_MOUSE Glutaredoxin-1 OS=Mus musculus (Mouse) OX=10090 GN=Glrx PE=1 SV=3	GLRX	11.8731	11.8948	11.1479		10.9002	10.9616	11.0345	11.749	11.7825	10.7026	10.8337	10.7102
Q9CQM9	>sp|Q9CQM9|GLRX3_MOUSE Glutaredoxin-3 OS=Mus musculus (Mouse) OX=10090 GN=Glrx3 PE=1 SV=1	GLRX3	11.7635	11.4148	11.9651	12.3487	11.8264	12.034	11.3525	11.663	11.4204	11.7817	11.502	11.617
Q80Y14	>sp|Q80Y14|GLRX5_MOUSE Glutaredoxin-related protein 5, mitochondrial OS=Mus musculus (Mouse) OX=10090 GN=Glrx5 PE=1 SV=2	GLRX5	12.3497	12.4732	12.1159	11.7076	12.2051	11.334	11.7893	12.0767	13.0151	12.4625	12.4897	12.3678
D3Z7P3	>sp|D3Z7P3|GLSK_MOUSE Glutaminase kidney isoform, mitochondrial OS=Mus musculus (Mouse) OX=10090 GN=Gls PE=1 SV=1	GLS	12.0575	12.0566	12.1259	11.7646	12.1764	11.9564	11.9057	11.848	11.8019	11.6056	11.4641	11.6371
Q6NSU3	>sp|Q6NSU3|GL8D1_MOUSE Glycosyltransferase 8 domain-containing protein 1 OS=Mus musculus (Mouse) OX=10090 GN=Glt8d1 PE=1 SV=1	GLT8D1	10.5947	11.0778	11.5414		11.261	10.8063
P26443	>sp|P26443|DHE3_MOUSE Glutamate dehydrogenase 1, mitochondrial OS=Mus musculus (Mouse) OX=10090 GN=Glud1 PE=1 SV=1	GLUD1	13.8541	13.9739	14.0195	14.1532	14.0486	13.8633	13.8516	13.8309	14.0147	13.9505	14.0639	14.0097
P15105	>sp|P15105|GLNA_MOUSE Glutamine synthetase OS=Mus musculus (Mouse) OX=10090 GN=Glul PE=1 SV=6	GLUL	13.192	12.7833	11.9767	12.3055	12.2421	12.6309	12.6116	12.4636	12.3969	12.1006	12.5845	12.4296
Q922P9	>sp|Q922P9|GLYR1_MOUSE Putative oxidoreductase GLYR1 OS=Mus musculus (Mouse) OX=10090 GN=Glyr1 PE=1 SV=1	GLYR1	10.6695	10.6514	10.7308	10.8708	10.9531	10.6478	10.9487	11.1117	10.6593	11.1902	10.7874	11.0023
A0A1D5RLD8	>tr|A0A1D5RLD8|A0A1D5RLD8_MOUSE Glyceraldehyde-3-phosphate dehydrogenase OS=Mus musculus (Mouse) OX=10090 GN=Gm10358 PE=1 SV=1	GM10358	15.3626	15.206	15.4213	15.3146	15.2725	15.4929	14.9183	15.1142	14.9684	14.8925	14.783	14.9701
A0A1D5RLD8;V9GX06	>tr|A0A1D5RLD8|A0A1D5RLD8_MOUSE Glyceraldehyde-3-phosphate dehydrogenase OS=Mus musculus (Mouse) OX=10090 GN=Gm10358 PE=1 SV=1;>tr|V9GX06|V9GX06_MOUSE Gp_dh_C domain-containing protein OS=Mus musculus (Mouse) OX=10090 GN=Gm11214 PE=1 SV=1	GM10358;GM11214	13.2244	14.0999	14.2514	15.116	14.605	15.2708	13.6544	13.7191	13.8807	14.088	13.9785	14.4119
V9GX06	>tr|V9GX06|V9GX06_MOUSE Gp_dh_C domain-containing protein OS=Mus musculus (Mouse) OX=10090 GN=Gm11214 PE=1 SV=1	GM11214	14.5047	14.6672	14.3908		14.8821	14.9544	14.19	14.2531	14.5286	13.9741		14.437
Q60648	>sp|Q60648|SAP3_MOUSE Ganglioside GM2 activator OS=Mus musculus (Mouse) OX=10090 GN=Gm2a PE=1 SV=2	GM2A	13.3075	12.9921	13.1878	13.8415	13.358	13.6565	13.3953	13.7285	13.5463	13.8946	13.6823	13.8033
A0A1W2P7S8	>tr|A0A1W2P7S8|A0A1W2P7S8_MOUSE Predicted gene, 32717 OS=Mus musculus (Mouse) OX=10090 GN=Gm32717 PE=4 SV=1	GM32717							9.63208	9.32925	9.7021	10.2444		9.91319
B1AXN3	>tr|B1AXN3|B1AXN3_MOUSE Predicted gene 382 OS=Mus musculus (Mouse) OX=10090 GN=Gm382 PE=4 SV=1	GM382	11.5513	11.8674	11.9224		12.3805	11.9894	12.3413	11.7929	12.1257		12.541	12.0969
A0A2R8VHP3	>tr|A0A2R8VHP3|A0A2R8VHP3_MOUSE IF rod domain-containing protein OS=Mus musculus (Mouse) OX=10090 GN=Gm5478 PE=1 SV=1	GM5478	12.0036	11.513	12.5964	12.7788	10.7932	11.8437	12.4714	12.1951	10.7782	12.088	11.0185	11.9026
Q9CQI3	>sp|Q9CQI3|GMFB_MOUSE Glia maturation factor beta OS=Mus musculus (Mouse) OX=10090 GN=Gmfb PE=1 SV=3	GMFB	12.1546	11.7538	12.206	12.0654	12.1028	12.4034	12.0298	12.0419	11.919	11.7896	12.2229	12.1206
Q922H4	>sp|Q922H4|GMPPA_MOUSE Mannose-1-phosphate guanyltransferase alpha OS=Mus musculus (Mouse) OX=10090 GN=Gmppa PE=1 SV=1	GMPPA	10.7348	10.6362	10.354	10.9486	11.0918	11.175	10.5267	10.5861	10.2288	10.602	11.1621	10.2226
Q8BTZ7	>sp|Q8BTZ7|GMPPB_MOUSE Mannose-1-phosphate guanyltransferase beta OS=Mus musculus (Mouse) OX=10090 GN=Gmppb PE=1 SV=1	GMPPB	11.1057	10.9318	10.9349	11.1428	11.0771	10.972	10.7467	11.2655	11.0349	10.6707	10.7462	10.8075
Q3THK7	>sp|Q3THK7|GUAA_MOUSE GMP synthase [glutamine-hydrolyzing] OS=Mus musculus (Mouse) OX=10090 GN=Gmps PE=1 SV=2	GMPS	11.9114	11.273	11.8681	11.99	11.7033	12.4072	11.8444	12.1658	11.7187	11.9926	11.8257	11.8038
P21278	>sp|P21278|GNA11_MOUSE Guanine nucleotide-binding protein subunit alpha-11 OS=Mus musculus (Mouse) OX=10090 GN=Gna11 PE=1 SV=1	GNA11	12.7329	12.3862	12.2296	12.4877	12.6479	12.6118	12.0254	11.985	12.0764	11.9826	12.1554	11.9457
P21278;P30677	>sp|P21278|GNA11_MOUSE Guanine nucleotide-binding protein subunit alpha-11 OS=Mus musculus (Mouse) OX=10090 GN=Gna11 PE=1 SV=1;>sp|P30677|GNA14_MOUSE Guanine nucleotide-binding protein subunit alpha-14 OS=Mus musculus (Mouse) OX=10090 GN=Gna14 PE=1 SV=2	GNA11;GNA14		9.34314	9.89674	9.71435	9.56508	9.9163
P21278;P21279	>sp|P21278|GNA11_MOUSE Guanine nucleotide-binding protein subunit alpha-11 OS=Mus musculus (Mouse) OX=10090 GN=Gna11 PE=1 SV=1;>sp|P21279|GNAQ_MOUSE Guanine nucleotide-binding protein G(q) subunit alpha OS=Mus musculus (Mouse) OX=10090 GN=Gnaq PE=1 SV=4	GNA11;GNAQ	11.8782	12.5102	12.7907	12.7924	12.0243	12.3712	11.9465	11.6554	11.8973	11.6882	11.6128	11.5503
P21278;P21279;P27601;P30677	>sp|P21278|GNA11_MOUSE Guanine nucleotide-binding protein subunit alpha-11 OS=Mus musculus (Mouse) OX=10090 GN=Gna11 PE=1 SV=1;>sp|P21279|GNAQ_MOUSE Guanine nucleotide-binding protein G(q) subunit alpha OS=Mus musculus (Mouse) OX=10090 GN=Gnaq PE=1 SV=4;>sp|P27601|GNA13_MOUSE Guanine nucleotide-binding protein subunit alpha-13 OS=Mus musculus (Mouse) OX=10090 GN=Gna13 PE=1 SV=1;>sp|P30677|GNA14_M…	GNA11;GNAQ;GNA13;GNA14	11.1861	11.9403	12.033	12.6729	13.079	13.0167	11.7565	10.8071	11.1081		12.0177	11.7413
P21278;P21279;P30677	>sp|P21278|GNA11_MOUSE Guanine nucleotide-binding protein subunit alpha-11 OS=Mus musculus (Mouse) OX=10090 GN=Gna11 PE=1 SV=1;>sp|P21279|GNAQ_MOUSE Guanine nucleotide-binding protein G(q) subunit alpha OS=Mus musculus (Mouse) OX=10090 GN=Gnaq PE=1 SV=4;>sp|P30677|GNA14_MOUSE Guanine nucleotide-binding protein subunit alpha-14 OS=Mus musculus (Mouse) OX=10090 GN=Gna14 PE=1 SV=2	GNA11;GNAQ;GNA14	15.8033	15.8855	16.1069	16.0499	15.7584	15.9986	15.3642	15.2649	15.4022	15.7245	15.5639	15.3885
P27601	>sp|P27601|GNA13_MOUSE Guanine nucleotide-binding protein subunit alpha-13 OS=Mus musculus (Mouse) OX=10090 GN=Gna13 PE=1 SV=1	GNA13	11.8723	12.2049	11.8597	11.4513	12.0069	11.8116	11.4689	11.2554	11.329	10.4985	10.891	11.2011
P30677	>sp|P30677|GNA14_MOUSE Guanine nucleotide-binding protein subunit alpha-14 OS=Mus musculus (Mouse) OX=10090 GN=Gna14 PE=1 SV=2	GNA14	11.9235	11.8719	11.4989	11.792	11.7211	11.6304	11.3049	11.4134	11.1167	11.3991	11.4751	11.3073
B2RSH2;P08752;P18872;Q9DC51	>sp|B2RSH2|GNAI1_MOUSE Guanine nucleotide-binding protein G(i) subunit alpha-1 OS=Mus musculus (Mouse) OX=10090 GN=Gnai1 PE=1 SV=1;>sp|P08752|GNAI2_MOUSE Guanine nucleotide-binding protein G(i) subunit alpha-2 OS=Mus musculus (Mouse) OX=10090 GN=Gnai2 PE=1 SV=5;>sp|P18872|GNAO_MOUSE Guanine nucleotide-binding protein G(o) subunit alpha OS=Mus musculus (Mouse) OX=10090 GN=Gnao1 PE=1 SV=3;>sp|Q9DC5…	GNAI1;GNAI2;GNAO1;GNAI3	13.5875	13.6185	13.1913	13.0209	13.5133	13.3776	13.2479	13.0245	12.7943	13.213	12.3226	12.9635
B2RSH2;P08752;P50149;Q9DC51	>sp|B2RSH2|GNAI1_MOUSE Guanine nucleotide-binding protein G(i) subunit alpha-1 OS=Mus musculus (Mouse) OX=10090 GN=Gnai1 PE=1 SV=1;>sp|P08752|GNAI2_MOUSE Guanine nucleotide-binding protein G(i) subunit alpha-2 OS=Mus musculus (Mouse) OX=10090 GN=Gnai2 PE=1 SV=5;>sp|P50149|GNAT2_MOUSE Guanine nucleotide-binding protein G(t) subunit alpha-2 OS=Mus musculus (Mouse) OX=10090 GN=Gnat2 PE=2 SV=2;>sp|Q9…	GNAI1;GNAI2;GNAT2;GNAI3	13.1419	13.0664	13.434	13.2862	13.6891	13.8759	12.8577	12.5276	12.4569	13.0742	12.7991	12.8425
P08752	>sp|P08752|GNAI2_MOUSE Guanine nucleotide-binding protein G(i) subunit alpha-2 OS=Mus musculus (Mouse) OX=10090 GN=Gnai2 PE=1 SV=5	GNAI2	12.4178	12.7367	12.4264	11.9553	12.1312	11.9551	11.7876	12.086	11.9517	11.6591	11.9566	11.748
P08752;Q9DC51	>sp|P08752|GNAI2_MOUSE Guanine nucleotide-binding protein G(i) subunit alpha-2 OS=Mus musculus (Mouse) OX=10090 GN=Gnai2 PE=1 SV=5;>sp|Q9DC51|GNAI3_MOUSE Guanine nucleotide-binding protein G(i) subunit alpha OS=Mus musculus (Mouse) OX=10090 GN=Gnai3 PE=1 SV=3	GNAI2;GNAI3	11.9007	11.7219	12.6398	11.5781	11.879	12.0551	11.1043	11.8657	11.6067		11.4717	11.6467
P08752;P18872;Q6R0H7;Q9DC51	>sp|P08752|GNAI2_MOUSE Guanine nucleotide-binding protein G(i) subunit alpha-2 OS=Mus musculus (Mouse) OX=10090 GN=Gnai2 PE=1 SV=5;>sp|P18872|GNAO_MOUSE Guanine nucleotide-binding protein G(o) subunit alpha OS=Mus musculus (Mouse) OX=10090 GN=Gnao1 PE=1 SV=3;>sp|Q6R0H7|GNAS1_MOUSE Guanine nucleotide-binding protein G(s) subunit alpha isoforms XLas OS=Mus musculus (Mouse) OX=10090 GN=Gnas PE=1 SV=…	GNAI2;GNAO1;GNAS;GNAI3	16.9995	17.0491	17.1169		17.0801	17.1872	16.3835	16.1529	16.5737	16.7216		16.3831
Q9DC51	>sp|Q9DC51|GNAI3_MOUSE Guanine nucleotide-binding protein G(i) subunit alpha OS=Mus musculus (Mouse) OX=10090 GN=Gnai3 PE=1 SV=3	GNAI3	13.7675	13.7102	13.4429	12.8772	13.5412	13.1418	12.7531	12.7519	12.9461	12.4701	12.2477	12.8203
P18872	>sp|P18872|GNAO_MOUSE Guanine nucleotide-binding protein G(o) subunit alpha OS=Mus musculus (Mouse) OX=10090 GN=Gnao1 PE=1 SV=3	GNAO1	12.0109	11.5496	11.9808	12.1335	11.5436	11.4238	12.6619	11.549	11.1635		10.9946	11.1789
P21279	>sp|P21279|GNAQ_MOUSE Guanine nucleotide-binding protein G(q) subunit alpha OS=Mus musculus (Mouse) OX=10090 GN=Gnaq PE=1 SV=4	GNAQ	12.4837	12.5852	12.4455	12.1686	12.4689	12.429	12.2688	12.1348	12.0701	12.2454	12.1092	12.0539
Q6R0H7	>sp|Q6R0H7|GNAS1_MOUSE Guanine nucleotide-binding protein G(s) subunit alpha isoforms XLas OS=Mus musculus (Mouse) OX=10090 GN=Gnas PE=1 SV=1	GNAS	12.7029	12.7143	12.6472	12.5801	12.721	12.3792	12.0385	11.967	12.3213	11.8549	12.0748	12.2687
P62874	>sp|P62874|GBB1_MOUSE Guanine nucleotide-binding protein G(I)/G(S)/G(T) subunit beta-1 OS=Mus musculus (Mouse) OX=10090 GN=Gnb1 PE=1 SV=3	GNB1	12.1677	12.5581	11.5759	11.7224	12.0347	11.3949	11.8818	11.5869	11.8258	11.0746	10.8691	11.5434
P62874;P62880	>sp|P62874|GBB1_MOUSE Guanine nucleotide-binding protein G(I)/G(S)/G(T) subunit beta-1 OS=Mus musculus (Mouse) OX=10090 GN=Gnb1 PE=1 SV=3;>sp|P62880|GBB2_MOUSE Guanine nucleotide-binding protein G(I)/G(S)/G(T) subunit beta-2 OS=Mus musculus (Mouse) OX=10090 GN=Gnb2 PE=1 SV=3	GNB1;GNB2	14.0503	14.1135	14.2321	14.2433	14.1033	14.3406	13.708	13.4394	13.4782	13.8701	13.8573	13.7421
P62880	>sp|P62880|GBB2_MOUSE Guanine nucleotide-binding protein G(I)/G(S)/G(T) subunit beta-2 OS=Mus musculus (Mouse) OX=10090 GN=Gnb2 PE=1 SV=3	GNB2	12.9183	12.9308	11.4764	12.1924	12.5884	11.8075	12.3587	12.2388	12.266	10.7911	11.1253	12.2082
P29387	>sp|P29387|GBB4_MOUSE Guanine nucleotide-binding protein subunit beta-4 OS=Mus musculus (Mouse) OX=10090 GN=Gnb4 PE=1 SV=4	GNB4	11.463	11.5686	12.2887	11.6214	11.3037	12.1154	11.9196	11.5995	11.1502	10.9663	11.7	11.4098
Q91WG8	>sp|Q91WG8|GLCNE_MOUSE Bifunctional UDP-N-acetylglucosamine 2-epimerase/N-acetylmannosamine kinase OS=Mus musculus (Mouse) OX=10090 GN=Gne PE=1 SV=1	GNE							10.1029	10.4235	9.76615		10.6902	9.40763
P98192	>sp|P98192|GNPAT_MOUSE Dihydroxyacetone phosphate acyltransferase OS=Mus musculus (Mouse) OX=10090 GN=Gnpat PE=1 SV=1	GNPAT	11.2366	11.2673	11.0874	11.3785	11.4771	11.36	11.0634	10.7822	11.3199	10.8681	11.0434	10.7279
O88958	>sp|O88958|GNPI1_MOUSE Glucosamine-6-phosphate isomerase 1 OS=Mus musculus (Mouse) OX=10090 GN=Gnpda1 PE=1 SV=3	GNPDA1	12.0076	11.9094	11.9154	11.9023	11.9706	12.2362	12.3726	12.3656	12.313	12.3879	12.1275	12.4287
O88958;Q9CRC9	>sp|O88958|GNPI1_MOUSE Glucosamine-6-phosphate isomerase 1 OS=Mus musculus (Mouse) OX=10090 GN=Gnpda1 PE=1 SV=3;>sp|Q9CRC9|GNPI2_MOUSE Glucosamine-6-phosphate isomerase 2 OS=Mus musculus (Mouse) OX=10090 GN=Gnpda2 PE=1 SV=1	GNPDA1;GNPDA2	12.0153	11.5138	11.4741	11.3925	11.6737	11.7052	12.0086	12.2278	12.08	11.3892	11.4861	11.7297
Q9CRC9	>sp|Q9CRC9|GNPI2_MOUSE Glucosamine-6-phosphate isomerase 2 OS=Mus musculus (Mouse) OX=10090 GN=Gnpda2 PE=1 SV=1	GNPDA2	11.8412	11.5602	11.2749		11.1856	11.5686	10.8221	11.4064	10.6807	10.2326	11.1941	10.772
Q9JK38	>sp|Q9JK38|GNA1_MOUSE Glucosamine 6-phosphate N-acetyltransferase OS=Mus musculus (Mouse) OX=10090 GN=Gnpnat1 PE=1 SV=1	GNPNAT1	11.014	10.7175	10.7937	11.0181	10.4622	10.748	10.8865	10.8777	10.7876	9.59008	10.5706	10.1782
Q8BFR4	>sp|Q8BFR4|GNS_MOUSE N-acetylglucosamine-6-sulfatase OS=Mus musculus (Mouse) OX=10090 GN=Gns PE=1 SV=1	GNS	12.6052	12.4351	12.5325	12.8552	12.6624	12.5632	11.7974	12.1407	11.9991	12.3165	12.0919	12.33
Q921M4	>sp|Q921M4|GOGA2_MOUSE Golgin subfamily A member 2 OS=Mus musculus (Mouse) OX=10090 GN=Golga2 PE=1 SV=3	GOLGA2	10.4861	10.6162	10.6431	9.91975	10.6124	11.2569	10.7236	10.9717	10.423	11.015	10.6128	10.0839
P55937	>sp|P55937|GOGA3_MOUSE Golgin subfamily A member 3 OS=Mus musculus (Mouse) OX=10090 GN=Golga3 PE=1 SV=3	GOLGA3	9.88818	9.95407	10.1254		10.1814	9.76135	10.445	9.74207	10.0219	10.7455		10.0755
Q91VW5	>sp|Q91VW5|GOGA4_MOUSE Golgin subfamily A member 4 OS=Mus musculus (Mouse) OX=10090 GN=Golga4 PE=1 SV=2	GOLGA4	10.6848	10.3062		9.14746	10.6732	11.0499	10.898	10.0459	10.4291	10.4147	10.568	10.4463
Q9QYE6	>sp|Q9QYE6|GOGA5_MOUSE Golgin subfamily A member 5 OS=Mus musculus (Mouse) OX=10090 GN=Golga5 PE=1 SV=2	GOLGA5	11.3071	11.1489	11.2814	11.0034	11.0577
Q91W53	>sp|Q91W53|GOGA7_MOUSE Golgin subfamily A member 7 OS=Mus musculus (Mouse) OX=10090 GN=Golga7 PE=1 SV=1	GOLGA7	12.2312	11.8856	10.1723		9.86208	9.7074
E9PVZ8	>tr|E9PVZ8|E9PVZ8_MOUSE Golgi autoantigen, golgin subfamily b, macrogolgin 1 OS=Mus musculus (Mouse) OX=10090 GN=Golgb1 PE=1 SV=1	GOLGB1	10.6796	10.4063	10.6948	10.7734	10.4214	10.6676	10.6434	10.5126	10.3397	10.8672	10.8377	10.4101
Q8BXA1	>sp|Q8BXA1|GOLI4_MOUSE Golgi integral membrane protein 4 OS=Mus musculus (Mouse) OX=10090 GN=Golim4 PE=1 SV=1	GOLIM4	10.5306	11.1345	10.4032	10.4449	10.769	9.97784	10.7156	10.7254	10.8031	10.8995		10.2733
Q9CRA5	>sp|Q9CRA5|GOLP3_MOUSE Golgi phosphoprotein 3 OS=Mus musculus (Mouse) OX=10090 GN=Golph3 PE=1 SV=1	GOLPH3	12.5917	12.604	11.507	12.5478	11.3269	10.8217	12.3663	12.5183	12.4328	12.2933	11.8841	12.2769
Q8R088	>sp|Q8R088|GLP3L_MOUSE Golgi phosphoprotein 3-like OS=Mus musculus (Mouse) OX=10090 GN=Golph3l PE=1 SV=1	GOLPH3L	10.9463	10.9489	10.6724	11.4296	10.6126	11.5497	10.9017	10.8787	10.7739		10.5263	11.0233
Q9CR60	>sp|Q9CR60|GOT1B_MOUSE Vesicle transport protein GOT1B OS=Mus musculus (Mouse) OX=10090 GN=Golt1b PE=1 SV=1	GOLT1B	10.2107	10.5788	10.4027	10.1442	10.6338	10.293
Q8BH60	>sp|Q8BH60|GOPC_MOUSE Golgi-associated PDZ and coiled-coil motif-containing protein OS=Mus musculus (Mouse) OX=10090 GN=Gopc PE=1 SV=1	GOPC	11.2729	11.2497		11.8418	11.0889	11.4536	10.9152	11.0878	10.5727	10.5692		10.6299
Q99JX3	>sp|Q99JX3|GORS2_MOUSE Golgi reassembly-stacking protein 2 OS=Mus musculus (Mouse) OX=10090 GN=Gorasp2 PE=1 SV=3	GORASP2							10.7697	10.5337	9.69416		10.8008	10.9178
O88630	>sp|O88630|GOSR1_MOUSE Golgi SNAP receptor complex member 1 OS=Mus musculus (Mouse) OX=10090 GN=Gosr1 PE=1 SV=2	GOSR1							10.1717	9.82242	9.64982	9.97261	10.8827	10.354
O35166	>sp|O35166|GOSR2_MOUSE Golgi SNAP receptor complex member 2 OS=Mus musculus (Mouse) OX=10090 GN=Gosr2 PE=1 SV=2	GOSR2	11.3868	11.5576	10.9507	11.5334	10.8196	11.3082	11.547	11.2169	11.5717	12.1689	11.3833	11.646
P05201	>sp|P05201|AATC_MOUSE Aspartate aminotransferase, cytoplasmic OS=Mus musculus (Mouse) OX=10090 GN=Got1 PE=1 SV=3	GOT1	13.4638	13.2679	13.3293	13.3508	13.1629	13.5506	12.9326	13.0884	12.9896	12.7813	12.9328	12.8348
P05202	>sp|P05202|AATM_MOUSE Aspartate aminotransferase, mitochondrial OS=Mus musculus (Mouse) OX=10090 GN=Got2 PE=1 SV=1	GOT2	14.9485	15.0118	15.4493	15.6721	15.3717	15.3127	15.0786	15.0728	15.2685	15.6562	15.5382	15.3747
Q9WTK3	>sp|Q9WTK3|GPAA1_MOUSE Glycosylphosphatidylinositol anchor attachment 1 protein OS=Mus musculus (Mouse) OX=10090 GN=Gpaa1 PE=1 SV=3	GPAA1	11.9532	12.2253	12.0584	11.7829	12.1014	11.7826	11.9168	11.7117	11.747	11.8465	11.7859	11.9328
Q61586	>sp|Q61586|GPAT1_MOUSE Glycerol-3-phosphate acyltransferase 1, mitochondrial OS=Mus musculus (Mouse) OX=10090 GN=Gpam PE=1 SV=2	GPAM	11.1254	11.4553	11.3703	11.0129	11.2997	10.9016	10.8149	10.608	11.2395	10.6262	10.838	10.92
P13707	>sp|P13707|GPDA_MOUSE Glycerol-3-phosphate dehydrogenase [NAD(+)], cytoplasmic OS=Mus musculus (Mouse) OX=10090 GN=Gpd1 PE=1 SV=3	GPD1	12.0669	12.054	12.0641	12.4198	11.9283	12.036	12.0339	12.4748	12.2918	12.4865	12.0465	12.3202
P13707;Q3ULJ0	>sp|P13707|GPDA_MOUSE Glycerol-3-phosphate dehydrogenase [NAD(+)], cytoplasmic OS=Mus musculus (Mouse) OX=10090 GN=Gpd1 PE=1 SV=3;>sp|Q3ULJ0|GPD1L_MOUSE Glycerol-3-phosphate dehydrogenase 1-like protein OS=Mus musculus (Mouse) OX=10090 GN=Gpd1l PE=1 SV=2	GPD1;GPD1L							10.2861	11.0887	10.2414	10.9413	10.5236	9.29928
Q3ULJ0	>sp|Q3ULJ0|GPD1L_MOUSE Glycerol-3-phosphate dehydrogenase 1-like protein OS=Mus musculus (Mouse) OX=10090 GN=Gpd1l PE=1 SV=2	GPD1L	10.8088	10.6703	11.5119	11.4902	11.0374	11.3335	11.1015	10.8741	11.1494	11.282	11.6426	11.0575
Q64521	>sp|Q64521|GPDM_MOUSE Glycerol-3-phosphate dehydrogenase, mitochondrial OS=Mus musculus (Mouse) OX=10090 GN=Gpd2 PE=1 SV=2	GPD2	12.0261	12.3382	12.3719	12.2518	12.0553	12.0519	12.1095	12.0679	12.2748	12.0589	12.1454	12.1517
Q8BUV3	>sp|Q8BUV3|GEPH_MOUSE Gephyrin OS=Mus musculus (Mouse) OX=10090 GN=Gphn PE=1 SV=2	GPHN	10.7819	11.1537	11.3546	11.336	10.9395	11.4648	10.8486	10.5459	10.202	10.8621	10.4855	10.7733
P06745	>sp|P06745|G6PI_MOUSE Glucose-6-phosphate isomerase OS=Mus musculus (Mouse) OX=10090 GN=Gpi PE=1 SV=4	GPI	12.4794	12.2989	12.4284	12.3511	12.2578	12.686	12.4242	12.5491	12.1304	12.2116	12.2111	12.1909
O70362	>sp|O70362|PHLD_MOUSE Phosphatidylinositol-glycan-specific phospholipase D OS=Mus musculus (Mouse) OX=10090 GN=Gpld1 PE=1 SV=1	GPLD1	11.585	11.4826	11.7143	11.6089	11.2038	11.2329	12.3305	12.4557	11.6544	11.9056	12.2235	11.9335
Q99P91	>sp|Q99P91|GPNMB_MOUSE Transmembrane glycoprotein NMB OS=Mus musculus (Mouse) OX=10090 GN=Gpnmb PE=1 SV=2	GPNMB	11.459	10.4432	10.5178		11.036	10.1614	12.561	12.7099	10.7744	10.6398	9.96734	9.41758
Q91WD0	>sp|Q91WD0|GP108_MOUSE Protein GPR108 OS=Mus musculus (Mouse) OX=10090 GN=Gpr108 PE=1 SV=1	GPR108							10.1263	8.95219	10.2492		9.73447	10.446
Q8BS95	>sp|Q8BS95|GPHR_MOUSE Golgi pH regulator OS=Mus musculus (Mouse) OX=10090 GN=Gpr89a PE=1 SV=2	GPR89A							10.4644	10.0114	10.8084		10.3928	9.86709
Q99LD4	>sp|Q99LD4|CSN1_MOUSE COP9 signalosome complex subunit 1 OS=Mus musculus (Mouse) OX=10090 GN=Gps1 PE=1 SV=1	GPS1	11.7964	11.7498	11.6578	12.2308	11.9355	12.3849	11.7651	12.2475	11.5898	12.1717	11.8084	11.8581
P11352	>sp|P11352|GPX1_MOUSE Glutathione peroxidase 1 OS=Mus musculus (Mouse) OX=10090 GN=Gpx1 PE=1 SV=2	GPX1	13.2467	13.4153	12.9734	12.7588	13.2655	12.7464	13.1989	13.2356	13.4524	12.9848	13.3036	13.4522
O70325	>sp|O70325|GPX4_MOUSE Phospholipid hydroperoxide glutathione peroxidase OS=Mus musculus (Mouse) OX=10090 GN=Gpx4 PE=1 SV=4	GPX4	12.1037	12.1192	12.452	12.5783	12.3713	12.1677	12.0533	11.8721	12.4617	12.6263	12.4285	12.3382
Q99LJ6	>sp|Q99LJ6|GPX7_MOUSE Glutathione peroxidase 7 OS=Mus musculus (Mouse) OX=10090 GN=Gpx7 PE=1 SV=1	GPX7	10.3606	10.7967	10.298	10.5017	10.2673	10.3265	9.98003	9.96306	9.74874	10.3465	10.4425	10.15
Q9D7B7	>sp|Q9D7B7|GPX8_MOUSE Probable glutathione peroxidase 8 OS=Mus musculus (Mouse) OX=10090 GN=Gpx8 PE=1 SV=1	GPX8	11.7787	11.7067	11.8938	11.4207	11.7448	11.7745	11.7682	11.5523	11.4424	11.8946	11.8733	11.3716
Q80TI0	>sp|Q80TI0|ASTRB_MOUSE Protein Aster-B OS=Mus musculus (Mouse) OX=10090 GN=Gramd1b PE=1 SV=2	GRAMD1B	11.7214	11.5452	11.2631	11.6105	11.9107	11.4845	11.1724	11.1341	11.4603	11.2263	11.161	11.5025
Q60631	>sp|Q60631|GRB2_MOUSE Growth factor receptor-bound protein 2 OS=Mus musculus (Mouse) OX=10090 GN=Grb2 PE=1 SV=1	GRB2	11.4907	11.3635	11.6117	11.3622	11.5044	11.6886	11.1824	11.1161	11.1668	11.2119	11.0935	11.0535
Q8K5C0	>sp|Q8K5C0|GRHL2_MOUSE Grainyhead-like protein 2 homolog OS=Mus musculus (Mouse) OX=10090 GN=Grhl2 PE=2 SV=1	GRHL2	11.5006	11.809	10.9593	9.73594		11.0331
Q91Z53	>sp|Q91Z53|GRHPR_MOUSE Glyoxylate reductase/hydroxypyruvate reductase OS=Mus musculus (Mouse) OX=10090 GN=Grhpr PE=1 SV=1	GRHPR	14.1589	14.1275	14.5857	14.5879	14.25	14.5528	14.4259	14.4881	14.2677	14.3424	14.4523	14.2954
Q91ZU9	>sp|Q91ZU9|NMD3B_MOUSE Glutamate receptor ionotropic, NMDA 3B OS=Mus musculus (Mouse) OX=10090 GN=Grin3b PE=1 SV=1	GRIN3B	12.8299	13.4511	12.6311	13.0915	13.0281	12.5015	12.548	12.7983	13.3943	13.1071	13.1298	13.2111
Q99LP6	>sp|Q99LP6|GRPE1_MOUSE GrpE protein homolog 1, mitochondrial OS=Mus musculus (Mouse) OX=10090 GN=Grpel1 PE=1 SV=1	GRPEL1	12.3407	12.3452	12.4764	12.4899	12.8323	12.2347	12.1128	12.0853	12.3224	12.4494	12.2505	12.5487
Q8C5Q4	>sp|Q8C5Q4|GRSF1_MOUSE G-rich sequence factor 1 OS=Mus musculus (Mouse) OX=10090 GN=Grsf1 PE=1 SV=2	GRSF1	11.3351	10.966		10.9422	11.6617	11.1288	10.2493	10.9036	10.9995	10.8244	10.6394	10.9836
Q9D8T2	>sp|Q9D8T2|GSDMD_MOUSE Gasdermin-D OS=Mus musculus (Mouse) OX=10090 GN=Gsdmdc1 PE=1 SV=1	GSDMDC1	11.4008	11.1777	10.6247	10.0998	10.5417	10.305
Q2NL51	>sp|Q2NL51|GSK3A_MOUSE Glycogen synthase kinase-3 alpha OS=Mus musculus (Mouse) OX=10090 GN=Gsk3a PE=1 SV=2	GSK3A	10.2706	10.0286	10.312	10.3387	9.6807	9.9098	10.5677	10.5449	10.2501	9.86223	10.5086	9.99635
Q2NL51;Q9WV60	>sp|Q2NL51|GSK3A_MOUSE Glycogen synthase kinase-3 alpha OS=Mus musculus (Mouse) OX=10090 GN=Gsk3a PE=1 SV=2;>sp|Q9WV60|GSK3B_MOUSE Glycogen synthase kinase-3 beta OS=Mus musculus (Mouse) OX=10090 GN=Gsk3b PE=1 SV=2	GSK3A;GSK3B	12.7753	12.3972	12.4757	11.9378	12.8602	12.3862	12.032	11.6724	12.0437	12.8769	12.1608	12.0251
Q9WV60	>sp|Q9WV60|GSK3B_MOUSE Glycogen synthase kinase-3 beta OS=Mus musculus (Mouse) OX=10090 GN=Gsk3b PE=1 SV=2	GSK3B	10.7787	11.1971	11.7729	11.4124	10.8422	11.202	11.5565	11.0789	11.2077	11.5209	10.9183	11.0236
P13020	>sp|P13020|GELS_MOUSE Gelsolin OS=Mus musculus (Mouse) OX=10090 GN=Gsn PE=1 SV=3	GSN	12.2771	12.2494	12.0366	11.8703	11.6244	11.9021	11.8496	11.8679	11.4429	11.5462	11.2494	11.6437
Q8R050	>sp|Q8R050|ERF3A_MOUSE Eukaryotic peptide chain release factor GTP-binding subunit ERF3A OS=Mus musculus (Mouse) OX=10090 GN=Gspt1 PE=1 SV=2	GSPT1	11.547	11.3852	11.463	11.8236	11.3834	11.5038	11.3613	11.7278	11.1452	11.1574	11.2063	11.0179
P47791	>sp|P47791|GSHR_MOUSE Glutathione reductase, mitochondrial OS=Mus musculus (Mouse) OX=10090 GN=Gsr PE=1 SV=3	GSR	11.6009	11.6461	11.9509	11.8193	11.9094	12.0232	11.5886	11.8083	11.576	11.8772	12.0028	11.9157
P51855	>sp|P51855|GSHB_MOUSE Glutathione synthetase OS=Mus musculus (Mouse) OX=10090 GN=Gss PE=1 SV=1	GSS	11.7687	11.4635	11.6112	11.7617	11.6168	11.7072	11.5989	11.9018	11.539	11.6228	11.4637	11.7015
P24472	>sp|P24472|GSTA4_MOUSE Glutathione S-transferase A4 OS=Mus musculus (Mouse) OX=10090 GN=Gsta4 PE=1 SV=3	GSTA4	12.6829	12.285	12.6582	12.7008	12.4737	12.6832	12.4506	12.6972	12.3068	12.7448	12.4899	12.4213
P24472;P30115	>sp|P24472|GSTA4_MOUSE Glutathione S-transferase A4 OS=Mus musculus (Mouse) OX=10090 GN=Gsta4 PE=1 SV=3;>sp|P30115|GSTA3_MOUSE Glutathione S-transferase A3 OS=Mus musculus (Mouse) OX=10090 GN=Gsta3 PE=1 SV=2	GSTA4;GSTA3	14.295	13.9497	13.6547	14.1087	13.7719	13.98	14.4355	14.6216	13.7933	13.9523	13.8004	14.163
Q9DCM2	>sp|Q9DCM2|GSTK1_MOUSE Glutathione S-transferase kappa 1 OS=Mus musculus (Mouse) OX=10090 GN=Gstk1 PE=1 SV=3	GSTK1	13.3074	13.5926	13.8147	13.7897	13.9874	13.1711	13.8609	13.3931	14.288	13.916	14.1628	14.2951
P10649	>sp|P10649|GSTM1_MOUSE Glutathione S-transferase Mu 1 OS=Mus musculus (Mouse) OX=10090 GN=Gstm1 PE=1 SV=2	GSTM1	13.4799	13.232	13.6068	13.6875	13.523	13.7502	13.832	13.9176	13.6152	13.8935	13.7355	13.8031
P10649;P15626;P48774;Q80W21	>sp|P10649|GSTM1_MOUSE Glutathione S-transferase Mu 1 OS=Mus musculus (Mouse) OX=10090 GN=Gstm1 PE=1 SV=2;>sp|P15626|GSTM2_MOUSE Glutathione S-transferase Mu 2 OS=Mus musculus (Mouse) OX=10090 GN=Gstm2 PE=1 SV=2;>sp|P48774|GSTM5_MOUSE Glutathione S-transferase Mu 5 OS=Mus musculus (Mouse) OX=10090 GN=Gstm5 PE=1 SV=1;>sp|Q80W21|GSTM7_MOUSE Glutathione S-transferase Mu 7 OS=Mus musculus (Mouse) OX=…	GSTM1;GSTM2;GSTM5;GSTM7	17.5436	17.2344	17.7105	17.7622	17.2602	17.7372	17.9715	18.1011	17.3852	17.9728	17.6654	17.7848
P10649;P15626;Q80W21	>sp|P10649|GSTM1_MOUSE Glutathione S-transferase Mu 1 OS=Mus musculus (Mouse) OX=10090 GN=Gstm1 PE=1 SV=2;>sp|P15626|GSTM2_MOUSE Glutathione S-transferase Mu 2 OS=Mus musculus (Mouse) OX=10090 GN=Gstm2 PE=1 SV=2;>sp|Q80W21|GSTM7_MOUSE Glutathione S-transferase Mu 7 OS=Mus musculus (Mouse) OX=10090 GN=Gstm7 PE=1 SV=1	GSTM1;GSTM2;GSTM7	14.7388	14.4795	14.2741	14.3728	14.2244	14.4548	14.8069	14.7303	14.3322	14.6712	14.5322
P10649;P19639	>sp|P10649|GSTM1_MOUSE Glutathione S-transferase Mu 1 OS=Mus musculus (Mouse) OX=10090 GN=Gstm1 PE=1 SV=2;>sp|P19639|GSTM3_MOUSE Glutathione S-transferase Mu 3 OS=Mus musculus (Mouse) OX=10090 GN=Gstm3 PE=1 SV=2	GSTM1;GSTM3	13.4618	12.8879	13.1824	13.8027	13.171	13.5092	13.8009	14.0539	13.3161	13.9601	13.9924	13.6384
P10649;P19639;Q80W21	>sp|P10649|GSTM1_MOUSE Glutathione S-transferase Mu 1 OS=Mus musculus (Mouse) OX=10090 GN=Gstm1 PE=1 SV=2;>sp|P19639|GSTM3_MOUSE Glutathione S-transferase Mu 3 OS=Mus musculus (Mouse) OX=10090 GN=Gstm3 PE=1 SV=2;>sp|Q80W21|GSTM7_MOUSE Glutathione S-transferase Mu 7 OS=Mus musculus (Mouse) OX=10090 GN=Gstm7 PE=1 SV=1	GSTM1;GSTM3;GSTM7	13.7279	13.3948	13.9784	14.1065	14.431	14.409	14.3185	13.9528	13.5213	14.2385	14.3292	14.3113
P15626	>sp|P15626|GSTM2_MOUSE Glutathione S-transferase Mu 2 OS=Mus musculus (Mouse) OX=10090 GN=Gstm2 PE=1 SV=2	GSTM2	13.1318	12.927	13.1255	13.1702	13.1941	13.591	13.4174	13.4376	12.8923	13.3984	13.1558	13.2773
P15626;P19639	>sp|P15626|GSTM2_MOUSE Glutathione S-transferase Mu 2 OS=Mus musculus (Mouse) OX=10090 GN=Gstm2 PE=1 SV=2;>sp|P19639|GSTM3_MOUSE Glutathione S-transferase Mu 3 OS=Mus musculus (Mouse) OX=10090 GN=Gstm3 PE=1 SV=2	GSTM2;GSTM3	12.9337	12.9175	13.8518	14.1326	13.8714	14.3409	13.8351	13.5146	13.1787	13.9065	13.7265	13.7204
P15626;Q80W21	>sp|P15626|GSTM2_MOUSE Glutathione S-transferase Mu 2 OS=Mus musculus (Mouse) OX=10090 GN=Gstm2 PE=1 SV=2;>sp|Q80W21|GSTM7_MOUSE Glutathione S-transferase Mu 7 OS=Mus musculus (Mouse) OX=10090 GN=Gstm7 PE=1 SV=1	GSTM2;GSTM7	14.065	13.8995	12.9117	13.5436	14.1904	14.4122	14.4215	13.4097	14.0564	13.2878	13.7332	14.0656
P19639	>sp|P19639|GSTM3_MOUSE Glutathione S-transferase Mu 3 OS=Mus musculus (Mouse) OX=10090 GN=Gstm3 PE=1 SV=2	GSTM3	14.8903	14.933	14.7332	14.5457	14.515	14.6609	15.0849	15.3473	14.8766	14.9725	14.6015	14.9083
P48774	>sp|P48774|GSTM5_MOUSE Glutathione S-transferase Mu 5 OS=Mus musculus (Mouse) OX=10090 GN=Gstm5 PE=1 SV=1	GSTM5	11.8917	11.6609	11.6543	11.5188	11.5742	11.4221	11.6527	11.7567	11.6831	11.3561	11.3761	11.5059
O35660	>sp|O35660|GSTM6_MOUSE Glutathione S-transferase Mu 6 OS=Mus musculus (Mouse) OX=10090 GN=Gstm6 PE=1 SV=4	GSTM6	12.8814	12.6541	13.0939	12.4814	11.7198	11.9574	13.0397	12.9148	12.7367	11.6729	11.971	11.7681
O35660;P10649;P15626;P19639;Q80W21	>sp|O35660|GSTM6_MOUSE Glutathione S-transferase Mu 6 OS=Mus musculus (Mouse) OX=10090 GN=Gstm6 PE=1 SV=4;>sp|P10649|GSTM1_MOUSE Glutathione S-transferase Mu 1 OS=Mus musculus (Mouse) OX=10090 GN=Gstm1 PE=1 SV=2;>sp|P15626|GSTM2_MOUSE Glutathione S-transferase Mu 2 OS=Mus musculus (Mouse) OX=10090 GN=Gstm2 PE=1 SV=2;>sp|P19639|GSTM3_MOUSE Glutathione S-transferase Mu 3 OS=Mus musculus (Mouse) OX=…	GSTM6;GSTM1;GSTM2;GSTM3;GSTM7	17.1844	16.7118	17.5819	17.7244	17.225	17.7051	17.4844	17.6294	17.3509	17.9074	17.6695	17.6786
Q80W21	>sp|Q80W21|GSTM7_MOUSE Glutathione S-transferase Mu 7 OS=Mus musculus (Mouse) OX=10090 GN=Gstm7 PE=1 SV=1	GSTM7	9.82302	10.3285	10.1137	10.2707	9.73926	10.0803	10.2625	10.6039	10.6629	10.158	10.575	10.5376
O09131	>sp|O09131|GSTO1_MOUSE Glutathione S-transferase omega-1 OS=Mus musculus (Mouse) OX=10090 GN=Gsto1 PE=1 SV=2	GSTO1	12.0785	11.9015	12.208	12.1673	12.147	12.0109	12.4034	12.4044	12.0829	12.5092	12.526	12.4056
P19157	>sp|P19157|GSTP1_MOUSE Glutathione S-transferase P 1 OS=Mus musculus (Mouse) OX=10090 GN=Gstp1 PE=1 SV=2	GSTP1	12.7501	12.7005	12.2716	11.9705	12.4541	12.2218	12.5288	12.5493	12.5333	11.9549	12.0369	12.3018
Q64471	>sp|Q64471|GSTT1_MOUSE Glutathione S-transferase theta-1 OS=Mus musculus (Mouse) OX=10090 GN=Gstt1 PE=1 SV=4	GSTT1	10.533	10.582	11.3325	11.7564	11.324	11.4058	11.2421	11.4392	11.1062	11.5851	11.369	11.1921
Q61133	>sp|Q61133|GSTT2_MOUSE Glutathione S-transferase theta-2 OS=Mus musculus (Mouse) OX=10090 GN=Gstt2 PE=1 SV=4	GSTT2	12.408	12.3577	12.386	11.9928	12.2728	11.8678	12.5545	12.9236	12.557	12.3972	12.7195	12.5422
Q61133;Q99L20	>sp|Q61133|GSTT2_MOUSE Glutathione S-transferase theta-2 OS=Mus musculus (Mouse) OX=10090 GN=Gstt2 PE=1 SV=4;>sp|Q99L20|GSTT3_MOUSE Glutathione S-transferase theta-3 OS=Mus musculus (Mouse) OX=10090 GN=Gstt3 PE=1 SV=1	GSTT2;GSTT3	11.3298		12.3605	11.5312	11.0141	11.5682		10.8331	10.4886	11.85	11.8548	11.4532
Q99L20	>sp|Q99L20|GSTT3_MOUSE Glutathione S-transferase theta-3 OS=Mus musculus (Mouse) OX=10090 GN=Gstt3 PE=1 SV=1	GSTT3	11.7294	11.2193	11.0108	10.3404	10.8569	10.0084	10.9309	11.552	11.0286		10.9189	10.8963
Q9WVL0	>sp|Q9WVL0|MAAI_MOUSE Maleylacetoacetate isomerase OS=Mus musculus (Mouse) OX=10090 GN=Gstz1 PE=1 SV=1	GSTZ1	11.787	12.0123	12.1513	11.933	12.0441	11.7183	12.0718	11.9188	12.3545	11.7774	12.1245	12.1809
Q99PM3	>sp|Q99PM3|TF2AA_MOUSE Transcription initiation factor IIA subunit 1 OS=Mus musculus (Mouse) OX=10090 GN=Gtf2a1 PE=1 SV=2	GTF2A1							9.71187	10.922	10.2461		10.0375	9.37726
P62915	>sp|P62915|TF2B_MOUSE Transcription initiation factor IIB OS=Mus musculus (Mouse) OX=10090 GN=Gtf2b PE=1 SV=1	GTF2B							11.2708	11.0959	11.4846	11.0866	11.7888	11.2201
Q3THK3	>sp|Q3THK3|T2FA_MOUSE General transcription factor IIF subunit 1 OS=Mus musculus (Mouse) OX=10090 GN=Gtf2f1 PE=1 SV=2	GTF2F1	9.95706	9.22667	10.3773		10.3347	10.5233	10.1467	10.2772	9.91425	10.2047	9.99323	9.30289
Q8R0A0	>sp|Q8R0A0|T2FB_MOUSE General transcription factor IIF subunit 2 OS=Mus musculus (Mouse) OX=10090 GN=Gtf2f2 PE=1 SV=1	GTF2F2							10.6565	11.4541	11.0323	11.8767		11.0446
Q9ESZ8	>sp|Q9ESZ8|GTF2I_MOUSE General transcription factor II-I OS=Mus musculus (Mouse) OX=10090 GN=Gtf2i PE=1 SV=3	GTF2I	11.5698	11.57	11.7809	11.7531	11.405	11.7494	11.8282	11.949	11.5944	11.677	11.619	11.5795
Q8K284	>sp|Q8K284|TF3C1_MOUSE General transcription factor 3C polypeptide 1 OS=Mus musculus (Mouse) OX=10090 GN=Gtf3c1 PE=1 SV=2	GTF3C1	10.6231	10.4314	10.524	10.9008	10.464		10.4552	10.7291	10.2477	10.7021	10.3529	10.12
Q3TMP1	>tr|Q3TMP1|Q3TMP1_MOUSE General transcription factor IIIC, polypeptide 3 OS=Mus musculus (Mouse) OX=10090 GN=Gtf3c3 PE=1 SV=1	GTF3C3							10.7375	11.0054	10.7001		11.0552	11.2578
Q8BMQ2	>sp|Q8BMQ2|TF3C4_MOUSE General transcription factor 3C polypeptide 4 OS=Mus musculus (Mouse) OX=10090 GN=Gtf3c4 PE=1 SV=2	GTF3C4	11.1704	10.9704	11.5092		11.123	10.2406	11.1827	11.4436	11.0709	11.247	10.9931	10.1565
Q8R2T8	>sp|Q8R2T8|TF3C5_MOUSE General transcription factor 3C polypeptide 5 OS=Mus musculus (Mouse) OX=10090 GN=Gtf3c5 PE=2 SV=2	GTF3C5	9.97506	10.5314	10.8833		10.5346	10.8945	10.4529	10.4383	10.4287		10.4414	10.5348
O08582	>sp|O08582|GTPB1_MOUSE GTP-binding protein 1 OS=Mus musculus (Mouse) OX=10090 GN=Gtpbp1 PE=1 SV=2	GTPBP1	9.41843	10.3104	11.0053	10.8604	10.3753	9.71864	9.69903	10.246	10.1447		10.1878	10.3738
Q923K4	>sp|Q923K4|GTPB3_MOUSE tRNA modification GTPase GTPBP3, mitochondrial OS=Mus musculus (Mouse) OX=10090 GN=Gtpbp3 PE=2 SV=1	GTPBP3							9.88243	9.98241	9.71984		10.3327	10.1573
Q99ME9	>sp|Q99ME9|NOG1_MOUSE Nucleolar GTP-binding protein 1 OS=Mus musculus (Mouse) OX=10090 GN=Gtpbp4 PE=1 SV=3	GTPBP4	11.6157	11.3325	11.3161	11.5394	11.9525	11.7954	10.816	11.0674	11.1856	11.5513	11.4884	11.0272
Q9CY28	>sp|Q9CY28|GTPB8_MOUSE GTP-binding protein 8 OS=Mus musculus (Mouse) OX=10090 GN=Gtpbp8 PE=2 SV=1	GTPBP8							11.1283	11.5252	11.5074	11.7323	11.5743	11.485
Q8C3X4	>sp|Q8C3X4|GUF1_MOUSE Translation factor Guf1, mitochondrial OS=Mus musculus (Mouse) OX=10090 GN=Guf1 PE=1 SV=1	GUF1	10.7588	10.8795	10.431		10.5581	10.5395	10.4247	10.4748	10.6034	10.6336	10.7701	10.6112
Q64520	>sp|Q64520|KGUA_MOUSE Guanylate kinase OS=Mus musculus (Mouse) OX=10090 GN=Guk1 PE=1 SV=2	GUK1	9.52173	9.26614		9.7197	9.76812	9.97126
P12265	>sp|P12265|BGLR_MOUSE Beta-glucuronidase OS=Mus musculus (Mouse) OX=10090 GN=Gusb PE=1 SV=2	GUSB	11.4576	11.6559	11.6901	11.7954	11.761	11.6258	11.6329	11.8073	11.7022	11.6816	11.7825	11.6104
Q3UHH8	>sp|Q3UHH8|GXLT1_MOUSE Glucoside xylosyltransferase 1 OS=Mus musculus (Mouse) OX=10090 GN=Gxylt1 PE=1 SV=2	GXYLT1	9.62231	9.87785	10.6005	9.62377	10.003	10.0651
Q9R062	>sp|Q9R062|GLYG_MOUSE Glycogenin-1 OS=Mus musculus (Mouse) OX=10090 GN=Gyg1 PE=1 SV=3	GYG1	11.6629	10.905	11.4265	11.6601	11.5304	12.0321	11.3467	11.6993	11.4118	11.9017	11.7418	11.6315
P10922	>sp|P10922|H10_MOUSE Histone H1.0 OS=Mus musculus (Mouse) OX=10090 GN=H1-0 PE=2 SV=4	H1-0	14.8701	14.0209	15.5867	15.1839	15.2936	15.3977	14.0348	14.5055	15.2035	15.7042	15.2183	15.0949
P43275	>sp|P43275|H11_MOUSE Histone H1.1 OS=Mus musculus (Mouse) OX=10090 GN=H1-1 PE=1 SV=2	H1-1	10.486	10.6636	10.5978	9.54294	10.6366	11.2645	9.56984	10.1023	10.5253	11.2262	10.447	10.4969
P15864	>sp|P15864|H12_MOUSE Histone H1.2 OS=Mus musculus (Mouse) OX=10090 GN=H1-2 PE=1 SV=2	H1-2	12.7637	11.7985	13.0675	12.8856	12.9832	12.652	12.1171	12.6059	12.3875	12.9238	12.8691	12.2661
P15864;P43277	>sp|P15864|H12_MOUSE Histone H1.2 OS=Mus musculus (Mouse) OX=10090 GN=H1-2 PE=1 SV=2;>sp|P43277|H13_MOUSE Histone H1.3 OS=Mus musculus (Mouse) OX=10090 GN=H1-3 PE=1 SV=2	H1-2;H1-3	15.9701	15.3966	16.817	16.5624	16.7889	16.7149	15.0741	15.6583	16.0019	16.9319	16.5838	16.1049
P15864;P43274;P43275;P43277	>sp|P15864|H12_MOUSE Histone H1.2 OS=Mus musculus (Mouse) OX=10090 GN=H1-2 PE=1 SV=2;>sp|P43274|H14_MOUSE Histone H1.4 OS=Mus musculus (Mouse) OX=10090 GN=H1-4 PE=1 SV=2;>sp|P43275|H11_MOUSE Histone H1.1 OS=Mus musculus (Mouse) OX=10090 GN=H1-1 PE=1 SV=2;>sp|P43277|H13_MOUSE Histone H1.3 OS=Mus musculus (Mouse) OX=10090 GN=H1-3 PE=1 SV=2	H1-2;H1-4;H1-1;H1-3	16.1796	15.0933	17.1969	16.9815	17.1601	17.1967	14.9412	15.8498	16.4539	17.3561	16.8942	16.6357
P15864;P43274;P43277	>sp|P15864|H12_MOUSE Histone H1.2 OS=Mus musculus (Mouse) OX=10090 GN=H1-2 PE=1 SV=2;>sp|P43274|H14_MOUSE Histone H1.4 OS=Mus musculus (Mouse) OX=10090 GN=H1-4 PE=1 SV=2;>sp|P43277|H13_MOUSE Histone H1.3 OS=Mus musculus (Mouse) OX=10090 GN=H1-3 PE=1 SV=2	H1-2;H1-4;H1-3	13.4842	13.4928	13.6412	13.7613	14.1395	14.3284	13.4284	13.3785	13.647	14.2294	13.7435	13.6353
P43277	>sp|P43277|H13_MOUSE Histone H1.3 OS=Mus musculus (Mouse) OX=10090 GN=H1-3 PE=1 SV=2	H1-3	15.2529	15.1352	15.604	15.4413	15.6918	15.7062	14.7852	14.5427	15.3555	15.5903	15.2676	15.293
P43274	>sp|P43274|H14_MOUSE Histone H1.4 OS=Mus musculus (Mouse) OX=10090 GN=H1-4 PE=1 SV=2	H1-4	13.6165	13.362	14.0004	14.1294	14.2317	14.5731	12.849	12.9565	13.8806	14.2699	14.0535	14.0196
P43276	>sp|P43276|H15_MOUSE Histone H1.5 OS=Mus musculus (Mouse) OX=10090 GN=H1-5 PE=1 SV=2	H1-5	14.4027	13.5123	14.8153	14.2685	14.4983	14.6826	13.3694	13.8393	14.1015	14.55	14.2588	14.1737
P01901	>sp|P01901|HA1B_MOUSE H-2 class I histocompatibility antigen, K-B alpha chain OS=Mus musculus (Mouse) OX=10090 GN=H2-K1 PE=1 SV=1	H2-K1	13.139	14.0001	13.6035	13.1483	13.721	13.3919	10.8157	10.8745	11.1458	10.5228	11.601	10.9631
P01896;P01897	>sp|P01896|HA1Z_MOUSE H-2 class I histocompatibility antigen, alpha chain OS=Mus musculus (Mouse) OX=10090 GN=- PE=2 SV=1;>sp|P01897|HA1L_MOUSE H-2 class I histocompatibility antigen, L-D alpha chain OS=Mus musculus (Mouse) OX=10090 GN=H2-L PE=1 SV=2	H2-L	13.1397	13.6354	13.3727	13.3045	13.2662	13.1694	10.6338	10.9166	11.0786	10.1912	11.3586	10.7186
P01897	>sp|P01897|HA1L_MOUSE H-2 class I histocompatibility antigen, L-D alpha chain OS=Mus musculus (Mouse) OX=10090 GN=H2-L PE=1 SV=2	H2-L	13.5322	13.7086	13.3544	13.4555	13.5181	13.6652	11.3812	11.6886	11.8177	11.6826	11.7654	12.1306
P01897;P01901	>sp|P01897|HA1L_MOUSE H-2 class I histocompatibility antigen, L-D alpha chain OS=Mus musculus (Mouse) OX=10090 GN=H2-L PE=1 SV=2;>sp|P01901|HA1B_MOUSE H-2 class I histocompatibility antigen, K-B alpha chain OS=Mus musculus (Mouse) OX=10090 GN=H2-K1 PE=1 SV=1	H2-L;H2-K1	14.275	14.9006	14.8057	13.2275	14.8938	14.8141	11.8453	11.0421	11.7143		11.3192	11.5887
P01896;P01897;P01898;P01901	>sp|P01896|HA1Z_MOUSE H-2 class I histocompatibility antigen, alpha chain OS=Mus musculus (Mouse) OX=10090 GN=- PE=2 SV=1;>sp|P01897|HA1L_MOUSE H-2 class I histocompatibility antigen, L-D alpha chain OS=Mus musculus (Mouse) OX=10090 GN=H2-L PE=1 SV=2;>sp|P01898|HA10_MOUSE H-2 class I histocompatibility antigen, Q10 alpha chain OS=Mus musculus (Mouse) OX=10090 GN=H2-Q10 PE=1 SV=3;>sp|P01901|HA1B_M…	H2-L;H2-Q10;H2-K1	11.6341	12.951	11.4169	11.902	14.1509	13.9574	9.79315	9.12208	9.77816		10.5307	9.90626
P01898	>sp|P01898|HA10_MOUSE H-2 class I histocompatibility antigen, Q10 alpha chain OS=Mus musculus (Mouse) OX=10090 GN=H2-Q10 PE=1 SV=3	H2-Q10	11.9408	11.8642	11.7021	11.6682	11.7119	11.6895		11.6715	11.1992	11.6879	11.8824	11.0638
P14430	>sp|P14430|HA18_MOUSE H-2 class I histocompatibility antigen, Q8 alpha chain OS=Mus musculus (Mouse) OX=10090 GN=H2-Q8 PE=3 SV=1	H2-Q8	14.7517	15.34	14.9981	14.5373	15.0819	14.8559	12.0937	11.8781	12.4636	11.8716	12.4676	12.2991
C0HKE1;C0HKE2;C0HKE3;C0HKE4;C0HKE5;C0HKE6;C0HKE7;C0HKE8;C0HKE9;P0C0S6;Q3THW5;Q64523;Q6GSS7;Q8BFU2;Q8CGP5;Q8CGP6;Q8CGP7;Q8R1M2	>sp|C0HKE1|H2A1B_MOUSE Histone H2A type 1-B OS=Mus musculus (Mouse) OX=10090 GN=H2ac4 PE=1 SV=1;>sp|C0HKE2|H2A1C_MOUSE Histone H2A type 1-C OS=Mus musculus (Mouse) OX=10090 GN=Hist1h2ac PE=1 SV=1;>sp|C0HKE3|H2A1D_MOUSE Histone H2A type 1-D OS=Mus musculus (Mouse) OX=10090 GN=H2ac7 PE=1 SV=1;>sp|C0HKE4|H2A1E_MOUSE Histone H2A type 1-E OS=Mus musculus (Mouse) OX=10090 GN=H2ac8 PE=1 SV=1;>sp|C0HKE5|…	H2AC4;HIST1H2AC;H2AC7;H2AC8;H2AC11;H2AC13;HIST1H2AN;HIST1H2AO;HIST1H2AP;H2AZ1;H2AFV;HIST2H2AC;HIST2H2AA1;HIST3H2A;HIST1H2AF;HIST1H2AH;H2AC15;H2AFJ	20.6273	20.5307	21.4802	20.9985	21.1584	20.8831	20.4975	20.44	20.5693	21.7345	21.5474	20.8599
C0HKE1;C0HKE2;C0HKE3;C0HKE4;C0HKE5;C0HKE6;C0HKE7;C0HKE8;C0HKE9;Q64523;Q6GSS7;Q8BFU2;Q8CGP5;Q8CGP6;Q8CGP7;Q8R1M2	>sp|C0HKE1|H2A1B_MOUSE Histone H2A type 1-B OS=Mus musculus (Mouse) OX=10090 GN=H2ac4 PE=1 SV=1;>sp|C0HKE2|H2A1C_MOUSE Histone H2A type 1-C OS=Mus musculus (Mouse) OX=10090 GN=Hist1h2ac PE=1 SV=1;>sp|C0HKE3|H2A1D_MOUSE Histone H2A type 1-D OS=Mus musculus (Mouse) OX=10090 GN=H2ac7 PE=1 SV=1;>sp|C0HKE4|H2A1E_MOUSE Histone H2A type 1-E OS=Mus musculus (Mouse) OX=10090 GN=H2ac8 PE=1 SV=1;>sp|C0HKE5|…	H2AC4;HIST1H2AC;H2AC7;H2AC8;H2AC11;H2AC13;HIST1H2AN;HIST1H2AO;HIST1H2AP;HIST2H2AC;HIST2H2AA1;HIST3H2A;HIST1H2AF;HIST1H2AH;H2AC15;H2AFJ	13.7203	12.9879	13.5045	13.4142	13.7444	13.2302	12.8483	14.3064	12.7042	13.8367	14.2093	12.8659
C0HKE1;C0HKE2;C0HKE3;C0HKE4;C0HKE5;C0HKE6;C0HKE7;C0HKE8;C0HKE9;Q8BFU2;Q8CGP5;Q8CGP6;Q8CGP7;Q8R1M2	>sp|C0HKE1|H2A1B_MOUSE Histone H2A type 1-B OS=Mus musculus (Mouse) OX=10090 GN=H2ac4 PE=1 SV=1;>sp|C0HKE2|H2A1C_MOUSE Histone H2A type 1-C OS=Mus musculus (Mouse) OX=10090 GN=Hist1h2ac PE=1 SV=1;>sp|C0HKE3|H2A1D_MOUSE Histone H2A type 1-D OS=Mus musculus (Mouse) OX=10090 GN=H2ac7 PE=1 SV=1;>sp|C0HKE4|H2A1E_MOUSE Histone H2A type 1-E OS=Mus musculus (Mouse) OX=10090 GN=H2ac8 PE=1 SV=1;>sp|C0HKE5|…	H2AC4;HIST1H2AC;H2AC7;H2AC8;H2AC11;H2AC13;HIST1H2AN;HIST1H2AO;HIST1H2AP;HIST3H2A;HIST1H2AF;HIST1H2AH;H2AC15;H2AFJ							10.7031	10.6544	10.3796	10.9789	11.2389	10.8104
Q9QZQ8	>sp|Q9QZQ8|H2AY_MOUSE Core histone macro-H2A.1 OS=Mus musculus (Mouse) OX=10090 GN=H2afy PE=1 SV=3	H2AFY	13.9878	13.9331	14.2679	13.7698	14.0797	13.9924	13.7741	13.888	13.7344	13.8393	13.829	13.7308
Q8CCK0	>sp|Q8CCK0|H2AW_MOUSE Core histone macro-H2A.2 OS=Mus musculus (Mouse) OX=10090 GN=H2afy2 PE=1 SV=3	H2AFY2	12.4348	12.5431	12.9169	12.2842	12.2885	12.4109	12.3159	12.6282	12.1258	12.2045	12.4033	12.0679
Q8CCK0;Q9QZQ8	>sp|Q8CCK0|H2AW_MOUSE Core histone macro-H2A.2 OS=Mus musculus (Mouse) OX=10090 GN=H2afy2 PE=1 SV=3;>sp|Q9QZQ8|H2AY_MOUSE Core histone macro-H2A.1 OS=Mus musculus (Mouse) OX=10090 GN=H2afy PE=1 SV=3	H2AFY2;H2AFY	15.8121	15.5075	15.6971	13.8596	15.2831	14.1285	15.3826	15.6471	15.1745	14.1768	14.32	14.5633
P0C0S6;Q3THW5	>sp|P0C0S6|H2AZ_MOUSE Histone H2A.Z OS=Mus musculus (Mouse) OX=10090 GN=H2az1 PE=1 SV=2;>sp|Q3THW5|H2AV_MOUSE Histone H2A.V OS=Mus musculus (Mouse) OX=10090 GN=H2afv PE=1 SV=3	H2AZ1;H2AFV	15.9169	16.0167	16.5646	15.9516	16.1751	15.8454	15.3724	15.4198	15.8259	16.5961	16.2779	15.7466
P10853;P10854;Q64475;Q64478;Q64525;Q6ZWY9;Q8CGP1;Q8CGP2	>sp|P10853|H2B1F_MOUSE Histone H2B type 1-F/J/L OS=Mus musculus (Mouse) OX=10090 GN=H2bc13 PE=1 SV=2;>sp|P10854|H2B1M_MOUSE Histone H2B type 1-M OS=Mus musculus (Mouse) OX=10090 GN=H2bc14 PE=1 SV=2;>sp|Q64475|H2B1B_MOUSE Histone H2B type 1-B OS=Mus musculus (Mouse) OX=10090 GN=Hist1h2bb PE=1 SV=3;>sp|Q64478|H2B1H_MOUSE Histone H2B type 1-H OS=Mus musculus (Mouse) OX=10090 GN=Hist1h2bh PE=1 SV=3;>…	H2BC13;H2BC14;HIST1H2BB;HIST1H2BH;HIST2H2BB;H2BC8;H2BC12;HIST1H2BP	17.7509	17.6039	18.4174	18.2626	18.1546	17.9642	17.3734	17.4569	17.5404	18.6517	18.2994	17.6182
P10853;P10854;Q64475;Q64478;Q64524;Q64525;Q6ZWY9;Q8CGP0;Q8CGP1;Q8CGP2;Q9D2U9	>sp|P10853|H2B1F_MOUSE Histone H2B type 1-F/J/L OS=Mus musculus (Mouse) OX=10090 GN=H2bc13 PE=1 SV=2;>sp|P10854|H2B1M_MOUSE Histone H2B type 1-M OS=Mus musculus (Mouse) OX=10090 GN=H2bc14 PE=1 SV=2;>sp|Q64475|H2B1B_MOUSE Histone H2B type 1-B OS=Mus musculus (Mouse) OX=10090 GN=Hist1h2bb PE=1 SV=3;>sp|Q64478|H2B1H_MOUSE Histone H2B type 1-H OS=Mus musculus (Mouse) OX=10090 GN=Hist1h2bh PE=1 SV=3;>…	H2BC13;H2BC14;HIST1H2BB;HIST1H2BH;HIST2H2BE;HIST2H2BB;H2BC8;HIST3H2BB;H2BC12;HIST1H2BP;HIST3H2BA	16.1588	16.3034	16.4766	16.2807	16.3491	16.4171	15.5835	16.1031	15.7651	16.8811	16.7575	15.978
P02301;P68433;P84228;P84244	>sp|P02301|H3C_MOUSE Histone H3.3C OS=Mus musculus (Mouse) OX=10090 GN=H3f3c PE=3 SV=3;>sp|P68433|H31_MOUSE Histone H3.1 OS=Mus musculus (Mouse) OX=10090 GN=H3c11 PE=1 SV=2;>sp|P84228|H32_MOUSE Histone H3.2 OS=Mus musculus (Mouse) OX=10090 GN=Hist1h3d PE=1 SV=2;>sp|P84244|H33_MOUSE Histone H3.3 OS=Mus musculus (Mouse) OX=10090 GN=H3-3b PE=1 SV=2	H3F3C;H3C11;HIST1H3D;H3-3B	15.9843	15.6714	16.9145	16.7217	16.4056	16.4897	15.2945	15.8399	15.5046	16.945	16.458	15.8948
P62806	>sp|P62806|H4_MOUSE Histone H4 OS=Mus musculus (Mouse) OX=10090 GN=H4c9 PE=1 SV=2	H4C9	16.5829	16.3134	17.0355	16.1407	16.5799	16.3359	16.0457	16.2685	16.3514	17.1697	16.9277	16.3604
Q8CFX1	>sp|Q8CFX1|G6PE_MOUSE GDH/6PGL endoplasmic bifunctional protein OS=Mus musculus (Mouse) OX=10090 GN=H6pd PE=1 SV=2	H6PD	12.4184	12.4639	12.2358	12.2519	12.4994	12.3361	11.1723	11.359	11.4388	11.3246	11.4969	11.4601
Q9D3B1	>sp|Q9D3B1|HACD2_MOUSE Very-long-chain (3R)-3-hydroxyacyl-CoA dehydratase 2 OS=Mus musculus (Mouse) OX=10090 GN=Hacd2 PE=1 SV=1	HACD2							11.2747	11.4751	12.4967		11.5707	12.3628
Q8K2C9	>sp|Q8K2C9|HACD3_MOUSE Very-long-chain (3R)-3-hydroxyacyl-CoA dehydratase 3 OS=Mus musculus (Mouse) OX=10090 GN=Hacd3 PE=1 SV=2	HACD3	13.2986	13.3091	13.2477	13.2366	13.5381	13.3783	13.3957	13.1821	13.134	12.7315	13.3172	13.3857
Q9QXE0	>sp|Q9QXE0|HACL1_MOUSE 2-hydroxyacyl-CoA lyase 1 OS=Mus musculus (Mouse) OX=10090 GN=Hacl1 PE=1 SV=2	HACL1	9.84212	9.96755	10.1318	10.0535	10.4334	10.076	10.1426	10.0399	10.3481	10.773	10.167	9.56407
Q61425	>sp|Q61425|HCDH_MOUSE Hydroxyacyl-coenzyme A dehydrogenase, mitochondrial OS=Mus musculus (Mouse) OX=10090 GN=Hadh PE=1 SV=2	HADH	13.8838	14.0426	14.5909	14.5932	14.4393	14.1031	14.3411	14.1342	14.383	14.7878	14.7757	14.5086
Q8BMS1	>sp|Q8BMS1|ECHA_MOUSE Trifunctional enzyme subunit alpha, mitochondrial OS=Mus musculus (Mouse) OX=10090 GN=Hadha PE=1 SV=1	HADHA	14.2154	14.441	14.7028	14.8154	14.6374	14.4892	14.1688	14.2313	14.2153	14.6162	14.4402	14.4477
Q99JY0	>sp|Q99JY0|ECHB_MOUSE Trifunctional enzyme subunit beta, mitochondrial OS=Mus musculus (Mouse) OX=10090 GN=Hadhb PE=1 SV=1	HADHB	13.764	14.0153	14.058	14.3688	14.2416	14.0418	13.8244	13.7808	13.7851	14.0547	14.1195	14.0758
Q99KB8	>sp|Q99KB8|GLO2_MOUSE Hydroxyacylglutathione hydrolase, mitochondrial OS=Mus musculus (Mouse) OX=10090 GN=Hagh PE=1 SV=2	HAGH	11.2314	11.4167	11.712	11.6722	11.4864	11.2332	11.4991	11.327	11.2326	11.5864	11.791	11.6479
Q9NYQ2	>sp|Q9NYQ2|HAOX2_MOUSE Hydroxyacid oxidase 2 OS=Mus musculus (Mouse) OX=10090 GN=Hao2 PE=1 SV=1	HAO2	11.8093	11.7204	11.9498	10.8311	11.5589	10.8443	12.2833	12.4288	12.3534	12.1444	11.7833	11.3592
Q61035	>sp|Q61035|SYHC_MOUSE Histidine--tRNA ligase, cytoplasmic OS=Mus musculus (Mouse) OX=10090 GN=Hars PE=1 SV=2	HARS	12.2471	12.3453	12.2946	12.3661	12.199	12.6686	12.3831	12.4395	12.0555	11.8986	11.9829	12.1078
Q61035;Q99KK9	>sp|Q61035|SYHC_MOUSE Histidine--tRNA ligase, cytoplasmic OS=Mus musculus (Mouse) OX=10090 GN=Hars PE=1 SV=2;>sp|Q99KK9|SYHM_MOUSE Probable histidine--tRNA ligase, mitochondrial OS=Mus musculus (Mouse) OX=10090 GN=Hars2 PE=1 SV=1	HARS;HARS2	13.8603	13.7619	13.199	13.7021	13.6283	14.0118	13.6058	13.9947	13.6442	13.8789	13.8469	13.7394
Q99KK9	>sp|Q99KK9|SYHM_MOUSE Probable histidine--tRNA ligase, mitochondrial OS=Mus musculus (Mouse) OX=10090 GN=Hars2 PE=1 SV=1	HARS2	11.7106	11.9705	11.7896	12.1164	11.7771	11.656	11.824	11.754	12.0358	11.6042	11.9527	11.8454
Q61647	>sp|Q61647|HYAS1_MOUSE Hyaluronan synthase 1 OS=Mus musculus (Mouse) OX=10090 GN=Has1 PE=1 SV=1	HAS1							13.9093		13.6595	14.7319	14.4274	13.7749
Q8BY71	>sp|Q8BY71|HAT1_MOUSE Histone acetyltransferase type B catalytic subunit OS=Mus musculus (Mouse) OX=10090 GN=Hat1 PE=1 SV=1	HAT1	9.34498	9.62276	9.72221		9.83262	9.85733	9.15765	9.1334	9.33422	9.19524		8.97669
O35387	>sp|O35387|HAX1_MOUSE HCLS1-associated protein X-1 OS=Mus musculus (Mouse) OX=10090 GN=Hax1 PE=1 SV=1	HAX1	11.3085	12.2667	11.0229	11.7713	11.2669	11.4615	12.0065	11.6374	11.9771	11.0646	11.0561	11.9825
P01942	>sp|P01942|HBA_MOUSE Hemoglobin subunit alpha OS=Mus musculus (Mouse) OX=10090 GN=Hba PE=1 SV=2	HBA	18.2992	17.9644	18.1314	17.0136	16.6377	15.3064	14.3268	15.3241	15.5524	16.5788	16.9156	16.7627
P02089	>sp|P02089|HBB2_MOUSE Hemoglobin subunit beta-2 OS=Mus musculus (Mouse) OX=10090 GN=Hbb-b2 PE=1 SV=2	HBB-B2	18.4129	18.4479	18.0551	17.0952	16.24	15.3497	14.2756	15.0568	15.7205	16.5808	17.0339	16.949
P02089;P02104	>sp|P02089|HBB2_MOUSE Hemoglobin subunit beta-2 OS=Mus musculus (Mouse) OX=10090 GN=Hbb-b2 PE=1 SV=2;>sp|P02104|HBE_MOUSE Hemoglobin subunit epsilon-Y2 OS=Mus musculus (Mouse) OX=10090 GN=Hbb-y PE=1 SV=2	HBB-B2;HBB-Y	21.638	21.3779	20.9699	19.7198	20.3962	18.4351	17.804	18.9795	19.5072	19.0847	20.1243	20.2943
A8DUK4	>tr|A8DUK4|A8DUK4_MOUSE GLOBIN domain-containing protein OS=Mus musculus (Mouse) OX=10090 GN=Hbb-bs PE=1 SV=1	HBB-BS	17.9119	17.7503	17.0666	15.7512	15.942	14.5156	13.6601	14.8744	15.0994	15.3985	15.7979	15.9109
Q69ZS7	>sp|Q69ZS7|HBS1L_MOUSE HBS1-like protein OS=Mus musculus (Mouse) OX=10090 GN=Hbs1l PE=1 SV=2	HBS1L	10.051	10.1253	9.76728	9.34371	9.98935	9.62594	9.94444	9.74337	9.64985	10.2261	10.0823	9.5784
P53702	>sp|P53702|CCHL_MOUSE Cytochrome c-type heme lyase OS=Mus musculus (Mouse) OX=10090 GN=Hccs PE=1 SV=2	HCCS	11.1034	11.3623	11.693	11.5359	11.8219	11.263	11.075	10.4404	11.3511		11.4217	11.2804
Q61191	>sp|Q61191|HCFC1_MOUSE Host cell factor 1 OS=Mus musculus (Mouse) OX=10090 GN=Hcfc1 PE=1 SV=2	HCFC1	11.6305	11.1166	11.3559	11.3126	11.4782	11.806	11.6305	11.5194	11.3833	11.4856	11.1169	11.4477
O09106	>sp|O09106|HDAC1_MOUSE Histone deacetylase 1 OS=Mus musculus (Mouse) OX=10090 GN=Hdac1 PE=1 SV=1	HDAC1	11.1961	10.8073	10.7668	11.0714	10.9792	10.593	11.2043	10.9387	10.5912	10.8928	11.1704	11.1393
O09106;P70288	>sp|O09106|HDAC1_MOUSE Histone deacetylase 1 OS=Mus musculus (Mouse) OX=10090 GN=Hdac1 PE=1 SV=1;>sp|P70288|HDAC2_MOUSE Histone deacetylase 2 OS=Mus musculus (Mouse) OX=10090 GN=Hdac2 PE=1 SV=1	HDAC1;HDAC2	12.6277	12.2736	12.196	12.3152	11.9535	12.3727	12.4215	12.8005	12.3921	12.3274	12.5024	12.4505
P70288	>sp|P70288|HDAC2_MOUSE Histone deacetylase 2 OS=Mus musculus (Mouse) OX=10090 GN=Hdac2 PE=1 SV=1	HDAC2	11.4052	10.7857	11.3296	10.9471	10.679	11.5538	11.3866	11.5608	11.0354	11.2351	10.9159	11.2874
O88895	>sp|O88895|HDAC3_MOUSE Histone deacetylase 3 OS=Mus musculus (Mouse) OX=10090 GN=Hdac3 PE=1 SV=1	HDAC3	9.82894	10.6312	10.8577	9.87167	9.8559	9.98739
Q9Z2V5	>sp|Q9Z2V5|HDAC6_MOUSE Histone deacetylase 6 OS=Mus musculus (Mouse) OX=10090 GN=Hdac6 PE=1 SV=3	HDAC6	8.84279	8.99649	9.78808		9.34472	9.72166
Q3SXD3	>sp|Q3SXD3|HDDC2_MOUSE HD domain-containing protein 2 OS=Mus musculus (Mouse) OX=10090 GN=Hddc2 PE=1 SV=1	HDDC2	10.9887	11.2638	11.1676	11.468	11.1908	10.6395	11.4692	11.2879	11.1316	11.3198	11.3372	10.5532
P51859	>sp|P51859|HDGF_MOUSE Hepatoma-derived growth factor OS=Mus musculus (Mouse) OX=10090 GN=Hdgf PE=1 SV=2	HDGF	12.136	11.9798	12.2273	12.3412	12.0709	12.5612	12.4899	12.4815	12.2009	12.1967	12.146	12.0622
P51859;Q3UMU9;Q99JF8;Q9JMG7	>sp|P51859|HDGF_MOUSE Hepatoma-derived growth factor OS=Mus musculus (Mouse) OX=10090 GN=Hdgf PE=1 SV=2;>sp|Q3UMU9|HDGR2_MOUSE Hepatoma-derived growth factor-related protein 2 OS=Mus musculus (Mouse) OX=10090 GN=Hdgfl2 PE=1 SV=1;>sp|Q99JF8|PSIP1_MOUSE PC4 and SFRS1-interacting protein OS=Mus musculus (Mouse) OX=10090 GN=Psip1 PE=1 SV=1;>sp|Q9JMG7|HDGR3_MOUSE Hepatoma-derived growth factor-related…	HDGF;HDGFL2;PSIP1;HDGFL3	12.572	13.0245	12.7063	14.0119	13.8126	14.4148	13.6708	13.1736	12.5853	12.9736	13.1581	13.6703
Q3UMU9	>sp|Q3UMU9|HDGR2_MOUSE Hepatoma-derived growth factor-related protein 2 OS=Mus musculus (Mouse) OX=10090 GN=Hdgfl2 PE=1 SV=1	HDGFL2	10.8441	10.4191	11.321	10.4936	10.9464	11.3638	11.3742	11.1842	11.2476	11.5054	11.6536	11.5224
Q9JMG7	>sp|Q9JMG7|HDGR3_MOUSE Hepatoma-derived growth factor-related protein 3 OS=Mus musculus (Mouse) OX=10090 GN=Hdgfl3 PE=1 SV=2	HDGFL3	10.5001	10.3613	10.2757	9.94069	10.642	10.4045	10.279	10.3617	10.6324	10.9037	10.79	10.7154
Q3UGR5	>sp|Q3UGR5|HDHD2_MOUSE Haloacid dehalogenase-like hydrolase domain-containing protein 2 OS=Mus musculus (Mouse) OX=10090 GN=Hdhd2 PE=1 SV=2	HDHD2	12.8035	13.3804	12.6847	12.7185	12.9588	12.329	13.031	13.0434	13.3536	12.4658	12.4733	12.9311
Q9CYW4	>sp|Q9CYW4|HDHD3_MOUSE Haloacid dehalogenase-like hydrolase domain-containing protein 3 OS=Mus musculus (Mouse) OX=10090 GN=Hdhd3 PE=1 SV=1	HDHD3	12.2254	12.3133	12.9223	12.8989	13.0974	12.9847	12.7139	12.4554	12.9409	13.0843	13.3284	12.9838
Q91WM2	>sp|Q91WM2|HDHD5_MOUSE Haloacid dehalogenase-like hydrolase domain-containing 5 OS=Mus musculus (Mouse) OX=10090 GN=Hdhd5 PE=1 SV=1	HDHD5	11.2141	11.7177	11.2628	11.5149	11.7804	11.3473	11.6678	11.888	11.8674	11.55	11.8125	12.0701
Q8VDJ3	>sp|Q8VDJ3|VIGLN_MOUSE Vigilin OS=Mus musculus (Mouse) OX=10090 GN=Hdlbp PE=1 SV=1	HDLBP	11.6831	11.4683	11.5227	11.4576	11.3794	11.6622	11.3346	11.5061	11.1676	11.2772	11.4124	11.1923
G3X9B1	>tr|G3X9B1|G3X9B1_MOUSE HEAT repeat-containing 1 OS=Mus musculus (Mouse) OX=10090 GN=Heatr1 PE=1 SV=1	HEATR1	11.2199	11.1949	11.8593	11.256	11.7928	11.873	11.1498	10.5311	10.1797	12.0342	12.6673
Q8BQM4	>sp|Q8BQM4|HEAT3_MOUSE HEAT repeat-containing protein 3 OS=Mus musculus (Mouse) OX=10090 GN=Heatr3 PE=1 SV=1	HEATR3							10.4971	10.8849	10.3787	9.83392	9.96929	10.1059
Q69ZR2	>sp|Q69ZR2|HECD1_MOUSE E3 ubiquitin-protein ligase HECTD1 OS=Mus musculus (Mouse) OX=10090 GN=Hectd1 PE=1 SV=2	HECTD1							9.20465	8.93437	8.71877	9.90265	10.0187	8.71618
Q3U487	>sp|Q3U487|HECD3_MOUSE E3 ubiquitin-protein ligase HECTD3 OS=Mus musculus (Mouse) OX=10090 GN=Hectd3 PE=1 SV=2	HECTD3	9.9913	9.71572	10.3809	10.9009	10.2891	10.7475	10.0436	10.2302	9.75283	9.95646	10.2873	10.2482
Q6PAV2	>sp|Q6PAV2|HERC4_MOUSE Probable E3 ubiquitin-protein ligase HERC4 OS=Mus musculus (Mouse) OX=10090 GN=Herc4 PE=1 SV=2	HERC4	11.1585	11.1889	10.706	11.1411	10.8089	10.9328	10.7272	10.9678	10.7491	10.7949	11.2565	10.4868
P29416	>sp|P29416|HEXA_MOUSE Beta-hexosaminidase subunit alpha OS=Mus musculus (Mouse) OX=10090 GN=Hexa PE=1 SV=2	HEXA	11.0798	11.2402	11.2596	11.2308	11.5537	11.2973	11.1757	11.1905	11.241	11.0531	11.3928	11.3482
P20060	>sp|P20060|HEXB_MOUSE Beta-hexosaminidase subunit beta OS=Mus musculus (Mouse) OX=10090 GN=Hexb PE=1 SV=2	HEXB	11.0591	10.8824	11.2874	11.0923	11.1408	11.2015	11.1815	11.241	11.0433	11.4002	11.3176	11.0625
Q8R409	>sp|Q8R409|HEXI1_MOUSE Protein HEXIM1 OS=Mus musculus (Mouse) OX=10090 GN=Hexim1 PE=1 SV=1	HEXIM1	9.75513	8.62007	9.59697	9.63342	9.74473	10.2123	9.92819	10.1678	9.97489	10.301	10.7512	10.0539
P70387	>sp|P70387|HFE_MOUSE Hereditary hemochromatosis protein homolog OS=Mus musculus (Mouse) OX=10090 GN=Hfe PE=1 SV=2	HFE	9.33397	9.42404		9.81152	9.8786	9.46378
Q99LI8	>sp|Q99LI8|HGS_MOUSE Hepatocyte growth factor-regulated tyrosine kinase substrate OS=Mus musculus (Mouse) OX=10090 GN=Hgs PE=1 SV=2	HGS	12.0617	11.737	11.3339	12.0509	11.8779	12.3484	11.9231	12.13	11.6713	11.5689	11.7467	11.5366
Q3UDW8	>sp|Q3UDW8|HGNAT_MOUSE Heparan-alpha-glucosaminide N-acetyltransferase OS=Mus musculus (Mouse) OX=10090 GN=Hgsnat PE=1 SV=2	HGSNAT	11.8585	11.9568	12.6812	12.5444	12.1995	12.3036	12.1327	11.7716	12.2166	12.8689	12.427	12.2474
Q99L13	>sp|Q99L13|3HIDH_MOUSE 3-hydroxyisobutyrate dehydrogenase, mitochondrial OS=Mus musculus (Mouse) OX=10090 GN=Hibadh PE=1 SV=1	HIBADH	12.3415	12.6802	12.7033	12.3267	13.1826	12.4269	12.7304	12.5812	12.8168	12.1557	12.5392	12.8632
Q8QZS1	>sp|Q8QZS1|HIBCH_MOUSE 3-hydroxyisobutyryl-CoA hydrolase, mitochondrial OS=Mus musculus (Mouse) OX=10090 GN=Hibch PE=1 SV=1	HIBCH	13.4194	13.6749	13.5497	13.5808	13.7188	13.1926	13.6487	13.5746	13.9543	13.6388	13.8085	13.9108
Q8R1F6	>sp|Q8R1F6|HID1_MOUSE Protein HID1 OS=Mus musculus (Mouse) OX=10090 GN=Hid1 PE=1 SV=1	HID1	11.2363	10.789	10.9031	11.015	11.3452	11.5728
Q9JLR9	>sp|Q9JLR9|HIG1A_MOUSE HIG1 domain family member 1A, mitochondrial OS=Mus musculus (Mouse) OX=10090 GN=Higd1a PE=1 SV=1	HIGD1A	12.8313	12.8828	11.6273	11.4555	12.1588	11.0144	12.5009	12.5704	13.1859	12.9164	12.0524	12.9033
P70349	>sp|P70349|HINT1_MOUSE Histidine triad nucleotide-binding protein 1 OS=Mus musculus (Mouse) OX=10090 GN=Hint1 PE=1 SV=3	HINT1	13.1457	12.53	13.6243	13.0592	12.9068	13.4117	12.706	12.8448	12.9319	13.6425	13.1179	13.1166
Q9D0S9	>sp|Q9D0S9|HINT2_MOUSE Histidine triad nucleotide-binding protein 2, mitochondrial OS=Mus musculus (Mouse) OX=10090 GN=Hint2 PE=1 SV=1	HINT2	12.1783	12.6574	12.4931	12.4252	12.823	12.4478	12.4855	12.7276	12.7094	13.0913	13.0263	12.6488
Q9CPS6	>sp|Q9CPS6|HINT3_MOUSE Histidine triad nucleotide-binding protein 3 OS=Mus musculus (Mouse) OX=10090 GN=Hint3 PE=1 SV=1	HINT3	12.0367	11.8054	11.5902	10.7187	12.1828	11.3985	12.3877	12.0928	11.9068	11.9074	12.4166	12.4693
Q8VD75	>sp|Q8VD75|HIP1_MOUSE Huntingtin-interacting protein 1 OS=Mus musculus (Mouse) OX=10090 GN=Hip1 PE=1 SV=2	HIP1	9.53487	10.1722		9.98337	9.89323	10.0208
Q64522	>sp|Q64522|H2A2B_MOUSE Histone H2A type 2-B OS=Mus musculus (Mouse) OX=10090 GN=Hist2h2ab PE=1 SV=3	HIST2H2AB	16.9413	16.8158	17.6118	17.0174	17.514	17.189	16.8814	16.8519	16.8923	17.7996	17.8627	17.2401
Q64523;Q6GSS7	>sp|Q64523|H2A2C_MOUSE Histone H2A type 2-C OS=Mus musculus (Mouse) OX=10090 GN=Hist2h2ac PE=1 SV=3;>sp|Q6GSS7|H2A2A_MOUSE Histone H2A type 2-A OS=Mus musculus (Mouse) OX=10090 GN=Hist2h2aa1 PE=1 SV=3	HIST2H2AC;HIST2H2AA1	10.5896	10.8671	10.4941	10.8508	11.3149	10.8074	11.0754	11.47	9.92015	11.1832	11.1446	10.4927
Q64524;Q8CGP0;Q9D2U9	>sp|Q64524|H2B2E_MOUSE Histone H2B type 2-E OS=Mus musculus (Mouse) OX=10090 GN=Hist2h2be PE=1 SV=3;>sp|Q8CGP0|H2B3B_MOUSE Histone H2B type 3-B OS=Mus musculus (Mouse) OX=10090 GN=Hist3h2bb PE=1 SV=3;>sp|Q9D2U9|H2B3A_MOUSE Histone H2B type 3-A OS=Mus musculus (Mouse) OX=10090 GN=Hist3h2ba PE=1 SV=3	HIST2H2BE;HIST3H2BB;HIST3H2BA	11.6427	12.0539	11.8533	11.9906	12.0404	11.8797	11.6891	11.6211	12.1833	12.1468	12.3492	12.0103
P17710	>sp|P17710|HXK1_MOUSE Hexokinase-1 OS=Mus musculus (Mouse) OX=10090 GN=Hk1 PE=1 SV=3	HK1	12.5217	12.2704	12.4675	12.4649	12.3197	12.4062	12.6936	12.5164	12.5792	12.6734	12.6732	12.5626
O08528	>sp|O08528|HXK2_MOUSE Hexokinase-2 OS=Mus musculus (Mouse) OX=10090 GN=Hk2 PE=1 SV=1	HK2							12.0338	12.585	12.3561	12.0995	11.6798	12.402
O08528;P17710	>sp|O08528|HXK2_MOUSE Hexokinase-2 OS=Mus musculus (Mouse) OX=10090 GN=Hk2 PE=1 SV=1;>sp|P17710|HXK1_MOUSE Hexokinase-1 OS=Mus musculus (Mouse) OX=10090 GN=Hk1 PE=1 SV=3	HK2;HK1	13.3782	13.3877	13.5824	13.4944	13.278	13.0796	13.2421	13.4748	13.6464	13.7651	13.1069	13.5625
Q91W97	>sp|Q91W97|HKDC1_MOUSE Hexokinase HKDC1 OS=Mus musculus (Mouse) OX=10090 GN=Hkdc1 PE=2 SV=1	HKDC1	12.4608	12.7097	11.8389	11.9929	11.2473	10.6168	12.4997	12.6093	13.1081	11.7149		12.3824
Q920N2	>sp|Q920N2|BPL1_MOUSE Biotin--protein ligase OS=Mus musculus (Mouse) OX=10090 GN=Hlcs PE=1 SV=1	HLCS	11.7185	11.3528	12.0039	11.9095	11.6611	11.8277	11.6034	11.9152	12.2085	12.2739	11.7221	11.4137
Q6PCN7	>sp|Q6PCN7|HLTF_MOUSE Helicase-like transcription factor OS=Mus musculus (Mouse) OX=10090 GN=Hltf PE=1 SV=1	HLTF	10.9196	12.3203	12.8849	12.4224	12.2173	12.2193	11.932	12.1401	11.7014	13.2016	12.4828	12.0894
[truncated: 2,895 more rows]

## Sheet: samples
sample_index	sample_id	shortname	exclude	group	detected_peptides	detected_proteins	contrast: LPS vs PBS
1	adrencort_3_S1-A3_1_984.d	3_s1-a3_1_984	FALSE	LPS	32995	5145	1
[truncated: 11 more rows]
