# Supplementary material for: Succinate mediates inflammation-induced adrenocortical dysfunction
Source: eLife journal article supplement (doi:10.7554/elife.83064), 2023-07-14
Supplement: supp [file Figure2-Suppl1_SourceData1via.xlsx]

## Sheet: Sheet1
Figure 2 - figure supplement 1 - Source Data 1
Figure 2 - figure supplement 1 A: Expression of Idh1, Idh2, Sdhb and Sdhc in CD31+ cells of PBS- and LPS-mice
Summary Statistics (arithmetic from GraphPad Prism 7.04)
Idh1			Idh2			Sdhb			Sdhc
PBS	LPS		PBS	LPS		PBS	LPS		PBS	LPS
1	1.26		1.17	1.11		0.88	1.34		1.08	1.62
1.05	0.7		0.6	0.46		0.91	1.64		0.74	1.04
1.25	0.54		0.98	0.39		1.24	1.78		0.97	1.15
1.08	0.57		1.3	2.03		1	2.24		1.28	2.76
1.16	0.33		1.54	0.61		1.11	1.33		0.98	1.2
0.99	0.56		1.26	0.13		1.02	0.74		1.18	0.46
0.76	0.32		1.03	0.39		0.81	1.46		1.06	1.16
0.8			0.56	0.09		1.09	1.08		0.82	0.72
p value = 0.0205			p value = 0.0614			p value = 0.0281			p value = 0.5054
