# Supplementary material for: Succinate mediates inflammation-induced adrenocortical dysfunction
Source: eLife journal article supplement (doi:10.7554/elife.83064), 2023-07-14
Supplement: supp [file Figure2-Suppl1_SourceData2.xlsx]

## Sheet: Sheet1
Figure 2 - figure supplement 1 - Source Data 1
Figure 2 - figure supplement 1 B: Expression of Idh1, Idh2, Sdhb and Sdhc in CD45+ cells of PBS- and LPS-mice
Summary Statistics (arithmetic from GraphPad Prism 7.04)
Idh1			Idh2			Sdhb			Sdhc
PBS	LPS		PBS	LPS		PBS	LPS		PBS	LPS
1.12	0.58		1.02	0.39		1	1.28		0.88	1.05
1.52	0.35		1.29	0.22		1.14	1.01		1.13	0.55
0.91	0.43		0.78	0.22		0.94	1.31		0.91	1.13
0.81	0.43		0.79	0.25		0.78	1.27		1.03	0.97
1.12	0.47		1.06	0.48		0.98	1.18		0.79	1.26
0.94	0.33		1.1	0.35		1.09	1.35		0.85	1.31
0.79	0.54		0.95	0.33		0.96	1.2		1.01	1.25
0.97	0.48		1.13	0.3		1.17	1.26		1.58	1.27
p value = 0.0002			p value = 0.0002			p value = 0.0011			p value = 0.2045
