# Supplementary material for: Succinate mediates inflammation-induced adrenocortical dysfunction
Source: eLife journal article supplement (doi:10.7554/elife.83064), 2023-07-14
Supplement: supp [file Figure2_SourceData1.xlsx]

## Sheet: Sheet1
Figure 2 - Source Data 1
Figure 2 B: Heatmap of differentially expressed TCA cycle genes in adrenal cortex of PBS- and LPS-mice
	PBS_11R	PBS_13R	PBS_14R	LPS_1R	LPS_2R	LPS_3R
Sdhb	0.123127	1.25212	0.911673	-1.31728	-0.921033	-0.0486052
Idh3b	0.405719	1.15655	0.807845	-1.1854	-1.19991	0.0151888
Sdhc	0.79996	0.869232	0.918609	-1.14199	-1.17641	-0.269401
Mdh1	0.268269	1.20842	0.908841	-1.09813	-1.19469	-0.0927134
Idh2	0.678224	0.552445	1.06617	-0.691397	-1.61861	0.0131699
