# Supplementary material for: Succinate mediates inflammation-induced adrenocortical dysfunction
Source: eLife journal article supplement (doi:10.7554/elife.83064), 2023-07-14
Supplement: supp [file Figure2_SourceData2.xlsx]

## Sheet: Sheet1
Figure 2 - Source Data 2
Figure 2 D, E: Expression of Idh1, Idh2, Sdhb and Sdhc in CD31-CD45- cells of PBS- and LPS-mice
Summary Statistics (arithmetic from GraphPad Prism 7.04)
Idh1			Idh2			Sdhb			Sdhc
PBS	LPS		PBS	LPS		PBS	LPS		PBS	LPS
1.51	0.93		1.14	0.72		1.06	1.01		1.06	0.69
1	0.5		1.03	0.51		0.85	0.72		0.96	0.56
1.1	0.43		0.89	0.44		0.94	0.79		1.11	0.87
1.22	0.39		0.92	0.32		1.08	0.66		1.09	0.84
1.25	0.4		1.47	0.43		1	0.71		1.24	0.58
0.86	0.59		0.97	0.35		0.94	0.67		0.92	0.73
0.8	0.48		0.89	0.39		0.98	0.69		0.89	0.78
0.57	0.32		0.81	0.27		1.18	0.63		0.8	0.74
p value = 0.0019			p value = 0.0002			p value = 0.0026			p value = 0.0006
