# Supplementary material for: Succinate mediates inflammation-induced adrenocortical dysfunction
Source: eLife journal article supplement (doi:10.7554/elife.83064), 2023-07-14
Supplement: supp [file Figure2_SourceData3.xlsx]

## Sheet: Sheet1
Figure 2 - Source Data 3
Figure 2 F, G: Quantification of IDH and SDH activity (normalized to protein amount) in adrenal cortex of PBS- and LPS-mice
Summary Statistics (arithmetic from GraphPad Prism 7.04)
IDH activity (nmol/min/mL)			SDH activity (nmol/min/mL)
PBS	LPS		PBS	LPS
0.374426	0.33208		0.0738	0.0534
0.351812	0.280044		0.0779	0.0535
0.298824	0.326479		0.122	0.0472
0.347668	0.331678		0.1197	0.0613
0.359841	0.267972		0.1316	0.0646
0.359711	0.27435		0.0828	0.0521
p value = 0.0152			p value = 0.0022
