# Supplementary material for: Succinate mediates inflammation-induced adrenocortical dysfunction
Source: eLife journal article supplement (doi:10.7554/elife.83064), 2023-07-14
Supplement: supp [file Figure2_SourceData4.xlsx]

## Sheet: Sheet1
Figure 2 - Source Data 4
Figure 2 J - O: TCA cycle metabolites measurement in adrenal gland of PBS- and LPS-mice
Summary Statistics (arithmetic from GraphPad Prism 7.04)
Isocitrate (ng/adrenal)			a-ketoglutarate (ng/adrenal)			Succinate (ng/adrenal)			Fumarate (ng/adrenal)			Isocitrate/a-ketoglutarate ratio			Succinate/fumarate ratio
PBS	LPS		PBS	LPS		PBS	LPS		PBS	LPS		PBS	LPS		PBS	LPS
8.8	16.5		0.8	0.6		27	44.8		12.1	16.2		11.67	26.57		2.24	2.77
7.6	9.5		0.9	0.9		26.7	44.7		15.5	18.3		8.7	10.97		1.72	2.44
7.4	18.6		0.9	0.8		33.4	80.1		18.3	21.9		8.37	22.8		1.83	3.65
9.5	13.8		0.9	1.6		34.8	78.4		22.9	36.1		10.18	18.44		1.51	2.17
p value = 0.0286			p value = 0.4429			p value = 0.0143			p value = 0.2			p value = 0.0286			p value = 0.0286
