# Supplementary material for: Succinate mediates inflammation-induced adrenocortical dysfunction
Source: eLife journal article supplement (doi:10.7554/elife.83064), 2023-07-14
Supplement: supp [file Figure2_SourceData5.xlsx]

## Sheet: Sheet1
Figure 2 - Source Data 5
Figure 2 P - Q: Isocitrate and succinate measured by MALDI-MSI in adrenal cortex of PBS- and LPS-mice
Summary Statistics (arithmetic from GraphPad Prism 7.04)
Isocitrate (relative intensity)			Succinate (relative intensity)
PBS	LPS		PBS	LPS
704200	818900		33889	46952
428600	937900		11021	47489
432300	1189000		35142	58941
p value = 0.05			p value = 0.05
