# Supplementary material for: Succinate mediates inflammation-induced adrenocortical dysfunction
Source: eLife journal article supplement (doi:10.7554/elife.83064), 2023-07-14
Supplement: supp [file Figure3_SourceData1via.xlsx]

## Sheet: Sheet1
Figure 3 - Source Data 1
Figure 3 C: Heatmap of differentially expressed genes related to oxidative phosphorylation in adrenal cortex of PBS- and LPS-mice
	PBS_1R	PBS_2R	PBS_3R	LPS_1R	LPS_2R	LPS_3R
Ndufa3	0.358528	0.844429	1.35713	-1.13968	-0.777084	-0.643327
Cox6b1	0.331388	0.822552	1.30546	-1.39061	-0.581396	-0.487391
Ndufa12	0.289362	0.882849	1.30293	-1.29948	-0.760313	-0.415345
Ndufa2	0.528521	0.546943	1.30226	-1.54115	-0.401529	-0.435044
Ndufb7	0.578468	0.726379	1.27562	-1.29939	-0.668247	-0.612836
Lhpp	0.402536	0.732518	1.27048	-0.767062	-1.43429	-0.204175
Ndufa11	0.364477	0.907749	1.26177	-1.15602	-0.976456	-0.401522
Ndufs8	0.34208	0.806278	1.22908	-1.51435	-0.599679	-0.263407
Uqcrh	0.452545	0.583611	1.22314	-1.6554	-0.435799	-0.168091
Atp5j	0.353502	0.806472	1.21439	-1.53825	-0.548726	-0.287393
Cox7a1	0.896719	0.601111	1.17412	-1.11476	-0.79979	-0.757395
Ndufb4	0.562586	0.873105	1.16453	-1.04273	-1.14267	-0.414822
Uqcr11	-0.00676833	1.08069	1.16051	-1.35671	-0.799016	-0.0786997
Atp5o	0.622753	0.706519	1.15971	-1.44788	-0.775302	-0.265798
Ndufb10	0.556262	0.807194	1.15939	-1.26151	-1.02307	-0.238268
Ndufa1	0.215805	0.919482	1.14869	-1.54778	-0.61494	-0.121255
Ndufc1	0.478823	0.973522	1.14749	-1.22343	-0.864616	-0.511788
Cox4i1	0.400411	0.942452	1.1398	-1.25685	-1.01373	-0.21208
Ndufa13	0.389364	0.94113	1.13874	-1.46892	-0.563071	-0.437245
Cox8a	0.284445	0.909672	1.13795	-1.54014	-0.631612	-0.160319
Ndufv3	0.187241	1.19037	1.13214	-0.905509	-1.08448	-0.519764
Cox6a1	0.576699	0.788913	1.13131	-1.48368	-0.665566	-0.347671
Cox7a2l	0.678113	0.487272	1.12873	-1.09302	-1.34643	0.145333
Ndufb9	0.182388	1.08642	1.12544	-1.33902	-0.819217	-0.23601
Ndufa10	0.368241	1.00132	1.1232	-1.01851	-1.22504	-0.249206
Ndufb2	0.609179	0.768459	1.10795	-1.46817	-0.771115	-0.246301
Ppa2	0.770212	0.597016	1.09892	-1.0833	-1.28852	-0.0943187
Ndufa7	0.522037	0.89866	1.09842	-1.29789	-0.986883	-0.234342
Cox5b	0.179109	1.06408	1.09649	-1.34144	-0.908792	-0.0894452
Atp6v1f	0.378089	0.962876	1.09642	-1.30774	-1.00045	-0.129195
Ndufb5	0.538284	0.716079	1.09386	-1.59215	-0.67821	-0.0778632
Ndufa9	0.572238	0.8912	1.09318	-1.1799	-1.10274	-0.273986
Uqcrfs1	0.641087	0.918494	1.0725	-1.02023	-1.16315	-0.448692
Ndufb6	0.578514	0.678599	1.06574	-1.66128	-0.543328	-0.118243
Atp5j2	0.463637	1.01474	1.05513	-1.39893	-0.711194	-0.423378
Ndufb8	0.624137	0.8844	1.0533	-1.41012	-0.759151	-0.392566
Atp4a	0.674049	0.935373	1.04891	-0.737783	-1.26189	-0.658659
Ndufb3	0.590072	0.963515	1.00325	-1.08427	-1.21434	-0.258229
Ndufc2	0.987965	0.667987	0.981847	-1.25544	-0.893802	-0.48856
Atp5h	0.686333	0.959391	0.967429	-1.22384	-1.01847	-0.37084
Ndufa5	0.503088	1.11934	0.96627	-1.32946	-0.627383	-0.631857
Ndufb11	0.388299	1.14046	0.933306	-1.21846	-1.07984	-0.16377
Atp6v1g1	0.438648	0.912176	0.927509	-1.70499	-0.4348	-0.138538
Atp5e	0.0990528	1.14641	0.923799	-1.6374	-0.267754	-0.264114
Sdhc	0.79996	0.869232	0.918609	-1.14199	-1.17641	-0.269401
Ndufa6	0.341318	1.07064	0.915437	-1.53498	-0.734661	-0.0577547
Sdhb	0.123127	1.25212	0.911673	-1.31728	-0.921033	-0.0486052
Atp6v0e2	0.890572	0.663444	0.910142	-0.719713	-1.54261	-0.201838
Atp5c1	0.401226	0.926851	0.907711	-1.26159	-1.2253	0.251103
Atp5g1	1.03987	0.650318	0.85013	-1.09505	-1.23717	-0.20809
Ndufs7	0.657594	1.00906	0.848106	-1.21581	-1.15358	-0.145371
Ndufv2	1.03748	0.587332	0.837603	-1.41752	-0.923586	-0.121308
Cox6c	0.245138	1.09035	0.829825	-1.70906	-0.364967	-0.0912838
Ndufa13	-1.08156	-1.14138	0.820605	1.08654	0.716316	-0.400514
ND4	0.57662	0.998025	0.744931	-0.834752	-1.55401	0.0691825
CYTB	0.718385	0.990572	0.624436	-0.948935	-1.48404	0.0995817
ND1	0.839476	0.838632	0.6038	-0.815287	-1.59564	0.129019
ND2	0.787189	1.00289	0.57416	-1.00617	-1.42413	0.0660616
ND5	1.0077	0.962994	0.184189	-0.677945	-1.59666	0.119715
COX1	1.02917	1.12176	0.175817	-0.63538	-1.48501	-0.206369
Tcirg1	-0.872312	-0.60589	-0.881777	1.08421	1.38124	-0.105463
