# Supplementary material for: Succinate mediates inflammation-induced adrenocortical dysfunction
Source: eLife journal article supplement (doi:10.7554/elife.83064), 2023-07-14
Supplement: supp [file Figure3_SourceData2.xlsx]

## Sheet: Sheet1
Figure 3 - Source Data 2
Figure 3 D: ATP measurement in adrenal glands of PBS- and LPS-mice
Summary Statistics (arithmetic from GraphPad Prism 7.04)
ATP (pmol/mg)
PBS	LPS
25.6884	5.83495
6.42068	5.74054
6.43043	6.03704
13.1237	6.73262
7.89581	0.59681
9.60087	4.23467
4.8572	5.08643
5.58672	4.0733
3.23941	3.25704
6.99059	4.82174
4.76078
p value = 0.0430
