# Supplementary material for: Succinate mediates inflammation-induced adrenocortical dysfunction
Source: eLife journal article supplement (doi:10.7554/elife.83064), 2023-07-14
Supplement: supp [file Figure3_SourceData3.xlsx]

## Sheet: Sheet1
Figure 3 - Source Data 3
Figure 3 E: Mitochodrial membrane potential measurement, as ratio of TMRE and MTG median fluorescence intensities, in CD31-CD45- cells from PBS- and LPS-mice
Summary Statistics (arithmetic from GraphPad Prism 7.04)
TMRE/Mitotracker Green
PBS	LPS
6	0.708
3.993	0.69
1.665	0.703
4.102	0.908
6.42	1.039
1.24	1.116
p value = 0.0022
