# Supplementary material for: Succinate mediates inflammation-induced adrenocortical dysfunction
Source: eLife journal article supplement (doi:10.7554/elife.83064), 2023-07-14
Supplement: supp [file Figure3_SourceData4.xlsx]

## Sheet: Sheet1
Figure 3 - Source Data 4
Figure 3 F: Mean fluorescence intensity of 4-HNE staining in adrenal cortex of PBS- and LPS-mice
Summary Statistics (arithmetic from GraphPad Prism 7.04)
PBS	LPS
68832590	95387800
64759090	82747520
77276900	114389600
92763740	104934800
85753930	89002070
90983320	104169900
p value = 0.0411
