# Supplementary material for: Succinate mediates inflammation-induced adrenocortical dysfunction
Source: eLife journal article supplement (doi:10.7554/elife.83064), 2023-07-14
Supplement: supp [file Figure3_SourceData5.xlsx]

## Sheet: Sheet1
Figure 3 - Source Data 5
Figure 3 G: NADPH measurement in adrenal glands of PBS- and LPS-mice
Summary Statistics (arithmetic from GraphPad Prism 7.04)
NADPH (ng/adrenal)
PBS	LPS
19480	5824
12700	528.7
4234	9528
5292	10060
13230	528.7
11640	8472
11640	5820
16930	4233
p value = 0.0193
