# Supplementary material for: Succinate mediates inflammation-induced adrenocortical dysfunction
Source: eLife journal article supplement (doi:10.7554/elife.83064), 2023-07-14
Supplement: supp [file Figure4_SourceData1.xlsx]

## Sheet: Sheet1
Figure 4 - Source Data 1
Figure 4 A: Succinate and fumarate measurement in adrenal gland explants treated with DMM and DES
Summary Statistics (arithmetic from GraphPad Prism 7.04)
Succinate (ng / adrenal)				Fumarate (ng / adrenal)				Succinate / Fumarate ratio
Control	DMM	DES		Control	DMM	DES		Control	DMM	DES
3.65	6.53	17.05		0.100321	0.087933	0.130107		0.72	1.19	3.62
5.87	6.86	18.68		0.139772	0.086925	0.176794		0.63	1.56	2.09
4.46	7.11	18.91		0.10975	0.058613	0.115325		0.93	1.62	2.99
4.43	6.04	20.46		0.111157	0.065702	0.102699		0.64	1.39	3.47
6.6	7.46	19.29		0.115162	0.080947	0.106645		0.77	2.25	3.52
p value = 0.0447								p value = 0.0225
p value < 0.0001								p value < 0.0001
