# Supplementary material for: Succinate mediates inflammation-induced adrenocortical dysfunction
Source: eLife journal article supplement (doi:10.7554/elife.83064), 2023-07-14
Supplement: supp [file Figure4_SourceData2.xlsx]

## Sheet: Sheet1
Figure 4 - Source Data 2
Figure 4 B: Succinate and fumarate measurement in NCI-H295R cells treated with DMM
Summary Statistics (arithmetic from GraphPad Prism 7.06)
Succinate (ng / 1,000 cells)			Fumarate (ng / 1,000 cells)			Succinate / Fumarate ratio
Control	DMM		Control	DMM		Control	DMM
0.0836	2.3515		0.3117	0.3126		0.27	7.52
0.0561	1.6471		0.1859	0.1973		0.3	8.35
0.0702	1.4925		0.2068	0.1609		0.34	9.28
0.0653	1.3518		0.1655	0.1503		0.39	8.99
p value = 0.0286						p value = 0.0286
