# Supplementary material for: Succinate mediates inflammation-induced adrenocortical dysfunction
Source: eLife journal article supplement (doi:10.7554/elife.83064), 2023-07-14
Supplement: supp [file Figure4_SourceData3.xlsx]

## Sheet: Sheet1
Figure 4 - Source Data 3
Figure 4 C, J: Basal OCR measurement in NCI-H295R cells treated with DMM, DES or AG221
Summary Statistics (arithmetic from GraphPad Prism 7.04)
Time (minutes)	Control						DMM
1.352	354.277	385.454	402.982	408.852	365.821	342.277	325.725	343.866	353.178	353.507	327.902	284.841	p value < 0.0001
8.13593	333.278	364.086	371.188	382.36	345.532	329.231	305.539	328.683	320.039	330.983	314.367	279.815	p value < 0.0001
14.9032	328.942	357.622	363.979	374.693	339.863	327.6	302.643	322.495	312.381	324.161	309.989	274.636	p value < 0.0001
21.6638	328.207	357.28	361.829	373.093	338.496	330.66	299.767	320.442	318.568	323.679	313.942	263.353	p value < 0.0001
28.4357	324.567	356.831	362.399	373.576	339.648	326.154	299.326	322.014	309.301	326.128	301.632	263.704	p value < 0.0001
35.2124	324.405	351.227	354.979	366.52	333.495	327.571	309.932	309.53	303.909	310.974	299.637	265.329	p value < 0.0001
42.0363	321.563	347.03	349.301	360.41	328.9	324.857	293.556	305.06	299.9	306.527	297.231	271.942	p value < 0.0001
48.8307	324.623	349.193	351.597	362.164	330.812	328.597	294.058	309.085	303.09	309.016	306.436	262.054	p value < 0.0001
55.6427	326.279	349.03	351.791	362.335	331.122	330.529	295.5	309.522	306.352	316.282	297.379	258.91	p value < 0.0001
62.4495	323.245	351.084	354.751	364.261	332.231	329.353	298.573	301.238	294.459	305.66	292.344	258.565	p value < 0.0001
Time (minutes)	Control						DES
1.352	365.009	375.14	413.72	406.71	377.971	322.137	366.597	359.548	388.887	339.092	303.255	283.217	p value = 0.0108
8.13593	342.443	349.497	388.712	376.034	357.934	310.695	348.181	338.127	365.371	327.666	288.104	272.024	p value = 0.0499
14.9032	339.611	342.727	382.222	368.102	353.521	308.911	342.921	333.67	360.426	326.408	288.421	265.242	p value = 0.0691
21.6638	340.516	341.738	381.136	366.661	351.872	310.391	342.539	333.311	363.497	318.487	280.861	264.424	p value = 0.0433
28.4357	336.265	340.483	379.968	365.157	353.754	308.194	341.998	327.923	357.854	318.315	280.816	266.614	p value = 0.0413
35.2124	335.7	337.558	381.113	367.604	347.916	308.251	337.122	328.385	355.743	319.64	281.924	270.319	p value = 0.0517
42.0363	333.811	332.846	373.383	359.633	343.665	305.751	332.504	324.675	352.49	321.263	280.971	265.314	p value = 0.0885
48.8307	335.299	334.475	374.37	359.436	345.161	308.856	335.022	330.816	356.87	323.12	287.947	265.391	p value = 0.1478
55.6427	338.546	335.281	375.063	359.169	345.644	310.597	336.194	328.44	363.825	317.361	280.567	265.768	p value = 0.0875
62.4495	338.23	335.67	373.739	358.468	346.678	308.761	337.322	323.387	353.078	316.545	279.528	268.016	p value = 0.0547
Time (minutes)	DMSO						AG221
1.352	326.494	366.654	329.188	362.958	328.393	329.841	311.905	339.886	363.764	394.992	373.026	330.256	p value = 0.9523
8.13593	309.275	343.591	310.54	342.811	307.89	317.451	297.944	325.746	345.797	369.476	350.75	315.506	p value = 0.9362
14.9032	304.73	341.246	310.438	338.696	302.978	316.598	293.684	319.015	337.968	361.341	344.749	312.399	p value = 0.9921
21.6638	304.397	334.643	306.898	332.81	298.796	315.182	293.224	318.153	335.703	358.1	342.758	312.104	p value = 0.9641
28.4357	305.726	332.495	306.136	330.409	296.21	315.56	293.968	317.483	333.629	357.36	342.305	313.891	p value = 0.9441
35.2124	306.751	332.239	305.919	328.197	295.282	316.437	294.329	317.134	331.912	355.887	341.915	315.099	p value = 0.9472
42.0363	302.555	328.965	303.671	323.625	292.333	314.325	291.161	312.888	325.707	351.561	336.166	312.025	p value = 0.9744
48.8307	305.129	335.227	305.19	329.057	294.299	318.746	293.257	315.692	327.062	354.296	338.208	314.94	p value = 0.9905
55.6427	305.816	328.037	302.547	323.225	291.674	316.827	294.319	315.77	326.777	353.97	337.477	316.239	p value = 0.9204
62.4495	305.818	325.961	300.371	320.442	290.101	316.074	293.372	313.223	324.903	352.246	335.602	315.659	p value = 0.9216
