# Supplementary material for: Succinate mediates inflammation-induced adrenocortical dysfunction
Source: eLife journal article supplement (doi:10.7554/elife.83064), 2023-07-14
Supplement: supp [file Figure4_SourceData4.xlsx]

## Sheet: Sheet1
Figure 4 - Source Data 4
Figure 4 D: ATP/ADP ratio in NCI-H295R cells treated with DMM or DES
Summary Statistics (arithmetic from GraphPad Prism 7.04)
ATP / ADP ratio
Control	DMM	DES
4.43874	3.48953	3.18736
3.64613	3.84382	3.38688
4.80004	3.54862	2.98999
3.83282	3.29349	3.42057
3.71168	5.29903
15.9087	4.05053
11.1447	3.82771
4.71008	3.20119
3.85651
4.88755
5.52372
4.70566
p value = 0.0201
p value = 0.0011
