# Supplementary material for: Succinate mediates inflammation-induced adrenocortical dysfunction
Source: eLife journal article supplement (doi:10.7554/elife.83064), 2023-07-14
Supplement: supp [file Figure4_SourceData5.xlsx]

## Sheet: Sheet1
Figure 4 - Source Data 5
Figure 4 E, F, K: Mean fluorescence intensity of TMRE and Mitotracker Green staining in NCI-H295R cells treated with DES or AG221
Summary Statistics (arithmetic from GraphPad Prism 7.04)
TMRE (MFI)			Mitotracker Green (MFI)			TMRE (MFI)
Control	DES		Control	DES		DMSO	AG221
1367	1543		2834	1857		1453	1519
1898	1361		2888	3280		1468	1508
1763	1364		3049	2995		1461	1099
1459	1362		2507	2339		1421	2267
1594	1336		p value = 0.8857			1753	1432
1574	1340					1688	1361
1626	1445					1471	1415
p value = 0.0041						p value = 0.4557
