# Supplementary material for: Succinate mediates inflammation-induced adrenocortical dysfunction
Source: eLife journal article supplement (doi:10.7554/elife.83064), 2023-07-14
Supplement: supp [file Figure4_SourceData6.xlsx]

## Sheet: Sheet1
Figure 4 - Source Data 6
Figure 4 G: ROS measurement in NCI-H295R cells treated with DMM or DES
Summary Statistics (arithmetic from GraphPad Prism 7.04)
ROS (fluorescence)
Control	DMM	DES
45	55	51
48	62	56
49	53	44
47	51	47
47	51	52
48	49	45
46	52	61
50	55	55
42	52	47
49	51	48
44	52
	51
p value = 0.0022
p value = 0.0805
