# Supplementary material for: Succinate mediates inflammation-induced adrenocortical dysfunction
Source: eLife journal article supplement (doi:10.7554/elife.83064), 2023-07-14
Supplement: supp [file Figure4_SourceData7.xlsx]

## Sheet: Sheet1
Figure 4 - Source Data 7
Figure 4 H: NADPH/NADP ratio in NCI-H295R cells treated with DMM
Summary Statistics (arithmetic from GraphPad Prism 7.04)
NADPH/NADP+
Control	DMM
2.44238	0.927069
2.99692	1.20083
2.39327	1.47625
	1.16922
p value = 0.0286
