# Supplementary material for: Succinate mediates inflammation-induced adrenocortical dysfunction
Source: eLife journal article supplement (doi:10.7554/elife.83064), 2023-07-14
Supplement: supp [file Figure4_SourceData8.xlsx]

## Sheet: Sheet1
Figure 4 - Source Data 8
Figure 4 I: Isocitrate and a-ketoglutarate measurement in NCI-H295R cells treated with AG221
Summary Statistics (arithmetic from GraphPad Prism 7.04)
Isocitrate (ng / 1,000 cells)			a-ketoglutarate (ng / 1,000 cells)			Isocitrate/a-ketoglutarate ratio
DMSO	AG221		DMSO	AG221		DMSO	AG221
0.0275	0.0272		0.0934	0.0379		0.294709	0.718191
0.0162	0.0208		0.0611	0.0354		0.265367	0.587564
0.0149	0.0246		0.0636	0.0406		0.23425	0.605127
0.0122	0.0334		0.0546	0.0349		0.223213	0.95844
0.0155	0.0401		0.0649	0.0518		0.238555	0.774099
0.0149	0.0218		0.0679	0.0348		0.21901	0.627164
p value = 0.0238						p value = 0.0022
