# Supplementary material for: Succinate mediates inflammation-induced adrenocortical dysfunction
Source: eLife journal article supplement (doi:10.7554/elife.83064), 2023-07-14
Supplement: supp [file Figure5-Suppl1_SourceData1.xlsx]

## Sheet: Sheet1
Figure 5 - figure supplement 1 - Source Data 1
Figure 5 - figure supplement 1 A, B: Cortisol and 11-deoxycortisol measurement in NCI-H295R cells treated with DMM or DES and Forskolin
Summary Statistics (arithmetic from GraphPad Prism 7.04)
Cortisol (ng / mL)							11-deoxycortisol (ng / mL)
Control	Fsk	DMM	DMM + Fsk	DES	DES + Fsk		Control	Fsk	DMM	DMM + Fsk	DES	DES + Fsk
5.588	36.675	5.753	26.731	0	13.771		158	273.2	155.1	225.7	115.9	233
6.211	27.149	5.849	23.469	0	15.025		170	233.3	154.9	226	101.2	211.8
5.326	33.606	5.653	20.048	0	17.028		156	244.9	145.7	215.6	104.4	234.8
6.113	31.973	6.096	23.628	0	14.469		166.8	242.3	151.6	237.4	109.8	225.1
5.505	32.623	5.694	21.731	0	12.478		162.7	258.5	158.8	224.6	108.2	207.2
6.564	29.685	6.145	27.208	0	13.579		174.5	263.2	167	250.1	112.7	222.6
5.849	29.539						163.2	252.4
5.675	28.93						167.4	252
5.679	30.058						166.3	263.9
5.768	31.195						166.2	259.5
5.883	28.651						168.2	263.6
5.491	30.409						163	266.9
p value < 0.0001							p value < 0.0001
	p value < 0.0001							p value < 0.0001
	p value < 0.0001							p value < 0.0001
