# Supplementary material for: Succinate mediates inflammation-induced adrenocortical dysfunction
Source: eLife journal article supplement (doi:10.7554/elife.83064), 2023-07-14
Supplement: supp [file Figure5-Suppl1_SourceData2.xlsx]

## Sheet: Sheet1
Figure 5 - figure supplement 1 - Source Data 2
Figure 5 - figure supplement 1 C: Cortisol measurement in NCI-H295R cells transfected with siSDHB (or siCtrl) and treated with Forskolin
Summary Statistics (arithmetic from GraphPad Prism7.04)
siCtrl	siCtrl+Fsk	siSDHB	siSDHB+Fsk
0	23.94	0	22.58
0	24.55	0	17.94
0	24.53	0	19.66
0	24.26	0	21.97
	p value = 0.0016
