# Supplementary material for: Succinate mediates inflammation-induced adrenocortical dysfunction
Source: eLife journal article supplement (doi:10.7554/elife.83064), 2023-07-14
Supplement: supp [file Figure5-Suppl1_SourceData3.xlsx]

## Sheet: Sheet1
Figure 5 - figure supplement 1 - Source Data 13
Figure 5 - figure supplement 1 D, E, F: Cortisol, 11-deoxycortisol and progesterone measurement in NCI-H295R cells treated with DES and Forskolin
Summary Statistics (arithmetic from GraphPad Prism 7.04)
Cortisol (ng / mL)
mM DES	Control				Forskolin
0	0	0	0	0	14.44	13.35	16.17	12.81	p value > 0.9999	p value = 0.8168	p value = 0.0002	p value < 0.0001
0.5	0	0	0	0	14.33	14.77	12.28	15.6
1	0	0	0	0	14.24	14.36	13.48	12.39
5	0	0	0	0	13.55	11.08	10.35	10.53
20	0	0	0	0	0	0	0	0
11-deoxycortisol (ng / mL)
mM DES	Control				Forskolin
0	130.85	119.37	141.45	144.69	327.2	356.88	360.04	287.57	p value = 0.9505	p value = 0.7901	p value = 0.9381	p value < 0.0001
0.5	106.15	110.55	113.27	106.02	315.5	340.38	339.66	380.16
1	107.71	94.88	100.82	119.98	283.1	322.61	325.15	331.53
5	95.35	74.25	87.71	78.19	353.73	304.94	319.04	307.02
20	41.95	34.98	40.16	40.24	148.52	138.61	55.44	50.8
Progesterone (ng / mL)
mM DES	Control				Forskolin
0	0.17	0.2	0.21	0.23	2.47	2.18	2.24	1.92	p value < 0.0001	p value < 0.0001	p value < 0.0001	p value < 0.0001
0.5	0.2	0.19	0.23	0.21	1.6	1.57	1.65	1.83
1	0.24	0.26	0.21	0.25	1.81	1.47	1.24	1.15
5	0.2	0.15	0.17	0.15	1.4	1.2	1.02	0.99
20	0.33	0.37	0.47	0.27	0.64	0.67	0.69	0.34
