# Supplementary material for: Succinate mediates inflammation-induced adrenocortical dysfunction
Source: eLife journal article supplement (doi:10.7554/elife.83064), 2023-07-14
Supplement: supp [file Figure5-Suppl1_SourceData4.xlsx]

## Sheet: Sheet1
Figure 5 - figure supplement 1 - Source Data 4
Figure 5 - figure supplement 1 G: Corticosterone/11-deoxycorticosterone ratio in primary adrenocortical cells transfected with siSdhb (or siCtrl) and stimulated with ACTH
Summary Statistics (arithmetic from GraphPad Prism 7.04)
si Ctrl	si Sdhb
5.41624	4.63074
3.43217	3.82656
2.76729	3.16464
6.61529	5.15388
3.15916	3.69938
4.71812	3.58256
4.55516	4.27907
2.4777	2.74844
p value = 0.9591
