# Supplementary material for: Succinate mediates inflammation-induced adrenocortical dysfunction
Source: eLife journal article supplement (doi:10.7554/elife.83064), 2023-07-14
Supplement: supp [file Figure5-Suppl1_SourceData5.xlsx]

## Sheet: Sheet1
Figure 5 - figure supplement 1 - Source Data 5
Figure 5 - figure supplement 1 H: Corticosterone/11-deoxycorticosterone ratio in adrenal gland explants treated with LPS and stimulated with ACTH
Summary Statistics (arithmetic from GraphPad Prism 7.04)
Control	LPS
4.0069	1.96955
3.69288	3.56896
2.33366	4.87575
4.33621	3.62118
p value = 0.6857
