# Supplementary material for: Succinate mediates inflammation-induced adrenocortical dysfunction
Source: eLife journal article supplement (doi:10.7554/elife.83064), 2023-07-14
Supplement: supp [file Figure5-Suppl2_SourceData2.xlsx]

## Sheet: Sheet1
Figure 5 - figure supplement 2 - Source Data 2
Figure 5 - figure supplement 2 B, C: Sdhb and Idh2 expression in primary adrenocortical cells transfected with siSdhb or siIdh2 (or siCtrl)
Summary Statistics (arithmetic from GraphPad Prism 7.04)
siRNA conc	si Sdhb			si Ctrl
10 nM	0.72	0.72	0.48	0.94	1.13	0.94	p value = 0.0020
30 nM	0.38	0.35	0.3	1.1	0.92	1	p value < 0.0001
50 nM	0.46	0.43	0.34	0.99	1.12	0.9	p value < 0.0001
siRNA conc	si Idh2			si Ctrl
10 nM	0.58	0.26	0.42	1.2	1.03	0.81	p value = 0.0124
30 nM	0.38	0.27	0.19	1.05	1.09	0.88	p value = 0.003
50 nM	0.5	1.14	0.63	1.21	1.09	0.76	p value = 0.3737
