# Supplementary material for: Succinate mediates inflammation-induced adrenocortical dysfunction
Source: eLife journal article supplement (doi:10.7554/elife.83064), 2023-07-14
Supplement: supp [file Figure5-Suppl2_SourceData3.xlsx]

## Sheet: Sheet1
Figure 5 - figure supplement 2 - Source Data 3
Figure 5 - figure supplement 2 D: Dnmt1 expression in primary adrenocortical cells transfected with siDnmt1 (or siCtrl)
Summary Statistics (arithmetic from GraphPad Prism 7.04)
siCtrl	siCtrl+IL-1b	siDnmt1+IL-1b
0.88	0.56
1.05	0.67	0.58
0.54	1.42	0.21
0.97	1.77	0.62
1.58	0.91	0.03
1.31	1.12	0.25
	p value = 0.015
p value = 0.0178
