# Supplementary material for: Succinate mediates inflammation-induced adrenocortical dysfunction
Source: eLife journal article supplement (doi:10.7554/elife.83064), 2023-07-14
Supplement: supp [file Figure5-Suppl2_SourceData4.xlsx]

## Sheet: Sheet1
Figure 5 - figure supplement 2 - Source Data 4
Figure 5 - figure supplement 2 E: DNMT1 expression in NCI-H295R cells transfected with siDNMT1 (or siCtrl)
siCtrl	siDNMT1
1.03	0.49
1.1	0.6
