# Supplementary material for: Succinate mediates inflammation-induced adrenocortical dysfunction
Source: eLife journal article supplement (doi:10.7554/elife.83064), 2023-07-14
Supplement: supp [file Figure5-Suppl3_SourceData1.xlsx]

## Sheet: Sheet1
Figure 5 - figure supplement 3 - Source Data 1
Figure 5 - figure supplement 3 A, B: Corticosterone and 11-deoxycorticosterone measurement in primary adrenocortical cells treated with AG221 and ACTH
Summary Statistics (arithmetic from GraphPad Prism 7.04)
Corticosterone (ng / mL)					11-deoxycorticosterone (ng / mL)
DMSO	AG221	ACTH	AG221+ACTH		DMSO	AG221	ACTH	AG221+ACTH
3.12	4.1	70.685	66.65		0.23	0.48	11.51	11.63
6.495	9.575	52.63	52.44		0.46	0.765	7.945	9.19
		94.85	91.525				13.345	13.865
		70.24	72.375				17.405	22.6
		80.8	66.305				22.69	21.975
		102.415	71.715				20.105	15.535
		p value = 0.7421					p value = 0.9996
