# Supplementary material for: Succinate mediates inflammation-induced adrenocortical dysfunction
Source: eLife journal article supplement (doi:10.7554/elife.83064), 2023-07-14
Supplement: supp [file Figure5-Suppl3_SourceData2.xlsx]

## Sheet: Sheet1
Figure 5 - figure supplement 3 - Source Data 2
Figure 5 - figure supplement 3 C, D: Corticosterone and 11-deoxycorticosterone measurement in adrenal gland explants treated with AG221 and ACTH
Summary Statistics (arithmetic from GraphPad Prism 7.04)
Corticosterone (ng / mL)					11-deoxycorticosterone (ng / mL)
DMSO	DMSO+ACTH	AG221	AG221+ACTH		DMSO	DMSO+ACTH	AG221	AG221+ACTH
9.825	46.7	58.7	123.6		2.364	2.958	6.675	6.892
	48.1	76.8	85.3			8.406	7.022	9.656
	42.8		85.7			9.539		15.464
	210.9		41.4			20.789		8.533
	p value = 0.9998					p value = 0.9998
