# Supplementary material for: Succinate mediates inflammation-induced adrenocortical dysfunction
Source: eLife journal article supplement (doi:10.7554/elife.83064), 2023-07-14
Supplement: supp [file Figure5-Suppl3_SourceData3.xlsx]

## Sheet: Sheet1
Figure 5 - figure supplement 3 - Source Data 3
Figure 5 - figure supplement 3 E, F: Cortisol and 11-deoxycortisol measurement in NCI-H295R cells treated with AG221 and Forskolin
Summary Statistics (arithmetic from GraphPad Prism 7.04)
Cortisol (ng / mL)					11-deoxycortisol (ng / mL)
DMSO	DMSO+Fsk	AG221	AG221+Fsk		DMSO	DMSO+Fsk	AG221	AG221+Fsk
0	14.1	0	16.79		107.1	201.8	116.5	191.7
0	13.35	0	17.96		108.3	197.7	113.5	201.2
0	12.63	0	17.88		110.4	204.8	112.9	200.7
0	13.06	0	16.28		110.7	188.1	112.5	192.5
	p value < 0.0001				109.8		108.3
					114.9		122.5
					p value < 0.0001
						p value = 0.9681
