# Supplementary material for: Succinate mediates inflammation-induced adrenocortical dysfunction
Source: eLife journal article supplement (doi:10.7554/elife.83064), 2023-07-14
Supplement: supp [file Figure5-Suppl3_SourceData4.xlsx]

## Sheet: Sheet1
Figure 5 - figure supplement 3 - Source Data 4
Figure 5 - figure supplement 3 G, H: Corticosterone and 11-deoxycorticosterone measurement in primary adrenocortical cells transfected with siIdh2 (or siCtrl) and treated with ACTH
Summary Statistics (arithmetic from GraphPad Prism 7.04)
Corticosterone (ng / mL)					11-deoxycorticosterone (ng / mL)
si Ctrl	si Ctrl + ACTH	si Idh2	si Idh2 + ACTH		si Ctrl	si Ctrl + ACTH	si Idh2	si Idh2 + ACTH
3.52	9.35	0.665	9.093		0.93	3.94	0.26	4.246
4.195	13.605	5.905	3.44		0.66	4.835	1.06	2.105
	5.025		6.693			3.675		3.821
	10.66		6.03			2.735		2.49
	15.475		10.51			6.965		6.32
	9.5		9.73			4.095		3.695
	9.825		8.93			5.87		5.43
	p value = 0.338					p value = 0.8604
