# Supplementary material for: Succinate mediates inflammation-induced adrenocortical dysfunction
Source: eLife journal article supplement (doi:10.7554/elife.83064), 2023-07-14
Supplement: supp [file Figure5-Suppl4_SourceData1.xlsx]

## Sheet: Sheet1
Figure 5 - figure supplement 4 - Source Data 1
Figure 5 - figure supplement 4 A: Irg1 expression in CD31-CD45- and CD45+ cells from PBS- and LPS-mice
Summary Statistics (arithmetic from GraphPad Prism 7.04)
	PBS							LPS
CD31-CD45-	0.02	0.07	0.15	0.13				0.09	0.16	0.08	0.08	0.01	0.12	0.13		p value = 0.9788
CD45+	1.05	0.94	0.77	0.74	0.46	0.71	1.84	5.89	1.53	7.82	2.33	10.99	7.99	7.77	6.01	p value = 0.0006
