# Supplementary material for: Succinate mediates inflammation-induced adrenocortical dysfunction
Source: eLife journal article supplement (doi:10.7554/elife.83064), 2023-07-14
Supplement: supp [file Figure5-Suppl4_SourceData2.xlsx]

## Sheet: Sheet1
Figure 5 - figure supplement 4 - Source Data 2
Figure 5 - figure supplement 4 B, C: Itaconate measurement in CD31-CD45- and CD31+CD45+ cells from PBS- and LPS-mice
Summary Statistics (arithmetic from GraphPad Prism 7.04)
Itaconate (ng/mL)			Itaconate (ng/mL)
CD31-CD45- cells			CD31+CD45+ cells
PBS	LPS		PBS	LPS
0	1.16		0.44	28.13
0.14	0.33		0.23	20.12
0.41	0.59		0.31	27.29
0.45	0.27		0.45	18.35
0.73	1.27		3.17	14.65
1.62	0.83		3.54	27.95
1.92	1.78		2.97	26.54
1.68	1.07		1.23	32.17
p value = 0.7984			p value = 0.0002
