# Supplementary material for: Succinate mediates inflammation-induced adrenocortical dysfunction
Source: eLife journal article supplement (doi:10.7554/elife.83064), 2023-07-14
Supplement: supp [file Figure5-Suppl4_SourceData3.xlsx]

## Sheet: Sheet1
Figure 5 - figure supplement 4 - Source Data 3
Figure 5 - figure supplement 4 D, E, F; G: Itaconate, succinate and fumarate measurement in primary adrenocortical cells treated with 4OI
Summary Statistics (arithmetic from GraphPad Prism 7.04)
Itaconate (ng / mL)			Succinate (ng / mL)			Fumarate (ng / mL)			Succinate / Fumarate ratio
Control	4OI		Control	4OI		Control	4OI		Control	4OI
3.09	6.34		14.67	20.8		5.31	5.77		2.76	3.6
1.4	5.04		10.53	18.25		3.83	3.79		2.75	4.82
3.05	3.71		18.34	17.33		4.07	5.38		4.51	3.22
2.37	4.72		17.32	16.85		6.49	4.36		2.67	3.87
p value = 0.0286			p value = 0.3429						p value = 0.2000
