# Supplementary material for: Succinate mediates inflammation-induced adrenocortical dysfunction
Source: eLife journal article supplement (doi:10.7554/elife.83064), 2023-07-14
Supplement: supp [file Figure5-Suppl4_SourceData4.xlsx]

## Sheet: Sheet1
Figure 5 - figure supplement 4 - Source Data 4
Figure 5 - figure supplement 4 H, I: Corticosterone and 11-deoxycorticosterone measurement in primary adrenocortical cells treated with 4OI
Summary Statistics (arithmetic from GraphPad Prism 7.04)
Corticosterone (ng / mL)			11-deoxycorticosterone (ng / mL)
Control	4OI		Control	4OI
33.6	57.428		3.79	3.038
23.013	32.405		2.743	2.553
35.858	53.13		4.56	2.708
17.393	21.24		2.393	1.518
p value = 0.4857			p value = 0.3429
