# Supplementary material for: Succinate mediates inflammation-induced adrenocortical dysfunction
Source: eLife journal article supplement (doi:10.7554/elife.83064), 2023-07-14
Supplement: supp [file Figure5-Suppl4_SourceData5.xlsx]

## Sheet: Sheet1
Figure 5 - figure supplement 4 - Source Data 5
Figure 5 - figure supplement 4 J: SDH activity in adrenal cortex of Irg1-KO and WT mice treated with LPS
Summary Statistics (arithmetic from GraphPad Prism 7.04)
SDH activity (nmol/min/mL)
WT	Irg1-KO
0.0403	0.062
0.0348	0.113
0.0418	0.0397
0.0465	0.0535
0.0337	0.0445
0.0522
p value = 0.1255
