# Supplementary material for: Succinate mediates inflammation-induced adrenocortical dysfunction
Source: eLife journal article supplement (doi:10.7554/elife.83064), 2023-07-14
Supplement: supp [file Figure5_SourceData1.xlsx]

## Sheet: Sheet1
Figure 5 - Source Data 1
Figure 5 A, B: Corticosterone and progesterone measurement in primary adrenocortical cells treated with DMM or DES and ACTH
Summary Statistics (arithmetic from GraphPad Prism 7.04)
Corticosterone (ng / mL)							Progesterone (ng / mL)
Control	ACTH	DMM	DMM+ACTH	DES	DES+ACTH		Control	ACTH	DMM	DMM+ACTH	DES	DES+ACTH
1.38	2.835	1.34	2.275	0.835	1.98		0	0.255	0	0.125	0	0.095
1.35	5.58	1.205	3.535	0.6	2.305		0	0.28	0	0.155	0	0.105
2.343	4.395	2.01	3.14	1.175	2.91		0	0.38	0	0.125	0	0.13
1.057	2.78	0.96	1.14	0.65	1.085		0	0.22	0	0.13	0	0.135
1.379	3.205	0.935	1.685	0.7	1.325		0	0.35	0	0.26	0	0.135
1.05		0.93	1.925	0.635	0.515		0	0.215	0	0.07	0	0
p value = 0.0002								p value < 0.0001
	p value = 0.0292							p value < 0.0001
	p value = 0.0010
