# Supplementary material for: Succinate mediates inflammation-induced adrenocortical dysfunction
Source: eLife journal article supplement (doi:10.7554/elife.83064), 2023-07-14
Supplement: supp [file Figure5_SourceData2.xlsx]

## Sheet: Sheet1
Figure 5 - Source Data 2
Figure 5 C, D, E: Corticosterone, 11-deoxycorticosterone and progesterone measurement in adrenal explants treated with DMM and ACTH
.
Summary Statistics (arithmetic from GraphPad Prism 7.04)
Corticosterone (ng / mL)					11-deoxycorticosterone (ng / mL)					Progesterone (ng / mL)
Control	ACTH	DMM	DMM+ACTH		Control	ACTH	DMM	DMM+ACTH		Control	ACTH	DMM	DMM+ACTH
34.225	82.378	16.089	22.892		8.747	29.322	2.933	3.833		0.594	2.717	0.283	0.419
22.936	51.803	9.464	29.889		6.028	17.275	2.539	4.986		0.458	1.511	0.367	0.383
12.622	45.15	18.456	41.178		3.219	14.464	3.783	6.247		0.3	1.167	0.3	0.408
21.944	72.322	42.086	61.392		4.992	16.072	7.036	6.422		0.35	1.203	0.539	0.392
23.853	76.742	49.608	60.247		5.961	22.153	14.072	7.994		0.367	2.442	1.283	0.442
p value = 0.0023					p value = 0.0003					p value = 0.0004
	p value = 0.1324					p value = 0.0003					p value = 0.0004
