# Supplementary material for: Succinate mediates inflammation-induced adrenocortical dysfunction
Source: eLife journal article supplement (doi:10.7554/elife.83064), 2023-07-14
Supplement: supp [file Figure5_SourceData3.xlsx]

## Sheet: Sheet1
Figure 5 - Source Data 3
Figure 5 F, G, H: Corticosterone, 11-deoxycorticosterone and progesterone measurement in primary adrenocortical cells transfected with siSdhb (or siCtrl) and treated with ACTH
Summary Statistics (arithmetic from GraphPad Prism 7.04)
Corticosterone (ng / mL)					11-deoxycorticosterone (ng / mL)					Progesterone (ng / mL)
si Ctrl	si Ctrl + ACTH	si Sdhb	si Sdhb + ACTH		si Ctrl	si Ctrl + ACTH	si Sdhb	si Sdhb + ACTH		si Ctrl	si Ctrl + ACTH	si Sdhb	si Sdhb + ACTH
75.55	258.49	85.49	217.89		2.285	47.725	1.87	47.053		0.556	3.269	0.881	3.073
145.24	134.85	100.45	120.02		2.3	39.29	1.54	31.365			1.866		2.042
77.6	116.24	30.09	101.68		1.19	42.005	1.05	32.13			4.134		3.672
	218.9		135.65			33.09		26.32			4.281		2.431
	105.99		80.48			33.55		21.755			3.819		1.919
	212.41		142.55			45.02		39.79			3.269		1.797
	285.95		208.07			62.775		48.625			1.991		1.688
	126.92		118.65			36.96		30.965			p value = 0.0313
						51.225		43.17
	p value = 0.0078				p value < 0.0001
						p value = 0.0039
