# Supplementary material for: Succinate mediates inflammation-induced adrenocortical dysfunction
Source: eLife journal article supplement (doi:10.7554/elife.83064), 2023-07-14
Supplement: supp [file Figure5_SourceData4.xlsx]

## Sheet: Sheet1
Figure 5 - Source Data 4
Figure 5 I, J: Progesterone measurement in NCI-H295R cells treated with FCCP or oligomycin and Forskolin
Summary Statistics (arithmetic from GraphPad Prism 7.04)
Progesterone (ng / mL)					Progesterone (ng / mL)
Control	Fsk	FCCP	FCCP+Fsk		Control	Fsk	OM	OM+Fsk
0.181	0.556	0.137	0.228		0.184	0.713	0.127	0.243
0.149	0.621	0.119	0.272		0.168	0.602	0.111	0.434
0.186	0.682	0.14	0.258		0.168	0.791	0.102	0.514
0.197	1.269	0.133	0.376		0.182	1.107	0.102	0.427
0.267	0.599	0.216	0.285		0.248	0.408	0.182	0.336
0.271	0.38	0.217	0.261		0.231	0.396	0.202	0.336
p value = 0.0002					p value < 0.0001
	p value = 0.0013					p value = 0.0123
