# Supplementary material for: Succinate mediates inflammation-induced adrenocortical dysfunction
Source: eLife journal article supplement (doi:10.7554/elife.83064), 2023-07-14
Supplement: supp [file Figure5_SourceData5.xlsx]

## Sheet: Sheet1
Figure 5 - Source Data 5
Figure 5 K, L, M: Corticosterone, 11-deoxycorticosterone and progesterone measurement in primary adrenocrtical cells treated with oligomycin and ACTH
Summary Statistics (arithmetic from GraphPad Prism 7.04)
Corticosterone (ng / mL)					11-deoxycorticosterone (ng / mL)					Progesterone (ng / mL)
Control	ACTH	OM	OM+ACTH		Control	ACTH	OM	OM+ACTH		Control	ACTH	OM	OM+ACTH
0.725	2.05	0.645	0.825		0.14	1.575	0.24	0.3		0	0.12	0	0
1.095	1.515	0.49	0.565		0.245	1.46	0.13	0.245		0	0.145	0	0
0.88	1.73	0.61	0.665		0.185	1.41	0.25	0.26		0	0.09	0	0
0.815	1.465	0.515	0.575		0.185	1.265	0.16	0.215		0	0.095	0	0
0.875	1.41	0.575	0.635		0.175	1.23	0.19	0.23		0	0.08	0	0
0.63	2.425	0.875	0.93		0.125	1.765	0.34	0.33		0	0.13	0	0
p value < 0.0001					p value < 0.0001
	p value < 0.0001					p value < 0.0001
