# Supplementary material for: Succinate mediates inflammation-induced adrenocortical dysfunction
Source: eLife journal article supplement (doi:10.7554/elife.83064), 2023-07-14
Supplement: supp [file Figure5_SourceData6.xlsx]

## Sheet: Sheet1
Figure 5 - Source Data 6
Figure 5 N: ROS measurement in NCI-H295R cells treated with Trolox and DMM
Summary Statistics (arithmetic from GraphPad Prism 7.04)
ROS (fluorescence)
Control	Trolox	DMM	DMM+Trolox
59	50	60	58
59	54	63	55
58	56	71	57
p value =0.0500
p value =0.0500
		p value = 0.0500
