# Supplementary material for: Succinate mediates inflammation-induced adrenocortical dysfunction
Source: eLife journal article supplement (doi:10.7554/elife.83064), 2023-07-14
Supplement: supp [file Figure5_SourceData7.xlsx]

## Sheet: Sheet1
Figure 5 - Source Data 7
Figure 5 O, P: Cortisol and 11-deoxycortisol measurement in NCI-H295R cells treated with Trolox, DMM and Forskolin
Summary Statistics (arithmetic from GraphPad Prism 7.04)
Cortisol (ng / mL)						11-deoxycortisol (ng / mL)
No FSK	Ctrl	DMM	Trolox	DMM+Trolox		No FSK	Ctrl	DMM	Trolox	DMM+Trolox
5.167	89.89	30.07	85.657	45.633		233.07	418.613	252.207	402.8	335.087
5.217	93.64	29.06	84.687	39.967		270.56	369.063	276.327	504.403	368.25
5.18	91.673	26.707	79.153	36.587		259.877	441.327	290.037	415.04	316.243
4.927	87.53	27.773	73	39.423		277.757	434.297	318.173	440.773	337.413
5.173	88.197	30.343	86.647	39.39		208.063	393.03	251.017	476.157	336.1
4.773	82.947	8.057	60.21	43.87		252.317	288.403	145.58	330.147	314.253
	p value = 0.0022						p value = 0.0005
		p value = 0.0022						p value = 0.0087
