# Supplementary material for: Succinate mediates inflammation-induced adrenocortical dysfunction
Source: eLife journal article supplement (doi:10.7554/elife.83064), 2023-07-14
Supplement: supp [file Figure5_SourceData8.xlsx]

## Sheet: Sheet1
Figure 5 - Source Data 8
Figure 5 Q, R: Cyp11a1 and Cyp11b1 expression in primary adrenocortical cells treated with DMM or DES and ACTH
Summary Statistics (arithmetic from GraphPad Prism 7.04)
Cyp11a1							Cyp11b1
Control	ACTH	DMM	DMM+ACTH	DES	DES+ACTH		Control	ACTH	DMM	DMM+ACTH	DES	DES+ACTH
1.18	1.22	0.14	0.51	1.12	0.74		0.83	1.33	0.73	0.71	1.34	0.62
1.07	0.99	0.41	0.43	0.65	0.6		1.23	1.05	0.42	0.54	0.86	0.54
0.95	1.02	0.69	0.22	0.58	0.91		0.94	0.64	0.91	0.37	0.74	0.68
1.22	1.11	0.39	0.7	0.48	0.3		1.12	0.92	0.39	0.34	0.46	0.37
0.9	0.84	0.21	0.3	0.38	0.37		0.82	0.58	0.38	0.22	0.34	0.28
0.75	0.78	0.28	0.4	0.46	0.8		1.14	0.72	0.18		0.45	0.32
	p value = 0.0022							p value = 0.0173
	p value = 0.0152							p value = 0.0152
