# Supplementary material for: Succinate mediates inflammation-induced adrenocortical dysfunction
Source: eLife journal article supplement (doi:10.7554/elife.83064), 2023-07-14
Supplement: supp [file Figure5_SourceData9.xlsx]

## Sheet: Sheet1
Figure 5 - Source Data 9
Figure 5 S: Corticosterone measurement in adrenal gland explants treated with LPS and ACTH
Summary Statistics (arithmetic from GraphPad Prism 7.04)
Control	ACTH	LPS	LPS + ACTH
27.839	69.119	9.219	42.231
15.733	55.589	23.931	56.022
13.875	76.369	12.114
10.742	72.367	10.303	50.464
12.222		7.783	50.233
p value < 0.0001		p value < 0.0001
	p value = 0.0105
