# Supplementary material for: Succinate mediates inflammation-induced adrenocortical dysfunction
Source: eLife journal article supplement (doi:10.7554/elife.83064), 2023-07-14
Supplement: supp [file Figure6_SourceData1.xlsx]

## Sheet: Sheet1
Figure 6 - Source Data 1
Figure 6 B: Il-1r1 expression in CD31-CD45- cells of PBS- and LPS-mice
Summary Statistics (arithmetic from GraphPad Prism 7.04)
PBS	LPS
1.16	2.35
1.43	3.28
1.15	3.85
0.31	2.67
1.4	3.26
1.23	3.37
p value = 0.0022
