# Supplementary material for: Succinate mediates inflammation-induced adrenocortical dysfunction
Source: eLife journal article supplement (doi:10.7554/elife.83064), 2023-07-14
Supplement: supp [file Figure6_SourceData2.xlsx]

## Sheet: Sheet1
Figure 6 - Source Data 2
Figure 6 D: SDHB expression in NCI-H295R cells treated with IL-1b, IL-6 or TNFa
Summary Statistics (arithmetic from GraphPad Prism 7.04)
Control	IL-1b	IL-6	TNFa
0.9705	0.7301	1.1641	0.7505
1.0475	0.7065	0.9745	0.9864
1.3814	0.8745	1.2229	1.2374
0.9234	0.8848	0.9243	1.3722
0.8733	0.8444	0.9599	1.3357
0.8831	0.7458	0.7977
p value = 0.0152
