# Supplementary material for: Succinate mediates inflammation-induced adrenocortical dysfunction
Source: eLife journal article supplement (doi:10.7554/elife.83064), 2023-07-14
Supplement: supp [file Figure6_SourceData3.xlsx]

## Sheet: Sheet1
Figure 6 - Source Data 3
Figure 6 E: ATP/ADP ratio in NCI-H295R cells treated with IL-1b
Summary Statistics (arithmetic from GraphPad Prism 7.04)
Control	IL-1β
28	3.8
21	4.6
4.33333	1.66667
3.1	4
11.5	1.8
	7
p value = 0.0274
