# Supplementary material for: Succinate mediates inflammation-induced adrenocortical dysfunction
Source: eLife journal article supplement (doi:10.7554/elife.83064), 2023-07-14
Supplement: supp [file Figure6_SourceData4.xlsx]

## Sheet: Sheet1
Figure 6 - Source Data 4
Figure 6 F, G, H: Corticosterone, 11-deoxycorticosterone and progesterone measurement in primary adrenocortical cells treated with IL-1b										and ACTH
Summary Statistics (arithmetic from GraphPad Prism 7.04)
Corticosterone (ng / mL)			11-deoxycorticosterone (ng / mL)			Progesterone (ng / mL)
ACTH	ACTH+IL-1b		ACTH	ACTH+IL-1b		ACTH	ACTH+IL-1b
3.39	3.61		0.89	1.255		0.115	0.16
2.925	1.27		0.82	0.375		0.1	0.055
1.515	1.31		0.435	0.4		0.085	0.06
1.355	1.205		0.355	0.365		0.08	0.09
1.425	1.12		0.38	0.275		0.065	0.07
4.175	2.8		1.045	0.765		0.125	0.11
19.589	9.925		7.767	8.09		0.561	0.495
20.095	15.01		9.605	4.6		0.49	0.33
22.93	6.27		10.085	6.85		0.57	0.46
7.92	6.5		4.305	3.1		0.28	0.195
8.695	6.61		3.96	2.95		0.265	0.2
9.99			4.845	3.075		0.285	0.19
p value = 0.0049			p value = 0.0342			p value = 0.0132
