# Supplementary material for: Succinate mediates inflammation-induced adrenocortical dysfunction
Source: eLife journal article supplement (doi:10.7554/elife.83064), 2023-07-14
Supplement: supp [file Figure6_SourceData5.xlsx]

## Sheet: Sheet1
Figure 6 - Source Data 5
Figure 6 I: DNMT1 measurement in CD31-CD45- cells of PBS- and LPS-mice
Summary Statistics (arithmetic from GraphPad Prism 7.04)
DNMT1 (relative intensity)
PBS	LPS
0.7575	1.35766
0.520118	0.957578
0.589777	1.44755
0.968881	1.04524
p value = 0.0286
