# Supplementary material for: Succinate mediates inflammation-induced adrenocortical dysfunction
Source: eLife journal article supplement (doi:10.7554/elife.83064), 2023-07-14
Supplement: supp [file Figure6_SourceData6.xlsx]

## Sheet: Sheet1
Figure 6 - Source Data 6
Figure 6 J: Ratio of methylated to unmethylated SDHB promoter after bisulfite conversion in NCI-H295R cells treated with IL-1b
Summary Statistics (arithmetic from GraphPad Prism 7.04)
Methylated/Unmethylated DNA
Control	IL-1b
0.86991	1.2146
1.11763	1.63317
1.12288	1.51935
0.981272	1.19556
p value = 0.0286
