# Supplementary material for: Succinate mediates inflammation-induced adrenocortical dysfunction
Source: eLife journal article supplement (doi:10.7554/elife.83064), 2023-07-14
Supplement: supp [file Figure6_SourceData7.xlsx]

## Sheet: Sheet1
Figure 6 - Source Data 7
Figure 6 K: Ratio of methylated to unmethylated SDHB promoter after bisulfite conversion in NCI-H295R cells transfected with siDNMT1 and treated with IL-1b
Summary Statistics (arithmetic from GraphPad Prism 7.04)
Methylated/Unmethylated DNA
si Ctrl	si Ctrl+IL-1β	si DNMT1+IL-1β
0.992761	1.05561	1.0034
0.791144	1.08619	0.951717
		1.00988
	p value = 0.026
