# Supplementary material for: Succinate mediates inflammation-induced adrenocortical dysfunction
Source: eLife journal article supplement (doi:10.7554/elife.83064), 2023-07-14
Supplement: supp [file Figure6_SourceData8.xlsx]

## Sheet: Sheet1
Figure 6 - Source Data 8
Figure 6 L: Sdhb expression in primary adrenocortical cells transfected with siDnmt1 (or siCtrl) and treated with IL-1b
Summary Statistics (arithmetic from GraphPad Prism 7.04)
si Ctrl	siCtrl+IL-1β	siDNMT1+IL-1β
1.22	0.99	1.41
0.96	0.39	0.93
1.66	1.01	1.52
1.11	0.84	0.88
0.88	0.82	0.71
1.69	0.62	1.06
0.83	0.59	1.24
0.84	0.85	1.14
p value = 0.0156
	p value = 0.0234
