# Supplementary material for: Succinate mediates inflammation-induced adrenocortical dysfunction
Source: eLife journal article supplement (doi:10.7554/elife.83064), 2023-07-14
Supplement: supp [file Figure6_SourceData9.xlsx]

## Sheet: Sheet1
Figure 6 - Source Data 9
Figure 6 M: Succinate and fumarate measurement in primary adrenocortical cells transfected with siDnmt1 (or siCtrl) and treated with IL-1b
Summary Statistics (arithmetic from GraphPad Prism 7.04)
Succinate / fumarate ratio
si Ctrl	siCtrl+IL-1β	siDNMT1+IL-1β
6.9	8.4	6.3
7.1	7.4	5.5
8.4	8.6	5.9
8.6	9.9	9
p value = 0.0454
	p value = 0.0074
