# Supplementary material for: Succinate mediates inflammation-induced adrenocortical dysfunction
Source: eLife journal article supplement (doi:10.7554/elife.83064), 2023-07-14
Supplement: supp [file Figure6_SourceData10.xlsx]

## Sheet: Sheet1
Figure 6 - Source Data 10
Figure 6 N: Basal OCR measurement in NCI-H295R cells transfected with siDNMT1 (or siCtrl) and treated with IL-1b
Summary Statistics (arithmetic from GraphPad Prism 7.04)
Time (minutes)	siCtrl								siCtrl + IL-1b
1.30189	501.328	464.713	460.008	444.766	488.187	479.25	461.668	476.695	429.278	462.617	477.136	429.409	437.979	447.864	471.509	448.074	p value = 0.065
7.71441	458.951	437.995	431.634	421.786	446.901	451.18	442.109	437.351	396.393	427.094	434.243	427.417	411.535	415.368	429.304	420.153	p value = 0.0030
14.1267	444.999	437.449	421.447	419.83	433.86	443.127	433.262	430.695	392.839	418.651	426.543	431.476	403.09	409.06	419.804	412.233	p value = 0.0030
20.537	442.515	441.108	422.283	421.626	434.439	446.086	434.781	432.661	392.856	416.815	429.339	436.826	404.435	402.655	422.485	411.811	p value = 0.0148
26.9483	441.85	440.671	424.025	422.047	434.25	451.176	436.601	439.791	392.624	420.182	421.755	439.86	398.065	401.535	419.166	413.07	p value = 0.0030
33.3637	439.576	440.775	426.088	424.319	438.131	448.881	442.64	431.082	392.176	416.913	420.909	443.12	401.989	405.676	423.903	410.746	p value = 0.0070
39.7779	439.176	445.373	429.1	425.943	434.363	450.303	439.523	432.22	392.123	417.687	419.42	443.331	399.657	404.314	422.848	412.208	p value = 0.0047
Time (minutes)	siDNMT1								siDNMT1 + IL-1b
1.30189	439.752	456.192	437.025	443.092	427.544	441.336	448.737	461.799	435.071	424.184	438.889	459.195	421.356	411.969	473.116	433.162	p value = 0.1949
7.71441	400.738	412.218	404.001	417.342	397.086	407.653	410.312	422.472	402.858	389.318	398.637	429.693	382.814	381.571	423.739	401.169	p value = 0.2786
14.1267	395.218	403.036	394.549	413.788	386.735	394.375	399.215	409.011	395.539	380.633	388.453	408.343	375.982	374.694	416.258	395.328	p value = 0.3823
20.537	398.544	404.644	393.67	411.219	387.645	395.442	398.728	410.23	393.554	380.249	387.634	407.753	375.314	374.032	417.14	397.338	p value = 0.1605
26.9483	395.407	400.791	390.833	412.857	385.144	394.668	399.092	414.04	395.663	378.386	390.22	406.251	377.737	372.141	418.829	398.234	p value = 0.3823
33.3637	396.641	401.56	390.476	412.901	384.918	394.38	398.79	410.373	395.762	380.024	383.934	408.046	372.243	372.625	417.877	395.447	p value = 0.2345
39.7779	398.008	404.004	388.864	416.537	386.644	396.054	400.806	409.698	394.355	379.208	383.121	408.342	371.453	373.504	421.314	395.284	p value = 0.1605
