# Supplementary material for: Succinate mediates inflammation-induced adrenocortical dysfunction
Source: eLife journal article supplement (doi:10.7554/elife.83064), 2023-07-14
Supplement: supp [file Figure6_SourceData11.xlsx]

## Sheet: Sheet1
Figure 6 - Source Data 11
Figure 6 O, P, Q: Corticosterone, 11-deoxycorticosterone and progesterone measurement in primary adrenocortical cells transfected with siDnmt1 (or siCtrl) and treated with IL-1b													and ACTH
Summary Statistics (arithmetic from GraphPad Prism 7.04)
Corticosterone (ng / mL)				11-deoxycorticosterone (ng / mL)				Progesterone (ng / mL)
siCtrl	siCtrl + IL-1β	siDnmt1 + IL-1β		siCtrl	siCtrl + IL-1β	siDnmt1 + IL-1β		siCtrl	siCtrl + IL-1β	siDnmt1 + IL-1β
73.622	64.328	68.563		10.728	9.117	9.975		0.75	0.583	0.688
6.244	5.9	7.3		4.45	4.383	3.944		1.006	0.85	0.956
6.028	5.344	9.913		3.611	3.013	4.388		0.489	0.513	0.55
23.411	23.381	25.531		7.1	6.925	8.019		0.428	0.375	0.475
38.061	36.925	41.15		8.967	6.838	9.081		0.85	0.794	0.819
11.238	9.694	10.725		6.988	5.775	6.094		0.45	0.431	0.456
16.969	14.031	11.675		10.256	8.906	10.063		0.775	0.663	0.8
16.169	15.769	21.481		p value = 0.0156				0.675	0.45	0.594
4.263	4.256	6.138			p value = 0.0469			0.681	0.575	0.525
p value = 0.0039								p value = 0.0117
	p value = 0.0391								p value = 0.0234
