# Supplementary material for: Succinate mediates inflammation-induced adrenocortical dysfunction
Source: eLife journal article supplement (doi:10.7554/elife.83064), 2023-07-14
Supplement: supp [file Figure6_SourceData12.xlsx]

## Sheet: Sheet1
Figure 6 - Source Data 12
Figure 6 R: SDH activity in adrenal cortex of LPS-mice treated with Raleukin
Summary Statistics (arithmetic from GraphPad Prism 7.04)
SDH activity (nmol/min/mL)
LPS treated
Control	Raleukin
0.152	0.1783
0.1502	0.1863
0.1418	0.274
p value = 0.0500
