# Supplementary material for: Succinate mediates inflammation-induced adrenocortical dysfunction
Source: eLife journal article supplement (doi:10.7554/elife.83064), 2023-07-14
Supplement: supp [file Figure6_SourceData13.xlsx]

## Sheet: Sheet1
Figure 6 - Source Data 13
Figure 6 S, T: Succinate and fumarate measurement in adrenal gland of LPS-mice treated with Raleukin
Summary Statistics (arithmetic from GraphPad Prism 7.04)
Succinate (ng / adrenal)			Fumarate (ng / adrenal)			Succinate / fumarate ratio
LPS treated			LPS treated			LPS treated
Control	Raleukin		Control	Raleukin		Control	Raleukin
159.3	132.1		74.1	71.8		2.2	1.8
185.5	113.4		66.4	92.5		2.8	1.2
164.1	173.7		82.8	94.5		2	1.8
152.1	133.6		69.6	86.5		2.2	1.5
195.6	168.8		81.4	81		2.4	2.1
175	134.1		71.2	105.3		2.5	1.3
205.7	163.4		118.1	77.6		1.7	2.1
p value = 0.0379						p value = 0.0134
