# Supplementary material for: Succinate mediates inflammation-induced adrenocortical dysfunction
Source: eLife journal article supplement (doi:10.7554/elife.83064), 2023-07-14
Supplement: supp [file Figure6_SourceData14.xlsx]

## Sheet: Sheet1
Figure 6 - Source Data 14
Figure 6 U: Corticosterone measurement in LPS-mice treated with Raleukin
Summary Statistics (arithmetic from GraphPad Prism 7.04)
Corticosterone (ng/mL)
LPS treated
Control	Raleukin
268.49	303.95
262.89	291.79
260.71	265.67
282.31	285.86
299.79	303.09
240.09	293.22
263.62	285.58
p value = 0.0262
